# Supplementary material for: Genetically encoded transcriptional plasticity underlies stress adaptation in Mycobacterium tuberculosis
Source: Research Square preprint supplement (doi:10.21203/rs.3.rs-3303807/v1), 2023-09-18
Supplement: Supplementary file 3 [file Table S3.xlsx]

## Sheet: features
gene	MinExpr	MaxExpr	SD_logRPKM	Mean_logRPKM	Median_logRPKM	Q.25_logRPKM	Q.75_logRPKM	IQR_logRPKM	ShannonIndex	Kurtosis	Skewness	ZeroExpr_proportion	residual.SD_logRPKM	LOESS.fit	TP	symbol	width	strand	AA_A	AA_C	AA_D	AA_E	AA_F	AA_G	AA_H	AA_I	AA_K	AA_L	AA_M	AA_N	AA_P	AA_Q	AA_R	AA_S	AA_T	AA_V	AA_W	AA_Y	basePercent_A	basePercent_C	basePercent_T	basePercent_G	basePercent_GC	basePercent_CT	T3s	C3s	A3s	G3s	CAI
Rv0001	4.47383	11.4473	1.13505	8.45333	8.64976	7.90554	9.13682	1.23128	6.7863	3.81833	-0.681603	0	0.197628	0.93742	1.19935	dnaA	1524	1	0.106509	0.00197239	0.0729783	0.0670611	0.0414201	0.0453649	0.0216963	0.061144	0.0335306	0.0907298	0.0157791	0.0414201	0.0532544	0.0394477	0.0808679	0.061144	0.0828402	0.0552268	0.00986193	0.0177515	0.230971	0.339895	0.17979	0.249344	0.589239	0.519685	0.1792	0.5755	0.1722	0.294	0.297
Rv0002	3.98543	10.0193	1.00054	7.59649	7.63381	7.12349	8.28416	1.16067	6.7866	4.60739	-0.778226	0	0.0780903	0.922452	1.07982	dnaN	1209	1	0.119403	0.00248756	0.0646766	0.0597015	0.0323383	0.0945274	0.00497512	0.0323383	0.0248756	0.126866	0.0149254	0.0223881	0.0671642	0.00995025	0.0646766	0.0671642	0.0721393	0.0995025	0.00497512	0.0149254	0.166253	0.264682	0.234078	0.334988	0.599669	0.498759	0.2528	0.323	0.1246	0.4537	0.22
Rv0003	3.5148	9.65647	0.937516	6.95801	7.08137	6.45976	7.59585	1.13609	6.78624	3.73392	-0.686406	0	0.00629666	0.931219	1.00802	recF	1158	1	0.132468	0.00779221	0.0831169	0.0545455	0.0155844	0.0701299	0.0181818	0.0337662	0.0155844	0.12987	0.0103896	0.0155844	0.038961	0.0207792	0.119481	0.0545455	0.0363636	0.106494	0.012987	0.0233766	0.169257	0.240933	0.231434	0.358377	0.599309	0.472366	0.2632	0.2544	0.172	0.485	0.18
Rv0004	3.45228	8.32041	0.717185	6.89528	6.98991	6.54993	7.3904	0.84047	6.79007	4.54634	-0.95656	0	-0.216383	0.933568	0.785344	Rv0004	564	1	0.149733	0	0.0534759	0.0320856	0	0.117647	0.0160428	0.0374332	0.0374332	0.0641711	0.0213904	0.0160428	0.0588235	0.0427807	0.13369	0.0695187	0.0374332	0.0802139	0.026738	0.00534759	0.171986	0.283688	0.166667	0.37766	0.661348	0.450355	0.2166	0.3248	0.1491	0.4481	0.191
Rv0005	7.23283	12.1764	0.751129	10.2188	10.3274	9.70424	10.7339	1.02963	6.79296	3.52273	-0.583606	0	-0.24206	0.99319	0.759666	gyrB	2028	1	0.0962963	0.00296296	0.0711111	0.0755556	0.0325926	0.082963	0.0266667	0.0488889	0.0711111	0.0785185	0.0177778	0.0311111	0.0296296	0.0296296	0.0592593	0.0592593	0.0637037	0.0903704	0.0103704	0.0222222	0.224852	0.285503	0.173077	0.316568	0.602071	0.45858	0.1524	0.5279	0.1224	0.4538	0.318
Rv0006	6.27892	11.4321	0.748781	9.50653	9.64595	9.14545	9.97403	0.828585	6.79248	6.027	-1.32453	0	-0.218034	0.966815	0.783692	gyrA	2517	1	0.0990453	0.00238663	0.0883055	0.0596659	0.0202864	0.0835322	0.0167064	0.0644391	0.0298329	0.0942721	0.0214797	0.0346062	0.0346062	0.0381862	0.0954654	0.0477327	0.0548926	0.0823389	0.00238663	0.0298329	0.199046	0.312674	0.162098	0.326182	0.638856	0.474772	0.1139	0.5415	0.0944	0.4809	0.314
Rv0007	6.55413	10.0605	0.58852	8.55941	8.63704	8.29826	8.93031	0.632051	6.7933	3.95392	-0.7573	0	-0.351978	0.940498	0.649749	Rv0007	915	1	0.144737	0.00328947	0.0559211	0.0263158	0.0230263	0.121711	0.00986842	0.0427632	0.00986842	0.0855263	0.0164474	0.0361842	0.0986842	0.0263158	0.0789474	0.0888158	0.0493421	0.0592105	0.0131579	0.00986842	0.155191	0.338798	0.162842	0.343169	0.681967	0.501639	0.1552	0.4477	0.1024	0.4274	0.26
Rv0008c	1.24843	8.94915	0.836516	6.49536	6.56874	6.13147	6.9698	0.838336	6.7866	8.42136	-1.43487	0	-0.119112	0.955627	0.882615	Rv0008c	438	0	0.151724	0	0.0206897	0.0689655	0.0137931	0.0758621	0.0137931	0.0275862	0.00689655	0.110345	0.00689655	0.00689655	0.062069	0.062069	0.137931	0.0758621	0.0551724	0.0827586	0.00689655	0.0137931	0.148402	0.369863	0.143836	0.3379	0.707763	0.513699	0.1057	0.5041	0.1278	0.3953	0.18
Rv0009	5.76623	12.0428	1.05529	10.0993	10.3813	9.59338	10.7842	1.19081	6.78992	5.56995	-1.36201	0	0.0668469	0.988441	1.06857	ppiA	549	1	0.0934066	0.00549451	0.0659341	0.032967	0.0604396	0.120879	0.032967	0.0604396	0.0384615	0.043956	0.0164835	0.0494505	0.0659341	0.0384615	0.0384615	0.0549451	0.0989011	0.0604396	0	0.021978	0.204007	0.340619	0.17122	0.284153	0.624772	0.51184	0.1509	0.5723	0.0809	0.424	0.365
Rv0010c	5.09308	11.3837	1.20601	7.99329	7.70084	7.15618	8.56715	1.41098	6.78455	2.4751	0.544832	0	0.28027	0.925738	1.282	Rv0010c	426	0	0.120567	0.0070922	0.0425532	0.0283688	0.0212766	0.120567	0.0070922	0.0780142	0.0070922	0.12766	0.0141844	0.0070922	0.035461	0.0283688	0.113475	0.0425532	0.0851064	0.070922	0.0283688	0.0141844	0.166667	0.29108	0.20892	0.333333	0.624413	0.5	0.1984	0.3889	0.1653	0.3727	0.207
Rv0011c	6.01458	12.4418	0.925189	9.08168	9.12345	8.52298	9.64926	1.12628	6.79052	3.99779	0.184881	0	-0.0285742	0.953763	0.973152	Rv0011c	282	0	0.0967742	0	0.0107527	0	0.0645161	0.0645161	0.0107527	0.0645161	0.0645161	0.11828	0.0752688	0.0322581	0.0537634	0.0322581	0.0322581	0.0752688	0.0537634	0.0860215	0.0537634	0.0107527	0.195035	0.27305	0.241135	0.29078	0.56383	0.514184	0.125	0.5139	0.1159	0.4286	0.216
Rv0012	6.03581	9.58659	0.449556	7.75331	7.73564	7.51496	8.04342	0.528461	6.79403	4.90118	0.0912687	0	-0.473788	0.923344	0.527938	Rv0012	789	1	0.148855	0.0152672	0.0610687	0.0343511	0.0152672	0.0687023	0.0267176	0.0419847	0.00763359	0.103053	0.0305344	0.0305344	0.0610687	0.0496183	0.0916031	0.0419847	0.0534351	0.0839695	0.00763359	0.0267176	0.171103	0.325729	0.181242	0.321926	0.647655	0.506971	0.1667	0.4474	0.1165	0.4513	0.234
Rv0013	4.58991	9.50305	0.751214	7.65527	7.78375	7.27024	8.20237	0.932129	6.79073	4.05343	-0.843715	0	-0.171492	0.922706	0.830235	trpG	699	1	0.103448	0.0172414	0.0431034	0.0431034	0.0344828	0.0948276	0.0517241	0.0431034	0.00862069	0.107759	0.00862069	0.0258621	0.0560345	0.0344828	0.0517241	0.0689655	0.0862069	0.0948276	0.012931	0.012931	0.178827	0.336195	0.181688	0.30329	0.639485	0.517883	0.1449	0.5024	0.1304	0.3966	0.277
Rv0014c	4.17116	9.17215	0.856342	7.60629	7.77785	7.12535	8.27591	1.15056	6.78908	3.76924	-0.98384	0	-0.0661435	0.922486	0.935583	pknB	1881	0	0.108626	0.00319489	0.0734824	0.043131	0.0239617	0.0814696	0.0191693	0.0527157	0.028754	0.0670927	0.0159744	0.0415335	0.071885	0.0383387	0.0607029	0.0638978	0.0734824	0.107029	0.00479233	0.0207668	0.204147	0.350877	0.163211	0.281765	0.632642	0.514088	0.1268	0.5846	0.1463	0.3283	0.292
Rv0015c	2.93678	9.922	0.800541	7.95067	8.039	7.52762	8.48815	0.960533	6.79029	8.85591	-1.43352	0	-0.124588	0.925129	0.877138	pknA	1296	0	0.12993	0	0.0324826	0.0417633	0.0162413	0.0974478	0.0232019	0.0417633	0.025522	0.0765661	0.0232019	0.0301624	0.0951276	0.0348028	0.0904872	0.0649652	0.0719258	0.0765661	0.00928074	0.0185615	0.175926	0.345679	0.147377	0.331019	0.676698	0.493056	0.1367	0.4584	0.1123	0.4438	0.261
Rv0016c	5.8004	9.41224	0.660226	7.83306	7.99755	7.49942	8.29781	0.79839	6.79206	3.26154	-0.856847	0	-0.263767	0.923993	0.737959	pbpA	1476	0	0.144603	0.00814664	0.0407332	0.0407332	0.0244399	0.089613	0.00814664	0.0448065	0.0224033	0.0916497	0.0162933	0.0346232	0.0794297	0.0509165	0.0651731	0.0590631	0.0794297	0.0672098	0.00610998	0.0264766	0.191057	0.345528	0.163957	0.299458	0.644986	0.509485	0.1415	0.4764	0.161	0.3918	0.279
Rv0017c	4.72901	8.95209	0.840414	7.36732	7.4192	6.86211	7.92144	1.05933	6.78904	2.98249	-0.480689	0	-0.082499	0.922913	0.919227	rodA	1410	0	0.115139	0.00426439	0.0298507	0.0234542	0.0575693	0.0852878	0.0170576	0.0639659	0.0170576	0.166311	0.0149254	0.0191898	0.0533049	0.0319829	0.0575693	0.0490405	0.0724947	0.0831557	0.0149254	0.0234542	0.160993	0.331915	0.21773	0.289362	0.621277	0.549645	0.114	0.4703	0.1458	0.4322	0.272
Rv0018c	3.93268	9.87867	0.586913	8.02849	8.11273	7.7809	8.36771	0.586809	6.7929	10.1962	-1.57603	0	-0.339419	0.926332	0.662308	pstP	1545	0	0.13035	0.00972763	0.0622568	0.0486381	0.0077821	0.0856031	0.0175097	0.0428016	0.00972763	0.110895	0.0233463	0.0194553	0.0953307	0.0350195	0.0700389	0.07393	0.0700389	0.0622568	0.00389105	0.0214008	0.166343	0.363754	0.157929	0.311974	0.675728	0.521683	0.1347	0.4945	0.114	0.4093	0.282
Rv0019c	6.5239	10.4376	0.512319	9.08824	9.17101	8.74826	9.45148	0.703225	6.79409	4.23936	-0.728502	0	-0.441628	0.953947	0.560099	fhaB	468	0	0.0967742	0	0.0451613	0.0322581	0.0129032	0.0903226	0.0129032	0.0516129	0.0193548	0.141935	0.0322581	0.00645161	0.0322581	0.0258065	0.116129	0.0451613	0.103226	0.083871	0.0193548	0.0322581	0.173077	0.288462	0.196581	0.34188	0.630342	0.485043	0.1185	0.3852	0.1385	0.5	0.267
Rv0020c	7.22285	10.9504	0.482246	9.86639	9.88658	9.60499	10.1807	0.575721	6.79449	7.54037	-1.16478	0	-0.497284	0.979531	0.504442	fhaA	1584	0	0.0626186	0.00189753	0.0721063	0.0550285	0.0151803	0.178368	0.0170778	0.0265655	0.00759013	0.0417457	0.0056926	0.0208729	0.108159	0.0910816	0.0796964	0.0493359	0.0360531	0.0436433	0.0056926	0.0815939	0.188763	0.340278	0.147727	0.323232	0.66351	0.488005	0.1864	0.5477	0.1387	0.3552	0.304
Rv0021c	2.94259	10.6456	0.922506	6.00926	5.81339	5.43904	6.588	1.14896	6.78422	6.1349	0.868135	0	-0.0732459	0.995752	0.928481	Rv0021c	969	0	0.170807	0.00931677	0.0652174	0.0310559	0.0248447	0.108696	0.0124224	0.0465839	0.00310559	0.10559	0.0310559	0.0124224	0.0434783	0.052795	0.0621118	0.0372671	0.068323	0.0776398	0.0124224	0.0248447	0.165119	0.324045	0.174407	0.336429	0.660475	0.498452	0.1281	0.4947	0.1341	0.4024	0.229
Rv0022c	0	11.6213	1.24763	3.09868	3.02	2.58172	3.42569	0.843971	6.71399	16.7467	2.15857	0.0257271	-0.095919	1.34355	0.905808	whiB5	420	0	0.151079	0.028777	0.0503597	0.057554	0.00719424	0.0863309	0.0359712	0.0359712	0.0215827	0.0863309	0.00719424	0.0215827	0.0791367	0.0719424	0.100719	0.0215827	0.0215827	0.0719424	0.0143885	0.028777	0.180952	0.352381	0.135714	0.330952	0.683333	0.488095	0.1217	0.5217	0.1607	0.4112	0.253
Rv0023	2.55079	8.68672	0.791769	6.06517	6.10708	5.65182	6.58668	0.934865	6.78669	6.09056	-0.849939	0	-0.198789	0.990558	0.802938	Rv0023	771	1	0.175781	0.0078125	0.0625	0.0664062	0.0078125	0.0664062	0.015625	0.0390625	0.0195312	0.0976562	0.0234375	0.0195312	0.0429688	0.0273438	0.0898438	0.0820312	0.046875	0.078125	0.0117188	0.0195312	0.168612	0.330739	0.158236	0.342412	0.673152	0.488975	0.137	0.4977	0.1121	0.4167	0.251
Rv0024	0	8.16631	0.724322	6.00929	6.06813	5.65201	6.42964	0.777637	6.78754	11.0378	-1.38513	0.00111857	-0.271427	0.995749	0.730299	Rv0024	846	1	0.160142	0.00355872	0.0427046	0.0213523	0.0106762	0.088968	0.0355872	0.0284698	0.00355872	0.0996441	0.00711744	0.0284698	0.0533808	0.0498221	0.13879	0.0604982	0.0462633	0.0854093	0.0106762	0.024911	0.146572	0.333333	0.163121	0.356974	0.690307	0.496454	0.1719	0.3828	0.1059	0.4825	0.204
Rv0025	4.11819	8.69968	0.794406	6.88096	6.95872	6.36866	7.5439	1.17524	6.78887	2.879	-0.517044	0	-0.139752	0.934157	0.861975	Rv0025	363	1	0.225	0	0.075	0.0833333	0.0166667	0.0166667	0.025	0.025	0.025	0.0916667	0.025	0	0.025	0.075	0.108333	0.05	0.025	0.1	0	0.00833333	0.187328	0.31405	0.15978	0.338843	0.652893	0.473829	0.1895	0.4421	0.1569	0.4141	0.237
Rv0026	3.69365	7.95711	0.738788	6.29924	6.36436	5.84643	6.85222	1.00579	6.78863	3.15214	-0.565928	0	-0.231385	0.970173	0.770341	Rv0026	1347	1	0.15625	0.00446429	0.0825893	0.0580357	0.0200893	0.0892857	0.0133929	0.0334821	0.0200893	0.0982143	0.00892857	0.0200893	0.0825893	0.046875	0.0580357	0.0669643	0.0736607	0.0491071	0.00669643	0.0111607	0.191537	0.328879	0.157387	0.322197	0.651076	0.486266	0.1658	0.4041	0.1791	0.4318	0.248
Rv0027	2.61611	9.25918	0.705648	6.58369	6.60505	6.19167	7.04409	0.852419	6.78983	4.83494	-0.357164	0	-0.24427	0.949918	0.757457	Rv0027	318	1	0.12381	0.00952381	0.0761905	0.0571429	0.00952381	0.0380952	0.0666667	0.0571429	0.00952381	0.0952381	0.0190476	0.0285714	0.0285714	0.0952381	0.104762	0.0857143	0.047619	0.0190476	0.00952381	0.0190476	0.220126	0.330189	0.150943	0.298742	0.628931	0.481132	0.1765	0.4706	0.125	0.5	0.24
Rv0028	0	8.9573	1.03454	6.2371	6.10959	5.61561	7.0408	1.42519	6.78124	4.1145	-0.218134	0.00111857	0.0592131	0.975327	1.06094	Rv0028	306	1	0.138614	0.019802	0.0594059	0.0693069	0.00990099	0.039604	0.049505	0.039604	0.019802	0.118812	0.029703	0.039604	0.039604	0.019802	0.0693069	0.0693069	0.0792079	0.0792079	0	0.00990099	0.199346	0.346405	0.163399	0.29085	0.637255	0.509804	0.1379	0.5402	0.1139	0.4	0.361
Rv0029	4.20523	9.16637	0.529767	6.85468	6.87529	6.58687	7.17927	0.592404	6.79265	7.56118	-0.613539	0	-0.405528	0.935295	0.596198	Rv0029	1098	1	0.150685	0.0136986	0.060274	0.0547945	0.0136986	0.0630137	0.0273973	0.0410959	0.00821918	0.0986301	0.0246575	0.0164384	0.0575342	0.0246575	0.109589	0.0520548	0.0767123	0.0794521	0.0191781	0.00821918	0.165756	0.325137	0.173042	0.336066	0.661202	0.498179	0.1572	0.4245	0.1371	0.4366	0.206
Rv0030	3.41723	9.4165	0.824106	6.99186	7.05579	6.6115	7.4777	0.866204	6.78845	4.96896	-0.812687	0	-0.105996	0.930102	0.895731	Rv0030	330	1	0.110092	0	0.0917431	0.0917431	0	0.0733945	0.0183486	0.00917431	0.00917431	0.12844	0.0183486	0.0275229	0.0183486	0.0275229	0.0917431	0.0917431	0.0550459	0.100917	0.00917431	0.0275229	0.178788	0.278788	0.166667	0.375758	0.654545	0.445455	0.1522	0.4457	0.0795	0.5057	0.24
Rv0032	1.98801	7.61027	1.02717	4.81774	4.70945	4.15261	5.42664	1.27403	6.77322	3.12294	0.453842	0	-0.107742	1.13491	0.893984	bioF2	2316	1	0.103761	0.0129702	0.0674449	0.0557717	0.0440986	0.076524	0.0350195	0.0376135	0.0220493	0.115435	0.0259403	0.0233463	0.0479896	0.0220493	0.0933852	0.0557717	0.0531777	0.0596628	0.0103761	0.0376135	0.183074	0.302245	0.196459	0.318221	0.620466	0.498705	0.1547	0.4535	0.1309	0.4835	0.231
Rv0033	0	9.09768	1.50359	4.31535	4.40533	3.36211	5.25783	1.89572	6.72074	3.57742	-0.412675	0.0279642	0.308194	1.19539	1.30992	acpA	264	1	0.103448	0	0.091954	0.0574713	0.0574713	0.0574713	0	0.091954	0.0574713	0.091954	0.0114943	0.0344828	0.0344828	0.045977	0.045977	0.0344828	0.091954	0.0689655	0.0114943	0.0114943	0.265152	0.32197	0.166667	0.246212	0.568182	0.488636	0.0563	0.6479	0.25	0.3	0.305
Rv0034	0	7.41349	1.28965	4.08634	4.04962	3.28677	4.99631	1.70954	6.73526	3.92091	-0.436	0.0190157	0.0665214	1.22313	1.06825	Rv0034	396	1	0.167939	0.0152672	0.0992366	0.0458015	0.0534351	0.0763359	0.00763359	0.0229008	0.0152672	0.0916031	0.0152672	0.0152672	0.0229008	0.0305344	0.0763359	0.0305344	0.0839695	0.10687	0.00763359	0.0152672	0.166667	0.318182	0.176768	0.338384	0.656566	0.494949	0.1466	0.5517	0.0891	0.3878	0.262
Rv0035	0	7.96183	1.33737	5.02149	4.89808	4.0376	6.24256	2.20496	6.75841	2.38253	-0.1313	0.00111857	0.227611	1.10976	1.22934	fadD34	1689	1	0.128114	0.0177936	0.0604982	0.0551601	0.0391459	0.0765125	0.0338078	0.0516014	0.0213523	0.103203	0.019573	0.0160142	0.0480427	0.0266904	0.0765125	0.0516014	0.0800712	0.0658363	0.0088968	0.019573	0.195382	0.349319	0.168739	0.28656	0.635879	0.518058	0.1148	0.584	0.161	0.3252	0.28
Rv0036c	1.94048	9.34133	0.713375	7.5966	7.72813	7.42665	7.94822	0.52157	6.7906	21.2295	-3.42151	0	-0.209077	0.922452	0.792649	Rv0036c	774	0	0.175097	0.00389105	0.0817121	0.0466926	0.0350195	0.07393	0.0233463	0.0233463	0.00389105	0.105058	0.0194553	0.0155642	0.07393	0.0233463	0.077821	0.0389105	0.07393	0.0661479	0.0350195	0.00389105	0.155039	0.344961	0.157623	0.342377	0.687339	0.502584	0.1295	0.4554	0.1443	0.4256	0.264
Rv0037c	1.96041	8.63325	0.63086	6.5716	6.59791	6.25392	6.96248	0.708565	6.79069	13.3454	-1.8063	0	-0.31981	0.95067	0.681917	Rv0037c	1326	0	0.163265	0.00453515	0.0362812	0.0113379	0.0453515	0.108844	0.0249433	0.0430839	0.00226757	0.138322	0.0226757	0.0181406	0.0453515	0.0226757	0.0657596	0.047619	0.0362812	0.131519	0.0204082	0.0113379	0.113122	0.315988	0.209653	0.361237	0.677225	0.525641	0.0958	0.4398	0.0997	0.4942	0.213
Rv0038	5.40771	9.74386	0.568211	8.2784	8.29141	7.89584	8.66483	0.768996	6.79333	3.82389	-0.351304	0	-0.364086	0.932297	0.63764	Rv0038	609	1	0.113861	0.0049505	0.0693069	0.0544554	0.00990099	0.0841584	0.0247525	0.039604	0.019802	0.133663	0.0148515	0.0247525	0.0792079	0.0247525	0.0742574	0.0346535	0.039604	0.113861	0.019802	0.019802	0.170772	0.298851	0.175698	0.35468	0.65353	0.474548	0.1136	0.4205	0.1333	0.5096	0.248
Rv0039c	1.72271	9.68456	1.3112	7.27323	7.46863	6.63074	8.17112	1.54038	6.77783	4.71986	-1.04005	0	0.387209	0.923994	1.38894	Rv0039c	348	0	0.26087	0.0695652	0.00869565	0.00869565	0.0173913	0.0782609	0.026087	0.0173913	0	0.0956522	0.0434783	0.00869565	0.0434783	0.0347826	0.026087	0.0608696	0.0782609	0.0956522	0.0173913	0.00869565	0.109195	0.33908	0.172414	0.37931	0.718391	0.511494	0.0971	0.4563	0.0543	0.5111	0.275
Rv0040c	4.93282	10.9772	1.19837	8.3605	8.59161	7.52439	9.27918	1.75479	6.78515	2.5476	-0.402743	0	0.263698	0.93467	1.26542	mtc28	933	0	0.13871	0	0.0451613	0.016129	0.0290323	0.0806452	0.016129	0.0516129	0.0193548	0.0709677	0.016129	0.0322581	0.148387	0.0354839	0.0419355	0.0645161	0.0774194	0.0870968	0.00967742	0.0193548	0.17149	0.375134	0.153269	0.300107	0.675241	0.528403	0.1	0.4607	0.1318	0.4587	0.247
Rv0041	5.13325	8.84635	0.627632	7.10741	7.14539	6.77597	7.4878	0.711833	6.79176	3.54202	-0.282413	0	-0.29935	0.926982	0.702376	leuS	2910	1	0.110423	0.00412797	0.0794634	0.0629515	0.0371517	0.0825593	0.0216718	0.0319917	0.0257998	0.0835913	0.0134159	0.0299278	0.0639835	0.0227038	0.0784314	0.0433437	0.0526316	0.0887513	0.0237358	0.0433437	0.185223	0.304124	0.185223	0.32543	0.629553	0.489347	0.1671	0.4855	0.1269	0.4366	0.263
Rv0042c	3.48603	9.86195	0.988033	7.92799	8.19425	7.6251	8.58997	0.96487	6.78723	6.33861	-1.70474	0	0.0631747	0.924858	1.0649	Rv0042c	627	0	0.129808	0.00480769	0.0480769	0.0432692	0.00961538	0.0673077	0.0240385	0.0384615	0.0384615	0.134615	0.0240385	0.0192308	0.0625	0.0336538	0.115385	0.0769231	0.0625	0.0625	0	0.00480769	0.196172	0.325359	0.165869	0.3126	0.637959	0.491228	0.1453	0.3966	0.1833	0.4244	0.208
Rv0043c	4.05174	9.50152	0.725424	6.92677	6.96673	6.52833	7.35965	0.831321	6.79007	4.893	-0.521701	0	-0.206918	0.932342	0.794808	Rv0043c	735	0	0.110656	0.0122951	0.0409836	0.0778689	0.0327869	0.0655738	0.0327869	0.0532787	0.0245902	0.0901639	0.0204918	0.0368852	0.0696721	0.0327869	0.106557	0.0532787	0.0327869	0.0696721	0.00819672	0.0286885	0.198639	0.341497	0.164626	0.295238	0.636735	0.506122	0.1078	0.5637	0.1562	0.3911	0.263
Rv0044c	2.32749	8.8513	0.615191	6.45415	6.4959	6.20741	6.76919	0.561782	6.79091	9.44243	-1.19864	0	-0.343273	0.958463	0.658454	Rv0044c	795	0	0.113636	0.0227273	0.0795455	0.0378788	0.0227273	0.109848	0.030303	0.0530303	0.0227273	0.102273	0.00757576	0.0151515	0.0568182	0.0189394	0.0795455	0.0530303	0.0568182	0.0606061	0.0227273	0.0340909	0.166038	0.348428	0.168553	0.316981	0.665409	0.516981	0.1319	0.5787	0.099	0.367	0.288
Rv0045c	5.33637	10.7492	0.906659	7.81228	7.72283	7.13496	8.36958	1.23462	6.78904	3.00042	0.417894	0	-0.0171574	0.923817	0.984569	Rv0045c	897	0	0.114094	0	0.0671141	0.0637584	0.033557	0.104027	0.0402685	0.033557	0.00671141	0.114094	0.0167785	0.0268456	0.0469799	0.033557	0.0771812	0.057047	0.0503356	0.0872483	0.0201342	0.00671141	0.160535	0.329989	0.168339	0.341137	0.671126	0.498328	0.1128	0.5097	0.1144	0.4469	0.276
Rv0046c	6.69139	12.61	1.06639	9.69922	9.75798	8.96598	10.4431	1.47717	6.7896	2.63086	-0.17679	0	0.0929387	0.973453	1.09467	ino1	1104	0	0.106267	0.00544959	0.0871935	0.0572207	0.0381471	0.0681199	0.0163488	0.0599455	0.0626703	0.0708447	0.0163488	0.0326975	0.0517711	0.0299728	0.0463215	0.0572207	0.0381471	0.114441	0.0108992	0.0299728	0.193841	0.32337	0.166667	0.316123	0.639493	0.490036	0.0695	0.6358	0.0571	0.4961	0.32
Rv0047c	5.72692	13.8835	1.2834	9.34653	9.20051	8.52477	10.1715	1.64672	6.78635	3.27236	0.366333	0	0.321765	0.96163	1.32349	Rv0047c	543	0	0.122222	0	0.0333333	0.0944444	0.0388889	0.0833333	0.0222222	0.0277778	0.0166667	0.122222	0.0222222	0.0277778	0.0444444	0.0333333	0.144444	0.0444444	0.0444444	0.0388889	0.00555556	0.0333333	0.18232	0.333333	0.152855	0.331492	0.664825	0.486188	0.0805	0.5302	0.1429	0.4437	0.254
Rv0048c	3.51075	8.97568	0.849076	6.55103	6.42071	6.05522	7.03085	0.975623	6.78736	3.4138	0.347766	0	-0.102896	0.951972	0.89883	Rv0048c	870	0	0.114187	0.00346021	0.083045	0.0346021	0.017301	0.0968858	0.0103806	0.0276817	0.0484429	0.114187	0.0207612	0.00346021	0.0553633	0.0242215	0.0692042	0.083045	0.0622837	0.083045	0.0103806	0.0380623	0.174713	0.335632	0.166667	0.322989	0.658621	0.502299	0.112	0.548	0.1059	0.3991	0.296
Rv0049	5.75672	10.5752	0.619189	8.86396	8.87313	8.54808	9.22631	0.678229	6.79322	5.35182	-0.563184	0	-0.328839	0.948028	0.672888	Rv0049	414	1	0.109489	0.0364964	0.0145985	0.0656934	0.0291971	0.080292	0.0291971	0.0218978	0.0291971	0.0948905	0.00729927	0.0218978	0.0437956	0.00729927	0.116788	0.0875912	0.0656934	0.0948905	0.0145985	0.0291971	0.15942	0.318841	0.173913	0.347826	0.666667	0.492754	0.1074	0.4463	0.1327	0.4818	0.221
Rv0050	4.88218	10.3487	0.794341	8.24457	8.31911	7.86191	8.74858	0.886673	6.79085	5.802	-1.11402	0	-0.137016	0.931357	0.86471	ponA1	2037	1	0.122419	0.00294985	0.0545723	0.0412979	0.0280236	0.0988201	0.0132743	0.0516224	0.039823	0.0693215	0.020649	0.0442478	0.0840708	0.0442478	0.0324484	0.0560472	0.0752212	0.0811209	0.0103245	0.0294985	0.194404	0.313697	0.172312	0.319588	0.633284	0.486009	0.1571	0.4607	0.0924	0.502	0.299
Rv0051	2.43545	8.44037	0.886478	6.58016	6.74361	6.19271	7.15776	0.965052	6.78568	7.2218	-1.64256	0	-0.0636589	0.950137	0.938068	Rv0051	1683	1	0.123214	0.0125	0.0428571	0.0160714	0.0410714	0.0785714	0.00892857	0.0321429	0.0142857	0.146429	0.0214286	0.0285714	0.0678571	0.0267857	0.075	0.0517857	0.0642857	0.0821429	0.0321429	0.0339286	0.142008	0.307784	0.212715	0.337493	0.645276	0.520499	0.1323	0.4088	0.0892	0.5298	0.261
Rv0052	2.38544	8.56556	0.820022	6.4614	6.62669	6.05049	7.03241	0.981921	6.78708	5.64106	-1.20529	0	-0.137933	0.957956	0.863793	Rv0052	564	1	0.101604	0.0106952	0.0588235	0.0534759	0.0320856	0.0802139	0.0427807	0.0320856	0.00534759	0.13369	0.0213904	0.0160428	0.0481283	0.0320856	0.0802139	0.0534759	0.0695187	0.101604	0.0106952	0.0160428	0.154255	0.322695	0.18617	0.336879	0.659574	0.508865	0.1152	0.4727	0.094	0.4965	0.238
Rv0053	5.28048	14.0509	1.14178	9.57269	9.59096	8.92163	10.3341	1.41251	6.78847	4.26711	-0.191478	0	0.172735	0.969048	1.17446	rpsF	291	1	0.0729167	0	0.0729167	0.0833333	0.0104167	0.0416667	0.0208333	0.0625	0.0833333	0.09375	0.03125	0.0208333	0.0416667	0.0104167	0.0833333	0.0416667	0.0625	0.125	0.0104167	0.03125	0.24055	0.312715	0.158076	0.28866	0.601375	0.47079	0.0533	0.6533	0.1429	0.3944	0.33
Rv0054	5.72141	13.1929	0.998272	9.05335	8.97192	8.45235	9.62443	1.17208	6.78971	5.70934	0.636692	0	0.0452939	0.952978	1.04702	ssb	495	1	0.115854	0.00609756	0.054878	0.0792683	0.0426829	0.115854	0	0.0426829	0.0304878	0.0426829	0.00609756	0.0304878	0.0609756	0.0182927	0.0853659	0.097561	0.0792683	0.0609756	0.0182927	0.0121951	0.179798	0.313131	0.153535	0.353535	0.666667	0.466667	0.1571	0.5071	0.0949	0.4231	0.25
Rv0055	5.00513	13.3081	1.22328	9.1916	9.26008	8.35214	9.86967	1.51753	6.78685	4.03304	0.22878	0	0.266369	0.956915	1.2681	rpsR1	255	1	0.119048	0.0357143	0.047619	0.0357143	0.0238095	0.0238095	0.0119048	0.047619	0.119048	0.0595238	0.0119048	0.0238095	0.047619	0.0357143	0.130952	0.0595238	0.0595238	0.0833333	0	0.0238095	0.211765	0.313725	0.141176	0.333333	0.647059	0.454902	0.0746	0.5224	0.058	0.6	0.321
Rv0056	4.38853	12.5562	1.0214	9.31254	9.39061	8.78872	9.91061	1.12189	6.78948	5.59601	-0.614365	0	0.0608348	0.960569	1.06256	rplI	459	1	0.125	0	0.0723684	0.0526316	0.0197368	0.0789474	0.0394737	0.0723684	0.0789474	0.0921053	0.00657895	0.0197368	0.0394737	0.0197368	0.0592105	0.0592105	0.0460526	0.111842	0	0.00657895	0.204793	0.298475	0.174292	0.32244	0.620915	0.472767	0.1641	0.4766	0.0945	0.4914	0.263
Rv0057	4.03504	12.3581	1.36615	8.15895	8.11724	7.34223	8.96938	1.62715	6.78148	3.33923	0.0044263	0	0.437019	0.929129	1.43875	Rv0057	522	1	0.104046	0.0231214	0.0462428	0.0115607	0.0231214	0.115607	0.017341	0.0115607	0.017341	0.0809249	0.0462428	0.0404624	0.0635838	0.0115607	0.0693642	0.0982659	0.0751445	0.104046	0.017341	0.0231214	0.176245	0.275862	0.216475	0.331418	0.60728	0.492337	0.2194	0.3742	0.1515	0.3846	0.217
Rv0058	4.74653	12.2219	0.958553	8.06843	8.21797	7.54268	8.60985	1.06717	6.78855	5.12011	-0.087057	0	0.0314584	0.927095	1.03318	dnaB	2625	1	0.10984	0.00572082	0.0686499	0.0594966	0.0251716	0.0697941	0.0297483	0.0446224	0.0343249	0.0995423	0.0320366	0.0217391	0.0526316	0.0331808	0.0995423	0.0675057	0.0389016	0.0755149	0.0125858	0.0194508	0.191619	0.297524	0.18019	0.330667	0.62819	0.477714	0.1727	0.4309	0.1312	0.476	0.253
Rv0059	1.9666	10.5846	1.25799	6.48016	6.66886	5.61368	7.34316	1.72948	6.77588	3.33092	-0.414826	0	0.301331	0.95666	1.30306	Rv0059	693	1	0.0869565	0.0217391	0.073913	0.026087	0.0304348	0.0782609	0.0391304	0.0391304	0.0347826	0.0695652	0.0217391	0.026087	0.0652174	0.0173913	0.073913	0.0608696	0.0652174	0.0956522	0.0173913	0.0565217	0.193362	0.329004	0.18759	0.290043	0.619048	0.516595	0.1675	0.5616	0.0976	0.3677	0.271
Rv0060	5.7212	12.5458	0.838412	8.32541	8.2874	7.88421	8.80231	0.918108	6.7907	6.53159	0.642223	0	-0.0952316	0.933643	0.906495	Rv0060	1059	1	0.113636	0.00568182	0.0653409	0.0596591	0.0255682	0.0965909	0.0142045	0.0596591	0.0426136	0.0880682	0.0284091	0.0198864	0.0482955	0.0284091	0.0767045	0.0340909	0.0625	0.0795455	0.0170455	0.0340909	0.216242	0.300283	0.183192	0.300283	0.600567	0.483475	0.1862	0.5	0.1978	0.3191	0.258
Rv0061c	7.06397	12.2714	0.887763	9.4208	9.40137	8.86905	9.98906	1.12001	6.79127	3.40284	0.184119	0	-0.0762353	0.963999	0.925491	Rv0061c	339	0	0.0982143	0.0446429	0.0625	0.0267857	0.0625	0.142857	0.0178571	0.0178571	0.0357143	0.0535714	0.0267857	0.00892857	0.151786	0.0446429	0.0178571	0.0535714	0.0357143	0.0357143	0.0357143	0.0267857	0.156342	0.297935	0.221239	0.324484	0.622419	0.519174	0.3011	0.3871	0.125	0.3974	0.304
Rv0062	2.41942	9.52866	1.24625	6.8317	6.96534	6.08841	7.75299	1.66458	6.77793	3.54451	-0.709466	0	0.309898	0.93635	1.31162	celA1	1143	1	0.168421	0.0131579	0.0552632	0.0263158	0.0236842	0.1	0.0184211	0.0368421	0.00526316	0.0657895	0.0157895	0.0342105	0.0763158	0.0236842	0.0815789	0.0605263	0.0631579	0.0736842	0.0210526	0.0368421	0.146982	0.349081	0.170604	0.333333	0.682415	0.519685	0.1565	0.4899	0.0842	0.417	0.25
Rv0063	3.08204	8.0302	0.8586	6.32534	6.35826	5.83708	6.93422	1.09714	6.7861	3.64777	-0.672591	0	-0.109479	0.968079	0.892248	Rv0063	1440	1	0.150313	0.00835073	0.0417537	0.0125261	0.0375783	0.118998	0.0187891	0.0187891	0.0104384	0.0876827	0.0146138	0.0438413	0.0605428	0.0417537	0.0480167	0.0709812	0.0835073	0.085595	0.0167015	0.0292276	0.155556	0.345139	0.172222	0.327083	0.672222	0.517361	0.1198	0.4908	0.1029	0.4351	0.266
Rv0063a	3.46653	13.5873	1.07661	7.85093	7.87309	7.2111	8.5521	1.341	6.78612	4.60045	-0.120188	0	0.152468	0.924147	1.15419	Rv0063a	162	1	0.226415	0	0	0.0943396	0	0.0566038	0.0188679	0.0754717	0	0.113208	0.0377358	0.0188679	0.0754717	0.0188679	0.0943396	0.0754717	0.0377358	0.0566038	0	0	0.160494	0.333333	0.17284	0.333333	0.666667	0.506173	0.1522	0.3913	0.16	0.413	0.244
Rv0064	5.08278	11.6469	0.904116	7.20682	7.09003	6.64343	7.68054	1.03711	6.78808	5.22615	0.995372	0	-0.0209014	0.925017	0.980825	Rv0064	2940	1	0.100102	0.0020429	0.0541369	0.0418795	0.0459653	0.0776302	0.0122574	0.0449438	0.0224719	0.0970378	0.0102145	0.0255363	0.0755873	0.0377937	0.0735444	0.0592441	0.0653728	0.0990807	0.0153218	0.0398366	0.170068	0.323469	0.193197	0.313265	0.636735	0.516667	0.1358	0.4813	0.1041	0.4714	0.274
Rv0064A	0	10.707	1.00621	5.85809	5.91846	5.38036	6.36123	0.980872	6.77861	9.46577	-0.670181	0.00447427	-0.00395769	1.01017	0.997769	vapB1	240	1	0.139241	0	0.0379747	0.113924	0	0.0759494	0	0.0759494	0.0253165	0.0759494	0.0253165	0	0.0253165	0.0506329	0.139241	0.0632911	0.0886076	0.0379747	0	0.0253165	0.225	0.3	0.133333	0.341667	0.641667	0.433333	0.1452	0.4677	0.1667	0.4091	0.182
Rv0065	0	9.58729	1.29978	6.0143	5.95737	5.09215	7.1187	2.02655	6.77134	2.92531	-0.10398	0.00111857	0.304495	0.99528	1.30622	vapC1	402	1	0.165414	0.0150376	0.075188	0.0601504	0.0075188	0.0451128	0.0300752	0.0451128	0.0225564	0.157895	0.0075188	0.0225564	0.0526316	0.0150376	0.0676692	0.0526316	0.0300752	0.0827068	0.0075188	0.037594	0.179104	0.325871	0.196517	0.298507	0.624378	0.522388	0.1765	0.4706	0.1495	0.3861	0.269
Rv0066c	5.24484	9.35951	0.644732	7.35989	7.36239	6.94793	7.73876	0.790833	6.79187	3.32328	0.0988743	0	-0.278245	0.922977	0.723481	icd2	2238	0	0.0979866	0.00805369	0.0751678	0.0711409	0.0322148	0.0671141	0.0255034	0.0563758	0.0590604	0.0885906	0.0375839	0.0322148	0.0496644	0.033557	0.0510067	0.0550336	0.0536913	0.0671141	0.00805369	0.0308725	0.223414	0.310545	0.158624	0.307417	0.617962	0.469169	0.09	0.5874	0.102	0.4932	0.363
Rv0067c	2.1255	9.24527	0.767726	5.46022	5.41168	4.95837	5.90875	0.950373	6.78595	6.38171	0.671838	0	-0.284283	1.05201	0.717443	Rv0067c	570	0	0.174603	0.00529101	0.0793651	0.047619	0.031746	0.0687831	0.021164	0.031746	0.037037	0.111111	0.021164	0.015873	0.031746	0.031746	0.0952381	0.031746	0.047619	0.0952381	0.00529101	0.015873	0.178947	0.319298	0.170175	0.331579	0.650877	0.489474	0.1288	0.5031	0.1438	0.4082	0.245
Rv0068	2.17765	10.6135	1.03937	4.99487	4.90558	4.3247	5.37458	1.04988	6.77544	8.47254	1.54744	0	-0.0738307	1.1132	0.927896	Rv0068	912	1	0.151815	0	0.0462046	0.0462046	0.0264026	0.0891089	0.029703	0.039604	0.019802	0.105611	0.0165017	0.0264026	0.0462046	0.049505	0.0759076	0.039604	0.0759076	0.0825083	0.00990099	0.0231023	0.183114	0.347588	0.158991	0.310307	0.657895	0.506579	0.1154	0.5308	0.1406	0.3882	0.267
Rv0069c	1.96814	7.9893	0.973468	5.91896	6.03085	5.30826	6.62214	1.31388	6.78138	3.67533	-0.691981	0	-0.0308443	1.00431	0.970882	sdaA	1386	0	0.130152	0.021692	0.0477223	0.0694143	0.021692	0.101952	0.0303688	0.0629067	0.0151844	0.0867679	0.0238612	0.032538	0.0433839	0.021692	0.0694143	0.0520607	0.0694143	0.0824295	0.00433839	0.0130152	0.188312	0.338384	0.160895	0.31241	0.650794	0.499278	0.1053	0.5789	0.1429	0.3567	0.285
Rv0070c	2.74602	8.3649	1.05144	5.81293	5.88675	5.09125	6.67223	1.58097	6.77877	2.67145	-0.319327	0	0.0368906	1.01455	1.03862	glyA2	1278	0	0.155294	0.00705882	0.0658824	0.0423529	0.0305882	0.0847059	0.0376471	0.0470588	0.0235294	0.0964706	0.0258824	0.0329412	0.0564706	0.0423529	0.0658824	0.0329412	0.0541176	0.0682353	0.00235294	0.0282353	0.183881	0.373239	0.15493	0.28795	0.661189	0.528169	0.0926	0.6294	0.1193	0.355	0.318
Rv0071	0	8.14427	1.09288	4.33307	4.07472	3.55286	5.136	1.58314	6.76371	3.12598	0.406928	0.00111857	-0.100373	1.19325	0.901353	Rv0071	708	1	0.0765957	0.00425532	0.0851064	0.0468085	0.0340426	0.0553191	0.0255319	0.0680851	0.0340426	0.0723404	0.00851064	0.0212766	0.0808511	0.0255319	0.119149	0.0340426	0.0595745	0.102128	0.0297872	0.0170213	0.177966	0.313559	0.175141	0.333333	0.646893	0.488701	0.1294	0.4726	0.0934	0.5301	0.214
Rv0072	4.33776	9.81859	0.924574	8.0423	8.16507	7.589	8.70618	1.11718	6.78874	4.86841	-1.1055	0	-0.00201106	0.926585	0.999715	Rv0072	1050	1	0.123209	0	0.0315186	0.0286533	0.0401146	0.100287	0.00859599	0.0630372	0.0229226	0.106017	0.0315186	0.0229226	0.0659026	0.0229226	0.0630372	0.0544413	0.0544413	0.143266	0.00573066	0.0114613	0.158095	0.282857	0.224762	0.334286	0.617143	0.507619	0.1742	0.3839	0.1284	0.4562	0.198
Rv0073	2.6817	10.2004	1.06616	8.11384	8.39411	7.72731	8.82392	1.09661	6.78602	8.26368	-1.97776	0	0.138096	0.928067	1.13982	Rv0073	993	1	0.1	0.00606061	0.0545455	0.0787879	0.030303	0.0939394	0.0212121	0.0424242	0.0151515	0.124242	0.0242424	0.0333333	0.0454545	0.030303	0.0848485	0.0484848	0.0424242	0.10303	0	0.0212121	0.181269	0.27996	0.192346	0.346425	0.626385	0.472306	0.1738	0.4184	0.1157	0.4921	0.26
Rv0074	2.74655	8.47016	0.900633	6.98866	7.22075	6.67264	7.57837	0.90573	6.78659	6.65152	-1.71786	0	-0.0295702	0.930203	0.972156	Rv0074	1236	1	0.155718	0.0170316	0.0754258	0.0389294	0.0170316	0.111922	0.0291971	0.0340633	0.00973236	0.080292	0.0145985	0.00973236	0.0559611	0.0316302	0.0729927	0.053528	0.0486618	0.107056	0.0170316	0.0194647	0.156149	0.295307	0.183657	0.364887	0.660194	0.478964	0.2027	0.4082	0.1216	0.4286	0.258
Rv0075	3.34671	9.30337	0.808695	7.00782	7.07089	6.56264	7.52546	0.962813	6.78874	5.10169	-0.860215	0	-0.120914	0.929609	0.880812	Rv0075	1173	1	0.135897	0.0128205	0.0641026	0.0564103	0.0333333	0.0641026	0.0205128	0.0435897	0.0128205	0.102564	0.0205128	0.0358974	0.0717949	0.0205128	0.0769231	0.0461538	0.0333333	0.0974359	0.025641	0.025641	0.161125	0.303495	0.197783	0.337596	0.641091	0.501279	0.1602	0.4214	0.1145	0.5071	0.286
Rv0076c	2.57907	11.9727	1.65554	6.39994	6.35727	5.08107	7.52753	2.44646	6.76321	3.89738	0.73326	0	0.693171	0.962369	1.6949	Rv0076c	390	0	0.116279	0.0155039	0.0232558	0.0465116	0.0465116	0.0465116	0.0542636	0.0387597	0.0387597	0.139535	0.0155039	0.0232558	0.0542636	0.0620155	0.100775	0.0387597	0.0465116	0.0697674	0.0155039	0.00775194	0.197436	0.338462	0.179487	0.284615	0.623077	0.517949	0.1132	0.5	0.1748	0.4286	0.251
Rv0077c	2.10279	13.5072	1.949	5.3387	5.00719	4.28865	5.82094	1.5323	6.73832	8.22909	2.04353	0	0.881472	1.06753	1.8832	Rv0077c	831	0	0.144928	0.00724638	0.0507246	0.0434783	0.0326087	0.0724638	0.0289855	0.0507246	0.0181159	0.105072	0.0181159	0.0181159	0.0688406	0.0253623	0.0833333	0.0471014	0.0652174	0.0905797	0.0144928	0.0144928	0.160048	0.352587	0.178099	0.309266	0.661853	0.530686	0.1399	0.5062	0.1156	0.3981	0.234
Rv0078	0	8.72818	1.22589	5.03753	5.15435	4.22291	5.84451	1.6216	6.76325	3.67956	-0.382525	0.00223714	0.118216	1.10767	1.11994	Rv0078	606	1	0.174129	0	0.0597015	0.0746269	0.0199005	0.0746269	0.00497512	0.0497512	0.0199005	0.0945274	0.0348259	0.00497512	0.0348259	0.0497512	0.109453	0.0199005	0.0597015	0.0845771	0.0149254	0.0149254	0.168317	0.30198	0.151815	0.377888	0.679868	0.453795	0.1049	0.4506	0.1059	0.5188	0.247
Rv0078A	5.57511	10.1758	0.73446	8.09942	8.09746	7.64668	8.59545	0.948774	6.79156	3.42435	-0.126748	0	-0.193287	0.927747	0.80844	Rv0078A	594	0	0.182741	0.00507614	0.0964467	0.0609137	0.0203046	0.0304569	0.0152284	0.0456853	0.0203046	0.121827	0.0101523	0.0152284	0.0304569	0.0406091	0.106599	0.0406091	0.0507614	0.0862944	0.0152284	0.00507614	0.190236	0.291246	0.198653	0.319865	0.611111	0.489899	0.25	0.3571	0.1801	0.4013	0.248
Rv0078B	4.02148	12.1236	1.04501	8.56818	8.55722	7.8448	9.22145	1.37665	6.78826	3.57342	0.155872	0	0.104266	0.940744	1.10599	Rv0078B	207	0	0.147059	0	0.0588235	0.102941	0.0147059	0.0735294	0	0.0294118	0.0147059	0.0588235	0.0735294	0.0147059	0.0441176	0.0441176	0.117647	0.0441176	0.0588235	0.0735294	0.0147059	0.0147059	0.202899	0.246377	0.173913	0.376812	0.623188	0.42029	0.25	0.3269	0.1429	0.463	0.283
Rv0079	3.0392	12.9406	2.2373	7.83407	7.71704	5.96331	9.51765	3.55434	6.75477	2.18576	0.255681	0	1.3133	0.924002	2.31503	Rv0079	822	1	0.142857	0.014652	0.0659341	0.032967	0.025641	0.0805861	0.018315	0.025641	0.00732601	0.0952381	0.014652	0.018315	0.0915751	0.03663	0.124542	0.032967	0.0622711	0.0842491	0.010989	0.014652	0.153285	0.339416	0.16545	0.341849	0.681265	0.504866	0.1423	0.4065	0.1518	0.4516	0.226
Rv0080	0.40674	12.1726	2.17487	7.02957	6.48062	5.44126	8.82559	3.38434	6.74721	2.55626	0.329412	0	1.2459	0.928971	2.24763	Rv0080	459	1	0.118421	0	0.0723684	0.0526316	0.00657895	0.0526316	0.0197368	0.0394737	0.00657895	0.0657895	0.0263158	0.0131579	0.0592105	0.0197368	0.125	0.0723684	0.0592105	0.164474	0.0131579	0.0131579	0.145969	0.313725	0.165577	0.374728	0.688453	0.479303	0.1418	0.4552	0.0551	0.4876	0.234
Rv0081	0	10.3126	1.75616	5.94016	6.10571	4.72256	7.28691	2.56435	6.74689	2.83831	-0.414875	0.00447427	0.753873	1.00229	1.7556	Rv0081	345	1	0.140351	0	0.0526316	0.0789474	0.0175439	0.0614035	0.00877193	0.0438596	0.0350877	0.157895	0.0175439	0.0175439	0.0263158	0.0175439	0.105263	0.0877193	0.0175439	0.0964912	0	0.0175439	0.150725	0.289855	0.194203	0.365217	0.655072	0.484058	0.1327	0.3878	0.07	0.5789	0.232
Rv0082	0	10.0487	1.72695	5.79997	5.77749	4.65715	6.9839	2.32675	6.74874	2.62655	-0.0691905	0.00111857	0.711144	1.0158	1.71287	Rv0082	480	1	0.163522	0.0314465	0.0377358	0.0503145	0.0251572	0.113208	0.0188679	0.0440252	0.0188679	0.0566038	0.0188679	0.0188679	0.0880503	0.00628931	0.0754717	0.0314465	0.0377358	0.144654	0.00628931	0.0125786	0.129167	0.30625	0.172917	0.391667	0.697917	0.479167	0.1119	0.4196	0.0985	0.528	0.199
Rv0083	0	9.60033	1.48908	4.79154	4.70919	3.78974	5.77469	1.98495	6.74348	3.30808	-0.00467332	0.00111857	0.351034	1.13805	1.35276	Rv0083	1923	1	0.198437	0.0078125	0.021875	0.0234375	0.034375	0.104688	0.0203125	0.0328125	0.0078125	0.1375	0.0359375	0.003125	0.053125	0.015625	0.0625	0.0421875	0.053125	0.110937	0.0140625	0.0203125	0.103484	0.332293	0.184607	0.379615	0.711908	0.516901	0.0882	0.4325	0.0594	0.5309	0.272
Rv0084	1.05823	9.61887	1.04118	6.41998	6.45749	5.84245	7.06926	1.22681	6.78138	6.20507	-0.846778	0	0.0802743	0.960901	1.082	hycD	951	1	0.183544	0	0.0221519	0.0316456	0.0411392	0.0981013	0.0126582	0.0537975	0.0126582	0.167722	0.0221519	0.0126582	0.0506329	0.0189873	0.0348101	0.0316456	0.0727848	0.113924	0.0126582	0.00632911	0.129338	0.333333	0.185068	0.352261	0.685594	0.518402	0.0561	0.4561	0.0982	0.5116	0.253
Rv0085	0	8.96093	1.35424	5.07272	4.98879	4.21624	6.0903	1.87406	6.75538	3.8885	-0.331805	0.00671141	0.251188	1.10305	1.25291	hycP	663	1	0.186364	0	0.0454545	0.0227273	0.0409091	0.0681818	0.00454545	0.0727273	0.00454545	0.177273	0.0136364	0.0318182	0.0318182	0.0181818	0.0727273	0.0318182	0.0545455	0.109091	0.0136364	0	0.117647	0.330317	0.193062	0.358974	0.689291	0.523379	0.0637	0.4559	0.0428	0.5848	0.299
Rv0086	0.395357	8.72759	1.07464	5.75618	5.7968	5.09211	6.4848	1.39269	6.7767	5.05842	-0.622986	0	0.0545847	1.02006	1.05631	hycQ	1467	1	0.20082	0.00819672	0.0245902	0.0143443	0.0286885	0.106557	0.0204918	0.067623	0.00819672	0.163934	0.0286885	0.0143443	0.0307377	0.00819672	0.0430328	0.0471311	0.0696721	0.0881148	0.0122951	0.0143443	0.119291	0.335378	0.191547	0.353783	0.689162	0.526926	0.0861	0.4614	0.058	0.5144	0.285
Rv0087	1.553	7.97398	1.11661	4.91283	4.85826	4.14765	5.7816	1.63395	6.7691	2.54496	-0.0779097	0	-0.00688336	1.12349	0.994843	hycE	1479	1	0.148374	0.00203252	0.0630081	0.0589431	0.0325203	0.0772358	0.046748	0.0487805	0.0101626	0.105691	0.0101626	0.0223577	0.0630081	0.00813008	0.0873984	0.046748	0.0406504	0.0853659	0.0162602	0.0264228	0.161596	0.361055	0.170385	0.306964	0.668019	0.53144	0.1244	0.5724	0.1169	0.3518	0.265
Rv0088	5.51084	10.5972	0.82253	8.02915	8.04913	7.48405	8.56534	1.08129	6.79042	2.83631	-0.0783628	0	-0.103813	0.926343	0.897913	Rv0088	675	1	0.0982143	0	0.03125	0.0535714	0.03125	0.0982143	0.0223214	0.0267857	0.0625	0.0758929	0.0223214	0.0178571	0.0535714	0.0133929	0.102679	0.0758929	0.0714286	0.09375	0.0223214	0.0267857	0.202963	0.274074	0.179259	0.343704	0.617778	0.453333	0.1505	0.4032	0.1667	0.45	0.214
Rv0089	1.72001	8.70766	0.85091	6.20122	6.32031	5.73806	6.72253	0.984476	6.78572	5.51703	-0.789396	0	-0.127487	0.978397	0.87424	Rv0089	594	1	0.126904	0.0203046	0.0507614	0.0203046	0.0152284	0.071066	0.0406091	0.0406091	0.0152284	0.126904	0.0203046	0.035533	0.071066	0.0203046	0.0862944	0.0304569	0.0659898	0.0913706	0.035533	0.0152284	0.151515	0.341751	0.178451	0.328283	0.670034	0.520202	0.1307	0.4773	0.0789	0.4722	0.238
Rv0090	0	8.13084	0.990812	4.18192	4.04071	3.56658	4.7123	1.14572	6.76753	5.78408	0.769677	0.00223714	-0.220729	1.21154	0.780997	Rv0090	771	1	0.15625	0.0117188	0.0390625	0.046875	0.0273438	0.09375	0.0117188	0.0507812	0.0351562	0.140625	0.0195312	0.015625	0.0273438	0.0273438	0.0976562	0.0195312	0.0507812	0.0859375	0.0234375	0.0195312	0.14786	0.289235	0.19585	0.367056	0.656291	0.485084	0.1422	0.4358	0.0794	0.5124	0.251
Rv0091	1.63587	7.41005	0.936525	5.61471	5.72026	5.01077	6.25156	1.24079	6.78101	3.64297	-0.617783	0	-0.0976112	1.03414	0.904115	mtn	768	1	0.109804	0.0235294	0.0666667	0.0392157	0.0352941	0.109804	0.027451	0.0588235	0.0117647	0.117647	0.0156863	0.0117647	0.0470588	0.0392157	0.0784314	0.027451	0.054902	0.0980392	0.00392157	0.0235294	0.15625	0.330729	0.192708	0.320312	0.651042	0.523438	0.1498	0.5242	0.1089	0.4011	0.267
Rv0092	2.33731	9.03822	0.623916	6.20912	6.23474	5.91642	6.50861	0.592193	6.79043	9.12076	-0.788419	0	-0.3538	0.977716	0.647927	ctpA	2286	1	0.18134	0.0118265	0.0565046	0.0341656	0.0275953	0.088042	0.0170828	0.0459921	0.0183968	0.0854139	0.0249671	0.0144547	0.0394218	0.0302234	0.0696452	0.0591327	0.0591327	0.114323	0.0131406	0.00919842	0.155293	0.328084	0.169291	0.347332	0.675416	0.497375	0.1091	0.4978	0.121	0.4216	0.233
Rv0093c	1.09025	9.17066	0.751762	5.84718	5.75408	5.47806	6.17542	0.697358	6.78691	11.178	-0.381978	0	-0.259463	1.01123	0.742263	Rv0093c	849	0	0.156028	0.0212766	0.0390071	0.0319149	0.0141844	0.0992908	0.035461	0.0460993	0	0.0921986	0.0212766	0.0106383	0.0638298	0.0283688	0.0921986	0.0673759	0.0602837	0.0886525	0.0283688	0.0035461	0.140165	0.32391	0.183746	0.352179	0.67609	0.507656	0.1706	0.4127	0.1239	0.4208	0.234
Rv0095c	0	11.553	1.32903	4.32099	4.05514	3.5875	4.75185	1.16436	6.74934	8.64659	1.5177	0.00894855	0.13432	1.19471	1.13605	Rv0095c	411	0	0.102941	0.0294118	0.0514706	0.0955882	0.0367647	0.0294118	0.0147059	0.0294118	0.0147059	0.147059	0.0147059	0.0367647	0.0441176	0.0220588	0.117647	0.0808824	0.0514706	0.0588235	0.00735294	0.0147059	0.189781	0.304136	0.194647	0.311436	0.615572	0.498783	0.1638	0.4569	0.1468	0.4381	0.226
Rv0096	0	7.67067	1.31281	3.46188	3.13685	2.52439	4.20994	1.68555	6.72571	3.35806	0.772988	0.00223714	0.0136605	1.29915	1.01539	PPE1	1392	1	0.205184	0.00647948	0.0388769	0.0259179	0.0280778	0.0842333	0.0172786	0.0323974	0.00863931	0.105832	0.0107991	0.0237581	0.0863931	0.0431965	0.0237581	0.0734341	0.0777538	0.0604752	0.0151188	0.0323974	0.172414	0.365661	0.176724	0.285201	0.650862	0.542385	0.1735	0.5108	0.1488	0.2989	0.252
Rv0097	2.08678	10.3366	1.09323	5.72698	5.51894	5.06117	6.28519	1.22402	6.778	4.21558	0.779101	0	0.0703322	1.0229	1.07206	Rv0097	870	1	0.0553633	0.00346021	0.0726644	0.0553633	0.0276817	0.0761246	0.0449827	0.0761246	0.0519031	0.0692042	0.0276817	0.017301	0.0865052	0.0346021	0.0553633	0.0311419	0.083045	0.0726644	0.017301	0.0415225	0.236782	0.314943	0.174713	0.273563	0.588506	0.489655	0.166	0.5191	0.1574	0.4175	0.251
Rv0098	0	9.93326	1.07991	5.28355	5.18408	4.72175	5.78772	1.06598	6.7746	5.25778	0.513802	0.00111857	0.00508532	1.07482	1.00681	fcoT	552	1	0.0983607	0.0382514	0.0382514	0.0710383	0.0382514	0.0491803	0.0163934	0.0655738	0.0273224	0.114754	0.010929	0.0382514	0.0437158	0.0327869	0.0710383	0.0874317	0.0437158	0.0546448	0.0163934	0.0437158	0.210145	0.317029	0.199275	0.273551	0.59058	0.516304	0.1364	0.5455	0.1583	0.4016	0.275
Rv0099	2.78793	8.90922	0.878072	5.57876	5.48391	5.07565	6.03363	0.957984	6.78349	4.33211	0.556391	0	-0.159986	1.03806	0.84174	fadD10	1623	1	0.138889	0.0185185	0.0462963	0.062963	0.0222222	0.0925926	0.00925926	0.0574074	0.0259259	0.0925926	0.0185185	0.0240741	0.0537037	0.0203704	0.0592593	0.0685185	0.0703704	0.087037	0.012963	0.0185185	0.179298	0.300062	0.194085	0.326556	0.626617	0.494147	0.1789	0.4375	0.1384	0.4197	0.249
Rv0100	0	8.54242	1.26145	4.95376	4.96237	4.23693	5.78975	1.55282	6.75641	5.10999	-0.63431	0.0134228	0.143035	1.11842	1.14476	Rv0100	237	1	0.0897436	0.025641	0.115385	0.0769231	0.025641	0.0641026	0	0.0512821	0.0128205	0.166667	0.025641	0.025641	0.025641	0.025641	0.0897436	0.0512821	0.025641	0.0769231	0.0128205	0.0128205	0.168776	0.274262	0.227848	0.329114	0.603376	0.50211	0.209	0.4179	0.1167	0.4821	0.25
Rv0101	2.43296	7.90255	1.0299	5.19944	5.05051	4.48829	6.02367	1.53539	6.77604	2.67085	0.211639	0	-0.056195	1.0861	0.945531	nrp	7539	1	0.133758	0.0127389	0.0696656	0.0457803	0.0274682	0.0816083	0.0199045	0.0417994	0.0151274	0.109475	0.0131369	0.0226911	0.0609076	0.0270701	0.0796178	0.0525478	0.0573248	0.0931529	0.0155255	0.0207006	0.162488	0.3076	0.186364	0.343547	0.651147	0.493965	0.155	0.4239	0.1137	0.4882	0.24
Rv0102	4.94622	8.35339	0.57525	6.91827	6.94612	6.57698	7.33957	0.762597	6.79218	3.50116	-0.582284	0	-0.357413	0.932663	0.644313	Rv0102	1986	1	0.15885	0.00907716	0.03177	0.02118	0.0484115	0.0922844	0.0272315	0.0453858	0.00453858	0.119516	0.0347958	0.01059	0.0529501	0.01059	0.065053	0.0544629	0.0620272	0.0983359	0.0257186	0.0272315	0.132427	0.311682	0.217019	0.338872	0.650554	0.528701	0.1491	0.4154	0.1079	0.4663	0.249
Rv0103c	4.38263	9.78501	0.52133	7.15486	7.20187	6.96487	7.43368	0.468802	6.79298	7.31583	-0.839182	0	-0.404642	0.925972	0.597084	ctpB	2259	0	0.178191	0.00930851	0.0545213	0.037234	0.0279255	0.0930851	0.0146277	0.0478723	0.0226064	0.0890957	0.0239362	0.018617	0.0385638	0.018617	0.0678191	0.0571809	0.0611702	0.119681	0.0106383	0.00930851	0.157149	0.315184	0.181939	0.345728	0.660912	0.497123	0.1407	0.4701	0.123	0.4102	0.23
Rv0104	0	7.22694	1.49392	4.30834	4.19153	2.95892	5.5281	2.56918	6.73385	1.9434	0.138884	0.00111857	0.297677	1.19624	1.2994	Rv0104	1515	1	0.136905	0.015873	0.0813492	0.0357143	0.031746	0.0892857	0.0277778	0.0555556	0.00992063	0.111111	0.0297619	0.015873	0.0396825	0.0178571	0.0714286	0.0694444	0.0535714	0.0793651	0.00396825	0.0238095	0.158416	0.327393	0.2033	0.310891	0.638284	0.530693	0.1601	0.5088	0.1028	0.3961	0.241
Rv0106	2.29326	11.9821	2.01032	5.78134	5.29891	4.59191	6.23683	1.64493	6.74127	4.50728	1.40999	0	0.992708	1.01761	1.99443	Rv0106	1197	1	0.115578	0.0201005	0.0854271	0.0502513	0.0226131	0.0728643	0.0427136	0.0226131	0.00251256	0.113065	0.0201005	0.0150754	0.0603015	0.0226131	0.0979899	0.0351759	0.0552764	0.113065	0.0226131	0.0100503	0.157895	0.314954	0.177945	0.349206	0.66416	0.492899	0.1282	0.4359	0.1485	0.4694	0.257
Rv0107c	4.55693	9.07952	0.625766	6.69472	6.68134	6.36666	7.08082	0.714159	6.79131	3.46385	-0.0372598	0	-0.317651	0.943417	0.684076	ctpI	4899	0	0.17402	0.00367647	0.0606618	0.0453431	0.0110294	0.0821078	0.0226716	0.0349265	0.00857843	0.103554	0.0147059	0.0159314	0.0631127	0.033701	0.0821078	0.0545343	0.067402	0.103554	0.0128676	0.00551471	0.156154	0.335579	0.157379	0.350888	0.686467	0.492958	0.126	0.4367	0.1328	0.4416	0.24
Rv0108c	6.40058	14.2343	1.2442	10.4677	10.6029	9.64953	11.3053	1.65579	6.78848	3.33511	-0.403141	0	0.240776	1.00343	1.2425	Rv0108c	210	0	0.0289855	0.0144928	0.0434783	0.0724638	0.0144928	0.101449	0.0724638	0.057971	0.0289855	0.0869565	0.0144928	0.0289855	0.0434783	0.0434783	0.057971	0.0724638	0.0434783	0.144928	0	0.0289855	0.190476	0.295238	0.2	0.314286	0.609524	0.495238	0.1356	0.5593	0.0545	0.4902	0.272
Rv0109	1.32203	8.47708	0.790826	4.59061	4.51324	4.18146	4.92308	0.741621	6.7814	8.81303	1.25435	0	-0.371359	1.16219	0.630367	PE_PGRS1	1491	1	0.147177	0.00201613	0.0262097	0.00806452	0.0322581	0.391129	0.00604839	0.0302419	0	0.0665323	0.016129	0.0645161	0.0342742	0.0282258	0.0100806	0.0443548	0.0423387	0.0423387	0	0.00806452	0.131455	0.29108	0.142857	0.434608	0.725687	0.433937	0.1681	0.5255	0.0907	0.3069	0.306
Rv0110	1.53737	7.73827	0.854865	5.90333	6.01078	5.42057	6.51552	1.09495	6.78432	6.13479	-1.13609	0	-0.150947	1.00581	0.850779	Rv0110	750	1	0.128514	0.00803213	0.00803213	0.0200803	0.0441767	0.0963855	0.0200803	0.0321285	0	0.144578	0.0281124	0.0240964	0.0441767	0.0321285	0.0763052	0.0361446	0.0682731	0.13253	0.0240964	0.0321285	0.125333	0.282667	0.225333	0.366667	0.649333	0.508	0.139	0.3587	0.0743	0.567	0.236
Rv0111	1.50762	7.74653	1.06063	5.63613	5.7578	5.14665	6.33521	1.18857	6.77616	4.66176	-1.00165	0	0.0287462	1.03188	1.03047	Rv0111	2058	1	0.127007	0.00875912	0.0394161	0.0277372	0.0321168	0.0934307	0.0160584	0.0481752	0.010219	0.108029	0.0145985	0.0189781	0.0686131	0.0262774	0.0948905	0.0540146	0.0569343	0.0978102	0.0379562	0.0189781	0.145287	0.310496	0.197765	0.346453	0.656948	0.50826	0.1634	0.4092	0.1201	0.4495	0.219
Rv0112	3.42234	11.8063	1.02191	7.27798	7.31693	6.74671	7.7594	1.01269	6.78567	4.83677	-0.0422557	0	0.097987	0.923928	1.09971	gca	957	1	0.106918	0.0220126	0.072327	0.0503145	0.0251572	0.0660377	0.0283019	0.0597484	0.0408805	0.072327	0.0377358	0.0220126	0.0471698	0.0251572	0.0628931	0.0566038	0.0597484	0.0849057	0.0188679	0.0408805	0.222571	0.273772	0.218391	0.285266	0.559039	0.492163	0.2548	0.4183	0.206	0.3505	0.26
Rv0113	3.11713	11.481	1.07339	7.18986	7.25657	6.60817	7.80615	1.19798	6.7841	4.44712	-0.459879	0	0.148077	0.925312	1.1498	gmhA	591	1	0.163265	0.0102041	0.0510204	0.0663265	0.0510204	0.0816327	0.0408163	0.0612245	0.0102041	0.0816327	0.0204082	0.0306122	0.0255102	0.0204082	0.0765306	0.0612245	0.0663265	0.0663265	0	0.0153061	0.203046	0.287648	0.218274	0.291032	0.57868	0.505922	0.2586	0.4023	0.2013	0.331	0.263
Rv0114	2.26671	9.04538	1.02244	6.1791	6.32084	5.68625	6.7522	1.06595	6.78105	4.62717	-0.794647	0	0.0421201	0.98032	1.04385	gmhB	573	1	0.121053	0.0263158	0.0631579	0.0315789	0.0263158	0.110526	0.0421053	0.0315789	0.0157895	0.0947368	0.0210526	0.0210526	0.0368421	0.0526316	0.0789474	0.0631579	0.00526316	0.115789	0.0315789	0.0105263	0.17801	0.263525	0.205934	0.352531	0.616056	0.469459	0.2112	0.3975	0.1944	0.3913	0.179
Rv0115	1.62891	8.13094	0.933756	5.59278	5.69104	5.11072	6.1596	1.04889	6.78083	4.60269	-0.704956	0	-0.102753	1.03651	0.898973	hddA	1161	1	0.126943	0.015544	0.0492228	0.0595855	0.0336788	0.11399	0.015544	0.0492228	0.015544	0.0958549	0.0207254	0.0181347	0.0492228	0.0259067	0.0777202	0.0777202	0.0388601	0.0829016	0.0129534	0.0207254	0.170543	0.298019	0.199828	0.331611	0.62963	0.497847	0.1796	0.4281	0.1783	0.3864	0.216
Rv0115a	2.84342	13.8671	1.56672	7.45921	7.36241	6.52958	8.26362	1.73405	6.77376	3.953	0.451451	0	0.644321	0.9224	1.64605	Rv0115a	189	1	0.129032	0	0.0483871	0.016129	0.0322581	0.016129	0	0.0483871	0.016129	0.0645161	0.0645161	0	0.0645161	0.0322581	0.177419	0.0322581	0.129032	0.0967742	0.016129	0.016129	0.169312	0.285714	0.201058	0.343915	0.62963	0.486772	0.2453	0.2264	0.1176	0.5417	0.241
Rv0116c	5.29237	11.5621	0.916852	7.43545	7.2761	6.85742	7.88136	1.02394	6.78833	4.86171	0.960243	0	-0.00563267	0.922485	0.996094	ldtA	756	0	0.0916335	0.00398406	0.0278884	0.0358566	0.0239044	0.0717131	0.0398406	0.0478088	0.00796813	0.0478088	0.0199203	0.0358566	0.0756972	0.0119522	0.063745	0.0996016	0.0876494	0.155378	0.0239044	0.0278884	0.178571	0.329365	0.189153	0.30291	0.632275	0.518519	0.1416	0.4956	0.13	0.3723	0.252
Rv0117	2.0155	9.01508	0.878327	5.6031	5.62349	5.09439	6.17396	1.07957	6.78287	5.56027	-0.344707	0	-0.157058	1.03539	0.844668	oxyS	945	1	0.149682	0.0127389	0.0477707	0.0636943	0.0350318	0.044586	0.022293	0.0382166	0.0191083	0.121019	0.0159236	0.0159236	0.0509554	0.0414013	0.0732484	0.0605096	0.066879	0.089172	0.0159236	0.0159236	0.166138	0.304762	0.197884	0.331217	0.635979	0.502646	0.1617	0.3722	0.1318	0.5244	0.241
Rv0118c	3.08382	8.87984	0.944767	5.85017	5.75968	5.28791	6.41456	1.12666	6.78264	3.33613	0.21663	0	-0.0661706	1.01094	0.935556	oxcA	1749	0	0.156357	0.0103093	0.0652921	0.0378007	0.0257732	0.0910653	0.0223368	0.0532646	0.0154639	0.0893471	0.0223368	0.0360825	0.0601375	0.0257732	0.0704467	0.0670103	0.04811	0.0721649	0.0103093	0.0206186	0.173242	0.343053	0.160091	0.323613	0.666667	0.503145	0.1161	0.5164	0.1201	0.4239	0.276
Rv0119	1.50173	7.99571	0.91263	5.39036	5.36306	4.80252	5.99781	1.19529	6.78114	3.39327	0.0161678	0	-0.148185	1.06081	0.853542	fadD7	1578	1	0.139048	0.00571429	0.047619	0.0533333	0.0266667	0.0933333	0.0247619	0.0495238	0.0114286	0.0952381	0.0152381	0.0133333	0.0704762	0.0247619	0.0761905	0.0647619	0.08	0.0857143	0.0133333	0.00952381	0.15526	0.350444	0.159062	0.335234	0.685678	0.509506	0.108	0.4989	0.1038	0.4388	0.261
Rv0120c	3.24659	8.89147	0.753263	6.39777	6.32681	5.95644	6.84061	0.884177	6.78881	4.33408	0.356768	0	-0.209266	0.962529	0.79246	fusA2	2145	0	0.116246	0.0112045	0.0630252	0.0756303	0.0308123	0.0994398	0.0238095	0.0420168	0.0336134	0.092437	0.012605	0.0168067	0.057423	0.0280112	0.0588235	0.0588235	0.0588235	0.0980392	0.00420168	0.0182073	0.175291	0.316084	0.165501	0.343124	0.659207	0.481585	0.101	0.5182	0.1043	0.4811	0.257
Rv0121c	0	8.56884	0.860475	5.58076	5.54294	5.14956	6.0986	0.949036	6.78277	6.866	-0.624846	0.00111857	-0.17736	1.03783	0.824366	Rv0121c	435	0	0.166667	0	0.0625	0.0277778	0.0208333	0.0486111	0.0277778	0.0277778	0.0277778	0.0833333	0.0138889	0.0208333	0.0625	0.0416667	0.104167	0.0416667	0.0555556	0.0972222	0.0347222	0.0347222	0.181609	0.344828	0.156322	0.317241	0.662069	0.501149	0.121	0.5242	0.1491	0.3727	0.213
Rv0122	0	9.10677	1.36463	5.56762	5.51766	4.59205	6.52387	1.93182	6.76409	2.97307	-0.044764	0.00223714	0.325323	1.0393	1.32705	Rv0122	369	1	0.0901639	0.0163934	0.057377	0.057377	0	0.0819672	0.0491803	0.0409836	0.0327869	0.0409836	0.0245902	0.0245902	0.0245902	0.0327869	0.122951	0.0409836	0.0819672	0.131148	0.0163934	0.0327869	0.205962	0.289973	0.176152	0.327913	0.617886	0.466125	0.1845	0.4854	0.1354	0.3956	0.21
Rv0123	0.899912	10.0436	1.00652	5.95399	5.93142	5.28762	6.56018	1.27256	6.78127	4.11386	0.2091	0	0.00554989	1.00097	1.00728	Rv0123	369	1	0.0737705	0	0.0655738	0.0983607	0.00819672	0.057377	0.0163934	0.0245902	0.0737705	0.0983607	0.0245902	0.0163934	0.0491803	0.0327869	0.106557	0.0901639	0.0327869	0.114754	0	0.0163934	0.203252	0.284553	0.176152	0.336043	0.620596	0.460705	0.2021	0.4255	0.1154	0.4752	0.241
Rv0124	0	8.43945	1.37979	3.45604	3.33962	2.76654	4.00437	1.23783	6.71133	5.04088	0.684615	0.00447427	0.0799216	1.29987	1.08165	PE_PGRS2	1464	1	0.199179	0	0.0287474	0.00821355	0.0143737	0.396304	0.0225873	0.0287474	0	0.0574949	0.00616016	0.0328542	0.0287474	0.0410678	0.0102669	0.0349076	0.0287474	0.0410678	0.0102669	0.0102669	0.108607	0.31694	0.114754	0.459699	0.776639	0.431694	0.1385	0.5648	0.0775	0.3058	0.287
Rv0125	4.47376	11.1531	0.693506	8.54004	8.52505	8.11464	8.90097	0.786334	6.79235	8.40459	-0.322591	0	-0.246443	0.939949	0.755284	pepA	1068	1	0.135211	0	0.0478873	0.0112676	0.0197183	0.16338	0.0112676	0.0478873	0.0056338	0.0704225	0.0169014	0.056338	0.0619718	0.056338	0.0366197	0.0676056	0.0619718	0.112676	0.0084507	0.0084507	0.15824	0.329588	0.161049	0.351124	0.680712	0.490637	0.1219	0.5188	0.078	0.4245	0.255
Rv0126	5.04258	8.99542	0.595304	7.4821	7.5027	7.16502	7.86951	0.704491	6.7925	3.72061	-0.387925	0	-0.327043	0.922346	0.674684	treS	1806	1	0.0665557	0.00831947	0.0865225	0.0615641	0.0582363	0.0765391	0.0299501	0.0415973	0.0116473	0.0865225	0.0216306	0.0349418	0.0765391	0.0349418	0.0765391	0.0415973	0.046589	0.0748752	0.0232945	0.0415973	0.182171	0.329457	0.188815	0.299557	0.629014	0.518272	0.1257	0.5678	0.11	0.4453	0.309
Rv0127	4.55352	8.37283	0.567189	7.15042	7.26177	6.89019	7.52566	0.635474	6.79245	4.74802	-1.10845	0	-0.358872	0.92606	0.642855	mak	1368	1	0.131868	0.00659341	0.0681319	0.0659341	0.032967	0.0725275	0.0153846	0.0263736	0.0153846	0.103297	0.00879121	0.0197802	0.0527473	0.032967	0.0857143	0.0571429	0.0637363	0.0857143	0.0175824	0.0373626	0.171784	0.323099	0.171784	0.333333	0.656433	0.494883	0.133	0.4706	0.133	0.4556	0.252
Rv0128	2.78971	8.86435	0.864681	6.57471	6.54675	6.05289	7.09456	1.04167	6.78686	3.8707	-0.240787	0	-0.0857959	0.950477	0.915931	Rv0128	780	1	0.119691	0.00772201	0.034749	0.027027	0.0617761	0.119691	0.030888	0.03861	0.019305	0.108108	0.030888	0.015444	0.030888	0.023166	0.0501931	0.0656371	0.0694981	0.100386	0.019305	0.027027	0.162821	0.278205	0.221795	0.337179	0.615385	0.5	0.1485	0.4192	0.1443	0.4607	0.196
Rv0129c	4.51934	12.3034	1.27587	9.50667	9.66654	8.79557	10.4123	1.61677	6.78623	4.20032	-0.839597	0	0.309053	0.96682	1.31078	fbpC	1023	0	0.111765	0.00294118	0.0411765	0.0264706	0.0411765	0.111765	0.00882353	0.0294118	0.0176471	0.0794118	0.0294118	0.0617647	0.0823529	0.05	0.0441176	0.0676471	0.0588235	0.0529412	0.0323529	0.05	0.181818	0.339198	0.168133	0.31085	0.650049	0.507331	0.101	0.5575	0.0884	0.4519	0.319
Rv0130	0	7.62219	0.939056	5.70414	5.79249	5.15148	6.37295	1.22147	6.7808	5.12961	-0.93561	0.00111857	-0.0860622	1.02512	0.915664	htdZ	456	1	0.13245	0.00662252	0.0397351	0.0596026	0.0331126	0.0860927	0.0264901	0.0331126	0.0331126	0.0662252	0.0198675	0.0264901	0.0463576	0.0397351	0.0463576	0.0529801	0.0860927	0.13245	0.013245	0.0198675	0.182018	0.324561	0.157895	0.335526	0.660088	0.482456	0.0873	0.5556	0.0976	0.4492	0.308
Rv0131c	3.77851	8.41505	0.622256	5.81615	5.82661	5.38125	6.19883	0.817583	6.78999	3.31148	0.164429	0	-0.391977	1.01423	0.60975	fadE1	1344	0	0.116331	0.00671141	0.0581655	0.0626398	0.0357942	0.0715884	0.0402685	0.0514541	0.0380313	0.0917226	0.0380313	0.01566	0.0469799	0.0514541	0.082774	0.0380313	0.0536913	0.0604027	0.0201342	0.0201342	0.19122	0.326637	0.15997	0.322173	0.64881	0.486607	0.0963	0.5467	0.1053	0.4953	0.313
Rv0132c	1.12445	7.67442	0.953099	4.89528	4.9192	4.26462	5.56192	1.29731	6.77633	3.10588	-0.0215764	0	-0.17252	1.12562	0.829207	fgd2	1083	0	0.147222	0.00555556	0.0555556	0.0416667	0.05	0.105556	0.025	0.0472222	0.0138889	0.0833333	0.00833333	0.0277778	0.0638889	0.0416667	0.0694444	0.0444444	0.0666667	0.0611111	0.0194444	0.0222222	0.165282	0.361034	0.156048	0.317636	0.67867	0.517082	0.1048	0.5937	0.0954	0.3872	0.275
Rv0133	4.31406	10.957	0.75875	7.71049	7.75767	7.38799	8.08752	0.699522	6.79077	7.58247	-0.227114	0	-0.164288	0.923038	0.837439	Rv0133	606	1	0.129353	0.00995025	0.0547264	0.0497512	0.039801	0.0746269	0.0248756	0.0199005	0.00995025	0.079602	0.039801	0.0149254	0.079602	0.0348259	0.139303	0.0348259	0.0497512	0.0597015	0.0298507	0.0248756	0.150165	0.328383	0.165017	0.356436	0.684818	0.493399	0.1369	0.4405	0.1046	0.4966	0.242
Rv0134	4.11083	9.5924	0.627822	8.01735	8.05713	7.65259	8.38926	0.736667	6.79256	6.06798	-0.70122	0	-0.298313	0.926135	0.703413	ephF	903	1	0.0866667	0.00666667	0.0833333	0.0533333	0.0333333	0.103333	0.03	0.03	0.02	0.0933333	0.0333333	0.0166667	0.0666667	0.0166667	0.0966667	0.0233333	0.0333333	0.106667	0.0433333	0.0233333	0.145072	0.290144	0.188261	0.376523	0.666667	0.478405	0.156	0.472	0.0548	0.5143	0.25
Rv0135c	5.54318	11.6134	0.782019	8.17133	8.10731	7.72676	8.57399	0.847226	6.7912	5.50358	0.741944	0	-0.147416	0.929435	0.85431	Rv0135c	606	0	0.119403	0.00497512	0.0497512	0.0646766	0.0298507	0.0597015	0.0149254	0.0547264	0.00995025	0.129353	0.00995025	0.0298507	0.0547264	0.0298507	0.0945274	0.0696517	0.0646766	0.079602	0.00995025	0.0199005	0.169967	0.338284	0.179868	0.311881	0.650165	0.518152	0.113	0.5254	0.1012	0.4331	0.24
Rv0136	3.05739	12.253	1.05189	6.018	5.92852	5.34216	6.55761	1.21545	6.78088	5.69967	0.893973	0	0.0569572	0.994933	1.05868	cyp138	1326	1	0.0997732	0.00226757	0.0544218	0.0544218	0.0453515	0.0816327	0.0204082	0.0498866	0.0226757	0.0952381	0.0249433	0.0249433	0.0702948	0.0294785	0.113379	0.0453515	0.0544218	0.0748299	0.015873	0.0204082	0.171946	0.328808	0.171192	0.328054	0.656863	0.5	0.1277	0.5027	0.1032	0.4587	0.252
Rv0137c	5.34318	10.3188	0.697103	7.61144	7.52787	7.12487	8.08035	0.95548	6.79154	3.32202	0.325937	0	-0.225402	0.922505	0.776325	msrA	549	0	0.0769231	0.010989	0.0604396	0.0604396	0.0494505	0.0879121	0.0274725	0.0494505	0.021978	0.0659341	0.00549451	0.0384615	0.0604396	0.0494505	0.0769231	0.0549451	0.0824176	0.0549451	0.021978	0.043956	0.211293	0.349727	0.149362	0.289617	0.639344	0.499089	0.0784	0.634	0.1333	0.3968	0.271
Rv0138	3.34398	10.0403	0.832213	6.50943	6.55558	6.02586	7.0548	1.02895	6.78728	3.99739	-0.465588	0	-0.122472	0.954684	0.879255	Rv0138	504	1	0.11976	0.0239521	0.0598802	0.0718563	0.0359281	0.0658683	0.0239521	0.0658683	0.0239521	0.0479042	0.0419162	0.0239521	0.0419162	0.0359281	0.0898204	0.0598802	0.0598802	0.0419162	0.0419162	0.0239521	0.190476	0.30754	0.172619	0.329365	0.636905	0.480159	0.1288	0.5682	0.0902	0.4595	0.294
Rv0139	1.84783	8.26077	0.935516	6.72004	6.89177	6.24281	7.34956	1.10675	6.78515	6.19359	-1.30551	0	-0.00651678	0.942033	0.99521	Rv0139	1023	1	0.138235	0.0117647	0.0676471	0.05	0.0294118	0.0823529	0.0176471	0.0264706	0.0176471	0.0794118	0.0294118	0.0176471	0.0529412	0.0147059	0.111765	0.05	0.0588235	0.105882	0.0147059	0.0235294	0.155425	0.323558	0.16911	0.351906	0.675464	0.492669	0.1212	0.5051	0.1007	0.4324	0.255
Rv0140	5.22576	13.9403	1.21258	8.01921	7.80468	7.33663	8.30629	0.969651	6.78494	6.09975	1.50318	0	0.286414	0.926168	1.28814	Rv0140	381	1	0.126984	0.0238095	0.0714286	0.0634921	0.015873	0.0396825	0.015873	0.0714286	0.015873	0.0396825	0.015873	0.031746	0.0793651	0.031746	0.047619	0.0555556	0.0714286	0.111111	0.00793651	0.0634921	0.223097	0.293963	0.173228	0.309711	0.603675	0.467192	0.1468	0.4954	0.1368	0.4651	0.328
Rv0141c	5.7598	12.1424	0.788808	8.14849	8.07317	7.68656	8.51348	0.826922	6.7911	5.48071	0.726006	0	-0.140067	0.928875	0.86166	Rv0141c	411	0	0.0588235	0.0441176	0.0808824	0.0955882	0.0588235	0.0588235	0.00735294	0.0441176	0.0220588	0.0735294	0.0220588	0.0220588	0.0367647	0.0294118	0.0808824	0.0588235	0.0735294	0.0882353	0.0147059	0.0294118	0.216545	0.294404	0.177616	0.311436	0.605839	0.472019	0.0811	0.6126	0.1735	0.4022	0.303
Rv0142	1.64174	11.1099	1.23246	6.00986	5.99886	5.29841	6.5817	1.28328	6.77448	3.88564	0.256833	0	0.236763	0.995695	1.23849	Rv0142	927	1	0.152597	0.00974026	0.0487013	0.0454545	0.025974	0.0876623	0.025974	0.0292208	0.00649351	0.0876623	0.0227273	0.00974026	0.0909091	0.025974	0.113636	0.0454545	0.0422078	0.100649	0.0227273	0.00649351	0.113269	0.338727	0.161812	0.386192	0.724919	0.500539	0.107	0.4428	0.0547	0.5344	0.23
Rv0143c	3.20318	8.2137	0.605459	7.09529	7.24853	6.87541	7.47674	0.601331	6.79177	11.3036	-2.28161	0	-0.321804	0.927263	0.679922	Rv0143c	1479	0	0.138211	0.00406504	0.0264228	0.0386179	0.0426829	0.144309	0.0121951	0.0792683	0.0142276	0.113821	0.0162602	0.0142276	0.0589431	0.0121951	0.0528455	0.0569106	0.0528455	0.0752033	0.0182927	0.0284553	0.142664	0.325896	0.185936	0.345504	0.6714	0.511832	0.0835	0.5124	0.1019	0.4531	0.277
Rv0144	5.10797	11.2623	0.977382	9.21504	9.26763	8.77469	9.82244	1.04775	6.78983	5.1657	-0.955606	0	0.0197732	0.957608	1.0215	Rv0144	843	1	0.128571	0.00714286	0.0392857	0.0571429	0.0357143	0.0642857	0.025	0.0285714	0.0178571	0.0821429	0.025	0.0142857	0.0678571	0.0357143	0.0857143	0.0571429	0.0892857	0.0964286	0.0178571	0.025	0.175563	0.321471	0.188612	0.314353	0.635824	0.510083	0.1681	0.4412	0.1447	0.4136	0.242
Rv0145	6.59337	13.3923	0.748084	9.97014	9.97921	9.58675	10.3674	0.780623	6.79285	5.92408	-0.375022	0	-0.235355	0.983439	0.766371	Rv0145	954	1	0.164038	0.00315457	0.0820189	0.044164	0.022082	0.0694006	0.022082	0.0252366	0.00946372	0.0977918	0.0157729	0.0189274	0.044164	0.0410095	0.0851735	0.044164	0.0725552	0.0883281	0.0283912	0.022082	0.16457	0.325996	0.166667	0.342767	0.668763	0.492662	0.135	0.4781	0.12	0.438	0.235
Rv0146	5.38149	11.7363	0.827292	8.04983	7.96301	7.51229	8.5607	1.0484	6.79046	4.20764	0.385484	0	-0.0994361	0.926728	0.90229	Rv0146	933	1	0.174194	0	0.083871	0.0580645	0.0258065	0.0548387	0.0129032	0.0387097	0.0193548	0.0709677	0.0225806	0.00967742	0.0483871	0.0322581	0.0935484	0.0387097	0.0709677	0.0903226	0.0258065	0.0290323	0.172562	0.330118	0.158628	0.338692	0.66881	0.488746	0.1341	0.5134	0.1143	0.4206	0.265
Rv0147	5.59928	11.738	0.577741	8.49535	8.50372	8.16681	8.7703	0.603486	6.79339	7.71782	0.128838	0	-0.360916	0.938656	0.640811	Rv0147	1521	1	0.132411	0.00395257	0.0573123	0.055336	0.0316206	0.0750988	0.00988142	0.041502	0.0494071	0.0790514	0.0237154	0.0197628	0.0612648	0.0296443	0.0790514	0.0513834	0.0612648	0.0948617	0.0118577	0.0316206	0.186719	0.314924	0.170283	0.328074	0.642998	0.485207	0.1381	0.5071	0.1049	0.4473	0.305
Rv0148	6.21944	11.7066	0.610055	8.66204	8.66966	8.32759	9.0195	0.691917	6.79322	5.36244	0.0861099	0	-0.333188	0.943243	0.668538	Rv0148	861	1	0.143357	0.00699301	0.0559441	0.0524476	0.034965	0.129371	0.020979	0.0384615	0.0384615	0.0804196	0.013986	0.0454545	0.0314685	0.020979	0.041958	0.0384615	0.0524476	0.111888	0.0104895	0.0314685	0.183508	0.299652	0.174216	0.342625	0.642276	0.473868	0.1457	0.5466	0.0942	0.4104	0.29
Rv0149	5.28018	9.59325	0.628871	7.90153	7.96445	7.51969	8.29555	0.775866	6.79248	3.92457	-0.539986	0	-0.29572	0.924591	0.706006	Rv0149	969	1	0.124224	0.00621118	0.0590062	0.0372671	0.0279503	0.127329	0.00931677	0.0341615	0.0310559	0.111801	0.0186335	0.0217391	0.0621118	0.0341615	0.0403727	0.0403727	0.0341615	0.142857	0.00931677	0.0279503	0.157895	0.28999	0.199174	0.352941	0.642931	0.489164	0.1571	0.4464	0.1174	0.4466	0.274
Rv0150c	0	7.39722	1.71039	4.11506	3.8523	3.00163	5.41202	2.41039	6.6963	2.575	0.0278616	0.0279642	0.490745	1.21965	1.49247	Rv0150c	288	0	0.210526	0.0210526	0.0631579	0.0210526	0	0.0526316	0.0315789	0.0736842	0.0105263	0.0842105	0.0105263	0.0315789	0.0842105	0.0105263	0.0315789	0.0947368	0.0736842	0.0631579	0.0105263	0.0210526	0.166667	0.347222	0.1875	0.298611	0.645833	0.534722	0.191	0.4382	0.0909	0.4286	0.254
Rv0151c	2.04897	7.259	0.766348	4.89747	4.91353	4.43992	5.47966	1.03974	6.78309	3.13873	-0.323741	0	-0.359007	1.12535	0.64272	PE1	1767	0	0.137755	0	0.0323129	0.0306122	0.047619	0.0731293	0.0102041	0.0629252	0.0085034	0.110544	0.0153061	0.0510204	0.102041	0.0459184	0.0170068	0.0510204	0.0918367	0.0748299	0.00510204	0.0323129	0.191285	0.342388	0.191285	0.275042	0.617431	0.533673	0.1331	0.4544	0.1371	0.4622	0.252
Rv0152c	1.83117	6.86783	0.734466	4.77217	4.80453	4.35671	5.25708	0.900365	6.78346	3.7898	-0.338575	0	-0.405905	1.14037	0.595821	PE2	1578	0	0.125714	0.00571429	0.0419048	0.0247619	0.0342857	0.0647619	0.0171429	0.0514286	0.00952381	0.112381	0.0152381	0.0419048	0.100952	0.0361905	0.0685714	0.0495238	0.0971429	0.0628571	0.00380952	0.0361905	0.190114	0.352978	0.17744	0.279468	0.632446	0.530418	0.1297	0.4456	0.1422	0.4557	0.22
Rv0153c	3.19302	8.18007	0.633991	6.87557	6.99602	6.67574	7.21761	0.541872	6.79113	9.39961	-1.98484	0	-0.300394	0.934385	0.701333	ptbB	831	0	0.115942	0.00362319	0.0942029	0.0471014	0.0326087	0.0833333	0.0144928	0.0289855	0.0108696	0.108696	0.0144928	0.0253623	0.0398551	0.0289855	0.119565	0.0615942	0.0652174	0.0797101	0.00362319	0.0217391	0.170878	0.351384	0.154031	0.323706	0.67509	0.505415	0.0972	0.5466	0.1284	0.4	0.279
Rv0154c	3.52929	8.76962	0.595404	7.23976	7.27853	6.91234	7.58051	0.668171	6.79216	8.89732	-1.28001	0	-0.329081	0.924484	0.672646	fadE2	1212	0	0.143921	0.0148883	0.0620347	0.0595533	0.0248139	0.0694789	0.0347395	0.0595533	0.0272953	0.0719603	0.0322581	0.0322581	0.0471464	0.0372208	0.0868486	0.0471464	0.0521092	0.0595533	0.0198511	0.0173697	0.192244	0.35231	0.136139	0.319307	0.671617	0.488449	0.0482	0.6325	0.1075	0.4346	0.328
Rv0155	2.31493	10.2025	1.10738	6.53875	6.78633	6.02223	7.25523	1.233	6.77999	4.83805	-1.15013	0	0.154622	0.952761	1.15635	pntAa	1101	1	0.15847	0.00546448	0.057377	0.057377	0.0163934	0.0928962	0.00546448	0.0327869	0.0300546	0.0956284	0.0136612	0.0191257	0.0546448	0.0382514	0.057377	0.0546448	0.0737705	0.117486	0.00546448	0.0136612	0.161671	0.313351	0.158038	0.366939	0.680291	0.47139	0.115	0.4569	0.0823	0.5066	0.248
Rv0156	0	9.75364	1.23146	7.2014	7.50136	6.6585	8.0182	1.3597	6.77901	6.22828	-1.44074	0.00111857	0.306354	0.92511	1.30808	pntAb	333	1	0.0818182	0	0.0272727	0.0454545	0.0636364	0.0909091	0.0272727	0.0727273	0.0454545	0.136364	0.0363636	0.0454545	0.0545455	0.00909091	0.0272727	0.0363636	0.0454545	0.145455	0	0.00909091	0.186186	0.303303	0.213213	0.297297	0.600601	0.516517	0.0421	0.5579	0.1264	0.481	0.249
Rv0157	3.57926	10.8422	1.00169	7.89478	8.12397	7.36963	8.53132	1.16168	6.78706	5.87407	-1.28947	0	0.0771573	0.924531	1.07888	pntB	1428	1	0.143158	0	0.04	0.0252632	0.0315789	0.113684	0.0210526	0.0821053	0.0315789	0.0989474	0.0484211	0.0378947	0.0442105	0.0210526	0.0231579	0.0568421	0.0484211	0.105263	0.00842105	0.0189474	0.167367	0.309524	0.188375	0.334734	0.644258	0.497899	0.073	0.5426	0.0557	0.5148	0.305
Rv0158	3.85829	9.70988	0.755518	7.25159	7.31235	6.88656	7.7575	0.870944	6.79008	4.63573	-0.794868	0	-0.168788	0.924305	0.832939	Rv0158	645	1	0.11215	0.0046729	0.046729	0.0841121	0.0280374	0.0654206	0.0280374	0.0514019	0.0280374	0.088785	0.0140187	0.0186916	0.0327103	0.0373832	0.0841121	0.0700935	0.0700935	0.0607477	0.0140187	0.0607477	0.19845	0.31938	0.156589	0.325581	0.644961	0.475969	0.1023	0.5511	0.0833	0.5032	0.302
Rv0159c	0	7.41834	1.1911	4.74454	4.51153	3.86943	5.82176	1.95232	6.76279	2.5498	0.00206548	0.00223714	0.0474152	1.14368	1.04914	PE3	1407	0	0.155983	0.00213675	0.034188	0.0320513	0.034188	0.0918803	0.0106838	0.0534188	0.00213675	0.104701	0.025641	0.0534188	0.0876068	0.042735	0.025641	0.0726496	0.0576923	0.0576923	0.00641026	0.0491453	0.18479	0.33973	0.189055	0.286425	0.626155	0.528785	0.1367	0.4892	0.1362	0.4152	0.252
Rv0160c	0	7.34451	0.981425	3.14738	3.0413	2.47702	3.60499	1.12798	6.74854	5.57246	1.03574	0.00223714	-0.356165	1.33759	0.645562	PE4	1509	0	0.135458	0.00199203	0.0418327	0.0278884	0.0498008	0.0856574	0.0179283	0.059761	0.00796813	0.0996016	0.0199203	0.063745	0.0996016	0.0398406	0.0199203	0.0537849	0.063745	0.0557769	0.0059761	0.0498008	0.18224	0.347913	0.18224	0.287608	0.63552	0.530152	0.1197	0.5033	0.0798	0.5145	0.329
Rv0161	1.40972	7.86144	0.863223	4.82791	4.85798	4.26953	5.35607	1.08654	6.77918	3.9615	-0.168098	0	-0.270466	1.13369	0.73126	Rv0161	1350	1	0.131403	0.013363	0.0690423	0.0512249	0.0178174	0.104677	0.0334076	0.0178174	0.00890869	0.120267	0.0200445	0.0178174	0.0445434	0.0155902	0.0890869	0.0512249	0.0556793	0.115813	0.00445434	0.0178174	0.145185	0.317778	0.177778	0.359259	0.677037	0.495556	0.1361	0.4728	0.0967	0.4435	0.237
Rv0162c	1.41373	7.72541	0.850986	5.05443	5.00957	4.5875	5.48541	0.897911	6.78118	4.14043	-0.0520301	0	-0.254473	1.10546	0.747254	adhE1	1152	0	0.109661	0.0156658	0.0496084	0.0339426	0.0130548	0.120104	0.0313316	0.0443864	0.0130548	0.0992167	0.0104439	0.0130548	0.0809399	0.0313316	0.0574413	0.0574413	0.0522193	0.143603	0.0078329	0.0156658	0.138889	0.328125	0.184896	0.34809	0.676215	0.513021	0.1441	0.4755	0.0864	0.4365	0.229
Rv0163	0	8.13607	1.03056	5.72213	5.70408	5.06803	6.47422	1.40619	6.77835	4.16641	-0.458749	0.00111857	0.00718624	1.02337	1.00891	Rv0163	456	1	0.0927152	0.013245	0.0529801	0.0397351	0.0397351	0.0728477	0.0198675	0.0397351	0.013245	0.10596	0.0264901	0.0331126	0.0728477	0.00662252	0.0728477	0.0728477	0.0596026	0.10596	0.0264901	0.0331126	0.166667	0.291667	0.20614	0.335526	0.627193	0.497807	0.1642	0.4179	0.0877	0.5093	0.252
Rv0164	3.63544	12.2688	1.10216	9.2053	9.45015	8.77526	9.86006	1.0848	6.78785	8.22872	-1.7443	0	0.14484	0.957319	1.14657	TB18.5	486	1	0.118012	0.00621118	0.0434783	0.0745342	0.0124224	0.0496894	0.0124224	0.0434783	0.0310559	0.0807453	0.0496894	0.0310559	0.0559006	0.068323	0.0496894	0.0559006	0.0559006	0.111801	0.0124224	0.0372671	0.218107	0.304527	0.17284	0.304527	0.609053	0.477366	0.1463	0.5447	0.125	0.4132	0.272
Rv0165c	0	10.1115	1.92066	6.58187	6.7131	4.97829	8.3738	3.3955	6.75001	2.09174	-0.218868	0.0033557	0.970626	0.950031	1.97235	mce1R	672	0	0.152466	0	0.0493274	0.0493274	0.0269058	0.0941704	0.0358744	0.0538117	0.0224215	0.0986547	0.0224215	0.0269058	0.044843	0.0313901	0.121076	0.058296	0.044843	0.0493274	0.0134529	0.0044843	0.174107	0.333333	0.16369	0.328869	0.662202	0.497024	0.1606	0.4663	0.1413	0.4012	0.27
Rv0166	2.68923	12.0393	1.48109	7.89789	7.75058	6.94727	9.01199	2.06472	6.77754	3.17019	-0.187414	0	0.556531	0.924559	1.55826	fadD5	1665	1	0.122744	0.0108303	0.0523466	0.0577617	0.0270758	0.0812274	0.0162455	0.0469314	0.0198556	0.106498	0.032491	0.0415162	0.0541516	0.0361011	0.066787	0.0397112	0.0559567	0.0974729	0.0144404	0.0198556	0.193393	0.305105	0.178378	0.323123	0.628228	0.483483	0.1266	0.4936	0.1376	0.439	0.271
Rv0167	4.00648	11.2729	1.43541	8.40451	8.44693	7.39818	9.50001	2.10183	6.78072	2.51603	-0.258688	0	0.499435	0.935971	1.50116	yrbE1A	798	1	0.090566	0.0188679	0.0188679	0.0226415	0.0528302	0.128302	0.00377358	0.0792453	0.0113208	0.14717	0.0226415	0.0188679	0.0301887	0.0264151	0.0490566	0.0301887	0.10566	0.116981	0.0113208	0.0150943	0.137845	0.31203	0.22807	0.322055	0.634085	0.5401	0.1286	0.4896	0.0717	0.4554	0.29
Rv0168	3.30775	10.0932	1.34712	7.25697	7.26794	6.29485	8.3578	2.06295	6.77791	2.47766	-0.278623	0	0.422891	0.924226	1.42462	yrbE1B	870	1	0.145329	0.00346021	0.017301	0.0346021	0.0553633	0.114187	0.0103806	0.0726644	0.00692042	0.100346	0.0346021	0.0207612	0.0242215	0.0311419	0.0484429	0.0622837	0.0657439	0.107266	0.00692042	0.0380623	0.137931	0.314943	0.21954	0.327586	0.642529	0.534483	0.1289	0.5312	0.0468	0.4533	0.285
Rv0169	2.94214	10.6845	1.51589	7.76655	7.93304	6.69476	8.94744	2.25268	6.7756	2.82384	-0.517124	0	0.592444	0.923446	1.59417	mce1A	1365	1	0.118943	0.00440529	0.061674	0.030837	0.0286344	0.0947137	0.00660793	0.0506608	0.0330396	0.110132	0.0132159	0.0506608	0.0726872	0.0242291	0.0440529	0.0506608	0.0837004	0.0792952	0.00660793	0.0352423	0.190476	0.306227	0.185348	0.317949	0.624176	0.491575	0.1407	0.4272	0.1056	0.5252	0.245
Rv0170	3.68536	11.7116	1.40673	7.92452	7.88093	6.90254	9.04681	2.14427	6.77971	2.4051	-0.0461399	0	0.481912	0.92482	1.48364	mce1B	1041	1	0.0722543	0.00578035	0.0606936	0.0346821	0.0433526	0.0982659	0.0144509	0.066474	0.0433526	0.112717	0.00867052	0.0578035	0.0346821	0.0578035	0.0635838	0.0404624	0.0722543	0.0895954	0.00289017	0.0202312	0.211335	0.294909	0.189241	0.304515	0.599424	0.48415	0.1424	0.5119	0.0919	0.498	0.28
Rv0171	4.53819	10.7563	1.20734	8.19252	8.26073	7.33568	9.12478	1.7891	6.78461	2.46942	-0.262806	0	0.277366	0.929973	1.27909	mce1C	1548	1	0.0912621	0.0038835	0.0524272	0.038835	0.038835	0.112621	0.0116505	0.0485437	0.0271845	0.0951456	0.00776699	0.038835	0.145631	0.0349515	0.0485437	0.0504854	0.0601942	0.0699029	0.00776699	0.015534	0.171835	0.351421	0.162145	0.314599	0.666021	0.513566	0.1275	0.4835	0.0967	0.4712	0.296
Rv0172	3.93749	11.7276	1.2746	8.07937	8.16243	7.24448	8.93319	1.68871	6.78292	3.01697	-0.271514	0	0.347284	0.92732	1.34901	mce1D	1593	1	0.0962264	0.00377358	0.0471698	0.0415094	0.0377358	0.0773585	0.0169811	0.0509434	0.0283019	0.10566	0.0113208	0.054717	0.111321	0.054717	0.0301887	0.0528302	0.0603774	0.0867925	0.00566038	0.0264151	0.193346	0.319523	0.185813	0.301318	0.620841	0.505336	0.1382	0.432	0.1087	0.5455	0.254
Rv0173	3.02235	10.3814	1.35891	7.82084	7.86116	6.98251	8.84372	1.86121	6.77982	3.24328	-0.568265	0	0.435021	0.923889	1.43675	lprK	1173	1	0.0897436	0.00769231	0.0666667	0.0282051	0.0179487	0.0820513	0.0102564	0.0538462	0.0333333	0.141026	0.0205128	0.0410256	0.0615385	0.0512821	0.0666667	0.0615385	0.0692308	0.0641026	0.0102564	0.0230769	0.185848	0.321398	0.182438	0.310315	0.631714	0.503836	0.1317	0.482	0.0767	0.5103	0.264
Rv0174	5.71651	11.5428	1.05472	9.11649	9.11582	8.40719	9.93692	1.52972	6.78886	2.98294	-0.417036	0	0.0999737	0.954743	1.1017	mce1F	1548	1	0.102913	0.015534	0.0524272	0.0271845	0.0174757	0.0893204	0.0038835	0.0543689	0.031068	0.0873786	0.00776699	0.0446602	0.102913	0.0563107	0.0427184	0.0679612	0.0718447	0.0854369	0.00970874	0.0291262	0.192506	0.312661	0.186693	0.30814	0.620801	0.499354	0.183	0.4241	0.1111	0.4759	0.271
Rv0175	7.21714	11.3606	0.660675	9.95863	10.0874	9.7083	10.3704	0.66214	6.79343	5.85441	-1.46476	0	-0.322326	0.983001	0.6794	Rv0175	642	1	0.187793	0.0140845	0.0798122	0.0657277	0.00938967	0.0798122	0.0140845	0.028169	0.0375587	0.0798122	0.028169	0.0187793	0.0187793	0.0516432	0.0657277	0.0751174	0.0375587	0.0798122	0.00469484	0.0234742	0.180685	0.283489	0.174455	0.361371	0.64486	0.457944	0.2069	0.4195	0.104	0.479	0.245
Rv0176	4.41727	9.91977	0.922625	8.15806	8.33227	7.65226	8.87468	1.22242	6.78899	4.23954	-1.07923	0	-0.00648247	0.929107	0.995244	Rv0176	969	1	0.127329	0.00931677	0.0465839	0.0279503	0.0186335	0.0590062	0.00931677	0.0279503	0.015528	0.124224	0.015528	0.015528	0.0652174	0.0496894	0.102484	0.0465839	0.0869565	0.102484	0.0341615	0.015528	0.157895	0.303406	0.189886	0.348813	0.652219	0.493292	0.1516	0.3502	0.1333	0.5057	0.214
Rv0177	3.47338	12.7127	1.09936	9.10655	9.27179	8.47019	9.78413	1.31394	6.78815	4.36063	-0.639338	0	0.144898	0.954462	1.14662	Rv0177	555	1	0.119565	0.00543478	0.0434783	0.0597826	0.0271739	0.0543478	0.0326087	0.0543478	0.0380435	0.076087	0.0326087	0.0380435	0.048913	0.0326087	0.0706522	0.0978261	0.0543478	0.0815217	0.0217391	0.0108696	0.212613	0.284685	0.189189	0.313514	0.598198	0.473874	0.1867	0.3933	0.1586	0.4741	0.292
Rv0178	5.13653	10.687	0.889469	8.92636	9.11565	8.49437	9.59224	1.09787	6.79047	5.50125	-1.34907	0	-0.0601312	0.9496	0.941595	Rv0178	735	1	0.184426	0	0.0696721	0.0491803	0.0204918	0.0614754	0.00409836	0.0327869	0.0327869	0.0614754	0.0204918	0.0327869	0.0245902	0.0327869	0.0778689	0.0655738	0.118852	0.0696721	0.00819672	0.0327869	0.204082	0.312925	0.157823	0.32517	0.638095	0.470748	0.1571	0.4714	0.1055	0.445	0.271
Rv0179c	5.04124	10.6844	1.01566	8.38303	8.55893	7.79226	9.1097	1.31745	6.7881	3.2952	-0.692408	0	0.08033	0.935335	1.08206	lprO	1110	0	0.124661	0.0189702	0.0460705	0.0271003	0.0189702	0.127371	0.0216802	0.0352304	0.0243902	0.097561	0.0243902	0.0460705	0.0514905	0.0433604	0.0677507	0.0596206	0.0650407	0.0460705	0.0216802	0.0325203	0.190991	0.325225	0.166667	0.317117	0.642342	0.491892	0.1483	0.5174	0.1338	0.3801	0.258
Rv0180c	4.13012	9.56991	0.724391	6.78805	6.74173	6.37712	7.27848	0.901354	6.78996	4.12386	-0.080883	0	-0.214099	0.938489	0.787628	Rv0180c	1359	0	0.137168	0	0.0265487	0.0265487	0.039823	0.090708	0.0132743	0.0575221	0.0154867	0.128319	0.0265487	0.0309735	0.0597345	0.0376106	0.050885	0.0730088	0.0619469	0.0862832	0.0110619	0.0265487	0.17145	0.32156	0.18911	0.317881	0.639441	0.51067	0.0852	0.4561	0.1367	0.4841	0.249
Rv0181c	2.99072	10.8429	0.919386	6.7823	6.85406	6.3199	7.26756	0.947663	6.78631	5.68141	-0.112151	0	-0.0193936	0.93878	0.982333	Rv0181c	735	0	0.114754	0.00409836	0.0778689	0.0491803	0.0286885	0.0901639	0.0532787	0.0409836	0.00819672	0.0983607	0.0286885	0.0286885	0.0491803	0.0327869	0.057377	0.0737705	0.0737705	0.057377	0.0163934	0.0163934	0.198639	0.329252	0.170068	0.302041	0.631293	0.49932	0.1374	0.5024	0.1593	0.4012	0.255
Rv0182c	2.15223	11.5949	0.830731	7.25264	7.19052	6.84265	7.57594	0.733288	6.78916	11.1254	0.711914	0	-0.093559	0.92429	0.908167	sigG	1113	0	0.121622	0.00810811	0.0621622	0.0567568	0.027027	0.0486486	0.0243243	0.0324324	0.0135135	0.116216	0.0216216	0.0135135	0.0675676	0.0378378	0.0972973	0.072973	0.0594595	0.0783784	0.0162162	0.0243243	0.15903	0.336029	0.183288	0.321653	0.657682	0.519317	0.1361	0.4589	0.101	0.4842	0.237
Rv0183	3.11827	8.7466	0.832222	7.27474	7.47099	7.07467	7.79411	0.719439	6.78857	7.12735	-1.8378	0	-0.0917506	0.923972	0.909976	Rv0183	840	1	0.100358	0.00716846	0.0681004	0.0537634	0.0179211	0.0967742	0.0358423	0.0358423	0.0143369	0.103943	0.0143369	0.0179211	0.0609319	0.0286738	0.0824373	0.0286738	0.0573477	0.132616	0.00716846	0.0358423	0.159524	0.317857	0.175	0.347619	0.665476	0.492857	0.1423	0.4756	0.0856	0.4811	0.294
Rv0184	2.39519	13.0369	1.07033	7.62821	7.65642	7.18083	8.08406	0.903224	6.78582	9.4929	0.543277	0	0.147759	0.922574	1.14949	Rv0184	750	1	0.200803	0.00401606	0.060241	0.0321285	0.0240964	0.0682731	0.0200803	0.0361446	0.0160643	0.0763052	0.0160643	0.0321285	0.0361446	0.0441767	0.124498	0.060241	0.0722892	0.0401606	0.00401606	0.0321285	0.176	0.368	0.128	0.328	0.696	0.496	0.0769	0.5249	0.1244	0.4479	0.23
Rv0185	3.0906	12.6378	0.976782	7.37173	7.34261	6.93961	7.79913	0.859513	6.78714	10.67	1.13213	0	0.0539058	0.922877	1.05563	Rv0185	510	1	0.118343	0.0118343	0.035503	0.0591716	0.0414201	0.0828402	0.0532544	0.0118343	0	0.0591716	0.0177515	0.0118343	0.0769231	0.035503	0.0887574	0.0295858	0.0769231	0.153846	0.0118343	0.0236686	0.14902	0.301961	0.182353	0.366667	0.668627	0.484314	0.1342	0.3691	0.1333	0.5414	0.254
Rv0186	4.38485	11.8768	0.850027	7.44328	7.43562	7.00691	7.80565	0.798735	6.78933	8.22842	0.970504	0	-0.0724264	0.922453	0.9293	bglS	2076	1	0.13314	0.00578871	0.0520984	0.0463097	0.0289436	0.111433	0.0144718	0.0463097	0.0144718	0.0940666	0.0202605	0.0390738	0.0680174	0.0332851	0.0723589	0.0593343	0.0448625	0.0680174	0.0202605	0.0274964	0.166667	0.30973	0.174374	0.349229	0.65896	0.484104	0.1438	0.4515	0.1024	0.4874	0.255
Rv0186A	5.35517	16.7931	2.02567	10.5319	10.0662	8.942	11.8359	2.89387	6.77775	2.74874	0.676203	0	1.01953	1.00613	2.02126	mymT	162	0	0.0943396	0.132075	0.0377358	0.0754717	0	0.113208	0.0377358	0.0377358	0.0188679	0.0566038	0.0377358	0.0188679	0.0377358	0	0.0943396	0.0188679	0.0754717	0.0754717	0	0.0377358	0.185185	0.290123	0.185185	0.339506	0.62963	0.475309	0.1522	0.587	0.1351	0.3429	0.292
Rv0187	1.29034	9.14231	0.79295	6.84514	6.95462	6.47334	7.28095	0.807605	6.78814	13.3887	-1.90925	0	-0.142776	0.935726	0.858951	Rv0187	663	1	0.163636	0.00454545	0.0818182	0.0363636	0.0272727	0.104545	0.00909091	0.05	0.0181818	0.104545	0.0181818	0.0227273	0.05	0.05	0.0727273	0.0227273	0.0409091	0.1	0.0136364	0.00909091	0.158371	0.309201	0.170437	0.361991	0.671192	0.479638	0.1204	0.4817	0.1056	0.4734	0.266
Rv0188	6.41751	15.7631	1.31193	8.88276	8.5627	7.99993	9.46243	1.46251	6.78546	6.64279	1.5836	0	0.363435	0.948496	1.36516	Rv0188	432	1	0.160839	0.00699301	0.034965	0.00699301	0.0559441	0.0979021	0.034965	0.0559441	0	0.104895	0.034965	0.00699301	0.041958	0.013986	0.041958	0.0699301	0.0699301	0.0979021	0.034965	0.027972	0.145833	0.291667	0.231481	0.331019	0.622685	0.523148	0.1615	0.3846	0.1468	0.4554	0.224
Rv0189c	3.94706	10.9883	0.638661	7.68048	7.76823	7.48428	8.02595	0.541671	6.79203	11.0538	-1.78811	0	-0.284186	0.922847	0.717541	ilvD	1728	0	0.135652	0.013913	0.0747826	0.0486957	0.0295652	0.118261	0.0208696	0.0486957	0.0278261	0.093913	0.0313043	0.0173913	0.0504348	0.0121739	0.0608696	0.066087	0.0486957	0.0886957	0.00173913	0.0104348	0.168981	0.321759	0.173611	0.335648	0.657407	0.49537	0.1267	0.5287	0.1217	0.3912	0.292
Rv0190	6.33813	12.6773	1.06615	9.61632	9.56834	8.95236	10.2888	1.33641	6.78955	3.09932	0.112744	0	0.0955992	0.970547	1.09733	Rv0190	291	1	0.15625	0.0208333	0.0520833	0.0625	0	0.0729167	0.03125	0.0520833	0.0416667	0.09375	0.0208333	0.0208333	0.0104167	0.0416667	0.09375	0.0625	0.0520833	0.0833333	0	0.03125	0.202749	0.302405	0.154639	0.340206	0.642612	0.457045	0.125	0.5	0.1266	0.4595	0.329
Rv0191	3.07378	9.32235	0.801319	6.85634	6.80843	6.38024	7.23981	0.859569	6.78875	5.27834	-0.130578	0	-0.133901	0.935221	0.867825	Rv0191	1242	1	0.16707	0.00968523	0.0169492	0.0145278	0.0193705	0.0871671	0.0217918	0.0387409	0.00484262	0.140436	0.031477	0.0121065	0.0508475	0.0145278	0.062954	0.0581114	0.0871671	0.118644	0.0242131	0.0193705	0.123188	0.327697	0.198068	0.351047	0.678744	0.525765	0.125	0.4229	0.0716	0.4775	0.252
Rv0192	6.23401	10.1564	0.476198	7.868	7.90586	7.68386	8.08855	0.404692	6.79386	5.12885	-0.29957	0	-0.448098	0.924296	0.553628	Rv0192	1101	1	0.103825	0.010929	0.0628415	0.0273224	0.0355191	0.0956284	0.0218579	0.0327869	0.0273224	0.0382514	0.0245902	0.0464481	0.125683	0.0245902	0.0601093	0.0765027	0.0519126	0.0901639	0.0218579	0.0218579	0.176203	0.344233	0.160763	0.318801	0.663034	0.504995	0.125	0.5156	0.1014	0.4394	0.309
Rv0193c	0.429932	10.122	1.1632	4.66132	4.51393	3.78746	5.63569	1.84823	6.76429	3.74429	0.337481	0	0.00952046	1.15368	1.01125	Rv0193c	1848	0	0.105691	0.0113821	0.0845528	0.0650407	0.0373984	0.0471545	0.0243902	0.0536585	0.0308943	0.121951	0.0227642	0.0211382	0.0536585	0.0422764	0.0796748	0.0650407	0.0455285	0.0504065	0.0162602	0.0211382	0.202381	0.32197	0.181818	0.293831	0.615801	0.503788	0.1381	0.5148	0.1471	0.4404	0.28
Rv0194	0.806554	7.33439	0.985876	3.38049	3.21636	2.74956	3.89859	1.14903	6.75503	4.77561	0.990334	0	-0.323216	1.30909	0.678511	Rv0194	3585	1	0.140704	0.0117253	0.0519263	0.0360134	0.0242881	0.0770519	0.0251256	0.0427136	0.00753769	0.137353	0.0117253	0.0108878	0.0410385	0.038526	0.0946399	0.038526	0.0670017	0.103853	0.0134003	0.0259631	0.144212	0.324686	0.187727	0.343375	0.668061	0.512413	0.1285	0.44	0.0975	0.4946	0.229
Rv0195	0	9.21295	1.47858	3.42912	3.39309	2.40619	4.33879	1.9326	6.69477	3.27954	0.342839	0.0178971	0.175426	1.30315	1.17715	Rv0195	636	1	0.118483	0.0236967	0.0473934	0.056872	0.014218	0.042654	0.028436	0.0521327	0.028436	0.132701	0.00947867	0.0189573	0.042654	0.0379147	0.0900474	0.056872	0.07109	0.109005	0.00473934	0.014218	0.177673	0.325472	0.190252	0.306604	0.632075	0.515723	0.1484	0.4835	0.113	0.4398	0.245
Rv0196	0	12.0914	1.90569	6.03765	6.17814	4.38131	7.33735	2.95604	6.74333	2.73244	0.0580583	0.00111857	0.912584	0.993103	1.91431	Rv0196	585	1	0.154639	0.0103093	0.0670103	0.0721649	0.0206186	0.0670103	0.0309278	0.0463918	0.00515464	0.128866	0.0206186	0.0103093	0.0463918	0.0412371	0.108247	0.0463918	0.0360825	0.0618557	0.00515464	0.0206186	0.157265	0.317949	0.164103	0.360684	0.678632	0.482051	0.1205	0.4217	0.1013	0.557	0.246
Rv0197	3.1307	11.3809	1.50789	6.22302	6.21807	4.90702	7.28005	2.37303	6.7666	3.01738	0.412121	0	0.531365	0.976524	1.53309	Rv0197	2289	1	0.145669	0.015748	0.0551181	0.0564304	0.0367454	0.0787402	0.0262467	0.0406824	0.0249344	0.0918635	0.0144357	0.0328084	0.0603675	0.0314961	0.0721785	0.0433071	0.0590551	0.0708661	0.0170604	0.0262467	0.171254	0.33246	0.165574	0.330712	0.663172	0.498034	0.1166	0.5153	0.0914	0.4857	0.27
Rv0198c	5.94926	10.0599	0.599096	8.03028	8.0533	7.68187	8.42255	0.740686	6.79287	4.22371	-0.601502	0	-0.327267	0.926364	0.674459	zmp1	1992	0	0.122172	0.00301659	0.0965309	0.0467572	0.040724	0.081448	0.025641	0.0467572	0.025641	0.0859729	0.0120664	0.0286576	0.0452489	0.0452489	0.0754148	0.0361991	0.0512821	0.0678733	0.0271493	0.0361991	0.194779	0.327811	0.168675	0.308735	0.636546	0.496486	0.1321	0.5732	0.134	0.3921	0.33
Rv0199	0	8.03398	0.875724	6.62282	6.73495	6.2473	7.23037	0.983069	6.78572	9.18287	-1.7767	0.00111857	-0.0718197	0.947544	0.929907	Rv0199	660	1	0.127854	0	0.0821918	0.0547945	0.0136986	0.0547945	0.0228311	0.0365297	0.0228311	0.086758	0.0273973	0.0273973	0.0502283	0.0410959	0.0639269	0.086758	0.0776256	0.0958904	0.0136986	0.0136986	0.198485	0.325758	0.159091	0.316667	0.642424	0.484848	0.1087	0.5	0.1371	0.4431	0.245
Rv0200	2.23412	8.751	0.90906	7.01626	7.26481	6.69291	7.57152	0.87861	6.78644	7.28492	-1.75304	0	-0.0202972	0.929357	0.981429	Rv0200	690	1	0.183406	0.00873362	0.0480349	0.0262009	0.0262009	0.0655022	0.00873362	0.0349345	0.0131004	0.104803	0.0174672	0.0174672	0.0480349	0.0218341	0.0742358	0.069869	0.0655022	0.126638	0.0305677	0.00873362	0.137681	0.304348	0.191304	0.366667	0.671014	0.495652	0.1471	0.3873	0.0942	0.4973	0.236
Rv0201c	2.08574	10.206	0.766398	7.99565	8.07005	7.69281	8.34594	0.653125	6.79047	20.6489	-2.71517	0	-0.159378	0.925775	0.842349	Rv0201c	504	0	0.149701	0	0.0658683	0.0658683	0.0239521	0.0479042	0.011976	0.0479042	0.011976	0.0838323	0.0179641	0.011976	0.0598802	0.0479042	0.11976	0.0658683	0.0538922	0.0778443	0.0239521	0.011976	0.174603	0.349206	0.152778	0.323413	0.672619	0.501984	0.1	0.5214	0.1571	0.3939	0.204
Rv0202c	5.15324	11.4934	0.609215	7.84342	7.78763	7.44336	8.13025	0.68689	6.79274	6.94578	0.830929	0	-0.314867	0.924082	0.68686	mmpL11	2901	0	0.153209	0.0113872	0.0548654	0.0207039	0.0320911	0.0672878	0.0134576	0.0424431	0.0165631	0.110766	0.0331263	0.0175983	0.057971	0.0351967	0.0745342	0.0600414	0.0610766	0.0983437	0.0217391	0.0175983	0.15443	0.321958	0.186487	0.337125	0.659083	0.508445	0.1032	0.4484	0.118	0.489	0.24
Rv0203	0	10.5386	1.15379	7.7716	7.94707	7.18708	8.53279	1.34571	6.78287	8.80578	-1.55786	0.00223714	0.230303	0.923485	1.23203	Rv0203	411	1	0.169118	0.0147059	0.0367647	0.0294118	0.00735294	0.0735294	0.0220588	0.0220588	0.0294118	0.125	0.0294118	0.0147059	0.0588235	0.0588235	0.0514706	0.0955882	0.0735294	0.0808824	0	0.00735294	0.16545	0.316302	0.163017	0.355231	0.671533	0.479319	0.0948	0.3534	0.1102	0.5826	0.225
Rv0204c	2.03379	8.69988	0.660657	6.94008	6.9918	6.60233	7.36569	0.763363	6.79089	9.45729	-1.37367	0	-0.271196	0.931853	0.73053	Rv0204c	1239	0	0.143204	0.00485437	0.0339806	0.0291262	0.0364078	0.0946602	0.00970874	0.0364078	0.0169903	0.131068	0.0194175	0.0194175	0.0728155	0.0339806	0.065534	0.065534	0.0436893	0.0873786	0.0412621	0.0145631	0.139629	0.329298	0.186441	0.344633	0.673931	0.515738	0.0761	0.4873	0.118	0.4568	0.227
Rv0205	1.62738	7.83088	1.01064	6.0437	6.0587	5.46416	6.70894	1.24478	6.7808	4.32521	-0.68315	0	0.0181028	0.992541	1.01983	Rv0205	1104	1	0.171662	0	0.0299728	0.0245232	0.0463215	0.0844687	0.0163488	0.0517711	0.013624	0.160763	0.013624	0.0245232	0.0408719	0.0190736	0.0408719	0.0490463	0.0435967	0.138965	0.0163488	0.013624	0.123188	0.294384	0.225543	0.356884	0.651268	0.519928	0.1313	0.406	0.0584	0.5467	0.287
Rv0206c	6.70506	10.4534	0.631403	9.13982	9.21726	8.80771	9.57134	0.763628	6.79327	3.88687	-0.79113	0	-0.324007	0.95541	0.67772	mmpL3	2835	0	0.121822	0.00423729	0.0476695	0.032839	0.0391949	0.0858051	0.0116525	0.0625	0.0317797	0.108051	0.0264831	0.0180085	0.0699153	0.0317797	0.0646186	0.059322	0.0709746	0.0815678	0.0137712	0.0180085	0.17037	0.330159	0.17672	0.322751	0.65291	0.506878	0.0882	0.4841	0.1108	0.4937	0.284
Rv0207c	5.32	10.8821	0.888549	8.83027	8.89151	8.30954	9.54071	1.23117	6.79051	3.33637	-0.612953	0	-0.0586551	0.947204	0.943071	Rv0207c	729	0	0.119835	0	0.0743802	0.0702479	0.0371901	0.0743802	0.0123967	0.0289256	0.00826446	0.128099	0.0123967	0.0123967	0.0661157	0.0289256	0.0867769	0.0785124	0.0495868	0.0867769	0.0206612	0.00413223	0.171468	0.316872	0.182442	0.329218	0.646091	0.499314	0.1154	0.4423	0.2	0.4041	0.233
Rv0208c	4.08174	10.1068	0.990809	7.63758	7.8383	7.04689	8.19715	1.15026	6.78703	3.84796	-0.463681	0	0.0681914	0.922617	1.06992	Rv0208c	792	0	0.106464	0.0114068	0.0608365	0.0418251	0.0114068	0.0874525	0.0418251	0.0532319	0.0380228	0.110266	0.0152091	0.00760456	0.0798479	0.0342205	0.0874525	0.0570342	0.0418251	0.0836502	0.0190114	0.0114068	0.17803	0.329545	0.174242	0.318182	0.647727	0.503788	0.1473	0.4777	0.1389	0.4158	0.218
Rv0209	0.145962	8.934	0.916715	5.53422	5.62915	5.17355	5.96517	0.791621	6.77929	11.386	-1.66521	0	-0.126415	1.04313	0.875311	Rv0209	1086	1	0.171745	0.00831025	0.0803324	0.033241	0.0221607	0.0831025	0.0166205	0.0277008	0.0138504	0.119114	0.0249307	0.00554017	0.0526316	0.0277008	0.105263	0.0470914	0.0415512	0.102493	0.00554017	0.0110803	0.130755	0.342541	0.167587	0.359116	0.701657	0.510129	0.1084	0.483	0.094	0.4549	0.214
Rv0210	0.898553	8.24426	0.745967	4.99392	5.01449	4.68978	5.28673	0.596948	6.78381	9.3244	-0.363381	0	-0.367356	1.11332	0.634371	Rv0210	1479	1	0.174797	0.00406504	0.050813	0.0589431	0.0142276	0.0691057	0.0162602	0.0284553	0.0101626	0.117886	0.0101626	0.0142276	0.0447154	0.0325203	0.109756	0.0447154	0.0487805	0.130081	0.0121951	0.00813008	0.135903	0.308316	0.169709	0.386072	0.694388	0.478026	0.1343	0.3889	0.0909	0.5229	0.253
Rv0211	7.05099	14.3272	1.04396	9.57469	9.35764	8.87783	10.1933	1.31544	6.78992	4.30357	0.892005	0	0.0748399	0.969116	1.07657	pckA	1821	1	0.0891089	0.0148515	0.0709571	0.0709571	0.0429043	0.0957096	0.019802	0.039604	0.0462046	0.0808581	0.0313531	0.0363036	0.0610561	0.0231023	0.0511551	0.0429043	0.0594059	0.0643564	0.0330033	0.0264026	0.192202	0.310818	0.166941	0.330038	0.640857	0.477759	0.0996	0.5809	0.0843	0.4867	0.364
Rv0212c	0.41006	9.42346	1.24133	5.69634	5.42986	4.7514	6.57443	1.82303	6.77215	3.65399	0.547195	0	0.21545	1.02588	1.21718	nadR	972	0	0.117647	0.0185759	0.0588235	0.0681115	0.0433437	0.0743034	0.0247678	0.0371517	0.0216718	0.0866873	0.0154799	0.0123839	0.0681115	0.0278638	0.0990712	0.0278638	0.0588235	0.0959752	0.0340557	0.00928793	0.165638	0.323045	0.177984	0.333333	0.656379	0.501029	0.1407	0.4926	0.1496	0.4091	0.251
Rv0213c	0	7.50264	1.09722	4.91954	4.68139	4.11625	5.90697	1.79071	6.76984	2.96833	0.0812977	0.00223714	-0.0254436	1.12267	0.976283	Rv0213c	1314	0	0.114416	0.0114416	0.0800915	0.0434783	0.0434783	0.0709382	0.01373	0.0503432	0.02746	0.0915332	0.0183066	0.020595	0.0411899	0.0411899	0.0709382	0.0617849	0.0549199	0.0938215	0.01373	0.0366133	0.18417	0.317352	0.197108	0.30137	0.618721	0.51446	0.1417	0.5428	0.1231	0.4051	0.249
Rv0214	2.8316	8.6144	0.741765	5.22038	5.24819	4.71852	5.67387	0.955351	6.78565	4.13289	0.327866	0	-0.341515	1.08328	0.660211	fadD4	1614	1	0.10987	0.00931099	0.0614525	0.0577281	0.0260708	0.0893855	0.0335196	0.0465549	0.0297952	0.0837989	0.0372439	0.0223464	0.0707635	0.027933	0.0595903	0.0558659	0.0428305	0.0744879	0.018622	0.0428305	0.19083	0.319083	0.175341	0.314746	0.633829	0.494424	0.1166	0.5381	0.1315	0.4312	0.283
Rv0215c	2.15527	7.34995	0.629449	5.83612	5.91635	5.53016	6.264	0.733841	6.78945	7.95118	-1.52642	0	-0.382847	1.0123	0.618879	Rv0215c	1138	0	NA	NA	NA	NA	NA	NA	NA	NA	NA	NA	NA	NA	NA	NA	NA	NA	NA	NA	NA	NA	0.195079	0.304921	0.155536	0.344464	0.649385	0.460457	NA	NA	NA	NA	NA
Rv0216	0	7.4272	0.655114	5.29671	5.34254	4.97767	5.67433	0.69666	6.78719	9.60993	-1.21659	0.00111857	-0.417957	1.07307	0.583769	Rv0216	1014	1	0.133531	0.0118694	0.0771513	0.0207715	0.0296736	0.103858	0.0385757	0.0267062	0.0148368	0.118694	0.0118694	0.0148368	0.0652819	0.0237389	0.074184	0.0593472	0.0593472	0.074184	0.0178042	0.0237389	0.154832	0.316568	0.184418	0.344181	0.66075	0.500986	0.1688	0.4026	0.1183	0.4783	0.244
Rv0217c	2.79007	7.71083	0.604847	5.3669	5.37272	5.05969	5.72879	0.669103	6.78923	5.29775	-0.230223	0	-0.458998	1.06384	0.542729	lipW	909	0	0.142384	0.013245	0.0596026	0.0298013	0.0231788	0.0993377	0.0198675	0.0298013	0	0.119205	0.0165563	0.0298013	0.0761589	0.0231788	0.0960265	0.0496689	0.0397351	0.0860927	0.0165563	0.0298013	0.156216	0.346535	0.171617	0.325633	0.672167	0.518152	0.13	0.4874	0.1625	0.3593	0.235
Rv0218	2.46785	7.89917	0.795881	4.42566	4.35481	3.90416	4.86116	0.957	6.78023	6.28897	1.14062	0	-0.386185	1.18207	0.615541	Rv0218	1329	1	0.117647	0.00678733	0.0339367	0.0248869	0.0384615	0.108597	0.020362	0.0520362	0.0158371	0.142534	0.00904977	0.0135747	0.0791855	0.0271493	0.0723982	0.040724	0.0497738	0.0972851	0.0294118	0.020362	0.127163	0.312265	0.201655	0.358916	0.671181	0.51392	0.1266	0.4025	0.0765	0.5481	0.235
Rv0219	0	7.09171	0.762784	3.67285	3.68822	3.28974	4.05559	0.765857	6.77144	7.29377	-0.152748	0.00559284	-0.510631	1.27342	0.491095	Rv0219	549	1	0.159341	0.00549451	0.0384615	0.021978	0.0384615	0.0659341	0.0164835	0.0604396	0.00549451	0.137363	0.010989	0.0164835	0.0549451	0.0274725	0.104396	0.043956	0.043956	0.0824176	0.0274725	0.0384615	0.143898	0.327869	0.191257	0.336976	0.664845	0.519126	0.0788	0.4485	0.1088	0.5294	0.238
Rv0220	5.20209	10.5807	0.789702	8.94059	9.11441	8.71174	9.43381	0.722074	6.79154	7.72749	-1.92687	0	-0.160266	0.949967	0.841461	lipC	1212	1	0.124069	0.00992556	0.0620347	0.0347395	0.0297767	0.0843672	0.0347395	0.0421836	0.0198511	0.0843672	0.00744417	0.0173697	0.0645161	0.0322581	0.111663	0.0545906	0.0372208	0.101737	0.0223325	0.0248139	0.155941	0.331683	0.187294	0.325083	0.656766	0.518977	0.1657	0.4888	0.1191	0.3974	0.273
Rv0221	3.18066	9.53063	0.910709	7.18869	7.27983	6.69707	7.82726	1.13019	6.78707	6.2122	-1.30306	0	-0.014624	0.925333	0.987103	Rv0221	1410	1	0.104478	0.00426439	0.0511727	0.0554371	0.0255864	0.0682303	0.0362473	0.0426439	0.0255864	0.117271	0.0298507	0.0319829	0.0682303	0.0234542	0.0831557	0.0575693	0.0533049	0.0810235	0.0170576	0.0234542	0.179433	0.307092	0.193617	0.319858	0.62695	0.500709	0.1579	0.4411	0.109	0.487	0.252
Rv0222	0	8.57216	0.966128	6.85888	6.98692	6.46267	7.50532	1.04265	6.78439	8.47651	-1.65699	0.00111857	0.0310202	0.935108	1.03275	echA1	789	1	0.164122	0.00381679	0.0496183	0.0763359	0.0267176	0.10687	0.00381679	0.0610687	0.0343511	0.103053	0.0229008	0.0343511	0.0534351	0.0114504	0.0687023	0.0381679	0.0572519	0.0687023	0.00763359	0.00763359	0.173638	0.288973	0.174905	0.362484	0.651458	0.463878	0.1712	0.4414	0.0769	0.4927	0.269
Rv0223c	3.54463	8.7463	0.78151	5.84121	5.85141	5.33818	6.28786	0.949683	6.78677	3.84737	0.259754	0	-0.230294	1.0118	0.771432	Rv0223c	1464	0	0.131417	0.0102669	0.0451745	0.063655	0.0349076	0.104723	0.00616016	0.0657084	0.0390144	0.0595483	0.0287474	0.0308008	0.0698152	0.026694	0.036961	0.0492813	0.0698152	0.0882957	0.0143737	0.0246407	0.187842	0.314208	0.171448	0.326503	0.64071	0.485656	0.1266	0.5434	0.0969	0.4389	0.339
Rv0224c	1.49309	7.31855	0.89353	5.27294	5.41224	4.81699	5.91248	1.09548	6.78019	4.02186	-0.96378	0	-0.182707	1.07624	0.819019	Rv0224c	765	0	0.133858	0.00393701	0.0472441	0.0354331	0.0472441	0.106299	0.0314961	0.011811	0.011811	0.106299	0.0275591	0.015748	0.0708661	0.00787402	0.0826772	0.0551181	0.0551181	0.0866142	0.0275591	0.0354331	0.145098	0.335948	0.185621	0.333333	0.669281	0.521569	0.1101	0.4846	0.1436	0.4062	0.251
Rv0225	3.04265	8.52162	0.891622	6.96595	7.22087	6.59844	7.57295	0.974517	6.78678	6.25594	-1.56887	0	-0.0393258	0.930948	0.962401	Rv0225	1155	1	0.104167	0.0078125	0.0520833	0.0390625	0.0104167	0.09375	0.0416667	0.0364583	0.0104167	0.122396	0.0130208	0.0078125	0.0494792	0.0416667	0.104167	0.0755208	0.0260417	0.114583	0.0286458	0.0208333	0.142857	0.298701	0.193939	0.364502	0.663203	0.492641	0.1471	0.3994	0.1146	0.5	0.208
Rv0226c	1.19672	8.25499	1.01931	5.52142	5.7639	4.98307	6.20494	1.22187	6.77706	4.52157	-0.944221	0	-0.0253216	1.04463	0.976405	Rv0226c	1731	0	0.182292	0.0104167	0.0295139	0.0138889	0.015625	0.107639	0.0208333	0.0104167	0.00694444	0.154514	0.0173611	0.00868056	0.0625	0.015625	0.0590278	0.0555556	0.0642361	0.111111	0.0381944	0.015625	0.117273	0.32409	0.187753	0.370884	0.694974	0.511843	0.1183	0.3645	0.1417	0.4636	0.211
Rv0227c	3.08331	10.7263	1.07869	8.1045	8.38676	7.42782	8.79364	1.36582	6.78638	4.03043	-0.884375	0	0.15083	0.927859	1.15256	Rv0227c	1266	0	0.106888	0.0023753	0.0760095	0.0617577	0.0332542	0.0783848	0.0166271	0.0308789	0.0308789	0.087886	0.0118765	0.0261283	0.0855107	0.0356295	0.0617577	0.0570071	0.0902613	0.0665083	0.00712589	0.0332542	0.196682	0.353081	0.150079	0.300158	0.653239	0.50316	0.1058	0.5404	0.1257	0.433	0.272
Rv0228	0.415797	8.02289	0.975456	5.59966	5.57503	5.08887	6.21044	1.12157	6.77854	7.11032	-1.08449	0	-0.0603016	1.03576	0.941425	Rv0228	1224	1	0.157248	0.004914	0.022113	0.02457	0.046683	0.0909091	0.02457	0.031941	0.002457	0.127764	0.02457	0.00982801	0.0761671	0.017199	0.0712531	0.0540541	0.0540541	0.108108	0.031941	0.019656	0.110294	0.319444	0.197712	0.372549	0.691993	0.517157	0.0929	0.3907	0.0813	0.5643	0.268
Rv0229c	4.43244	9.6577	0.86823	7.7768	7.83263	7.21167	8.42513	1.21346	6.78934	3.1736	-0.401453	0	-0.0552969	0.923527	0.94643	Rv0229c	681	0	0.153285	0.00729927	0.0583942	0.0583942	0.0145985	0.0583942	0.0291971	0.0656934	0.0218978	0.124088	0.0145985	0.00729927	0.0364964	0.0437956	0.0948905	0.0510949	0.0510949	0.0729927	0.0145985	0.0218978	0.202643	0.320117	0.17768	0.299559	0.619677	0.497797	0.1724	0.4741	0.1404	0.4	0.23
Rv0230c	4.32021	10.3917	0.831777	7.04242	7.02364	6.47945	7.53921	1.05976	6.78878	3.59283	0.350514	0	-0.0968344	0.928612	0.904892	php	981	0	0.095092	0.0153374	0.0766871	0.0613497	0.0276074	0.095092	0.0460123	0.0705521	0.0214724	0.0828221	0.0306748	0.0245399	0.0490798	0.0306748	0.0674847	0.0184049	0.0613497	0.0858896	0.00613497	0.0337423	0.191641	0.352701	0.149847	0.30581	0.658512	0.502548	0.0576	0.6727	0.0909	0.411	0.313
Rv0231	1.8653	8.72292	1.0016	6.25505	6.35673	5.68942	6.9586	1.26919	6.78185	4.82174	-0.967411	0	0.0277881	0.973816	1.02951	fadE4	1707	1	0.125	0.00704225	0.0704225	0.0545775	0.0528169	0.068662	0.0316901	0.0422535	0.0316901	0.0897887	0.0228873	0.0352113	0.0369718	0.0264085	0.068662	0.0475352	0.0545775	0.0721831	0.0158451	0.0457746	0.190393	0.33802	0.173989	0.297598	0.635618	0.512009	0.0996	0.6286	0.0858	0.4167	0.3
Rv0232	2.64006	12.6531	1.18076	7.86899	7.89275	7.15678	8.60137	1.44459	6.7841	4.76449	-0.217201	0	0.256454	0.924305	1.25818	Rv0232	690	1	0.161572	0	0.0786026	0.0567686	0.0480349	0.0436681	0.0349345	0.0349345	0.00873362	0.122271	0.0174672	0.0131004	0.0567686	0.0218341	0.104803	0.0480349	0.0436681	0.069869	0.00873362	0.0262009	0.150725	0.352174	0.178261	0.318841	0.671014	0.530435	0.1281	0.5123	0.0847	0.4615	0.302
Rv0233	4.18581	13.0739	1.09872	7.76914	7.67122	7.08581	8.35545	1.26963	6.78589	5.23659	0.691345	0	0.175253	0.923466	1.17698	nrdB	945	1	0.127389	0.0127389	0.089172	0.0732484	0.0509554	0.0573248	0.022293	0.0414013	0.022293	0.0923567	0.0318471	0.022293	0.0414013	0.0318471	0.0859873	0.044586	0.0573248	0.0382166	0.022293	0.0350318	0.18836	0.33545	0.162963	0.313228	0.648677	0.498413	0.07	0.6031	0.1161	0.4645	0.284
Rv0234c	2.93678	9.7009	0.659666	6.7623	6.75093	6.36163	7.20914	0.84751	6.79078	7.3356	-0.671509	0	-0.280136	0.939802	0.721591	gabD1	1536	0	0.166341	0.0136986	0.0645793	0.0508806	0.0410959	0.0802348	0.0136986	0.0469667	0.0313112	0.0684932	0.0195695	0.0293542	0.0547945	0.0293542	0.0645793	0.0430528	0.0645793	0.0841487	0.0117417	0.0215264	0.180339	0.343099	0.151693	0.32487	0.667969	0.494792	0.0799	0.5868	0.1097	0.4218	0.266
Rv0235c	0	7.48817	1.00161	5.10931	5.10083	4.43157	5.89269	1.46112	6.77499	3.65361	-0.381503	0.00223714	-0.0965752	1.09819	0.905151	Rv0235c	1449	0	0.107884	0.0103734	0.0186722	0.0311203	0.060166	0.0580913	0.026971	0.0435685	0.0145228	0.134855	0.0248963	0.0248963	0.0829876	0.033195	0.0705394	0.060166	0.0497925	0.0622407	0.0497925	0.0352697	0.15528	0.322981	0.217391	0.304348	0.627329	0.540373	0.1103	0.4363	0.1413	0.5059	0.257
Rv0236A	5.71878	11.8059	0.977962	9.39086	9.61169	8.89073	10.0837	1.19294	6.79007	3.76215	-0.95857	0	0.0149265	0.963036	1.01665	Rv0236A	174	0	0.122807	0	0.0350877	0.0175439	0.0175439	0.105263	0	0.0350877	0.0350877	0.105263	0.0350877	0.0526316	0.0877193	0.0350877	0.0526316	0.0877193	0.0175439	0.140351	0	0.0175439	0.172414	0.304598	0.178161	0.344828	0.649425	0.482759	0.1	0.44	0.125	0.4783	0.24
Rv0236c	2.76085	8.49627	0.96221	6.41306	6.62614	5.79977	7.10497	1.3052	6.78379	3.61734	-0.843725	0	0.000805702	0.961404	1.00253	aftD	4203	0	0.15	0.005	0.0435714	0.0228571	0.0207143	0.0921429	0.0171429	0.0271429	0.00642857	0.116429	0.0121429	0.0171429	0.0907143	0.0321429	0.0707143	0.06	0.0728571	0.101429	0.0292857	0.0121429	0.127528	0.355698	0.157982	0.358791	0.71449	0.513681	0.0851	0.4455	0.0881	0.5004	0.255
Rv0237	2.24822	9.23746	1.11445	6.96911	7.14636	6.47502	7.68209	1.20707	6.78171	5.30922	-1.18245	0	0.18361	0.930842	1.18534	lpqI	1167	1	0.128866	0.00773196	0.0747423	0.0257732	0.0206186	0.121134	0.0154639	0.0309278	0.0154639	0.0979381	0.0154639	0.0103093	0.0773196	0.0283505	0.0670103	0.064433	0.0721649	0.110825	0.00257732	0.0128866	0.143959	0.32048	0.169666	0.365895	0.686375	0.490146	0.1384	0.4153	0.092	0.4936	0.265
Rv0238	6.31052	10.0195	0.647223	8.35529	8.45726	8.01829	8.80499	0.786697	6.79265	3.18195	-0.691608	0	-0.287293	0.934516	0.714433	Rv0238	615	1	0.127451	0.00490196	0.0588235	0.0686275	0.0343137	0.0735294	0.0147059	0.0539216	0.0245098	0.0931373	0.0539216	0.0294118	0.0245098	0.0441176	0.0735294	0.0588235	0.0539216	0.0686275	0.00980392	0.0294118	0.188618	0.310569	0.173984	0.326829	0.637398	0.484553	0.1043	0.5706	0.0769	0.4759	0.338
Rv0239	6.76558	12.4064	0.795518	9.37696	9.30942	8.81519	9.93611	1.12092	6.79212	3.14907	0.229758	0	-0.167074	0.962592	0.834652	vapB24	234	1	0.103896	0	0.0519481	0.116883	0.012987	0.025974	0.038961	0.025974	0.012987	0.0779221	0.038961	0.012987	0.0779221	0.038961	0.155844	0.025974	0.0649351	0.0649351	0.025974	0.025974	0.188034	0.320513	0.15812	0.333333	0.653846	0.478632	0.2034	0.4237	0.1148	0.4746	0.22
Rv0240	2.72264	8.92614	1.05256	6.8342	6.82475	6.19029	7.52555	1.33526	6.78338	3.46085	-0.461251	0	0.116325	0.936232	1.11805	vapC24	438	1	0.124138	0.0275862	0.062069	0.0689655	0.0482759	0.0413793	0.0206897	0.0344828	0	0.117241	0.0206897	0.0551724	0.0482759	0.0206897	0.110345	0.0206897	0.062069	0.0827586	0.0206897	0.0137931	0.16895	0.312785	0.203196	0.315068	0.627854	0.515982	0.1732	0.4567	0.1215	0.4608	0.203
Rv0241c	4.01312	9.81057	0.991396	7.93878	8.07077	7.34388	8.64277	1.29889	6.78764	3.28668	-0.608376	0	0.0664139	0.924982	1.06814	htdX	843	0	0.132143	0	0.0357143	0.0285714	0.0392857	0.0714286	0.0321429	0.0357143	0.0321429	0.0964286	0.0178571	0.0428571	0.0964286	0.0285714	0.0678571	0.025	0.0821429	0.1	0.00714286	0.0285714	0.177936	0.355872	0.158956	0.307236	0.663108	0.514828	0.0884	0.502	0.1027	0.486	0.272
Rv0242c	5.03986	10.568	1.00902	8.12196	8.14865	7.4054	8.86404	1.45865	6.78788	2.66556	-0.204964	0	0.0807698	0.928252	1.0825	fabG4	1365	0	0.145374	0.00440529	0.0528634	0.0484581	0.0264317	0.125551	0.0110132	0.0506608	0.030837	0.0991189	0.0132159	0.0374449	0.0462555	0.0242291	0.0638767	0.0528634	0.0638767	0.0814978	0.00881057	0.0132159	0.167766	0.341392	0.152381	0.338462	0.679853	0.493773	0.093	0.5678	0.0897	0.4157	0.306
Rv0243	6.5406	12.4241	1.01219	9.28901	9.39659	8.61139	9.97242	1.36102	6.78971	2.73923	-0.14442	0	0.0523442	0.959843	1.05407	fadA2	1323	1	0.163636	0.00909091	0.0659091	0.0431818	0.0295455	0.1	0.0159091	0.0272727	0.0340909	0.118182	0.0204545	0.0340909	0.0409091	0.0295455	0.0681818	0.0659091	0.0454545	0.0613636	0.00454545	0.0227273	0.164777	0.328042	0.156463	0.350718	0.67876	0.484505	0.094	0.5091	0.0767	0.5059	0.274
Rv0244c	5.5289	14.9169	1.43593	8.56186	8.36885	7.56718	9.51538	1.94821	6.78203	4.53261	0.78375	0	0.495359	0.940567	1.49709	fadE5	1836	0	0.119476	0.00163666	0.0605565	0.0621931	0.0458265	0.0981997	0.0245499	0.0327332	0.0507365	0.0949264	0.0310966	0.0229133	0.0310966	0.0425532	0.0409165	0.0490998	0.0556465	0.096563	0.0130933	0.0261866	0.188453	0.317538	0.168845	0.325163	0.642702	0.486383	0.0816	0.6204	0.0886	0.4383	0.355
Rv0245	5.21496	9.98051	0.747889	7.72125	7.69436	7.23442	8.1709	0.936485	6.79101	3.65693	0.121102	0	-0.175223	0.923111	0.826504	Rv0245	489	1	0.104938	0.00617284	0.037037	0.0432099	0.0432099	0.0802469	0.0246914	0.037037	0.0246914	0.0925926	0.0123457	0.0432099	0.0617284	0.0246914	0.0493827	0.0740741	0.0802469	0.148148	0.0123457	0	0.179959	0.316973	0.177914	0.325153	0.642127	0.494888	0.0833	0.4931	0.1269	0.4609	0.251
Rv0246	1.31042	8.60752	1.38202	5.77704	5.51711	4.69097	6.69443	2.00346	6.76723	2.44806	0.360743	0	0.363988	1.01803	1.36571	Rv0246	1311	1	0.158257	0.00917431	0.0252294	0.0137615	0.0389908	0.087156	0.0206422	0.0711009	0.0137615	0.123853	0.0137615	0.0252294	0.043578	0.0229358	0.0573394	0.0688073	0.0389908	0.137615	0.0183486	0.0114679	0.153318	0.291381	0.243326	0.311976	0.603356	0.534706	0.1945	0.4065	0.1585	0.3701	0.194
Rv0247c	4.3197	11.4805	1.06234	8.83721	8.95067	8.36327	9.46814	1.10487	6.7881	5.14621	-0.939581	0	0.114963	0.947372	1.11669	Rv0247c	747	0	0.0564516	0.0524194	0.0604839	0.0927419	0.0403226	0.0403226	0.016129	0.0443548	0.0483871	0.0645161	0.0403226	0.0362903	0.0524194	0.0403226	0.0927419	0.0483871	0.0564516	0.0846774	0.0120968	0.0201613	0.240964	0.294511	0.172691	0.291834	0.586345	0.467202	0.1211	0.5632	0.2123	0.3988	0.312
Rv0248c	5.36248	10.9891	0.791099	8.65182	8.8159	8.17391	9.17984	1.00593	6.79139	4.43782	-0.876803	0	-0.151885	0.942985	0.849841	Rv0248c	1941	0	0.102167	0.0123839	0.0572755	0.0758514	0.0309598	0.106811	0.0309598	0.0371517	0.0325077	0.0882353	0.0278638	0.0371517	0.0417957	0.0294118	0.0727554	0.0495356	0.0526316	0.0712074	0.0154799	0.0278638	0.202988	0.308089	0.158681	0.330242	0.638331	0.46677	0.0945	0.5577	0.1426	0.4347	0.301
Rv0249c	5.15923	12.539	0.856173	8.98297	9.04881	8.57795	9.37513	0.797187	6.79117	6.09443	0.280756	0	-0.0949039	0.951077	0.906823	Rv0249c	822	0	0.0805861	0.025641	0.014652	0.014652	0.0622711	0.0695971	0.040293	0.0586081	0.018315	0.106227	0.014652	0.025641	0.0659341	0.025641	0.0586081	0.0659341	0.0879121	0.0622711	0.040293	0.0622711	0.182482	0.315085	0.233577	0.268856	0.583942	0.548662	0.1653	0.4587	0.1487	0.4358	0.259
Rv0250c	6.29559	14.9001	1.19355	9.54378	9.63999	8.80355	10.2761	1.47258	6.78793	4.81931	0.36451	0	0.225479	0.968066	1.22721	Rv0250c	294	0	0.0927835	0.0103093	0.134021	0.0927835	0.0206186	0.0618557	0.0206186	0.0618557	0.0206186	0.103093	0.0103093	0.0103093	0.0412371	0.0103093	0.103093	0.0309278	0.0721649	0.0721649	0.0103093	0.0206186	0.217687	0.323129	0.163265	0.295918	0.619048	0.486395	0.119	0.5833	0.2	0.3188	0.265
Rv0251c	3.96297	18.2658	2.32673	8.02843	7.34268	6.45538	9.16324	2.70786	6.7571	5.12733	1.33509	0	1.4004	0.92633	2.40212	hsp	480	0	0.119497	0	0.106918	0.0566038	0.0314465	0.0691824	0.0188679	0.0440252	0.0314465	0.0628931	0.00628931	0.0188679	0.0628931	0.0251572	0.100629	0.0377358	0.0566038	0.0943396	0.0314465	0.0251572	0.177083	0.34375	0.15625	0.322917	0.666667	0.5	0.1185	0.6074	0.0992	0.3772	0.301
Rv0252	3.1275	10.7689	1.16602	6.10878	6.01904	5.27962	6.83418	1.55456	6.77786	3.86706	0.624173	0	0.179441	0.986579	1.18117	nirB	2562	1	0.114889	0.0234467	0.0750293	0.0515826	0.021102	0.112544	0.021102	0.0480657	0.0328253	0.101993	0.0128957	0.0164127	0.0363423	0.0304807	0.0679953	0.059789	0.049238	0.091442	0.00820633	0.024619	0.167447	0.307963	0.176425	0.348165	0.656128	0.484387	0.1289	0.5102	0.0926	0.471	0.264
Rv0253	0	9.57101	1.23835	5.66354	5.63815	4.93231	6.46819	1.53588	6.76893	4.72128	-0.462597	0.00447427	0.209262	1.02909	1.21099	nirD	357	1	0.101695	0.0169492	0.101695	0.00847458	0.0254237	0.110169	0.0169492	0.0423729	0.00847458	0.0847458	0.0254237	0.0169492	0.059322	0.0423729	0.0762712	0.059322	0.0338983	0.144068	0.00847458	0.0169492	0.142857	0.308123	0.210084	0.338936	0.647059	0.518207	0.1944	0.4537	0.1087	0.4023	0.284
Rv0254c	1.78013	8.02736	0.850154	5.47087	5.4556	4.96283	6.04477	1.08194	6.78335	3.85659	-0.133402	0	-0.200547	1.0507	0.801179	cobU	525	0	0.155172	0.0172414	0.0689655	0.0402299	0.00574713	0.0862069	0.0229885	0.0287356	0.0114943	0.126437	0.0114943	0.0114943	0.045977	0	0.0747126	0.0517241	0.0747126	0.132184	0.0229885	0.0114943	0.139048	0.32	0.188571	0.352381	0.672381	0.508571	0.1313	0.4562	0.1241	0.4071	0.204
Rv0255c	0.71855	7.8791	0.779518	5.68519	5.73583	5.30156	6.14373	0.842169	6.78496	11.4514	-1.64418	0	-0.247439	1.02696	0.754288	cobQ1	1485	0	0.137652	0.01417	0.0728745	0.0465587	0.0303644	0.119433	0.0222672	0.0242915	0.01417	0.129555	0.0161943	0.0182186	0.0566802	0.01417	0.0910931	0.0404858	0.0425101	0.0850202	0.01417	0.0101215	0.1367	0.331313	0.16835	0.363636	0.694949	0.499663	0.1131	0.5	0.0934	0.4453	0.251
Rv0256c	3.77937	8.72393	0.753879	6.39068	6.4641	5.93295	6.91437	0.981418	6.78862	3.47685	-0.279615	0	-0.209177	0.963056	0.79255	PPE2	1671	0	0.185252	0	0.0305755	0.0323741	0.0341727	0.0791367	0.0125899	0.044964	0.0161871	0.0935252	0.0215827	0.028777	0.122302	0.0413669	0.0197842	0.0539568	0.0935252	0.0485612	0.0179856	0.0233813	0.175943	0.370437	0.153202	0.300419	0.670856	0.523639	0.1033	0.4752	0.1342	0.4394	0.267
Rv0257	3.25111	9.96413	1.28826	6.61499	6.3147	5.6453	7.65112	2.00582	6.77704	2.33374	0.441912	0	0.340249	0.948011	1.34198	Rv0257	375	1	0.0806452	0.0403226	0.0564516	0.00806452	0.00806452	0.120968	0.0322581	0.0241935	0.016129	0.104839	0.016129	0.00806452	0.0887097	0.0241935	0.0967742	0.120968	0.0564516	0.0645161	0.0322581	0	0.157333	0.296	0.221333	0.325333	0.621333	0.517333	0.2679	0.3214	0.19	0.3402	0.169
Rv0258c	0	8.56488	0.94052	5.44703	5.5888	4.8633	6.11829	1.25499	6.77969	4.05516	-0.604491	0.00111857	-0.113126	1.05365	0.888601	Rv0258c	456	0	0.10596	0.00662252	0.0397351	0.0331126	0.0331126	0.112583	0.00662252	0.0728477	0.0331126	0.10596	0.0529801	0.013245	0.0596026	0.0331126	0.0662252	0.0596026	0.0596026	0.0794702	0.00662252	0.0198675	0.184211	0.324561	0.186404	0.304825	0.629386	0.510965	0.1024	0.5512	0.1452	0.3628	0.262
Rv0259c	0	7.34825	1.00504	3.858	3.82314	3.32623	4.3798	1.05357	6.75876	4.56852	-0.00653069	0.00447427	-0.245829	1.25087	0.755898	Rv0259c	744	0	0.149798	0.00809717	0.048583	0.0283401	0.0242915	0.0769231	0.0364372	0.0283401	0	0.097166	0.0121457	0.0121457	0.0607287	0.0404858	0.109312	0.0647773	0.0728745	0.11336	0.0121457	0.00404858	0.155914	0.33871	0.182796	0.322581	0.66129	0.521505	0.1696	0.4107	0.1731	0.3731	0.224
Rv0260c	0	7.65938	1.45098	3.04037	2.92428	1.9906	3.82534	1.83474	6.67594	3.36609	0.57707	0.0178971	0.100299	1.35068	1.10203	Rv0260c	1146	0	0.136483	0.0104987	0.0603675	0.0577428	0.0209974	0.0839895	0.0288714	0.0472441	0.0209974	0.11811	0.0131234	0.0104987	0.0577428	0.0183727	0.0918635	0.0682415	0.0472441	0.0839895	0.0131234	0.0104987	0.165794	0.318499	0.185864	0.329843	0.648342	0.504363	0.1437	0.4371	0.164	0.4181	0.243
Rv0261c	0	7.73467	1.00758	3.36667	3.3105	2.76573	3.87346	1.10772	6.74976	4.48175	0.518364	0.0033557	-0.303204	1.31078	0.698523	narK3	1410	0	0.134328	0.00852878	0.0170576	0.0255864	0.0575693	0.121535	0.0127932	0.0597015	0.0149254	0.127932	0.0255864	0.0298507	0.0362473	0.021322	0.0405117	0.0788913	0.0554371	0.0746269	0.0255864	0.0319829	0.144681	0.31773	0.216312	0.321277	0.639007	0.534043	0.1154	0.5072	0.0916	0.4431	0.288
Rv0262c	2.77659	9.73487	0.730589	7.01883	6.96833	6.58253	7.42684	0.844305	6.79018	6.37599	-0.177379	0	-0.198693	0.929281	0.803034	aac	546	0	0.121547	0.0110497	0.0773481	0.0331492	0.0165746	0.0883978	0.0497238	0.0441989	0	0.0939227	0.0276243	0.00552486	0.0331492	0.038674	0.0939227	0.0497238	0.0718232	0.0828729	0.038674	0.0220994	0.161172	0.336996	0.157509	0.344322	0.681319	0.494505	0.0955	0.535	0.1022	0.4419	0.306
Rv0263c	1.64301	10.5905	1.06251	6.40253	6.36428	5.75513	6.99204	1.23691	6.78195	5.48186	0.461062	0	0.100329	0.962177	1.10206	Rv0263c	903	0	0.08	0.00333333	0.08	0.0366667	0.00666667	0.116667	0.0333333	0.0466667	0.00333333	0.09	0.0166667	0.02	0.0833333	0.0333333	0.0933333	0.0466667	0.0566667	0.116667	0.02	0.0166667	0.168328	0.341085	0.148394	0.342193	0.683278	0.48948	0.0899	0.5094	0.1494	0.4097	0.244
Rv0264c	2.01034	11.2793	0.990761	6.45918	6.40782	5.98564	6.86498	0.879341	6.78413	8.20847	0.875061	0	0.0326505	0.958111	1.03438	Rv0264c	633	0	0.166667	0.0190476	0.0952381	0.0142857	0.0190476	0.0666667	0.0190476	0.0333333	0.0047619	0.0904762	0.0238095	0.0047619	0.0714286	0.0333333	0.0857143	0.047619	0.0666667	0.0904762	0.0238095	0.0238095	0.156398	0.361769	0.153239	0.328594	0.690363	0.515008	0.0794	0.5397	0.142	0.3871	0.231
Rv0265c	4.65158	9.87862	0.54843	6.83289	6.8503	6.54779	7.14304	0.595243	6.79247	6.08495	0.0225037	0	-0.387863	0.936293	0.613863	Rv0265c	993	0	0.157576	0.00606061	0.069697	0.0333333	0.0393939	0.0757576	0.0121212	0.0636364	0.0393939	0.0787879	0.0121212	0.0151515	0.069697	0.0666667	0.0545455	0.0484848	0.0424242	0.0818182	0.0242424	0.00909091	0.172205	0.322256	0.165156	0.340383	0.662638	0.487412	0.1026	0.5055	0.0929	0.5161	0.282
Rv0266c	1.32024	9.30925	0.788031	5.58866	5.51132	5.17156	5.90894	0.737379	6.78542	8.34749	0.0408699	0	-0.248931	1.03696	0.752796	oplA	3630	0	0.115798	0.00578991	0.0620347	0.0554177	0.0314309	0.110008	0.025641	0.0421836	0.00909843	0.0810587	0.0264682	0.0297767	0.0504549	0.0272953	0.0926385	0.0479735	0.0694789	0.0885029	0.00578991	0.0231596	0.163361	0.34573	0.149587	0.341322	0.687052	0.495317	0.0736	0.5717	0.0858	0.4475	0.281
Rv0267	0	7.91745	2.00575	3.62932	2.69982	2.11615	5.95399	3.83784	6.65019	1.99014	0.721471	0.00447427	0.727033	1.27872	1.72876	narU	1392	1	0.146868	0.00863931	0.0259179	0.0194384	0.0734341	0.105832	0.0151188	0.0647948	0.0194384	0.0950324	0.0259179	0.0259179	0.0539957	0.0215983	0.0410367	0.0647948	0.0410367	0.0971922	0.0323974	0.0215983	0.130029	0.31681	0.215517	0.337644	0.654454	0.532328	0.1054	0.5221	0.0476	0.4985	0.301
Rv0268c	5.34003	11.8527	0.871637	8.47741	8.3857	7.85906	9.05309	1.19403	6.79044	3.61276	0.264509	0	-0.0664937	0.93813	0.935233	Rv0268c	510	0	0.0769231	0.0177515	0.0532544	0.0710059	0	0.0532544	0.0591716	0.0236686	0.0236686	0.112426	0.0295858	0.0118343	0.0532544	0.0177515	0.177515	0.0946746	0.0532544	0.0473373	0.0118343	0.0118343	0.207843	0.319608	0.172549	0.3	0.619608	0.492157	0.2222	0.4028	0.219	0.3233	0.181
Rv0269c	0	9.93977	0.769737	5.63568	5.66193	5.2953	6.08678	0.791477	6.7854	10.6067	-0.839032	0.00111857	-0.262191	1.03193	0.739536	Rv0269c	1194	0	0.138539	0.00755668	0.0730479	0.0528967	0.02267	0.0604534	0.0251889	0.0352645	0.0277078	0.0780856	0.0251889	0.0176322	0.0806045	0.0277078	0.0957179	0.0428212	0.0302267	0.103275	0.0302267	0.0251889	0.144891	0.325796	0.162479	0.366834	0.69263	0.488275	0.1054	0.494	0.0423	0.5563	0.227
Rv0270	6.341	10.919	0.664275	8.54229	8.49117	8.13953	8.92635	0.786815	6.79269	3.88783	0.228645	0	-0.275738	0.940013	0.725989	fadD2	1683	1	0.105357	0	0.0571429	0.0625	0.0321429	0.1	0.0196429	0.0589286	0.0553571	0.103571	0.0160714	0.0321429	0.0642857	0.0196429	0.0571429	0.0589286	0.0446429	0.0839286	0.00357143	0.025	0.184789	0.319667	0.168746	0.326797	0.646465	0.488414	0.1017	0.5572	0.0658	0.4917	0.273
Rv0271c	4.63486	11.4465	0.83792	7.05628	7.05672	6.50016	7.6294	1.12924	6.78871	4.83088	0.41706	0	-0.0903184	0.928238	0.911408	fadE6	2196	0	0.146375	0.00683995	0.0533516	0.0615595	0.0328317	0.0793434	0.0177839	0.0506156	0.0259918	0.0943912	0.0136799	0.0164159	0.0547196	0.0410397	0.0629275	0.0560876	0.0656635	0.0793434	0.0191518	0.0218878	0.167577	0.328324	0.165301	0.338798	0.667122	0.493625	0.106	0.5057	0.0903	0.4955	0.303
Rv0272c	3.76639	11.239	0.779471	6.6406	6.79127	6.11223	7.13319	1.02096	6.78871	5.62194	-0.0983751	0	-0.167024	0.946496	0.834702	Rv0272c	1134	0	0.137931	0.0106101	0.0636605	0.0424403	0.0318302	0.0822281	0.0291777	0.0450928	0.0238727	0.066313	0.0212202	0.0238727	0.066313	0.0318302	0.0822281	0.0583554	0.061008	0.0689655	0.0238727	0.0291777	0.181658	0.343915	0.167549	0.306878	0.650794	0.511464	0.1512	0.5463	0.131	0.3553	0.312
Rv0273c	3.99623	11.9187	0.757668	6.49612	6.49555	6.07683	6.81038	0.733549	6.78909	9.14575	1.08714	0	-0.197908	0.955576	0.803819	Rv0273c	621	0	0.15534	0.0194175	0.0679612	0.0436893	0.0339806	0.038835	0.0145631	0.0631068	0.0194175	0.0485437	0.0242718	0.0339806	0.0242718	0.0679612	0.0970874	0.0728155	0.0485437	0.0533981	0.0145631	0.0582524	0.20934	0.328502	0.172303	0.289855	0.618357	0.500805	0.1163	0.5756	0.1513	0.4101	0.304
Rv0274	4.50346	10.1305	0.837504	7.10186	7.12351	6.56566	7.60711	1.04145	6.78873	3.46842	0.10539	0	-0.0896051	0.92711	0.912121	Rv0274	582	1	0.103627	0.015544	0.0880829	0.0310881	0.0725389	0.0777202	0.0362694	0.0414508	0.0310881	0.0569948	0.0207254	0.0362694	0.0725389	0.0310881	0.0518135	0.0518135	0.0569948	0.0932642	0.0103627	0.0207254	0.185567	0.312715	0.19244	0.309278	0.621993	0.505155	0.1657	0.503	0.0889	0.4882	0.308
Rv0275c	4.90488	13.2112	1.31554	8.01396	7.74013	7.12337	8.62015	1.49678	6.78278	4.08658	1.00898	0	0.38946	0.926077	1.39119	Rv0275c	726	0	0.161826	0.00414938	0.0705394	0.0414938	0.0290456	0.0580913	0.0207469	0.0290456	0.0165975	0.0912863	0.0124481	0.0207469	0.0497925	0.0456432	0.103734	0.06639	0.0705394	0.0871369	0.00829876	0.0124481	0.168044	0.366391	0.151515	0.31405	0.680441	0.517906	0.109	0.5403	0.1263	0.3874	0.294
Rv0276	5.4973	12.2093	1.11002	8.97849	8.95207	8.19148	9.7822	1.59072	6.78804	2.9492	0.0938104	0	0.159063	0.950959	1.16079	Rv0276	921	1	0.104575	0.00326797	0.0686275	0.0424837	0.0359477	0.0653595	0.0261438	0.0326797	0.0163399	0.0980392	0.0457516	0.0163399	0.0784314	0.0326797	0.124183	0.0359477	0.0359477	0.0882353	0.0163399	0.0326797	0.153094	0.319218	0.178067	0.34962	0.668838	0.497286	0.1274	0.4595	0.0606	0.5475	0.27
Rv0277A	4.46909	13.3933	1.12705	10.2618	10.4281	9.87615	11.0084	1.13221	6.78927	6.51462	-1.39488	0	0.13212	0.994926	1.13385	vapB25	258	0	NA	NA	NA	NA	NA	NA	NA	NA	NA	NA	NA	NA	NA	NA	NA	NA	NA	NA	NA	NA	0.174419	0.337209	0.170543	0.317829	0.655039	0.507752	NA	NA	NA	NA	NA
Rv0277c	4.41647	12.6807	1.21271	8.659	8.94718	7.96693	9.45118	1.48425	6.78546	3.51969	-0.704676	0	0.269539	0.943167	1.27127	vapC25	429	0	0.126761	0.0140845	0.084507	0.028169	0.0633803	0.028169	0.0633803	0.0492958	0.00704225	0.112676	0.00704225	0.0352113	0.0915493	0.00704225	0.0985915	0.0422535	0.0352113	0.0915493	0.0140845	0	0.181818	0.354312	0.195804	0.268065	0.622378	0.550117	0.1429	0.4662	0.2157	0.3789	0.203
Rv0278c	0.464003	8.16635	1.27266	3.73698	3.62585	2.96602	4.25691	1.29089	6.73812	4.44959	0.742369	0	0.0070558	1.2656	1.00878	Rv0278c	2874	0	0.170324	0.00417973	0.014629	0.00835946	0.0355277	0.393939	0.0125392	0.0282132	0.00104493	0.0606061	0.00626959	0.0543365	0.0177638	0.0219436	0.0355277	0.0470219	0.0491118	0.030303	0.00522466	0.0031348	0.116562	0.335769	0.112039	0.43563	0.771399	0.447808	0.095	0.6386	0.081	0.2587	0.258
Rv0279c	0.466035	9.45391	1.42404	5.13625	5.21192	4.27921	5.96256	1.68336	6.75475	3.58913	-0.0744965	0	0.329458	1.09459	1.33118	PE_PGRS4	2514	0	0.168459	0.00119474	0.0238949	0.0083632	0.037037	0.41816	0.00597372	0.0298686	0.00238949	0.0657109	0.00358423	0.0537634	0.0203106	0.0167264	0.00597372	0.0537634	0.0597372	0.0203106	0.00238949	0.00238949	0.118536	0.343278	0.105012	0.433174	0.776452	0.44829	0.0803	0.6786	0.0701	0.2376	0.289
Rv0280	2.42864	12.4886	2.10392	7.68654	7.53409	6.20243	8.64604	2.44361	6.75856	2.87344	0.457487	0	1.18103	0.922884	2.18276	PPE3	1611	1	0.216418	0	0.0578358	0.0447761	0.0317164	0.0858209	0.0205224	0.0354478	0.00373134	0.0652985	0.0279851	0.0149254	0.0932836	0.0279851	0.0391791	0.0652985	0.0615672	0.0652985	0.0186567	0.0242537	0.149597	0.333954	0.157045	0.359404	0.693358	0.490999	0.1255	0.4298	0.0974	0.5049	0.247
Rv0281	4.25863	12.4013	1.21218	8.75736	8.54305	8.11824	8.99537	0.877132	6.78644	5.52194	1.06107	0	0.266698	0.94548	1.26842	Rv0281	909	1	0.165563	0.00662252	0.0728477	0.0794702	0.0496689	0.0761589	0.0165563	0.0231788	0.0231788	0.0827815	0.00993377	0.013245	0.0596026	0.0264901	0.0827815	0.0430464	0.0463576	0.0728477	0.0231788	0.0264901	0.160616	0.325633	0.170517	0.343234	0.668867	0.49615	0.1614	0.5118	0.1097	0.4174	0.271
Rv0282	7.03762	13.9358	1.24652	10.4513	10.2618	9.63553	10.8937	1.25814	6.78875	3.70448	0.748081	0	0.243786	1.00274	1.24551	eccA3	1896	1	0.147385	0.00633914	0.0744849	0.0776545	0.0348653	0.0792393	0.0269414	0.0396197	0.0285261	0.101426	0.0126783	0.0237718	0.0316957	0.0237718	0.0792393	0.0522979	0.0554675	0.0792393	0.00792393	0.0174326	0.17616	0.316983	0.175633	0.331224	0.648207	0.492616	0.153	0.5187	0.0996	0.4361	0.281
Rv0283	4.79064	13.5621	1.33252	9.40147	9.16598	8.65411	9.93212	1.278	6.78584	4.00052	0.621088	0	0.369148	0.963376	1.37087	eccB3	1617	1	0.113383	0.00371747	0.0613383	0.0204461	0.0223048	0.109665	0.0167286	0.0408922	0.0148699	0.0947955	0.00929368	0.035316	0.0892193	0.0297398	0.0650558	0.0687732	0.0650558	0.105948	0.0130112	0.0204461	0.150278	0.327149	0.16945	0.353123	0.680272	0.496599	0.1141	0.444	0.0705	0.5287	0.283
Rv0284	4.35494	13.4225	1.32108	9.14659	8.9997	8.41563	9.68754	1.27191	6.78517	4.5823	0.134152	0	0.365476	0.955604	1.3672	eccC3	3993	1	0.114286	0.00150376	0.0684211	0.0511278	0.0300752	0.075188	0.0263158	0.0526316	0.0195489	0.116541	0.0172932	0.0210526	0.0759398	0.0323308	0.0857143	0.0548872	0.0556391	0.0691729	0.012782	0.0195489	0.1713	0.333083	0.17155	0.324067	0.65715	0.504633	0.1222	0.474	0.1057	0.4905	0.279
Rv0285	0.361182	11.9817	1.79418	8.7204	8.89513	8.26287	9.56602	1.30316	6.76997	7.25631	-1.5386	0	0.84954	0.944638	1.85127	PE5	309	1	0.284314	0	0.0196078	0.0686275	0.00980392	0.127451	0.0196078	0.00980392	0	0.0686275	0.00980392	0	0.0490196	0.0196078	0.0294118	0.0588235	0.0588235	0.147059	0	0.0196078	0.122977	0.304207	0.145631	0.427184	0.731392	0.449838	0.1304	0.3804	0.1064	0.4731	0.289
Rv0286	3.02676	12.3185	1.4469	9.05859	9.13284	8.20887	9.98571	1.77684	6.782	5.19544	-0.82029	0	0.493775	0.953123	1.4955	PPE4	1542	1	0.212476	0	0.0272904	0.0292398	0.0292398	0.120858	0.0136452	0.037037	0.00779727	0.0916179	0.0233918	0.0253411	0.0838207	0.0331384	0.0331384	0.0623782	0.0604288	0.0526316	0.0331384	0.0233918	0.142672	0.30869	0.178988	0.36965	0.67834	0.487678	0.1696	0.3705	0.0946	0.5	0.228
Rv0287	2.50347	13.8601	1.69946	10.6281	10.6998	9.88683	11.5967	1.7099	6.78154	6.52034	-1.21842	0	0.689228	1.01023	1.69095	esxG	294	1	0.309278	0	0.0309278	0.0309278	0.0515464	0.0618557	0.0412371	0.0206186	0.0206186	0.0721649	0.0309278	0.0206186	0.0103093	0.0824742	0.0206186	0.0721649	0.0515464	0.0515464	0	0.0206186	0.142857	0.29932	0.20068	0.357143	0.656463	0.5	0.2346	0.3457	0.0256	0.5921	0.227
Rv0288	3.60951	14.1862	1.59066	11.0083	11.112	10.4033	11.7241	1.32082	6.78437	6.31989	-1.16235	0	0.563792	1.02687	1.56552	esxH	291	1	0.208333	0	0.0416667	0.0520833	0	0.09375	0.03125	0.03125	0.0104167	0.0520833	0.09375	0.03125	0.0104167	0.09375	0.0208333	0.0520833	0.0625	0.0208333	0.0416667	0.0520833	0.216495	0.274914	0.158076	0.350515	0.62543	0.43299	0.1618	0.5147	0.1029	0.4615	0.278
Rv0289	3.9385	13.8336	1.49848	10.1394	10.1581	9.31159	10.8416	1.53005	6.78425	5.13827	-0.515254	0	0.508461	0.990021	1.51019	espG3	888	1	0.108475	0.0135593	0.0677966	0.0372881	0.0440678	0.0915254	0.00677966	0.0440678	0.0101695	0.0779661	0.0135593	0.0237288	0.0711864	0.0271186	0.0813559	0.0677966	0.0745763	0.105085	0.020339	0.0135593	0.148649	0.316441	0.189189	0.345721	0.662162	0.505631	0.1407	0.4525	0.0851	0.491	0.26
Rv0290	1.72161	13.6275	1.68659	9.04631	9.0203	8.26566	9.91735	1.6517	6.77676	5.55207	-0.677605	0	0.733803	0.952785	1.73553	eccD3	1419	1	0.199153	0.00423729	0.029661	0.0190678	0.0211864	0.0826271	0.00423729	0.0529661	0.00635593	0.158898	0.0148305	0.00635593	0.0677966	0.0317797	0.0487288	0.0614407	0.0338983	0.122881	0.0190678	0.0148305	0.110641	0.310782	0.208598	0.369979	0.680761	0.51938	0.1189	0.3753	0.0837	0.5318	0.229
Rv0291	2.48137	13.7169	1.64817	8.94053	9.02155	8.08342	9.8927	1.80927	6.77727	5.17464	-0.710588	0	0.698206	0.949966	1.69993	mycP3	1386	1	0.175705	0.010846	0.0563991	0.0195228	0.0151844	0.10846	0.00867679	0.0368764	0.0151844	0.0694143	0.0130152	0.0303688	0.0932755	0.0303688	0.0477223	0.0780911	0.0607375	0.0997831	0.0195228	0.010846	0.149351	0.342713	0.149351	0.358586	0.701299	0.492063	0.1106	0.4519	0.1065	0.4647	0.26
Rv0292	1.32359	11.4073	1.57009	8.11387	8.18189	7.57511	8.75674	1.18163	6.77468	6.04622	-0.975553	0	0.642023	0.928068	1.64375	eccE3	996	1	0.160121	0.00906344	0.0543807	0.0271903	0.00906344	0.0634441	0.021148	0.0453172	0	0.10574	0.0060423	0.0181269	0.0725076	0.0181269	0.114804	0.0422961	0.0996979	0.0755287	0.0302115	0.0271903	0.148594	0.353414	0.164659	0.333333	0.686747	0.518072	0.1217	0.4342	0.1172	0.4574	0.215
Rv0293c	5.15253	10.529	0.86798	7.67203	7.77931	7.01343	8.23487	1.22143	6.78928	3.07492	0.0326508	0	-0.0548178	0.922798	0.946909	Rv0293c	1203	0	0.1125	0.0075	0.045	0.035	0.05	0.0725	0.0325	0.0425	0.02	0.1125	0.0225	0.0325	0.0725	0.02	0.0725	0.0775	0.05	0.07	0.02	0.0325	0.160432	0.334996	0.200333	0.304239	0.639235	0.535328	0.1445	0.4901	0.0858	0.465	0.258
Rv0294	0	7.4023	1.14363	4.67527	4.52522	3.78009	5.5764	1.79631	6.7649	2.56535	0.160315	0.00223714	-0.00836959	1.152	0.993357	tam	786	1	0.103448	0.00766284	0.0689655	0.0613027	0.0306513	0.0727969	0.0268199	0.0306513	0.0153257	0.0957854	0.0191571	0.0153257	0.0766284	0.0229885	0.0957854	0.0536398	0.0421456	0.0957854	0.0344828	0.0306513	0.157761	0.30916	0.183206	0.349873	0.659033	0.492366	0.1448	0.448	0.11	0.4896	0.258
Rv0295c	2.70767	8.95023	0.869874	7.18566	7.3823	6.80853	7.74476	0.936233	6.78758	8.86076	-1.95294	0	-0.0555137	0.925388	0.946213	Rv0295c	804	0	0.11236	0.00374532	0.071161	0.0449438	0.0224719	0.071161	0.0224719	0.0411985	0.011236	0.0861423	0.0149813	0.0262172	0.082397	0.0636704	0.093633	0.0449438	0.0524345	0.0786517	0.0374532	0.0187266	0.174129	0.333333	0.166667	0.325871	0.659204	0.5	0.1493	0.4887	0.1196	0.4394	0.276
Rv0296c	2.64458	8.67271	0.848375	6.57042	6.67434	6.06406	7.14902	1.08496	6.78708	3.60952	-0.558472	0	-0.10237	0.950745	0.899357	Rv0296c	1398	0	0.113978	0.00645161	0.0795699	0.055914	0.0301075	0.0623656	0.0387097	0.0344086	0.0150538	0.103226	0.00860215	0.0172043	0.0731183	0.0258065	0.083871	0.0537634	0.0709677	0.0623656	0.0150538	0.0494624	0.18598	0.351931	0.167382	0.294707	0.646638	0.519313	0.1293	0.5244	0.1392	0.4107	0.273
Rv0297	3.3162	11.0402	1.08154	7.4933	7.49615	6.91966	8.06488	1.14522	6.78492	5.49407	-0.28204	0	0.159205	0.92233	1.16093	PE_PGRS5	1776	1	0.186125	0	0.0304569	0.0101523	0.0236887	0.397631	0.0118443	0.0270728	0.00846024	0.0287648	0.00846024	0.0693739	0.0287648	0.0203046	0.00846024	0.0439932	0.0439932	0.0456853	0.00338409	0.00338409	0.123311	0.332207	0.106419	0.438063	0.77027	0.438626	0.1335	0.6584	0.0417	0.2444	0.335
Rv0298	6.15124	13.8615	0.863677	9.5543	9.60231	9.02516	10.0755	1.05037	6.79164	5.91985	0.341849	0	-0.104746	0.968422	0.896981	Rv0298	228	1	0.226667	0	0.08	0.0533333	0	0.0266667	0.0133333	0.0533333	0.04	0.08	0.0266667	0.04	0.0133333	0.04	0.0933333	0.04	0.0533333	0.08	0	0.04	0.214912	0.276316	0.153509	0.355263	0.631579	0.429825	0.1429	0.381	0.1167	0.5893	0.276
Rv0299	4.80671	10.6956	0.855104	9.01224	9.18369	8.5552	9.53038	0.975174	6.79103	4.7308	-0.984902	0	-0.0967547	0.951859	0.904972	Rv0299	303	1	0.17	0.02	0.04	0.06	0.01	0.07	0.03	0.04	0	0.14	0.02	0.03	0.08	0.02	0.06	0.03	0.04	0.12	0.01	0.01	0.135314	0.353135	0.184818	0.326733	0.679868	0.537954	0.1333	0.5	0.0952	0.4125	0.21
Rv0300	5.60515	11.421	0.768407	9.17759	9.31077	8.74314	9.66532	0.92218	6.7921	4.85658	-0.867895	0	-0.188097	0.956504	0.813629	vapB2	222	1	0.164384	0	0.109589	0.0273973	0	0.0547945	0	0.0547945	0	0.136986	0.0273973	0	0.0273973	0.0410959	0.164384	0.0410959	0.0547945	0.0684932	0.0136986	0.0136986	0.166667	0.283784	0.202703	0.346847	0.630631	0.486486	0.2462	0.3538	0.1311	0.4035	0.198
Rv0301	5.45137	10.546	0.866683	8.58217	8.68126	8.01251	9.19712	1.18461	6.79051	3.14891	-0.447649	0	-0.0744493	0.941132	0.927277	vapC2	426	1	0.0921986	0.0070922	0.070922	0.0851064	0.0212766	0.0567376	0.035461	0.0638298	0.0212766	0.120567	0.0212766	0.0070922	0.0638298	0.0212766	0.0992908	0.0567376	0.0780142	0.0567376	0.0141844	0.0070922	0.201878	0.314554	0.173709	0.309859	0.624413	0.488263	0.1345	0.4202	0.181	0.4673	0.258
Rv0302	3.29681	11.6511	0.961587	7.65221	7.65757	7.02637	8.22	1.19363	6.78774	4.66969	0.0753564	0	0.0388978	0.92269	1.04062	Rv0302	633	1	0.12381	0.0047619	0.0571429	0.0761905	0.0380952	0.052381	0.0238095	0.0428571	0.0285714	0.104762	0.0285714	0.0047619	0.052381	0.047619	0.0904762	0.0714286	0.052381	0.0666667	0.00952381	0.0238095	0.178515	0.331754	0.164297	0.325434	0.657188	0.496051	0.1053	0.5029	0.1111	0.4938	0.275
Rv0303	3.97117	10.1917	0.831576	6.24032	6.25011	5.70935	6.7124	1.00305	6.7869	4.47982	0.425525	0	-0.143479	0.975055	0.858247	Rv0303	909	1	0.112583	0.0165563	0.0562914	0.0430464	0.0298013	0.0794702	0.0298013	0.0231788	0.013245	0.112583	0.0231788	0.0231788	0.0629139	0.0198675	0.0927152	0.0662252	0.0695364	0.0927152	0.00993377	0.0231788	0.150715	0.344334	0.176018	0.328933	0.673267	0.520352	0.1115	0.5093	0.084	0.4545	0.268
Rv0304c	1.22766	7.08017	1.06887	4.01336	3.91547	3.232	4.91425	1.68225	6.75972	2.45215	0.159254	0	-0.163117	1.23199	0.838609	PPE5	6615	0	0.0689655	0	0.0317604	0.00317604	0.0725953	0.220508	0.00771325	0.084392	0	0.0725953	0.00499093	0.144283	0.0326679	0.00862069	0.00453721	0.0889292	0.0889292	0.0431034	0.00272232	0.01951	0.211036	0.334845	0.178987	0.275132	0.609977	0.513832	0.1055	0.6714	0.0709	0.2843	0.359
Rv0305c	2.95849	8.1624	0.860989	5.29822	5.34806	4.68353	5.90591	1.22238	6.7824	2.70076	0.0532105	0	-0.211882	1.07287	0.789845	PPE6	2892	0	0.103842	0.00415369	0.0280374	0.0134995	0.0539979	0.17134	0.0301142	0.0384216	0.00311526	0.0706127	0.0145379	0.11215	0.0384216	0.0259605	0.0488058	0.0820353	0.0674974	0.0539979	0.0103842	0.0290758	0.200207	0.321577	0.176694	0.301521	0.623098	0.498271	0.1481	0.5535	0.1172	0.3486	0.266
Rv0306	0.901901	7.75524	1.08402	4.35636	4.29651	3.56877	5.08167	1.5129	6.76458	3.20088	0.323357	0	-0.106413	1.19044	0.895313	Rv0306	672	1	0.139013	0.0179372	0.058296	0.0807175	0.0358744	0.058296	0.0269058	0.0358744	0.00896861	0.134529	0.0269058	0.00896861	0.0627803	0.0179372	0.103139	0.0493274	0.0224215	0.0717489	0.0224215	0.0179372	0.165179	0.322917	0.174107	0.337798	0.660714	0.497024	0.0851	0.4574	0.1943	0.4551	0.244
Rv0307c	3.67017	9.29356	0.8758	6.4699	6.41717	5.85679	6.93087	1.07408	6.78665	3.30482	0.443131	0	-0.0815663	0.957366	0.92016	Rv0307c	483	0	0.13125	0.00625	0.05625	0.04375	0.0375	0.0875	0.0125	0.0375	0.025	0.11875	0.0125	0.00625	0.05625	0.03125	0.075	0.05625	0.05	0.1125	0.0125	0.03125	0.153209	0.312629	0.198758	0.335404	0.648033	0.511387	0.1643	0.4643	0.0985	0.4365	0.246
Rv0308	4.21718	10.5732	0.82806	7.96675	7.93681	7.49736	8.43755	0.940196	6.79025	3.63425	-0.107449	0	-0.0972845	0.925344	0.904442	Rv0308	717	1	0.151261	0.0168067	0.0252101	0.0168067	0.0336134	0.0504202	0.0462185	0.0420168	0.0168067	0.147059	0.0210084	0.0168067	0.0672269	0.0168067	0.0588235	0.0672269	0.0504202	0.113445	0.0294118	0.012605	0.146444	0.292887	0.238494	0.322176	0.615063	0.531381	0.1729	0.3224	0.1368	0.5222	0.222
Rv0309	6.26154	11.6582	0.86471	9.04797	9.07818	8.54322	9.62869	1.08547	6.79108	3.23618	-0.28504	0	-0.0881201	0.952831	0.913606	Rv0309	657	1	0.119266	0.0275229	0.0366972	0.00917431	0.0321101	0.110092	0.0183486	0.0366972	0.0412844	0.0550459	0.0275229	0.0412844	0.0733945	0.0458716	0.0183486	0.0779817	0.0779817	0.105505	0.0229358	0.0229358	0.181126	0.313546	0.190259	0.315068	0.628615	0.503805	0.1828	0.5054	0.0774	0.4125	0.31
Rv0310c	0	10.1701	1.60959	5.63277	5.28946	4.61914	6.34516	1.72601	6.75464	3.16669	0.554637	0.0033557	0.577362	1.03223	1.57909	Rv0310c	492	0	0.0981595	0.0122699	0.0981595	0.0368098	0.0368098	0.0858896	0.0306748	0.0552147	0.0184049	0.0797546	0.0184049	0.0306748	0.0306748	0.0245399	0.0736196	0.0245399	0.110429	0.0613497	0.0184049	0.0552147	0.207317	0.337398	0.168699	0.286585	0.623984	0.506098	0.1103	0.6069	0.1217	0.3774	0.345
Rv0311	2.36641	9.14378	0.966947	5.52931	5.34362	4.88489	6.00776	1.12287	6.78088	4.00897	0.814454	0	-0.0767553	1.0437	0.924971	Rv0311	1230	1	0.122249	0.0146699	0.0733496	0.0586797	0.0317848	0.0660147	0.0366748	0.0562347	0.0244499	0.110024	0.0244499	0.0171149	0.0684597	0.0366748	0.0586797	0.0562347	0.0440098	0.0684597	0.0171149	0.0146699	0.180488	0.323577	0.177236	0.318699	0.642276	0.500813	0.1079	0.4985	0.1238	0.4966	0.318
Rv0312	1.6542	9.41225	1.16908	7.0692	7.23233	6.35654	7.9488	1.59226	6.7812	3.52709	-0.723379	0	0.241177	0.927903	1.2429	Rv0312	1863	1	0.120968	0.00806452	0.0467742	0.0403226	0.0225806	0.0822581	0.016129	0.0403226	0.00967742	0.0903226	0.0193548	0.0209677	0.114516	0.0290323	0.0516129	0.0758065	0.106452	0.083871	0.00967742	0.0112903	0.167472	0.334407	0.175523	0.322598	0.657005	0.50993	0.1555	0.3924	0.1145	0.479	0.243
Rv0313	6.72407	12.8891	0.816873	9.65978	9.63826	9.25353	9.93074	0.677216	6.79217	5.09385	0.553628	0	-0.155189	0.972061	0.846538	Rv0313	387	1	0.109375	0	0.117188	0.078125	0.0546875	0.117188	0	0.0390625	0.0234375	0.0546875	0.0078125	0.015625	0.0546875	0.015625	0.09375	0.0625	0.0390625	0.0703125	0.015625	0.03125	0.173127	0.299742	0.165375	0.361757	0.661499	0.465116	0.1351	0.5315	0.102	0.4516	0.302
Rv0314c	4.70386	10.0254	0.777295	8.11377	8.19449	7.70822	8.69823	0.990009	6.79091	5.36888	-1.16808	0	-0.15077	0.928066	0.850956	Rv0314c	663	0	0.0863636	0.0136364	0.0272727	0.0363636	0.0181818	0.109091	0.0136364	0.0409091	0.00454545	0.0545455	0.0181818	0.0545455	0.0954545	0.0272727	0.0454545	0.131818	0.0636364	0.122727	0.0136364	0.0227273	0.167421	0.361991	0.167421	0.303167	0.665158	0.529412	0.101	0.5909	0.0944	0.345	0.3
Rv0315	6.05071	10.8435	0.987986	8.79391	8.96522	8.0336	9.58799	1.55438	6.78926	2.44936	-0.433776	0	0.0416522	0.946334	1.04338	Rv0315	885	1	0.0952381	0.00680272	0.0646259	0.0408163	0.0510204	0.12585	0.0170068	0.0306122	0.0136054	0.0612245	0.0340136	0.0510204	0.105442	0.0170068	0.0578231	0.0442177	0.0510204	0.0544218	0.0510204	0.0272109	0.157062	0.319774	0.188701	0.334463	0.654237	0.508475	0.1815	0.5121	0.0585	0.4337	0.305
Rv0316	3.68396	10.662	1.1706	7.30015	7.54774	6.49903	8.1189	1.61987	6.78233	3.04359	-0.493151	0	0.246966	0.923632	1.24869	Rv0316	615	1	0.107843	0	0.0686275	0.0637255	0.0147059	0.0833333	0.0147059	0.0343137	0.00980392	0.117647	0.0392157	0.00980392	0.122549	0.0245098	0.102941	0.0294118	0.0735294	0.0539216	0.0294118	0	0.146341	0.35122	0.149593	0.352846	0.704065	0.500813	0.1353	0.4353	0.0833	0.4907	0.282
Rv0317c	4.87078	8.99674	0.667566	7.59513	7.59306	7.22956	8.06067	0.831108	6.79176	4.09041	-0.591856	0	-0.254881	0.922447	0.746845	glpQ2	771	0	0.121094	0.0078125	0.078125	0.0351562	0.0273438	0.0859375	0.0273438	0.0546875	0.015625	0.105469	0.0351562	0.0195312	0.0390625	0.0195312	0.128906	0.0429688	0.0507812	0.078125	0.0195312	0.0078125	0.167315	0.307393	0.182879	0.342412	0.649805	0.490272	0.1556	0.4444	0.125	0.4462	0.232
Rv0318c	1.20638	7.38864	0.805931	4.83335	4.81156	4.37198	5.36932	0.997343	6.78141	3.89158	-0.144118	0	-0.327106	1.13304	0.674621	Rv0318c	795	0	0.147727	0	0.030303	0.0454545	0.0492424	0.109848	0.0151515	0.0492424	0.00378788	0.132576	0.030303	0.0113636	0.0340909	0.00757576	0.0568182	0.0530303	0.0606061	0.147727	0.0113636	0.00378788	0.140881	0.300629	0.201258	0.357233	0.657862	0.501887	0.0921	0.4561	0.1378	0.434	0.225
Rv0319	2.97211	10.1296	0.672298	5.86584	5.8902	5.55699	6.26301	0.706015	6.789	8.05137	-0.119187	0	-0.337125	1.00942	0.664602	pcp	669	1	0.144144	0.018018	0.036036	0.045045	0.018018	0.0900901	0.027027	0.0630631	0.0135135	0.0810811	0.0315315	0.027027	0.0765766	0.036036	0.0540541	0.045045	0.0540541	0.112613	0.0045045	0.0225225	0.173393	0.337818	0.167414	0.321375	0.659193	0.505232	0.0984	0.5233	0.1271	0.4251	0.264
Rv0320	0	9.16283	1.1693	4.88464	4.9274	4.1163	5.72855	1.61226	6.76349	4.01849	-0.525228	0.00447427	0.0424068	1.1269	1.04413	Rv0320	663	1	0.145455	0.00909091	0.0409091	0.0409091	0.0318182	0.113636	0.0227273	0.0590909	0.0136364	0.0727273	0.0136364	0.0272727	0.0636364	0.0272727	0.0727273	0.0545455	0.0590909	0.0909091	0.0136364	0.0272727	0.173454	0.316742	0.188537	0.321267	0.638009	0.505279	0.1777	0.4721	0.1444	0.3653	0.229
Rv0321	3.5801	8.9293	0.753967	6.53831	6.64231	6.21288	7.032	0.819123	6.78874	4.65026	-0.960589	0	-0.198823	0.952789	0.802904	dcd	573	1	0.0315789	0.0105263	0.0631579	0.0421053	0.0473684	0.0947368	0.0263158	0.0473684	0.0210526	0.142105	0.0157895	0.0315789	0.0736842	0.0421053	0.0684211	0.105263	0.0684211	0.0421053	0.00526316	0.0210526	0.167539	0.343805	0.200698	0.287958	0.631763	0.544503	0.1257	0.5329	0.0537	0.4929	0.295
Rv0322	0	8.67185	0.893282	4.41658	4.38318	3.9005	5.02338	1.12288	6.77414	4.94834	-0.0752056	0.00111857	-0.28988	1.18316	0.711847	udgA	1332	1	0.139955	0.0158014	0.0722348	0.0474041	0.0383747	0.0970655	0.0225734	0.0361174	0.0248307	0.112867	0.013544	0.0316027	0.0428894	0.020316	0.0790068	0.0293454	0.0474041	0.10158	0.00902935	0.0180587	0.165165	0.31006	0.185435	0.339339	0.649399	0.495495	0.1399	0.4835	0.1243	0.4424	0.246
Rv0323c	1.9807	8.49878	0.763454	5.30806	5.22217	4.87278	5.69517	0.822396	6.78532	5.46309	0.302449	0	-0.308111	1.07157	0.693615	Rv0323c	672	0	0.130045	0.0179372	0.0717489	0.0538117	0.0358744	0.0852018	0.0403587	0.0269058	0	0.139013	0.00896861	0.0358744	0.0493274	0.0358744	0.0896861	0.044843	0.044843	0.0672646	0.0134529	0.00896861	0.175595	0.345238	0.174107	0.30506	0.650298	0.519345	0.1364	0.5101	0.1813	0.3576	0.245
Rv0324	1.48147	9.57484	1.05547	5.09954	4.96826	4.4557	5.5293	1.0736	6.7749	5.44923	0.902423	0	-0.044019	1.09949	0.957707	Rv0324	681	1	0.176991	0.00884956	0.079646	0.0752212	0.00442478	0.0929204	0.0176991	0.0442478	0.0176991	0.110619	0.0176991	0.0176991	0.0309735	0.0353982	0.10177	0.0176991	0.0353982	0.0884956	0.00442478	0.0221239	0.173275	0.296623	0.151248	0.378855	0.675477	0.447871	0.1302	0.4323	0.1337	0.4972	0.24
Rv0325	0	8.44197	1.11903	5.06092	5.03949	4.53092	5.57988	1.04896	6.76646	6.8559	-0.529762	0.0100671	0.0144287	1.1046	1.01616	Rv0325	225	1	0.108108	0	0.0405405	0.0675676	0.027027	0.108108	0.0540541	0	0.027027	0.108108	0.0135135	0.0135135	0.0675676	0.0540541	0.0810811	0.027027	0.0405405	0.0945946	0.0135135	0.0540541	0.177778	0.275556	0.182222	0.364444	0.64	0.457778	0.1935	0.3226	0.1525	0.5424	0.251
Rv0326	0	8.92421	1.0626	4.66449	4.63039	4.17822	5.08354	0.905321	6.76679	6.18051	-0.084041	0.00559284	-0.0906994	1.1533	0.911027	Rv0326	456	1	0.13245	0.013245	0.0529801	0.0596026	0.0529801	0.0860927	0.0529801	0.0331126	0.0198675	0.0728477	0.0198675	0	0.0397351	0.0331126	0.0927152	0.0397351	0.0529801	0.119205	0.013245	0.013245	0.162281	0.304825	0.199561	0.333333	0.638158	0.504386	0.1923	0.4769	0.1345	0.386	0.259
Rv0327c	0	10.8125	1.33936	3.67373	3.65253	2.64926	4.51094	1.86169	6.72929	4.66269	0.756862	0.00447427	0.0660545	1.27331	1.06778	cyp135A1	1350	0	0.0957684	0.00222717	0.0445434	0.0512249	0.0378619	0.0690423	0.0400891	0.0579065	0.0311804	0.115813	0.0222717	0.0222717	0.0712695	0.0222717	0.0890869	0.0512249	0.077951	0.0623608	0.0178174	0.0178174	0.195556	0.345185	0.180741	0.278519	0.623704	0.525926	0.1354	0.5286	0.1485	0.3716	0.24
Rv0328	2.87218	12.2067	0.963506	6.37353	6.26953	5.87496	6.86218	0.987224	6.78442	6.80367	0.685745	0	-0.00083812	0.964344	1.00089	Rv0328	603	1	0.165	0.015	0.065	0.045	0.02	0.065	0.015	0.06	0.01	0.095	0.015	0.03	0.035	0.05	0.085	0.08	0.045	0.07	0.01	0.025	0.169154	0.328358	0.18408	0.318408	0.646766	0.512438	0.1486	0.4857	0.1173	0.44	0.266
Rv0329c	0	7.50985	1.28243	3.88956	3.64495	3.0391	4.92791	1.88881	6.73722	3.12547	0.185494	0.00894855	0.0354019	1.24703	1.03713	Rv0329c	627	0	0.163462	0.00961538	0.0576923	0.0240385	0.0336538	0.0961538	0.0336538	0.0576923	0.0144231	0.100962	0.00961538	0.0144231	0.0673077	0.0144231	0.0817308	0.0480769	0.0673077	0.0673077	0.0192308	0.0192308	0.15949	0.370016	0.172249	0.298246	0.668262	0.542265	0.1518	0.5393	0.1377	0.3032	0.215
Rv0330c	0	8.08826	1.1184	4.40116	4.37644	3.77007	5.04972	1.27964	6.76061	4.99047	0.0286352	0.0033557	-0.0666204	1.18502	0.935106	Rv0330c	741	0	0.207317	0.00813008	0.0609756	0.0447154	0.0243902	0.0609756	0.0243902	0.0447154	0.0121951	0.105691	0.0121951	0.00406504	0.0609756	0.0325203	0.0731707	0.0406504	0.0528455	0.0934959	0.0121951	0.0243902	0.14305	0.350877	0.175439	0.330634	0.681511	0.526316	0.1422	0.4771	0.1029	0.4352	0.26
Rv0331	1.83288	11.9058	1.1271	5.33565	5.14056	4.78064	5.59045	0.809815	6.77547	12.2153	2.19855	0	0.0591714	1.06793	1.0609	Rv0331	1167	1	0.154639	0.00515464	0.0721649	0.0463918	0.0360825	0.0876289	0.0309278	0.0335052	0.0257732	0.0979381	0.0128866	0.0103093	0.0721649	0.0206186	0.0515464	0.0438144	0.0695876	0.0979381	0.0154639	0.0154639	0.16024	0.339332	0.175664	0.324764	0.664096	0.514996	0.1437	0.5044	0.1093	0.4094	0.276
Rv0332	1.9241	11.4886	0.803817	6.73366	6.71719	6.34288	7.06558	0.722695	6.78847	14.8419	0.555979	0	-0.137487	0.941304	0.86424	Rv0332	786	1	0.0957854	0.00383142	0.0766284	0.0613027	0.0229885	0.10728	0.0344828	0.0268199	0.0191571	0.111111	0.00766284	0.00766284	0.0651341	0.0268199	0.0881226	0.045977	0.0613027	0.0881226	0.0383142	0.0114943	0.167939	0.324427	0.156489	0.351145	0.675573	0.480916	0.1126	0.491	0.1531	0.4158	0.286
Rv0333	2.9828	10.5068	0.748461	7.13535	7.0971	6.73437	7.51658	0.782214	6.79015	7.20499	0.1274	0	-0.177909	0.92637	0.823817	Rv0333	375	1	0.16129	0	0.104839	0.0645161	0.016129	0.0725806	0.0564516	0.0483871	0.00806452	0.0887097	0.016129	0.00806452	0.00806452	0.0241935	0.0403226	0.0564516	0.0967742	0.104839	0.016129	0.00806452	0.194667	0.322667	0.165333	0.317333	0.64	0.488	0.1296	0.5556	0.1354	0.3667	0.296
Rv0334	4.16145	8.51157	0.619217	6.36649	6.27617	5.99239	6.75578	0.763395	6.79102	3.61603	0.411676	0	-0.345663	0.96488	0.656064	rmlA	867	1	0.09375	0	0.0555556	0.0520833	0.03125	0.111111	0.0138889	0.0659722	0.03125	0.114583	0.0243056	0.0347222	0.0451389	0.0381944	0.0555556	0.0486111	0.0486111	0.0694444	0.0138889	0.0520833	0.192618	0.286044	0.193772	0.327566	0.61361	0.479815	0.1364	0.4917	0.0897	0.5147	0.308
Rv0335c	0	7.99847	1.46026	4.31843	4.31181	3.36367	5.39948	2.0358	6.72944	3.22981	-0.273359	0.0100671	0.265237	1.19502	1.26696	PE6	516	0	0.187135	0.0175439	0.0175439	0.0175439	0.0292398	0.0643275	0.0526316	0.0116959	0.0116959	0.0701754	0.0175439	0.0409357	0.105263	0.0584795	0.134503	0.0643275	0.0467836	0.0409357	0.0116959	0	0.162791	0.366279	0.141473	0.329457	0.695736	0.507752	0.1513	0.375	0.15	0.4783	0.206
Rv0336	0	7.40278	1.12573	2.0954	1.9893	1.36016	2.67531	1.31514	6.65229	5.79744	1.13595	0.0167785	-0.340615	1.46635	0.661112	Rv0336	1512	1	0.172962	0.0318091	0.0695825	0.0417495	0.0238569	0.0675944	0.0298211	0.0337972	0.0198807	0.0755467	0.0178926	0.0159046	0.0735586	0.0377734	0.0934394	0.0437376	0.0616302	0.0536779	0.0139165	0.0218688	0.154101	0.32209	0.171958	0.351852	0.673942	0.494048	0.1922	0.4142	0.0667	0.5255	0.256
Rv0337c	5.53836	11.6323	0.72319	8.03866	8.06922	7.65487	8.40992	0.755048	6.79166	5.87916	0.197379	0	-0.203327	0.926517	0.7984	aspC	1290	0	0.0955711	0.011655	0.0745921	0.04662	0.02331	0.0699301	0.030303	0.0652681	0.027972	0.128205	0.013986	0.032634	0.0629371	0.0512821	0.0512821	0.048951	0.048951	0.0652681	0.016317	0.034965	0.189922	0.34186	0.166667	0.30155	0.643411	0.508527	0.0909	0.5565	0.0884	0.51	0.327
Rv0338c	6.23248	10.5113	0.671599	8.63984	8.75898	8.28463	9.07751	0.792879	6.79261	4.20624	-0.844151	0	-0.271078	0.942677	0.730648	Rv0338c	2649	0	0.120181	0.0192744	0.047619	0.0555556	0.0396825	0.0941043	0.0272109	0.0453515	0.0453515	0.0907029	0.0204082	0.0260771	0.0782313	0.0385488	0.0555556	0.0328798	0.053288	0.0714286	0.0181406	0.0204082	0.185353	0.334466	0.1661	0.314081	0.648547	0.500566	0.1171	0.5565	0.1159	0.4308	0.302
Rv0339c	2.91095	7.74245	0.627319	5.75926	5.74039	5.4286	6.06274	0.634141	6.78966	5.66428	-0.203751	0	-0.392441	1.01976	0.609285	Rv0339c	2499	0	0.18149	0.00721154	0.0625	0.046875	0.00961538	0.0661058	0.0360577	0.0288462	0.0120192	0.137019	0.0204327	0.0132212	0.0516827	0.0348558	0.0841346	0.0649038	0.0637019	0.0612981	0.00961538	0.00841346	0.167667	0.352541	0.153661	0.32613	0.678671	0.506202	0.1178	0.4425	0.1585	0.4313	0.245
Rv0340	4.47913	10.5804	0.92716	7.26279	7.07647	6.64276	7.74924	1.10649	6.78776	3.71601	0.762487	0	0.00301875	0.924141	1.00475	Rv0340	540	1	0.150838	0	0.0837989	0.0446927	0.0167598	0.0893855	0.0614525	0.0335196	0	0.0614525	0.0111732	0.0335196	0.106145	0.0167598	0.0391061	0.0726257	0.0670391	0.0893855	0.0111732	0.0111732	0.183333	0.348148	0.161111	0.307407	0.655556	0.509259	0.1818	0.4545	0.1511	0.3759	0.25
Rv0341	0.733357	14.8742	2.37491	8.68877	8.5011	6.7907	10.2986	3.50789	6.75764	2.76508	0.255414	0	1.43101	0.9439	2.43274	iniB	1440	1	0.173278	0	0.0250522	0.0229645	0.0250522	0.242171	0.0292276	0.0354906	0.00417537	0.0751566	0.0146138	0.0208768	0.0668058	0.0417537	0.0146138	0.0563674	0.0438413	0.102296	0	0.00626305	0.122222	0.306944	0.175694	0.395139	0.702083	0.482639	0.221	0.4465	0.0689	0.3713	0.303
Rv0342	4.63969	11.9516	1.49997	7.82171	7.26707	6.81562	8.53253	1.71691	6.77823	3.25342	1.01972	0	0.576078	0.923896	1.5778	iniA	1923	1	0.107813	0.0046875	0.06875	0.0578125	0.0203125	0.0703125	0.0171875	0.046875	0.0265625	0.110937	0.0171875	0.03125	0.0421875	0.046875	0.1	0.0625	0.0515625	0.096875	0.009375	0.0109375	0.190328	0.304732	0.174727	0.330213	0.634945	0.479459	0.1391	0.4601	0.1371	0.4606	0.224
Rv0343	2.22603	10.2096	1.2147	7.10954	6.96739	6.30481	7.68154	1.37672	6.781	3.95274	0.254413	0	0.287763	0.926933	1.28949	iniC	1482	1	0.154158	0.00811359	0.0608519	0.0446247	0.0283976	0.0709939	0.0162272	0.0547667	0.0121704	0.119675	0.0162272	0.0243408	0.0466531	0.0263692	0.115619	0.0527383	0.0649087	0.0709939	0.00608519	0.00608519	0.152497	0.340756	0.17139	0.335358	0.676113	0.512146	0.1335	0.4751	0.085	0.4649	0.272
Rv0344c	0	8.77819	1.23621	5.21011	5.31628	4.35309	6.13897	1.78588	6.76436	3.58126	-0.561548	0.0033557	0.15155	1.08466	1.15328	lpqJ	561	0	0.102151	0.016129	0.0430108	0.0322581	0.0322581	0.107527	0.016129	0.0591398	0.0107527	0.0537634	0.0215054	0.0430108	0.107527	0.016129	0.0537634	0.0591398	0.145161	0.0537634	0.0107527	0.016129	0.188948	0.367201	0.15508	0.28877	0.655971	0.522282	0.1294	0.5412	0.0933	0.3813	0.295
Rv0345	0.829817	8.7185	0.988713	6.58396	6.50208	5.94355	7.42649	1.48294	6.78363	5.61496	-0.714289	0	0.0388109	0.949902	1.04054	Rv0345	411	1	0.161765	0.0147059	0.0661765	0.0147059	0	0.125	0.0220588	0.0294118	0.0220588	0.102941	0.00735294	0.0147059	0.0441176	0.0220588	0.0882353	0.0514706	0.0367647	0.139706	0.0220588	0.0147059	0.126521	0.284672	0.19708	0.391727	0.676399	0.481752	0.2	0.376	0.087	0.4595	0.244
Rv0346c	4.18918	10.4086	0.953517	8.14221	8.29105	7.68451	8.83963	1.15512	6.7885	4.26207	-1.03383	0	0.0247921	0.928725	1.02652	ansP2	1464	0	0.117043	0.00821355	0.0184805	0.0287474	0.0492813	0.102669	0.0287474	0.0841889	0.0225873	0.12731	0.026694	0.0184805	0.0451745	0.0205339	0.0431211	0.0595483	0.0574949	0.0882957	0.0184805	0.0349076	0.163251	0.318306	0.211066	0.307377	0.625683	0.529372	0.1047	0.5116	0.1031	0.4611	0.286
Rv0347	4.36609	9.52598	0.807781	6.26349	6.21174	5.71822	6.6552	0.936975	6.78763	4.84054	0.910764	0	-0.165331	0.973112	0.836395	Rv0347	987	1	0.106707	0.0121951	0.0457317	0.0792683	0.0243902	0.054878	0.0243902	0.0609756	0.0243902	0.106707	0.0121951	0.0121951	0.0792683	0.0365854	0.097561	0.0518293	0.0640244	0.070122	0.0213415	0.0152439	0.194529	0.321175	0.184397	0.299899	0.621074	0.505572	0.1765	0.4228	0.1898	0.4055	0.244
Rv0348	2.14502	9.6768	1.03175	6.14562	6.09498	5.39673	6.89846	1.50173	6.78159	3.03683	0.20749	0	0.0484736	0.983275	1.0502	Rv0348	654	1	0.0921659	0.00460829	0.0829493	0.0737327	0.0276498	0.0737327	0.0184332	0.0460829	0.0322581	0.0875576	0.0230415	0.0230415	0.0322581	0.0184332	0.0967742	0.0645161	0.0829493	0.0737327	0.0184332	0.0276498	0.220183	0.316514	0.169725	0.293578	0.610092	0.486239	0.1381	0.5414	0.1964	0.3291	0.224
Rv0349	3.98487	9.01305	0.767917	6.25249	6.24895	5.78993	6.70337	0.913437	6.78815	3.27861	0.12049	0	-0.206114	0.974031	0.795613	Rv0349	660	1	0.0776256	0.0136986	0.0958904	0.0639269	0.0182648	0.0502283	0.0456621	0.0456621	0.0136986	0.105023	0.0228311	0.0136986	0.0730594	0.0273973	0.100457	0.0776256	0.0547945	0.0639269	0.0182648	0.0182648	0.2	0.331818	0.171212	0.29697	0.628788	0.50303	0.1543	0.484	0.1687	0.4038	0.227
Rv0350	6.45126	16.1317	1.40793	10.0133	9.94672	9.09046	10.7026	1.61217	6.78608	5.38477	0.86381	0	0.422842	0.985092	1.42457	dnaK	1878	1	0.1072	0	0.08	0.0816	0.0192	0.0928	0.0128	0.0592	0.0624	0.072	0.0144	0.032	0.0368	0.0448	0.0528	0.0544	0.0688	0.0912	0.0048	0.0128	0.209798	0.302982	0.155485	0.331736	0.634718	0.458466	0.1515	0.5616	0.0641	0.4749	0.325
Rv0351	4.70117	15.6074	1.52229	9.49102	9.52312	8.45289	10.4085	1.95565	6.78295	4.3473	0.446269	0	0.555992	0.966299	1.55772	grpE	708	1	0.12766	0	0.114894	0.0765957	0.012766	0.110638	0.0255319	0.00851064	0.0382979	0.0765957	0.012766	0.0212766	0.0382979	0.0638298	0.0510638	0.0553191	0.0553191	0.102128	0	0.00851064	0.207627	0.292373	0.137006	0.362994	0.655367	0.429379	0.1466	0.4817	0.1421	0.4574	0.267
Rv0352	6.53863	14.0671	1.05778	9.02668	8.89871	8.3579	9.55856	1.20066	6.78911	6.85062	1.29348	0	0.105528	0.952249	1.10725	dnaJ1	1188	1	0.0936709	0.0202532	0.0582278	0.0607595	0.0455696	0.156962	0.0126582	0.0253165	0.0329114	0.0658228	0.00506329	0.035443	0.0658228	0.0151899	0.0936709	0.0607595	0.0632911	0.0708861	0.00506329	0.0126582	0.166667	0.319865	0.158249	0.355219	0.675084	0.478114	0.1408	0.5517	0.0912	0.3929	0.274
Rv0353	5.63309	12.679	0.922954	8.29404	8.19333	7.69011	8.78311	1.093	6.78969	5.90178	0.99982	0	-0.00978636	0.932741	0.99194	hspR	381	1	0.0952381	0	0.031746	0.0793651	0.00793651	0.0634921	0.0238095	0.031746	0.0396825	0.126984	0.0238095	0.0238095	0.031746	0.0634921	0.119048	0.0714286	0.047619	0.0952381	0.00793651	0.015873	0.181102	0.293963	0.178478	0.346457	0.64042	0.472441	0.1414	0.4646	0.0734	0.5143	0.239
Rv0354c	0	9.49165	2.03706	5.42667	4.88761	4.09156	6.96264	2.87108	6.71942	2.57418	0.228414	0.01566	0.980861	1.0562	1.98259	PPE7	426	0	0.0992908	0.0283688	0.035461	0.0212766	0.0992908	0.141844	0.0141844	0.0567376	0.0212766	0.0283688	0.0070922	0.0425532	0.0567376	0.0283688	0.0212766	0.0992908	0.113475	0.0638298	0.0070922	0.0141844	0.180751	0.352113	0.199531	0.267606	0.619718	0.551643	0.1231	0.6154	0.1402	0.2929	0.276
Rv0355c	2.32674	7.5866	0.786988	5.10472	5.15788	4.55566	5.68371	1.12805	6.78351	3.30756	-0.238985	0	-0.31181	1.0988	0.689916	PPE8	9903	0	0.0757576	0	0.0263636	0.00545455	0.0687879	0.212121	0.00636364	0.07	0.00151515	0.0633333	0.00727273	0.158788	0.0339394	0.0187879	0.00787879	0.0848485	0.0812121	0.0460606	0.010303	0.0212121	0.214985	0.341311	0.168232	0.275472	0.616783	0.509543	0.09	0.6988	0.0722	0.281	0.392
Rv0356c	2.44062	8.13941	1.00436	6.09813	6.10055	5.48747	6.86656	1.37909	6.78153	3.38098	-0.492985	0	0.0168161	0.987545	1.01854	Rv0356c	645	0	0.107477	0.0046729	0.0654206	0.0607477	0.0514019	0.121495	0.0420561	0.0233645	0.00934579	0.0981308	0.0327103	0.0140187	0.0841121	0.0140187	0.0700935	0.046729	0.0514019	0.0747664	0.00934579	0.0186916	0.153488	0.313178	0.175194	0.35814	0.671318	0.488372	0.1277	0.4574	0.1037	0.4969	0.236
Rv0357c	2.88668	9.29649	0.762445	6.35895	6.43599	5.99365	6.80307	0.809416	6.78816	5.63356	-0.841343	0	-0.203011	0.965456	0.798715	purA	1299	0	0.0810185	0.0138889	0.0648148	0.0555556	0.0208333	0.118056	0.0185185	0.0555556	0.0393519	0.101852	0.0115741	0.025463	0.0509259	0.0324074	0.0740741	0.0324074	0.0671296	0.0925926	0.0115741	0.0324074	0.176289	0.321016	0.17244	0.330254	0.65127	0.493457	0.1362	0.5559	0.0694	0.4472	0.32
Rv0358	0.705718	7.67766	0.944234	4.63673	4.65966	4.18421	5.08062	0.896407	6.77351	5.2185	-0.297368	0	-0.212402	1.15664	0.789324	Rv0358	648	1	0.130233	0.00930233	0.0697674	0.0372093	0.00930233	0.111628	0.00930233	0.0325581	0.00465116	0.106977	0.00465116	0.0139535	0.0604651	0.0186047	0.134884	0.0232558	0.0651163	0.116279	0.0186047	0.0232558	0.126543	0.33179	0.158951	0.382716	0.714506	0.490741	0.1117	0.4569	0.0884	0.4713	0.206
Rv0359	0.740649	7.54557	0.994666	5.05434	5.15765	4.51383	5.7142	1.20037	6.77453	4.26293	-0.810963	0	-0.110804	1.10547	0.890923	Rv0359	780	1	0.135135	0.003861	0.023166	0.023166	0.0694981	0.0926641	0.030888	0.027027	0.003861	0.189189	0.023166	0.011583	0.0579151	0.019305	0.0501931	0.042471	0.0540541	0.0849421	0.034749	0.023166	0.105128	0.319231	0.219231	0.35641	0.675641	0.538462	0.0901	0.4249	0.0443	0.5918	0.288
Rv0360c	0	8.51297	1.18733	5.50433	5.55569	4.92764	6.14825	1.22062	6.76932	5.12109	-0.663443	0.0033557	0.140676	1.04665	1.1424	Rv0360c	438	0	0.172414	0.0206897	0.0758621	0.0482759	0.0137931	0.0896552	0.0275862	0.0275862	0.0206897	0.117241	0.0206897	0.0137931	0.0758621	0.0137931	0.0689655	0.0482759	0.0551724	0.0413793	0.0137931	0.0344828	0.155251	0.342466	0.1621	0.340183	0.682648	0.504566	0.155	0.4651	0.0965	0.4545	0.265
Rv0361	5.11308	9.86291	0.732797	8.07794	8.13927	7.69579	8.60076	0.904971	6.79148	3.97793	-0.716963	0	-0.194493	0.92729	0.807234	Rv0361	828	1	0.12	0.00727273	0.0654545	0.0690909	0.0218182	0.0472727	0.0145455	0.0436364	0.0218182	0.0472727	0.0181818	0.0218182	0.0690909	0.0654545	0.0727273	0.0763636	0.101818	0.0836364	0.0145455	0.0181818	0.205314	0.350242	0.147343	0.297101	0.647343	0.497585	0.1256	0.5516	0.1333	0.3991	0.351
Rv0362	0	8.32328	1.21789	5.44673	5.4663	4.58764	6.32466	1.73702	6.769	3.29028	-0.299081	0.00111857	0.164204	1.05368	1.16593	mgtE	1383	1	0.13913	0.00217391	0.0565217	0.0673913	0.0217391	0.0608696	0.0173913	0.05	0.023913	0.15	0.026087	0.0173913	0.05	0.0152174	0.0586957	0.0478261	0.0695652	0.1	0.0152174	0.0108696	0.161967	0.338395	0.176428	0.32321	0.661605	0.514823	0.084	0.5293	0.0964	0.4543	0.273
Rv0363c	5.87525	10.3982	0.643018	8.54343	8.59458	8.25784	8.94114	0.683291	6.7928	5.67697	-0.890102	0	-0.297027	0.940045	0.704699	fba	1035	0	0.127907	0.0116279	0.0552326	0.0639535	0.0377907	0.0988372	0.0290698	0.0523256	0.0697674	0.0755814	0.0203488	0.0377907	0.0436047	0.0348837	0.0203488	0.0552326	0.0436047	0.0843023	0.00290698	0.0348837	0.21256	0.313043	0.162319	0.312077	0.625121	0.475362	0.0971	0.6151	0.0868	0.4656	0.336
Rv0364	2.82569	11.1752	0.954477	8.01871	8.13117	7.63515	8.53499	0.89984	6.78781	11.0793	-1.91828	0	0.0283179	0.926159	1.03004	Rv0364	684	1	0.105727	0.00440529	0.030837	0.0264317	0.0792952	0.092511	0.0132159	0.0704846	0.0264317	0.118943	0.0220264	0.0132159	0.0837004	0.0132159	0.0440529	0.0528634	0.0440529	0.110132	0.0132159	0.0352423	0.141813	0.299708	0.236842	0.321637	0.621345	0.53655	0.1127	0.4461	0.0894	0.546	0.254
Rv0365c	3.36784	8.54785	0.552286	6.09436	6.08055	5.76045	6.36013	0.599678	6.79162	5.13341	0.340672	0	-0.435602	0.987887	0.566125	Rv0365c	1131	0	0.159574	0.00797872	0.0611702	0.037234	0.0265957	0.0797872	0.0265957	0.0212766	0.0132979	0.103723	0.0159574	0.0265957	0.0425532	0.0478723	0.109043	0.0478723	0.0425532	0.0718085	0.0345745	0.0239362	0.164456	0.330681	0.153846	0.351017	0.681698	0.484527	0.0781	0.5062	0.137	0.4577	0.227
Rv0366c	0	9.95432	1.17067	5.43068	5.39668	4.84242	6.13107	1.28866	6.7697	5.54075	-0.508996	0.00223714	0.114984	1.05569	1.11671	Rv0366c	594	0	0.137056	0.00507614	0.0456853	0.0456853	0.0253807	0.0761421	0.0304569	0.0558376	0.0253807	0.0913706	0.0101523	0.0203046	0.0761421	0.0253807	0.0964467	0.0456853	0.0659898	0.0862944	0.0203046	0.0152284	0.158249	0.368687	0.151515	0.321549	0.690236	0.520202	0.0751	0.5896	0.0671	0.4314	0.211
Rv0367c	0.432374	11.5226	1.24525	6.95031	6.97289	6.36718	7.54894	1.18176	6.7775	8.45157	-0.964793	0	0.313758	0.931488	1.31548	Rv0367c	390	0	0.178295	0	0.0697674	0.0620155	0.00775194	0.0620155	0.0310078	0.0310078	0.0155039	0.0775194	0.0155039	0.0310078	0.0310078	0.0387597	0.0930233	0.0620155	0.0697674	0.108527	0.00775194	0.00775194	0.15641	0.346154	0.128205	0.369231	0.715385	0.474359	0.0804	0.5179	0.0463	0.5288	0.287
Rv0368c	0	8.11478	1.02742	3.05201	2.93191	2.54708	3.4327	0.88562	6.74062	8.22286	1.37851	0.00223714	-0.321839	1.34926	0.679887	Rv0368c	1212	0	0.163772	0.00744417	0.0496278	0.0248139	0.0322581	0.0669975	0.0248139	0.0223325	0.00496278	0.126551	0.0223325	0.0148883	0.0818859	0.0272953	0.121588	0.0719603	0.0421836	0.0645161	0.0173697	0.0124069	0.124587	0.353135	0.174092	0.348185	0.70132	0.527228	0.1291	0.4231	0.0848	0.4922	0.238
Rv0369c	0	7.42449	0.787386	4.7357	4.75816	4.30444	5.16477	0.860331	6.78105	5.59468	-0.230093	0.00111857	-0.35736	1.14475	0.644367	Rv0369c	516	0	0.116959	0	0.0467836	0.0701754	0.0292398	0.105263	0.0233918	0.0233918	0.0643275	0.122807	0.0116959	0.0116959	0.0350877	0.0701754	0.0526316	0.0526316	0.0526316	0.0935673	0.00584795	0.0116959	0.19186	0.30814	0.155039	0.344961	0.653101	0.463178	0.1278	0.5263	0.0952	0.4685	0.314
Rv0370c	0	7.2984	0.976749	4.19172	4.19467	3.56805	4.67958	1.11153	6.76783	3.99263	0.240206	0.00111857	-0.233605	1.21035	0.768122	Rv0370c	897	0	0.134228	0.0201342	0.0872483	0.0604027	0.0234899	0.0536913	0.0134228	0.0503356	0.0167785	0.134228	0.0033557	0.0167785	0.0604027	0.0234899	0.0771812	0.0402685	0.0805369	0.0604027	0.0100671	0.033557	0.179487	0.32107	0.179487	0.319955	0.641026	0.500557	0.1472	0.4377	0.1224	0.5	0.28
Rv0371c	0	7.79145	1.18096	2.23408	2.14443	1.58727	2.70283	1.11556	6.64893	7.09355	1.27109	0.0503356	-0.268425	1.44939	0.733301	Rv0371c	594	0	0.116751	0.0152284	0.0761421	0.0304569	0.0203046	0.0964467	0.0253807	0.0304569	0.0152284	0.111675	0.0203046	0.00507614	0.0507614	0.0304569	0.0913706	0.035533	0.071066	0.126904	0.0152284	0.0152284	0.143098	0.328283	0.164983	0.363636	0.691919	0.493266	0.0857	0.4743	0.1006	0.4967	0.245
Rv0372c	0	7.70994	1.14527	2.6919	2.56992	2.06832	3.12475	1.05643	6.70295	6.13572	1.07558	0.0178971	-0.24807	1.39334	0.753656	Rv0372c	756	0	0.159363	0.0159363	0.063745	0.0517928	0.0159363	0.111554	0.0159363	0.0677291	0.0119522	0.103586	0.00796813	0.0159363	0.0677291	0.0278884	0.063745	0.0478088	0.0557769	0.0836653	0	0.0119522	0.148148	0.334656	0.152116	0.365079	0.699735	0.486772	0.0796	0.4956	0.0748	0.5228	0.322
Rv0373c	1.47087	7.29361	0.908355	3.84836	3.72705	3.23282	4.25592	1.0231	6.76926	4.90552	1.08335	0	-0.343687	1.25204	0.658039	Rv0373c	2400	0	0.123905	0.0150188	0.0713392	0.0538173	0.0300375	0.0926158	0.0275344	0.0513141	0.0362954	0.068836	0.0325407	0.0212766	0.0650814	0.0275344	0.0563204	0.0375469	0.0588235	0.0901126	0.00876095	0.0312891	0.178333	0.31625	0.162917	0.3425	0.65875	0.479167	0.1012	0.5253	0.0755	0.5264	0.3
Rv0374c	0	7.19687	1.10424	3.00951	2.86288	2.39173	3.47647	1.08474	6.72424	5.33986	0.765185	0.0178971	-0.250215	1.35446	0.751511	Rv0374c	480	0	0.0691824	0.0566038	0.0503145	0.0503145	0.0188679	0.0943396	0.0314465	0.0440252	0.0125786	0.0754717	0.0440252	0.0251572	0.0503145	0.0628931	0.0628931	0.0440252	0.0943396	0.0943396	0.0125786	0.00628931	0.1875	0.31875	0.160417	0.333333	0.652083	0.479167	0.0846	0.5385	0.1167	0.4867	0.301
Rv0375c	0	7.70377	1.05811	3.31981	3.15234	2.69165	3.71346	1.02181	6.74687	7.00519	1.37921	0.00447427	-0.258394	1.31651	0.743333	Rv0375c	861	0	0.157343	0.0174825	0.0594406	0.0664336	0.0104895	0.0909091	0.020979	0.0454545	0.013986	0.111888	0.013986	0.0314685	0.0559441	0.013986	0.0804196	0.027972	0.0594406	0.101399	0.0034965	0.0174825	0.149826	0.337979	0.152149	0.360046	0.698026	0.490128	0.098	0.5098	0.0675	0.4955	0.259
Rv0376c	0.355647	7.98152	0.970669	4.4096	4.26426	3.76689	4.91178	1.14489	6.77162	4.77191	0.650085	0	-0.213335	1.184	0.788391	Rv0376c	1143	0	0.15	0.0105263	0.0763158	0.05	0.0289474	0.110526	0.0236842	0.05	0.0105263	0.0710526	0.0157895	0	0.0578947	0.0157895	0.0947368	0.05	0.0526316	0.105263	0.00789474	0.0184211	0.142607	0.31846	0.161855	0.377078	0.695538	0.480315	0.1199	0.4561	0.1029	0.4863	0.229
Rv0377	2.30631	8.54588	0.769067	5.4493	5.46341	5.00917	5.93648	0.927318	6.78546	4.20791	-0.278417	0	-0.284295	1.05336	0.717431	Rv0377	966	1	0.152648	0.00934579	0.0342679	0.0498442	0.0342679	0.0903427	0.0218069	0.05919	0.0124611	0.109034	0.0218069	0.00311526	0.05919	0.0373832	0.0778816	0.0872274	0.046729	0.0778816	0.00934579	0.00623053	0.140787	0.339545	0.1853	0.334369	0.673913	0.524845	0.1362	0.5054	0.0797	0.428	0.232
Rv0378	0	9.60179	1.70402	3.14311	2.93398	2.13707	4.21388	2.07681	6.62829	4.64741	0.687262	0.0693512	0.365906	1.33811	1.36763	Rv0378	222	1	0.150685	0	0.0547945	0.0410959	0	0.410959	0	0.0273973	0.0136986	0.0136986	0.0136986	0.0684932	0.0410959	0	0.0273973	0.0958904	0.0136986	0.0136986	0.0136986	0	0.157658	0.297297	0.0855856	0.459459	0.756757	0.382883	0.1176	0.6324	0.127	0.2131	0.281
Rv0379	2.73609	12.1277	1.24097	8.45418	8.61138	7.78618	9.2591	1.47293	6.78413	5.25964	-1.00221	0	0.303528	0.937445	1.30525	secE2	216	1	0.126761	0	0.084507	0.056338	0.0140845	0.028169	0	0.0985915	0.056338	0.0140845	0.0422535	0	0.0422535	0.056338	0.0985915	0.084507	0.0422535	0.112676	0.0140845	0.028169	0.217593	0.287037	0.148148	0.347222	0.634259	0.435185	0.0909	0.5636	0.069	0.5294	0.261
Rv0380c	0.799657	9.28354	1.22279	5.90165	5.90283	5.25282	6.72892	1.4761	6.77259	4.08963	-0.49833	0	0.216819	1.00597	1.21855	Rv0380c	552	0	0.15847	0.010929	0.0655738	0.0327869	0.0273224	0.0928962	0.0491803	0.0601093	0	0.0710383	0.0163934	0.0382514	0.0218579	0.0273224	0.10929	0.0273224	0.0655738	0.0874317	0.0218579	0.0163934	0.157609	0.32971	0.157609	0.355072	0.684783	0.487319	0.0843	0.5422	0.0719	0.4922	0.251
Rv0381c	0.807067	10.2786	1.10131	6.2313	6.27289	5.65565	7.05387	1.39822	6.77888	5.47528	-0.619028	0	0.125496	0.975819	1.12722	Rv0381c	909	0	0.139073	0.0198675	0.0562914	0.0231788	0.00993377	0.109272	0.0231788	0.0231788	0.013245	0.109272	0.0298013	0.0198675	0.0695364	0.0165563	0.0562914	0.0860927	0.0662252	0.0794702	0.0165563	0.0331126	0.139714	0.338834	0.176018	0.345435	0.684268	0.514851	0.1355	0.4615	0.075	0.4635	0.26
Rv0382c	2.6612	12.5148	0.825055	7.96339	8.00052	7.63904	8.35877	0.719737	6.79015	13.5028	-0.213036	0	-0.100243	0.925298	0.901483	pyrE	540	0	0.139665	0	0.0670391	0.0614525	0.00558659	0.106145	0.0335196	0.027933	0.0111732	0.106145	0.0223464	0.00558659	0.0223464	0.0167598	0.0949721	0.0558659	0.0670391	0.128492	0.00558659	0.0223464	0.144444	0.309259	0.174074	0.372222	0.681481	0.483333	0.1509	0.4528	0.0861	0.4521	0.261
Rv0383c	4.5031	14.0602	0.777907	9.33627	9.3715	8.99711	9.70434	0.707234	6.79219	15.4634	0.12201	0	-0.183401	0.961308	0.818325	Rv0383c	855	0	0.0950704	0.0105634	0.0528169	0.056338	0.0211268	0.0774648	0.0176056	0.0352113	0.0176056	0.0809859	0.0246479	0.028169	0.0880282	0.0387324	0.126761	0.0387324	0.056338	0.0915493	0.0246479	0.0176056	0.17076	0.34386	0.148538	0.336842	0.680702	0.492398	0.0924	0.521	0.1272	0.4358	0.267
Rv0384c	2.15385	15.5524	1.51199	7.21354	6.85838	6.28328	7.73571	1.45243	6.77534	8.96281	1.71384	0	0.58709	0.924904	1.58882	clpB	2547	0	0.119104	0	0.0695755	0.0872642	0.0200472	0.0766509	0.0129717	0.0483491	0.0436321	0.114387	0.0176887	0.0188679	0.0424528	0.0436321	0.0849057	0.0424528	0.057783	0.0801887	0.00353774	0.0165094	0.177464	0.332941	0.136631	0.352964	0.685905	0.469572	0.0498	0.5827	0.0504	0.5394	0.305
Rv0385	1.06325	7.9241	0.780419	5.29829	5.34862	4.87596	5.75197	0.876015	6.78436	5.3106	-0.425906	0	-0.292442	1.07286	0.709285	Rv0385	1173	1	0.120513	0.00769231	0.0794872	0.0307692	0.0282051	0.0871795	0.0333333	0.0333333	0.0102564	0.102564	0.0128205	0.0205128	0.0769231	0.0358974	0.1	0.0410256	0.0282051	0.0846154	0.0282051	0.0384615	0.14578	0.348679	0.171355	0.334186	0.682864	0.520034	0.1275	0.5188	0.0918	0.4448	0.265
Rv0386	0.9128	7.92186	0.803043	5.32894	5.32431	4.82613	5.74285	0.916717	6.7838	6.39363	-0.271295	0	-0.265765	1.06881	0.735961	Rv0386	3258	1	0.181567	0.0165899	0.0709677	0.0580645	0.0267281	0.0663594	0.0258065	0.0285714	0.0156682	0.120737	0.0129032	0.0156682	0.0285714	0.0359447	0.0866359	0.0451613	0.0543779	0.0764977	0.0156682	0.0175115	0.155003	0.310313	0.178023	0.356661	0.666974	0.488336	0.1519	0.4321	0.0993	0.5054	0.266
Rv0387c	1.65622	7.82596	0.802453	4.69229	4.65457	4.22555	5.11778	0.892237	6.7811	5.2328	0.44329	0	-0.347505	1.14996	0.654221	Rv0387c	1330	0	NA	NA	NA	NA	NA	NA	NA	NA	NA	NA	NA	NA	NA	NA	NA	NA	NA	NA	NA	NA	0.14812	0.37594	0.145865	0.330075	0.706015	0.521805	NA	NA	NA	NA	NA
Rv0389	2.0155	8.41416	0.713045	5.7853	5.70009	5.33793	6.14898	0.811053	6.78811	5.35679	0.332548	0	-0.304184	1.01723	0.697543	purT	1260	1	0.157518	0.0143198	0.0501193	0.071599	0.0238663	0.0906921	0.0167064	0.0405728	0.0071599	0.0835322	0.0143198	0.0143198	0.0644391	0.0429594	0.0692124	0.0501193	0.0453461	0.126492	0.0119332	0.00477327	0.149206	0.307143	0.17381	0.369841	0.676984	0.480952	0.1508	0.4358	0.112	0.4676	0.235
Rv0390	2.17471	9.88993	0.805355	7.2266	7.30401	6.93536	7.70198	0.766621	6.78881	11.8265	-1.95425	0	-0.119336	0.924691	0.882391	Rv0390	423	1	0.114286	0.0142857	0.0785714	0.0785714	0.0285714	0.1	0.0285714	0.0357143	0	0.0785714	0.0142857	0.0357143	0.05	0.0214286	0.0857143	0.05	0.0428571	0.0857143	0.0357143	0.0214286	0.165485	0.29078	0.179669	0.364066	0.654846	0.470449	0.1667	0.475	0.1048	0.46	0.25
Rv0391	2.96425	8.44274	0.731604	6.83097	6.93823	6.47948	7.32626	0.846781	6.78962	6.33339	-1.31171	0	-0.20478	0.936384	0.796946	metZ	1221	1	0.115764	0.00738916	0.0615764	0.0492611	0.0394089	0.0985222	0.0221675	0.0344828	0.0246305	0.0960591	0.0246305	0.0197044	0.046798	0.0344828	0.0591133	0.0714286	0.0566502	0.100985	0.00985222	0.0270936	0.161343	0.305487	0.185913	0.347256	0.652744	0.4914	0.1322	0.4626	0.0813	0.5196	0.271
Rv0392c	4.05243	8.61653	0.567084	6.31272	6.28228	6.01016	6.65934	0.649175	6.79165	5.11559	-0.00559536	0	-0.402001	0.969085	0.599725	ndhA	1413	0	0.134043	0.00638298	0.0425532	0.0574468	0.0340426	0.0978723	0.0191489	0.0574468	0.0446809	0.087234	0.0340426	0.0212766	0.0382979	0.0404255	0.0617021	0.0382979	0.0638298	0.0914894	0.00851064	0.0212766	0.196037	0.314933	0.157113	0.331918	0.646851	0.472045	0.0757	0.5666	0.1178	0.4479	0.287
Rv0393	0	8.54437	1.74635	2.92615	2.45739	1.60271	4.62157	3.01886	6.61308	2.82421	0.655828	0.0190157	0.381691	1.36466	1.38342	Rv0393	1326	1	0.185941	0.0362812	0.0748299	0.0272109	0.015873	0.0975057	0.031746	0.0294785	0.00907029	0.0702948	0.00907029	0.0204082	0.0861678	0.0430839	0.0929705	0.0340136	0.0521542	0.0657596	0.00907029	0.00907029	0.14178	0.35822	0.146305	0.353695	0.711916	0.504525	0.1533	0.4673	0.0971	0.451	0.266
Rv0394c	3.13106	8.4326	0.648526	6.56677	6.60914	6.28478	6.91178	0.626995	6.7906	6.99482	-1.04349	0	-0.302448	0.950974	0.699278	Rv0394c	720	0	0.146444	0.0041841	0.0460251	0.0794979	0.0125523	0.0627615	0.0376569	0.0585774	0.0251046	0.0962343	0.0167364	0.0083682	0.0711297	0.0334728	0.0669456	0.0711297	0.0794979	0.0753138	0.0041841	0.0041841	0.197222	0.365278	0.143056	0.294444	0.659722	0.508333	0.1194	0.5721	0.1353	0.3472	0.233
Rv0395	0	9.11453	1.40509	2.63305	2.52804	1.86229	3.26863	1.40634	6.64609	7.453	1.32724	0.0536913	0.00454267	1.40055	1.00627	Rv0395	405	1	0.0820896	0.0373134	0.0522388	0.0522388	0.0373134	0.0970149	0.0223881	0.0223881	0.0298507	0.104478	0.0298507	0.0149254	0.0671642	0.00746269	0.0970149	0.0970149	0.0223881	0.0746269	0.0447761	0.00746269	0.145679	0.296296	0.202469	0.355556	0.651852	0.498765	0.1607	0.4554	0.1188	0.4388	0.188
Rv0396	0	8.57924	1.56999	3.23738	2.87271	2.15966	4.52222	2.36255	6.66984	3.43486	0.577036	0.0313199	0.243407	1.32658	1.24513	Rv0396	393	1	0.123077	0.0153846	0.107692	0.115385	0.0384615	0.0692308	0.0153846	0.0153846	0.0153846	0.1	0.0307692	0.0384615	0.0615385	0.00769231	0.0384615	0.0230769	0.0461538	0.0846154	0.0384615	0.0153846	0.188295	0.264631	0.193384	0.35369	0.618321	0.458015	0.1827	0.4423	0.1522	0.4778	0.25
Rv0397	0	8.86625	1.5868	3.65396	3.38478	2.6261	4.86293	2.23683	6.69093	3.37513	0.325991	0.0268456	0.311081	1.27572	1.31281	Rv0397	369	1	0.131148	0.00819672	0.0737705	0.0163934	0.0245902	0.057377	0.0327869	0.0245902	0	0.0491803	0.0245902	0.0245902	0.147541	0.057377	0.114754	0.0163934	0.122951	0.0327869	0.0245902	0.0163934	0.176152	0.455285	0.102981	0.265583	0.720867	0.558266	0.0741	0.6481	0.1158	0.3043	0.301
Rv0397A	5.34985	11.4973	0.89877	8.04735	7.92942	7.50495	8.54881	1.04387	6.78955	3.75404	0.509247	0	-0.0279111	0.926681	0.973815	Rv0397A	249	1	0.146341	0.0487805	0.0487805	0.0243902	0.0121951	0.109756	0.0243902	0.0853659	0.0121951	0.097561	0.0121951	0.0121951	0.109756	0.0365854	0.0365854	0.0487805	0.0365854	0.0487805	0.0365854	0.0121951	0.184739	0.281124	0.200803	0.333333	0.614458	0.481928	0.1806	0.3333	0.2308	0.4483	0.195
Rv0398c	0	9.3881	1.04587	5.46815	5.44375	4.95858	5.95708	0.998499	6.77527	6.77737	-0.590433	0.00111857	-0.00516863	1.05104	0.996558	Rv0398c	642	0	0.169014	0.0234742	0.056338	0.0187793	0.0375587	0.122066	0	0.0187793	0.0187793	0.0610329	0.0187793	0.0234742	0.056338	0.0422535	0.056338	0.0798122	0.0751174	0.084507	0.0187793	0.0187793	0.147975	0.347352	0.157321	0.347352	0.694704	0.504673	0.0904	0.5638	0.0994	0.3892	0.267
Rv0399c	3.49722	7.78696	0.562129	5.58508	5.57348	5.25424	5.9072	0.652964	6.79062	4.12396	0.0434635	0	-0.475228	1.03736	0.526498	lpqK	1230	0	0.124694	0.00977995	0.0513447	0.0391198	0.0293399	0.0757946	0.0171149	0.0342298	0.0342298	0.107579	0.0244499	0.0366748	0.0733496	0.0366748	0.0562347	0.0513447	0.0757946	0.0684597	0.0146699	0.0391198	0.182927	0.350407	0.171545	0.295122	0.645528	0.521951	0.1063	0.546	0.1006	0.4408	0.236
Rv0400c	2.99878	9.08088	0.74394	6.66073	6.6422	6.17435	7.06826	0.893907	6.78939	4.60602	-0.07093	0	-0.20139	0.94533	0.800336	fadE7	1188	0	0.116456	0.0177215	0.0658228	0.0405063	0.0329114	0.108861	0.0253165	0.0405063	0.0253165	0.116456	0.0278481	0.0177215	0.0481013	0.035443	0.0708861	0.0556962	0.0607595	0.0632911	0.0177215	0.0126582	0.164141	0.342593	0.15404	0.339226	0.681818	0.496633	0.0564	0.5697	0.0906	0.471	0.257
Rv0401	0	8.41477	1.14618	5.16898	5.23105	4.6124	5.97265	1.36024	6.7653	7.03021	-1.26839	0.00447427	0.0559931	1.09019	1.05772	Rv0401	372	1	0.195122	0.0162602	0.0162602	0.00813008	0.0243902	0.105691	0.0162602	0.0243902	0.00813008	0.113821	0.0243902	0	0.0406504	0	0.0894309	0.0487805	0.0650407	0.162602	0.0406504	0	0.0994624	0.317204	0.185484	0.397849	0.715054	0.502688	0.1062	0.4336	0.0943	0.4272	0.256
Rv0402c	1.40206	8.32435	1.14462	5.6104	5.71995	4.84596	6.54415	1.69819	6.77364	3.08599	-0.486606	0	0.110023	1.0346	1.11175	mmpL1	2877	0	0.110647	0.00626305	0.059499	0.0271399	0.0365344	0.0647182	0.0229645	0.0678497	0.0177453	0.11691	0.0375783	0.026096	0.0448852	0.0448852	0.0647182	0.0584551	0.0835073	0.0730689	0.0125261	0.0240084	0.200556	0.337852	0.193952	0.26764	0.605492	0.531804	0.1321	0.5382	0.1575	0.3555	0.259
Rv0403c	0	8.03431	1.19278	5.65425	5.68218	4.95399	6.4854	1.53141	6.77103	4.07459	-0.549232	0.0033557	0.162762	1.03002	1.16449	mmpS1	429	0	0.126761	0.0140845	0.0352113	0.0352113	0.0422535	0.056338	0.0492958	0.0704225	0.0211268	0.0492958	0.0140845	0.0422535	0.056338	0.0140845	0.0422535	0.056338	0.0633803	0.169014	0.0140845	0.028169	0.174825	0.314685	0.219114	0.291375	0.606061	0.5338	0.1875	0.5156	0.0833	0.398	0.315
Rv0404	2.41077	9.97566	1.24589	6.33863	6.41748	5.4949	7.3	1.8051	6.77559	3.17276	-0.281654	0	0.278861	0.967033	1.28059	fadD30	1758	1	0.0991453	0.00854701	0.0717949	0.042735	0.0376068	0.0717949	0.025641	0.0512821	0.034188	0.0888889	0.0205128	0.0273504	0.0598291	0.025641	0.0649573	0.0735043	0.0803419	0.0752137	0.0119658	0.0290598	0.236064	0.25711	0.225256	0.28157	0.53868	0.482366	0.2609	0.3083	0.265	0.3795	0.2
Rv0405	2.48644	9.72263	1.01402	6.07842	6.10716	5.44655	6.77668	1.33013	6.7815	3.30937	-0.0995472	0	0.024674	0.989342	1.0264	pks6	4209	1	0.132668	0.0135521	0.0606277	0.0470756	0.0328103	0.101284	0.0235378	0.0513552	0.0171184	0.0898716	0.0185449	0.0278174	0.0477889	0.0271041	0.0656205	0.0805991	0.0435093	0.0898716	0.0135521	0.0156919	0.178427	0.253504	0.232597	0.335472	0.588976	0.486101	0.2848	0.3059	0.1572	0.438	0.208
Rv0406c	2.73167	7.85084	0.798215	5.66124	5.70094	5.07861	6.24498	1.16637	6.78553	3.05904	-0.28098	0	-0.231102	1.02932	0.770625	Rv0406c	819	0	0.136029	0.00735294	0.0441176	0.0441176	0.0183824	0.0955882	0.0625	0.0441176	0.0183824	0.117647	0.0147059	0.0220588	0.0551471	0.0257353	0.0735294	0.0477941	0.0588235	0.0772059	0.0183824	0.0183824	0.166056	0.338217	0.175824	0.319902	0.65812	0.514042	0.1841	0.4895	0.088	0.4069	0.332
Rv0407	3.77945	9.41397	0.575653	6.88857	6.94082	6.59323	7.22088	0.627656	6.79213	5.93814	-0.611195	0	-0.358189	0.933841	0.643538	fgd1	1011	1	0.125	0.00595238	0.0625	0.0744048	0.0416667	0.0922619	0.0238095	0.0416667	0.0386905	0.0892857	0.0238095	0.0208333	0.0565476	0.0297619	0.0654762	0.047619	0.0416667	0.0625	0.0208333	0.0357143	0.1909	0.323442	0.16815	0.317507	0.64095	0.491592	0.1168	0.5657	0.1395	0.4057	0.308
Rv0408	1.86695	9.07848	0.789235	6.35324	6.48986	6.02924	6.83326	0.804023	6.78728	8.054	-1.50643	0	-0.176661	0.965897	0.825065	pta	2073	1	0.143478	0.0144928	0.0681159	0.0478261	0.0144928	0.0652174	0.0231884	0.0550725	0.0202899	0.104348	0.0202899	0.0188406	0.0507246	0.0347826	0.0637681	0.0550725	0.073913	0.104348	0	0.0217391	0.175109	0.319344	0.182827	0.322721	0.642065	0.502171	0.1485	0.4587	0.1042	0.4735	0.288
Rv0409	3.46494	8.21032	0.777482	6.54817	6.73709	6.11419	7.08731	0.973123	6.78827	4.47914	-1.09967	0	-0.174672	0.952155	0.827054	ackA	1158	1	0.119481	0.00519481	0.0623377	0.0467532	0.0285714	0.103896	0.0415584	0.0493506	0.012987	0.119481	0.0207792	0.0233766	0.038961	0.0233766	0.0909091	0.0623377	0.0415584	0.0857143	0.00519481	0.0181818	0.163212	0.299655	0.189983	0.34715	0.646805	0.489637	0.1429	0.4344	0.1046	0.5052	0.226
Rv0410c	3.41529	11.3098	1.04274	7.5152	7.55771	6.85514	8.02978	1.17464	6.78603	4.89252	0.211453	0	0.120428	0.922316	1.12215	pknG	2253	0	0.1	0.00666667	0.0653333	0.0586667	0.0293333	0.0773333	0.0213333	0.0306667	0.0266667	0.109333	0.0133333	0.0226667	0.068	0.032	0.0746667	0.06	0.0786667	0.088	0.0106667	0.0266667	0.180204	0.337772	0.159343	0.322681	0.660453	0.497115	0.0978	0.5078	0.1095	0.4759	0.272
Rv0411c	3.10341	11.6465	1.10027	7.71614	7.54324	7.09341	8.26158	1.16818	6.78546	5.63752	0.256081	0	0.177198	0.923076	1.17892	glnH	987	0	0.103659	0.0152439	0.0731707	0.0426829	0.0213415	0.0609756	0.00914634	0.0640244	0.0213415	0.097561	0.0182927	0.027439	0.0884146	0.0243902	0.0792683	0.0579268	0.0731707	0.0945122	0.00914634	0.0182927	0.170213	0.357649	0.156028	0.316109	0.673759	0.513678	0.0586	0.569	0.0717	0.4836	0.252
Rv0412c	5.56142	11.8184	1.02676	7.99947	7.884	7.26602	8.54326	1.27724	6.78768	3.82884	0.780398	0	0.100928	0.925837	1.10265	Rv0412c	1320	0	0.154897	0	0.047836	0.0432802	0.0182232	0.0683371	0.0182232	0.0523918	0.0182232	0.102506	0.0159453	0.0250569	0.0364465	0.0501139	0.0888383	0.0637813	0.0865604	0.0774487	0.0113895	0.0205011	0.181818	0.345455	0.156818	0.315909	0.661364	0.502273	0.1003	0.5013	0.1294	0.4368	0.243
Rv0413	1.94757	9.00855	0.816565	6.84596	6.88982	6.52742	7.29735	0.769928	6.78785	10.3102	-1.67717	0	-0.119123	0.935688	0.882603	mutT3	654	1	0.119816	0.0184332	0.0599078	0.0737327	0.00921659	0.0921659	0.0230415	0.0138249	0	0.0967742	0.00460829	0.00921659	0.078341	0.0368664	0.0921659	0.0645161	0.0691244	0.0829493	0.0368664	0.0184332	0.143731	0.324159	0.152905	0.379205	0.703364	0.477064	0.1297	0.4486	0.0838	0.4943	0.245
Rv0414c	0	7.99324	1.02487	4.97212	5.11031	4.60358	5.47636	0.872775	6.76824	9.34505	-1.68031	0.00559284	-0.0912312	1.1161	0.910495	thiE	669	0	0.207207	0.018018	0.0900901	0.036036	0.0225225	0.0900901	0.018018	0.045045	0.0135135	0.103604	0.0045045	0.018018	0.0585586	0.036036	0.0990991	0.027027	0.0315315	0.0585586	0.00900901	0.0135135	0.147982	0.358744	0.149477	0.343797	0.702541	0.508221	0.1244	0.5025	0.1278	0.4176	0.296
Rv0415	2.01852	9.46182	0.80683	6.29595	6.27829	5.90314	6.6952	0.792054	6.78721	7.13315	-0.262445	0	-0.16361	0.970439	0.838117	thiO	1023	1	0.114706	0.0147059	0.0617647	0.0529412	0.00882353	0.1	0.0264706	0.0264706	0.00294118	0.126471	0.0117647	0.00882353	0.0617647	0.0323529	0.1	0.0676471	0.0323529	0.111765	0.0294118	0.00882353	0.134897	0.321603	0.174976	0.368524	0.690127	0.496579	0.1216	0.4426	0.1277	0.4505	0.225
Rv0416	0	8.00941	1.09249	4.49115	4.54209	3.89407	5.17756	1.28349	6.76025	5.35867	-0.705115	0.0100671	-0.0816725	1.17417	0.920054	thiS	207	1	0.0882353	0.0147059	0.0588235	0.0735294	0.0294118	0.0735294	0	0.0588235	0.0294118	0.102941	0.0147059	0.0294118	0.0294118	0.0588235	0.0588235	0.0441176	0.0588235	0.161765	0.0147059	0	0.178744	0.251208	0.202899	0.36715	0.618357	0.454106	0.1455	0.3818	0.1053	0.5849	0.246
Rv0417	3.02803	8.87857	0.765292	5.33597	5.322	4.84468	5.75655	0.911873	6.78554	4.71169	0.531516	0	-0.302592	1.06788	0.699134	thiG	759	1	0.190476	0.0119048	0.0595238	0.047619	0.0119048	0.0873016	0.00396825	0.047619	0.0119048	0.119048	0.0277778	0.0277778	0.0515873	0.015873	0.0674603	0.0436508	0.0714286	0.0833333	0.0119048	0.00793651	0.15942	0.320158	0.172596	0.347826	0.667984	0.492754	0.1429	0.4509	0.1132	0.43	0.263
Rv0418	4.39124	9.22115	0.886545	7.42284	7.52166	7.01941	8.02556	1.00614	6.78826	3.72938	-0.86858	0	-0.035998	0.922543	0.965728	lpqL	1503	1	0.128	0.006	0.068	0.036	0.036	0.108	0.012	0.032	0.034	0.072	0.02	0.044	0.058	0.036	0.044	0.068	0.064	0.102	0.006	0.026	0.182967	0.312708	0.170326	0.333999	0.646707	0.483034	0.1359	0.5	0.0921	0.4667	0.321
Rv0419	6.84052	9.80926	0.37847	8.09634	8.09283	7.89525	8.29393	0.398677	6.79462	5.87995	0.459472	0	-0.54921	0.92768	0.452516	lpqM	1497	1	0.12249	0.0220884	0.0702811	0.0401606	0.0281124	0.0843373	0.0180723	0.0401606	0.0200803	0.0823293	0.0281124	0.0361446	0.0662651	0.0240964	0.064257	0.0682731	0.060241	0.0903614	0.0100402	0.0240964	0.174349	0.317969	0.177021	0.330661	0.648631	0.49499	0.1236	0.5011	0.0974	0.4694	0.256
Rv0420c	3.69039	8.97429	0.86067	7.11562	7.31063	6.55149	7.72398	1.17249	6.78811	3.39695	-0.726757	0	-0.0661271	0.926797	0.935599	Rv0420c	411	0	0.125	0.0147059	0.0514706	0.0147059	0.0220588	0.0882353	0.0367647	0.0441176	0.00735294	0.117647	0.0367647	0.0367647	0.0294118	0.0514706	0.0735294	0.0441176	0.0514706	0.0735294	0.0367647	0.0441176	0.180049	0.29927	0.214112	0.306569	0.605839	0.513382	0.1966	0.453	0.1414	0.3978	0.311
Rv0421c	0.931838	8.69375	0.953884	6.43291	6.66461	6.00898	7.01943	1.01045	6.78334	7.52589	-1.60002	0	-0.00608509	0.959969	0.995641	Rv0421c	630	0	0.129187	0.00956938	0.0334928	0.0382775	0.0143541	0.124402	0.0382775	0.0334928	0.00956938	0.0861244	0.0143541	0.00956938	0.0813397	0.0430622	0.0813397	0.0574163	0.0669856	0.100478	0.00956938	0.0191388	0.155556	0.349206	0.155556	0.339683	0.688889	0.504762	0.1081	0.4649	0.1517	0.4152	0.267
Rv0422c	3.6102	9.49033	0.753978	7.29457	7.43832	6.97755	7.74473	0.76718	6.79009	6.10818	-1.13402	0	-0.169727	0.923705	0.832	thiD	798	0	0.135849	0.0188679	0.0754717	0.0264151	0.0188679	0.0981132	0.0301887	0.0301887	0.0188679	0.120755	0.0188679	0.0113208	0.0566038	0.0339623	0.0528302	0.0603774	0.0603774	0.109434	0.0113208	0.0113208	0.151629	0.325815	0.179198	0.343358	0.669173	0.505013	0.1229	0.4534	0.1174	0.4683	0.284
Rv0423c	6.26355	10.5789	0.513506	8.74234	8.75201	8.45029	9.05227	0.601977	6.79397	4.78783	-0.298977	0	-0.431629	0.945135	0.570097	thiC	1644	0	0.127971	0.0146252	0.0621572	0.0822669	0.0310786	0.071298	0.0383912	0.0639854	0.0347349	0.0676417	0.0255941	0.0201097	0.0530165	0.023766	0.0621572	0.0420475	0.0749543	0.0658135	0.0109689	0.0274223	0.195864	0.332725	0.154501	0.31691	0.649635	0.487226	0.0978	0.5822	0.0879	0.4767	0.317
Rv0424c	5.3759	10.5459	0.827421	8.59472	8.7042	8.10969	9.08321	0.973518	6.79097	3.78249	-0.533728	0	-0.114056	0.941477	0.887671	Rv0424c	276	0	0.164835	0.010989	0.010989	0.120879	0	0.0549451	0.043956	0.0769231	0.032967	0.10989	0.032967	0.0549451	0.043956	0.021978	0.0659341	0.010989	0.043956	0.0659341	0.010989	0.021978	0.235507	0.300725	0.166667	0.297101	0.597826	0.467391	0.1831	0.4789	0.1757	0.403	0.276
Rv0425c	3.04652	10.5732	0.728292	7.65412	7.69589	7.26465	8.06663	0.801981	6.79096	9.9272	-0.924579	0	-0.194408	0.9227	0.807319	ctpH	4620	0	0.177388	0.00779727	0.0519818	0.0461339	0.00909682	0.0805718	0.0194932	0.0311891	0.0155945	0.111111	0.0136452	0.0123457	0.0662768	0.0396361	0.0851202	0.0623782	0.0584795	0.0955166	0.0116959	0.00454841	0.155411	0.341558	0.154545	0.348485	0.690043	0.496104	0.1183	0.4464	0.136	0.4333	0.236
Rv0426c	5.32819	11.3705	0.750982	8.74988	8.71957	8.35196	9.23419	0.882233	6.79198	4.49286	-0.198066	0	-0.194326	0.945308	0.8074	Rv0426c	444	0	0.22449	0	0.0136054	0.0204082	0	0.14966	0	0.0340136	0.0748299	0.0748299	0.00680272	0.0136054	0.0544218	0.00680272	0.0544218	0.0680272	0.0952381	0.102041	0.00680272	0	0.189189	0.297297	0.126126	0.387387	0.684685	0.423423	0.1308	0.4077	0.1489	0.3971	0.222
Rv0427c	3.25677	9.43226	0.740799	6.43843	6.49335	6.15545	6.82055	0.665093	6.7889	6.00605	-0.398778	0	-0.218775	0.959575	0.782951	xthA	876	0	0.109966	0.0103093	0.0996564	0.0343643	0.0378007	0.0859107	0.0206186	0.0343643	0.0274914	0.0859107	0.0171821	0.0206186	0.0790378	0.0309278	0.0756014	0.0378007	0.0549828	0.0790378	0.0343643	0.024055	0.170091	0.336758	0.172374	0.320776	0.657534	0.509132	0.1325	0.5582	0.1075	0.3971	0.29
Rv0428c	0	7.82032	1.03661	5.4896	5.63292	5.10372	6.15985	1.05613	6.77382	8.0215	-1.7195	0.0033557	-0.011817	1.04842	0.989909	Rv0428c	909	0	0.139073	0.00331126	0.0695364	0.0364238	0.013245	0.0827815	0.0298013	0.0198675	0.00331126	0.115894	0.013245	0.00662252	0.0629139	0.0231788	0.0927152	0.0529801	0.0794702	0.0993377	0.0364238	0.0198675	0.151815	0.348735	0.162816	0.336634	0.685369	0.511551	0.1007	0.4739	0.1639	0.3908	0.243
Rv0429c	1.5681	9.33756	0.997153	6.57238	6.70855	6.12604	7.20341	1.07737	6.78307	6.05434	-1.28018	0	0.0465315	0.950622	1.04826	def	594	0	0.111675	0.0152284	0.0862944	0.0406091	0.0253807	0.106599	0.0253807	0.0406091	0.0152284	0.0913706	0.0304569	0.0203046	0.0761421	0.0152284	0.0659898	0.0456853	0.071066	0.0812183	0.0152284	0.0203046	0.176768	0.355219	0.166667	0.301347	0.656566	0.521886	0.1264	0.5862	0.14	0.3028	0.257
Rv0430	3.56996	12.6629	1.28018	9.04888	9.1491	8.44456	9.90314	1.45859	6.78495	5.35026	-1.10813	0	0.327323	0.952855	1.32905	Rv0430	309	1	0.166667	0	0.0686275	0.0784314	0.0392157	0.0392157	0.00980392	0.0294118	0.0490196	0.0980392	0.0392157	0.00980392	0.0196078	0.0294118	0.147059	0.0490196	0.0294118	0.0588235	0.0196078	0.0196078	0.177994	0.288026	0.161812	0.372168	0.660194	0.449838	0.1125	0.4375	0.1111	0.5513	0.192
Rv0431	4.21183	10.436	0.848063	8.02238	8.10647	7.60727	8.53421	0.926947	6.78983	5.9283	-1.10311	0	-0.0781604	0.926223	0.923566	Rv0431	495	1	0.128049	0	0.0487805	0.054878	0.0182927	0.0792683	0	0.0182927	0.0121951	0.103659	0.0304878	0.0243902	0.0609756	0.0121951	0.054878	0.0853659	0.109756	0.134146	0.00609756	0.0182927	0.159596	0.329293	0.177778	0.333333	0.662626	0.507071	0.1027	0.4452	0.1277	0.442	0.21
Rv0432	4.25521	9.76471	0.809198	8.40236	8.68448	8.15865	8.91763	0.758981	6.79072	7.22605	-1.90829	0	-0.12671	0.935907	0.875017	sodC	723	1	0.129167	0.0125	0.0458333	0.025	0.0291667	0.1375	0.0458333	0.0333333	0.0291667	0.0708333	0.0125	0.0291667	0.0791667	0.0208333	0.0166667	0.0875	0.116667	0.0625	0.00416667	0.0125	0.170124	0.360996	0.157676	0.311203	0.672199	0.518672	0.1468	0.5229	0.067	0.414	0.304
Rv0433	3.16972	9.5676	0.808457	7.88755	8.02632	7.5359	8.42586	0.889964	6.79001	9.13786	-1.85928	0	-0.116011	0.924468	0.885715	Rv0433	1131	1	0.106383	0.0159574	0.0744681	0.0611702	0.0239362	0.0611702	0.0319149	0.0531915	0.0212766	0.106383	0.0265957	0.0239362	0.0478723	0.0398936	0.0851064	0.0478723	0.0505319	0.0718085	0.0292553	0.0212766	0.180371	0.312997	0.183024	0.323607	0.636605	0.496021	0.1452	0.5	0.0986	0.4848	0.29
Rv0434	2.29534	8.70806	0.874171	7.16171	7.28689	6.6993	7.73632	1.03702	6.78761	7.75073	-1.46232	0	-0.0516665	0.925837	0.95006	Rv0434	654	1	0.133641	0.0276498	0.0921659	0.0599078	0.0322581	0.0691244	0.00921659	0.0230415	0.00460829	0.101382	0.0276498	0	0.0875576	0.0138249	0.110599	0.0276498	0.0368664	0.105991	0.00921659	0.0276498	0.12844	0.298165	0.19419	0.379205	0.67737	0.492355	0.1562	0.3646	0.0952	0.5706	0.261
Rv0435c	2.48837	8.09957	0.798209	6.6595	6.85482	6.39698	7.16595	0.768971	6.78789	6.91302	-1.66478	0	-0.147192	0.945401	0.854534	Rv0435c	2187	0	0.149725	0.00549451	0.0728022	0.043956	0.010989	0.081044	0.00961538	0.0247253	0.0206044	0.14011	0.010989	0.0123626	0.0618132	0.0233516	0.0755495	0.0728022	0.0714286	0.100275	0.00824176	0.00412088	0.144947	0.346136	0.165066	0.34385	0.689986	0.511203	0.1229	0.4578	0.1014	0.4454	0.251
Rv0436c	4.57302	8.95138	0.543077	7.10847	7.20523	6.89079	7.46822	0.577428	6.79268	5.95869	-1.27701	0	-0.383881	0.926958	0.617846	pssA	861	0	0.153846	0.013986	0.0314685	0.0174825	0.027972	0.0699301	0.020979	0.0594406	0.034965	0.118881	0.041958	0.013986	0.0629371	0.0314685	0.0734266	0.0524476	0.0244755	0.0909091	0.0314685	0.027972	0.16144	0.312427	0.183508	0.342625	0.655052	0.495935	0.0664	0.4481	0.1372	0.5263	0.213
Rv0437c	1.24933	9.34417	0.82636	6.64754	6.77451	6.36127	7.13552	0.774247	6.78692	11.9512	-2.09486	0	-0.119731	0.946091	0.881996	psd	696	0	0.164502	0.017316	0.0519481	0.034632	0.025974	0.0909091	0.030303	0.0606061	0.004329	0.0779221	0.012987	0.012987	0.0952381	0.025974	0.103896	0.04329	0.030303	0.0995671	0.004329	0.012987	0.137931	0.363506	0.150862	0.347701	0.711207	0.514368	0.0845	0.5117	0.1088	0.4469	0.242
Rv0438c	1.74894	8.06102	0.635752	6.22781	6.27293	5.97467	6.61983	0.645153	6.78998	12.464	-1.90485	0	-0.340363	0.976116	0.661363	moeA2	1218	0	0.138272	0.00246914	0.0567901	0.0345679	0.017284	0.0987654	0.0222222	0.0444444	0.00987654	0.0839506	0.0296296	0.0148148	0.0814815	0.0469136	0.0617284	0.054321	0.0641975	0.116049	0.00493827	0.017284	0.161741	0.340722	0.16092	0.336617	0.67734	0.501642	0.1127	0.4789	0.1209	0.4393	0.28
Rv0439c	2.67946	8.16107	0.724825	6.2286	6.30101	5.86404	6.68786	0.823827	6.78858	5.51234	-0.983273	0	-0.251224	0.976048	0.750503	Rv0439c	936	0	0.118971	0.00321543	0.0514469	0.0321543	0.0289389	0.0932476	0.0385852	0.0257235	0.0289389	0.0996785	0.0160772	0.0385852	0.0482315	0.0514469	0.0771704	0.0482315	0.073955	0.0900322	0.0128617	0.022508	0.191239	0.363248	0.155983	0.28953	0.652778	0.519231	0.1124	0.6067	0.1347	0.3249	0.305
Rv0440	6.43978	16.5971	1.77954	11.0912	11.2989	10.0727	12.2052	2.1325	6.78249	3.26409	-0.243746	0	0.748972	1.03057	1.7507	groEL2	1623	1	0.131481	0	0.0592593	0.101852	0.0148148	0.103704	0.0037037	0.0537037	0.0796296	0.101852	0.012963	0.0296296	0.0296296	0.0259259	0.0407407	0.0333333	0.062963	0.1	0.00185185	0.012963	0.198398	0.301294	0.147874	0.352434	0.653728	0.449168	0.1214	0.5905	0.0428	0.4863	0.346
Rv0441c	3.25378	10.2079	1.14786	7.41362	7.53332	6.77575	8.28739	1.51164	6.78315	3.46955	-0.612833	0	0.225267	0.922592	1.22699	Rv0441c	429	0	0.119718	0.0211268	0.112676	0.0211268	0.0140845	0.084507	0.0352113	0.028169	0.028169	0.0985915	0.00704225	0.00704225	0.0985915	0.0140845	0.0774648	0.0492958	0.0422535	0.112676	0.00704225	0.0211268	0.160839	0.365967	0.158508	0.314685	0.680653	0.524476	0.1061	0.5379	0.1532	0.3645	0.262
Rv0442c	3.89891	9.5761	0.63138	5.96794	5.96409	5.54437	6.28451	0.740147	6.79021	5.76554	0.734336	0	-0.368266	0.999646	0.633461	PPE10	1464	0	0.158111	0	0.0184805	0.026694	0.0308008	0.176591	0.00821355	0.0451745	0.00410678	0.0821355	0.0246407	0.0924025	0.0492813	0.0328542	0.0143737	0.11499	0.0554415	0.0349076	0.0164271	0.0143737	0.187842	0.334016	0.150956	0.327186	0.661202	0.484973	0.1076	0.5767	0.1057	0.3497	0.306
Rv0443	6.08216	11.6529	0.669606	8.2501	8.1944	7.77744	8.73547	0.958028	6.79243	3.94259	0.365462	0	-0.261903	0.931509	0.739824	Rv0443	516	1	0.128655	0.0116959	0.0935673	0.0467836	0.0116959	0.0584795	0.0467836	0.0350877	0.0116959	0.105263	0.0116959	0.0116959	0.0409357	0.0350877	0.0760234	0.0526316	0.0643275	0.0935673	0.0292398	0.0350877	0.189922	0.321705	0.166667	0.321705	0.643411	0.488372	0.1284	0.5203	0.1406	0.4098	0.25
Rv0444c	4.16978	9.91811	0.850212	7.70594	7.93444	7.44183	8.25592	0.814088	6.78922	5.39863	-1.47087	0	-0.0727954	0.923007	0.928931	rskA	699	0	0.172414	0	0.0431034	0.0474138	0.0258621	0.0775862	0.00862069	0.0172414	0.00862069	0.0905172	0.0215517	0.0215517	0.0862069	0.0172414	0.0732759	0.0560345	0.125	0.0905172	0.00862069	0.00862069	0.164521	0.346209	0.150215	0.339056	0.685265	0.496423	0.1106	0.3798	0.155	0.4694	0.216
Rv0445c	4.81841	10.3694	0.782756	7.73797	7.82766	7.33494	8.2685	0.933559	6.79043	4.39161	-0.724721	0	-0.140474	0.92323	0.861252	sigK	564	0	0.122995	0.0213904	0.0748663	0.0641711	0.0160428	0.0534759	0.0160428	0.0213904	0.0213904	0.106952	0.0213904	0.026738	0.0160428	0.0320856	0.122995	0.0695187	0.0588235	0.0802139	0.0106952	0.0427807	0.180851	0.312057	0.173759	0.333333	0.64539	0.485816	0.1321	0.5094	0.1111	0.45	0.253
Rv0446c	3.77557	9.59138	0.815928	6.63592	6.76314	6.19538	7.21572	1.02034	6.7879	3.85674	-0.567851	0	-0.130841	0.946769	0.870885	Rv0446c	771	0	0.109375	0.00390625	0.0390625	0.015625	0.0390625	0.101562	0.015625	0.0234375	0.0195312	0.128906	0.015625	0.015625	0.0585938	0.0234375	0.0859375	0.0429688	0.0585938	0.121094	0.0507812	0.03125	0.137484	0.300908	0.210117	0.351492	0.652399	0.511025	0.12	0.4356	0.1281	0.4518	0.229
Rv0447c	3.07368	10.0298	0.883904	5.88642	5.94083	5.40436	6.40213	0.997766	6.78439	5.28517	0.260257	0	-0.123534	1.00744	0.878193	ufaA1	1284	0	0.12178	0.00702576	0.0562061	0.0468384	0.030445	0.0702576	0.0351288	0.0515222	0.00936768	0.100703	0.0210773	0.00702576	0.0562061	0.0421546	0.103044	0.058548	0.0632319	0.0608899	0.0257611	0.0327869	0.170561	0.331776	0.170561	0.327103	0.658879	0.502336	0.0959	0.4603	0.1493	0.492	0.228
Rv0448c	0	9.23024	1.67015	3.97486	3.61218	2.71786	5.36864	2.65078	6.70562	2.62096	0.467496	0.00671141	0.433485	1.23666	1.43521	Rv0448c	666	0	0.0995475	0.0135747	0.0633484	0.0135747	0.0542986	0.040724	0.0497738	0.0452489	0.00452489	0.0995475	0.0180995	0.0180995	0.0904977	0.040724	0.122172	0.040724	0.040724	0.081448	0.0226244	0.040724	0.168168	0.354354	0.187688	0.28979	0.644144	0.542042	0.115	0.475	0.1625	0.46	0.268
Rv0449c	3.10781	11.2772	0.980602	5.74238	5.75977	5.18686	6.12509	0.938225	6.78178	8.59254	1.32348	0	-0.0407996	1.0214	0.960927	Rv0449c	1320	0	0.125285	0.0113895	0.0615034	0.0432802	0.0318907	0.0911162	0.0432802	0.0205011	0.0022779	0.109339	0.0182232	0.0159453	0.047836	0.0296128	0.0911162	0.0660592	0.0523918	0.0865604	0.0113895	0.0410023	0.152273	0.344697	0.175	0.32803	0.672727	0.519697	0.1041	0.5127	0.1217	0.436	0.246
Rv0450c	4.66833	11.0828	0.893783	7.64679	7.73745	7.05636	8.07989	1.02352	6.78889	3.85674	0.238832	0	-0.0288794	0.922662	0.972847	mmpL4	2904	0	0.11272	0.00723888	0.0548087	0.0382627	0.0423992	0.0765253	0.0227508	0.073423	0.033092	0.10031	0.0444674	0.0186143	0.0455016	0.033092	0.0558428	0.0661841	0.0599793	0.0785936	0.0134436	0.0227508	0.204545	0.299242	0.2073	0.288912	0.588154	0.506543	0.164	0.4883	0.1642	0.3835	0.237
Rv0451c	4.58381	11.3267	1.13534	7.64181	7.6752	6.90883	8.23935	1.33052	6.78461	2.79215	0.0741131	0	0.212706	0.922637	1.21443	mmpS4	423	0	0.0571429	0.0142857	0.05	0.0428571	0.0428571	0.0785714	0.0214286	0.0714286	0.0285714	0.0571429	0.0214286	0.0714286	0.0571429	0.0142857	0.0571429	0.0785714	0.0642857	0.121429	0.0142857	0.0357143	0.236407	0.283688	0.20331	0.276596	0.560284	0.486998	0.1371	0.5081	0.2039	0.3763	0.244
Rv0452	1.97237	10.3548	1.03573	5.86531	5.88536	5.16501	6.56438	1.39938	6.77995	4.23798	0.175525	0	0.0262544	1.00947	1.02798	Rv0452	711	1	0.182203	0.0169492	0.0338983	0.0805085	0.0211864	0.0550847	0.0211864	0.029661	0.0127119	0.152542	0.00847458	0.0211864	0.0550847	0.0254237	0.0762712	0.0508475	0.0550847	0.0635593	0.0169492	0.0211864	0.150492	0.329114	0.180028	0.340366	0.66948	0.509142	0.1527	0.3941	0.1206	0.5	0.257
Rv0453	1.62427	8.06591	0.925135	4.32773	4.30994	3.75453	4.78124	1.02671	6.7736	5.20474	0.894796	0	-0.268761	1.1939	0.732966	PPE11	1557	1	0.196911	0.00579151	0.0482625	0.034749	0.0289575	0.0888031	0.011583	0.030888	0.00965251	0.0888031	0.0212355	0.0289575	0.0926641	0.0328185	0.0366795	0.0675676	0.0694981	0.0656371	0.0250965	0.015444	0.154143	0.336545	0.168272	0.34104	0.677585	0.504817	0.141	0.4295	0.1114	0.4631	0.228
Rv0455c	5.3733	12.406	0.82051	9.2845	9.27708	8.90434	9.65577	0.751426	6.79176	5.74756	-0.0933745	0	-0.139195	0.959705	0.862531	Rv0455c	447	0	0.141892	0.0135135	0.0540541	0.0337838	0.0675676	0.0472973	0.027027	0.0472973	0.027027	0.0540541	0.0337838	0.0675676	0.0472973	0.0337838	0.0540541	0.0675676	0.0540541	0.0540541	0.027027	0.0472973	0.228188	0.304251	0.201342	0.266219	0.57047	0.505593	0.168	0.488	0.2041	0.4066	0.324
Rv0456A	0	9.70046	1.36616	5.42065	5.42667	4.53619	6.5548	2.0186	6.75935	3.95436	-0.538199	0.00671141	0.309205	1.05695	1.31093	mazF1	282	0	0.129032	0.0107527	0.0430108	0.0430108	0.0107527	0.0967742	0	0.0537634	0.0107527	0.0430108	0.0215054	0.0430108	0.107527	0.0107527	0.129032	0.0645161	0.0322581	0.11828	0.0322581	0	0.173759	0.315603	0.166667	0.343972	0.659574	0.48227	0.2073	0.4512	0.1667	0.2877	0.283
Rv0456B	0	8.44876	1.18347	2.80899	2.80371	2.1377	3.51184	1.37414	6.69381	4.46959	0.277142	0.0279642	-0.195536	1.37901	0.80619	mazE1	174	0	0.105263	0.0175439	0.0175439	0.0526316	0.0175439	0.0701754	0.0175439	0.0175439	0.0175439	0.0701754	0.0350877	0.0175439	0.0175439	0	0.210526	0.0526316	0.0701754	0.0877193	0.0350877	0.0701754	0.218391	0.241379	0.229885	0.310345	0.551724	0.471264	0.32	0.28	0.3111	0.2326	0.176
Rv0456c	2.97416	8.91532	0.943991	6.41461	6.30811	5.71767	7.20549	1.48781	6.78476	2.54805	-0.03775	0	-0.0173005	0.961292	0.984426	echA2	915	0	0.118421	0.00657895	0.0592105	0.0559211	0.0296053	0.0953947	0.0131579	0.0592105	0.0230263	0.0855263	0.0361842	0.0197368	0.0690789	0.0493421	0.0625	0.0361842	0.0723684	0.0592105	0.0230263	0.0263158	0.183607	0.337705	0.155191	0.323497	0.661202	0.492896	0.0972	0.583	0.0921	0.4344	0.291
Rv0457c	3.06346	7.05867	0.698371	5.44634	5.46471	5.01396	5.91703	0.903066	6.78734	3.14553	-0.217459	0	-0.355359	1.05373	0.646367	Rv0457c	2022	0	0.109955	0.00297177	0.0861813	0.0609212	0.0401189	0.0936107	0.013373	0.0371471	0.0193165	0.089153	0.0193165	0.0267459	0.0534918	0.0178306	0.0787519	0.0505201	0.077266	0.0549777	0.0297177	0.038633	0.190406	0.327399	0.166667	0.315529	0.642928	0.494065	0.108	0.554	0.148	0.3916	0.306
Rv0458	4.06878	10.0999	0.941725	6.23803	6.08476	5.54422	6.81716	1.27294	6.78457	3.41958	0.662497	0	-0.0335231	0.975248	0.968203	Rv0458	1524	1	0.138067	0.00986193	0.0591716	0.0512821	0.0453649	0.0966469	0.0236686	0.0591716	0.0335306	0.0808679	0.0236686	0.0374753	0.0512821	0.0394477	0.0414201	0.0453649	0.0493097	0.0631164	0.0138067	0.0374753	0.178478	0.33399	0.160105	0.327428	0.661417	0.494094	0.0635	0.6024	0.0526	0.5286	0.354
Rv0459	1.15369	10.4456	1.27759	6.02389	6.15324	4.98493	7.03212	2.04719	6.77222	3.04209	-0.210278	0	0.28321	0.994384	1.28494	Rv0459	492	1	0.116564	0.0306748	0.0797546	0.0490798	0.0306748	0.128834	0.0184049	0.0368098	0.0122699	0.0858896	0.0245399	0.00613497	0.0736196	0.0306748	0.0797546	0.0429448	0.0245399	0.0981595	0.0122699	0.0184049	0.142276	0.300813	0.172764	0.384146	0.684959	0.473577	0.1197	0.4789	0.0945	0.4959	0.275
Rv0460	4.62629	10.7494	0.889373	8.22263	8.1859	7.72924	8.8303	1.10106	6.78968	4.39155	-0.566537	0	-0.0413909	0.930764	0.960336	Rv0460	240	1	0.139241	0.0126582	0.0126582	0	0.0379747	0.126582	0.0126582	0.113924	0	0.139241	0.0379747	0.0126582	0.0379747	0.0126582	0.0506329	0.0632911	0.0126582	0.151899	0.0253165	0	0.116667	0.245833	0.25	0.3875	0.633333	0.495833	0.1644	0.3151	0.0896	0.569	0.302
Rv0461	4.08772	9.45511	0.838836	7.54833	7.55293	7.07998	8.03234	0.95236	6.78936	4.16331	-0.502787	0	-0.0835022	0.922338	0.918224	Rv0461	525	1	0.109195	0.0172414	0.0287356	0.0287356	0.0344828	0.103448	0.0229885	0.0229885	0.0287356	0.109195	0.0172414	0	0.0747126	0.0229885	0.0287356	0.0747126	0.0517241	0.132184	0.0344828	0.0574713	0.135238	0.312381	0.209524	0.342857	0.655238	0.521905	0.0987	0.4868	0.087	0.4851	0.218
Rv0462	6.26812	10.3108	0.782024	8.92824	9.08451	8.55773	9.44924	0.891518	6.79175	3.5734	-0.916411	0	-0.167625	0.949649	0.834101	lpdC	1395	1	0.116379	0.00862069	0.0517241	0.0625	0.0366379	0.107759	0.0323276	0.0538793	0.0517241	0.0926724	0.0150862	0.0366379	0.0301724	0.0280172	0.0323276	0.0387931	0.0689655	0.103448	0.00431034	0.0280172	0.207885	0.301075	0.174194	0.316846	0.617921	0.475269	0.1256	0.5615	0.1093	0.434	0.323
Rv0463	2.68578	9.24262	1.10413	7.08871	6.99177	6.49346	7.82562	1.33216	6.78326	3.1334	-0.239197	0	0.176707	0.92742	1.17843	Rv0463	294	1	0.123711	0.0103093	0.0309278	0	0.0206186	0.103093	0	0.0721649	0.0103093	0.14433	0.0206186	0	0.0412371	0.0206186	0.0618557	0.0824742	0.0721649	0.134021	0.0309278	0.0206186	0.115646	0.282313	0.234694	0.367347	0.64966	0.517007	0.1685	0.4045	0.0238	0.5065	0.274
Rv0464c	5.30194	10.1004	0.775672	8.19982	8.31129	7.82339	8.6931	0.869711	6.79111	3.88918	-0.713259	0	-0.15449	0.930162	0.847237	Rv0464c	573	0	0.121053	0.0105263	0.0526316	0.0315789	0.0315789	0.0684211	0.0315789	0.0526316	0.0210526	0.131579	0.0157895	0.0210526	0.0578947	0.0631579	0.0947368	0.0157895	0.0842105	0.0473684	0.0210526	0.0263158	0.198953	0.343805	0.17103	0.286213	0.630017	0.514834	0.1242	0.4845	0.1867	0.4071	0.285
Rv0465c	2.67393	10.5861	1.04751	7.04542	6.96644	6.43121	7.59201	1.1608	6.78454	4.24266	0.132966	0	0.118985	0.92853	1.12071	Rv0465c	1425	0	0.105485	0.0126582	0.0590717	0.0590717	0.0421941	0.0632911	0.035865	0.0337553	0.0168776	0.101266	0.0232068	0.0295359	0.0400844	0.0400844	0.0949367	0.0611814	0.0675105	0.07173	0.00421941	0.0379747	0.181754	0.350175	0.165614	0.302456	0.652632	0.515789	0.086	0.5848	0.0975	0.449	0.273
Rv0466	4.97479	10.1835	0.871756	8.17654	8.28027	7.6457	8.83996	1.19426	6.78983	3.74642	-0.753213	0	-0.0578099	0.929566	0.943917	Rv0466	795	1	0.0643939	0.0151515	0.0909091	0.0719697	0.0340909	0.0719697	0.0416667	0.0606061	0.0265152	0.094697	0.030303	0.0189394	0.0530303	0.0113636	0.102273	0.0454545	0.0454545	0.0795455	0.0265152	0.0151515	0.173585	0.301887	0.189937	0.334591	0.636478	0.491824	0.1538	0.5113	0.0674	0.5085	0.297
Rv0467	5.00158	13.816	1.74584	9.01368	8.84162	7.50949	10.4774	2.96788	6.77704	2.09171	0.254408	0	0.793943	0.951898	1.79567	icl1	1287	1	0.135514	0.00700935	0.0560748	0.0747664	0.0350467	0.0724299	0.0233645	0.0420561	0.0397196	0.0747664	0.0163551	0.0350467	0.0350467	0.0607477	0.0490654	0.0490654	0.0700935	0.067757	0.021028	0.0350467	0.188811	0.340326	0.150738	0.320124	0.660451	0.491064	0.0831	0.6499	0.0364	0.4904	0.38
Rv0468	5.68997	11.8817	1.09339	8.22381	8.11862	7.42331	8.9532	1.52989	6.78698	3.08061	0.461445	0	0.162599	0.930795	1.16433	fadB2	861	1	0.111888	0.0034965	0.0559441	0.0769231	0.0384615	0.0734266	0.0104895	0.034965	0.041958	0.111888	0.0244755	0.0174825	0.048951	0.0244755	0.0664336	0.0594406	0.0559441	0.129371	0	0.013986	0.167247	0.300813	0.192799	0.339141	0.639954	0.493612	0.1339	0.4895	0.0833	0.4826	0.253
Rv0469	6.2639	13.4504	1.04886	9.2668	9.40748	8.694	9.86433	1.17033	6.78924	4.08298	-0.0408967	0	0.0896936	0.959165	1.09142	umaA	861	1	0.0769231	0.0104895	0.0629371	0.0874126	0.0734266	0.0594406	0.020979	0.0594406	0.0559441	0.0909091	0.0384615	0.0314685	0.0244755	0.0559441	0.048951	0.0454545	0.0559441	0.0454545	0.0104895	0.0454545	0.248548	0.24158	0.222997	0.286876	0.528455	0.464576	0.2326	0.4372	0.1683	0.5081	0.317
Rv0470A	0	9.49033	0.978996	5.07236	5.0938	4.61891	5.62447	1.00557	6.77569	5.04026	-0.383559	0.00111857	-0.124099	1.10309	0.877628	Rv0470A	441	0	0.0616438	0.0753425	0.0273973	0.0205479	0.0205479	0.136986	0.0136986	0.0342466	0.0205479	0.0958904	0.0479452	0.00684932	0.0958904	0	0.10274	0.0410959	0.0479452	0.0753425	0.0547945	0.0205479	0.115646	0.30839	0.210884	0.365079	0.673469	0.519274	0.1667	0.4762	0.0833	0.4078	0.258
Rv0470c	7.0056	11.1445	0.605492	9.35356	9.434	9.01658	9.74031	0.723728	6.79358	4.12562	-0.517305	0	-0.356359	0.961852	0.645367	pcaA	864	0	0.0696864	0.010453	0.0662021	0.0627178	0.0627178	0.0662021	0.0452962	0.0418118	0.0487805	0.10453	0.0313589	0.0174216	0.0348432	0.0557491	0.0557491	0.0313589	0.0801394	0.0627178	0.0139373	0.0383275	0.215278	0.321759	0.180556	0.282407	0.604167	0.502315	0.0708	0.6327	0.1024	0.487	0.343
Rv0471c	2.7105	8.77834	0.781033	6.61623	6.76705	6.26431	7.14179	0.877479	6.78829	5.72909	-1.20106	0	-0.166904	0.947937	0.834822	Rv0471c	489	0	0.148148	0.0308642	0.0493827	0.0246914	0	0.0740741	0.0185185	0.0123457	0	0.0864198	0.0185185	0.0308642	0.0864198	0.00617284	0.111111	0.0555556	0.111111	0.0555556	0.0493827	0.0308642	0.147239	0.368098	0.161554	0.323108	0.691207	0.529652	0.1575	0.4863	0.104	0.3577	0.24
Rv0472c	6.45663	10.9317	0.572682	8.25861	8.26732	7.88121	8.62142	0.740208	6.7933	3.89542	0.05191	0	-0.359062	0.931744	0.642665	Rv0472c	705	0	0.0940171	0.0042735	0.0512821	0.0726496	0.025641	0.0598291	0.0213675	0.0683761	0.034188	0.0683761	0.0598291	0.017094	0.042735	0.0299145	0.0897436	0.0683761	0.0598291	0.0854701	0.0213675	0.025641	0.2	0.293617	0.174468	0.331915	0.625532	0.468085	0.1196	0.5217	0.0989	0.4819	0.284
Rv0473	5.14606	8.28286	0.501426	6.81974	6.7674	6.49022	7.17707	0.686851	6.79301	3.00605	0.117887	0	-0.435495	0.936921	0.566231	Rv0473	1371	1	0.149123	0.00219298	0.0701754	0.0657895	0.0372807	0.0548246	0.0241228	0.0592105	0.0263158	0.0964912	0.0175439	0.0131579	0.0416667	0.0350877	0.10307	0.0416667	0.0504386	0.0833333	0.0219298	0.00657895	0.165573	0.288111	0.184537	0.36178	0.649891	0.472648	0.1575	0.3937	0.0921	0.5702	0.269
Rv0474	5.45554	12.4108	1.13787	8.41294	8.32592	7.65708	9.01837	1.36129	6.7867	3.61738	0.545375	0	0.201644	0.936222	1.20337	Rv0474	423	1	0.107143	0.00714286	0.0642857	0.0857143	0.0142857	0.0285714	0.0142857	0.0642857	0.0428571	0.0714286	0.0142857	0.0142857	0.0428571	0.0571429	0.0785714	0.128571	0.0714286	0.0714286	0	0.0214286	0.205674	0.312057	0.170213	0.312057	0.624113	0.48227	0.1696	0.5	0.0588	0.5091	0.265
Rv0475	5.91894	13.994	1.0236	9.7138	9.68756	8.94239	10.3035	1.36106	6.79024	4.65653	0.64416	0	0.0496246	0.973972	1.05135	hbhA	600	1	0.211055	0	0.0301508	0.130653	0.0100503	0.0351759	0	0.0201005	0.100503	0.105528	0.00502513	0.0251256	0.0351759	0.040201	0.080402	0.040201	0.0653266	0.0502513	0	0.0150754	0.206667	0.3	0.131667	0.361667	0.661667	0.431667	0.1875	0.4722	0.0385	0.5393	0.301
Rv0476	6.15383	11.7819	0.780751	9.23138	9.16566	8.72741	9.67421	0.946799	6.79213	3.94417	0.167242	0	-0.177345	0.958096	0.824381	Rv0476	264	1	0.172414	0.0114943	0.0344828	0.0114943	0.0114943	0.0574713	0.0114943	0.0344828	0.045977	0.172414	0.0344828	0	0.045977	0.0229885	0.0344828	0.045977	0.0344828	0.16092	0.0114943	0.045977	0.121212	0.280303	0.25	0.348485	0.628788	0.530303	0.1579	0.3816	0.0274	0.5714	0.206
Rv0477	4.74063	11.5865	0.834067	8.38192	8.381	8.02536	8.8018	0.776447	6.79072	5.24745	0.0318484	0	-0.101235	0.935302	0.900491	Rv0477	447	1	0.162162	0.0135135	0.0472973	0.0675676	0.0135135	0.0810811	0.0135135	0.0135135	0.0135135	0.0743243	0.027027	0.0202703	0.0945946	0.0405405	0.0540541	0.101351	0.0202703	0.0810811	0.0405405	0.0202703	0.158837	0.342282	0.174497	0.324385	0.666667	0.516779	0.1833	0.525	0.1429	0.3077	0.241
Rv0478	0.683218	10.5992	1.01355	6.96552	7.17471	6.49936	7.55967	1.06031	6.7836	10.3056	-1.65074	0	0.0825839	0.930963	1.08431	deoC	675	1	0.21875	0.0178571	0.0535714	0.0446429	0.00892857	0.102679	0.0223214	0.03125	0.0267857	0.0892857	0.0223214	0.00892857	0.03125	0.0178571	0.0491071	0.0625	0.0580357	0.129464	0	0.00446429	0.133333	0.315556	0.17037	0.380741	0.696296	0.485926	0.145	0.455	0.067	0.4652	0.246
Rv0479c	4.54275	10.9028	0.783716	8.52535	8.64567	8.08829	9.02637	0.938076	6.7913	6.22998	-1.09253	0	-0.155811	0.939527	0.845916	Rv0479c	1047	0	0.109195	0.00574713	0.0287356	0.045977	0.0287356	0.0747126	0.0287356	0.0603448	0.0373563	0.0833333	0.00574713	0.045977	0.0804598	0.0603448	0.0517241	0.0747126	0.0862069	0.0747126	0.0114943	0.00574713	0.212034	0.344795	0.160458	0.282713	0.627507	0.505253	0.1365	0.4881	0.1502	0.4265	0.28
Rv0480c	0.978203	10.119	0.92164	6.46308	6.5496	6.13041	6.97652	0.846107	6.78416	9.83938	-1.65768	0	-0.0361995	0.957839	0.965527	Rv0480c	843	0	0.157143	0.0107143	0.0571429	0.0321429	0.0214286	0.110714	0.0107143	0.0428571	0.0142857	0.075	0.0142857	0.0214286	0.0607143	0.0464286	0.0714286	0.0428571	0.0678571	0.110714	0.0107143	0.0214286	0.166074	0.335706	0.15777	0.340451	0.676157	0.493476	0.1174	0.502	0.1416	0.3937	0.267
Rv0481c	4.1085	8.54402	0.706972	6.55285	6.63845	6.09119	7.07091	0.979728	6.78976	3.21314	-0.445316	0	-0.244883	0.951855	0.756843	Rv0481c	525	0	0.0632184	0	0.0517241	0.0747126	0.0229885	0.091954	0.0172414	0.0689655	0.0172414	0.0862069	0.0229885	0.0229885	0.045977	0.0402299	0.0689655	0.0747126	0.0862069	0.103448	0.0229885	0.0172414	0.198095	0.300952	0.179048	0.321905	0.622857	0.48	0.1119	0.5175	0.1259	0.4427	0.263
Rv0482	0.999631	7.71317	0.970401	5.58626	5.71486	4.96215	6.28955	1.3274	6.77945	4.1227	-0.830812	0	-0.0668253	1.03723	0.934901	murB	1110	1	0.140921	0.0135501	0.0623306	0.0460705	0.0243902	0.105691	0.0189702	0.0325203	0.0243902	0.102981	0.00813008	0.0216802	0.0542005	0.0135501	0.0785908	0.0460705	0.0677507	0.113821	0.00813008	0.0162602	0.154054	0.303604	0.182883	0.359459	0.663063	0.486486	0.1717	0.4247	0.0951	0.4642	0.28
Rv0483	5.5972	11.6671	0.938829	9.6214	9.71274	9.1034	10.3443	1.24091	6.7908	3.88018	-0.748857	0	-0.0318936	0.970723	0.969833	lprQ	1356	1	0.119734	0.00665188	0.0576497	0.0332594	0.0266075	0.0886918	0.0177384	0.0509978	0.0266075	0.0465632	0.0133038	0.037694	0.0842572	0.0332594	0.0487805	0.0709534	0.0776053	0.101996	0.0221729	0.0354767	0.176254	0.334808	0.168142	0.320796	0.655605	0.50295	0.1371	0.533	0.065	0.4502	0.315
Rv0484c	1.7199	8.73715	0.829577	6.77257	6.78695	6.39813	7.27591	0.87778	6.78753	8.94008	-1.35825	0	-0.109698	0.939275	0.892029	Rv0484c	756	0	0.167331	0	0.0677291	0.0358566	0.0199203	0.0916335	0.0239044	0.0517928	0.0199203	0.0836653	0.0119522	0.0199203	0.0278884	0.0318725	0.0876494	0.0358566	0.0836653	0.115538	0.0119522	0.0119522	0.166667	0.345238	0.152116	0.335979	0.681217	0.497354	0.1076	0.5561	0.1005	0.3878	0.29
Rv0485	5.44512	11.16	0.82238	8.93173	8.91358	8.40476	9.5214	1.11664	6.79139	3.69591	-0.410257	0	-0.127359	0.949739	0.874368	Rv0485	1317	1	0.143836	0.00228311	0.043379	0.043379	0.0159817	0.0981735	0.0228311	0.0342466	0.00684932	0.111872	0.0182648	0.0159817	0.0547945	0.0273973	0.10274	0.0753425	0.0639269	0.0936073	0.00684932	0.0182648	0.137434	0.336371	0.175399	0.350797	0.687168	0.511769	0.1548	0.4391	0.0824	0.4515	0.249
Rv0486	3.42537	9.90004	0.8536	8.01014	8.06161	7.61473	8.53017	0.915443	6.78963	8.20323	-1.41138	0	-0.0724124	0.926012	0.929314	mshA	1443	1	0.147917	0.00625	0.0666667	0.0395833	0.01875	0.104167	0.03125	0.0333333	0.0104167	0.0895833	0.00833333	0.0166667	0.06875	0.0270833	0.0958333	0.05	0.0416667	0.114583	0.0125	0.0166667	0.137907	0.324324	0.160083	0.377685	0.70201	0.484407	0.1155	0.4249	0.0987	0.5198	0.255
Rv0487	4.64484	10.2969	0.684442	7.50505	7.4858	7.08309	7.957	0.873912	6.7915	4.75383	-0.16173	0	-0.237878	0.92232	0.763849	Rv0487	552	1	0.0655738	0.00546448	0.0546448	0.0765027	0.0273224	0.0655738	0.0163934	0.0327869	0.0273224	0.125683	0.0163934	0.0382514	0.0437158	0.0655738	0.0983607	0.0710383	0.0327869	0.0983607	0.010929	0.0273224	0.177536	0.280797	0.193841	0.347826	0.628623	0.474638	0.1284	0.4324	0.0811	0.5915	0.265
Rv0488	0	7.98666	1.05591	4.75455	4.74387	4.11672	5.4149	1.29818	6.76974	3.7479	-0.103382	0.00111857	-0.086577	1.14248	0.91515	Rv0488	606	1	0.174129	0.00995025	0.0199005	0.0199005	0.0547264	0.0945274	0.0149254	0.0646766	0.00497512	0.119403	0.0248756	0.0298507	0.0497512	0.0199005	0.0447761	0.039801	0.039801	0.134328	0.0248756	0.0149254	0.146865	0.272277	0.245875	0.334983	0.607261	0.518152	0.2088	0.3516	0.1543	0.4295	0.223
Rv0489	4.03965	9.74256	0.764312	7.39499	7.3678	6.99284	7.97124	0.978395	6.79021	5.02908	-0.586448	0	-0.158393	0.922705	0.843333	gpm1	750	1	0.11245	0.00401606	0.0843373	0.0481928	0.0200803	0.0963855	0.0240964	0.0401606	0.0200803	0.124498	0.0160643	0.0240964	0.0522088	0.0281124	0.0843373	0.0481928	0.0522088	0.0682731	0.0200803	0.0321285	0.169333	0.321333	0.168	0.341333	0.662667	0.489333	0.125	0.5278	0.0674	0.4699	0.312
Rv0490	4.7223	11.2884	0.638396	8.61528	8.5992	8.26175	8.92435	0.662593	6.79291	10.2246	-0.357656	0	-0.303636	0.942032	0.698091	senX3	1233	1	0.126829	0.00243902	0.0658537	0.0756098	0.0243902	0.0682927	0.0219512	0.0390244	0.0195122	0.107317	0.0195122	0.0268293	0.0268293	0.0317073	0.109756	0.0731707	0.0487805	0.095122	0.00731707	0.0097561	0.175994	0.301703	0.175182	0.347121	0.648824	0.476886	0.1408	0.4425	0.1243	0.4814	0.2
Rv0491	3.23402	10.3751	0.732598	7.82	7.80308	7.39037	8.2707	0.880323	6.79122	6.35559	-0.408024	0	-0.191283	0.923882	0.810443	regX3	684	1	0.0748899	0.00440529	0.101322	0.0704846	0.0176211	0.0837004	0.0132159	0.0396476	0.0396476	0.123348	0.030837	0.0132159	0.0396476	0.00881057	0.0837004	0.0572687	0.0528634	0.118943	0.00440529	0.0220264	0.169591	0.282164	0.187135	0.361111	0.643275	0.469298	0.1458	0.474	0.05	0.5322	0.308
Rv0492A	0	7.19162	0.934391	4.34634	4.33232	3.76936	4.91445	1.14509	6.77051	4.5681	-0.239625	0.0033557	-0.257254	1.19165	0.744472	Rv0492A	330	0	0.12844	0.00917431	0.0458716	0.0275229	0.100917	0.0917431	0.0183486	0.0366972	0.00917431	0.119266	0.0366972	0.0275229	0.0642202	0.00917431	0.110092	0.0366972	0.00917431	0.0733945	0.0275229	0.0183486	0.127273	0.330303	0.209091	0.333333	0.663636	0.539394	0.1031	0.5258	0.1026	0.4459	0.232
Rv0492c	0.0856655	8.69726	1.00061	4.9488	5.01953	4.42417	5.51073	1.08656	6.77251	7.25097	-0.650771	0	-0.118431	1.11904	0.883295	Rv0492c	1890	0	0.162162	0.0143084	0.0476948	0.0429253	0.0222576	0.100159	0.0222576	0.027027	0.00953895	0.112878	0.0174881	0.0143084	0.0667727	0.0254372	0.100159	0.0461049	0.0476948	0.0953895	0.0111288	0.0143084	0.126984	0.351323	0.153968	0.367725	0.719048	0.505291	0.0872	0.4929	0.0817	0.4754	0.238
Rv0493c	0.433363	8.00907	0.872605	5.04203	4.94274	4.54949	5.48208	0.932582	6.78016	5.62022	0.0439715	0	-0.23448	1.10708	0.767247	Rv0493c	990	0	0.130699	0.00911854	0.0486322	0.0547112	0.0212766	0.115502	0.0334347	0.0303951	0.0182371	0.0790274	0.00911854	0.00607903	0.0851064	0.0212766	0.0820669	0.0395137	0.0820669	0.0729483	0.0486322	0.0121581	0.168687	0.336364	0.142424	0.352525	0.688889	0.478788	0.0964	0.4714	0.1866	0.3953	0.226
Rv0494	0	8.07194	1.42614	3.67966	3.55452	2.80085	4.78635	1.9855	6.70909	3.23547	-0.0379242	0.0145414	0.15356	1.27258	1.15529	Rv0494	729	1	0.165289	0.00413223	0.0661157	0.0619835	0.0206612	0.0702479	0.0206612	0.0330579	0.00826446	0.123967	0.0165289	0.0206612	0.0578512	0.0371901	0.0991736	0.0413223	0.0454545	0.0826446	0.00413223	0.0206612	0.146776	0.336077	0.156379	0.360768	0.696845	0.492455	0.1038	0.4764	0.0697	0.5233	0.246
Rv0495c	5.33728	9.72263	0.589908	7.69756	7.68693	7.30996	8.07486	0.764898	6.79276	3.82598	-0.0705827	0	-0.333044	0.922953	0.668682	Rv0495c	891	0	0.10473	0.0304054	0.0709459	0.0506757	0.0236486	0.097973	0.0405405	0.0202703	0.0405405	0.0945946	0.0101351	0.0168919	0.0608108	0.0405405	0.0878378	0.0405405	0.0540541	0.0540541	0.0405405	0.0202703	0.180696	0.327722	0.157127	0.334456	0.662177	0.484848	0.1193	0.5432	0.1396	0.4167	0.277
Rv0496	3.0219	9.832	0.617011	7.78267	7.80551	7.52096	8.10849	0.587532	6.79233	15.9216	-1.88589	0	-0.306562	0.923573	0.695164	Rv0496	987	1	0.140244	0.00609756	0.0579268	0.0762195	0.0152439	0.0823171	0.00914634	0.0457317	0.0304878	0.106707	0.0213415	0.0152439	0.0457317	0.0121951	0.097561	0.097561	0.0579268	0.0640244	0.0152439	0.00304878	0.179331	0.311044	0.155015	0.35461	0.665653	0.466059	0.1079	0.4496	0.1418	0.4569	0.211
Rv0497	4.06544	9.45129	0.593065	7.42581	7.45585	7.1192	7.83564	0.716445	6.79242	5.96797	-0.88558	0	-0.329463	0.922529	0.672263	Rv0497	933	1	0.145161	0	0.0516129	0.083871	0.00967742	0.0806452	0.0322581	0.0387097	0.00645161	0.0774194	0.00967742	0.00967742	0.0870968	0.0387097	0.0903226	0.0645161	0.0483871	0.0967742	0.0193548	0.00967742	0.162915	0.329046	0.146838	0.3612	0.690247	0.475884	0.1264	0.4483	0.1241	0.4646	0.223
Rv0498	1.90626	7.87783	0.742272	6.42051	6.56768	6.11481	6.93683	0.822026	6.78839	8.59062	-1.72537	0	-0.218591	0.960863	0.783136	Rv0498	843	1	0.121429	0.0107143	0.05	0.0535714	0.0357143	0.0857143	0.0357143	0.0178571	0.0142857	0.0964286	0.0321429	0.0142857	0.0571429	0.0357143	0.0928571	0.0821429	0.0392857	0.0892857	0.0107143	0.025	0.149466	0.328588	0.17675	0.345196	0.673784	0.505338	0.1125	0.4917	0.095	0.4769	0.252
Rv0499	1.35993	7.92744	0.825268	6.0251	6.15747	5.63982	6.56059	0.920768	6.78546	6.83041	-1.30996	0	-0.169003	0.994271	0.832723	Rv0499	876	1	0.127148	0.0206186	0.0515464	0.0412371	0.024055	0.103093	0.024055	0.0274914	0.00687285	0.103093	0.024055	0.0171821	0.0893471	0.0343643	0.0721649	0.0378007	0.0618557	0.106529	0.0206186	0.00687285	0.131279	0.315068	0.180365	0.373288	0.688356	0.495434	0.1496	0.4016	0.072	0.5307	0.248
Rv0500	2.89402	8.50997	0.829926	7.04893	7.19384	6.71059	7.6247	0.914108	6.78814	7.44075	-1.75333	0	-0.0985088	0.928435	0.903218	proC	888	1	0.186441	0	0.0440678	0.0610169	0.0305085	0.0949153	0	0.0271186	0.0169492	0.101695	0.0305085	0.020339	0.0372881	0.040678	0.0576271	0.0542373	0.0610169	0.122034	0	0.0135593	0.158784	0.287162	0.179054	0.375	0.662162	0.466216	0.1394	0.3865	0.1181	0.5041	0.272
Rv0500A	5.88203	12.1239	0.961694	9.65225	9.75247	8.95573	10.3144	1.35868	6.79066	3.20212	-0.36469	0	-0.0101037	0.971797	0.991623	Rv0500A	237	1	0.115385	0	0.0384615	0.0512821	0.0384615	0.0769231	0.0384615	0	0.0384615	0.0769231	0.0512821	0.025641	0.025641	0.0384615	0.0769231	0.0641026	0.0897436	0.128205	0	0.025641	0.181435	0.278481	0.189873	0.350211	0.628692	0.468354	0.1562	0.375	0.0984	0.5574	0.19
Rv0501	5.34382	11.1746	0.704129	8.7958	8.88128	8.53026	9.20467	0.674416	6.79236	7.3311	-1.35583	0	-0.24225	0.946378	0.759477	galE2	1131	1	0.111702	0.00531915	0.0478723	0.037234	0.0345745	0.101064	0.0159574	0.0478723	0.0239362	0.0851064	0.0319149	0.0292553	0.0611702	0.0292553	0.109043	0.0691489	0.0425532	0.0744681	0.0132979	0.0292553	0.179487	0.295314	0.186561	0.338638	0.633952	0.481874	0.184	0.4141	0.1338	0.4448	0.247
Rv0502	6.12523	11.1169	0.75796	9.3111	9.38472	8.83765	9.87279	1.03514	6.79232	3.73587	-0.635603	0	-0.202564	0.960525	0.799162	Rv0502	1077	1	0.122905	0.00837989	0.0586592	0.0530726	0.0586592	0.075419	0.027933	0.0418994	0.0195531	0.100559	0.0167598	0.0251397	0.0642458	0.0251397	0.0949721	0.0502793	0.0558659	0.075419	0.00558659	0.0195531	0.165274	0.31662	0.197772	0.320334	0.636955	0.514392	0.1556	0.4476	0.1147	0.4848	0.241
Rv0503c	5.37042	11.0061	0.908457	8.77207	8.85301	8.41601	9.35778	0.941764	6.79015	4.36714	-0.827827	0	-0.037364	0.945821	0.964362	cmaA2	909	0	0.0728477	0.013245	0.0827815	0.0728477	0.0529801	0.0662252	0.0264901	0.0430464	0.0562914	0.0927152	0.0298013	0.0264901	0.0430464	0.0331126	0.0562914	0.0529801	0.0629139	0.0463576	0.0165563	0.0529801	0.224422	0.311331	0.170517	0.293729	0.605061	0.481848	0.0795	0.6109	0.1137	0.5	0.343
Rv0504c	3.1676	10.5063	0.7659	7.5162	7.59919	7.05089	7.97394	0.923043	6.79042	5.53239	-0.220616	0	-0.156417	0.922316	0.84531	Rv0504c	501	0	0.144578	0	0.0662651	0.0722892	0.0542169	0.0421687	0.0542169	0.0722892	0.0421687	0.0662651	0.0120482	0.0180723	0.0542169	0.0180723	0.060241	0.0361446	0.0662651	0.0903614	0	0.0301205	0.211577	0.333333	0.169661	0.285429	0.618762	0.502994	0.1197	0.5563	0.1339	0.4435	0.335
Rv0505c	4.32071	10.3483	0.673982	7.51819	7.49852	7.07045	7.9045	0.83405	6.79163	5.33351	-0.205558	0	-0.248334	0.922316	0.753393	serB1	1122	0	0.160858	0.0107239	0.0589812	0.0375335	0.0268097	0.0938338	0.0241287	0.0509383	0.0187668	0.101877	0.0160858	0.0214477	0.0563003	0.0321716	0.0884718	0.0616622	0.0509383	0.0589812	0.0107239	0.0187668	0.167558	0.356506	0.157754	0.318182	0.674688	0.51426	0.103	0.5515	0.1254	0.3838	0.256
Rv0506	3.95538	12.2574	1.03219	7.82673	7.82997	7.15655	8.53202	1.37547	6.78683	3.60222	-0.239252	0	0.108256	0.923939	1.10998	mmpS2	444	1	0.0816327	0.0136054	0.047619	0.0340136	0.0272109	0.0544218	0.0204082	0.0544218	0.0408163	0.0816327	0.0340136	0.0272109	0.0612245	0.0204082	0.0612245	0.0952381	0.0544218	0.156463	0.0136054	0.0204082	0.18018	0.306306	0.207207	0.306306	0.612613	0.513514	0.1496	0.5197	0.0847	0.4182	0.222
Rv0507	3.7715	10.512	0.839117	6.48618	6.45206	5.93614	7.05263	1.11649	6.78734	3.79958	0.225791	0	-0.117132	0.956249	0.884595	mmpL2	2907	1	0.110537	0.00413223	0.0588843	0.035124	0.0464876	0.0702479	0.0237603	0.0743802	0.0268595	0.106405	0.0485537	0.0206612	0.0475207	0.0237603	0.0630165	0.0619835	0.0588843	0.0805785	0.0123967	0.0258264	0.192294	0.276574	0.226694	0.304438	0.581011	0.503268	0.1973	0.4068	0.1333	0.4706	0.234
Rv0508	0	9.40323	0.914389	6.66864	6.59709	6.12458	7.42497	1.30039	6.7856	5.76263	-0.614512	0.00111857	-0.0304905	0.944879	0.971236	Rv0508	294	1	0.0927835	0.0206186	0.0824742	0.0824742	0.0309278	0.0721649	0.0206186	0.0309278	0.0103093	0.113402	0.0309278	0.0103093	0.0618557	0.0206186	0.103093	0.0721649	0.0412371	0.0824742	0.0103093	0.0103093	0.176871	0.27551	0.187075	0.360544	0.636054	0.462585	0.1829	0.3902	0.1316	0.4932	0.235
Rv0509	5.38723	11.7379	0.70476	9.29674	9.33828	8.95171	9.71895	0.767246	6.79273	7.85593	-1.14191	0	-0.255321	0.960081	0.746406	hemA	1407	1	0.155983	0.00854701	0.0512821	0.0641026	0.0106838	0.0683761	0.0299145	0.025641	0.0149573	0.100427	0.0192308	0.0128205	0.0363248	0.0363248	0.0854701	0.0790598	0.0363248	0.147436	0.00213675	0.0149573	0.15494	0.307036	0.177683	0.360341	0.667377	0.484719	0.1407	0.4519	0.1103	0.4522	0.244
Rv0510	5.63805	12.0269	0.914572	9.2321	9.27899	8.71179	9.85096	1.13917	6.79069	4.10273	-0.478135	0	-0.0435452	0.958117	0.958181	hemC	930	1	0.161812	0.012945	0.0711974	0.0679612	0.012945	0.100324	0.00970874	0.038835	0.00647249	0.12945	0.0161812	0.00970874	0.0420712	0.012945	0.0938511	0.0614887	0.0550162	0.0906149	0.00323625	0.00323625	0.146237	0.298925	0.173118	0.38172	0.680645	0.472043	0.13	0.4116	0.1124	0.4863	0.215
Rv0511	3.70481	11.862	0.895235	8.98846	8.99613	8.51652	9.48509	0.96857	6.79049	8.53041	-0.976693	0	-0.055988	0.951223	0.945739	hemD	1698	1	0.143363	0.0106195	0.0584071	0.0548673	0.0230088	0.0902655	0.0159292	0.040708	0.0230088	0.079646	0.00707965	0.0159292	0.0849558	0.0212389	0.0725664	0.0619469	0.0778761	0.0973451	0.0123894	0.00884956	0.151355	0.346879	0.147821	0.353946	0.700824	0.4947	0.0984	0.502	0.0731	0.4825	0.272
Rv0512	3.41094	11.1397	1.04314	8.44647	8.55557	7.82143	9.19312	1.37169	6.78775	4.50041	-0.718561	0	0.105922	0.937217	1.10765	hemB	990	1	0.164134	0.00607903	0.0911854	0.0455927	0.0182371	0.0881459	0.0151976	0.0395137	0.0121581	0.0820669	0.0364742	0.0151976	0.0455927	0.0273556	0.0790274	0.0547112	0.0364742	0.103343	0.00911854	0.0303951	0.149495	0.307071	0.178788	0.364646	0.671717	0.485859	0.1573	0.472	0.0625	0.4856	0.262
Rv0513	5.22697	10.7032	0.945184	8.35824	8.35794	7.72267	9.07065	1.34799	6.78921	2.84211	-0.271321	0	0.0105815	0.934603	1.01231	Rv0513	549	1	0.120879	0	0.043956	0.0604396	0.0164835	0.104396	0.0164835	0.043956	0.032967	0.115385	0.010989	0.00549451	0.0604396	0.0384615	0.0714286	0.0494505	0.0769231	0.0934066	0.021978	0.0164835	0.165756	0.29326	0.169399	0.371585	0.664845	0.462659	0.125	0.3816	0.1076	0.5467	0.218
Rv0514	0	9.89876	1.16382	7.47192	7.56708	6.80446	8.27198	1.46753	6.78189	7.09	-1.17197	0.00223714	0.24145	0.922367	1.24318	Rv0514	300	1	0.171717	0.020202	0.020202	0.010101	0.010101	0.0909091	0.030303	0.030303	0	0.131313	0.010101	0.020202	0.0707071	0.030303	0.0909091	0.0606061	0.0606061	0.10101	0.020202	0.020202	0.106667	0.34	0.19	0.363333	0.703333	0.53	0.1183	0.4086	0.0588	0.5244	0.221
Rv0515	0	8.00311	1.38852	3.59572	3.54734	2.72336	4.4471	1.72374	6.71355	3.11778	0.110785	0.0100671	0.105697	1.28282	1.10742	Rv0515	1512	1	0.172962	0.0318091	0.0695825	0.0417495	0.0238569	0.0675944	0.0318091	0.0337972	0.0198807	0.0755467	0.0178926	0.0159046	0.0715706	0.0377734	0.0934394	0.0437376	0.0616302	0.0536779	0.0139165	0.0218688	0.154762	0.321429	0.171958	0.351852	0.67328	0.493386	0.1922	0.4142	0.0668	0.5269	0.258
Rv0516c	2.63836	13.2733	1.65681	8.56473	8.76777	7.64721	9.63092	1.98371	6.77519	4.86838	-0.825129	0	0.716165	0.940647	1.71789	Rv0516c	477	0	0.120253	0.0253165	0.056962	0.0506329	0.0189873	0.0696203	0.0443038	0.056962	0.0126582	0.101266	0.0253165	0.0189873	0.0379747	0.0379747	0.0759494	0.0886076	0.056962	0.0822785	0.00632911	0.0126582	0.197065	0.320755	0.178197	0.303983	0.624738	0.498952	0.146	0.5109	0.152	0.3793	0.235
Rv0517	4.53464	8.75449	0.732094	6.4917	6.51837	6.02292	7.05319	1.03027	6.78928	2.60564	-0.142709	0	-0.223781	0.955874	0.777946	Rv0517	1311	1	0.116972	0.00688073	0.0366972	0.0275229	0.043578	0.087156	0.0252294	0.0458716	0.00917431	0.137615	0.0229358	0.00917431	0.0527523	0.0389908	0.0756881	0.0573394	0.0321101	0.105505	0.0412844	0.0275229	0.139588	0.292143	0.215103	0.353166	0.645309	0.507246	0.1307	0.4267	0.0962	0.5139	0.246
Rv0518	2.81049	8.72565	0.868653	6.50568	6.48009	6.01513	7.17102	1.15589	6.78634	4.65422	-0.762246	0	-0.0862815	0.954935	0.915445	Rv0518	696	1	0.121212	0.004329	0.0909091	0.038961	0.025974	0.108225	0.021645	0.038961	0.012987	0.0909091	0.025974	0.021645	0.0822511	0.017316	0.0735931	0.038961	0.047619	0.0952381	0.017316	0.025974	0.162356	0.321839	0.181034	0.33477	0.656609	0.502874	0.1748	0.4757	0.118	0.3964	0.288
Rv0519c	2.05986	8.94955	1.04864	6.78367	6.90602	6.40076	7.46475	1.06398	6.78234	6.61014	-1.5591	0	0.109927	0.93871	1.11165	Rv0519c	903	0	0.116667	0.01	0.05	0.0233333	0.04	0.146667	0.0166667	0.03	0.0133333	0.1	0.04	0.02	0.0733333	0.03	0.0666667	0.08	0.05	0.05	0.0233333	0.02	0.146179	0.335548	0.166113	0.352159	0.687708	0.501661	0.084	0.5267	0.0979	0.4381	0.275
Rv0522	4.33425	8.15222	0.861903	6.35421	6.44205	5.57848	7.13256	1.55408	6.78641	1.83372	-0.118573	0	-0.103919	0.965822	0.897808	gabP	1305	1	0.135945	0.0115207	0.016129	0.0184332	0.0668203	0.101382	0.00691244	0.0529954	0.00921659	0.117512	0.0414747	0.0230415	0.0345622	0.0207373	0.0414747	0.0645161	0.0506912	0.133641	0.0299539	0.0230415	0.127969	0.288889	0.249808	0.333333	0.622222	0.538697	0.1492	0.4476	0.0973	0.4494	0.272
Rv0523c	0	8.27429	0.770938	6.1818	6.23109	5.78263	6.69962	0.916993	6.7871	8.41458	-1.15925	0.00111857	-0.209146	0.980084	0.79258	Rv0523c	396	0	0.122137	0	0.0381679	0.0229008	0.0458015	0.0839695	0.00763359	0.0305344	0.0381679	0.0992366	0.0152672	0.0458015	0.0763359	0.0229008	0.122137	0.0305344	0.0534351	0.0687023	0.0381679	0.0381679	0.166667	0.333333	0.174242	0.325758	0.659091	0.507576	0.1327	0.5133	0.0792	0.4433	0.245
Rv0524	2.75514	11.0158	0.963625	7.93741	8.10635	7.43678	8.5397	1.10292	6.78775	7.49041	-1.35483	0	0.0386587	0.924966	1.04039	hemL	1389	1	0.188312	0.012987	0.047619	0.0367965	0.0454545	0.103896	0.017316	0.0367965	0.00865801	0.0714286	0.021645	0.021645	0.0670996	0.0281385	0.0649351	0.0627706	0.0541126	0.0822511	0.0108225	0.017316	0.145428	0.355652	0.156947	0.341973	0.697624	0.512599	0.0775	0.5472	0.1102	0.4169	0.244
Rv0525	0.644689	10.6732	1.03866	7.28157	7.48789	6.85119	7.92505	1.07387	6.78404	9.74207	-1.82917	0	0.114781	0.923878	1.11651	Rv0525	609	1	0.138614	0.00990099	0.0742574	0.0445545	0.019802	0.0693069	0.039604	0.0346535	0.00990099	0.0841584	0.00990099	0.0148515	0.0693069	0.0346535	0.0940594	0.039604	0.0544554	0.10396	0.029703	0.0247525	0.144499	0.343186	0.164204	0.348112	0.691297	0.507389	0.125	0.4886	0.0764	0.4933	0.298
Rv0526	0	10.7756	1.13655	7.60292	7.75248	7.01577	8.31292	1.29716	6.78319	7.25803	-1.20207	0.00111857	0.214079	0.922474	1.21581	Rv0526	651	1	0.111111	0.0138889	0.0648148	0.037037	0.037037	0.0925926	0.00925926	0.0324074	0.00925926	0.0787037	0.0138889	0.0185185	0.0787037	0.0509259	0.0972222	0.0694444	0.0462963	0.106481	0.00925926	0.0231481	0.152074	0.319508	0.170507	0.357911	0.677419	0.490015	0.1105	0.4579	0.0971	0.5119	0.251
Rv0527	0.432374	10.1976	1.26337	7.13286	7.25807	6.38141	7.99471	1.61331	6.77819	5.75689	-1.01061	0	0.33695	0.926422	1.33868	ccdA	780	1	0.138996	0.015444	0.015444	0.011583	0.0501931	0.123552	0.003861	0.046332	0.003861	0.138996	0.011583	0.00772201	0.0501931	0.027027	0.046332	0.03861	0.0694981	0.166023	0.023166	0.011583	0.0935897	0.289744	0.214103	0.402564	0.692308	0.503846	0.0879	0.3724	0.0448	0.6161	0.258
Rv0528	1.48543	10.2822	1.27225	7.02036	7.16226	6.36196	7.84767	1.48571	6.77775	4.76007	-0.893508	0	0.343017	0.929237	1.34474	Rv0528	1590	1	0.122873	0.00567108	0.0548204	0.0302457	0.0453686	0.0926276	0.0226843	0.0378072	0.0132325	0.117202	0.0094518	0.0302457	0.0623819	0.0415879	0.0812854	0.0529301	0.0623819	0.0793951	0.0170132	0.020794	0.140881	0.362264	0.159119	0.337736	0.7	0.521384	0.0553	0.5511	0.0476	0.525	0.285
Rv0529	1.98169	9.14778	0.910085	7.2319	7.34886	6.65117	7.89176	1.24059	6.7873	5.37282	-1.00392	0	-0.0145212	0.924607	0.987205	ccsA	975	1	0.135802	0.00617284	0.0246914	0.0246914	0.0555556	0.101852	0.0154321	0.037037	0.00617284	0.126543	0.0154321	0.0246914	0.0432099	0.0154321	0.0709877	0.0462963	0.0462963	0.132716	0.037037	0.0339506	0.111795	0.327179	0.207179	0.353846	0.681026	0.534359	0.0853	0.5017	0.0664	0.4877	0.267
Rv0530	1.83314	10.4976	0.746053	8.07218	8.09923	7.81621	8.40913	0.592923	6.79077	25.0815	-3.02328	0	-0.181118	0.927171	0.820609	Rv0530	1218	1	0.111111	0.00987654	0.0691358	0.0469136	0.0197531	0.0938272	0.0246914	0.0197531	0.0197531	0.0987654	0.00493827	0.017284	0.091358	0.0148148	0.0938272	0.0666667	0.0716049	0.0938272	0.00493827	0.0271605	0.156814	0.348933	0.147783	0.34647	0.695402	0.496716	0.0976	0.4851	0.0928	0.4785	0.271
Rv0530A	4.76138	13.033	1.08625	8.64885	8.63624	7.90098	9.32062	1.41964	6.78784	4.0152	0.267647	0	0.143342	0.942909	1.14507	Rv0530A	162	0	0.0754717	0	0.0754717	0.0188679	0.0188679	0.0754717	0.0188679	0.0566038	0.0188679	0.188679	0.0377358	0.0566038	0.0566038	0.0188679	0.132075	0.0188679	0.0377358	0.0377358	0.0188679	0.0377358	0.166667	0.314815	0.203704	0.314815	0.62963	0.518519	0.1458	0.4375	0.075	0.5405	0.183
Rv0531	4.17436	9.52422	0.748622	7.61547	7.74555	7.12504	8.16013	1.03508	6.79074	3.46325	-0.664958	0	-0.173899	0.922521	0.827828	Rv0531	318	1	0.152381	0	0.0190476	0.0761905	0.0380952	0.0666667	0	0.0571429	0.00952381	0.133333	0.0190476	0.00952381	0.047619	0.00952381	0.133333	0.0380952	0.0571429	0.114286	0.00952381	0.00952381	0.132075	0.292453	0.188679	0.386792	0.679245	0.481132	0.1183	0.3441	0.1053	0.5618	0.188
Rv0532	0	8.89649	1.04136	4.86913	4.96307	4.1743	5.43579	1.26148	6.77111	5.98003	-0.00564934	0.00111857	-0.0873976	1.12875	0.914329	PE_PGRS6	1785	1	0.198653	0.0016835	0.0505051	0.00841751	0.023569	0.383838	0.010101	0.016835	0.0016835	0.0622896	0.003367	0.026936	0.0252525	0.026936	0.026936	0.0387205	0.0286195	0.0387205	0.013468	0.013468	0.0868347	0.285714	0.14902	0.478431	0.764146	0.434734	0.21	0.484	0.0314	0.3567	0.298
Rv0533c	3.09941	10.1459	0.713609	7.08997	7.12308	6.6651	7.51263	0.847528	6.79052	6.28311	-0.346682	0	-0.213781	0.92739	0.787946	fabH	1008	0	0.158209	0.0119403	0.0686567	0.038806	0.0358209	0.107463	0.0119403	0.0597015	0.0208955	0.0686567	0.0298507	0.0298507	0.0507463	0.0298507	0.0597015	0.0537313	0.0656716	0.0716418	0.00895522	0.0179104	0.18254	0.328373	0.157738	0.331349	0.659722	0.486111	0.1027	0.5411	0.1255	0.4156	0.244
Rv0534c	0.447338	8.8564	0.949777	5.69953	5.75575	5.11533	6.26073	1.1454	6.78098	5.71962	-0.355115	0	-0.0757886	1.02557	0.925938	menA	879	0	0.191781	0.010274	0.0376712	0.00684932	0.0239726	0.109589	0.00342466	0.0308219	0.010274	0.14726	0.0171233	0.0171233	0.0445205	0.0205479	0.0616438	0.0410959	0.0547945	0.116438	0.0308219	0.0239726	0.110353	0.296928	0.192264	0.400455	0.697383	0.489192	0.097	0.3657	0.0735	0.5805	0.255
Rv0535	2.9469	7.69856	0.584478	5.23605	5.27638	4.99777	5.51875	0.52098	6.78947	6.12971	0.260867	0	-0.496698	1.08118	0.505028	Rv0535	795	1	0.136364	0.0227273	0.0606061	0.0378788	0.0492424	0.109848	0.0378788	0.030303	0.00757576	0.0719697	0.0189394	0.0265152	0.0643939	0.0227273	0.0643939	0.0340909	0.0606061	0.106061	0.00757576	0.030303	0.152201	0.339623	0.181132	0.327044	0.666667	0.520755	0.1381	0.5565	0.0863	0.3915	0.279
Rv0536	0.768504	8.06812	0.864883	4.93745	4.97424	4.57055	5.43804	0.867492	6.77895	6.55832	-0.718491	0	-0.255573	1.12046	0.746153	galE3	1041	1	0.16185	0.0202312	0.0722543	0.0289017	0.0317919	0.106936	0.0346821	0.0231214	0.0115607	0.0780347	0.0202312	0.0202312	0.0722543	0.0260116	0.0809249	0.0462428	0.0231214	0.109827	0.00578035	0.0260116	0.132565	0.338136	0.164265	0.365034	0.70317	0.502402	0.1019	0.5064	0.0789	0.4845	0.274
Rv0537c	3.97331	11.1022	0.584136	7.6166	7.69525	7.35043	7.92009	0.569659	6.79264	11.4054	-1.14446	0	-0.33839	0.922526	0.663337	Rv0537c	1434	0	0.142558	0.0104822	0.0314465	0.0146751	0.0419287	0.0922432	0.0146751	0.0461216	0.00838574	0.142558	0.0125786	0.0209644	0.0566038	0.0230608	0.067086	0.0838574	0.0607966	0.0859539	0.0209644	0.0230608	0.133194	0.338215	0.198745	0.329847	0.668061	0.53696	0.1	0.4682	0.0888	0.4758	0.244
Rv0538	1.81645	8.78865	0.700822	6.47544	6.45225	6.19694	6.76965	0.57271	6.78935	12.113	-1.3243	0	-0.256162	0.956984	0.745564	Rv0538	1647	1	0.156934	0.00182482	0.0510949	0.0328467	0.0182482	0.0748175	0.0164234	0.020073	0.00547445	0.060219	0.0164234	0.00912409	0.149635	0.0565693	0.0310219	0.0437956	0.135036	0.109489	0.00364964	0.00729927	0.150577	0.369763	0.139041	0.340619	0.710383	0.508804	0.1196	0.3794	0.0896	0.5373	0.284
Rv0539	0	9.94422	1.26958	6.29724	6.15485	5.71541	7.21791	1.5025	6.77257	5.98192	-0.741639	0.00223714	0.299248	0.970335	1.30097	Rv0539	633	1	0.133333	0.0047619	0.0666667	0.0380952	0.0047619	0.0904762	0.0238095	0.0380952	0.0238095	0.104762	0.0190476	0.0142857	0.0619048	0.0047619	0.0952381	0.0571429	0.0428571	0.133333	0.0238095	0.0190476	0.132701	0.336493	0.159558	0.371248	0.707741	0.496051	0.0957	0.5106	0.0575	0.4699	0.236
Rv0540	0.496841	7.65448	0.760277	4.72143	4.76913	4.427	5.1046	0.677593	6.78115	9.37122	-1.01806	0	-0.386181	1.14646	0.615545	Rv0540	663	1	0.190909	0.0227273	0.1	0.0227273	0.0272727	0.0681818	0.00454545	0.0409091	0.0227273	0.122727	0.0136364	0.00909091	0.05	0.0318182	0.0772727	0.0318182	0.0590909	0.0909091	0.00909091	0.00454545	0.137255	0.33635	0.168929	0.357466	0.693816	0.505279	0.1256	0.4673	0.0726	0.5	0.296
Rv0541c	3.00126	8.39142	0.958948	6.4823	6.57617	5.90646	7.22057	1.31411	6.78431	3.18987	-0.572771	0	0.00243358	0.956514	1.00416	Rv0541c	1350	0	0.180401	0.00890869	0.0289532	0.013363	0.0445434	0.0957684	0.0155902	0.0512249	0.00668151	0.13363	0.0111359	0.0155902	0.0489978	0.0155902	0.0690423	0.0467706	0.0467706	0.100223	0.0512249	0.0155902	0.112593	0.313333	0.201481	0.372593	0.685926	0.514815	0.1084	0.4261	0.0824	0.5132	0.252
Rv0542c	3.71118	9.41661	0.965664	7.388	7.58105	6.79557	8.05756	1.26199	6.78679	3.3253	-0.766817	0	0.0429114	0.922753	1.04464	menE	1089	0	0.160221	0.00828729	0.0635359	0.0359116	0.0165746	0.121547	0.019337	0.0331492	0.0138122	0.11326	0.00828729	0.0110497	0.0718232	0.0165746	0.0662983	0.0469613	0.0635359	0.110497	0.00552486	0.0138122	0.147842	0.333333	0.161616	0.357208	0.690542	0.494949	0.1048	0.4611	0.1387	0.4228	0.224
Rv0543c	7.39512	10.7436	0.591123	9.49299	9.59419	9.09267	9.93585	0.84318	6.79373	3.45715	-0.738301	0	-0.375242	0.966365	0.626484	Rv0543c	303	0	0.1	0.01	0.1	0.08	0.04	0.05	0.03	0.05	0.01	0.11	0.02	0.02	0.06	0.02	0.1	0.04	0.04	0.09	0.02	0.01	0.161716	0.313531	0.191419	0.333333	0.646865	0.50495	0.1395	0.5	0.0921	0.493	0.25
Rv0544c	3.18378	9.60219	1.01338	7.99335	8.28401	7.54954	8.70129	1.15175	6.7871	4.58913	-1.32107	0	0.0876382	0.925739	1.08936	Rv0544c	279	0	0.195652	0	0.0326087	0	0.0652174	0.0869565	0.0217391	0.076087	0.0217391	0.152174	0.0108696	0.0108696	0.0326087	0.0108696	0.0543478	0.0326087	0.0543478	0.0869565	0.0326087	0.0217391	0.125448	0.336918	0.207885	0.329749	0.666667	0.544803	0.1163	0.5	0.0667	0.4559	0.327
Rv0545c	6.59035	11.1647	0.740453	9.7642	9.89325	9.40015	10.2816	0.881495	6.79274	4.5349	-1.13114	0	-0.235329	0.975782	0.766397	pitA	1254	0	0.151079	0.00239808	0.0167866	0.0191847	0.0311751	0.117506	0.0167866	0.0551559	0.0167866	0.122302	0.0167866	0.028777	0.057554	0.0191847	0.0431655	0.057554	0.0767386	0.110312	0.0263789	0.0143885	0.140351	0.323764	0.1874	0.348485	0.672249	0.511164	0.0902	0.4642	0.0876	0.4834	0.279
Rv0546c	4.37821	9.43632	0.708174	7.36235	7.48377	7.01861	7.86657	0.847962	6.79091	4.30246	-0.964845	0	-0.214782	0.922956	0.786944	Rv0546c	387	0	0.0859375	0	0.0546875	0.0859375	0.0390625	0.09375	0.03125	0.046875	0	0.117188	0.0234375	0	0.0703125	0.0390625	0.101562	0.0546875	0.0546875	0.0546875	0.015625	0.03125	0.165375	0.320413	0.178295	0.335917	0.656331	0.498708	0.1589	0.4393	0.1262	0.4742	0.268
Rv0547c	4.70533	8.41064	0.54938	6.76559	6.79536	6.46658	7.12073	0.654145	6.79235	4.09072	-0.477636	0	-0.390252	0.939632	0.611474	Rv0547c	885	0	0.132653	0.00340136	0.047619	0.047619	0.00680272	0.0714286	0.0136054	0.0680272	0.0238095	0.108844	0.0340136	0.0340136	0.0646259	0.0238095	0.0884354	0.0578231	0.0578231	0.0748299	0.0204082	0.0204082	0.176271	0.336723	0.161582	0.325424	0.662147	0.498305	0.0996	0.502	0.1033	0.464	0.253
Rv0548c	4.75682	9.07515	0.498962	7.78459	7.84571	7.60944	8.09681	0.487373	6.79359	5.76431	-1.18282	0	-0.424627	0.923589	0.5771	menB	945	0	0.117834	0.00955414	0.0796178	0.044586	0.0541401	0.0955414	0.0286624	0.022293	0.0254777	0.0796178	0.022293	0.0254777	0.0414013	0.0477707	0.0828025	0.044586	0.0477707	0.0828025	0.0159236	0.0318471	0.177778	0.324868	0.166138	0.331217	0.656085	0.491005	0.1203	0.5677	0.1039	0.4286	0.294
Rv0549c	1.25174	9.83489	0.979545	6.46763	6.42409	5.95335	6.94903	0.995674	6.78358	7.66654	-0.28636	0	0.0220221	0.957523	1.02375	vapC3	414	0	0.189781	0.00729927	0.0583942	0.0510949	0.00729927	0.0437956	0.0291971	0.00729927	0	0.138686	0.0291971	0	0.0437956	0.0218978	0.109489	0.0729927	0.0729927	0.0875912	0.0145985	0.0145985	0.137681	0.323671	0.18599	0.352657	0.676329	0.509662	0.1639	0.3607	0.1207	0.4696	0.218
Rv0550c	0	9.38381	1.04043	5.62833	5.55417	5.00428	6.20325	1.19897	6.77753	5.69897	0.016698	0.00223714	0.00773626	1.03269	1.00946	vapB3	267	0	0.170455	0.0227273	0.0681818	0.0909091	0.0113636	0.0454545	0.0113636	0.0340909	0.0113636	0.113636	0.0227273	0.0340909	0.0227273	0.0113636	0.102273	0.0568182	0.0681818	0.0795455	0.0113636	0.0113636	0.179775	0.243446	0.205993	0.370787	0.614232	0.449438	0.2105	0.3421	0.0972	0.5362	0.196
Rv0551c	2.57666	7.96599	0.653961	5.43347	5.43063	5.06824	5.80587	0.737626	6.7884	5.22866	0.10205	0	-0.401379	1.05534	0.600348	fadD8	1716	0	0.117338	0.0105079	0.0595447	0.0542907	0.0262697	0.0963222	0.0227671	0.0472855	0.0367776	0.0980736	0.0210158	0.0175131	0.0647986	0.0402802	0.0577933	0.0490368	0.0542907	0.0910683	0.0105079	0.0245184	0.179487	0.317016	0.164336	0.339161	0.656177	0.481352	0.0983	0.5	0.1085	0.5	0.286
Rv0552	1.37612	7.67527	0.620945	5.60236	5.60621	5.32718	5.87112	0.543945	6.78898	13.1131	-1.38985	0	-0.41452	1.03547	0.587207	Rv0552	1605	1	0.129213	0.0149813	0.0786517	0.0505618	0.0205993	0.0973783	0.0205993	0.0505618	0.0093633	0.0861423	0.0224719	0.0262172	0.0617978	0.0262172	0.0842697	0.0355805	0.0543071	0.0917603	0.0168539	0.0224719	0.157009	0.330841	0.16947	0.342679	0.67352	0.500312	0.1499	0.5118	0.0819	0.4381	0.269
Rv0553	0	8.24055	0.891064	4.68643	4.66362	4.28673	5.07445	0.787723	6.77515	9.13872	-0.40432	0.00223714	-0.259599	1.15066	0.742127	menC	981	1	0.202454	0.0153374	0.0521472	0.0644172	0.0214724	0.0705521	0.00306748	0.0429448	0.0153374	0.0981595	0.00920245	0.00920245	0.0828221	0.0276074	0.0736196	0.0306748	0.0337423	0.116564	0.0153374	0.0153374	0.124363	0.332314	0.173293	0.370031	0.702345	0.505607	0.1373	0.4542	0.0783	0.4831	0.252
Rv0554	3.12659	8.56656	0.935259	6.60364	6.73718	5.9289	7.29819	1.36929	6.78536	2.8242	-0.453423	0	-0.0134375	0.948696	0.988289	bpoC	789	1	0.141221	0.0114504	0.0648855	0.0419847	0.0534351	0.0801527	0.0114504	0.0458015	0.019084	0.0839695	0.0305344	0.0419847	0.0648855	0.0305344	0.0687023	0.0305344	0.0610687	0.0801527	0.0114504	0.0267176	0.176172	0.33967	0.17744	0.306717	0.646388	0.51711	0.1228	0.5526	0.1117	0.4108	0.297
Rv0555	4.42284	9.17618	0.661237	7.50517	7.57921	7.19192	7.90732	0.715406	6.79169	5.8671	-0.949658	0	-0.261082	0.92232	0.740644	menD	1665	1	0.133574	0.00902527	0.0559567	0.0379061	0.0162455	0.0938628	0.0270758	0.0433213	0.00541516	0.104693	0.0108303	0.0288809	0.0884477	0.0270758	0.0794224	0.0559567	0.0703971	0.0920578	0.00722022	0.0126354	0.146547	0.356156	0.156156	0.341141	0.697297	0.512312	0.0889	0.4704	0.0931	0.5	0.277
Rv0556	4.5991	10.0623	0.781891	7.65057	7.78858	7.188	8.24005	1.05204	6.79031	3.85284	-0.804948	0	-0.14079	0.922681	0.860936	Rv0556	516	1	0.111111	0	0.0350877	0.0409357	0.00584795	0.0643275	0.0175439	0.0877193	0.0175439	0.134503	0.0175439	0.0350877	0.0526316	0.0292398	0.0994152	0.0584795	0.0467836	0.105263	0.0175439	0.0233918	0.182171	0.27907	0.213178	0.325581	0.604651	0.492248	0.1921	0.3311	0.137	0.5115	0.207
Rv0557	3.7232	9.1752	0.711217	6.86075	6.941	6.46678	7.33427	0.867492	6.79016	4.37842	-0.694378	0	-0.223808	0.935026	0.777918	mgtA	1137	1	0.121693	0.00793651	0.0449735	0.047619	0.031746	0.0873016	0.0449735	0.026455	0.0132275	0.0978836	0.0185185	0.00793651	0.0714286	0.0238095	0.111111	0.047619	0.0502646	0.113757	0.0132275	0.0185185	0.153034	0.32102	0.177661	0.348285	0.669305	0.498681	0.1403	0.406	0.1461	0.4664	0.227
Rv0558	4.69646	9.81284	0.667846	7.73403	7.78246	7.31829	8.16823	0.849937	6.79192	4.44313	-0.351018	0	-0.255355	0.923202	0.746371	menH	705	1	0.15812	0.00854701	0.0555556	0.0299145	0.0299145	0.0811966	0.00854701	0.0213675	0.0384615	0.0897436	0.0213675	0.025641	0.0470085	0.034188	0.0940171	0.0598291	0.0598291	0.0854701	0.0213675	0.0299145	0.158865	0.319149	0.17305	0.348936	0.668085	0.492199	0.135	0.465	0.0856	0.4835	0.214
Rv0559c	6.42345	14.3656	0.742589	9.7519	9.81324	9.44651	10.1439	0.697431	6.79274	7.28173	-0.598673	0	-0.232749	0.975338	0.768978	Rv0559c	339	0	0.142857	0.0178571	0.0625	0.0178571	0.0446429	0.0982143	0.0267857	0.0357143	0.0357143	0.0714286	0.0178571	0.0357143	0.0446429	0.0625	0.0625	0.0357143	0.0625	0.0714286	0.00892857	0.0446429	0.20059	0.321534	0.174041	0.303835	0.625369	0.495575	0.1667	0.5417	0.1084	0.4051	0.354
Rv0560c	2.24342	15.3123	1.0821	6.30819	6.16079	5.71902	6.61575	0.896732	6.78212	14.1175	2.14405	0	0.112655	0.969449	1.11438	Rv0560c	726	0	0.136929	0.00414938	0.0539419	0.0871369	0.0456432	0.0912863	0.0207469	0.0580913	0.0165975	0.0954357	0.0165975	0.0124481	0.0539419	0.0165975	0.0622407	0.0746888	0.0373444	0.0705394	0.0124481	0.033195	0.172176	0.319559	0.179063	0.329201	0.64876	0.498623	0.1024	0.5268	0.1295	0.4469	0.253
Rv0561c	1.74148	7.78914	0.595954	5.51368	5.53466	5.30833	5.75988	0.45155	6.78943	11.5872	-1.19678	0	-0.449588	1.04554	0.552139	Rv0561c	1227	0	0.112745	0.00735294	0.0759804	0.0318627	0.0220588	0.115196	0.0171569	0.0269608	0.0122549	0.117647	0.0196078	0.0171569	0.0563725	0.00980392	0.105392	0.0710784	0.0465686	0.0857843	0.0269608	0.0220588	0.140179	0.327628	0.171964	0.360228	0.687857	0.499593	0.106	0.481	0.1111	0.4409	0.243
Rv0562	3.55802	9.87694	0.635745	8.20199	8.28099	7.94222	8.60081	0.658596	6.79253	10.344	-1.65631	0	-0.294474	0.930219	0.707252	grcC1	1008	1	0.149254	0.00298507	0.0776119	0.0567164	0.0208955	0.0895522	0.0179104	0.0358209	0.0149254	0.110448	0.0268657	0.0179104	0.038806	0.041791	0.080597	0.0477612	0.0537313	0.0955224	0.00298507	0.0179104	0.164683	0.311508	0.157738	0.366071	0.677579	0.469246	0.0972	0.4722	0.0949	0.5191	0.277
Rv0563	6.38992	13.5981	1.15173	8.4434	8.17611	7.77852	8.76266	0.984142	6.787	7.53107	1.78849	0	0.2146	0.937125	1.21633	htpX	861	1	0.171329	0.0104895	0.0244755	0.0384615	0.0314685	0.0664336	0.027972	0.0524476	0.0104895	0.125874	0.0454545	0.0454545	0.0594406	0.0244755	0.0804196	0.0524476	0.041958	0.0629371	0.00699301	0.020979	0.15331	0.325203	0.184669	0.336818	0.662021	0.509872	0.124	0.424	0.0667	0.5667	0.313
Rv0564c	3.01983	8.10266	0.893828	5.87249	5.76387	5.2604	6.6492	1.3888	6.78396	2.61453	-0.0832527	0	-0.114952	1.00878	0.886774	gpdA1	1026	0	0.117302	0.00879765	0.0351906	0.0645161	0.026393	0.111437	0.0234604	0.0469208	0.026393	0.0762463	0.0351906	0.0410557	0.0381232	0.026393	0.0703812	0.0527859	0.058651	0.117302	0.00879765	0.0146628	0.18616	0.323587	0.15692	0.333333	0.65692	0.480507	0.0839	0.5979	0.1164	0.3822	0.275
Rv0565c	1.98568	7.99913	0.89583	5.52327	5.54977	4.95874	6.12677	1.16803	6.78189	4.36214	-0.48741	0	-0.14858	1.04441	0.853147	Rv0565c	1461	0	0.102881	0.00617284	0.0699588	0.0452675	0.0411523	0.0761317	0.0349794	0.0617284	0.0390947	0.0740741	0.0185185	0.026749	0.0514403	0.0185185	0.0679012	0.0514403	0.0720165	0.0658436	0.0246914	0.0514403	0.204654	0.336756	0.169747	0.288843	0.625599	0.506502	0.0916	0.6145	0.119	0.4025	0.358
Rv0566c	0	9.07694	1.03632	6.44626	6.58344	5.88218	7.12764	1.24546	6.78148	5.50388	-0.956732	0.00111857	0.0772986	0.959019	1.07903	Rv0566c	492	0	0.116564	0	0.0920245	0.0674847	0.0368098	0.0490798	0	0.0552147	0.122699	0.0674847	0.0122699	0.0306748	0.0122699	0.0490798	0.0613497	0.0613497	0.0613497	0.0858896	0.00613497	0.0122699	0.245935	0.319106	0.132114	0.302846	0.621951	0.45122	0.0496	0.7438	0.0682	0.4472	0.325
Rv0567	4.93938	10.3377	0.802027	7.73367	7.80297	7.19078	8.31412	1.12334	6.79025	3.05231	-0.290583	0	-0.121172	0.923199	0.880554	Rv0567	1020	1	0.141593	0.0147493	0.0737463	0.0678466	0.0501475	0.0855457	0.0147493	0.0442478	0.0353982	0.120944	0.0265487	0.020649	0.0412979	0.020649	0.0766962	0.0412979	0.0442478	0.0412979	0.0117994	0.0265487	0.173529	0.302941	0.189216	0.334314	0.637255	0.492157	0.1368	0.4947	0.1042	0.4918	0.261
Rv0568	5.63995	10.4415	0.69287	8.27256	8.32491	7.84738	8.67499	0.82761	6.79217	4.35725	-0.125252	0	-0.239264	0.932133	0.762463	cyp135B1	1419	1	0.144068	0.00635593	0.0550847	0.0423729	0.0211864	0.0805085	0.0233051	0.0338983	0.0169492	0.112288	0.0338983	0.0169492	0.0614407	0.0190678	0.103814	0.0550847	0.0635593	0.0847458	0.0105932	0.0148305	0.155743	0.337562	0.159972	0.346723	0.684285	0.497533	0.099	0.4855	0.0984	0.4622	0.228
Rv0569	6.19876	14.7252	1.42829	8.51653	8.04264	7.68986	8.84458	1.15472	6.78272	6.14666	1.75035	0	0.489013	0.939273	1.49074	Rv0569	267	1	0.125	0	0.0795455	0.0568182	0.0113636	0.0795455	0.0454545	0.0681818	0.0340909	0.0454545	0.0113636	0.0113636	0.0568182	0.0454545	0.0681818	0.0454545	0.0568182	0.125	0.0227273	0.0113636	0.187266	0.250936	0.179775	0.382022	0.632959	0.430712	0.2055	0.2877	0.0986	0.6462	0.217
Rv0570	1.5639	12.7288	1.50013	6.23415	5.70694	5.38689	6.8451	1.45821	6.76848	5.23153	1.26185	0	0.52455	0.975577	1.52628	nrdZ	2079	1	0.148844	0.017341	0.0563584	0.0621387	0.0346821	0.0867052	0.0144509	0.0404624	0.0187861	0.0939306	0.017341	0.0202312	0.0549133	0.0231214	0.104046	0.0491329	0.0491329	0.0794798	0.00722543	0.0216763	0.154882	0.320346	0.171236	0.353535	0.673882	0.491582	0.1391	0.4636	0.0979	0.4813	0.237
Rv0571c	3.79926	10.2857	1.11729	6.01605	5.72752	5.32759	6.47497	1.14738	6.77931	4.0646	1.09043	0	0.122172	0.995116	1.1239	Rv0571c	1332	0	0.142212	0.0112867	0.0744921	0.0474041	0.0406321	0.10158	0.0180587	0.0361174	0.0225734	0.0993228	0.00451467	0.0158014	0.0586907	0.0383747	0.0790068	0.0316027	0.0428894	0.121896	0.00451467	0.00902935	0.162162	0.319069	0.172673	0.346096	0.665165	0.491742	0.1228	0.4936	0.1401	0.4224	0.259
Rv0572c	0	13.3363	1.79655	6.74252	6.52458	5.54147	7.47194	1.93046	6.76087	4.33472	0.840504	0.00223714	0.855714	0.940834	1.85744	Rv0572c	342	0	0.0530973	0.00884956	0.0884956	0.0442478	0.0265487	0.0707965	0.0530973	0.0265487	0.0442478	0.0619469	0.0353982	0.0176991	0.0530973	0.0442478	0.106195	0.0884956	0.0619469	0.079646	0	0.0353982	0.22807	0.309942	0.178363	0.283626	0.593567	0.488304	0.1809	0.4894	0.1807	0.3875	0.188
Rv0573c	0	8.5	1.23355	4.20319	4.06249	3.23112	4.98515	1.75402	6.75248	3.17946	0.487053	0.00223714	0.0245876	1.20897	1.02631	pncB2	1392	0	0.140389	0.00647948	0.0647948	0.0539957	0.0518359	0.0842333	0.0215983	0.0388769	0.0259179	0.0993521	0.0172786	0.0172786	0.0453564	0.0367171	0.0842333	0.0431965	0.049676	0.0820734	0.00863931	0.0280778	0.165948	0.331897	0.171695	0.33046	0.662356	0.503592	0.1108	0.5441	0.0937	0.4551	0.261
Rv0574c	2.02685	10.5693	1.57501	5.00628	4.44339	3.95123	5.81038	1.85915	6.74986	3.83217	1.14075	0	0.463281	1.11173	1.46501	Rv0574c	1143	0	0.105263	0.0105263	0.0736842	0.0447368	0.0131579	0.0894737	0.0315789	0.0526316	0.0131579	0.0973684	0.0210526	0.0315789	0.0605263	0.0236842	0.0947368	0.0473684	0.05	0.0947368	0.0210526	0.0236842	0.173228	0.321085	0.177603	0.328084	0.649169	0.498688	0.1557	0.485	0.1186	0.4218	0.238
Rv0575c	0	9.70104	1.40289	4.33606	4.17566	3.50223	5.00019	1.49797	6.74245	4.27185	0.584645	0.0033557	0.209998	1.19289	1.21172	Rv0575c	1167	0	0.108247	0.00773196	0.0927835	0.0489691	0.064433	0.100515	0.0231959	0.0463918	0.0257732	0.0773196	0.0231959	0.0128866	0.0309278	0.0206186	0.100515	0.0309278	0.056701	0.0798969	0.0180412	0.0309278	0.169666	0.342759	0.16024	0.327335	0.670094	0.502999	0.0595	0.6696	0.0919	0.3849	0.341
Rv0576	3.06103	11.4805	0.662758	6.89204	6.84519	6.59801	7.16627	0.568265	6.79109	11.5402	0.57686	0	-0.270942	0.933699	0.730785	Rv0576	1305	1	0.14977	0.00921659	0.0599078	0.0506912	0.0253456	0.0806452	0.0253456	0.0299539	0.0115207	0.101382	0.0138249	0.00921659	0.062212	0.0437788	0.078341	0.0460829	0.0760369	0.0921659	0.0207373	0.0138249	0.15249	0.344828	0.165517	0.337165	0.681992	0.510345	0.1287	0.4853	0.1064	0.4419	0.282
Rv0577	4.42593	10.9054	0.685446	7.57511	7.50564	7.12687	7.98204	0.855176	6.79165	5.30007	0.497527	0	-0.236944	0.92239	0.764783	TB27.3	786	1	0.141762	0.00383142	0.0727969	0.0383142	0.0306513	0.111111	0.0153257	0.0421456	0.0306513	0.0536398	0.0383142	0.0344828	0.0881226	0.0383142	0.0229885	0.0383142	0.0536398	0.091954	0.0229885	0.0306513	0.187023	0.304071	0.165394	0.343511	0.647583	0.469466	0.1244	0.4977	0.1071	0.4811	0.274
Rv0578c	2.00549	10.601	1.08088	7.02172	7.034	6.2717	7.70793	1.43623	6.7837	3.42322	0.0239806	0	0.151679	0.929197	1.15341	PE_PGRS7	3921	0	0.135528	0	0.0352221	0.00612557	0.0153139	0.460184	0.0137825	0.0137825	0.00689127	0.0306279	0.00382848	0.0566616	0.0313936	0.0191424	0.017611	0.0551302	0.0650842	0.0283308	0.00229709	0.00306279	0.129559	0.326192	0.0915583	0.452691	0.778883	0.417751	0.1385	0.6513	0.0704	0.2021	0.319
Rv0579	3.83443	9.70538	0.843433	7.02624	7.06414	6.4772	7.67663	1.19943	6.78834	3.40484	-0.350148	0	-0.0856339	0.929066	0.916093	Rv0579	759	1	0.0833333	0.015873	0.0634921	0.0595238	0.0357143	0.0674603	0.0277778	0.0357143	0.0119048	0.142857	0.0119048	0.0238095	0.0515873	0.031746	0.126984	0.0515873	0.047619	0.0753968	0.00793651	0.0277778	0.156785	0.322793	0.189723	0.330698	0.653491	0.512516	0.1357	0.457	0.0909	0.5185	0.24
Rv0580c	4.10565	11.2461	0.983606	7.57106	7.55351	6.94742	8.09034	1.14292	6.78728	4.05399	0.26982	0	0.0612256	0.92238	1.06295	Rv0580c	492	0	0.122699	0	0.0613497	0.0368098	0.0368098	0.0613497	0.0306748	0.0429448	0.0306748	0.128834	0.0245399	0.0245399	0.0490798	0.0306748	0.0981595	0.0552147	0.0613497	0.0736196	0.00613497	0.0245399	0.174797	0.347561	0.180894	0.296748	0.644309	0.528455	0.1268	0.5282	0.1008	0.4262	0.243
Rv0581	0	11.1056	1.16016	7.15532	7.14427	6.6245	7.71892	1.09442	6.78165	6.12969	-0.365449	0.00111857	0.234197	0.925962	1.23592	vapB26	216	1	0.15493	0	0.0422535	0.084507	0.0140845	0.112676	0	0.0422535	0.056338	0.0704225	0.0140845	0	0.0704225	0.028169	0.126761	0.0422535	0.028169	0.084507	0	0.028169	0.152778	0.305556	0.138889	0.402778	0.708333	0.444444	0.1186	0.4068	0.0923	0.5484	0.222
Rv0582	3.22081	10.2226	0.892755	6.52944	6.48805	5.98241	7.02187	1.03946	6.78635	4.67999	0.279444	0	-0.0606113	0.953366	0.941115	vapC26	408	1	0.177778	0.0148148	0.0814815	0.0592593	0.0222222	0.0592593	0.0148148	0.0740741	0.00740741	0.0962963	0.00740741	0.0148148	0.0296296	0.0222222	0.0814815	0.0444444	0.0518519	0.0962963	0.00740741	0.037037	0.164216	0.345588	0.178922	0.311275	0.656863	0.52451	0.1393	0.5656	0.1009	0.3737	0.27
Rv0583c	1.96782	9.08151	1.25655	6.55392	6.57862	5.71753	7.599	1.88146	6.77632	3.00046	-0.494618	0	0.304765	0.951787	1.30649	lpqN	687	0	0.114035	0.00438596	0.0745614	0.0219298	0.0263158	0.0789474	0.0175439	0.0526316	0.0350877	0.0789474	0.0131579	0.0350877	0.0877193	0.0438596	0.0175439	0.0789474	0.131579	0.0570175	0.00877193	0.0219298	0.216885	0.368268	0.144105	0.270742	0.63901	0.512373	0.095	0.57	0.1154	0.4059	0.277
Rv0584	2.29083	8.97119	0.742576	4.76914	4.83593	4.27137	5.22919	0.957813	6.78356	5.06961	0.287646	0	-0.398158	1.14073	0.603569	Rv0584	2634	1	0.112885	0.00342075	0.0570125	0.0262258	0.0467503	0.116306	0.013683	0.0421893	0.0125428	0.0684151	0.0125428	0.0387685	0.0649943	0.0250855	0.050171	0.0763968	0.0798176	0.0843786	0.0193843	0.0490308	0.17388	0.329916	0.179575	0.316629	0.646545	0.509491	0.1173	0.5334	0.1021	0.4213	0.26
Rv0585c	2.72714	7.43062	0.700654	4.80835	4.74775	4.37383	5.3372	0.963372	6.78512	4.41457	0.3475	0	-0.435378	1.13603	0.566349	Rv0585c	2388	0	0.152201	0.00880503	0.0289308	0.027673	0.0301887	0.0867925	0.0163522	0.0566038	0.0176101	0.144654	0.0138365	0.0125786	0.045283	0.0327044	0.0566038	0.0566038	0.072956	0.0943396	0.0289308	0.0163522	0.154104	0.311558	0.198492	0.335846	0.647404	0.51005	0.1159	0.4177	0.1326	0.4776	0.23
Rv0586	2.0929	13.043	1.24003	8.39743	8.26534	7.61489	9.26644	1.65154	6.78408	6.80263	-0.587002	0	0.304266	0.935761	1.30599	mce2R	723	1	0.133333	0.00416667	0.0666667	0.0833333	0.025	0.0416667	0.0125	0.025	0.025	0.1375	0.0208333	0.0208333	0.0541667	0.0333333	0.1	0.0583333	0.0583333	0.0791667	0.00833333	0.0125	0.179806	0.301521	0.192254	0.326418	0.627939	0.493776	0.191	0.397	0.1357	0.4611	0.217
Rv0587	2.23758	12.6364	0.981333	7.70494	7.59592	7.17476	8.21293	1.03817	6.78718	8.56046	-0.495074	0	0.0583321	0.923001	1.06006	yrbE2A	798	1	0.120755	0.0150943	0.0226415	0.0301887	0.0415094	0.116981	0.0188679	0.0943396	0.0150943	0.116981	0.00754717	0.0150943	0.0339623	0.0188679	0.0415094	0.0301887	0.109434	0.128302	0.00754717	0.0150943	0.150376	0.322055	0.204261	0.323308	0.645363	0.526316	0.1066	0.5164	0.0749	0.4554	0.269
Rv0588	3.08346	11.8103	0.82152	7.54631	7.57935	7.08325	7.9931	0.909853	6.78956	7.37443	-0.550095	0	-0.100815	0.922335	0.900911	Rv0588	888	1	0.128814	0.00338983	0.0169492	0.040678	0.0474576	0.118644	0.00677966	0.0610169	0.00338983	0.0881356	0.0305085	0.0169492	0.020339	0.020339	0.0711864	0.0677966	0.0779661	0.135593	0.00677966	0.0372881	0.144144	0.300676	0.213964	0.341216	0.641892	0.51464	0.1321	0.483	0.0935	0.4298	0.269
Rv0589	2.66176	10.9728	0.989844	7.14789	7.20463	6.62361	7.68668	1.06307	6.78561	5.55948	-0.667268	0	0.0637328	0.926111	1.06546	mce2A	1215	1	0.111386	0.0049505	0.049505	0.049505	0.029703	0.0915842	0.00990099	0.0445545	0.0247525	0.111386	0.0148515	0.049505	0.0643564	0.0346535	0.0544554	0.0420792	0.0693069	0.0915842	0.0123762	0.039604	0.1893	0.278189	0.204938	0.327572	0.605761	0.483128	0.2057	0.3657	0.1187	0.5166	0.271
Rv0591	0	7.54249	1.07483	4.21469	4.25375	3.61684	4.74083	1.124	6.76127	4.29321	0.0415473	0.00111857	-0.132743	1.20757	0.868984	mce2C	1446	1	0.108108	0.004158	0.04158	0.04158	0.039501	0.0977131	0.00623701	0.037422	0.031185	0.0935551	0.014553	0.047817	0.120582	0.037422	0.0602911	0.045738	0.0706861	0.0790021	0.00831601	0.014553	0.185339	0.334025	0.162517	0.318119	0.652144	0.496542	0.1295	0.446	0.1288	0.4735	0.27
Rv0592	0	6.99991	0.942154	3.91296	3.9408	3.38644	4.43033	1.04389	6.76429	4.69287	-0.0849502	0.0033557	-0.302032	1.24419	0.699694	mce2D	1527	1	0.102362	0.00393701	0.0511811	0.0433071	0.0374016	0.0748031	0.011811	0.0374016	0.0275591	0.110236	0.011811	0.0492126	0.0964567	0.0492126	0.0433071	0.0669291	0.0629921	0.0787402	0.00787402	0.0334646	0.191225	0.332678	0.179437	0.29666	0.629339	0.512115	0.1259	0.4874	0.1117	0.4818	0.292
Rv0593	0	6.83002	1.19295	4.25389	4.18259	3.51444	5.25439	1.73996	6.75169	3.2041	-0.318983	0.00671141	-0.00987852	1.20283	0.991848	lprL	1209	1	0.0970149	0.00746269	0.0547264	0.039801	0.0199005	0.079602	0.0124378	0.0522388	0.0124378	0.129353	0.0149254	0.0572139	0.0671642	0.0348259	0.0746269	0.0547264	0.0870647	0.079602	0.0124378	0.0124378	0.189413	0.322581	0.175352	0.312655	0.635236	0.497932	0.1317	0.4678	0.1012	0.4754	0.29
Rv0594	2.80693	7.75714	0.666357	5.12685	5.20313	4.68873	5.59477	0.90604	6.78702	3.48114	-0.416048	0	-0.429485	1.09584	0.572241	mce2F	1551	1	0.110465	0.0155039	0.0465116	0.0348837	0.0135659	0.0872093	0.0116279	0.0484496	0.0174419	0.0794574	0.0116279	0.0503876	0.0930233	0.0484496	0.0542636	0.0658915	0.0794574	0.0949612	0.00968992	0.0271318	0.192779	0.330754	0.167634	0.308833	0.639587	0.498388	0.1501	0.4636	0.1262	0.4405	0.25
Rv0595c	0	9.7648	0.953677	5.86091	5.97354	5.36323	6.47023	1.10699	6.78131	5.64846	-0.700559	0.00111857	-0.0562213	1.0099	0.945505	vapC4	393	0	0.161538	0	0.0615385	0.0615385	0.0307692	0.0615385	0.00769231	0.0692308	0.0153846	0.1	0.0153846	0.0230769	0.0384615	0.0307692	0.0769231	0.0538462	0.0538462	0.0923077	0.0230769	0.0230769	0.19084	0.335878	0.167939	0.305344	0.641221	0.503817	0.0625	0.5536	0.2056	0.3571	0.229
Rv0596c	0	9.23659	1.01734	5.60122	5.6908	5.13347	6.25264	1.11917	6.77639	7.5518	-1.19686	0.00223714	-0.0182515	1.03559	0.983475	vapB4	258	0	0.0941176	0	0.0588235	0.105882	0	0.0470588	0.0117647	0.0470588	0.0235294	0.117647	0.0117647	0.0352941	0.0588235	0.0235294	0.141176	0.0117647	0.0941176	0.0941176	0.0235294	0	0.197674	0.313953	0.158915	0.329457	0.643411	0.472868	0.1739	0.4493	0.137	0.4203	0.216
Rv0597c	2.72413	9.12446	1.11963	7.11837	7.29024	6.43758	7.95401	1.51643	6.78268	3.1681	-0.721752	0	0.192892	0.926736	1.19462	Rv0597c	1236	0	0.126521	0.00729927	0.0705596	0.0559611	0.0340633	0.0705596	0.0121655	0.0413625	0.0145985	0.121655	0.00973236	0.0170316	0.0656934	0.0145985	0.109489	0.0559611	0.0608273	0.0875912	0.0145985	0.00973236	0.153722	0.343851	0.174757	0.32767	0.671521	0.518608	0.1366	0.4863	0.1091	0.4224	0.242
Rv0598c	4.27307	9.7213	0.841777	7.78906	7.83037	7.29421	8.41883	1.12462	6.78972	3.42048	-0.513179	0	-0.081848	0.923625	0.919879	vapC27	414	0	0.211679	0.00729927	0.0437956	0.0583942	0.0145985	0.0291971	0.0510949	0.0218978	0.0218978	0.138686	0.0145985	0	0.0510949	0.00729927	0.0875912	0.0291971	0.080292	0.0948905	0.0145985	0.0218978	0.15942	0.350242	0.181159	0.309179	0.65942	0.531401	0.1803	0.4344	0.1478	0.375	0.285
Rv0599c	4.62457	9.65552	0.709709	7.14416	7.21806	6.76725	7.60539	0.838137	6.79065	3.78294	-0.555633	0	-0.216478	0.926187	0.785248	vapB27	237	0	0.0897436	0	0.0512821	0.0897436	0.0128205	0.128205	0.0128205	0.0641026	0.0384615	0.102564	0.0128205	0.0128205	0.0512821	0.0128205	0.0769231	0.0384615	0.0769231	0.115385	0	0.0128205	0.198312	0.2827	0.185654	0.333333	0.616034	0.468354	0.2121	0.4394	0.1594	0.3594	0.271
Rv0600c	0	8.38611	1.55161	2.67203	2.60308	1.60659	3.75113	2.14453	6.60466	3.80535	0.562479	0.064877	0.155829	1.39578	1.15756	Rv0600c	507	0	0.125	0	0.10119	0.0416667	0.0416667	0.0952381	0.0654762	0.0595238	0.00595238	0.077381	0.00595238	0.0238095	0.077381	0.00595238	0.0833333	0.0357143	0.107143	0.047619	0	0	0.183432	0.424063	0.128205	0.2643	0.688363	0.552268	0.0943	0.6792	0.1163	0.2521	0.291
Rv0601c	0	8.54325	1.3492	2.59966	2.58207	1.74127	3.31468	1.57341	6.64711	6.09594	0.945171	0.0559284	-0.0554397	1.40464	0.946287	Rv0601c	471	0	0.179487	0.00641026	0.0833333	0.0448718	0.0128205	0.025641	0.025641	0.0384615	0	0.153846	0.0128205	0.00641026	0.0833333	0.0320513	0.0705128	0.0192308	0.115385	0.0769231	0.00641026	0.00641026	0.171975	0.420382	0.131635	0.276008	0.696391	0.552017	0.0496	0.6028	0.145	0.336	0.296
Rv0602c	0	7.59923	1.05703	2.83964	2.76915	2.35795	3.16854	0.810587	6.7229	8.3629	1.22419	0.0201342	-0.318225	1.37525	0.683502	tcrA	762	0	0.106719	0.0118577	0.0869565	0.0592885	0.0197628	0.0909091	0.0237154	0.0434783	0.0197628	0.110672	0.0197628	0.00790514	0.0513834	0.00790514	0.13834	0.0237154	0.0632411	0.0790514	0.0118577	0.0237154	0.164042	0.346457	0.144357	0.345144	0.691601	0.490814	0.0804	0.5491	0.1188	0.4241	0.275
Rv0603	0	9.11386	1.51387	3.11978	3.07148	2.35052	3.79915	1.44863	6.65829	5.15894	0.601021	0.0581655	0.172906	1.34097	1.17463	Rv0603	312	1	0.194175	0	0.0970874	0.0776699	0.0291262	0.165049	0.00970874	0.038835	0	0.0291262	0.00970874	0.00970874	0.038835	0.0194175	0.0679612	0.0194175	0.0679612	0.116505	0	0.00970874	0.137821	0.342949	0.115385	0.403846	0.746795	0.458333	0.0652	0.6196	0.0698	0.4024	0.295
Rv0604	0.685188	8.46113	0.836234	5.95068	6.03678	5.54873	6.35647	0.807744	6.78489	8.53441	-1.0315	0	-0.16505	1.00128	0.836676	lpqO	951	1	0.170886	0.00316456	0.0886076	0.0253165	0.028481	0.101266	0.0221519	0.0411392	0.0221519	0.0917722	0.028481	0.0189873	0.0443038	0.0348101	0.0601266	0.0537975	0.0759494	0.0632911	0.0158228	0.00949367	0.169295	0.370137	0.134595	0.325973	0.696109	0.504732	0.0543	0.6196	0.1008	0.3872	0.311
Rv0605	4.59453	12.2147	1.08188	7.1083	6.89533	6.35501	7.68521	1.3302	6.78466	5.71273	1.23674	0	0.154923	0.926962	1.15665	Rv0605	585	1	0.170103	0.0103093	0.0721649	0.056701	0.0206186	0.0463918	0.0257732	0.0206186	0.0360825	0.0773196	0.0154639	0.0206186	0.0257732	0.0309278	0.103093	0.0515464	0.0412371	0.134021	0.0206186	0.0206186	0.150427	0.264957	0.208547	0.376068	0.641026	0.473504	0.2577	0.3313	0.0519	0.5533	0.205
Rv0607	0	11.8358	1.12096	5.63239	5.60381	5.16603	6.01908	0.853046	6.77571	10.2866	0.97219	0.00111857	0.08869	1.03227	1.09042	Rv0607	387	1	0.132812	0.0234375	0.0859375	0.078125	0.0390625	0.09375	0.0078125	0.03125	0.0078125	0.101562	0.0234375	0.03125	0.0390625	0.0390625	0.0859375	0.046875	0.03125	0.0546875	0.046875	0	0.170543	0.294574	0.175711	0.359173	0.653747	0.470284	0.1635	0.5	0.1458	0.4022	0.245
Rv0608	4.87002	11.5196	0.951877	8.80607	8.77978	8.30443	9.35582	1.05139	6.78972	4.61056	-0.428146	0	0.00525416	0.946622	1.00698	vapB28	246	1	0.185185	0	0.0740741	0.0493827	0	0.037037	0.037037	0.0493827	0.0617284	0.123457	0.0246914	0.0246914	0.037037	0.037037	0.0987654	0.0617284	0.037037	0.0493827	0	0.0123457	0.215447	0.304878	0.146341	0.333333	0.638211	0.45122	0.1493	0.4328	0.1045	0.5238	0.321
Rv0609	3.9657	10.4467	0.900564	7.65133	7.62989	7.15588	8.23878	1.0829	6.78861	4.29874	-0.376488	0	-0.0221213	0.922685	0.979605	vapC28	402	1	0.165414	0.0150376	0.105263	0.0676692	0.0300752	0.0676692	0.0150376	0.0601504	0.0075188	0.105263	0.0075188	0.0225564	0.0300752	0.0225564	0.105263	0.0526316	0.0225564	0.0601504	0.0075188	0.0300752	0.18408	0.318408	0.166667	0.330846	0.649254	0.485075	0.1261	0.5294	0.1456	0.4105	0.283
Rv0609A	2.67349	10.1528	0.930474	7.29626	7.43089	6.85118	7.84841	0.997238	6.78715	5.52362	-0.793067	0	0.0067913	0.923682	1.00852	Rv0609A	228	1	0.12	0.0266667	0.0533333	0.0266667	0.0266667	0.133333	0.04	0.0133333	0.0266667	0.0533333	0.0133333	0.0133333	0.0666667	0.0133333	0.12	0.0933333	0.0266667	0.08	0.0266667	0.0266667	0.149123	0.263158	0.197368	0.390351	0.653509	0.460526	0.25	0.2794	0.1525	0.4828	0.233
Rv0610c	1.25077	9.12094	0.835427	6.27541	6.3824	6.00913	6.69712	0.687994	6.78583	10.6151	-1.46276	0	-0.136697	0.972123	0.86503	Rv0610c	1158	0	0.137662	0.00779221	0.0675325	0.0675325	0.0207792	0.0779221	0.0207792	0.0285714	0.0207792	0.116883	0.0103896	0.012987	0.0779221	0.0233766	0.114286	0.0415584	0.0415584	0.0623377	0.0363636	0.012987	0.151986	0.34715	0.157168	0.343696	0.690846	0.504318	0.1265	0.5	0.125	0.4153	0.252
Rv0611c	4.9405	11.5612	0.961349	8.72973	8.79554	8.13259	9.40906	1.27647	6.78948	3.76717	-0.529077	0	0.0165008	0.944848	1.01823	Rv0611c	222	0	0.136986	0.0136986	0.0958904	0.0547945	0.0136986	0.0958904	0.0273973	0.0410959	0.0136986	0.0410959	0.0136986	0.0136986	0.0410959	0	0.109589	0.0136986	0.0547945	0.178082	0	0.0410959	0.18018	0.297297	0.175676	0.346847	0.644144	0.472973	0.1493	0.4925	0.193	0.3333	0.192
Rv0612	1.36416	11.124	1.16388	5.52167	5.4552	4.82206	6.09274	1.27068	6.77362	5.31268	0.604029	0	0.119283	1.0446	1.12101	Rv0612	606	1	0.179104	0	0.0696517	0.0746269	0.0447761	0.0746269	0.00995025	0.039801	0.0248756	0.0746269	0.0199005	0.0149254	0.0696517	0.0199005	0.134328	0.0447761	0.0149254	0.0497512	0.0199005	0.0199005	0.148515	0.326733	0.140264	0.384488	0.711221	0.466997	0.0706	0.4471	0.1173	0.5649	0.258
Rv0613c	1.75025	10.9652	1.01029	7.4417	7.62143	6.91273	8.12646	1.21373	6.78565	7.35049	-1.26194	0	0.0878328	0.922459	1.08956	Rv0613c	2568	0	0.14152	0.00935673	0.100585	0.0853801	0.0222222	0.0748538	0.0210526	0.025731	0.00818713	0.14269	0.0128655	0.00935673	0.0619883	0.0163743	0.0877193	0.0280702	0.0561404	0.0690058	0.0163743	0.0105263	0.147586	0.343847	0.139408	0.369159	0.713006	0.483255	0.0665	0.5102	0.0835	0.528	0.283
Rv0614	0	7.19724	1.09997	3.2448	3.17147	2.48458	3.9654	1.48082	6.73561	3.91245	0.428394	0.00671141	-0.225707	1.32568	0.77602	Rv0614	993	1	0.140562	0.00803213	0.0682731	0.0281124	0.0321285	0.104418	0.0120482	0.0481928	0.0120482	0.0722892	0.00803213	0.0281124	0.0722892	0.060241	0.0522088	0.0522088	0.108434	0.0722892	0.0160643	0.00401606	0.173212	0.344411	0.160121	0.322256	0.666667	0.504532	0.1461	0.5114	0.1408	0.366	0.281
Rv0615	2.9505	12.2418	0.973774	8.06293	8.09089	7.42474	8.62906	1.20431	6.7882	6.69199	-0.244556	0	0.0467895	0.926984	1.04852	Rv0615	243	1	0.2125	0	0.0125	0.025	0.0125	0.1125	0.025	0.0375	0	0.15	0.0375	0.0125	0.025	0.0125	0.075	0.0375	0.0375	0.125	0.025	0.025	0.119342	0.288066	0.197531	0.395062	0.683128	0.485597	0.1096	0.3699	0.1159	0.5	0.265
Rv0616A	3.43434	10.6974	0.901452	7.73062	7.75964	7.20103	8.29182	1.09079	6.78871	4.88666	-0.436527	0	-0.0217249	0.923177	0.980002	vapB29	228	1	0.0933333	0	0.0933333	0.0533333	0	0.04	0.0266667	0.0266667	0.0133333	0.133333	0.0266667	0.0133333	0.0533333	0.04	0.106667	0.08	0.12	0.08	0	0	0.201754	0.328947	0.162281	0.307018	0.635965	0.491228	0.1061	0.4545	0.1562	0.4355	0.198
Rv0617	1.75898	10.4467	0.85683	7.30801	7.38597	6.78311	7.9051	1.12199	6.78833	8.13399	-1.13813	0	-0.0667016	0.923531	0.935025	vapC29	402	1	0.165414	0.0150376	0.075188	0.0225564	0.0300752	0.0676692	0.0601504	0.0150376	0	0.112782	0.0225564	0.0075188	0.0225564	0.0451128	0.0451128	0.0676692	0.075188	0.12782	0.0150376	0.0075188	0.161692	0.318408	0.189055	0.330846	0.649254	0.507463	0.15	0.45	0.1456	0.4158	0.248
Rv0618	0.704686	9.50094	0.918727	4.97412	5.08837	4.59988	5.47792	0.878046	6.77674	7.44318	-0.83176	0	-0.197123	1.11585	0.804604	galT	1082	1	NA	NA	NA	NA	NA	NA	NA	NA	NA	NA	NA	NA	NA	NA	NA	NA	NA	NA	NA	NA	0.143253	0.342884	0.177449	0.336414	0.679298	0.520333	NA	NA	NA	NA	NA
Rv0621	1.32203	9.40182	1.11707	5.20079	5.17193	4.49456	5.8384	1.34384	6.77266	3.88669	0.402897	0	0.0311545	1.08591	1.03288	Rv0621	1065	1	0.169492	0.0141243	0.0621469	0.0367232	0.0310734	0.0903955	0.0141243	0.0169492	0.00847458	0.0564972	0.0141243	0.019774	0.079096	0.019774	0.0819209	0.079096	0.0621469	0.107345	0.0225989	0.0141243	0.139906	0.328638	0.16338	0.368075	0.696714	0.492019	0.1321	0.4277	0.1119	0.4679	0.201
Rv0622	1.28828	8.45309	0.910658	4.31147	4.13488	3.75848	4.80447	1.04599	6.77423	4.61043	0.924578	0	-0.285204	1.19586	0.716523	Rv0622	948	1	0.0984127	0.0253968	0.0603175	0.0412698	0.0444444	0.133333	0.0126984	0.0285714	0.0190476	0.0730159	0.00952381	0.0190476	0.0380952	0.0539683	0.0634921	0.0730159	0.0730159	0.0857143	0.015873	0.031746	0.171941	0.297468	0.188819	0.341772	0.639241	0.486287	0.1587	0.4723	0.1341	0.4346	0.246
Rv0623	1.74198	11.4936	1.23299	7.18773	7.1992	6.7462	7.71797	0.971771	6.77962	7.72641	-0.695853	0	0.307641	0.925351	1.30937	vapB30	255	1	0.202381	0.0119048	0.047619	0.0952381	0	0.047619	0.0238095	0.0357143	0.0119048	0.130952	0.0119048	0.0119048	0.047619	0	0.154762	0.0238095	0.0595238	0.0714286	0	0.0119048	0.137255	0.313725	0.172549	0.376471	0.690196	0.486275	0.1892	0.3784	0.0676	0.507	0.212
Rv0624	3.80333	10.4848	0.807211	7.15165	7.13118	6.67816	7.55071	0.872557	6.78933	4.6661	0.237567	0	-0.118824	0.926036	0.882902	vapC30	396	1	0.167939	0.00763359	0.0839695	0.0687023	0.0381679	0.0763359	0.0381679	0.0381679	0.0229008	0.10687	0.0229008	0.00763359	0.0305344	0.0229008	0.0687023	0.0458015	0.0458015	0.0610687	0.00763359	0.0381679	0.189394	0.333333	0.166667	0.310606	0.643939	0.5	0.125	0.5536	0.1515	0.383	0.277
Rv0625c	1.86895	8.5393	0.946443	6.03966	6.1283	5.68272	6.59435	0.911627	6.78218	6.48356	-1.23716	0	-0.0464735	0.992916	0.955253	Rv0625c	741	0	0.186992	0.0121951	0.0447154	0.0162602	0.0528455	0.126016	0.0162602	0.0406504	0	0.0813008	0.0121951	0.00406504	0.0447154	0.0121951	0.0853659	0.0569106	0.0487805	0.121951	0.0162602	0.0203252	0.116059	0.329285	0.187584	0.367072	0.696356	0.516869	0.1078	0.4741	0.1287	0.4062	0.279
Rv0626	0	11.1608	1.12115	7.82658	7.97432	7.47653	8.36728	0.890749	6.7828	16.2983	-2.75681	0.00111857	0.197213	0.923938	1.19894	vapB5	261	1	0.0930233	0	0.0697674	0.0581395	0.0116279	0.0813953	0	0.0232558	0.0116279	0.116279	0.0116279	0.0232558	0.0581395	0.0116279	0.174419	0.0581395	0.0813953	0.104651	0.0116279	0	0.130268	0.333333	0.168582	0.367816	0.701149	0.501916	0.1818	0.4416	0.04	0.4521	0.225
Rv0627	1.73909	11.3147	0.978252	7.37422	7.49493	7.08323	7.85414	0.770912	6.78589	9.70139	-1.6232	0	0.0553952	0.922857	1.05712	vapC5	408	1	0.185185	0	0.0962963	0.0518519	0.0148148	0.037037	0.00740741	0.0666667	0	0.103704	0.0222222	0.00740741	0.0296296	0.0222222	0.0962963	0.0518519	0.0888889	0.103704	0.0148148	0	0.156863	0.352941	0.154412	0.335784	0.688725	0.507353	0.0826	0.5455	0.0965	0.419	0.213
Rv0628c	2.20348	11.0901	1.15381	7.08683	6.99356	6.49705	7.80716	1.31011	6.78198	5.13573	-0.177404	0	0.226343	0.927466	1.22807	Rv0628c	1152	0	0.127937	0.0078329	0.0600522	0.0548303	0.0339426	0.133159	0.0339426	0.0443864	0.00261097	0.112272	0.0104439	0.0130548	0.0600522	0.0234987	0.073107	0.0417755	0.0548303	0.101828	0.00261097	0.0078329	0.123264	0.337674	0.154514	0.384549	0.722222	0.492188	0.069	0.4914	0.0502	0.5563	0.279
Rv0629c	0.454001	8.18124	0.891486	5.01004	5.11375	4.65173	5.43498	0.783251	6.77824	7.45886	-0.654702	0	-0.21976	1.11125	0.781967	recD	1728	0	0.149565	0.00869565	0.0730435	0.0521739	0.013913	0.08	0.0226087	0.0191304	0.0156522	0.135652	0.0156522	0.0104348	0.0469565	0.0278261	0.106087	0.0417391	0.053913	0.102609	0.0121739	0.0121739	0.132523	0.309606	0.167824	0.390046	0.699653	0.477431	0.1129	0.3941	0.071	0.5769	0.215
Rv0630c	0	8.39714	0.917158	4.29691	4.3901	3.86509	4.75431	0.889217	6.7721	6.73458	0.338742	0.00111857	-0.280464	1.19762	0.721262	recB	3285	0	0.14808	0.00731261	0.0740402	0.0566728	0.0292505	0.0813528	0.0301645	0.0246801	0.0146252	0.120658	0.0100548	0.0137112	0.0530165	0.0310786	0.0987203	0.0429616	0.0539305	0.0758684	0.0137112	0.0201097	0.140335	0.340335	0.157991	0.361339	0.701674	0.498326	0.1098	0.4864	0.0582	0.5259	0.266
Rv0631c	0.168799	8.43773	0.959974	4.25132	4.28284	3.72377	4.67831	0.954538	6.76906	7.24108	0.41967	0	-0.243164	1.20314	0.758563	recC	3294	0	0.134913	0.0127621	0.0847767	0.0419325	0.0255242	0.0765725	0.0282589	0.0227894	0.0127621	0.139471	0.00729262	0.0118505	0.077484	0.0319052	0.101185	0.0328168	0.0592525	0.0674567	0.0227894	0.00820419	0.139041	0.367031	0.145416	0.348512	0.715543	0.512447	0.0691	0.5139	0.0856	0.4982	0.253
Rv0632c	6.05331	10.8108	0.643294	9.08312	9.17701	8.86411	9.44208	0.577971	6.79311	6.47115	-1.30731	0	-0.31051	0.953804	0.691217	echA3	696	0	0.177489	0.00865801	0.0606061	0.047619	0.038961	0.0909091	0.021645	0.0692641	0.030303	0.0909091	0.034632	0.030303	0.030303	0.030303	0.0562771	0.047619	0.047619	0.0606061	0	0.025974	0.192529	0.314655	0.170977	0.321839	0.636494	0.485632	0.1162	0.5354	0.1111	0.4512	0.294
Rv0633c	3.79225	9.31822	0.641156	7.02748	7.14036	6.72178	7.45445	0.732664	6.79135	6.36592	-1.21283	0	-0.287874	0.929031	0.713852	Rv0633c	840	0	0.100358	0	0.0501792	0.0752688	0.0286738	0.0537634	0.0179211	0.0286738	0.0215054	0.078853	0.0250896	0.0215054	0.0681004	0.046595	0.11828	0.0430108	0.0573477	0.09319	0.0430108	0.0286738	0.175	0.311905	0.164286	0.34881	0.660714	0.47619	0.1227	0.4864	0.1005	0.4929	0.219
Rv0634A	3.88079	13.5713	1.11967	9.73494	9.88265	9.24422	10.4044	1.16022	6.78858	8.03639	-1.4455	0	0.144945	0.974728	1.14667	Rv0634A	252	1	0.0722892	0.0240964	0.120482	0.0843373	0.0120482	0.0963855	0.0240964	0.0361446	0.0361446	0.0843373	0.0240964	0.0240964	0.0240964	0.0120482	0.108434	0.0481928	0.0361446	0.0722892	0.0240964	0.0361446	0.190476	0.234127	0.198413	0.376984	0.611111	0.43254	0.2609	0.3913	0.0667	0.5439	0.186
Rv0634B	3.24503	10.3555	1.05464	7.66638	7.78353	7.02052	8.32041	1.29989	6.78585	4.2723	-0.562354	0	0.131877	0.922766	1.1336	rpmG2	168	1	0.0545455	0.0727273	0.0545455	0.0545455	0.0181818	0.0181818	0.0545455	0.0363636	0.127273	0.0545455	0.0181818	0.0727273	0.0545455	0.0181818	0.127273	0.0363636	0.0727273	0.0363636	0	0.0181818	0.27381	0.303571	0.136905	0.285714	0.589286	0.440476	0.1163	0.5581	0.0789	0.6111	0.416
Rv0634c	6.83673	11.3274	0.623297	9.49923	9.53167	9.25256	9.83536	0.582792	6.79351	5.12868	-0.698394	0	-0.343275	0.966572	0.658451	Rv0634c	714	0	0.0632911	0.0126582	0.092827	0.0464135	0.0379747	0.109705	0.0464135	0.021097	0.0126582	0.118143	0.0379747	0.0126582	0.0548523	0.0295359	0.0590717	0.07173	0.0506329	0.0801688	0.0126582	0.0295359	0.176471	0.305322	0.207283	0.310924	0.616246	0.512605	0.2049	0.4585	0.1462	0.3916	0.256
Rv0635	4.25817	13.2854	1.18679	9.49984	9.68847	8.92148	10.2614	1.33993	6.78748	5.12615	-0.939373	0	0.220202	0.966593	1.22193	hadA	477	1	0.132911	0.0126582	0.0759494	0.0949367	0.0443038	0.0822785	0.0253165	0.056962	0.0506329	0.056962	0.0126582	0.0253165	0.0189873	0.0443038	0.0316456	0.0189873	0.0506329	0.0949367	0.00632911	0.0632911	0.213836	0.255765	0.188679	0.341719	0.597484	0.444444	0.1746	0.5	0.0855	0.5648	0.359
Rv0636	3.08452	12.0842	1.1186	9.38825	9.5241	8.79858	10.1645	1.36588	6.78809	6.65507	-1.29675	0	0.155649	0.962952	1.15738	hadB	429	1	0.0985915	0	0.0633803	0.0422535	0.028169	0.119718	0.0140845	0.0492958	0.0633803	0.0704225	0.0211268	0.0352113	0.0492958	0.0140845	0.0352113	0.056338	0.0774648	0.119718	0.0140845	0.028169	0.188811	0.277389	0.18648	0.347319	0.624709	0.463869	0.1583	0.4833	0.0531	0.5094	0.304
Rv0637	3.78357	12.7561	1.17319	9.75953	9.92588	9.20779	10.5405	1.33269	6.78788	7.21987	-1.50403	0	0.197576	0.975613	1.1993	hadC	501	1	0.0963855	0.0180723	0.0963855	0.0542169	0.060241	0.0662651	0.0240964	0.0481928	0.0421687	0.0722892	0.0421687	0.0120482	0.0240964	0.0481928	0.0722892	0.0240964	0.0542169	0.0963855	0.0180723	0.0301205	0.201597	0.291417	0.193613	0.313373	0.60479	0.48503	0.1364	0.5909	0.0948	0.4537	0.322
Rv0638	7.6881	14.0073	0.666489	10.4261	10.363	10.0266	10.7581	0.731559	6.79368	5.92073	0.632588	0	-0.335197	1.00169	0.66653	secE1	486	1	0.167702	0	0.068323	0.0434783	0.0248447	0.068323	0	0.0124224	0.0807453	0.0621118	0.0310559	0.0248447	0.0434783	0.0186335	0.068323	0.0745342	0.0621118	0.124224	0.00621118	0.0186335	0.197531	0.290123	0.156379	0.355967	0.646091	0.446502	0.1203	0.4586	0.1194	0.4773	0.25
Rv0639	7.64243	13.6675	0.668837	10.5854	10.568	10.1847	10.9375	0.752844	6.7937	5.8708	0.00215968	0	-0.339565	1.0084	0.662161	nusG	717	1	0.130252	0	0.0630252	0.0840336	0.0336134	0.0756303	0.00420168	0.0252101	0.0546218	0.0714286	0.012605	0.0336134	0.0504202	0.0336134	0.0462185	0.0504202	0.0756303	0.121849	0.00840336	0.0252101	0.202232	0.30265	0.158996	0.336123	0.638773	0.461646	0.1192	0.5233	0.1122	0.4632	0.284
Rv0640	6.89578	13.774	0.850425	10.7889	10.743	10.3016	11.2471	0.945541	6.79259	4.6254	-0.00591869	0	-0.166765	1.01719	0.834961	rplK	429	1	0.161972	0.00704225	0.0352113	0.056338	0.0211268	0.0704225	0.0140845	0.0633803	0.105634	0.056338	0.0211268	0.0492958	0.0633803	0.0352113	0.028169	0.0211268	0.0774648	0.0915493	0.00704225	0.0140845	0.226107	0.321678	0.142191	0.310023	0.631702	0.463869	0.1273	0.6	0.0508	0.4771	0.337
Rv0641	6.99865	13.4194	0.797169	10.8695	10.906	10.4203	11.4068	0.986498	6.79295	6.04191	-0.807469	0	-0.223557	1.02073	0.778169	rplA	708	1	0.148936	0	0.0680851	0.0382979	0.0255319	0.0893617	0.00851064	0.0510638	0.0893617	0.0638298	0.0170213	0.0297872	0.0468085	0.0255319	0.0595745	0.0468085	0.0765957	0.093617	0.00425532	0.0170213	0.20339	0.312147	0.149718	0.334746	0.646893	0.461864	0.1289	0.5361	0.0615	0.4863	0.332
Rv0642c	6.05786	12.8296	0.888942	9.44921	9.59276	9.07664	9.94846	0.87182	6.79113	5.61219	-0.814509	0	-0.0759805	0.964922	0.925746	mmaA4	906	0	0.0664452	0.0199336	0.0664452	0.0830565	0.0598007	0.0531561	0.0265781	0.0465116	0.0531561	0.0797342	0.0365449	0.0265781	0.0498339	0.0299003	0.0664452	0.0531561	0.0730897	0.0564784	0.00996678	0.0431894	0.222958	0.320088	0.175497	0.281457	0.601545	0.495585	0.0928	0.6456	0.0981	0.455	0.323
Rv0643c	4.40418	10.9505	0.926233	8.44045	8.51325	7.98277	9.00531	1.02254	6.78942	5.30383	-0.862665	0	-0.0108054	0.937038	0.990921	mmaA3	882	0	0.0819113	0.0170648	0.0784983	0.0614334	0.0580205	0.0580205	0.0341297	0.0546075	0.0477816	0.0887372	0.0341297	0.0273038	0.0273038	0.0409556	0.0511945	0.0477816	0.0750853	0.0682594	0.0102389	0.0375427	0.223356	0.30839	0.184807	0.283447	0.591837	0.493197	0.089	0.6017	0.1262	0.4789	0.341
Rv0644c	3.776	10.0299	0.913859	7.85073	7.86518	7.33856	8.4486	1.11004	6.7886	5.6082	-0.855154	0	-0.010286	0.924145	0.991441	mmaA2	864	0	0.087108	0.010453	0.0696864	0.0662021	0.0592334	0.0627178	0.0418118	0.0487805	0.0383275	0.114983	0.0278746	0.0174216	0.0418118	0.0592334	0.0592334	0.0313589	0.0696864	0.0522648	0.0139373	0.0278746	0.200231	0.321759	0.172454	0.305556	0.627315	0.494213	0.0746	0.5746	0.081	0.5612	0.353
Rv0645c	3.33597	8.8093	0.810928	7.00214	7.08225	6.48155	7.59246	1.11091	6.78868	5.05224	-0.882103	0	-0.118854	0.929782	0.882873	mmaA1	861	0	0.101399	0.0104895	0.0734266	0.0874126	0.0629371	0.0524476	0.020979	0.0384615	0.0314685	0.115385	0.0244755	0.0314685	0.0244755	0.041958	0.0804196	0.041958	0.048951	0.048951	0.0174825	0.0454545	0.216028	0.300813	0.184669	0.29849	0.599303	0.485482	0.1184	0.5526	0.1569	0.4611	0.275
Rv0646c	2.15889	9.28179	0.986271	7.44988	7.59075	7.06545	8.01103	0.94558	6.78606	7.62502	-1.56594	0	0.0638416	0.922429	1.06557	lipG	906	0	0.119601	0.00332226	0.0730897	0.0265781	0.0299003	0.0830565	0.0299003	0.0564784	0.0232558	0.109635	0.0299003	0.0232558	0.0664452	0.0299003	0.0963455	0.0531561	0.0365449	0.0730897	0.013289	0.0232558	0.163355	0.353201	0.157837	0.325607	0.678808	0.511038	0.0717	0.5736	0.0769	0.4608	0.297
Rv0647c	2.43092	9.93861	1.01881	7.60921	7.7085	7.1311	8.17157	1.04047	6.78609	5.99679	-1.10035	0	0.0963099	0.922497	1.09804	Rv0647c	1467	0	0.110656	0	0.0553279	0.0717213	0.0532787	0.0696721	0.0307377	0.0409836	0.0430328	0.10041	0.0266393	0.0122951	0.0491803	0.0409836	0.0819672	0.045082	0.0430328	0.0860656	0.0163934	0.022541	0.176551	0.333333	0.164963	0.325153	0.658487	0.498296	0.0691	0.5831	0.0916	0.489	0.31
Rv0648	0.460711	8.40686	1.13594	3.28964	3.10451	2.69817	3.6692	0.971028	6.7401	6.91704	1.42904	0	-0.184257	1.32019	0.817469	Rv0648	3648	1	0.146502	0.0131687	0.0650206	0.0411523	0.01893	0.0855967	0.0271605	0.0213992	0.0139918	0.102058	0.0115226	0.018107	0.0790123	0.0353909	0.0716049	0.0469136	0.0559671	0.0946502	0.0296296	0.0222222	0.133498	0.354441	0.146656	0.365406	0.719846	0.501096	0.0653	0.518	0.0528	0.5309	0.286
Rv0649	0	8.80056	1.42852	2.61097	2.58741	1.93811	3.23151	1.2934	6.62672	6.14946	0.934131	0.0659955	0.0252684	1.40325	1.02699	fabD2	675	1	0.236607	0.00446429	0.0625	0.0446429	0.0133929	0.0625	0.0223214	0.0178571	0	0.0892857	0.00446429	0.0133929	0.0714286	0.0223214	0.138393	0.0357143	0.0446429	0.09375	0.0133929	0.00892857	0.114074	0.391111	0.115556	0.379259	0.77037	0.506667	0.0585	0.5317	0.0729	0.4521	0.237
Rv0650	0	8.81562	1.376	2.39371	2.25068	1.7242	2.84566	1.12147	6.6356	8.414	1.70342	0.033557	-0.053853	1.42985	0.947874	Rv0650	909	1	0.195364	0.0231788	0.0463576	0.0264901	0.0165563	0.18543	0.0198675	0.0364238	0.00993377	0.109272	0.013245	0.00993377	0.0596026	0.00662252	0.0629139	0.0364238	0.0264901	0.0960265	0.0165563	0.00331126	0.0913091	0.337734	0.157316	0.413641	0.751375	0.49505	0.0964	0.5071	0.0467	0.4553	0.246
Rv0651	2.97313	13.4056	1.28938	8.58699	8.52216	7.83666	9.35465	1.51799	6.78429	4.83961	0.119516	0	0.348115	0.941265	1.34984	rplJ	537	1	0.219101	0.00561798	0.0393258	0.0786517	0.0280899	0.0730337	0.011236	0.0449438	0.0786517	0.106742	0.0168539	0.0224719	0.0337079	0.0168539	0.0449438	0.0393258	0.0674157	0.0561798	0	0.0168539	0.195531	0.335196	0.134078	0.335196	0.670391	0.469274	0.0347	0.5903	0.0915	0.4897	0.278
Rv0652	3.74671	12.8009	1.3433	8.74403	8.79936	7.99275	9.65794	1.66519	6.78358	3.73676	-0.246967	0	0.398123	0.945174	1.39985	rplL	393	1	0.215385	0	0.0615385	0.130769	0.0384615	0.0615385	0	0.0307692	0.115385	0.1	0.0153846	0	0.0307692	0.00769231	0.00769231	0.0307692	0.0461538	0.107692	0	0	0.185751	0.333333	0.139949	0.340967	0.6743	0.473282	0.0632	0.7474	0.0348	0.4234	0.295
Rv0653c	1.05816	10.6448	1.74582	5.62263	5.00596	4.42994	7.02674	2.59679	6.74882	2.53999	0.634305	0	0.712526	1.0333	1.71425	Rv0653c	696	0	0.164502	0.00865801	0.0562771	0.04329	0.034632	0.0822511	0.04329	0.034632	0.012987	0.103896	0.030303	0.012987	0.034632	0.04329	0.0735931	0.034632	0.0779221	0.0822511	0.004329	0.021645	0.175287	0.340517	0.153736	0.33046	0.670977	0.494253	0.09	0.505	0.1319	0.4598	0.261
Rv0654	2.29022	12.2149	1.20246	6.40801	6.14891	5.70069	6.80502	1.10434	6.7792	7.22205	1.53091	0	0.240691	0.961774	1.24242	Rv0654	1506	1	0.0878244	0.011976	0.0658683	0.0499002	0.0259481	0.0978044	0.0359281	0.0339321	0.00399202	0.0798403	0.0219561	0.0339321	0.0798403	0.0259481	0.0838323	0.0459082	0.0678643	0.0918164	0.0179641	0.0379242	0.164011	0.345286	0.167995	0.322709	0.667995	0.51328	0.1224	0.542	0.0827	0.4385	0.313
Rv0655	6.74677	12.3121	1.10912	9.92003	10.0028	9.0887	10.7977	1.709	6.78935	2.47544	-0.322968	0	0.127576	0.981539	1.1293	mkl	1080	1	0.0724234	0.00557103	0.0557103	0.0807799	0.0306407	0.097493	0.0250696	0.0779944	0.0473538	0.100279	0.0362117	0.0222841	0.0529248	0.0306407	0.0668524	0.0584958	0.0557103	0.0612813	0.00557103	0.0167131	0.205556	0.311111	0.163889	0.319444	0.630556	0.475	0.0938	0.566	0.0934	0.4904	0.299
Rv0656c	1.8183	8.79117	1.0172	6.03636	6.00429	5.4416	6.59965	1.15805	6.78136	3.53273	0.122986	0	0.0239748	0.993222	1.0257	vapC6	384	0	0.15748	0.023622	0.102362	0.0472441	0.023622	0.0551181	0.0314961	0.023622	0.00787402	0.0787402	0.023622	0.00787402	0.0393701	0.0314961	0.11811	0.0551181	0.0393701	0.102362	0.015748	0.015748	0.177083	0.315104	0.166667	0.341146	0.65625	0.481771	0.1339	0.4554	0.1959	0.4043	0.194
Rv0657c	3.84299	9.3779	0.627342	7.57084	7.58028	7.18431	7.94778	0.763478	6.7922	5.54925	-0.531207	0	-0.295038	0.92238	0.706689	vapB6	156	0	0.156863	0	0.0980392	0.0980392	0.0196078	0	0.0196078	0.0588235	0.0392157	0.0784314	0.0588235	0.0196078	0	0.0196078	0.137255	0.0392157	0.0392157	0.0980392	0	0.0196078	0.198718	0.314103	0.153846	0.333333	0.647436	0.467949	0.0732	0.5854	0.1	0.4865	0.258
Rv0658c	2.1319	8.68539	0.92348	6.20974	6.20514	5.54175	6.87647	1.33471	6.78444	3.19988	-0.116249	0	-0.054182	0.977662	0.947544	Rv0658c	717	0	0.138655	0.00420168	0.012605	0.0252101	0.0420168	0.105042	0.0168067	0.0504202	0	0.168067	0.012605	0.012605	0.0462185	0.00420168	0.0714286	0.0462185	0.0546218	0.142857	0.0336134	0.012605	0.108787	0.309623	0.238494	0.343096	0.65272	0.548117	0.1448	0.4208	0.1127	0.4167	0.204
Rv0659c	6.44117	12.2495	0.810191	9.5057	9.51501	9.05207	9.99111	0.939034	6.79202	4.28148	-0.340228	0	-0.156597	0.966788	0.845129	mazF2	309	0	0.0980392	0.0294118	0.0490196	0.0490196	0.0294118	0.0588235	0.0196078	0.0294118	0	0.107843	0.00980392	0.0294118	0.0588235	0.00980392	0.156863	0.0392157	0.0980392	0.117647	0.00980392	0	0.177994	0.333333	0.187702	0.300971	0.634304	0.521036	0.1596	0.4681	0.2024	0.2963	0.22
Rv0660c	1.25988	12.7653	1.26731	9.16236	9.09013	8.57468	9.72334	1.14867	6.78526	8.61487	-1.06072	0	0.311248	0.956061	1.31297	mazE2	246	0	0.222222	0	0.17284	0.0617284	0.0123457	0.0246914	0.037037	0.0246914	0	0.123457	0.0123457	0.0123457	0.0246914	0.0246914	0.111111	0.0246914	0.0246914	0.0246914	0.0493827	0.0123457	0.154472	0.345528	0.130081	0.369919	0.715447	0.47561	0.087	0.5507	0.0714	0.5185	0.333
Rv0661c	0	7.87074	1.12342	3.49829	3.56863	3.05523	4.04699	0.991759	6.73248	5.65978	-0.258658	0.0190157	-0.171291	1.29471	0.830436	vapC7	438	0	0.186207	0.0206897	0.0827586	0.0482759	0.0206897	0.0482759	0.0206897	0.0413793	0.0137931	0.0896552	0.0206897	0.00689655	0.0482759	0.00689655	0.0896552	0.062069	0.0758621	0.103448	0	0.0137931	0.155251	0.376712	0.1621	0.305936	0.682648	0.538813	0.1212	0.5833	0.1102	0.3214	0.277
Rv0662c	0	7.82004	1.36109	4.33299	4.5186	3.93217	5.10205	1.16987	6.72421	5.85794	-1.3094	0.0402685	0.167832	1.19326	1.16956	vapB7	255	0	0.130952	0.0119048	0.0595238	0.0833333	0	0.0595238	0.0238095	0.0357143	0.0238095	0.119048	0.0357143	0	0.047619	0.0238095	0.190476	0.047619	0.0238095	0.0833333	0	0	0.145098	0.368627	0.133333	0.352941	0.721569	0.501961	0.1	0.6	0.0685	0.3857	0.22
Rv0663	3.34928	9.07574	0.6452	7.16066	7.20091	6.77205	7.61262	0.840577	6.79148	6.67704	-0.994067	0	-0.280657	0.925858	0.721069	atsD	2364	1	0.101652	0.0101652	0.0622618	0.0584498	0.0381194	0.105464	0.0368488	0.0419314	0.0317662	0.0775095	0.021601	0.0381194	0.0660737	0.0368488	0.0457433	0.0406607	0.0622618	0.0622618	0.0228717	0.0393901	0.193739	0.316836	0.163706	0.325719	0.642555	0.480541	0.1212	0.5475	0.0817	0.4963	0.315
Rv0664	1.118	8.72461	0.883648	5.85548	5.90098	5.35424	6.39475	1.04051	6.78385	5.06231	-0.340219	0	-0.126775	1.01042	0.874951	vapB8	273	1	0.155556	0.0333333	0.0777778	0.0333333	0	0.166667	0.0777778	0	0.0444444	0.0888889	0.0111111	0.0111111	0.0333333	0.0111111	0.111111	0.0777778	0.0333333	0.0222222	0	0.0111111	0.175824	0.311355	0.168498	0.344322	0.655678	0.479853	0.2716	0.3704	0.2	0.3286	0.233
Rv0665	0	8.81993	1.15665	4.97945	5.13651	4.3712	5.76975	1.39855	6.76271	5.74604	-1.10927	0.00671141	0.0414745	1.11517	1.0432	vapC8	339	1	0.169643	0.00892857	0.0625	0.0625	0.00892857	0.0803571	0	0.0625	0.0178571	0.125	0.0267857	0.00892857	0.0178571	0.0178571	0.0892857	0.0714286	0.0714286	0.0982143	0	0	0.162242	0.292035	0.188791	0.356932	0.648968	0.480826	0.1818	0.3737	0.13	0.4516	0.205
Rv0666	0	7.97011	1.34894	4.93228	5.17021	4.18457	5.89537	1.7108	6.74786	5.00638	-1.00597	0.0178971	0.227848	1.1211	1.22957	Rv0666	174	1	0.140351	0.0526316	0.0701754	0.0175439	0.0175439	0.0877193	0	0	0.0175439	0.0701754	0.0526316	0	0.0877193	0	0.105263	0.0877193	0.0701754	0.122807	0	0	0.149425	0.241379	0.218391	0.390805	0.632184	0.45977	0.283	0.2642	0.1064	0.4468	0.193
Rv0667	7.43203	12.7202	0.805086	10.6833	10.6703	10.1588	11.2002	1.0414	6.79284	3.71074	-0.226981	0	-0.207522	1.01261	0.794205	rpoB	3519	1	0.0708191	0.00767918	0.0716724	0.0887372	0.0290102	0.0819113	0.0187713	0.0554608	0.0418089	0.0819113	0.0264505	0.0332765	0.0554608	0.0290102	0.0708191	0.0605802	0.0537543	0.0947099	0.00767918	0.0204778	0.191816	0.30719	0.16482	0.336175	0.643365	0.472009	0.1068	0.5613	0.0554	0.5257	0.333
Rv0668	6.7762	12.4953	0.994025	9.99816	10.1309	9.50515	10.6149	1.10974	6.79062	4.01746	-0.714233	0	0.00951283	0.984512	1.01124	rpoC	3951	1	0.0881459	0.00911854	0.0645897	0.0835866	0.0273556	0.0797872	0.0182371	0.0554711	0.0493921	0.0911854	0.0227964	0.0288754	0.0478723	0.0395137	0.0843465	0.0410334	0.0493921	0.0828267	0.00759878	0.0288754	0.188307	0.315616	0.15996	0.336117	0.651734	0.475576	0.1029	0.58	0.045	0.5283	0.347
Rv0669c	2.90665	8.32222	1.02776	6.30711	6.36341	5.61009	7.10037	1.49028	6.78198	2.74262	-0.380711	0	0.0582281	0.969536	1.05995	Rv0669c	1914	0	0.10989	0.00784929	0.0612245	0.0518053	0.0423862	0.10675	0.0266876	0.0423862	0.00784929	0.0722135	0.0204082	0.0282575	0.0627943	0.0298273	0.0957614	0.0470958	0.0706436	0.0706436	0.0125589	0.032967	0.175026	0.331243	0.172936	0.320794	0.652038	0.50418	0.1574	0.517	0.1166	0.3939	0.26
Rv0670	3.18173	11.4928	0.881084	8.29762	8.24307	7.95121	8.64006	0.688855	6.78978	9.55652	-0.794698	0	-0.0517584	0.932843	0.949968	end	759	1	0.162698	0.0198413	0.103175	0.0396825	0.0198413	0.0833333	0.031746	0.0714286	0.0357143	0.0753968	0.00793651	0.031746	0.0436508	0.0238095	0.0714286	0.0357143	0.0515873	0.0634921	0.015873	0.0119048	0.189723	0.334651	0.14888	0.326746	0.661397	0.483531	0.1351	0.5586	0.0938	0.431	0.351
Rv0671	5.1579	9.1466	0.625821	7.30133	7.33451	6.98705	7.67045	0.683403	6.79199	3.51161	-0.276237	0	-0.297795	0.923617	0.703931	lpqP	843	1	0.125	0.025	0.0607143	0.0214286	0.0428571	0.121429	0.0285714	0.0357143	0.0107143	0.0714286	0.0142857	0.0392857	0.0571429	0.0142857	0.075	0.0607143	0.0571429	0.0928571	0.0178571	0.0285714	0.15777	0.341637	0.181495	0.319098	0.660735	0.523132	0.1279	0.5814	0.0962	0.3434	0.224
Rv0672	5.43928	11.2785	0.718806	7.34272	7.26123	6.90312	7.68966	0.786539	6.79109	8.4144	1.44094	0	-0.204334	0.92314	0.797392	fadE8	1629	1	0.134686	0.0166052	0.0535055	0.0645756	0.0129151	0.0904059	0.0313653	0.0350554	0.0221402	0.103321	0.0313653	0.0295203	0.0535055	0.0276753	0.0701107	0.0461255	0.0608856	0.0682657	0.0166052	0.0313653	0.173112	0.330878	0.157766	0.338244	0.669122	0.488643	0.1167	0.5374	0.076	0.4652	0.312
Rv0673	3.70988	10.1798	0.789624	6.51985	6.48914	6.02024	6.97347	0.953236	6.78851	5.49368	0.74441	0	-0.16437	0.953994	0.837356	echA4	939	1	0.137821	0.00961538	0.0705128	0.0448718	0.0352564	0.099359	0.0320513	0.0448718	0.025641	0.0769231	0.025641	0.0224359	0.0512821	0.0352564	0.0737179	0.0384615	0.0576923	0.0833333	0.0128205	0.0224359	0.169329	0.323749	0.157614	0.349308	0.673056	0.481363	0.1086	0.5206	0.0708	0.5088	0.285
Rv0674	1.17007	8.81896	0.858595	6.13349	6.05191	5.59902	6.66956	1.07054	6.78526	7.83955	-0.527181	0	-0.125761	0.984356	0.875966	Rv0674	723	1	0.158333	0.00416667	0.0791667	0.0416667	0.0166667	0.0666667	0.0333333	0.0166667	0.0125	0.129167	0.0541667	0.00833333	0.0416667	0.0208333	0.1125	0.0333333	0.075	0.0583333	0.0291667	0.00833333	0.160443	0.320885	0.171508	0.347165	0.66805	0.492393	0.1386	0.4505	0.1196	0.4389	0.21
Rv0675	0	8.74737	0.905366	5.88092	5.85929	5.43476	6.36441	0.929645	6.78165	11.3488	-1.28068	0.00223714	-0.102601	1.00797	0.899125	echA5	792	1	0.18251	0.0190114	0.0494297	0.0532319	0.0304183	0.110266	0.0152091	0.0228137	0.0152091	0.102662	0.026616	0.0190114	0.0570342	0.0304183	0.0912548	0.0456274	0.0342205	0.0760456	0.0152091	0.00380228	0.138889	0.304293	0.164141	0.392677	0.69697	0.468434	0.1283	0.3982	0.1111	0.519	0.219
Rv0676c	5.18374	15.5084	1.3298	7.87907	7.75584	7.07624	8.47871	1.40247	6.78228	9.04394	1.55348	0	0.405403	0.924393	1.40713	mmpL5	2895	0	0.113071	0.00414938	0.0497925	0.0404564	0.0414938	0.0746888	0.0197095	0.0767635	0.0248963	0.0995851	0.0497925	0.0228216	0.0466805	0.0477178	0.0487552	0.0591286	0.0622407	0.0840249	0.0124481	0.0217842	0.181347	0.324698	0.183765	0.31019	0.634888	0.508463	0.0805	0.5698	0.0707	0.4941	0.294
Rv0677c	4.39689	16.3056	1.47014	8.86826	8.7889	7.92834	9.56306	1.63472	6.78241	6.334	0.987541	0	0.522004	0.948135	1.52373	mmpS5	429	0	0.0985915	0.0140845	0.0704225	0.0422535	0.0422535	0.0774648	0	0.0774648	0.0492958	0.084507	0.00704225	0.0211268	0.0633803	0.0211268	0.0422535	0.056338	0.0915493	0.0985915	0.0140845	0.028169	0.191142	0.328671	0.193473	0.286713	0.615385	0.522145	0.122	0.5691	0.1053	0.4078	0.336
Rv0678	5.32259	14.1437	1.4676	8.10104	7.95888	7.0153	8.87483	1.85953	6.77991	4.32562	0.919944	0	0.539816	0.927783	1.54154	Rv0678	498	1	0.115152	0.00606061	0.0727273	0.0848485	0.0363636	0.0909091	0	0.030303	0	0.115152	0.0484848	0.0242424	0.030303	0.0424242	0.127273	0.0666667	0.030303	0.0484848	0.00606061	0.0242424	0.172691	0.271084	0.174699	0.381526	0.65261	0.445783	0.1324	0.4265	0.1077	0.536	0.187
Rv0679c	3.81075	11.2302	0.893591	7.3331	7.41391	6.88093	7.94835	1.06742	6.788	4.67903	-0.62494	0	-0.029649	0.92324	0.972078	Rv0679c	498	0	0.151515	0.0181818	0.0606061	0.030303	0.0121212	0.0909091	0.00606061	0.0424242	0.030303	0.0787879	0.0121212	0.0666667	0.0484848	0.00606061	0.0363636	0.0545455	0.181818	0.0606061	0	0.0121212	0.210843	0.355422	0.144578	0.289157	0.644578	0.5	0.1307	0.5359	0.0889	0.3906	0.375
Rv0680c	4.36343	9.51153	0.79939	7.55868	7.62028	7.12597	8.13907	1.0131	6.78994	3.72456	-0.709414	0	-0.122964	0.922354	0.878762	Rv0680c	375	0	0.112903	0.016129	0.0564516	0.0322581	0.0241935	0.0967742	0.016129	0.0645161	0.016129	0.0645161	0.0241935	0.0725806	0.0322581	0.0241935	0.0483871	0.0322581	0.112903	0.112903	0.0322581	0.00806452	0.197333	0.322667	0.170667	0.309333	0.632	0.493333	0.0917	0.5963	0.1064	0.3837	0.327
Rv0681	3.56235	10.6229	0.574436	7.81071	7.89871	7.58659	8.10806	0.521469	6.79282	17.7489	-1.92398	0	-0.349368	0.923804	0.652358	Rv0681	591	1	0.137755	0	0.0816327	0.0459184	0.0306122	0.0918367	0.0306122	0.0408163	0.0102041	0.102041	0.0408163	0.0153061	0.0306122	0.0102041	0.0867347	0.0561224	0.0765306	0.0663265	0.0102041	0.0357143	0.165821	0.302876	0.181049	0.350254	0.65313	0.483926	0.1494	0.454	0.0671	0.5106	0.282
Rv0682	6.84152	13.0148	1.01602	10.2721	10.3628	9.68979	11.0367	1.3469	6.79071	3.0994	-0.495335	0	0.0206742	0.995345	1.0224	rpsL	375	1	0.0564516	0.00806452	0.0241935	0.0322581	0	0.0967742	0.016129	0.0403226	0.129032	0.0645161	0.016129	0.0241935	0.0483871	0.0564516	0.120968	0.0564516	0.0725806	0.104839	0	0.0322581	0.221333	0.285333	0.152	0.341333	0.626667	0.437333	0.2	0.4737	0.0367	0.5192	0.355
Rv0683	7.69129	12.9486	0.835411	10.1763	10.2876	9.54559	10.7423	1.19667	6.7923	2.88805	-0.27495	0	-0.156079	0.99149	0.845647	rpsG	471	1	0.0961538	0	0.0448718	0.0576923	0.00641026	0.0641026	0.0128205	0.025641	0.0769231	0.102564	0.0192308	0.0384615	0.0576923	0.0320513	0.121795	0.0448718	0.0576923	0.0961538	0.0128205	0.0320513	0.195329	0.307856	0.169851	0.326964	0.63482	0.477707	0.184	0.48	0.0692	0.4683	0.22
Rv0684	7.21884	11.8798	0.778301	10.2767	10.39	9.87404	10.838	0.963924	6.79278	3.55434	-0.753271	0	-0.21723	0.995531	0.784496	fusA1	2106	1	0.0884451	0.00285307	0.0627675	0.0912981	0.0328103	0.0798859	0.0185449	0.0584879	0.0656205	0.0699001	0.0271041	0.0285307	0.0442225	0.0399429	0.042796	0.0456491	0.0670471	0.0941512	0.00570613	0.0342368	0.217949	0.298196	0.158594	0.325261	0.623457	0.45679	0.1054	0.5896	0.0633	0.5234	0.369
Rv0685	6.97768	13.7512	0.965546	11.0682	11.2711	10.5964	11.7364	1.13993	6.79178	4.12226	-0.911559	0	-0.0639922	1.02954	0.937734	tuf	1191	1	0.0782828	0	0.0681818	0.0833333	0.0328283	0.0833333	0.0277778	0.0555556	0.0530303	0.0656566	0.0277778	0.0353535	0.0505051	0.0353535	0.0606061	0.0151515	0.0909091	0.116162	0.00252525	0.0176768	0.207389	0.324097	0.151134	0.31738	0.641478	0.475231	0.1009	0.6309	0.0511	0.4708	0.402
Rv0686	5.69592	10.3298	0.697303	8.15268	8.1117	7.70714	8.59579	0.888655	6.79205	3.63868	0.127574	0	-0.231673	0.928976	0.770053	Rv0686	798	1	0.124528	0.00377358	0.0301887	0.0528302	0.0188679	0.0679245	0.00754717	0.0641509	0.0301887	0.135849	0.0226415	0.0415094	0.0415094	0.0528302	0.0603774	0.0566038	0.0603774	0.0943396	0.00754717	0.0264151	0.205514	0.293233	0.184211	0.317043	0.610276	0.477444	0.1126	0.4414	0.1518	0.4879	0.245
Rv0687	4.49106	9.97665	0.846664	6.62594	6.4755	6.09429	7.0746	0.98031	6.7878	4.677	0.965675	0	-0.100694	0.947359	0.901032	Rv0687	828	1	0.12	0.00363636	0.0545455	0.0581818	0.0218182	0.112727	0.0254545	0.0509091	0.0254545	0.08	0.0218182	0.0254545	0.0545455	0.0218182	0.0618182	0.0618182	0.0581818	0.105455	0.0181818	0.0181818	0.176329	0.291063	0.182367	0.350242	0.641304	0.47343	0.1483	0.4492	0.125	0.4571	0.214
Rv0688	3.47477	9.00631	0.676653	6.95355	6.86497	6.56098	7.36349	0.802509	6.79087	6.15404	-0.344313	0	-0.254721	0.931374	0.747005	Rv0688	1221	1	0.103448	0.00738916	0.0812808	0.0615764	0.0147783	0.110837	0.0246305	0.0344828	0.0270936	0.08867	0.0147783	0.0123153	0.046798	0.0270936	0.0665025	0.046798	0.0492611	0.150246	0.0123153	0.0197044	0.165438	0.280098	0.185913	0.36855	0.648649	0.466011	0.1868	0.4483	0.097	0.4494	0.264
Rv0690c	3.96781	9.09447	0.808455	7.28169	7.36364	6.75304	7.83437	1.08134	6.78939	3.60916	-0.485	0	-0.115422	0.923877	0.886304	Rv0690c	1050	0	0.126074	0.0114613	0.0601719	0.0487106	0.0114613	0.0888252	0.0372493	0.0487106	0.00573066	0.114613	0.0143266	0.0143266	0.0744986	0.0401146	0.0888252	0.0458453	0.0544413	0.0601719	0.0286533	0.025788	0.166667	0.347619	0.160952	0.324762	0.672381	0.508571	0.1026	0.5166	0.1398	0.416	0.239
Rv0691c	5.06904	9.7837	0.846515	7.33429	7.42002	6.75409	8.00335	1.24926	6.78895	2.49906	-0.259053	0	-0.0767128	0.923227	0.925014	Rv0691c	597	0	0.126263	0	0.0656566	0.0454545	0.0454545	0.0606061	0.0353535	0.0505051	0.020202	0.0959596	0.030303	0.020202	0.0252525	0.0353535	0.10101	0.0656566	0.0707071	0.0606061	0.020202	0.0252525	0.20268	0.324958	0.19263	0.279732	0.60469	0.517588	0.1548	0.5417	0.1733	0.3214	0.245
Rv0692	3.71408	13.0881	1.45813	8.68472	8.6328	7.7996	9.73373	1.93413	6.78122	2.93271	-0.236849	0	0.514326	0.943802	1.51605	Rv0692	330	1	0.110092	0.0183486	0.0825688	0.0183486	0.0366972	0.0642202	0.0275229	0.0183486	0.0183486	0.119266	0.0183486	0.0183486	0.0825688	0.0458716	0.0917431	0.0550459	0.0550459	0.0733945	0.0183486	0.0275229	0.154545	0.327273	0.206061	0.312121	0.639394	0.533333	0.2165	0.4021	0.1084	0.4568	0.259
Rv0693	2.544	12.0838	1.41538	8.24063	8.26911	7.24792	9.253	2.00507	6.78054	3.08445	-0.19575	0	0.484126	0.93125	1.48585	Rv0693	1176	1	0.0946292	0.0358056	0.0639386	0.0460358	0.0383632	0.0920716	0.028133	0.0332481	0.0230179	0.0920716	0.0153453	0.028133	0.0639386	0.0332481	0.0792839	0.0639386	0.0537084	0.0818414	0.0127877	0.0204604	0.173469	0.336735	0.166667	0.323129	0.659864	0.503401	0.0794	0.5471	0.1351	0.4488	0.268
Rv0694	2.80784	11.0998	1.34516	7.8874	7.90521	7.03186	8.91685	1.88499	6.78056	2.97194	-0.431735	0	0.420697	0.924466	1.42242	Rv0694	1191	1	0.131313	0	0.0555556	0.0479798	0.030303	0.106061	0.0126263	0.0505051	0.0328283	0.0782828	0.0227273	0.0227273	0.0656566	0.0252525	0.0757576	0.0606061	0.0454545	0.0984848	0.0277778	0.010101	0.169605	0.306465	0.177162	0.346767	0.653233	0.483627	0.1373	0.4776	0.1292	0.423	0.217
Rv0695	4.62725	10.095	1.0081	7.62349	7.6304	6.9971	8.27628	1.27918	6.78686	2.90235	-0.0984475	0	0.085541	0.922554	1.08727	Rv0695	756	1	0.12749	0.0199203	0.0398406	0.0517928	0.0119522	0.103586	0.0358566	0.0318725	0	0.0916335	0.0278884	0.0159363	0.0717131	0.0199203	0.0916335	0.063745	0.0836653	0.0796813	0.0199203	0.0119522	0.153439	0.333333	0.15873	0.354497	0.687831	0.492063	0.1126	0.4505	0.1214	0.4545	0.206
Rv0696	2.68297	9.2567	1.20102	6.59701	6.63656	5.88104	7.36446	1.48342	6.77859	2.93167	-0.249402	0	0.251919	0.9491	1.25365	Rv0696	1413	1	0.129787	0.0212766	0.0680851	0.0361702	0.0170213	0.0808511	0.0297872	0.0446809	0.012766	0.125532	0.0106383	0.0106383	0.0553191	0.0106383	0.106383	0.0595745	0.0446809	0.102128	0.0170213	0.0170213	0.13942	0.317764	0.196745	0.346072	0.663836	0.514508	0.1515	0.4312	0.1079	0.4624	0.241
Rv0697	0	7.81223	1.32303	4.66061	4.52314	3.68649	5.50655	1.82006	6.75328	3.00899	0.149713	0.00447427	0.169266	1.15376	1.17099	Rv0697	1440	1	0.114823	0.0146138	0.0563674	0.0438413	0.0187891	0.112735	0.0313152	0.0480167	0.00208768	0.0876827	0.0292276	0.0167015	0.0709812	0.0167015	0.0793319	0.0688935	0.0563674	0.104384	0.0167015	0.0104384	0.164583	0.292361	0.199306	0.34375	0.636111	0.491667	0.2126	0.3879	0.155	0.3874	0.247
Rv0698	1.03444	8.04105	0.925563	5.87663	6.0507	5.32041	6.57458	1.25417	6.78248	3.90325	-0.845921	0	-0.0828176	1.00838	0.918909	Rv0698	612	1	0.0788177	0.0295567	0.0591133	0.0344828	0.00985222	0.103448	0.0344828	0.0147783	0.0197044	0.0689655	0.00492611	0.044335	0.08867	0.044335	0.142857	0.0295567	0.0837438	0.0837438	0.00985222	0.0147783	0.20098	0.320261	0.155229	0.323529	0.643791	0.47549	0.1878	0.4033	0.1914	0.3962	0.198
Rv0699	0	8.54399	1.74542	3.9911	4.18516	2.9604	5.12201	2.16161	6.67026	3.16096	-0.391949	0.0592841	0.51073	1.23469	1.51246	Rv0699	222	1	0.191781	0.0410959	0.0684932	0.0136986	0	0.109589	0	0.0410959	0.0136986	0.0684932	0.0273973	0.0273973	0.0136986	0.0136986	0.123288	0.136986	0.0136986	0.0821918	0.0136986	0	0.130631	0.261261	0.198198	0.40991	0.671171	0.459459	0.2388	0.3284	0.0667	0.4912	0.199
Rv0700	8.1461	15.2576	1.02617	11.7576	11.8333	11.2012	12.3691	1.16792	6.79183	4.37871	-0.42453	0	-0.0345496	1.06072	0.967177	rpsJ	306	1	0.0792079	0.00990099	0.0792079	0.049505	0.00990099	0.029703	0.039604	0.0990099	0.0792079	0.049505	0.029703	0.019802	0.0693069	0.019802	0.0891089	0.049505	0.0594059	0.108911	0	0.029703	0.228758	0.316993	0.163399	0.29085	0.607843	0.480392	0.119	0.5714	0.075	0.5	0.276
Rv0701	6.8285	14.2215	1.07774	10.9357	11.0482	10.4157	11.6311	1.21545	6.79071	4.51133	-0.664335	0	0.0540944	1.02365	1.05582	rplC	654	1	0.0967742	0.00460829	0.0414747	0.0414747	0.0230415	0.138249	0.0184332	0.0322581	0.0599078	0.0645161	0.0276498	0.0322581	0.0414747	0.0322581	0.0921659	0.0414747	0.0737327	0.110599	0	0.0276498	0.200306	0.293578	0.159021	0.347095	0.640673	0.452599	0.1648	0.5055	0.1061	0.407	0.294
Rv0702	6.14408	13.591	1.18177	10.2678	10.3742	9.68448	11.0911	1.40659	6.78885	3.9482	-0.691361	0	0.186605	0.995169	1.18833	rplD	672	1	0.139013	0	0.044843	0.0493274	0.0179372	0.0896861	0.0224215	0.0403587	0.058296	0.0672646	0.0134529	0.0313901	0.0493274	0.0538117	0.0852018	0.058296	0.0762332	0.0852018	0	0.0179372	0.199405	0.325893	0.126488	0.348214	0.674107	0.452381	0.1087	0.5054	0.0737	0.5138	0.327
Rv0703	6.34996	14.034	1.20204	10.7207	10.7848	10.0122	11.5677	1.55551	6.78927	3.67438	-0.457058	0	0.187813	1.01422	1.18954	rplW	303	1	0.11	0	0.06	0.02	0.03	0.06	0	0.08	0.1	0.07	0.01	0.04	0.06	0.02	0.09	0.06	0.08	0.08	0	0.03	0.221122	0.316832	0.158416	0.30363	0.620462	0.475248	0.0941	0.5412	0.0602	0.5333	0.295
Rv0704	5.98327	13.1691	1.15304	10.5345	10.6169	9.99255	11.3102	1.31761	6.78949	4.18764	-0.779449	0	0.1468	1.00624	1.14853	rplB	843	1	0.0857143	0.00357143	0.0357143	0.0428571	0.0107143	0.132143	0.0392857	0.0535714	0.0714286	0.05	0.0178571	0.0571429	0.0607143	0.0107143	0.128571	0.0642857	0.0428571	0.0607143	0.0107143	0.0214286	0.200474	0.320285	0.14828	0.330961	0.651246	0.468565	0.1772	0.5359	0.0711	0.4143	0.286
Rv0705	5.72633	13.6155	1.18266	10.7326	10.8589	10.1812	11.4896	1.30842	6.78937	4.48005	-0.939075	0	0.16792	1.01474	1.16965	rpsS	282	1	0.0215054	0	0.0645161	0.0430108	0.0645161	0.0645161	0.0645161	0.0537634	0.139785	0.0430108	0.0215054	0.0215054	0.0537634	0.0215054	0.0860215	0.0537634	0.0752688	0.0967742	0.0107527	0	0.255319	0.301418	0.163121	0.280142	0.58156	0.464539	0.1268	0.6056	0.1	0.4769	0.308
Rv0706	3.24629	12.495	1.3244	9.09947	9.32117	8.37593	9.96207	1.58613	6.7845	4.01238	-0.840874	0	0.370138	0.954262	1.37186	rplV	594	1	0.238579	0	0.035533	0.0203046	0.0101523	0.0507614	0.00507614	0.0304569	0.111675	0.0253807	0.00507614	0.0152284	0.071066	0.0253807	0.106599	0.0913706	0.0609137	0.0812183	0.00507614	0.0101523	0.200337	0.340067	0.114478	0.345118	0.685185	0.454545	0.122	0.4573	0.1167	0.454	0.231
Rv0707	5.27533	12.892	1.11401	9.55458	9.70917	9.0077	10.2854	1.27774	6.7886	4.17615	-0.919829	0	0.145581	0.968432	1.14731	rpsC	825	1	0.127737	0.00364964	0.0510949	0.0729927	0.0145985	0.105839	0.0109489	0.0583942	0.0474453	0.0547445	0.0145985	0.0182482	0.040146	0.0437956	0.127737	0.0510949	0.0547445	0.0656934	0.0109489	0.0255474	0.185455	0.311515	0.140606	0.362424	0.673939	0.452121	0.139	0.5202	0.0855	0.4633	0.288
Rv0708	4.96628	12.8964	1.17948	9.38029	9.54306	8.8631	10.1723	1.30919	6.7874	4.19457	-0.907294	0	0.216782	0.962698	1.21851	rplP	417	1	0.0869565	0	0.0144928	0.057971	0.0289855	0.0869565	0.0434783	0.0942029	0.0797101	0.0507246	0.0144928	0.0434783	0.0652174	0.0362319	0.108696	0.0362319	0.0507246	0.057971	0.0217391	0.0217391	0.218225	0.323741	0.167866	0.290168	0.613909	0.491607	0.1927	0.578	0.0714	0.4141	0.31
Rv0709	4.75925	13.004	1.28415	9.88348	10.1932	9.27523	10.758	1.48278	6.78674	4.2025	-1.11074	0	0.303979	0.980168	1.30571	rpmC	234	1	0.0649351	0	0.025974	0.155844	0.025974	0.0779221	0	0.025974	0.025974	0.142857	0.025974	0.0519481	0.025974	0.038961	0.142857	0.038961	0.0649351	0.0519481	0	0.012987	0.205128	0.273504	0.175214	0.346154	0.619658	0.448718	0.1724	0.431	0.1212	0.5	0.304
Rv0710	5.12931	13.2458	1.26491	10.0975	10.3717	9.65556	10.8921	1.23652	6.78739	4.61609	-1.10492	0	0.276544	0.988368	1.27827	rpsQ	411	1	0.161765	0	0.0441176	0.0588235	0	0.0588235	0.0220588	0.0514706	0.139706	0.0441176	0.0367647	0.0220588	0.0661765	0.00735294	0.0955882	0.0294118	0.0661765	0.0735294	0.00735294	0.0147059	0.245742	0.296837	0.124088	0.333333	0.63017	0.420925	0.165	0.4757	0.1026	0.4818	0.279
Rv0711	5.22949	10.4604	0.984593	7.51796	7.43742	6.78536	8.14093	1.35557	6.78726	2.95186	0.491973	0	0.062277	0.922316	1.064	atsA	2364	1	0.0914867	0.0101652	0.064803	0.0622618	0.047014	0.100381	0.0343075	0.0457433	0.0266836	0.0787802	0.0165184	0.0381194	0.068615	0.0165184	0.0482846	0.0546379	0.068615	0.064803	0.021601	0.0406607	0.197547	0.327834	0.172166	0.302453	0.630288	0.5	0.1187	0.5653	0.1241	0.4198	0.313
Rv0712	4.08687	9.03474	0.740162	6.71924	6.71373	6.20695	7.2066	0.999658	6.7896	3.32548	0.00131992	0	-0.201914	0.942076	0.799812	Rv0712	900	1	0.123746	0.0267559	0.0602007	0.0434783	0.0401338	0.09699	0.0301003	0.0200669	0.0100334	0.0501672	0.0200669	0.0167224	0.0936455	0.0301003	0.0702341	0.0367893	0.0802676	0.0735786	0.0401338	0.0367893	0.163333	0.335556	0.166667	0.334444	0.67	0.502222	0.1284	0.4903	0.1461	0.4272	0.279
Rv0713	3.93078	9.82033	0.916718	7.17404	7.18588	6.7142	7.72389	1.00969	6.78728	4.0058	-0.467146	0	-0.0088835	0.925602	0.992843	Rv0713	942	1	0.0958466	0.00638978	0.0734824	0.0319489	0.0255591	0.0766773	0.0223642	0.057508	0.0223642	0.108626	0.0191693	0.0159744	0.0766773	0.0319489	0.0511182	0.0479233	0.0734824	0.111821	0.0223642	0.028754	0.184713	0.309979	0.196391	0.308917	0.618896	0.506369	0.1392	0.4505	0.1463	0.4518	0.279
Rv0714	6.34173	14.2067	1.12903	10.0374	10.1413	9.40903	10.6791	1.27005	6.78928	5.07799	-0.173281	0	0.143002	0.986026	1.14473	rplN	369	1	0.0737705	0.00819672	0.0655738	0.057377	0.0245902	0.0983607	0	0.0983607	0.0819672	0.0491803	0.0163934	0.0327869	0.0491803	0.0163934	0.114754	0.0409836	0.0327869	0.122951	0	0.0163934	0.195122	0.289973	0.170732	0.344173	0.634146	0.460705	0.1176	0.5686	0.0583	0.4945	0.24
Rv0715	5.7527	13.9055	1.13829	9.9393	10.0444	9.38404	10.6782	1.29418	6.78892	4.87529	-0.61022	0	0.156026	0.982267	1.15775	rplX	318	1	0.047619	0	0.0666667	0.0380952	0	0.114286	0.0285714	0.0761905	0.114286	0.0285714	0.0190476	0.0380952	0.0285714	0.0285714	0.0952381	0.0571429	0.0666667	0.133333	0	0.0190476	0.238994	0.283019	0.154088	0.323899	0.606918	0.437107	0.131	0.5833	0.0805	0.4557	0.3
Rv0716	5.31303	12.933	1.12441	9.74853	9.86948	9.33629	10.4275	1.09117	6.7887	5.33778	-1.05482	0	0.149196	0.975216	1.15092	rplE	564	1	0.0855615	0	0.0695187	0.0534759	0.0481283	0.0855615	0.00534759	0.0481283	0.0588235	0.0802139	0.0320856	0.0374332	0.0374332	0.0427807	0.112299	0.026738	0.0534759	0.101604	0.00534759	0.0160428	0.193262	0.296099	0.175532	0.335106	0.631206	0.471631	0.1258	0.543	0.0748	0.4928	0.275
Rv0717	5.12829	13.9761	1.34412	10.055	10.2428	9.35954	10.8301	1.47059	6.78632	4.52408	-0.794057	0	0.35741	0.986708	1.35914	rpsN1	186	1	0.147541	0.0655738	0	0.0327869	0.0327869	0.0819672	0.0163934	0.0163934	0.114754	0.0655738	0.0327869	0.0163934	0.0491803	0.0163934	0.131148	0.0491803	0.0163934	0.0655738	0.0163934	0.0327869	0.193548	0.284946	0.155914	0.365591	0.650538	0.44086	0.1042	0.5417	0.0625	0.5106	0.323
Rv0718	4.5816	13.7152	1.21122	10.4249	10.6112	9.83761	11.1943	1.35674	6.78856	5.57485	-1.12713	0	0.209588	1.00164	1.21131	rpsH	399	1	0.0909091	0	0.0454545	0.0378788	0.0151515	0.0909091	0.0151515	0.0606061	0.0530303	0.113636	0.0151515	0.0378788	0.0378788	0.030303	0.0909091	0.0909091	0.0530303	0.0757576	0.00757576	0.0378788	0.192982	0.310777	0.175439	0.320802	0.631579	0.486216	0.115	0.5133	0.0734	0.495	0.261
Rv0719	6.49936	12.6903	1.05123	10.057	10.1191	9.52273	10.7558	1.2331	6.79008	3.85296	-0.648533	0	0.0644444	0.986785	1.06617	rplF	540	1	0.0558659	0	0.0391061	0.0502793	0.0223464	0.122905	0.0111732	0.0726257	0.0782123	0.0558659	0.0111732	0.027933	0.0614525	0.0446927	0.0837989	0.0502793	0.0726257	0.111732	0	0.027933	0.212963	0.296296	0.17037	0.32037	0.616667	0.466667	0.1712	0.5068	0.0974	0.4468	0.276
Rv0720	0.797992	13.2084	1.35324	9.10338	9.19201	8.57817	9.91148	1.33331	6.7832	8.82513	-1.45709	0	0.398873	0.954372	1.4006	rplR	369	1	0.147541	0	0.0491803	0.0327869	0.0163934	0.0901639	0.0327869	0.0491803	0.0409836	0.0737705	0.00819672	0.0245902	0.0163934	0.0245902	0.147541	0.0737705	0.057377	0.0983607	0	0.0163934	0.173442	0.336043	0.143631	0.346883	0.682927	0.479675	0.0826	0.5138	0.1154	0.449	0.22
Rv0721	4.11989	12.0404	1.14313	9.66065	9.89447	9.10492	10.4346	1.32967	6.78826	5.31975	-1.22182	0	0.171039	0.972092	1.17277	rpsE	663	1	0.15	0.00454545	0.0454545	0.0636364	0.0181818	0.127273	0.0136364	0.0454545	0.05	0.0681818	0.0136364	0.0272727	0.0454545	0.0181818	0.104545	0.05	0.0363636	0.109091	0	0.00909091	0.174962	0.288084	0.147813	0.38914	0.677225	0.435897	0.1436	0.4734	0.089	0.4641	0.281
Rv0722	3.18096	12.2097	1.29592	9.04063	9.15043	8.37412	9.93088	1.55676	6.78492	3.9841	-0.701427	0	0.343294	0.952629	1.34502	rpmD	198	1	0.0769231	0	0.0153846	0.0615385	0	0.0769231	0.0307692	0.0769231	0.0461538	0.0923077	0.0153846	0.0153846	0.0153846	0.0615385	0.153846	0.0615385	0.0923077	0.0923077	0.0153846	0	0.227273	0.282828	0.151515	0.338384	0.621212	0.434343	0.1346	0.4038	0.1695	0.463	0.276
Rv0723	5.16677	12.0692	1.08723	10.1847	10.4639	9.8491	10.8855	1.03639	6.78964	5.34538	-1.50911	0	0.0954007	0.991825	1.09713	rplO	441	1	0.10274	0	0.0479452	0.0273973	0.0342466	0.143836	0.0205479	0.0342466	0.10274	0.0753425	0.0205479	0.0273973	0.0342466	0.0205479	0.10274	0.0410959	0.0684932	0.0890411	0	0.00684932	0.188209	0.319728	0.14059	0.351474	0.671202	0.460317	0.1066	0.5902	0.0484	0.4454	0.299
Rv0724	6.437	11.7072	0.708093	9.22917	9.13895	8.81472	9.56885	0.75413	6.79279	4.59789	0.441033	0	-0.249937	0.95803	0.75179	sppA	1872	1	0.136437	0.00642055	0.0658106	0.0497592	0.0272873	0.0963082	0.00963082	0.0369181	0.0192616	0.0834671	0.0192616	0.0160514	0.0642055	0.0224719	0.0866774	0.0738363	0.0497592	0.102729	0.0160514	0.0176565	0.14797	0.315171	0.182158	0.354701	0.669872	0.497329	0.1673	0.4412	0.0977	0.4499	0.232
Rv0725c	2.0615	8.11261	1.03238	6.0201	6.0487	5.38122	6.78384	1.40262	6.78041	2.93505	-0.412623	0	0.0376384	0.994737	1.03936	Rv0725c	906	0	0.156146	0.0166113	0.0631229	0.0166113	0.0265781	0.0697674	0.00664452	0.0531561	0.0232558	0.076412	0.0166113	0.0199336	0.0730897	0.0232558	0.0797342	0.0631229	0.106312	0.0531561	0.0299003	0.0265781	0.186534	0.317881	0.173289	0.322296	0.640177	0.49117	0.1082	0.3993	0.1799	0.4843	0.236
Rv0726c	4.41438	9.99688	0.709658	7.20682	7.13294	6.77045	7.56328	0.792828	6.79088	4.46921	0.330529	0	-0.215359	0.925017	0.786368	Rv0726c	1104	0	0.133515	0.00544959	0.0708447	0.0599455	0.0408719	0.0463215	0.0217984	0.0245232	0.0190736	0.0844687	0.0299728	0.0299728	0.0708447	0.0326975	0.0871935	0.0572207	0.0817439	0.0572207	0.0190736	0.027248	0.200181	0.326087	0.173007	0.300725	0.626812	0.499094	0.1526	0.4805	0.1516	0.4179	0.261
Rv0727c	0	7.55035	1.46287	4.11238	3.80743	3.07283	5.24872	2.1759	6.72853	2.72147	0.301778	0.0111857	0.242895	1.21997	1.24462	fucA	657	0	0.146789	0.0229358	0.059633	0.0504587	0.0229358	0.0917431	0.0321101	0.0458716	0.00917431	0.087156	0.0183486	0.0366972	0.059633	0.00917431	0.0733945	0.0458716	0.0412844	0.110092	0.00917431	0.0275229	0.150685	0.348554	0.171994	0.328767	0.677321	0.520548	0.1168	0.5685	0.0774	0.4051	0.291
Rv0728c	0	8.01225	0.950045	3.96237	4.04736	3.33316	4.51779	1.18462	6.7652	5.2629	0.0894702	0.00111857	-0.288135	1.23818	0.713591	serA2	981	0	0.153374	0	0.0828221	0.0306748	0.0214724	0.095092	0.0276074	0.0429448	0.00306748	0.107362	0.0214724	0.0245399	0.0613497	0.0245399	0.0889571	0.0368098	0.0552147	0.0981595	0.0122699	0.0122699	0.140673	0.355759	0.163099	0.340469	0.696228	0.518858	0.1246	0.5387	0.0613	0.417	0.253
Rv0729	0	8.29508	1.04529	4.82621	4.82345	4.2202	5.39573	1.17553	6.77021	5.30914	-0.0979215	0.00223714	-0.0886065	1.13389	0.91312	xylB	1347	1	0.171875	0.00892857	0.0714286	0.0357143	0.0178571	0.107143	0.00892857	0.0424107	0.00892857	0.078125	0.00892857	0.0133929	0.0647321	0.0245536	0.0870536	0.046875	0.0602679	0.102679	0.0245536	0.015625	0.139569	0.321455	0.157387	0.381589	0.703044	0.478842	0.1067	0.4417	0.1099	0.4859	0.221
Rv0730	5.76985	9.474	0.551538	8.02699	8.02572	7.7873	8.30253	0.515237	6.79329	5.61011	-0.77699	0	-0.374767	0.926305	0.62696	Rv0730	729	1	0.177686	0	0.0785124	0.0785124	0.0330579	0.0785124	0.0289256	0.0371901	0.0371901	0.0578512	0.0330579	0.0123967	0.0413223	0.0289256	0.0785124	0.0578512	0.0371901	0.0785124	0.0123967	0.0123967	0.1893	0.315501	0.156379	0.33882	0.654321	0.471879	0.148	0.5408	0.1361	0.3846	0.259
Rv0731c	0	7.94619	1.08584	5.3434	5.40481	4.68312	6.1067	1.42358	6.77338	3.70235	-0.523275	0.00111857	0.0189261	1.06691	1.02065	Rv0731c	957	0	0.141509	0	0.0974843	0.0534591	0.0471698	0.0786164	0.0157233	0.0314465	0.0125786	0.100629	0.0188679	0.0188679	0.0345912	0.0408805	0.0974843	0.0440252	0.072327	0.0597484	0.0157233	0.0188679	0.174504	0.341693	0.15465	0.329154	0.670846	0.496343	0.0989	0.5678	0.1107	0.4188	0.294
Rv0732	4.06965	11.2795	1.08001	8.73095	8.87333	8.25908	9.40698	1.1479	6.78752	6.09997	-1.23511	0	0.135137	0.944876	1.13686	secY	1326	1	0.0793651	0.00680272	0.0204082	0.031746	0.0498866	0.111111	0.00226757	0.108844	0.0272109	0.113379	0.0272109	0.0272109	0.0408163	0.047619	0.0498866	0.0612245	0.0521542	0.0952381	0.00680272	0.0408163	0.180995	0.300151	0.222474	0.29638	0.596531	0.522624	0.1263	0.5474	0.0884	0.4427	0.312
Rv0733	4.74917	10.623	1.00295	8.77703	9.0094	8.31651	9.56515	1.24864	6.78881	4.39548	-1.19756	0	0.0570159	0.945937	1.05874	adk	546	1	0.0883978	0	0.0939227	0.0883978	0.0220994	0.0883978	0.00552486	0.0331492	0.0552486	0.138122	0.0220994	0.0331492	0.038674	0.0220994	0.0939227	0.0220994	0.0497238	0.0773481	0	0.0276243	0.197802	0.291209	0.164835	0.346154	0.637363	0.456044	0.0878	0.5405	0.0897	0.518	0.243
Rv0734	2.52696	9.4861	0.993952	7.93153	8.10028	7.52799	8.64602	1.11802	6.78705	7.73608	-1.75987	0	0.0690542	0.924898	1.07078	mapA	801	1	0.165414	0.0075188	0.0601504	0.0488722	0.0150376	0.120301	0.0300752	0.0526316	0.0075188	0.0902256	0.0225564	0.0112782	0.0488722	0.0112782	0.0714286	0.0639098	0.0676692	0.0789474	0.0112782	0.0150376	0.148564	0.327091	0.167291	0.357054	0.684145	0.494382	0.1506	0.4644	0.0909	0.4369	0.291
Rv0735	1.93162	9.2957	0.845382	6.54055	6.63723	6.12213	7.06059	0.938459	6.7868	6.53705	-0.945199	0	-0.107263	0.952645	0.894464	sigL	534	1	0.180791	0	0.0564972	0.0621469	0.0112994	0.0508475	0.0225989	0.039548	0.00564972	0.107345	0.0169492	0.0169492	0.0225989	0.0508475	0.112994	0.0508475	0.0677966	0.0734463	0.0225989	0.0282486	0.170412	0.310861	0.164794	0.353933	0.664794	0.475655	0.1133	0.4267	0.1224	0.5143	0.199
Rv0736	1.64236	8.62868	0.794588	5.20858	5.12726	4.83595	5.42643	0.590471	6.78419	7.08827	0.742909	0	-0.290279	1.08487	0.711447	rslA	753	1	0.16	0.02	0.048	0.04	0.008	0.08	0.028	0.028	0	0.112	0.02	0.004	0.064	0.04	0.068	0.08	0.068	0.104	0.016	0.012	0.131474	0.324037	0.185923	0.358566	0.682603	0.50996	0.1538	0.3846	0.09	0.5049	0.263
Rv0737	0	7.94971	0.827658	4.87352	4.86099	4.53413	5.26212	0.727988	6.77891	10.1481	-0.848082	0.00223714	-0.30057	1.12823	0.701157	Rv0737	498	1	0.121212	0	0.0545455	0.0606061	0.030303	0.0606061	0.0242424	0.0363636	0.00606061	0.109091	0.0242424	0.030303	0.030303	0.030303	0.109091	0.0727273	0.0787879	0.10303	0.0121212	0.00606061	0.158635	0.317269	0.176707	0.34739	0.664659	0.493976	0.1181	0.4444	0.0882	0.5154	0.236
Rv0738	1.80732	11.2105	1.27703	6.3031	6.3021	5.56257	7.02765	1.46508	6.7746	4.03917	0.0279084	0	0.30717	0.969859	1.3089	Rv0738	549	1	0.181319	0.010989	0.0604396	0.0549451	0.0384615	0.0879121	0.0274725	0.0274725	0.0164835	0.0934066	0.0164835	0.0164835	0.0989011	0.0494505	0.0659341	0.021978	0.0494505	0.0659341	0.0164835	0	0.134791	0.371585	0.151184	0.342441	0.714026	0.522769	0.1161	0.5484	0.0604	0.4514	0.229
Rv0739	3.29701	8.90579	0.781868	5.33461	5.27392	4.85568	5.78559	0.929912	6.78503	3.65674	0.352993	0	-0.286195	1.06806	0.715532	Rv0739	807	1	0.149254	0.011194	0.0597015	0.0298507	0.0335821	0.0671642	0.0298507	0.0410448	0.0298507	0.0671642	0.011194	0.0223881	0.0708955	0.0447761	0.104478	0.0485075	0.0559701	0.0671642	0.0149254	0.0410448	0.189591	0.324659	0.169765	0.315985	0.640644	0.494424	0.1538	0.4274	0.1627	0.4646	0.243
Rv0740	3.67467	10.0528	0.813614	6.73836	6.7371	6.32899	7.15323	0.824241	6.78829	4.92476	-0.134684	0	-0.12744	0.941054	0.874287	Rv0740	528	1	0.0685714	0.0285714	0.0628571	0.0857143	0.0228571	0.0971429	0.00571429	0.04	0.0171429	0.0857143	0.0285714	0.0342857	0.0742857	0.0285714	0.0685714	0.0457143	0.0742857	0.0628571	0.0285714	0.04	0.200758	0.291667	0.164773	0.342803	0.63447	0.456439	0.1127	0.4859	0.1374	0.5	0.262
Rv0742	0	8.62164	0.932456	5.35739	5.35695	4.88478	5.83382	0.949037	6.77915	7.23242	-0.305634	0.00223714	-0.132626	1.06508	0.869101	Rv0742	528	1	0.308571	0	0.0228571	0.0114286	0.04	0.205714	0.0114286	0.0514286	0	0.08	0.00571429	0.0342857	0.04	0.0342857	0.00571429	0.0628571	0.0457143	0.0285714	0	0.0114286	0.107955	0.339015	0.138258	0.414773	0.753788	0.477273	0.0778	0.479	0.039	0.5278	0.255
Rv0743c	0	8.6356	0.883467	6.09868	6.13356	5.53036	6.77704	1.24668	6.78445	5.26874	-0.574883	0.00111857	-0.104028	0.987495	0.897698	Rv0743c	558	0	0.12973	0.00540541	0.0810811	0.0540541	0.027027	0.0702703	0.0324324	0.0486486	0.027027	0.102703	0.0108108	0.0324324	0.0486486	0.0378378	0.0756757	0.0648649	0.027027	0.0918919	0.0162162	0.0162162	0.184588	0.31362	0.188172	0.31362	0.62724	0.501792	0.1899	0.4684	0.1389	0.4148	0.327
Rv0744c	2.06791	9.36029	0.91019	6.49473	6.49358	5.92021	7.11038	1.19017	6.78547	5.24772	-0.430473	0	-0.0454796	0.95567	0.956247	Rv0744c	507	0	0.0714286	0.0119048	0.047619	0.0952381	0.0178571	0.047619	0.047619	0.0119048	0.0178571	0.0952381	0.047619	0.0238095	0.0357143	0.0238095	0.130952	0.0833333	0.0595238	0.0952381	0.0297619	0.00595238	0.179487	0.278107	0.171598	0.370809	0.648915	0.449704	0.1439	0.4242	0.0775	0.5512	0.197
Rv0745	0	8.10876	1.44609	2.15396	2.16959	1.10049	3.02037	1.91988	6.54731	4.89031	0.923236	0.0928412	-0.0130976	1.45919	0.988629	Rv0745	528	1	0.131429	0.0457143	0.0342857	0.0114286	0	0.0742857	0.04	0.0342857	0.00571429	0.0628571	0.0171429	0.0114286	0.102857	0.0514286	0.137143	0.0914286	0.0571429	0.0742857	0.0114286	0.00571429	0.13447	0.323864	0.179924	0.361742	0.685606	0.503788	0.1824	0.2642	0.1293	0.5745	0.163
Rv0746	0	8.63641	1.39992	4.17272	4.22335	3.37147	4.99424	1.62277	6.73019	4.20287	-0.173009	0.00671141	0.187264	1.21266	1.18899	PE_PGRS9	2352	1	0.180077	0	0.0268199	0.00893997	0.0204342	0.418902	0.0063857	0.0153257	0.00255428	0.0893997	0.00383142	0.0344828	0.0229885	0.0166028	0.00510856	0.0434227	0.0523627	0.0395913	0.0102171	0.00255428	0.0918367	0.302296	0.119048	0.48682	0.789116	0.421344	0.12	0.5307	0.0514	0.3599	0.245
Rv0747	0.179903	11.0425	1.49666	5.07062	4.85315	4.09651	5.82007	1.72355	6.7521	4.2436	0.638855	0	0.393335	1.10332	1.39506	PE_PGRS10	2406	1	0.181024	0	0.0187266	0.0062422	0.0299625	0.41573	0.00374532	0.0237203	0.0062422	0.0649189	0.00749064	0.0499376	0.0237203	0.0137328	0.0062422	0.0636704	0.0449438	0.0324594	0.00374532	0.00374532	0.103491	0.330424	0.108479	0.457606	0.78803	0.438903	0.0804	0.6446	0.0467	0.2907	0.258
Rv0748	0	10.0767	0.960995	6.90831	6.91065	6.49053	7.32988	0.839346	6.7851	8.38632	-0.798346	0.00111857	0.0279463	0.933049	1.02967	vapB31	258	1	0.129412	0	0.0588235	0.0823529	0.0235294	0.105882	0.0117647	0.0470588	0.0235294	0.0941176	0.0117647	0.0235294	0.0352941	0.0117647	0.141176	0.0705882	0.0588235	0.0705882	0	0	0.170543	0.344961	0.155039	0.329457	0.674419	0.5	0.1216	0.5541	0.1216	0.3571	0.243
Rv0749	2.25499	9.29409	0.972516	6.17708	6.16236	5.58373	6.87063	1.2869	6.78295	3.85655	-0.220596	0	-0.00798147	0.980497	0.993745	vapC31	429	1	0.147887	0.0140845	0.0774648	0.028169	0.0633803	0.028169	0.0633803	0.0352113	0.00704225	0.126761	0.0140845	0.0352113	0.0915493	0.00704225	0.0985915	0.0352113	0.0352113	0.0774648	0.0140845	0	0.172494	0.365967	0.18648	0.275058	0.641026	0.552448	0.1212	0.4697	0.2059	0.4021	0.212
Rv0750	0	10.2943	1.27934	6.78684	6.89966	6.24744	7.51897	1.27154	6.77577	5.53242	-0.83372	0.00223714	0.340788	0.93855	1.34251	Rv0750	246	1	0.0864198	0.0246914	0.0864198	0.037037	0.0123457	0.111111	0.0123457	0.0617284	0.0246914	0.111111	0.037037	0.0246914	0.0864198	0.037037	0.037037	0.0493827	0.0493827	0.0493827	0.0246914	0.037037	0.182927	0.317073	0.162602	0.337398	0.654472	0.479675	0.0725	0.5362	0.0984	0.5179	0.277
Rv0751c	2.0873	10.7366	1.00851	6.45494	6.3816	5.90701	6.91607	1.00906	6.78342	7.72287	0.488403	0	0.0500992	0.958408	1.05183	mmsB	885	0	0.207483	0.0170068	0.0544218	0.0306122	0.037415	0.0918367	0.0306122	0.037415	0.0238095	0.0782313	0.0340136	0.0306122	0.0544218	0.0170068	0.037415	0.0510204	0.0646259	0.0918367	0.00340136	0.00680272	0.157062	0.344633	0.154802	0.343503	0.688136	0.499435	0.0763	0.5267	0.0866	0.4773	0.308
Rv0752c	1.99874	11.9576	1.02204	6.29273	6.10404	5.77421	6.56006	0.785846	6.78337	11.6808	1.93254	0	0.0513408	0.970702	1.05307	fadE9	1173	0	0.153846	0.0153846	0.074359	0.0538462	0.0384615	0.117949	0.0179487	0.0410256	0.0282051	0.0871795	0.0333333	0.0128205	0.0282051	0.025641	0.074359	0.0410256	0.0435897	0.0769231	0.0128205	0.0230769	0.16624	0.315431	0.165388	0.352941	0.668372	0.480818	0.1091	0.5697	0.1063	0.407	0.29
Rv0753c	2.73463	13.4325	1.16214	6.6654	6.39836	6.02318	6.99767	0.974495	6.78177	12.4546	2.20419	0	0.217073	0.945064	1.2188	mmsA	1533	0	0.12549	0.00980392	0.0705882	0.0490196	0.0431373	0.109804	0.0254902	0.0607843	0.0313725	0.0686275	0.0215686	0.0235294	0.0568627	0.0352941	0.0607843	0.0431373	0.0411765	0.0901961	0.00980392	0.0235294	0.16895	0.332681	0.16047	0.3379	0.670581	0.493151	0.0782	0.6069	0.066	0.4683	0.332
Rv0754	0.410792	10.4604	1.19559	4.43895	4.20066	3.78057	4.67792	0.897341	6.76292	9.82735	1.99319	0	0.0151299	1.18046	1.01686	PE_PGRS11	1755	1	0.172945	0	0.0410959	0.0188356	0.0325342	0.179795	0.0171233	0.0565068	0.00171233	0.0839041	0.0171233	0.0462329	0.0633562	0.0393836	0.0188356	0.0410959	0.0582192	0.0787671	0.0119863	0.0205479	0.148718	0.320798	0.166382	0.364103	0.6849	0.487179	0.1259	0.4868	0.08	0.4593	0.281
Rv0755c	4.59315	10.33	0.802363	6.84379	6.87645	6.32193	7.32905	1.00712	6.78888	3.89363	0.376447	0	-0.133425	0.935788	0.868302	PPE12	1938	0	0.108527	0	0.0170543	0.0170543	0.0744186	0.231008	0.00775194	0.0372093	0.00310078	0.0496124	0.0124031	0.165891	0.0232558	0.0263566	0.0124031	0.0992248	0.0465116	0.0465116	0.0108527	0.0108527	0.214654	0.262642	0.199174	0.323529	0.586171	0.461816	0.205	0.48	0.1394	0.3645	0.274
Rv0756c	3.29317	9.96011	0.733796	7.23807	7.2791	6.82738	7.66343	0.836048	6.79044	5.57834	-0.457222	0	-0.190714	0.92451	0.811013	Rv0756c	726	0	0.153527	0	0.0871369	0.0414938	0	0.112033	0	0.0456432	0.0124481	0.145228	0.0456432	0.0248963	0.0580913	0.0373444	0.0829876	0.0497925	0.0497925	0.0497925	0.00414938	0	0.170799	0.341598	0.137741	0.349862	0.69146	0.479339	0.0773	0.5072	0.1287	0.4293	0.201
Rv0757	6.95086	11.5216	0.597319	8.62992	8.65628	8.24954	8.94076	0.691214	6.79333	4.55258	0.434811	0	-0.3451	0.942419	0.656626	phoP	744	1	0.0728745	0	0.0769231	0.0688259	0.0364372	0.0850202	0.0121457	0.0364372	0.0445344	0.117409	0.0161943	0.0283401	0.0445344	0.0161943	0.0931174	0.0364372	0.0688259	0.109312	0.00809717	0.0283401	0.189516	0.284946	0.18414	0.341398	0.626344	0.469086	0.1531	0.445	0.102	0.5134	0.271
Rv0758	3.0413	9.70959	0.617087	7.29296	7.33549	6.94545	7.62192	0.676472	6.79194	11.9683	-1.17006	0	-0.306639	0.923726	0.695088	phoR	1458	1	0.119588	0.00618557	0.0680412	0.0453608	0.014433	0.0762887	0.0206186	0.0391753	0.00618557	0.125773	0.0164948	0.0164948	0.0597938	0.0329897	0.103093	0.0721649	0.0597938	0.0969072	0.00618557	0.014433	0.157064	0.321674	0.170782	0.35048	0.672154	0.492455	0.1247	0.4226	0.1059	0.5013	0.196
Rv0759c	5.2639	10.7317	0.793402	8.30502	8.37239	7.86003	8.81359	0.953552	6.7911	3.43533	-0.163684	0	-0.139652	0.933055	0.862074	Rv0759c	333	0	0.127273	0.00909091	0.0454545	0.0363636	0.0545455	0.0636364	0.0454545	0.0636364	0.0181818	0.0909091	0.0363636	0.0272727	0.0636364	0.0545455	0.0636364	0.0636364	0.0454545	0.0818182	0.00909091	0	0.192192	0.324324	0.183183	0.3003	0.624625	0.507508	0.0957	0.5	0.1628	0.4557	0.236
Rv0760c	3.04713	10.6493	1.04267	7.85118	7.91425	7.18294	8.6128	1.42986	6.78659	3.60936	-0.482799	0	0.118518	0.924149	1.12024	Rv0760c	420	0	0.0791367	0.0143885	0.0647482	0.0647482	0.0503597	0.0863309	0.028777	0.057554	0.028777	0.057554	0.0359712	0.0431655	0.0359712	0.0359712	0.0431655	0.0791367	0.0863309	0.0719424	0.0215827	0.0143885	0.204762	0.307143	0.183333	0.304762	0.611905	0.490476	0.1239	0.6106	0.0693	0.4409	0.295
Rv0761c	4.88568	11.0284	0.91246	8.29277	8.43068	7.65104	8.98501	1.33397	6.78954	2.76954	-0.368673	0	-0.0202449	0.932705	0.981482	adhB	1128	0	0.088	0.0213333	0.072	0.0373333	0.0266667	0.125333	0.0186667	0.0586667	0.0453333	0.0826667	0.0373333	0.0293333	0.0453333	0.0346667	0.0346667	0.04	0.0613333	0.101333	0.008	0.032	0.187943	0.306738	0.171099	0.33422	0.640957	0.477837	0.0889	0.5905	0.0704	0.4771	0.38
Rv0762c	0	9.2908	0.721361	6.07655	6.06292	5.65295	6.47064	0.817688	6.78816	9.77763	-0.241568	0.00111857	-0.268152	0.989514	0.733574	Rv0762c	546	0	0.0718232	0.00552486	0.0773481	0.0662983	0.0331492	0.127072	0.0110497	0.038674	0.0441989	0.0662983	0.0220994	0.0331492	0.0441989	0.0497238	0.0662983	0.0220994	0.0331492	0.0828729	0.0497238	0.0552486	0.199634	0.287546	0.173993	0.338828	0.626374	0.461538	0.1286	0.6214	0.1154	0.3984	0.349
Rv0763c	0	8.45445	1.08425	5.04615	5.152	4.60893	5.58356	0.974635	6.76494	9.21762	-1.46348	0.0134228	-0.0222935	1.10654	0.979433	Rv0763c	207	0	0.102941	0.0441176	0.0441176	0.147059	0.0147059	0.0735294	0.0294118	0.0441176	0.0294118	0.0588235	0.0294118	0	0.0882353	0.0441176	0.0882353	0.0147059	0.0294118	0.0735294	0.0147059	0.0294118	0.21256	0.31401	0.140097	0.333333	0.647343	0.454106	0.1	0.56	0.2037	0.4118	0.211
Rv0764c	1.79802	9.67734	0.855506	5.73462	5.63254	5.25424	6.18937	0.935129	6.78451	6.61337	0.393909	0	-0.166649	1.02216	0.835077	cyp51	1356	0	0.097561	0.00886918	0.075388	0.075388	0.0532151	0.0731707	0.037694	0.0554324	0.0288248	0.0864745	0.0354767	0.0199557	0.0532151	0.0354767	0.0864745	0.0465632	0.037694	0.059867	0.00886918	0.0243902	0.19174	0.320796	0.175516	0.311947	0.632743	0.496313	0.1196	0.5598	0.1114	0.4691	0.315
Rv0765c	0.991015	9.48002	1.0232	5.38999	5.24796	4.89468	5.77473	0.880049	6.777	6.95912	0.240353	0	-0.0376654	1.06086	0.964061	Rv0765c	828	0	0.149091	0.00363636	0.04	0.0690909	0.0290909	0.105455	0.0254545	0.0254545	0.0218182	0.0945455	0.04	0.0145455	0.0654545	0.04	0.0727273	0.04	0.0472727	0.0981818	0.0109091	0.00727273	0.171498	0.326087	0.157005	0.345411	0.671498	0.483092	0.1067	0.5022	0.1535	0.4027	0.247
Rv0766c	3.53354	9.70396	0.974109	5.59217	5.44753	4.98041	6.11601	1.1356	6.78114	4.84642	1.01998	0	-0.0624669	1.03658	0.93926	cyp123	1209	0	0.109453	0.00497512	0.0895522	0.0621891	0.0373134	0.0472637	0.0348259	0.039801	0.00995025	0.114428	0.0298507	0.0273632	0.0522388	0.0174129	0.10199	0.0597015	0.0422886	0.0746269	0.00746269	0.0373134	0.179487	0.329198	0.183623	0.307692	0.63689	0.512821	0.1311	0.5014	0.1156	0.4712	0.289
Rv0767c	0.710924	10.6292	1.3535	5.06097	4.72865	4.253	5.40993	1.15693	6.76266	6.59117	1.52309	0	0.2489	1.1046	1.25063	Rv0767c	642	0	0.164319	0.00938967	0.0469484	0.0516432	0.028169	0.0704225	0.0234742	0.0422535	0.0187793	0.084507	0.0187793	0.0187793	0.0516432	0.028169	0.0798122	0.056338	0.0751174	0.103286	0	0.028169	0.17134	0.358255	0.15109	0.319315	0.67757	0.509346	0.0741	0.5608	0.1243	0.4048	0.287
Rv0768	3.02517	11.7587	1.147	5.45135	5.24636	4.77531	5.77598	1.00067	6.77563	9.74724	1.99989	0	0.0938907	1.05311	1.09562	aldA	1470	1	0.161554	0.0143149	0.0674847	0.0552147	0.0286299	0.100204	0.0122699	0.0490798	0.0204499	0.0797546	0.0184049	0.0245399	0.0531697	0.0224949	0.0695297	0.0511247	0.0593047	0.0817996	0.0122699	0.0184049	0.17483	0.320408	0.170068	0.334694	0.655102	0.490476	0.1385	0.5023	0.1374	0.3984	0.242
Rv0769	3.86171	10.746	0.909721	5.76393	5.62813	5.19412	6.13535	0.941221	6.78416	10.0474	1.94085	0	-0.109585	1.01931	0.892141	Rv0769	747	1	0.137097	0.00806452	0.0645161	0.0241935	0.0241935	0.108871	0.0120968	0.0685484	0.0443548	0.0766129	0.0362903	0.0403226	0.0282258	0.0403226	0.0362903	0.0524194	0.0524194	0.104839	0.00806452	0.0322581	0.191432	0.291834	0.191432	0.325301	0.617135	0.483266	0.1524	0.5238	0.0781	0.4571	0.325
Rv0770	0.782137	9.32933	0.873135	4.82271	4.79041	4.3585	5.23764	0.879143	6.77909	8.25794	0.55167	0	-0.261177	1.13431	0.74055	Rv0770	888	1	0.172881	0.00338983	0.0610169	0.0576271	0.0271186	0.0949153	0.0271186	0.0440678	0.0338983	0.105085	0.0271186	0.0135593	0.0610169	0.0237288	0.0440678	0.0474576	0.0644068	0.0779661	0.00677966	0.00677966	0.176802	0.315315	0.163288	0.344595	0.65991	0.478604	0.1275	0.4622	0.1189	0.4675	0.295
Rv0771	0	8.26823	0.904332	4.70891	4.63205	4.09863	5.27115	1.17252	6.77583	5.7713	0.0030588	0.0033557	-0.24363	1.14796	0.758096	Rv0771	435	1	0.104167	0	0.0694444	0.0763889	0.0347222	0.0625	0.0208333	0.0347222	0.0416667	0.111111	0.0486111	0.0416667	0.0347222	0.0277778	0.0763889	0.0555556	0.0486111	0.0833333	0.0138889	0.0138889	0.206897	0.301149	0.186207	0.305747	0.606897	0.487356	0.1754	0.5263	0.1193	0.4038	0.289
Rv0772	1.96926	7.49985	0.692402	5.78411	5.86499	5.45935	6.23063	0.771282	6.78815	5.106	-1.00257	0	-0.324943	1.01734	0.676784	purD	1269	1	0.151659	0.00947867	0.0687204	0.0545024	0.0236967	0.116114	0.021327	0.0379147	0.021327	0.0995261	0.00947867	0.014218	0.0545024	0.0118483	0.07109	0.049763	0.0331754	0.130332	0.007109	0.014218	0.148936	0.308905	0.180457	0.361702	0.670607	0.489362	0.1398	0.4723	0.1307	0.4107	0.255
Rv0773c	1.23889	8.00741	1.00649	6.5136	6.73351	6.11532	7.21662	1.10131	6.78212	7.393	-1.73191	0	0.0520871	0.954408	1.05381	ggtA	1539	0	0.132812	0.00976562	0.0585938	0.0332031	0.0429688	0.103516	0.0273438	0.0429688	0.0175781	0.0703125	0.0292969	0.03125	0.0683594	0.0410156	0.0585938	0.0566406	0.046875	0.0859375	0.0175781	0.0253906	0.176088	0.325536	0.174789	0.323587	0.649123	0.500325	0.1247	0.5057	0.1366	0.429	0.263
Rv0774c	3.03308	8.63762	0.874248	7.04328	7.30777	6.745	7.5932	0.848201	6.78721	7.31396	-1.89518	0	-0.0543404	0.928588	0.947386	Rv0774c	912	0	0.168317	0.00660066	0.039604	0.0165017	0.0330033	0.125413	0.0165017	0.0264026	0.00660066	0.105611	0.029703	0.0231023	0.0957096	0.0363036	0.0429043	0.0825083	0.049505	0.0594059	0.0231023	0.0132013	0.142544	0.35636	0.167763	0.333333	0.689693	0.524123	0.0967	0.4907	0.1336	0.4017	0.262
Rv0775	4.40731	9.29673	0.62704	6.97844	7.04273	6.56396	7.38025	0.81629	6.79163	3.92068	-0.143712	0	-0.303493	0.930533	0.698234	Rv0775	624	1	0.149758	0.0144928	0.0434783	0.0772947	0.0144928	0.0628019	0.0144928	0.0434783	0.00483092	0.111111	0.0193237	0	0.0434783	0.0241546	0.130435	0.0724638	0.0434783	0.111111	0	0.0193237	0.137821	0.317308	0.179487	0.365385	0.682692	0.496795	0.1326	0.4254	0.105	0.4826	0.236
Rv0776c	0	7.99453	0.960086	4.562	4.59456	4.01311	5.16098	1.14788	6.77163	5.42626	-0.287912	0.00111857	-0.205543	1.16563	0.796184	Rv0776c	780	0	0.173745	0.011583	0.0810811	0.030888	0.030888	0.0656371	0.003861	0.015444	0.023166	0.0926641	0.015444	0.015444	0.0694981	0.034749	0.111969	0.030888	0.046332	0.104247	0.00772201	0.034749	0.147436	0.335897	0.166667	0.35	0.685897	0.502564	0.1348	0.4522	0.1111	0.468	0.211
Rv0777	2.95522	8.81181	0.568468	7.41473	7.48287	7.21516	7.75878	0.543625	6.79254	14.4411	-2.32546	0	-0.354118	0.922585	0.647609	purB	1419	1	0.158898	0.00423729	0.065678	0.0614407	0.029661	0.0720339	0.0275424	0.0317797	0.0211864	0.110169	0.0338983	0.0169492	0.0317797	0.0275424	0.0889831	0.0550847	0.0360169	0.0995763	0.00635593	0.0211864	0.157153	0.286117	0.186751	0.369979	0.656096	0.472868	0.1393	0.4154	0.0851	0.5512	0.253
Rv0778	3.58434	8.32072	0.656405	6.75703	6.90684	6.5883	7.12069	0.532389	6.79063	7.83944	-1.86146	0	-0.28367	0.940075	0.718057	cyp126	1245	1	0.0917874	0.00483092	0.0676329	0.0724638	0.0458937	0.0821256	0.0289855	0.0362319	0.00966184	0.111111	0.0193237	0.0241546	0.0628019	0.0217391	0.0990338	0.0555556	0.0603865	0.0748792	0.0144928	0.0169082	0.169478	0.306024	0.194378	0.33012	0.636145	0.500402	0.1653	0.437	0.1211	0.4756	0.257
Rv0779c	0	8.58293	1.16859	4.20525	4.08255	3.51174	5.00309	1.49135	6.75453	4.24258	0.117744	0.00223714	-0.0401213	1.20872	0.961605	Rv0779c	621	0	0.199029	0.00485437	0.0436893	0.0194175	0.0145631	0.0825243	0.0145631	0.0631068	0.00970874	0.135922	0.0194175	0.0194175	0.0582524	0.0291262	0.0825243	0.0339806	0.0728155	0.0631068	0.0291262	0.00485437	0.141707	0.371981	0.149758	0.336554	0.708535	0.521739	0.0761	0.5326	0.0857	0.4259	0.247
Rv0780	2.79258	7.93753	0.81674	6.39014	6.53961	6.02312	6.93773	0.914612	6.78692	5.58053	-1.31978	0	-0.146356	0.963096	0.855371	purC	894	1	0.10101	0.00673401	0.0942761	0.0505051	0.040404	0.0740741	0.023569	0.0505051	0.023569	0.0976431	0.013468	0.016835	0.0673401	0.023569	0.0841751	0.0572391	0.0505051	0.0740741	0.013468	0.037037	0.175615	0.324385	0.186801	0.313199	0.637584	0.511186	0.1615	0.5115	0.0938	0.445	0.336
Rv0783c	3.76419	8.49819	0.564778	6.57683	6.60272	6.2594	6.90793	0.648534	6.79197	4.61395	-0.292851	0	-0.385567	0.950344	0.61616	emrB	1623	0	0.137037	0.00740741	0.0259259	0.012963	0.0425926	0.101852	0.0203704	0.0555556	0.00925926	0.12963	0.0481481	0.0166667	0.0648148	0.0388889	0.0537037	0.062963	0.0537037	0.0907407	0.0111111	0.0166667	0.15342	0.313617	0.210721	0.322243	0.63586	0.524338	0.1221	0.4211	0.1393	0.4632	0.238
Rv0784	1.57715	8.85196	0.860139	5.78582	5.77106	5.37285	6.25944	0.88659	6.78416	5.61197	-0.379675	0	-0.157039	1.01718	0.844687	Rv0784	687	1	0.153509	0.0131579	0.0745614	0.0394737	0.0219298	0.0789474	0.0219298	0.0219298	0.00877193	0.127193	0.0438596	0.00877193	0.0394737	0.00877193	0.131579	0.0350877	0.0438596	0.0921053	0.0219298	0.0131579	0.135371	0.311499	0.181951	0.371179	0.682678	0.49345	0.1393	0.408	0.1229	0.4713	0.224
Rv0785	3.16469	7.72196	0.653503	5.829	5.8519	5.48376	6.2537	0.769945	6.7892	4.60051	-0.675598	0	-0.359484	1.01299	0.642243	Rv0785	1701	1	0.116608	0.00706714	0.0618375	0.0477032	0.0353357	0.121908	0.0282686	0.0512367	0.0318021	0.090106	0.0106007	0.024735	0.0547703	0.0265018	0.090106	0.0388693	0.0441696	0.0759717	0.0212014	0.0212014	0.164021	0.285714	0.194004	0.356261	0.641975	0.479718	0.1963	0.4254	0.0915	0.4869	0.247
Rv0786c	3.71217	8.65847	0.660045	6.42595	6.47219	5.99633	6.84303	0.8467	6.79039	3.99947	-0.0455056	0	-0.300424	0.960469	0.701302	Rv0786c	639	0	0.122642	0.00943396	0.0566038	0.0660377	0.0377358	0.0707547	0.0566038	0.0566038	0.00943396	0.103774	0.0188679	0.00943396	0.0801887	0.0377358	0.0471698	0.0330189	0.0707547	0.0801887	0.00943396	0.0235849	0.178404	0.338028	0.184664	0.298905	0.636933	0.522692	0.1484	0.5	0.1152	0.451	0.294
Rv0787	1.0778	8.72816	1.52744	5.19859	4.79794	4.13767	6.80238	2.66471	6.75296	2.20605	0.418983	0	0.44123	1.08621	1.44296	Rv0787	960	1	0.137931	0.0219436	0.0438871	0.0501567	0.015674	0.0752351	0.0219436	0.0376176	0	0.0909091	0.031348	0.0031348	0.0783699	0.0595611	0.0689655	0.0626959	0.0658307	0.0909091	0.0250784	0.0188088	0.154167	0.322917	0.173958	0.348958	0.671875	0.496875	0.1311	0.4457	0.1145	0.472	0.293
Rv0787A	5.52659	11.2478	0.781004	8.45116	8.45803	7.93511	9.00046	1.06535	6.79141	3.93154	-0.0370338	0	-0.156351	0.937355	0.845375	Rv0787A	240	1	0.0886076	0	0.101266	0.0759494	0.0126582	0.0759494	0.0253165	0.0759494	0.0253165	0.101266	0.0253165	0.0126582	0.0379747	0.0506329	0.0632911	0.0379747	0.0632911	0.113924	0.0126582	0	0.2	0.241667	0.191667	0.366667	0.608333	0.433333	0.2154	0.3385	0.0923	0.5932	0.204
Rv0788	3.88051	9.64904	0.558198	7.8657	7.92162	7.60294	8.1973	0.594355	6.79306	11.5335	-1.61264	0	-0.366077	0.924276	0.635649	purQ	675	1	0.125	0.0178571	0.0803571	0.0491071	0.0357143	0.116071	0.0223214	0.03125	0.0133929	0.102679	0.0178571	0.0223214	0.0491071	0.00892857	0.0669643	0.0446429	0.0401786	0.120536	0.0133929	0.0223214	0.146667	0.297778	0.194074	0.361481	0.659259	0.491852	0.1386	0.4604	0.1156	0.4639	0.267
Rv0789c	3.2509	12.5859	1.30671	6.22074	6.13716	5.26352	7.21123	1.94771	6.77391	4.3723	0.532902	0	0.329989	0.976719	1.33172	Rv0789c	600	0	0.115578	0	0.0502513	0.0502513	0.0603015	0.0502513	0.0653266	0.0502513	0.00502513	0.080402	0.0100503	0.040201	0.0653266	0.0100503	0.130653	0.0753769	0.0552764	0.0603015	0.00502513	0.0201005	0.17	0.365	0.183333	0.281667	0.646667	0.548333	0.1359	0.5326	0.1	0.4214	0.238
Rv0790c	0	13.0651	1.16258	5.87259	5.73774	5.27761	6.21515	0.937545	6.7766	8.12073	1.22875	0.00111857	0.153809	1.00877	1.15554	Rv0790c	729	0	0.136364	0.00826446	0.0619835	0.0495868	0.0330579	0.0743802	0.0330579	0.0371901	0.0206612	0.0867769	0.0123967	0.0123967	0.0619835	0.0289256	0.0826446	0.0454545	0.0743802	0.0743802	0.0206612	0.0454545	0.186557	0.347051	0.164609	0.301783	0.648834	0.51166	0.1143	0.5381	0.1658	0.3708	0.249
Rv0791c	1.58083	13.4834	1.24663	5.76741	5.60778	5.01635	6.14853	1.13218	6.77399	7.62439	1.56541	0	0.227657	1.01897	1.22938	Rv0791c	1044	0	0.0951009	0.0172911	0.0518732	0.0576369	0.0288184	0.092219	0.0230548	0.0489914	0.0230548	0.092219	0.0115274	0.0144092	0.0720461	0.0403458	0.0720461	0.0634006	0.0720461	0.0778098	0.0201729	0.0259366	0.17433	0.332375	0.181034	0.312261	0.644636	0.51341	0.1395	0.5136	0.1214	0.4183	0.256
Rv0792c	3.15961	13.6671	1.3598	6.26968	6.03534	5.41906	6.72195	1.30289	6.77391	6.56887	1.52079	0	0.387199	0.972598	1.38893	Rv0792c	810	0	0.0929368	0.0111524	0.0483271	0.0557621	0.0148699	0.0892193	0.0185874	0.0446097	0.0148699	0.115242	0.0111524	0.00371747	0.0669145	0.0520446	0.0966543	0.0669145	0.070632	0.104089	0.00743494	0.0148699	0.171605	0.316049	0.18642	0.325926	0.641975	0.502469	0.1602	0.4416	0.1496	0.4054	0.221
Rv0793	0	10.5618	1.64954	4.364	4.32069	3.30356	5.47334	2.16978	6.71691	3.90583	0.25386	0.0145414	0.460023	1.18951	1.46175	Rv0793	306	1	0.138614	0.00990099	0.0693069	0.0693069	0.019802	0.049505	0.019802	0.029703	0	0.118812	0.029703	0.00990099	0.0693069	0.00990099	0.118812	0.0693069	0.049505	0.0693069	0	0.049505	0.156863	0.346405	0.179739	0.316993	0.663399	0.526144	0.1444	0.5	0.1	0.4156	0.225
Rv0794c	2.41052	8.31847	0.739936	5.61703	5.61554	5.18513	6.03303	0.847903	6.78692	4.78251	0.0429249	0	-0.293953	1.03389	0.707773	Rv0794c	1500	0	0.134269	0.012024	0.0761523	0.0400802	0.0160321	0.12024	0.0220441	0.0360721	0.01002	0.0861723	0.0160321	0.0140281	0.0501002	0.0260521	0.0861723	0.0380762	0.0681363	0.112224	0.0200401	0.0160321	0.165333	0.331333	0.160667	0.342667	0.674	0.492	0.1309	0.526	0.1563	0.3299	0.254
Rv0798c	2.18918	9.37157	1.05386	7.25296	7.47793	6.85085	7.89081	1.03996	6.78393	6.99602	-1.65688	0	0.129572	0.924285	1.1313	cfp29	798	0	0.113208	0.00377358	0.0830189	0.0679245	0.0264151	0.0641509	0.0226415	0.0566038	0.0301887	0.0981132	0.00377358	0.0226415	0.0528302	0.0113208	0.0716981	0.0754717	0.0679245	0.0867925	0.0113208	0.0301887	0.194236	0.317043	0.177945	0.310777	0.62782	0.494987	0.1422	0.5086	0.1185	0.4337	0.268
Rv0799c	2.60093	9.05408	0.902587	7.06938	7.23243	6.65481	7.64595	0.991134	6.78698	5.40818	-1.21924	0	-0.0253119	0.927899	0.976415	Rv0799c	1008	0	0.0895522	0.00597015	0.080597	0.0477612	0.0537313	0.0895522	0.0328358	0.0537313	0.0298507	0.0835821	0.0208955	0.0268657	0.0746269	0.0149254	0.0537313	0.0597015	0.080597	0.080597	0.00597015	0.0149254	0.188492	0.330357	0.189484	0.291667	0.622024	0.519841	0.1419	0.5169	0.1294	0.4177	0.294
Rv0800	0	7.89179	0.827456	5.51937	5.60232	5.19636	5.98138	0.78502	6.7821	12.4944	-2.01981	0.00111857	-0.217413	1.04487	0.784313	pepC	1302	1	0.152425	0.0115473	0.0623557	0.0415704	0.0230947	0.0831409	0.0484988	0.0300231	0.00923788	0.106236	0.0184758	0.0184758	0.0554273	0.0300231	0.0715935	0.073903	0.0438799	0.0854503	0.0138568	0.0207852	0.152074	0.339478	0.15745	0.350998	0.690476	0.496928	0.0911	0.4688	0.1003	0.5215	0.267
Rv0801	0	9.48962	0.849846	6.59436	6.66871	6.14674	7.17221	1.02547	6.78639	9.05553	-1.38603	0.00111857	-0.0994155	0.949262	0.902311	Rv0801	348	1	0.113043	0.0173913	0.0782609	0.0695652	0.0608696	0.0956522	0.0173913	0	0.0434783	0.0869565	0.0173913	0.0173913	0.0608696	0.0347826	0.0608696	0.026087	0.0521739	0.121739	0.026087	0	0.172414	0.29023	0.183908	0.353448	0.643678	0.474138	0.172	0.5054	0.1136	0.4205	0.228
Rv0802c	3.4999	7.85835	0.76161	5.65117	5.62566	5.12959	6.16983	1.04023	6.78657	2.90919	0.0336419	0	-0.268723	1.03033	0.733003	Rv0802c	657	0	0.0779817	0.00917431	0.0825688	0.0504587	0.0504587	0.0642202	0.0229358	0.0229358	0.00917431	0.119266	0.0183486	0.0183486	0.0642202	0.0458716	0.114679	0.059633	0.0504587	0.0688073	0.0275229	0.0229358	0.162861	0.312024	0.200913	0.324201	0.636225	0.512938	0.1514	0.427	0.135	0.5	0.265
Rv0803	3.20458	9.64115	0.732858	7.05806	7.18555	6.67868	7.55041	0.871721	6.78998	7.3131	-1.3363	0	-0.195333	0.928191	0.806393	purL	2265	1	0.11008	0.0185676	0.066313	0.061008	0.0251989	0.115385	0.0159151	0.035809	0.0172414	0.0994695	0.0212202	0.0198939	0.0517241	0.0291777	0.0649867	0.0583554	0.0570292	0.100796	0.00795756	0.0238727	0.155408	0.323179	0.16777	0.353642	0.676821	0.490949	0.0874	0.5368	0.0893	0.4706	0.285
Rv0804	0	8.73132	1.10212	6.09068	6.308	5.79195	6.71499	0.923044	6.77451	10.9828	-2.19597	0.0033557	0.113897	0.988222	1.11562	Rv0804	630	1	0.191388	0	0.00956938	0.0239234	0.0191388	0.114833	0.0143541	0.0430622	0	0.143541	0.0239234	0.00478469	0.062201	0.0143541	0.0861244	0.0669856	0.0574163	0.076555	0.0478469	0	0.0873016	0.301587	0.196825	0.414286	0.715873	0.498413	0.1505	0.3065	0.0435	0.5771	0.221
Rv0805	6.80033	12.4157	0.700767	9.89104	9.91862	9.53838	10.3016	0.763221	6.79316	4.60365	-0.41379	0	-0.279684	0.98045	0.722043	Rv0805	957	1	0.103774	0.00943396	0.0754717	0.0471698	0.0220126	0.0943396	0.0471698	0.0471698	0.0157233	0.116352	0.0188679	0.0125786	0.0691824	0.0251572	0.0786164	0.0534591	0.0534591	0.0849057	0.00628931	0.0188679	0.173459	0.3093	0.195402	0.321839	0.631139	0.504702	0.1802	0.4205	0.1389	0.4473	0.233
Rv0806c	3.49068	9.02562	1.14235	6.08587	5.91102	5.30867	7.07775	1.76908	6.77809	2.33208	0.201716	0	0.153685	0.988661	1.15541	cpsY	1599	0	0.0958647	0.0056391	0.0526316	0.0639098	0.056391	0.0545113	0.0225564	0.0545113	0.0338346	0.0808271	0.0206767	0.0319549	0.075188	0.0244361	0.0996241	0.0620301	0.0469925	0.0733083	0.0112782	0.0338346	0.197624	0.317699	0.196998	0.28768	0.605378	0.514697	0.1689	0.4956	0.145	0.4153	0.261
Rv0807	0	8.43296	0.997682	5.73951	5.73093	5.12167	6.43068	1.30901	6.77951	4.73704	-0.44819	0.00111857	-0.023999	1.02168	0.977728	Rv0807	390	1	0.162791	0.00775194	0.0620155	0.0310078	0.00775194	0.0775194	0.00775194	0.0232558	0.00775194	0.124031	0.00775194	0.00775194	0.0852713	0.0387597	0.0930233	0.0542636	0.0775194	0.100775	0.0232558	0	0.125641	0.338462	0.171795	0.364103	0.702564	0.510256	0.1565	0.4	0.0796	0.4727	0.192
Rv0808	4.02957	10.7497	0.779623	8.44249	8.35372	7.98077	8.91815	0.93738	6.79141	5.09201	-0.0223347	0	-0.157476	0.937099	0.844251	purF	1584	1	0.13852	0.0189753	0.0588235	0.0607211	0.0246679	0.0948767	0.0170778	0.0436433	0.0189753	0.0929791	0.0151803	0.028463	0.0531309	0.0360531	0.0740038	0.0436433	0.056926	0.0872865	0.00759013	0.028463	0.166667	0.338384	0.162879	0.332071	0.670455	0.501263	0.1033	0.5495	0.104	0.4375	0.269
Rv0809	5.60718	10.452	0.695606	7.96287	7.87215	7.6013	8.50216	0.900862	6.79187	3.62512	-0.0279347	0	-0.229685	0.925291	0.772042	purM	1095	1	0.10989	0.0192308	0.0659341	0.0549451	0.0247253	0.129121	0.0247253	0.0494505	0.0357143	0.101648	0.0274725	0.0137363	0.0494505	0.0137363	0.0714286	0.0302198	0.0604396	0.0961538	0.00549451	0.0164835	0.174429	0.310502	0.175342	0.339726	0.650228	0.485845	0.1306	0.5382	0.113	0.3978	0.268
Rv0810c	7.74712	14.5684	0.782557	10.9073	10.91	10.5147	11.2844	0.769672	6.79312	5.3979	-0.0411234	0	-0.239835	1.02239	0.761891	Rv0810c	183	0	0.05	0	0.166667	0.05	0.0166667	0.1	0	0	0.0666667	0.0666667	0.0166667	0.0166667	0.0333333	0.0666667	0.133333	0.0833333	0.0666667	0.0166667	0.0333333	0.0166667	0.224044	0.295082	0.136612	0.344262	0.639344	0.431694	0.1739	0.5217	0.1364	0.4318	0.361
Rv0811c	5.21227	9.95121	0.646772	7.49865	7.39768	7.08481	7.8652	0.780388	6.79204	4.76273	0.681292	0	-0.275553	0.922325	0.726174	Rv0811c	1107	0	0.111413	0.00271739	0.0733696	0.0543478	0.00271739	0.122283	0.0326087	0.0271739	0.0108696	0.116848	0.0163043	0.00815217	0.0706522	0.0326087	0.0978261	0.0298913	0.048913	0.103261	0.0244565	0.013587	0.155375	0.311653	0.164408	0.368564	0.680217	0.476061	0.1698	0.4151	0.1377	0.4271	0.226
Rv0812	2.86117	8.16532	0.864271	6.33221	6.372	5.87568	6.99429	1.11861	6.78592	4.26492	-0.757074	0	-0.103266	0.967537	0.89846	Rv0812	870	1	0.128028	0.0103806	0.0795848	0.0380623	0.017301	0.0899654	0.0138408	0.0380623	0.00692042	0.110727	0.0242215	0.00692042	0.0622837	0.0311419	0.0968858	0.0484429	0.0588235	0.0968858	0.017301	0.0242215	0.151724	0.318391	0.183908	0.345977	0.664368	0.502299	0.1641	0.4531	0.1111	0.4215	0.247
Rv0813c	3.61603	12.1625	0.861176	8.22764	8.20816	7.76222	8.68405	0.921839	6.79018	6.70116	0.0940215	0	-0.0697217	0.930898	0.932005	Rv0813c	681	0	0.137168	0	0.0752212	0.0619469	0.0265487	0.137168	0.0176991	0.0176991	0.00884956	0.10177	0.00442478	0.0221239	0.0442478	0.0221239	0.0840708	0.0707965	0.0309735	0.079646	0.0221239	0.0353982	0.14978	0.318649	0.174743	0.356828	0.675477	0.493392	0.14	0.505	0.1326	0.3842	0.269
Rv0814c	0.367495	10.418	1.45193	7.45948	7.61007	6.98903	8.30251	1.31348	6.77386	6.05528	-1.28439	0	0.529527	0.922399	1.53125	Rv0814c	303	0	0.13	0.01	0.08	0.05	0.05	0.13	0.01	0.03	0.03	0.07	0.01	0.01	0.04	0.03	0.04	0.08	0.07	0.12	0.01	0	0.158416	0.323432	0.155116	0.363036	0.686469	0.478548	0.0345	0.5632	0.122	0.4557	0.304
Rv0815c	0	7.85313	1.41661	4.92565	5.07699	4.01002	5.99152	1.9815	6.75002	2.78832	-0.435722	0.00223714	0.294693	1.12192	1.29642	cysA2	834	0	0.0938628	0.00722022	0.0866426	0.0649819	0.032491	0.0685921	0.0252708	0.0469314	0.0541516	0.0866426	0.00361011	0.0469314	0.0505415	0.0252708	0.0577617	0.0758123	0.0361011	0.0685921	0.0288809	0.0397112	0.214628	0.318945	0.167866	0.298561	0.617506	0.486811	0.1096	0.6272	0.104	0.418	0.316
Rv0816c	0	8.87122	1.21942	5.38247	5.20777	4.60331	6.36534	1.76203	6.76805	3.69439	-0.246065	0.00223714	0.157585	1.06183	1.15931	thiX	423	0	0.142857	0.0214286	0.0642857	0.0285714	0.0214286	0.0785714	0.0142857	0.0357143	0.0142857	0.107143	0.0142857	0.00714286	0.0714286	0.0142857	0.107143	0.0571429	0.0857143	0.1	0.00714286	0.00714286	0.13948	0.333333	0.184397	0.34279	0.676123	0.51773	0.1473	0.3953	0.1186	0.469	0.22
Rv0817c	1.56811	7.4915	0.85214	5.25684	5.35348	4.79669	5.82236	1.02567	6.78171	4.22518	-0.770423	0	-0.226249	1.07839	0.775477	Rv0817c	813	0	0.118519	0	0.062963	0.0444444	0.037037	0.0814815	0.0222222	0.0703704	0.0296296	0.0814815	0.0222222	0.0185185	0.0555556	0.0185185	0.0592593	0.0851852	0.0666667	0.103704	0.0037037	0.0185185	0.179582	0.328413	0.174662	0.317343	0.645756	0.503075	0.0966	0.542	0.0909	0.4527	0.262
Rv0818	5.27003	10.3337	0.590674	8.59399	8.60067	8.22568	8.97275	0.747071	6.79331	4.94513	-0.451606	0	-0.350783	0.941457	0.650943	Rv0818	768	1	0.0980392	0.00392157	0.0784314	0.0666667	0.0156863	0.0941176	0.0196078	0.0196078	0.0196078	0.164706	0.00784314	0.0117647	0.0627451	0.0196078	0.0941176	0.0588235	0.0470588	0.0862745	0.00784314	0.0235294	0.154948	0.30599	0.169271	0.369792	0.675781	0.47526	0.1111	0.4	0.108	0.5481	0.267
Rv0819	3.07303	9.28979	0.628398	7.27997	7.32191	6.95101	7.67244	0.72143	6.7918	8.94131	-1.15425	0	-0.295502	0.9239	0.706224	mshD	948	1	0.130159	0	0.0539683	0.047619	0.0190476	0.114286	0.0222222	0.031746	0.00952381	0.107937	0.015873	0.0190476	0.0634921	0.0380952	0.0952381	0.0412698	0.0698413	0.0825397	0.015873	0.0222222	0.150844	0.332278	0.163502	0.353376	0.685654	0.495781	0.1449	0.4565	0.0989	0.4506	0.28
Rv0820	3.49799	9.71433	1.0685	7.27382	7.10721	6.64166	7.95861	1.31696	6.78484	2.8976	0.0666832	0	0.14451	0.923985	1.14624	phoT	777	1	0.0891473	0.0116279	0.0697674	0.0426357	0.0310078	0.0813953	0.0116279	0.0697674	0.0387597	0.0891473	0.0271318	0.0426357	0.0542636	0.0503876	0.0697674	0.0620155	0.0465116	0.0891473	0.00387597	0.0193798	0.199485	0.305019	0.184041	0.311454	0.616474	0.48906	0.1336	0.5069	0.1084	0.4865	0.254
Rv0821c	6.67169	11.5799	0.736505	9.46005	9.39764	8.9875	9.88546	0.897967	6.79268	3.18825	0.127778	0	-0.228772	0.965277	0.772954	phoY2	642	0	0.169014	0.00469484	0.0610329	0.0938967	0.0328638	0.0469484	0.0469484	0.0422535	0.0187793	0.107981	0.0375587	0.00938967	0.0234742	0.0469484	0.0798122	0.0422535	0.028169	0.0892019	0.00469484	0.0140845	0.200935	0.299065	0.172897	0.327103	0.626168	0.471963	0.1176	0.5059	0.1786	0.4277	0.231
Rv0822c	5.51148	10.1749	0.912357	7.77081	7.59031	7.12912	8.307	1.17788	6.78894	2.85457	0.588106	0	-0.0111222	0.923479	0.990604	Rv0822c	2055	0	0.109649	0.00730994	0.0614035	0.0438596	0.0307018	0.0774854	0.0190058	0.0380117	0.0292398	0.0833333	0.0175439	0.0467836	0.0760234	0.0423977	0.0614035	0.0760234	0.0804094	0.0774854	0.00877193	0.0131579	0.190268	0.349392	0.156691	0.30365	0.653041	0.506083	0.1158	0.5503	0.0882	0.4382	0.271
Rv0823c	5.64164	12.2383	1.23487	9.5666	9.62843	8.75518	10.4846	1.72939	6.7872	2.78387	-0.307776	0	0.266034	0.96884	1.26776	Rv0823c	1170	0	0.141388	0.0179949	0.0694087	0.0385604	0.0308483	0.102828	0.0308483	0.0488432	0.0231362	0.0822622	0.0308483	0.00771208	0.0642674	0.0231362	0.0848329	0.0411311	0.0694087	0.066838	0.0102828	0.0154242	0.166667	0.346154	0.161538	0.325641	0.671795	0.507692	0.1206	0.5412	0.1176	0.3902	0.278
Rv0824c	7.25774	14.2075	1.12596	11.3977	11.5057	10.6743	12.1183	1.44401	6.79076	2.87583	-0.299888	0	0.0815733	1.04439	1.0833	desA1	1017	0	0.0769231	0.00591716	0.0710059	0.0710059	0.0325444	0.0532544	0.0443787	0.0325444	0.0591716	0.10355	0.035503	0.0414201	0.0414201	0.0443787	0.0650888	0.056213	0.0295858	0.0857988	0.0207101	0.0295858	0.219272	0.314651	0.164208	0.301868	0.616519	0.478859	0.1	0.6192	0.0988	0.4655	0.321
Rv0825c	0	8.73169	0.83902	6.52492	6.61244	5.95535	7.10105	1.1457	6.78673	6.5756	-0.805366	0.00111857	-0.114641	0.953661	0.887085	Rv0825c	642	0	0.117371	0.0140845	0.0375587	0.0610329	0.0328638	0.0798122	0.028169	0.0234742	0.0140845	0.117371	0.0234742	0.028169	0.0516432	0.0375587	0.0985915	0.0469484	0.0657277	0.084507	0.00938967	0.028169	0.185358	0.34891	0.168224	0.297508	0.646417	0.517134	0.0874	0.5683	0.1871	0.3313	0.283
Rv0826	0	10.7153	1.26016	5.02321	4.80589	4.21758	5.67045	1.45287	6.76556	6.0444	1.15842	0.00111857	0.150621	1.10954	1.15235	Rv0826	1056	1	0.0797721	0.014245	0.0626781	0.037037	0.0541311	0.0826211	0.031339	0.017094	0.014245	0.0911681	0.025641	0.019943	0.0968661	0.037037	0.105413	0.031339	0.0512821	0.0740741	0.039886	0.034188	0.148674	0.331439	0.189394	0.330492	0.661932	0.520833	0.1376	0.4765	0.1028	0.4858	0.281
Rv0827c	0	11.2163	1.49846	6.22724	6.15274	5.07752	7.15547	2.07795	6.76662	3.41046	0.431149	0.00111857	0.522292	0.976164	1.52402	kmtR	393	0	0.123077	0.00769231	0.0692308	0.0538462	0.0230769	0.0615385	0.0384615	0.0230769	0.0307692	0.0923077	0.0307692	0.0230769	0.0538462	0.0461538	0.0923077	0.0538462	0.0384615	0.115385	0.00769231	0.0153846	0.178117	0.320611	0.178117	0.323155	0.643766	0.498728	0.1574	0.4815	0.1176	0.4444	0.234
Rv0828c	0	7.45403	1.10421	3.81827	3.91214	3.2507	4.41563	1.16494	6.7436	5.1772	-0.565809	0.0201342	-0.151493	1.2557	0.850233	Rv0828c	423	0	0.121429	0.0285714	0.0642857	0.0714286	0.0428571	0.0642857	0.0357143	0.0214286	0.0142857	0.0571429	0.0285714	0.0214286	0.0785714	0.0285714	0.1	0.0357143	0.0642857	0.05	0.0142857	0.0571429	0.184397	0.333333	0.177305	0.304965	0.638298	0.510638	0.1949	0.5169	0.1111	0.4062	0.288
Rv0830	2.40152	10.7323	1.28434	6.40455	6.25554	5.47536	7.56385	2.08849	6.77568	2.86409	0.31636	0	0.322307	0.962028	1.32403	Rv0830	906	1	0.146179	0.00332226	0.0996678	0.0498339	0.0498339	0.0564784	0.013289	0.0299003	0.00664452	0.0963455	0.0265781	0.0166113	0.0465116	0.0332226	0.0730897	0.0431894	0.0730897	0.0730897	0.0232558	0.0398671	0.168874	0.304636	0.199779	0.326711	0.631347	0.504415	0.2046	0.4672	0.0731	0.4571	0.295
Rv0831c	5.79989	11.367	0.866382	9.33871	9.52039	8.93016	9.93801	1.00785	6.79119	5.64019	-1.33685	0	-0.0950035	0.961385	0.906723	Rv0831c	816	0	0.0774908	0	0.0590406	0.0590406	0.0369004	0.0701107	0.0110701	0.0516605	0.0147601	0.095941	0.0184502	0.0369004	0.0701107	0.0590406	0.0774908	0.0516605	0.0738007	0.0922509	0.0184502	0.0258303	0.198529	0.314951	0.197304	0.289216	0.604167	0.512255	0.2133	0.4756	0.1302	0.3881	0.259
Rv0832	2.2807	9.69145	0.849414	6.96253	7.08111	6.66117	7.39381	0.732648	6.78782	6.30582	-1.00159	0	-0.0816508	0.931064	0.920076	PE_PGRS12	414	1	0.29927	0	0.0218978	0.0291971	0.0364964	0.10219	0.0218978	0.0437956	0	0.0729927	0.00729927	0.0218978	0.0510949	0.0510949	0.0291971	0.0875912	0.0437956	0.0656934	0	0.0145985	0.118357	0.335749	0.15942	0.386473	0.722222	0.495169	0.1429	0.4048	0.0413	0.5478	0.279
Rv0833	0	8.76322	1.51374	4.61356	4.74545	4.13364	5.3864	1.25276	6.72266	5.21496	-0.942908	0.0145414	0.354318	1.15942	1.35604	PE_PGRS13	2250	1	0.170895	0	0.0160214	0.00267023	0.0293725	0.506008	0.00534045	0.0173565	0.00400534	0.0614152	0.00267023	0.0320427	0.0226969	0.00801068	0.00267023	0.0534045	0.0413885	0.0226969	0.00133511	0	0.0733333	0.308	0.113778	0.504889	0.812889	0.421778	0.1304	0.5802	0.038	0.2946	0.244
Rv0834c	1.91624	11.6065	1.59457	6.51553	6.45363	5.52405	7.34944	1.8254	6.76541	3.6283	0.313975	0	0.640291	0.95428	1.64202	PE_PGRS14	2649	0	0.190476	0	0.021542	0.00907029	0.0283447	0.419501	0.00793651	0.0283447	0.00226757	0.0566893	0.00907029	0.0362812	0.021542	0.0124717	0.00340136	0.0453515	0.0566893	0.0419501	0.00453515	0.00453515	0.10117	0.322386	0.12835	0.448094	0.770479	0.450736	0.1484	0.6125	0.06	0.2335	0.315
Rv0835	0	9.27077	0.744021	6.26781	6.32235	5.80512	6.71905	0.913922	6.7881	8.67949	-0.522773	0.00111857	-0.228732	0.972753	0.772995	lpqQ	645	1	0.11215	0.0327103	0.0654206	0.0514019	0.0373832	0.0607477	0.0233645	0.0654206	0.00934579	0.0560748	0.00934579	0.0140187	0.0700935	0.0280374	0.0654206	0.102804	0.0747664	0.088785	0.00934579	0.0233645	0.178295	0.310078	0.203101	0.308527	0.618605	0.513178	0.1823	0.4583	0.1183	0.4387	0.283
Rv0836c	0	10.4381	1.36821	3.99069	3.73636	2.95944	5.0384	2.07896	6.73513	3.69045	0.461051	0.00559284	0.133468	1.23474	1.13519	Rv0836c	654	0	0.142857	0.0138249	0.0967742	0.0184332	0.0322581	0.0737327	0.0599078	0.0138249	0.0138249	0.124424	0.0138249	0.0276498	0.0691244	0.0276498	0.0829493	0.0230415	0.0599078	0.0599078	0.0230415	0.0230415	0.169725	0.391437	0.148318	0.29052	0.681957	0.539755	0.102	0.5969	0.1364	0.3377	0.294
Rv0837c	0	11.209	1.18485	4.27364	4.1482	3.56535	4.79769	1.23234	6.75865	7.4372	1.24193	0.00223714	-0.0155842	1.20044	0.986142	Rv0837c	1029	0	0.128655	0.00292398	0.0672515	0.0467836	0.0116959	0.0877193	0.0380117	0.0350877	0.0116959	0.149123	0.0146199	0.0204678	0.0701754	0.0292398	0.0847953	0.0555556	0.0467836	0.0614035	0.0175439	0.0204678	0.173955	0.347911	0.173955	0.304179	0.652089	0.521866	0.1595	0.4751	0.163	0.3598	0.228
Rv0838	3.74584	7.87854	0.631617	5.86874	5.93959	5.60726	6.2416	0.634338	6.78975	4.13063	-0.591003	0	-0.377526	1.00914	0.624201	lpqR	771	1	0.144531	0.0273438	0.0585938	0.0351562	0.03125	0.0859375	0.0273438	0.015625	0.00390625	0.0664062	0.0234375	0.0195312	0.0742188	0.03125	0.0859375	0.0664062	0.046875	0.113281	0.0234375	0.0195312	0.13489	0.32166	0.184176	0.359274	0.680934	0.505837	0.1586	0.4405	0.096	0.4639	0.235
Rv0839	4.79533	10.4552	1.12495	7.16832	6.98377	6.31853	7.9379	1.61938	6.78358	2.45588	0.452752	0	0.19924	0.92571	1.20097	Rv0839	813	1	0.144444	0.0148148	0.0814815	0.0444444	0.0259259	0.0703704	0.037037	0.0333333	0.0111111	0.103704	0.00740741	0.0148148	0.0518519	0.0259259	0.0851852	0.0592593	0.0518519	0.0777778	0.037037	0.0222222	0.158672	0.323493	0.182042	0.335793	0.659287	0.505535	0.1519	0.4473	0.1359	0.4518	0.234
Rv0840c	2.87017	13.2144	1.33734	5.52482	5.31335	4.60727	6.1404	1.53313	6.76823	6.18707	1.27225	0	0.293114	1.04423	1.29484	pip	861	0	0.0944056	0.0174825	0.0559441	0.0734266	0.0524476	0.0734266	0.0314685	0.048951	0.00699301	0.0839161	0.034965	0.0244755	0.0559441	0.020979	0.0874126	0.0734266	0.0559441	0.0699301	0.0244755	0.013986	0.178862	0.291521	0.211382	0.318235	0.609756	0.502904	0.1867	0.444	0.1495	0.43	0.245
Rv0841	0	9.68743	2.32796	3.40289	3.05325	1.51097	5.3282	3.81723	6.52275	2.01527	0.300768	0.098434	1.0216	1.30636	2.02333	Rv0841	243	1	0.2	0.0125	0.0125	0	0	0.075	0.0625	0.05	0	0.075	0.05	0.0125	0.0875	0	0.0625	0.0875	0.05	0.125	0.0125	0.025	0.123457	0.329218	0.209877	0.337449	0.666667	0.539095	0.2105	0.3684	0.0758	0.4355	0.27
Rv0842	1.80895	9.94337	1.84152	5.16788	4.3311	3.95555	6.02415	2.0686	6.73769	2.86407	1.10141	0	0.751178	1.09034	1.7529	Rv0842	1293	1	0.172093	0.0255814	0.0255814	0.0116279	0.0232558	0.134884	0.0139535	0.0372093	0.00930233	0.123256	0.0232558	0.0139535	0.0465116	0.0186047	0.0581395	0.0488372	0.0465116	0.113953	0.027907	0.0255814	0.112916	0.285383	0.216551	0.385151	0.670534	0.501933	0.1735	0.3673	0.0876	0.4911	0.237
Rv0843	0	7.4059	0.992442	4.23339	3.99155	3.56107	4.91726	1.35619	6.76824	3.53119	0.51298	0.00111857	-0.212867	1.20531	0.78886	Rv0843	1005	1	0.146707	0.011976	0.0748503	0.0479042	0.0239521	0.101796	0.0239521	0.0419162	0.00898204	0.0928144	0.0149701	0.0179641	0.0479042	0.0449102	0.0928144	0.0299401	0.0538922	0.0898204	0.011976	0.0209581	0.172139	0.301493	0.18209	0.344279	0.645771	0.483582	0.2055	0.4178	0.1455	0.4134	0.266
Rv0844c	2.43764	9.86211	0.846407	7.52091	7.65681	7.22138	7.98804	0.766663	6.7888	8.5871	-1.73812	0	-0.0759091	0.922316	0.925817	narL	651	0	0.157407	0.00925926	0.0601852	0.0601852	0.00925926	0.0694444	0.0185185	0.037037	0.0324074	0.111111	0.0185185	0.0138889	0.0555556	0.0416667	0.0787037	0.0555556	0.0231481	0.125	0	0.0231481	0.159754	0.3149	0.162826	0.362519	0.677419	0.477727	0.0984	0.4918	0.082	0.5086	0.225
Rv0845	1.95099	7.74947	0.895411	5.42536	5.34385	4.85889	6.03401	1.17512	6.78159	3.83404	-0.276089	0	-0.160949	1.05636	0.840778	Rv0845	1278	1	0.124706	0.00941176	0.0423529	0.0470588	0.0305882	0.0870588	0.0211765	0.0517647	0.00941176	0.134118	0.0235294	0.00470588	0.0352941	0.0305882	0.0941176	0.0588235	0.0541176	0.112941	0.00941176	0.0188235	0.150235	0.283255	0.222222	0.344288	0.627543	0.505477	0.1813	0.3707	0.1341	0.4673	0.207
Rv0846c	2.54491	11.1579	1.38545	5.63824	5.32562	4.70046	6.43409	1.73363	6.76669	3.56766	0.823409	0	0.353785	1.03166	1.35551	Rv0846c	1515	0	0.107143	0.00396825	0.0654762	0.031746	0.0257937	0.109127	0.0357143	0.0555556	0.0238095	0.0753968	0.0337302	0.0376984	0.0813492	0.0218254	0.0515873	0.0376984	0.093254	0.0634921	0.0138889	0.031746	0.19934	0.355116	0.152475	0.293069	0.648185	0.507591	0.1224	0.5805	0.1082	0.3675	0.293
Rv0847	1.02882	14.441	2.18232	7.60996	7.41814	5.84407	8.91049	3.06642	6.75471	2.8711	0.442539	0	1.25982	0.9225	2.26155	lpqS	393	1	0.176923	0.0230769	0.0384615	0.0153846	0.0153846	0.0538462	0.0461538	0.0153846	0	0.1	0.0307692	0.0230769	0.107692	0.0230769	0.0692308	0.0461538	0.0769231	0.123077	0.0153846	0	0.13486	0.366412	0.170483	0.328244	0.694656	0.536896	0.1167	0.4167	0.1321	0.4519	0.272
Rv0848	1.76622	11.0298	1.67622	6.27787	6.23469	5.10405	7.17786	2.0738	6.75993	3.14261	0.36979	0	0.704298	0.971921	1.70602	cysK2	1119	1	0.107527	0.0107527	0.0564516	0.0403226	0.0188172	0.110215	0.0188172	0.0376344	0.0107527	0.077957	0.0241935	0.0349462	0.0806452	0.0322581	0.077957	0.0456989	0.0645161	0.0887097	0.0241935	0.0376344	0.177837	0.331546	0.16622	0.324397	0.655943	0.497766	0.1296	0.5031	0.1453	0.3927	0.225
Rv0849	0.641679	9.99573	1.49002	4.90776	4.6842	4.05408	5.71725	1.66317	6.74881	3.59713	0.408815	0	0.36591	1.12411	1.36764	Rv0849	1260	1	0.152745	0.00477327	0.0190931	0.0190931	0.0620525	0.105012	0.00477327	0.0572792	0.0071599	0.133652	0.0357995	0.0286396	0.0357995	0.0334129	0.0692124	0.0501193	0.0381862	0.102625	0.0143198	0.026253	0.139683	0.305556	0.222222	0.33254	0.638095	0.527778	0.1153	0.4611	0.1187	0.4569	0.243
Rv0851c	0	7.49156	0.741496	5.36798	5.37141	5.00674	5.80205	0.795309	6.78493	9.49595	-1.29455	0.00111857	-0.322209	1.0637	0.679518	Rv0851c	828	0	0.116364	0.0109091	0.0690909	0.0545455	0.0363636	0.12	0.0363636	0.0436364	0.00727273	0.0872727	0.0145455	0.0254545	0.0363636	0.0218182	0.08	0.0436364	0.0545455	0.116364	0.0145455	0.0109091	0.154589	0.311594	0.184783	0.349034	0.660628	0.496377	0.1592	0.5102	0.0926	0.4118	0.242
Rv0852	0	9.68198	0.903713	5.6075	5.66281	5.10442	6.13786	1.03345	6.78133	6.7987	-0.642144	0.00223714	-0.131197	1.03491	0.870529	Rv0852	639	1	0.136792	0	0.0707547	0.0471698	0.0613208	0.0660377	0.0283019	0.0613208	0.00943396	0.0613208	0.0283019	0.0188679	0.0518868	0.0283019	0.0754717	0.0613208	0.0424528	0.113208	0.0235849	0.0141509	0.159624	0.29421	0.215962	0.330203	0.624413	0.510172	0.1848	0.4457	0.1056	0.4662	0.277
Rv0853c	3.90173	7.67028	0.680811	5.98756	6.02217	5.54718	6.48036	0.933172	6.78916	2.53362	-0.193763	0	-0.31698	0.997791	0.684746	pdc	1683	0	0.121429	0.00535714	0.0553571	0.0482143	0.0285714	0.0857143	0.025	0.0446429	0.0107143	0.105357	0.0196429	0.0214286	0.0732143	0.0410714	0.0607143	0.0589286	0.0607143	0.0964286	0.0107143	0.0267857	0.1735	0.336304	0.16637	0.323827	0.660131	0.502674	0.0963	0.5123	0.1258	0.4439	0.249
Rv0854	4.46451	10.7789	0.841053	6.78364	6.7865	6.21083	7.27936	1.06853	6.78806	3.81658	0.313933	0	-0.0976588	0.938712	0.904068	Rv0854	444	1	0.0680272	0	0.0748299	0.0816327	0.0204082	0.0544218	0.00680272	0.0680272	0.0816327	0.0612245	0.0204082	0.00680272	0.047619	0.0612245	0.047619	0.0748299	0.0884354	0.102041	0.0204082	0.0136054	0.256757	0.274775	0.150901	0.317568	0.592342	0.425676	0.0926	0.537	0.1545	0.4779	0.255
Rv0855	0.670599	8.41376	0.777496	5.86995	5.92955	5.42764	6.33556	0.907928	6.78601	9.35593	-1.21944	0	-0.231529	1.00903	0.770197	far	1080	1	0.125348	0.0139276	0.0724234	0.0362117	0.0334262	0.111421	0.0139276	0.0389972	0.0194986	0.0947075	0.0334262	0.0167131	0.0752089	0.0334262	0.0668524	0.0445682	0.0529248	0.0807799	0.0139276	0.0222841	0.15463	0.315741	0.177778	0.351852	0.667593	0.493519	0.1415	0.4598	0.089	0.4906	0.288
Rv0856	3.82538	10.1327	0.820527	7.68335	7.69984	7.23594	8.23036	0.994413	6.78988	4.24418	-0.386675	0	-0.102337	0.922865	0.899389	Rv0856	405	1	0.104478	0.00746269	0.0820896	0.0597015	0.0223881	0.0895522	0.0522388	0.0522388	0.0597015	0.0671642	0.00746269	0.00746269	0.0597015	0.0522388	0.0447761	0.0298507	0.0298507	0.11194	0.0298507	0.0298507	0.214815	0.269136	0.17284	0.34321	0.612346	0.441975	0.1604	0.4434	0.1569	0.5158	0.279
Rv0857	4.93923	9.82203	0.724994	7.59328	7.60893	7.09365	8.09346	0.999804	6.7911	3.37719	-0.21792	0	-0.197448	0.922441	0.804279	Rv0857	474	1	0.10828	0	0.0573248	0.0700637	0.0191083	0.0509554	0.044586	0.0509554	0.0509554	0.0573248	0.0127389	0.0254777	0.0509554	0.0254777	0.0828025	0.044586	0.0573248	0.140127	0.0318471	0.0191083	0.208861	0.28903	0.175105	0.327004	0.616034	0.464135	0.1406	0.4453	0.176	0.4615	0.24
Rv0858c	0.574168	7.80903	0.921487	5.46286	5.66856	5.10193	6.03169	0.929761	6.77907	8.11716	-1.81489	0	-0.130198	1.05168	0.871529	dapC	1194	0	0.171285	0.0151134	0.0604534	0.0503778	0.0377834	0.0755668	0.0201511	0.0428212	0.0151134	0.0881612	0.0176322	0.0201511	0.0680101	0.0251889	0.070529	0.0428212	0.0579345	0.0831234	0.0100756	0.0277078	0.167504	0.346734	0.153266	0.332496	0.679229	0.5	0.0743	0.5229	0.1338	0.4545	0.27
Rv0859	6.21724	11.741	0.848161	8.77476	8.78383	8.17541	9.18314	1.00773	6.79108	3.73714	0.453684	0	-0.097723	0.945884	0.904003	Rv0859	1212	1	0.114144	0.00744417	0.0719603	0.0521092	0.0248139	0.116625	0.0198511	0.057072	0.0421836	0.0992556	0.0322581	0.0322581	0.0421836	0.0272953	0.0521092	0.0545906	0.0471464	0.0868486	0.00744417	0.0124069	0.180693	0.335809	0.148515	0.334983	0.670792	0.484323	0.0533	0.645	0.0627	0.4426	0.375
Rv0860	6.18886	11.6582	0.853078	8.9009	8.915	8.30508	9.36814	1.06306	6.79114	3.4592	0.339166	0	-0.0958737	0.948952	0.905853	fadB	2163	1	0.123611	0.00277778	0.0513889	0.0694444	0.0416667	0.111111	0.00833333	0.0569444	0.0625	0.0819444	0.0263889	0.0236111	0.0555556	0.0319444	0.0430556	0.0541667	0.0569444	0.0736111	0.00694444	0.0180556	0.182617	0.311142	0.159501	0.346741	0.657883	0.470643	0.0934	0.564	0.0474	0.5236	0.319
Rv0861c	4.45946	9.82007	0.626861	7.07159	7.0824	6.72267	7.45417	0.731504	6.79174	5.18978	-0.156656	0	-0.300982	0.927843	0.700744	ercc3	1629	0	0.123616	0.00553506	0.0627306	0.0756458	0.0221402	0.0738007	0.0239852	0.0553506	0.0350554	0.101476	0.0166052	0.0110701	0.0424354	0.0369004	0.0830258	0.0461255	0.0535055	0.0848708	0.0147601	0.0313653	0.189687	0.315531	0.165746	0.329036	0.644567	0.481277	0.1121	0.5224	0.1293	0.4526	0.284
Rv0862c	2.04349	8.1445	0.699371	5.67293	5.78766	5.46296	6.04168	0.578725	6.78754	7.69565	-1.19489	0	-0.328783	1.02815	0.672944	Rv0862c	2271	0	0.166667	0.00132275	0.0714286	0.0410053	0.0185185	0.0714286	0.0145503	0.0330688	0.0145503	0.12963	0.0132275	0.00529101	0.0873016	0.0343915	0.0886243	0.047619	0.0582011	0.0846561	0.0119048	0.00661376	0.151475	0.356671	0.161162	0.330691	0.687362	0.517834	0.1181	0.4514	0.1451	0.4205	0.22
Rv0863	5.73021	11.1588	0.74116	9.21139	9.36779	8.83387	9.66356	0.829693	6.79238	4.42967	-0.820395	0	-0.21634	0.9575	0.785386	Rv0863	282	1	0.0757576	0	0.121212	0.0454545	0.030303	0.0606061	0.0454545	0.0454545	0.030303	0.0606061	0.0151515	0.0151515	0.106061	0	0.0606061	0.0454545	0.106061	0.0909091	0.0151515	0.030303	0.198582	0.29078	0.202128	0.308511	0.599291	0.492908	0.1833	0.45	0.1633	0.413	0.345
Rv0864	5.62012	10.7207	0.671979	9.2726	9.39535	9.02918	9.65182	0.622639	6.79294	8.97601	-1.83075	0	-0.287363	0.959341	0.714364	moaC2	504	1	0.149701	0.00598802	0.0778443	0.0419162	0.00598802	0.0898204	0.0239521	0.0598802	0.0359281	0.0898204	0.0299401	0	0.0179641	0.0239521	0.0838323	0.0538922	0.107784	0.0838323	0.00598802	0.011976	0.19246	0.305556	0.156746	0.345238	0.650794	0.462302	0.1389	0.4583	0.1143	0.4538	0.249
Rv0865	3.19894	10.0554	0.731292	7.47359	7.50962	7.09854	7.91182	0.813279	6.79068	7.85577	-1.05175	0	-0.191071	0.922363	0.810655	mog	483	1	0.1	0.0125	0.075	0.025	0.00625	0.1375	0.03125	0.06875	0.00625	0.075	0.00625	0.01875	0.06875	0.025	0.05625	0.075	0.0625	0.13125	0.00625	0.0125	0.151139	0.318841	0.186335	0.343685	0.662526	0.505176	0.1812	0.443	0.0977	0.4262	0.232
Rv0866	2.64399	10.1554	0.797251	7.01304	7.06708	6.553	7.59784	1.04485	6.78883	7.12662	-1.12645	0	-0.132202	0.929453	0.869524	moaE2	426	1	0.170213	0.0070922	0.0496454	0.0780142	0.035461	0.0851064	0.0496454	0.035461	0.0141844	0.0851064	0.0141844	0	0.0212766	0.035461	0.0780142	0.0567376	0.035461	0.12766	0.0141844	0.0070922	0.140845	0.279343	0.187793	0.392019	0.671362	0.467136	0.1681	0.395	0.069	0.5586	0.244
Rv0867c	2.84824	12.0122	1.33528	8.27419	8.35824	7.52972	9.20003	1.67031	6.78221	3.31091	-0.376888	0	0.403098	0.932179	1.40482	rpfA	1224	0	0.230958	0.00737101	0.0687961	0.04914	0.00737101	0.0786241	0.004914	0.017199	0.00982801	0.0933661	0.00737101	0.029484	0.194103	0.036855	0.022113	0.031941	0.039312	0.0515971	0.012285	0.00737101	0.156863	0.424837	0.113562	0.304739	0.729575	0.538399	0.1083	0.5083	0.1753	0.3402	0.254
Rv0868c	3.86574	10.357	0.877042	7.64439	7.77678	7.18677	8.19333	1.00655	6.78891	4.04899	-0.629389	0	-0.0456083	0.92265	0.956118	moaD2	279	0	0.163043	0.0108696	0.0869565	0.0326087	0.0217391	0.0978261	0	0.0434783	0.0108696	0.0869565	0.0108696	0	0.0217391	0.0217391	0.0869565	0.0869565	0.0652174	0.130435	0	0.0217391	0.150538	0.329749	0.193548	0.326165	0.655914	0.523297	0.1395	0.5116	0.1519	0.32	0.195
Rv0869c	3.25646	10.3883	0.871114	7.42641	7.41977	6.95112	7.91932	0.968205	6.78856	6.27935	-0.547671	0	-0.0514115	0.922526	0.950315	moaA2	1083	0	0.130556	0.0194444	0.0722222	0.0388889	0.025	0.0805556	0.025	0.0388889	0.00833333	0.122222	0.0166667	0.025	0.0666667	0.0138889	0.119444	0.0472222	0.0638889	0.0666667	0.0138889	0.00555556	0.153278	0.357341	0.149584	0.339797	0.697138	0.506925	0.0856	0.5168	0.0976	0.4542	0.227
Rv0870c	6.13801	10.4275	0.716322	8.46183	8.50143	8.0525	8.87765	0.82515	6.79209	2.98072	-0.243071	0	-0.221349	0.937671	0.780377	Rv0870c	390	0	0.116279	0.00775194	0.00775194	0.00775194	0.0465116	0.100775	0.00775194	0.116279	0.0232558	0.193798	0.0155039	0.0310078	0.0542636	0.00775194	0.0232558	0.0387597	0.0465116	0.100775	0.0387597	0.0155039	0.14359	0.3	0.238462	0.317949	0.617949	0.538462	0.0684	0.453	0.1028	0.5435	0.253
Rv0871	4.81668	11.6871	0.766436	8.78437	8.92659	8.56763	9.16996	0.602331	6.79168	9.10658	-1.49505	0	-0.179673	0.946109	0.822054	cspB	408	1	0.0814815	0	0.0444444	0.103704	0.0296296	0.0888889	0.0222222	0.0222222	0.0518519	0.0814815	0.0222222	0	0.0888889	0.0296296	0.111111	0.0740741	0.037037	0.0814815	0.00740741	0.0222222	0.171569	0.308824	0.154412	0.365196	0.67402	0.463235	0.1121	0.486	0.0776	0.5221	0.235
Rv0872c	3.013	12.1787	1.2238	7.56045	7.5666	6.73398	8.25884	1.52486	6.78245	4.25217	0.13046	0	0.301437	0.922358	1.30316	PE_PGRS15	1821	0	0.169967	0	0.0280528	0.0165017	0.0132013	0.40264	0.00330033	0.0214521	0.00660066	0.0445545	0.00990099	0.0577558	0.029703	0.0264026	0.00825083	0.0561056	0.0577558	0.0346535	0.00165017	0.0115512	0.135091	0.308622	0.114223	0.442065	0.750686	0.422845	0.1582	0.58	0.0811	0.2631	0.308
Rv0873	6.14331	9.74165	0.556453	8.10742	8.14939	7.78311	8.41326	0.630149	6.79333	3.64499	-0.274115	0	-0.371471	0.927923	0.630256	fadE10	1953	1	0.133846	0.00769231	0.0430769	0.0861538	0.0353846	0.0830769	0.0123077	0.0446154	0.0384615	0.104615	0.0184615	0.0230769	0.0415385	0.0384615	0.0769231	0.0630769	0.0476923	0.0676923	0.0169231	0.0169231	0.192524	0.290835	0.177163	0.339478	0.630312	0.467998	0.1459	0.4491	0.149	0.4665	0.25
Rv0874c	0.84537	9.31591	1.14611	5.65272	5.62047	4.78384	6.51553	1.73168	6.77428	4.01665	-0.0627052	0	0.115935	1.03018	1.11766	Rv0874c	1161	0	0.124352	0.0103627	0.0699482	0.0518135	0.0336788	0.126943	0.0233161	0.0544041	0.00259067	0.106218	0.0181347	0.0103627	0.0569948	0.0310881	0.0829016	0.0388601	0.0518135	0.0932642	0.00259067	0.0103627	0.133506	0.338501	0.161929	0.366064	0.704565	0.500431	0.0896	0.5202	0.066	0.4949	0.259
Rv0875c	2.29886	9.22331	0.773903	6.9592	6.99128	6.63356	7.3588	0.725231	6.78921	7.08685	-0.881104	0	-0.157275	0.931178	0.844451	Rv0875c	489	0	0.0679012	0.0123457	0.0493827	0.037037	0.0123457	0.0679012	0.0308642	0.0432099	0.00617284	0.12963	0.00617284	0.0123457	0.0864198	0.0617284	0.0740741	0.0555556	0.0679012	0.12963	0.0185185	0.0308642	0.157464	0.325153	0.194274	0.323108	0.648262	0.519427	0.1197	0.4366	0.1111	0.5078	0.245
Rv0876c	5.4882	9.47757	0.5575	7.28524	7.23336	6.9669	7.53734	0.57044	6.7928	4.22433	0.378902	0	-0.366329	0.923829	0.635398	Rv0876c	1647	0	0.144161	0.00729927	0.0218978	0.0328467	0.0364964	0.0930657	0.0127737	0.0419708	0.0127737	0.113139	0.0291971	0.0291971	0.0638686	0.020073	0.0839416	0.0675182	0.0656934	0.0912409	0.0145985	0.0182482	0.155434	0.326655	0.185792	0.332119	0.658774	0.512447	0.1127	0.4631	0.1209	0.4352	0.256
Rv0877	4.79509	11.2913	0.645395	8.28899	8.24152	7.9179	8.61026	0.692364	6.79266	6.54395	0.083822	0	-0.287202	0.932597	0.714524	Rv0877	789	1	0.145038	0.0152672	0.0801527	0.0534351	0.019084	0.122137	0.0229008	0.0229008	0.0114504	0.0648855	0.0152672	0.00763359	0.0725191	0.0305344	0.0534351	0.0648855	0.0458015	0.0877863	0.0305344	0.0343511	0.152091	0.295311	0.17237	0.380228	0.675539	0.467681	0.1858	0.4292	0.0931	0.4697	0.276
Rv0878c	1.87524	7.91295	1.11537	5.28416	5.1887	4.47512	6.20244	1.72732	6.77294	2.48568	-0.0284024	0	0.040631	1.07474	1.04236	PPE13	1332	0	0.173815	0.00225734	0.0225734	0.020316	0.0406321	0.164786	0.00677201	0.0361174	0.00677201	0.0722348	0.013544	0.106095	0.0474041	0.0293454	0.0293454	0.0880361	0.0541761	0.0519187	0.020316	0.013544	0.186937	0.298048	0.168919	0.346096	0.644144	0.466967	0.1439	0.4442	0.137	0.4404	0.264
Rv0879c	1.99518	10.3194	1.04927	7.46312	7.63261	7.08984	8.0547	0.964856	6.78475	7.66452	-1.54958	0	0.126885	0.922389	1.12861	Rv0879c	276	0	0.175824	0	0.010989	0.043956	0.021978	0.0879121	0	0.032967	0.010989	0.131868	0.010989	0.010989	0.0989011	0.032967	0.0549451	0.032967	0.0549451	0.131868	0.043956	0.010989	0.148551	0.34058	0.173913	0.336957	0.677536	0.514493	0.1154	0.4615	0.1852	0.3333	0.224
Rv0880	1.30995	8.33968	0.92436	5.77253	5.89594	5.285	6.38562	1.10062	6.78196	4.6153	-0.861352	0	-0.0941101	1.01847	0.907616	Rv0880	432	1	0.13986	0	0.0629371	0.0559441	0.013986	0.034965	0.00699301	0.027972	0.00699301	0.146853	0.041958	0.020979	0.0559441	0.027972	0.125874	0.118881	0.034965	0.0699301	0.00699301	0	0.148148	0.31713	0.18287	0.351852	0.668981	0.5	0.1129	0.379	0.1066	0.5339	0.186
Rv0881	1.73388	7.21832	0.855263	5.11509	5.22891	4.62775	5.68797	1.06022	6.78089	3.74179	-0.68555	0	-0.242152	1.09742	0.759574	Rv0881	867	1	0.145833	0.0138889	0.0729167	0.0416667	0.0277778	0.0902778	0.0277778	0.03125	0.0138889	0.107639	0.0243056	0.0243056	0.0590278	0.0138889	0.09375	0.0451389	0.0486111	0.0972222	0.00347222	0.0173611	0.155709	0.311419	0.181084	0.351788	0.663206	0.492503	0.1494	0.4253	0.1184	0.4749	0.26
Rv0882	0	8.36278	1.50279	5.07376	5.22089	4.45874	5.98881	1.53006	6.73809	4.97059	-1.08036	0.0190157	0.399881	1.10291	1.40161	Rv0882	285	1	0.180851	0	0.0319149	0	0.0212766	0.117021	0.0106383	0.0319149	0	0.170213	0.0106383	0.0212766	0.0425532	0.0212766	0.0531915	0.0212766	0.0425532	0.170213	0.0531915	0	0.0877193	0.301754	0.210526	0.4	0.701754	0.512281	0.092	0.4483	0.0617	0.4744	0.237
Rv0883c	4.15465	9.79805	0.842809	7.91757	8.05422	7.53826	8.43572	0.897462	6.78976	5.17707	-1.10421	0	-0.0819375	0.924746	0.919789	Rv0883c	762	0	0.150198	0.00395257	0.0711462	0.055336	0.0237154	0.0592885	0.0237154	0.0434783	0.0237154	0.0948617	0.00790514	0.0316206	0.0790514	0.0434783	0.0909091	0.0513834	0.0513834	0.0750988	0.0197628	0	0.173228	0.367454	0.14042	0.318898	0.686352	0.507874	0.0977	0.5488	0.1159	0.4235	0.274
Rv0884c	2.67084	9.5317	0.648528	7.56029	7.51384	7.21676	7.9448	0.728044	6.79179	12.5887	-1.46264	0	-0.273829	0.922357	0.727897	serC	1131	0	0.125	0.00265957	0.0718085	0.0478723	0.037234	0.0797872	0.0106383	0.0505319	0.0292553	0.0904255	0.00797872	0.0292553	0.0664894	0.0319149	0.0531915	0.0664894	0.0718085	0.0851064	0.0212766	0.0212766	0.17153	0.335986	0.170645	0.321839	0.657825	0.506631	0.1019	0.5463	0.0767	0.4698	0.283
Rv0885	4.41452	12.9302	1.36296	8.17927	8.0083	7.27159	9.12879	1.8572	6.78187	3.07768	0.296504	0	0.433326	0.929635	1.43505	Rv0885	1023	1	0.0764706	0.0147059	0.0470588	0.0764706	0.0441176	0.0441176	0.0323529	0.05	0.0294118	0.0852941	0.0470588	0.0352941	0.0764706	0.0264706	0.105882	0.05	0.0323529	0.0676471	0.0323529	0.0264706	0.182796	0.307918	0.182796	0.326491	0.634409	0.490714	0.0784	0.5037	0.102	0.5789	0.251
Rv0886	3.16341	10.4223	1.34514	5.92101	5.82863	4.87563	6.85682	1.98119	6.77013	2.56285	0.372097	0	0.341026	1.00412	1.34275	fprB	1728	1	0.126957	0.0191304	0.0678261	0.0365217	0.026087	0.0834783	0.026087	0.0417391	0.0208696	0.0991304	0.0104348	0.0295652	0.08	0.0330435	0.0817391	0.0347826	0.0591304	0.10087	0.00521739	0.0173913	0.156829	0.337963	0.165509	0.339699	0.677662	0.503472	0.1226	0.4689	0.0828	0.5149	0.241
Rv0887c	0	9.27314	1.11413	4.74106	4.6766	4.07801	5.42799	1.34998	6.76457	5.03093	-0.262508	0.00671141	-0.02997	1.1441	0.971756	Rv0887c	459	0	0.111842	0.00657895	0.0921053	0.0328947	0.0328947	0.0986842	0.0328947	0.0394737	0.0263158	0.0789474	0.0394737	0.0328947	0.0592105	0.0394737	0.0328947	0.0460526	0.0592105	0.111842	0.0131579	0.0131579	0.187364	0.335512	0.172113	0.305011	0.640523	0.507625	0.1008	0.5969	0.125	0.3774	0.267
Rv0888	1.20973	10.4852	1.64514	6.58112	6.97647	5.5629	7.82179	2.25889	6.76139	3.01093	-0.647621	0	0.695062	0.950077	1.69679	Rv0888	1473	1	0.0897959	0.0122449	0.0673469	0.0265306	0.0489796	0.0959184	0.022449	0.0367347	0.022449	0.0714286	0.0122449	0.0489796	0.077551	0.044898	0.0367347	0.0714286	0.077551	0.0979592	0.00612245	0.0326531	0.192804	0.337407	0.175153	0.294637	0.632043	0.512559	0.1172	0.5678	0.1008	0.4183	0.288
Rv0889c	3.37825	9.91597	0.700299	7.5706	7.63609	7.31661	7.89911	0.582503	6.79123	8.51232	-1.04298	0	-0.22208	0.922379	0.779647	citA	1122	0	0.147453	0.0080429	0.0616622	0.0616622	0.0294906	0.0884718	0.0160858	0.0428954	0.0134048	0.075067	0.0294906	0.0134048	0.0697051	0.0268097	0.0884718	0.0455764	0.0428954	0.0991957	0.0187668	0.0214477	0.157754	0.327986	0.155971	0.358289	0.686275	0.483957	0.0946	0.4953	0.1237	0.4629	0.28
Rv0890c	2.24422	8.28305	0.98992	5.8889	6.04629	5.52104	6.5082	0.987161	6.78041	4.4364	-0.996241	0	-0.0172793	1.0072	0.984447	Rv0890c	2649	0	0.176871	0.0192744	0.0623583	0.0555556	0.0226757	0.0748299	0.0204082	0.0419501	0.0124717	0.113379	0.0192744	0.0192744	0.031746	0.0385488	0.0873016	0.053288	0.0555556	0.0612245	0.015873	0.0181406	0.175538	0.316723	0.177048	0.330691	0.647414	0.493771	0.157	0.4538	0.1622	0.4077	0.245
Rv0891c	0	8.68048	1.32567	6.43321	6.77414	5.87039	7.30271	1.43232	6.77004	5.76716	-1.4084	0.00559284	0.365723	0.959948	1.36745	Rv0891c	858	0	0.105263	0.0245614	0.0631579	0.0385965	0.0245614	0.0631579	0.0421053	0.045614	0.0140351	0.119298	0.0140351	0.0210526	0.0807018	0.0315789	0.0947368	0.0526316	0.0666667	0.0736842	0.0105263	0.0140351	0.193473	0.319347	0.206294	0.280886	0.600233	0.525641	0.2275	0.3922	0.2089	0.3491	0.219
Rv0892	1.97815	9.0799	1.16772	6.29647	6.35733	5.68876	7.04096	1.35221	6.77762	3.83061	-0.400256	0	0.197327	0.970397	1.19905	Rv0892	1488	1	0.0949495	0.0181818	0.0606061	0.0343434	0.0444444	0.0868687	0.0363636	0.0424242	0.0222222	0.0747475	0.0262626	0.0222222	0.0606061	0.0262626	0.0888889	0.0505051	0.0686869	0.0868687	0.0242424	0.030303	0.195565	0.282258	0.21707	0.305108	0.587366	0.499328	0.2354	0.3893	0.1973	0.3779	0.249
Rv0893c	0	8.05453	1.26382	5.10996	5.06101	4.38157	5.93482	1.55325	6.76231	3.4098	-0.304951	0.0033557	0.165724	1.0981	1.16745	Rv0893c	978	0	0.150769	0.00923077	0.0738462	0.0676923	0.0553846	0.0615385	0.0123077	0.0338462	0.0184615	0.0769231	0.0123077	0.0215385	0.0492308	0.0338462	0.0923077	0.0461538	0.0676923	0.0676923	0.0246154	0.0246154	0.198364	0.298569	0.195297	0.307771	0.606339	0.493865	0.1934	0.4562	0.2048	0.3529	0.213
Rv0894	0	7.72187	1.52954	3.98223	3.59257	2.9054	4.86274	1.95734	6.72221	2.63861	0.596924	0.00447427	0.293772	1.23577	1.2955	Rv0894	1182	1	0.111959	0.0203562	0.0661578	0.0483461	0.0330789	0.0763359	0.0229008	0.0407125	0.0203562	0.127226	0.0127226	0.0305344	0.0381679	0.0305344	0.0916031	0.0585242	0.0559796	0.086514	0.00763359	0.0203562	0.174281	0.275804	0.218274	0.331641	0.607445	0.494078	0.2023	0.3728	0.1262	0.5017	0.208
Rv0895	0.706194	7.56958	0.978594	3.67307	3.52149	3.05217	4.25706	1.20489	6.76097	4.57482	0.7596	0	-0.294795	1.27339	0.706932	Rv0895	1518	1	0.146535	0.0158416	0.0376238	0.0336634	0.0118812	0.0851485	0.0237624	0.0316832	0.0138614	0.124752	0.0257426	0.019802	0.0752475	0.039604	0.0950495	0.0554455	0.0514851	0.0811881	0.019802	0.0118812	0.156785	0.325428	0.170619	0.347167	0.672596	0.496047	0.1344	0.4009	0.1374	0.468	0.238
Rv0896	5.40534	11.6936	0.825	9.59204	9.76262	9.31165	10.03	0.718315	6.79184	6.18132	-1.26568	0	-0.14471	0.96971	0.857016	gltA2	1296	1	0.0928074	0.00464037	0.0788863	0.0533643	0.0464037	0.0858469	0.025522	0.0580046	0.0394432	0.109049	0.0208817	0.0301624	0.0464037	0.0301624	0.062645	0.0440835	0.062645	0.0533643	0.00696056	0.0487239	0.195988	0.332562	0.179784	0.291667	0.624228	0.512346	0.109	0.6049	0.0752	0.4558	0.303
Rv0897c	2.47388	8.18267	0.81022	6.32789	6.36557	5.78483	6.87399	1.08916	6.78716	4.91808	-0.584435	0	-0.157657	0.967877	0.844069	Rv0897c	1608	0	0.151402	0.0130841	0.0579439	0.035514	0.0280374	0.102804	0.035514	0.035514	0.00560748	0.106542	0.0168224	0.0168224	0.0560748	0.0280374	0.0766355	0.0579439	0.0616822	0.082243	0.0130841	0.0186916	0.152985	0.343905	0.164179	0.33893	0.682836	0.508085	0.1037	0.5	0.1192	0.4328	0.261
Rv0898c	2.9876	11.0702	0.869004	8.54797	8.49125	8.1462	9.02168	0.875482	6.79014	12.0358	-1.40251	0	-0.0711706	0.940174	0.930556	Rv0898c	264	0	0.0804598	0.0114943	0.0689655	0.114943	0	0.091954	0.0229885	0.045977	0.0344828	0.103448	0.0114943	0	0.0344828	0.091954	0.137931	0.0344828	0.045977	0.045977	0.0114943	0.0114943	0.223485	0.310606	0.113636	0.352273	0.662879	0.424242	0.0781	0.5469	0.1867	0.4366	0.303
Rv0899	4.75994	8.58095	0.54969	6.37609	6.38768	6.05102	6.68629	0.635262	6.79199	4.23748	0.122398	0	-0.414462	0.964151	0.587265	arfA	981	1	0.128834	0.00613497	0.0552147	0.0306748	0.0214724	0.095092	0.00920245	0.0674847	0.0337423	0.0766871	0.00920245	0.0460123	0.0828221	0.0214724	0.0521472	0.0736196	0.0828221	0.0858896	0.00613497	0.0153374	0.201835	0.316004	0.190622	0.291539	0.607543	0.506626	0.2075	0.449	0.1434	0.36	0.27
Rv0900	0	8.07953	0.953167	6.17645	6.38828	5.88834	6.72398	0.835648	6.78154	8.96506	-1.94667	0.00223714	-0.0273847	0.980552	0.974342	arfB	153	1	0.2	0.02	0.04	0.06	0.04	0.08	0	0.04	0.02	0.08	0.02	0	0.02	0.04	0.04	0.1	0.04	0.1	0.04	0.02	0.143791	0.261438	0.222222	0.372549	0.633987	0.48366	0.2439	0.3659	0.0976	0.4615	0.316
Rv0901	3.26929	8.7469	0.546004	6.81628	6.85423	6.58554	7.13169	0.546151	6.79236	8.19778	-1.27065	0	-0.391085	0.93709	0.610641	arfC	528	1	0.131429	0	0.0285714	0.0685714	0.0228571	0.0742857	0.0171429	0.0171429	0.0628571	0.0457143	0.0171429	0	0.108571	0.0285714	0.0685714	0.0742857	0.0857143	0.0914286	0.0285714	0.0285714	0.181818	0.304924	0.143939	0.369318	0.674242	0.448864	0.1223	0.3597	0.1067	0.5714	0.246
Rv0902c	1.69415	9.34611	0.713421	7.19827	7.23342	6.93734	7.52671	0.589374	6.79019	17.8474	-2.22936	0	-0.211743	0.925164	0.789984	prrB	1341	0	0.127803	0.0044843	0.0650224	0.0560538	0.0224215	0.0695067	0.0179372	0.0605381	0.0156951	0.103139	0.00896861	0.0336323	0.0515695	0.0313901	0.0896861	0.0672646	0.0627803	0.0941704	0.00672646	0.0112108	0.158837	0.351976	0.155854	0.333333	0.685309	0.50783	0.0712	0.5496	0.0595	0.5044	0.287
Rv0903c	2.86629	10.7453	0.755792	8.29806	8.30579	7.93256	8.72352	0.790963	6.79126	12.8716	-1.51059	0	-0.177063	0.932855	0.824663	prrA	711	0	0.105932	0.00423729	0.0932203	0.0508475	0.0254237	0.0847458	0.00847458	0.0211864	0.0211864	0.127119	0.0211864	0.0211864	0.0338983	0.00847458	0.0932203	0.059322	0.0550847	0.148305	0.00423729	0.0127119	0.158931	0.316456	0.172996	0.351617	0.668073	0.489451	0.0664	0.5213	0.1257	0.4409	0.253
Rv0904c	2.19359	8.60107	0.84156	5.3048	5.34018	4.81274	5.82654	1.0138	6.78278	4.37772	-0.146445	0	-0.230438	1.072	0.771289	accD3	1488	0	0.161616	0.00606061	0.0505051	0.0505051	0.0222222	0.0969697	0.020202	0.040404	0.00606061	0.125253	0.0121212	0.00606061	0.0747475	0.0363636	0.0848485	0.0484848	0.0545455	0.0808081	0.00808081	0.0141414	0.147849	0.34207	0.15793	0.352151	0.69422	0.5	0.0932	0.4386	0.1405	0.4717	0.197
Rv0905	4.39781	10.2259	0.812338	8.24821	8.26027	7.75452	8.82468	1.07016	6.79075	3.95003	-0.478132	0	-0.11912	0.931457	0.882607	echA6	732	1	0.18107	0.00823045	0.0576132	0.0576132	0.0288066	0.0781893	0.0205761	0.0617284	0.037037	0.102881	0.0288066	0.0246914	0.0452675	0.0534979	0.0658436	0.0411523	0.037037	0.0452675	0.0164609	0.00823045	0.191257	0.322404	0.161202	0.325137	0.647541	0.483607	0.1378	0.5153	0.1224	0.442	0.285
Rv0906	2.91987	9.47074	0.863843	7.52314	7.44733	7.03883	8.13793	1.09911	6.78882	5.43041	-0.772459	0	-0.058474	0.922317	0.943252	Rv0906	1119	1	0.120968	0.00537634	0.0645161	0.0349462	0.0295699	0.0725806	0.0456989	0.0295699	0.00268817	0.107527	0.016129	0.0215054	0.0887097	0.0241935	0.0752688	0.061828	0.0510753	0.094086	0.0349462	0.0188172	0.142985	0.345845	0.172475	0.338695	0.68454	0.51832	0.1152	0.4727	0.0775	0.5018	0.241
Rv0907	2.73207	8.16121	0.776697	6.68645	6.76938	6.39552	7.18279	0.787274	6.78854	5.50276	-1.23763	0	-0.167179	0.943876	0.834548	Rv0907	1599	1	0.114662	0.0037594	0.0733083	0.0300752	0.0338346	0.101504	0.0263158	0.0263158	0.0281955	0.0864662	0.0131579	0.0394737	0.0620301	0.0319549	0.0488722	0.0695489	0.0676692	0.0864662	0.0150376	0.0413534	0.186366	0.318324	0.179487	0.315822	0.634146	0.497811	0.134	0.4872	0.1219	0.4562	0.273
Rv0908	2.65174	8.07585	0.965825	6.48262	6.70487	6.12	7.14318	1.02317	6.78352	5.25121	-1.46749	0	0.00933314	0.956492	1.01106	ctpE	2394	1	0.136763	0.00501882	0.04266	0.0501882	0.0288582	0.0803011	0.0125471	0.0577164	0.0238394	0.110414	0.0200753	0.0276035	0.0401506	0.0363864	0.0652447	0.055207	0.0577164	0.117942	0.0150565	0.0163112	0.16792	0.292398	0.196742	0.342941	0.635338	0.48914	0.1439	0.442	0.0965	0.4959	0.263
Rv0909	6.18642	13.3176	0.973667	9.20394	9.25426	8.67711	9.71452	1.03741	6.79012	4.57273	0.225727	0	0.0163876	0.957279	1.01811	Rv0909	180	1	0.0847458	0	0.101695	0.0508475	0.0169492	0.0677966	0.0338983	0.0508475	0.0847458	0.0677966	0.0338983	0.0847458	0	0.0847458	0	0.0847458	0.0338983	0.101695	0	0.0169492	0.294444	0.266667	0.138889	0.3	0.566667	0.405556	0.0909	0.6364	0.119	0.5128	0.388
Rv0910	4.92373	10.241	0.762879	8.39091	8.44917	7.89782	8.98271	1.08489	6.79146	4.31239	-0.720421	0	-0.172689	0.935568	0.829038	Rv0910	435	1	0.0763889	0	0.0347222	0.0694444	0.0208333	0.0972222	0.0277778	0.0555556	0.0763889	0.0902778	0.0347222	0.0208333	0.0694444	0.00694444	0.0486111	0.0555556	0.0416667	0.125	0.0277778	0.0208333	0.202299	0.296552	0.177011	0.324138	0.62069	0.473563	0.0973	0.5575	0.1282	0.422	0.289
Rv0911	3.37587	8.58414	0.76894	6.58188	6.65453	6.17175	7.16611	0.994352	6.78854	4.93569	-0.965813	0	-0.181091	0.950031	0.820636	Rv0911	774	1	0.108949	0.0194553	0.077821	0.0428016	0.0583658	0.11284	0.0194553	0.0311284	0.0116732	0.0622568	0.0233463	0.0233463	0.0622568	0.0389105	0.0389105	0.0700389	0.0622568	0.07393	0.0311284	0.0311284	0.162791	0.31137	0.202842	0.322997	0.634367	0.514212	0.1682	0.5318	0.0973	0.4068	0.302
Rv0912	0	8.09638	1.06052	5.96545	5.95278	5.33982	6.58405	1.24423	6.77817	5.28064	-0.727553	0.00223714	0.0606353	0.999882	1.06236	Rv0912	450	1	0.127517	0.0134228	0	0.0201342	0.0134228	0.134228	0.0201342	0.033557	0.0134228	0.134228	0.0201342	0.0201342	0.0469799	0.00671141	0.0604027	0.0872483	0.0536913	0.127517	0.0402685	0.0268456	0.108889	0.313333	0.215556	0.362222	0.675556	0.528889	0.1493	0.4328	0.0714	0.438	0.223
Rv0913c	1.9836	9.10844	0.941365	6.41793	6.49635	5.89205	7.08021	1.18816	6.78436	4.4835	-0.702084	0	-0.019685	0.96105	0.982041	Rv0913c	1509	0	0.0776892	0.00796813	0.0876494	0.059761	0.0537849	0.0876494	0.0358566	0.0318725	0.0258964	0.0896414	0.0159363	0.0338645	0.0677291	0.0179283	0.063745	0.0478088	0.061753	0.059761	0.0258964	0.0478088	0.201458	0.312127	0.189529	0.296885	0.609013	0.501657	0.1702	0.5198	0.1441	0.4079	0.316
Rv0914c	3.22839	8.70105	0.649235	6.63848	6.64628	6.26637	7.02415	0.757785	6.79084	4.44401	-0.339266	0	-0.297384	0.946619	0.704342	Rv0914c	1239	0	0.135922	0.00970874	0.0898058	0.0461165	0.026699	0.11165	0.0291262	0.0364078	0.0145631	0.092233	0.0169903	0.0291262	0.038835	0.0242718	0.0752427	0.0461165	0.0679612	0.0703883	0.0169903	0.0218447	0.177563	0.33979	0.150121	0.332526	0.672316	0.489911	0.1157	0.5868	0.1054	0.3691	0.261
Rv0915c	1.12685	8.38275	0.954677	4.15271	4.04342	3.63202	4.54106	0.909045	6.7703	5.93349	1.03791	0	-0.260404	1.21508	0.741322	PPE14	1272	0	0.224586	0	0.0260047	0.035461	0.0141844	0.108747	0.0118203	0.0401891	0.00472813	0.0827423	0.0260047	0.0236407	0.0969267	0.035461	0.0236407	0.0803783	0.0732861	0.0567376	0.0165485	0.0189125	0.161164	0.33805	0.143868	0.356918	0.694969	0.481918	0.1019	0.4021	0.1342	0.4828	0.236
Rv0916c	0	7.79274	0.933382	4.99751	5.01501	4.58035	5.48053	0.900183	6.77521	7.27484	-0.847441	0.00559284	-0.179479	1.11286	0.822247	PE7	300	0	0.222222	0.010101	0.030303	0.010101	0.030303	0.0505051	0.030303	0.020202	0.020202	0.0606061	0.020202	0.030303	0.0707071	0.010101	0.030303	0.040404	0.141414	0.151515	0	0.020202	0.153333	0.333333	0.183333	0.33	0.663333	0.516667	0.1613	0.4086	0.0488	0.5	0.222
Rv0917	2.88603	7.93171	0.646537	5.61509	5.59966	5.27936	5.95855	0.679194	6.7891	4.29517	0.303106	0	-0.387559	1.0341	0.614167	betP	1782	1	0.118044	0.00337268	0.0438449	0.0202361	0.0489039	0.0927487	0.0185497	0.0640809	0.0084317	0.114671	0.0252951	0.0236088	0.0404722	0.0151771	0.0590219	0.06914	0.0623946	0.114671	0.0337268	0.0236088	0.148709	0.289562	0.23569	0.326038	0.6156	0.525253	0.1635	0.4305	0.1082	0.4528	0.226
Rv0918	1.10533	8.77588	1.06372	5.17261	5.13776	4.45948	5.88073	1.42125	6.77339	4.44938	-0.220123	0	-0.0259894	1.0897	0.975737	Rv0918	477	1	0.170886	0.0126582	0.056962	0.0506329	0.0316456	0.0443038	0.0253165	0.0379747	0.0253165	0.101266	0.0189873	0.0189873	0.056962	0.0316456	0.126582	0.0316456	0.0886076	0.056962	0.0126582	0	0.159329	0.316562	0.176101	0.348008	0.66457	0.492662	0.2044	0.365	0.0687	0.536	0.22
Rv0919	0.713951	9.668	1.74194	5.82334	5.48748	4.42437	7.2212	2.79683	6.75135	2.12256	0.398987	0	0.7284	1.01354	1.73013	Rv0919	501	1	0.114458	0.0180723	0.0963855	0.0240964	0.0361446	0.0843373	0.0421687	0.0421687	0.0180723	0.108434	0.0240964	0.0120482	0.0481928	0.0180723	0.108434	0.0843373	0.0180723	0.0783133	0	0.0240964	0.157685	0.287425	0.209581	0.345309	0.632735	0.497006	0.2092	0.3922	0.096	0.5	0.255
Rv0920c	3.60906	9.68645	0.850326	6.47223	6.55782	5.97194	6.95616	0.984222	6.78696	3.51702	-0.0858508	0	-0.106879	0.957205	0.894848	Rv0920c	1320	0	0.132118	0.00911162	0.0683371	0.0637813	0.0296128	0.070615	0.0159453	0.0546697	0.0523918	0.0797267	0.0136674	0.0250569	0.0387244	0.022779	0.0888383	0.0455581	0.0523918	0.0842825	0.022779	0.0296128	0.197727	0.304545	0.167424	0.330303	0.634848	0.47197	0.1243	0.5276	0.1217	0.4517	0.282
Rv0921	1.67901	10.664	1.15711	6.53025	6.4356	5.87321	7.01176	1.13855	6.78002	5.46886	0.531138	0	0.203798	0.953313	1.20552	Rv0921	582	1	0.139896	0.015544	0.0621762	0.0621762	0.0103627	0.0880829	0.0207254	0.0259067	0.0207254	0.0880829	0.0207254	0.0207254	0.0310881	0.015544	0.139896	0.0466321	0.0466321	0.11399	0.015544	0.015544	0.135739	0.249141	0.190722	0.424399	0.67354	0.439863	0.2143	0.2679	0.0503	0.6364	0.178
Rv0922	4.42825	12.0853	0.811787	8.39304	8.32469	7.85285	8.8575	1.00465	6.79106	8.85365	0.614726	0	-0.123844	0.935631	0.877882	Rv0922	1653	1	0.129091	0.0145455	0.0563636	0.0363636	0.0218182	0.0963636	0.0218182	0.0218182	0.0436364	0.0709091	0.0163636	0.0218182	0.06	0.0327273	0.112727	0.0545455	0.0763636	0.0763636	0.0218182	0.0145455	0.182093	0.330913	0.145191	0.341803	0.672716	0.476104	0.1178	0.4925	0.1368	0.4217	0.24
Rv0923c	0.922791	9.04677	1.15576	5.76988	5.75419	5.01927	6.59411	1.57484	6.77471	3.34973	-0.24604	0	0.137036	1.01873	1.13876	Rv0923c	1065	0	0.0988701	0.00564972	0.0564972	0.039548	0.0169492	0.0875706	0.0508475	0.0310734	0.00282486	0.115819	0.0112994	0.0225989	0.0875706	0.0338983	0.110169	0.0649718	0.0367232	0.079096	0.019774	0.0282486	0.150235	0.369953	0.160563	0.319249	0.689202	0.530516	0.1013	0.5253	0.1075	0.4291	0.253
Rv0924c	2.18439	7.24684	0.932808	5.28311	5.37272	4.73922	5.90012	1.1609	6.77947	3.09299	-0.392819	0	-0.142073	1.07488	0.859653	mntH	1287	0	0.135514	0.00233645	0.0257009	0.0186916	0.0303738	0.10514	0.021028	0.0537383	0.0116822	0.147196	0.0373832	0.021028	0.046729	0.0233645	0.0607477	0.0537383	0.0607477	0.107477	0.0163551	0.021028	0.140637	0.31857	0.205905	0.334887	0.653458	0.524476	0.1123	0.4595	0.096	0.4622	0.236
Rv0925c	2.84453	10.1495	1.00573	7.35435	7.37735	6.75104	8.08715	1.3361	6.78605	3.6133	-0.434239	0	0.0827025	0.923028	1.08443	Rv0925c	738	0	0.0897959	0.0204082	0.0734694	0.0408163	0.0244898	0.106122	0.0326531	0.0489796	0.0163265	0.0857143	0.0326531	0.0489796	0.0612245	0.0285714	0.0653061	0.0489796	0.0653061	0.044898	0.0244898	0.0408163	0.204607	0.327913	0.163957	0.303523	0.631436	0.49187	0.1286	0.5524	0.1395	0.4	0.308
Rv0926c	0	8.26739	0.720942	6.1172	6.12113	5.75819	6.53534	0.777151	6.78803	9.91463	-1.05042	0.00111857	-0.264877	0.985819	0.736849	Rv0926c	1077	0	0.136872	0.0167598	0.0586592	0.0558659	0.0195531	0.0949721	0.0167598	0.0642458	0.0139665	0.0977654	0.0307263	0.0307263	0.0698324	0.027933	0.0502793	0.0530726	0.0335196	0.0893855	0.0111732	0.027933	0.176416	0.320334	0.178273	0.324977	0.645311	0.498607	0.1234	0.5292	0.1241	0.4131	0.262
Rv0927c	1.95627	7.94973	0.801959	5.72514	5.71677	5.30249	6.20685	0.904354	6.78554	4.54492	-0.405674	0	-0.221118	1.02308	0.780608	Rv0927c	792	0	0.193916	0.00380228	0.0608365	0.0304183	0.0304183	0.095057	0.0190114	0.0456274	0.0190114	0.121673	0.0228137	0.0304183	0.0456274	0.0190114	0.0532319	0.0494297	0.0684411	0.0798479	0	0.0114068	0.155303	0.362374	0.169192	0.313131	0.675505	0.531566	0.1213	0.5565	0.088	0.3725	0.312
Rv0928	3.27562	10.3589	0.789189	7.07509	6.99824	6.59798	7.58727	0.989298	6.78945	3.84265	0.045408	0	-0.138566	0.927755	0.86316	pstS3	1113	1	0.127027	0.0135135	0.0513514	0.0243243	0.0405405	0.12973	0.00540541	0.0486486	0.0378378	0.0594595	0.00810811	0.0702703	0.0432432	0.0459459	0.0324324	0.0837838	0.0756757	0.0675676	0.0108108	0.0243243	0.197664	0.295597	0.177898	0.328841	0.624438	0.473495	0.1605	0.466	0.0903	0.5	0.294
Rv0929	2.55779	8.11559	0.802348	6.02919	6.06668	5.55267	6.5297	0.97703	6.78666	3.73199	-0.22482	0	-0.191541	0.993889	0.810186	pstC2	975	1	0.148148	0	0.0216049	0.0308642	0.0679012	0.0833333	0.00617284	0.0679012	0.0216049	0.12963	0.0216049	0.0216049	0.0493827	0.0154321	0.0617284	0.0679012	0.0617284	0.0987654	0.0123457	0.0123457	0.145641	0.291282	0.221538	0.341538	0.632821	0.512821	0.1062	0.3801	0.1103	0.568	0.219
Rv0930	2.56612	9.95305	1.31105	6.53715	6.11599	5.7103	7.1424	1.4321	6.77638	3.11915	0.852333	0	0.358187	0.952865	1.35991	pstA1	927	1	0.116883	0	0.012987	0.0324675	0.0487013	0.0681818	0.0162338	0.0584416	0.012987	0.13961	0.0292208	0.0162338	0.0551948	0.0162338	0.0649351	0.0551948	0.0649351	0.142857	0.025974	0.0227273	0.143474	0.30205	0.22438	0.330097	0.632147	0.526429	0.0916	0.4432	0.1133	0.4916	0.227
Rv0931c	5.76991	12.0621	0.755555	9.65443	9.74886	9.38952	10.0766	0.687121	6.79251	6.88673	-1.33993	0	-0.216319	0.971874	0.785408	pknD	1995	0	0.13253	0.00301205	0.060241	0.0316265	0.0240964	0.0963855	0.0165663	0.0301205	0.0210843	0.0828313	0.0150602	0.0451807	0.0662651	0.0391566	0.0542169	0.0542169	0.0828313	0.105422	0.00753012	0.0316265	0.186967	0.334336	0.160902	0.317794	0.65213	0.495238	0.107	0.5161	0.1245	0.4255	0.26
Rv0932c	6.77735	12.8477	0.663649	10.5768	10.5759	10.2245	10.9961	0.771545	6.79368	7.84578	-1.11223	0	-0.344389	1.00804	0.657338	pstS2	1113	0	0.108108	0.0135135	0.0459459	0.027027	0.0351351	0.12973	0.00540541	0.0513514	0.0378378	0.0621622	0.0135135	0.0567568	0.0567568	0.0432432	0.0189189	0.102703	0.0918919	0.0567568	0.0108108	0.0324324	0.21204	0.310872	0.174304	0.302785	0.613657	0.485175	0.1242	0.5031	0.1404	0.4359	0.288
Rv0933	3.66111	11.7031	1.02945	7.84117	8.15405	7.34307	8.54943	1.20636	6.78644	5.42023	-1.27199	0	0.105391	0.924063	1.10712	pstB	831	1	0.108696	0.00724638	0.0615942	0.0471014	0.0471014	0.0869565	0.0108696	0.0253623	0.0362319	0.115942	0.0289855	0.0326087	0.0471014	0.0326087	0.0905797	0.0615942	0.0615942	0.0797101	0.00362319	0.0144928	0.173285	0.308063	0.196149	0.322503	0.630566	0.504212	0.183	0.4681	0.0913	0.4434	0.274
Rv0934	3.70561	10.044	1.06901	8.11252	8.40295	7.77916	8.77201	0.99285	6.78628	5.46186	-1.49427	0	0.140969	0.928038	1.1427	pstS1	1125	1	0.147059	0.00802139	0.0427807	0.026738	0.0320856	0.114973	0.0187166	0.0508021	0.0320856	0.0962567	0.0160428	0.0481283	0.0721925	0.0508021	0.013369	0.0695187	0.0721925	0.0508021	0.0106952	0.026738	0.184	0.335111	0.171556	0.309333	0.644444	0.506667	0.1327	0.5154	0.0803	0.4679	0.325
Rv0935	3.75849	9.88705	1.02034	7.91287	8.16694	7.52794	8.58228	1.05435	6.78673	5.15355	-1.43629	0	0.095646	0.924699	1.09737	pstC1	1017	1	0.136095	0.00295858	0.0177515	0.035503	0.0177515	0.112426	0.0177515	0.0710059	0.00591716	0.121302	0.0384615	0.0295858	0.056213	0.00591716	0.0502959	0.035503	0.0680473	0.147929	0.0147929	0.0147929	0.136676	0.289086	0.20944	0.364798	0.653884	0.498525	0.125	0.4145	0.0664	0.5229	0.254
Rv0936	0	9.89993	1.23874	6.83646	7.09708	6.30232	7.71507	1.41275	6.77625	6.5847	-1.51388	0.0033557	0.302618	0.936126	1.30434	pstA2	906	1	0.112957	0.00996678	0.0232558	0.0265781	0.0232558	0.0930233	0.00332226	0.0697674	0.0199336	0.136213	0.0199336	0.0166113	0.0531561	0.0232558	0.0498339	0.0830565	0.0564784	0.10299	0.0332226	0.0431894	0.142384	0.284768	0.227373	0.345475	0.630243	0.512141	0.1212	0.3939	0.0843	0.5614	0.245
Rv0937c	2.29851	8.79068	0.90604	6.98709	7.01622	6.45326	7.6046	1.15135	6.78694	4.23525	-0.652014	0	-0.0242138	0.930253	0.977513	mku	822	0	0.0952381	0.00732601	0.106227	0.0769231	0.03663	0.03663	0.021978	0.040293	0.0586081	0.0842491	0.032967	0.021978	0.0549451	0.032967	0.0695971	0.0549451	0.043956	0.0879121	0.00732601	0.029304	0.215328	0.29927	0.16545	0.319951	0.619221	0.46472	0.088	0.5602	0.0945	0.5421	0.272
Rv0938	3.93838	9.24787	0.866465	7.07472	7.07844	6.58923	7.60138	1.01215	6.78804	3.74743	-0.321182	0	-0.0612993	0.927764	0.940427	ligD	2280	1	0.102767	0.00395257	0.0658762	0.0566535	0.0263505	0.088274	0.0289855	0.027668	0.0382082	0.0974967	0.0144928	0.0210804	0.0619236	0.0316206	0.0843215	0.0592885	0.0658762	0.0750988	0.0237154	0.0263505	0.183333	0.317544	0.160965	0.338158	0.655702	0.478509	0.1325	0.4858	0.1068	0.474	0.264
Rv0939	3.18454	9.40714	0.694063	7.36928	7.35653	7.00432	7.76609	0.761773	6.79117	5.45203	-0.469645	0	-0.228834	0.922897	0.772893	Rv0939	1935	1	0.108696	0.0124224	0.076087	0.0512422	0.0279503	0.0993789	0.0232919	0.0450311	0.0139752	0.102484	0.0186335	0.0170807	0.068323	0.0232919	0.0714286	0.0465839	0.0714286	0.0791925	0.0186335	0.0248447	0.163824	0.326615	0.164341	0.34522	0.671835	0.490956	0.0941	0.5009	0.0974	0.4979	0.277
Rv0940c	3.89671	9.86728	0.804535	6.63063	6.54494	6.09331	7.12158	1.02828	6.78845	4.13876	0.548179	0	-0.142546	0.947081	0.85918	Rv0940c	867	0	0.0972222	0.00347222	0.0659722	0.0659722	0.0625	0.0902778	0.0138889	0.0625	0.0520833	0.0729167	0.03125	0.0173611	0.0763889	0.0104167	0.0659722	0.0347222	0.0694444	0.0659722	0.00694444	0.0347222	0.204152	0.322953	0.168397	0.304498	0.627451	0.491349	0.0996	0.5809	0.1176	0.4335	0.331
Rv0941c	5.13296	9.26894	0.563142	6.79587	6.81226	6.42554	7.11554	0.690005	6.79229	4.21728	0.287351	0	-0.374955	0.938097	0.626771	Rv0941c	774	0	0.143969	0.00389105	0.0428016	0.0389105	0.0194553	0.0544747	0.0077821	0.0466926	0.0272374	0.0894942	0.0116732	0.0272374	0.0583658	0.0311284	0.077821	0.11284	0.0622568	0.116732	0.0233463	0.00389105	0.173127	0.329457	0.177003	0.320413	0.649871	0.50646	0.1295	0.4866	0.1306	0.3905	0.251
Rv0942	0	10.5774	2.14643	4.11859	3.60875	2.63915	5.9981	3.35895	6.64809	2.3275	0.404204	0.0369128	0.927214	1.21922	1.92894	Rv0942	279	1	0.141304	0.0217391	0.0326087	0.0108696	0.0217391	0.076087	0.0434783	0.0434783	0.0217391	0.0652174	0.0434783	0.0543478	0.076087	0.0217391	0.0978261	0.152174	0.0326087	0.0217391	0	0.0217391	0.204301	0.344086	0.189964	0.261649	0.605735	0.53405	0.1905	0.4762	0.1831	0.2985	0.176
Rv0943c	0	7.35262	1.17565	2.53389	2.41132	1.76841	3.23398	1.46557	6.68303	4.35823	0.697065	0.01566	-0.237038	1.41269	0.764689	Rv0943c	1041	0	0.147399	0.00578035	0.0549133	0.0404624	0.0317919	0.0924855	0.0289017	0.0433526	0.0144509	0.0520231	0.0115607	0.00867052	0.0578035	0.0404624	0.101156	0.0578035	0.0953757	0.0751445	0.0202312	0.0202312	0.170989	0.366955	0.150817	0.311239	0.678194	0.517771	0.1254	0.5809	0.1268	0.3197	0.263
Rv0944	0	8.93674	1.20547	5.08448	5.15442	4.63243	5.72636	1.09393	6.7638	5.16603	-0.512531	0.00447427	0.103979	1.10149	1.10571	Rv0944	477	1	0.126582	0.0316456	0.0632911	0.0253165	0.0189873	0.107595	0.0189873	0.0379747	0.056962	0.101266	0.0253165	0.0126582	0.0443038	0.0379747	0.0696203	0.0696203	0.0696203	0.0696203	0	0.0126582	0.169811	0.320755	0.165618	0.343816	0.66457	0.486373	0.1176	0.4853	0.0846	0.5	0.269
Rv0945	3.69777	8.3421	0.674927	6.66723	6.74069	6.35149	7.08753	0.736039	6.79035	5.33369	-1.04893	0	-0.270032	0.944959	0.731695	Rv0945	762	1	0.13834	0.00395257	0.0355731	0.0592885	0.0158103	0.0909091	0.00790514	0.055336	0.0474308	0.106719	0.027668	0.0237154	0.0434783	0.0237154	0.083004	0.0592885	0.0513834	0.0909091	0.0197628	0.0158103	0.186352	0.316273	0.15748	0.339895	0.656168	0.473753	0.0817	0.5192	0.1349	0.4328	0.251
Rv0946c	4.02045	8.01821	0.52825	6.209	6.19437	5.95907	6.4703	0.511231	6.79203	5.18429	-0.390546	0	-0.449476	0.977726	0.55225	pgi	1662	0	0.108499	0	0.079566	0.034358	0.0488246	0.0886076	0.0325497	0.045208	0.0162749	0.0994575	0.0180832	0.0271248	0.045208	0.034358	0.0650995	0.0650995	0.0831826	0.0723327	0.0162749	0.0198915	0.173285	0.338748	0.183514	0.304452	0.643201	0.522262	0.1314	0.5421	0.0859	0.4315	0.32
Rv0947c	2.02772	10.7852	1.05501	6.79727	6.93706	6.24101	7.51388	1.27286	6.78296	4.56548	-0.698023	0	0.116984	0.938028	1.11871	Rv0947c	231	0	NA	NA	NA	NA	NA	NA	NA	NA	NA	NA	NA	NA	NA	NA	NA	NA	NA	NA	NA	NA	0.181818	0.298701	0.203463	0.316017	0.614719	0.502165	NA	NA	NA	NA	NA
Rv0948c	4.82779	11.7024	0.845415	8.63308	8.72353	8.26926	9.10873	0.839469	6.79076	5.91685	-0.646028	0	-0.097086	0.942502	0.90464	Rv0948c	318	0	0.0952381	0	0.047619	0.12381	0	0.0761905	0.0380952	0.0571429	0.047619	0.142857	0.047619	0.0190476	0.0571429	0.00952381	0.114286	0.047619	0.0190476	0.047619	0	0.00952381	0.232704	0.301887	0.157233	0.308176	0.610063	0.459119	0.1235	0.5309	0.1932	0.3659	0.206
Rv0949	3.40953	8.48519	0.575125	6.41921	6.46411	6.18806	6.71962	0.531556	6.79156	7.04924	-0.756769	0	-0.385832	0.960957	0.615895	uvrD1	2316	1	0.108949	0.00389105	0.0713359	0.0726329	0.0298314	0.077821	0.0181582	0.0453956	0.0207523	0.0985733	0.0168612	0.0389105	0.0428016	0.0298314	0.0972763	0.0570687	0.0440986	0.0881971	0.00648508	0.0311284	0.174439	0.313472	0.173575	0.338515	0.651986	0.487047	0.1261	0.5182	0.0695	0.5044	0.286
Rv0950c	3.41928	10.6525	1.22113	7.96758	8.21598	7.45093	8.78017	1.32924	6.78306	4.31428	-1.09899	0	0.29577	0.925356	1.2975	Rv0950c	999	0	0.141566	0.00301205	0.0692771	0.0572289	0.0271084	0.0963855	0.0361446	0.0391566	0.0120482	0.0963855	0.0180723	0.0210843	0.060241	0.0271084	0.063253	0.0421687	0.0662651	0.0843373	0.0150602	0.0240964	0.177177	0.335335	0.158158	0.329329	0.664665	0.493493	0.1211	0.5121	0.1341	0.4153	0.293
Rv0951	5.3129	12.8896	0.897677	9.20138	9.3249	8.70922	9.86371	1.15449	6.79082	4.69575	-0.605748	0	-0.059526	0.957203	0.9422	sucC	1164	1	0.144703	0.00516796	0.0697674	0.0775194	0.0258398	0.0930233	0.0232558	0.0465116	0.0671835	0.0981912	0.0206718	0.0361757	0.0361757	0.0206718	0.0335917	0.0258398	0.0490956	0.103359	0.00258398	0.0206718	0.203608	0.301546	0.160653	0.334192	0.635739	0.462199	0.1306	0.5669	0.0812	0.4621	0.309
Rv0952	5.25206	12.871	0.959275	8.98949	9.10519	8.44319	9.69428	1.2511	6.78988	3.83093	-0.488284	0	0.00802416	0.95125	1.00975	sucD	912	1	0.125413	0.00330033	0.0429043	0.0594059	0.029703	0.122112	0.019802	0.10231	0.049505	0.0594059	0.0264026	0.019802	0.0528053	0.019802	0.0330033	0.0528053	0.0891089	0.0759076	0.00330033	0.0132013	0.199561	0.310307	0.173246	0.316886	0.627193	0.483553	0.1529	0.549	0.0745	0.4286	0.301
[truncated: 2,940 more rows]
[truncated: 45 more columns]

## Sheet: annotation
feature_name	feature	group	subgroup	ref
width	gene width	Sequence	Gene width	https://www.ncbi.nlm.nih.gov/assembly/GCF_000195955.2
strand	strand	Sequence	Strand	https://www.ncbi.nlm.nih.gov/assembly/GCF_000195955.2
AA_A	Ala%	Sequence	Amino type	https://www.ncbi.nlm.nih.gov/assembly/GCF_000195955.2
AA_C	Cys%	Sequence	Amino type	https://www.ncbi.nlm.nih.gov/assembly/GCF_000195955.2
[truncated: 74 more rows]
