# Supplementary material for: Genetically encoded transcriptional plasticity underlies stress adaptation in Mycobacterium tuberculosis
Source: Research Square preprint supplement (doi:10.21203/rs.3.rs-3303807/v1), 2023-09-18
Supplement: Supplementary file 5 [file Table S5.xlsx]

## Sheet: Msm
gene	MinExpr	MaxExpr	SD_logRPKM	Mean_logRPKM	Median_logRPKM	Q.25_logRPKM	Q.75_logRPKM	IQR_logRPKM	ShannonIndex	Kurtosis	Skewness	ZeroExpr_proportion	residual.SD_logRPKM	LOESS.fit	TP
MSMEG_0002	5.82099	8.79097	0.687846	7.4353	7.50609	6.93901	8.03128	1.09227	5.25317	2.23318	-0.447574	0	-0.387537	1.07538	0.766858
MSMEG_0003	6.37458	10.1214	0.7088	8.39034	8.40804	7.84691	8.96968	1.12277	5.25392	2.50336	-0.120206	0	-0.384572	1.09337	0.769824
MSMEG_0004	2.80522	6.58204	0.713249	4.84047	4.7562	4.3804	5.29868	0.918285	5.24669	3.0414	0.219882	0	-0.447001	1.16025	0.707394
MSMEG_0005	7.34934	12.6269	1.03389	10.1799	10.4538	9.40374	10.9785	1.57475	5.25225	2.60398	-0.54039	0	-0.0968148	1.13071	1.05758
MSMEG_0006	6.01685	11.1915	1.08054	9.14916	9.4269	8.77837	9.90012	1.12176	5.25017	3.72789	-1.1785	0	-0.0251341	1.10568	1.12926
MSMEG_0007	6.0663	10.0531	0.803278	8.25726	8.49156	7.85764	8.78616	0.928529	5.25264	3.13341	-0.803001	0	-0.288594	1.09187	0.865801
MSMEG_0011	1.87196	9.04326	1.54039	5.53279	5.62621	4.40583	6.78681	2.38098	5.21702	2.48216	-0.126477	0	0.422556	1.11784	1.57695
MSMEG_0012	1.99621	8.3542	1.19945	4.86287	4.9109	4.12263	5.55464	1.43201	5.22712	3.34605	0.342126	0	0.0406724	1.15878	1.19507
MSMEG_0013	2.34985	8.20539	1.13661	4.88781	4.91128	4.20189	5.59881	1.39692	5.23023	3.33961	0.200977	0	-0.0205338	1.15715	1.13386
MSMEG_0014	1.13116	8.45651	1.62615	4.69998	4.50341	3.73426	5.53757	1.80331	5.19747	2.66701	0.389438	0	0.456521	1.16963	1.61092
MSMEG_0015	0.716249	5.13786	0.920397	2.65337	2.57361	1.97038	3.37455	1.40417	5.19677	2.78943	0.338315	0	-0.318305	1.2387	0.83609
MSMEG_0016	0	5.98297	1.28035	1.83085	1.50584	0.874852	2.58038	1.70553	5.01995	3.72869	1.03954	0.0260417	0.0368202	1.24353	1.19122
MSMEG_0017	0.815137	8.22186	1.45771	3.64916	3.60749	2.61232	4.57365	1.96133	5.17771	3.91646	0.619423	0	0.228122	1.22959	1.38252
MSMEG_0018	0.543404	7.32485	1.45183	2.83841	2.76086	1.7142	3.80695	2.09276	5.12751	3.45062	0.695144	0	0.212948	1.23888	1.36734
MSMEG_0019	4.40274	12.411	1.41303	7.40326	7.46162	6.46647	8.11921	1.65274	5.23994	5.44808	0.913525	0	0.338109	1.07492	1.4925
MSMEG_0020	1.41974	9.30626	1.78432	5.44446	5.39575	4.19876	6.76471	2.56595	5.20166	2.46717	0.0562861	0	0.661879	1.12244	1.81627
MSMEG_0021	0.50006	7.94137	1.57248	4.28634	3.96654	3.28538	5.41171	2.12633	5.18986	2.62694	0.429642	0	0.374554	1.19793	1.52895
MSMEG_0022	0.819953	7.80522	1.33903	5.02799	4.89535	3.95509	6.10934	2.15425	5.22109	2.32253	0.0445725	0	0.190941	1.14809	1.34534
MSMEG_0023	3.58824	7.36653	0.758178	5.69815	5.65717	5.15867	6.26764	1.10896	5.24857	2.74857	-0.113876	0	-0.351804	1.10998	0.802591
MSMEG_0024	6.53179	11.2663	0.929082	9.81635	10.0324	9.45499	10.4585	1.00348	5.25285	4.24241	-1.14274	0	-0.191892	1.12097	0.962503
MSMEG_0025	3.22054	7.84772	0.969189	5.39124	5.17844	4.80147	5.98132	1.17985	5.24153	2.98248	0.374101	0	-0.1562	1.12539	0.998196
MSMEG_0026	3.39551	9.45748	0.942321	6.87599	6.94124	6.24289	7.54734	1.30445	5.24794	3.38616	-0.2271	0	-0.134282	1.0766	1.02011
MSMEG_0027	4.07985	7.07497	0.65885	5.6275	5.59163	5.20682	6.10195	0.895133	5.25065	2.54183	0.0440297	0	-0.454381	1.11323	0.700015
MSMEG_0028	7.00945	9.86756	0.659029	8.72841	8.84188	8.34012	9.24921	0.909089	5.25461	2.69779	-0.591772	0	-0.439072	1.0981	0.715323
MSMEG_0029	6.10286	9.55241	0.640969	7.37461	7.3447	6.88117	7.77077	0.889601	5.25378	3.19364	0.555254	0	-0.433585	1.07455	0.72081
MSMEG_0030	6.42548	9.22242	0.678395	8.01569	8.2306	7.53801	8.56978	1.03177	5.25385	2.44604	-0.686855	0	-0.409632	1.08803	0.744764
MSMEG_0031	6.09027	9.09374	0.693476	7.99575	8.14832	7.47246	8.52089	1.04842	5.25367	2.50335	-0.634082	0	-0.394131	1.08761	0.760265
MSMEG_0032	5.31794	8.81632	0.726152	7.46661	7.58013	7.04398	7.96373	0.919743	5.25265	3.20499	-0.721991	0	-0.349731	1.07588	0.804664
MSMEG_0033	6.26568	9.3565	0.648069	8.09746	8.23829	7.67945	8.54805	0.868599	5.25425	3.1511	-0.616687	0	-0.441546	1.08962	0.71285
MSMEG_0034	4.93795	8.03275	0.726423	6.73047	6.78463	6.22269	7.26571	1.04303	5.25158	2.41131	-0.436234	0	-0.351747	1.07817	0.802648
MSMEG_0035	7.37893	10.8206	0.480039	9.2611	9.31458	8.99362	9.5768	0.583178	5.25614	4.60624	-0.572284	0	-0.627942	1.10798	0.526453
MSMEG_0038	2.15819	12.4404	1.62162	5.13177	4.93998	4.44543	5.60917	1.16373	5.2135	9.86446	2.05316	0	0.480163	1.14146	1.63456
MSMEG_0039	0	5.22712	0.990426	1.17045	0.869744	0.538225	1.55656	1.01834	4.9524	7.42924	1.89842	0.0364583	-0.246478	1.2369	0.907917
MSMEG_0041	0	7.07444	1.23245	1.56942	1.44606	0.759979	2.08353	1.32355	4.97112	8.57051	1.90338	0.0885417	-0.00906841	1.24152	1.14533
MSMEG_0042	1.66273	6.69576	0.954671	3.48973	3.35908	2.91602	3.83229	0.916272	5.22183	3.5464	0.861748	0	-0.282047	1.23672	0.872348
MSMEG_0043	2.44344	6.04991	0.707171	4.23769	4.24362	3.77577	4.64425	0.868476	5.24351	2.97372	0.0756257	0	-0.493598	1.20077	0.660797
MSMEG_0044	5.24793	8.84604	0.550276	7.51493	7.55551	7.22993	7.8951	0.665173	5.25478	4.6874	-0.604379	0	-0.526463	1.07674	0.627932
MSMEG_0045	6.59567	10.4533	0.620332	8.6462	8.6831	8.21773	9.00112	0.783395	5.25493	3.11674	-0.0132178	0	-0.476502	1.09683	0.677894
MSMEG_0046	3.23284	7.3022	0.652445	5.64538	5.70358	5.20237	6.10392	0.901555	5.25072	3.53966	-0.308904	0	-0.45995	1.11239	0.694446
MSMEG_0047	2.84829	7.7052	0.698959	6.32735	6.34969	5.91516	6.85395	0.938788	5.25113	5.92386	-0.88806	0	-0.386099	1.08506	0.768297
MSMEG_0048	2.92027	6.8846	0.923251	5.15815	5.15873	4.54297	5.90408	1.36111	5.24104	2.27219	-0.317253	0	-0.216524	1.13978	0.937871
MSMEG_0049	2.94755	7.54279	0.786926	5.04263	4.93187	4.50378	5.58326	1.07949	5.24545	2.93	0.324904	0	-0.360223	1.14715	0.794172
MSMEG_0050	1.24416	8.08005	1.39766	4.45296	4.54954	3.2945	5.5477	2.25319	5.20691	2.4818	0.106248	0	0.210662	1.18699	1.36506
MSMEG_0051	0.763124	9.43375	1.8361	4.435	4.35163	3.11009	5.51593	2.40584	5.16889	2.97581	0.362894	0	0.647829	1.18827	1.80222
MSMEG_0052	3.72718	8.18434	0.795545	6.24115	6.31675	5.74937	6.72039	0.971018	5.24919	3.59924	-0.394971	0	-0.29211	1.08766	0.862285
MSMEG_0053	5.98581	9.5184	0.763723	7.9707	7.99587	7.49503	8.5252	1.03017	5.25283	3.08884	-0.546128	0	-0.323341	1.08706	0.831055
MSMEG_0054	0.316152	5.45578	1.04013	2.93654	2.96051	2.28965	3.77214	1.48249	5.18879	2.50595	-0.232825	0	-0.199457	1.23958	0.954938
MSMEG_0055	1.17275	8.31028	1.51589	4.4164	4.26701	3.53707	5.25745	1.72038	5.19661	3.00965	0.230629	0	0.326321	1.18957	1.48072
MSMEG_0056	0.577328	6.57842	1.29004	3.7415	3.94632	2.87366	4.60025	1.72659	5.19138	2.59066	-0.369211	0	0.0648778	1.22516	1.21927
MSMEG_0057	3.62842	9.6481	1.00295	7.08984	7.16872	6.47815	7.70071	1.22256	5.24727	3.33869	-0.324047	0	-0.0710086	1.07396	1.08339
MSMEG_0058	1.29651	7.47219	1.10747	4.9011	4.87157	4.29396	5.55482	1.26087	5.23091	3.5727	-0.111411	0	-0.0488098	1.15628	1.10559
MSMEG_0059	3.54253	9.39595	1.13049	6.82746	6.89374	6.39909	7.39614	0.997042	5.24322	3.75711	-0.486802	0	0.0533668	1.07713	1.20776
MSMEG_0060	3.66925	9.65448	1.11405	6.99688	7.14689	6.61	7.58621	0.97621	5.24417	3.89416	-0.702163	0	0.0388968	1.07516	1.19329
MSMEG_0061	4.20078	9.95807	1.08296	7.53027	7.61026	7.1441	8.20167	1.05756	5.24662	4.02748	-0.847969	0	0.00593149	1.07703	1.16033
MSMEG_0062	2.7662	9.72353	1.01907	7.19588	7.24085	6.72623	7.84217	1.11594	5.24687	5.74756	-0.825361	0	-0.0543714	1.07344	1.10002
MSMEG_0063	4.2767	10.0086	1.32651	6.82301	6.79026	5.71249	7.81111	2.09862	5.23892	2.50216	0.414667	0	0.249332	1.07718	1.40373
MSMEG_0064	3.97582	10.2401	1.27476	6.99339	6.97166	6.00457	7.79537	1.7908	5.24124	2.84235	0.513681	0	0.199556	1.0752	1.35395
MSMEG_0065	3.74389	12.5795	1.66634	8.76439	8.74429	7.97573	9.69473	1.719	5.23879	3.50062	-0.24796	0	0.567664	1.09868	1.72206
MSMEG_0066	2.91488	11.1504	1.42515	7.55746	7.48193	6.75648	8.36365	1.60717	5.23911	3.72373	-0.207123	0	0.347583	1.07757	1.50198
MSMEG_0067	5.33011	10.7055	1.14215	8.3276	8.45341	7.68468	9.01885	1.33417	5.24797	2.62903	-0.207528	0	0.0495084	1.09264	1.2039
MSMEG_0068	4.72183	9.98443	1.05282	7.90168	8.16863	7.2031	8.59019	1.38709	5.24836	2.92882	-0.555057	0	-0.0326773	1.0855	1.12172
MSMEG_0069	5.76198	10.1849	0.826784	8.03238	7.94921	7.39201	8.6911	1.29909	5.2522	2.51147	0.00536648	0	-0.261585	1.08837	0.89281
MSMEG_0070	4.54206	9.97833	0.813528	7.45014	7.29187	6.91958	8.0554	1.13583	5.25156	3.54811	0.160083	0	-0.262086	1.07561	0.892309
MSMEG_0071	4.74098	9.57511	0.774296	7.60969	7.48576	7.12417	8.0803	0.956132	5.25234	3.58951	0.159546	0	-0.304363	1.07866	0.850032
MSMEG_0076	4.50836	11.0942	1.22162	8.08342	8.0315	7.11291	8.76092	1.64801	5.24618	2.62225	0.274202	0	0.132257	1.08936	1.28665
MSMEG_0077	3.87283	11.3576	1.26584	7.62945	7.48806	6.81201	8.59919	1.78719	5.24388	3.28195	0.365136	0	0.186745	1.07909	1.34114
MSMEG_0078	1.77517	9.52916	1.42242	6.1459	5.91972	5.22097	7.28855	2.06758	5.23022	2.66307	0.0488759	0	0.331192	1.09123	1.48559
MSMEG_0079	2.03344	7.9459	1.25762	5.61181	5.6928	4.79431	6.56896	1.77465	5.23113	2.86986	-0.332912	0	0.143647	1.11397	1.29804
MSMEG_0080	1.85815	8.00815	1.16486	5.696	5.72789	4.93178	6.58831	1.65653	5.23582	2.83657	-0.247094	0	0.0547758	1.11008	1.20917
MSMEG_0081	3.14705	9.0043	1.19718	6.82411	6.89272	5.93784	7.85912	1.92128	5.24163	2.60194	-0.351865	0	0.120018	1.07716	1.27441
MSMEG_0082	4.5649	8.97574	0.852538	7.19493	7.14754	6.62769	7.94906	1.32136	5.25037	3.16273	-0.287913	0	-0.220905	1.07344	0.933491
MSMEG_0083	4.9374	9.18059	0.860123	7.21391	7.26729	6.55585	7.85764	1.30179	5.2503	2.91618	-0.272354	0	-0.213328	1.07345	0.941068
MSMEG_0084	0.442606	7.14608	1.12916	3.93446	3.95136	3.23543	4.83502	1.59959	5.21347	3.06702	-0.171215	0	-0.0870306	1.21619	1.06736
MSMEG_0085	3.00073	9.23044	1.16185	6.16009	6.24554	5.39198	6.81087	1.41889	5.23945	3.01677	-0.0119303	0	0.0712046	1.09065	1.2256
MSMEG_0086	0.11242	6.10237	1.11035	3.04946	3.0003	2.36565	3.6235	1.25785	5.18877	3.2024	0.324276	0	-0.130106	1.24046	1.02429
MSMEG_0087	0.800597	7.50703	1.1919	4.66215	4.75799	4.03102	5.40768	1.37666	5.22234	3.35025	-0.369749	0	0.0196935	1.17221	1.17409
MSMEG_0088	0.890383	8.10844	1.43402	4.52521	4.61098	3.74369	5.34227	1.59858	5.20349	3.11756	-0.134214	0	0.252241	1.18178	1.40664
MSMEG_0089	1.72091	7.76476	1.04911	4.85583	4.78513	4.24715	5.33068	1.08353	5.23422	3.95689	0.401797	0	-0.11013	1.15924	1.04427
MSMEG_0090	4.87477	9.90359	0.871937	6.6769	6.60763	6.13283	7.11416	0.981326	5.24919	4.13863	0.721793	0	-0.206843	1.07878	0.947552
MSMEG_0091	5.13509	11.3562	0.992078	7.62013	7.56276	6.9781	8.26032	1.28223	5.24915	3.6106	0.443145	0	-0.0868086	1.07889	1.06759
MSMEG_0092	2.30641	8.95706	1.31263	6.69944	6.86468	5.88371	7.66808	1.78436	5.23672	3.76294	-0.822007	0	0.234116	1.07852	1.38851
MSMEG_0093	3.69589	8.57342	0.915223	6.4384	6.49023	5.82234	7.00771	1.18537	5.2472	3.2217	-0.258004	0	-0.167224	1.08245	0.987171
MSMEG_0094	0	6.85615	1.48488	1.92498	1.4405	0.761346	2.88566	2.12432	4.96904	3.40817	0.984878	0.0260417	0.240959	1.24392	1.39535
MSMEG_0095	3.50811	9.0471	1.0042	6.24667	6.39046	5.5268	6.82496	1.29816	5.24446	3.01612	-0.0168383	0	-0.083274	1.08747	1.07112
MSMEG_0096	3.96205	10.0723	1.35191	8.30805	8.67116	7.81992	9.22908	1.40916	5.24309	4.05787	-1.29239	0	0.259486	1.09242	1.41388
MSMEG_0097	4.00043	8.74814	1.02689	7.14369	7.32625	6.70246	7.90705	1.20459	5.2466	3.47435	-0.940752	0	-0.0466767	1.07357	1.10772
MSMEG_0098	4.97543	7.73544	0.503848	6.63373	6.64362	6.30834	7.00778	0.699442	5.25458	3.33025	-0.440265	0	-0.575462	1.07931	0.578933
MSMEG_0099	2.3347	6.4619	0.715832	4.0713	3.99538	3.63561	4.44054	0.804937	5.24236	4.26959	0.600147	0	-0.493773	1.2096	0.660623
MSMEG_0100	4.42891	7.4491	0.654017	6.16333	6.15091	5.81804	6.6408	0.822765	5.25181	2.67919	-0.25738	0	-0.436497	1.09051	0.717898
MSMEG_0101	2.56434	7.46927	0.835924	5.51705	5.50364	4.98625	6.05323	1.06697	5.24569	3.47073	-0.357597	0	-0.282709	1.11863	0.871686
MSMEG_0102	4.6894	8.24497	0.646538	6.84947	6.96744	6.58558	7.28113	0.695547	5.25288	4.53757	-1.07008	0	-0.430354	1.07689	0.724041
MSMEG_0103	0.633772	9.91254	1.41187	3.93973	3.78907	3.12984	4.58988	1.46004	5.19633	6.07256	1.16562	0	0.19593	1.21594	1.35033
MSMEG_0104	1.30839	7.10865	0.765354	3.80954	3.71524	3.41479	4.15534	0.740555	5.23849	9.37476	1.54359	0	-0.456634	1.22199	0.697761
MSMEG_0105	1.70193	7.69669	1.10508	4.09457	3.86399	3.41769	4.78775	1.37006	5.22249	4.11621	0.829223	0	-0.103352	1.20844	1.05104
MSMEG_0106	0.26548	6.76869	1.22889	2.22218	1.95613	1.37049	2.83098	1.46049	5.12226	5.90539	1.53042	0	-0.0147397	1.24363	1.13966
MSMEG_0107	4.63514	7.9739	0.668343	6.33484	6.35009	5.98328	6.79312	0.809841	5.25187	3.05729	-0.288642	0	-0.416514	1.08486	0.737882
MSMEG_0108	5.25558	10.4939	1.07429	8.39569	8.76409	7.68812	9.15164	1.46352	5.249	2.86911	-0.786293	0	-0.0191438	1.09344	1.13525
MSMEG_0109	3.22719	7.88896	0.98521	6.07625	6.2679	5.38651	6.85309	1.46657	5.24378	2.84248	-0.626626	0	-0.108884	1.09409	1.04551
MSMEG_0110	4.50218	9.02143	1.04802	7.32247	7.47084	6.36769	8.16473	1.79704	5.2471	2.06138	-0.259611	0	-0.0259926	1.07401	1.1284
MSMEG_0111	1.91395	5.67085	0.806127	4.18137	4.25263	3.70796	4.83228	1.12432	5.23774	3.14151	-0.681565	0	-0.39777	1.2039	0.756625
MSMEG_0113	0.187576	7.99812	1.70262	3.60623	3.8099	2.04163	4.8851	2.84347	5.13388	2.13145	-0.0525565	0	0.470896	1.23172	1.62529
MSMEG_0114	0.480623	9.4759	1.94051	4.27143	4.48737	2.54395	5.74283	3.19888	5.14816	2.20587	0.138714	0	0.741696	1.19881	1.89609
MSMEG_0115	0.598104	8.9943	1.58613	2.95183	2.60629	2.09929	3.09586	0.996573	5.13882	7.21011	2.01007	0	0.346425	1.23971	1.50082
MSMEG_0116	0.993001	11.6811	2.07813	5.829	5.7279	4.56251	7.05107	2.48856	5.19295	3.23411	0.397996	0	0.973844	1.10429	2.12824
MSMEG_0117	1.04885	10.2462	1.79557	3.77076	3.42688	2.68055	3.9444	1.26385	5.16162	6.08268	1.79193	0	0.571783	1.22379	1.72618
MSMEG_0118	1.4802	9.31362	1.47191	4.44734	4.26506	3.52567	5.22965	1.70398	5.20496	4.16917	0.871004	0	0.284514	1.1874	1.43891
MSMEG_0120	4.15023	8.86371	0.877422	6.92234	7.11612	6.35951	7.54982	1.19031	5.24914	3.47764	-0.813919	0	-0.198659	1.07608	0.955737
MSMEG_0121	4.34094	9.95386	0.742795	7.60277	7.6699	7.29558	7.95813	0.662553	5.25259	6.29565	-0.636688	0	-0.335714	1.07851	0.818681
MSMEG_0122	0.245636	7.11772	1.18233	3.72037	3.74404	3.11083	4.43312	1.32229	5.20146	4.42777	-0.0284946	0	-0.0438359	1.22616	1.11056
MSMEG_0124	2.07028	7.82694	0.821393	4.48628	4.44006	4.14707	4.79714	0.650069	5.24143	7.37417	1.15895	0	-0.363183	1.18458	0.791213
MSMEG_0125	0	6.8404	1.21944	1.33522	1.01861	0.680225	1.66805	0.987823	4.95242	12.1053	2.77356	0.0104167	-0.0194938	1.23893	1.1349
MSMEG_0126	1.58624	6.34219	0.782862	3.89434	3.92664	3.46623	4.35893	0.892699	5.237	4.28056	0.147259	0	-0.435197	1.21806	0.719198
MSMEG_0127	2.10561	7.11678	0.992285	4.83651	4.65222	4.20085	5.63841	1.43756	5.2364	2.42463	0.153154	0	-0.168226	1.16051	0.986169
MSMEG_0128	0.934848	6.35769	0.838315	4.40378	4.47782	3.9505	4.85706	0.906557	5.23803	4.99021	-0.542297	0	-0.352121	1.19044	0.802274
MSMEG_0129	5.31675	12.1913	0.987012	8.39202	8.4452	7.91709	8.89167	0.974571	5.2506	5.4118	0.251563	0	-0.10638	1.09339	1.04802
MSMEG_0130	1.07402	10.1707	1.90996	4.86229	4.66734	3.23335	6.33564	3.10229	5.17906	2.23474	0.271746	0	0.751146	1.15882	1.90554
MSMEG_0131	3.05511	8.60993	1.31408	5.87909	6.04168	4.88834	6.83861	1.95027	5.23197	2.16054	-0.0989581	0	0.211894	1.10218	1.36629
MSMEG_0132	4.59419	9.84006	1.03787	7.39419	7.53011	6.66973	8.23911	1.56939	5.24744	2.5781	-0.366875	0	-0.0369323	1.0748	1.11746
MSMEG_0133	3.61355	9.02261	1.18657	6.53355	6.75328	5.67239	7.44405	1.77166	5.24046	2.33166	-0.39085	0	0.105837	1.08073	1.26023
MSMEG_0134	4.46358	9.65245	1.16547	7.46657	7.75488	6.49549	8.42428	1.92879	5.24505	2.1307	-0.334057	0	0.0895917	1.07588	1.24399
MSMEG_0135	2.43152	8.05418	1.16403	5.84934	6.15824	4.93919	6.84393	1.90475	5.237	2.22766	-0.345337	0	0.0605971	1.10343	1.21499
MSMEG_0136	5.08897	10.8858	1.17292	8.56096	8.76252	7.56334	9.53852	1.97518	5.24791	2.32788	-0.405239	0	0.0773212	1.0956	1.23172
MSMEG_0137	4.71512	10.8491	1.27777	8.44408	8.80905	7.42452	9.46813	2.04361	5.24566	2.49808	-0.551177	0	0.183738	1.09404	1.33813
MSMEG_0138	3.03244	9.52562	1.24685	6.91388	7.20925	5.96474	7.81742	1.85268	5.24046	2.79969	-0.575854	0	0.170675	1.07618	1.32507
MSMEG_0139	2.9646	9.36123	1.21942	7.08242	7.25623	6.2842	8.07268	1.78848	5.24185	3.25534	-0.708883	0	0.14539	1.07403	1.29979
MSMEG_0140	2.7632	8.6808	1.11342	6.68469	6.88035	5.90621	7.54052	1.6343	5.24275	3.76445	-0.817142	0	0.0347281	1.07869	1.18912
MSMEG_0141	1.38734	6.01592	0.995433	4.42045	4.60725	3.80059	5.2652	1.46461	5.22999	3.03662	-0.711163	0	-0.193859	1.18929	0.960536
MSMEG_0142	0.392721	5.79766	1.09377	3.93921	4.22895	3.20622	4.78142	1.5752	5.21401	3.01125	-0.740002	0	-0.122194	1.21597	1.0322
MSMEG_0143	0.864577	8.07729	1.2862	5.77469	6.01031	5.0127	6.64143	1.62872	5.22883	5.07634	-1.14404	0	0.179595	1.10661	1.33399
MSMEG_0144	1.84162	8.29667	1.08762	4.52772	4.48743	3.79023	5.23039	1.44016	5.2288	4.14633	0.452669	0	-0.0939801	1.1816	1.06042
MSMEG_0145	0.552902	6.35376	1.22021	3.86615	3.89587	2.92355	4.7461	1.82255	5.20383	2.58171	-0.218338	0	0.000842346	1.21937	1.15524
MSMEG_0146	7.86615	10.3488	0.529299	9.07982	9.08395	8.72816	9.50797	0.779807	5.2558	2.3476	-0.116551	0	-0.57501	1.10431	0.579385
MSMEG_0147	1.3349	6.84196	1.02558	4.16595	4.17204	3.48645	4.74003	1.25358	5.22682	3.12763	0.193681	0	-0.179144	1.20473	0.975251
MSMEG_0148	0.412424	4.46026	0.822559	1.82125	1.68147	1.31494	2.22222	0.907277	5.16117	4.44552	1.06187	0	-0.420918	1.24348	0.733477
MSMEG_0149	0	6.21148	1.14626	1.57324	1.3169	0.848843	1.95079	1.10195	5.03395	8.42779	2.03265	0.0104167	-0.0952947	1.24155	1.0591
MSMEG_0150	1.88896	10.4219	1.37637	4.64695	4.70991	3.72113	5.32797	1.60685	5.21495	4.51703	0.781031	0	0.203119	1.17325	1.35751
MSMEG_0151	0	7.03852	1.13792	1.56105	1.44793	0.774729	2.09552	1.32079	4.98997	6.15316	1.3527	0.0833333	-0.103515	1.24143	1.05088
MSMEG_0152	0.630639	9.17436	1.42902	3.32109	3.28528	2.35377	3.94082	1.58705	5.16739	4.55812	0.893061	0	0.18866	1.24036	1.34306
MSMEG_0153	2.0071	8.62986	1.18201	3.98286	3.93735	3.13353	4.53629	1.40276	5.21573	4.77782	0.999717	0	-0.0318917	1.2139	1.1225
MSMEG_0154	1.92374	9.40565	1.28049	4.78061	4.66074	4.03322	5.52955	1.49633	5.22182	3.93317	0.4833	0	0.116275	1.16421	1.27067
MSMEG_0155	1.91217	9.0811	1.26076	4.53864	4.34036	3.7008	4.99496	1.29416	5.22238	6.20042	1.53133	0	0.0799408	1.18082	1.23434
MSMEG_0156	3.18839	11.105	1.35638	6.32333	6.35253	5.52798	6.92363	1.39565	5.23508	4.28171	0.69055	0	0.271214	1.08517	1.42561
MSMEG_0157	1.90007	12.8648	1.40187	4.81339	4.77927	3.99677	5.21165	1.21487	5.21809	8.73281	1.49506	0	0.239831	1.16204	1.39423
MSMEG_0158	2.00845	14.1219	1.49333	5.95207	6.08	5.16018	6.93543	1.77525	5.22563	7.03187	0.484038	0	0.394163	1.09917	1.54856
MSMEG_0159	0	9.65962	1.31524	2.63917	2.5141	1.81655	3.2286	1.41205	5.13718	6.93856	1.23257	0.00520833	0.0764457	1.23879	1.23084
MSMEG_0160	0.654423	11.5215	1.65116	4.41324	4.32876	3.42903	5.15317	1.72414	5.1868	4.71394	0.661766	0	0.461366	1.18979	1.61576
MSMEG_0161	1.66329	11.584	1.34219	4.38551	4.31767	3.53364	5.00927	1.47563	5.21327	6.79448	1.18372	0	0.150524	1.19167	1.30492
MSMEG_0162	0	9.88006	1.44393	2.62709	2.6427	1.69472	3.48314	1.78841	5.08291	5.65952	0.665059	0.0677083	0.205046	1.23888	1.35944
MSMEG_0163	0	6.15536	1.14752	1.33982	1.16073	0.581734	1.65007	1.06834	4.92487	7.58935	1.86646	0.0833333	-0.0914722	1.23899	1.06292
MSMEG_0164	0	7.81223	1.51095	2.0185	1.715	1.04385	2.46139	1.41754	5.01074	6.99818	1.78156	0.03125	0.266846	1.2441	1.42124
MSMEG_0165	2.29684	8.82534	1.31945	4.67524	4.53343	3.72203	5.37941	1.65738	5.21916	3.65181	0.765124	0	0.148136	1.17131	1.30253
MSMEG_0166	4.24966	8.66923	0.736878	6.15236	5.99596	5.74201	6.60634	0.864337	5.25045	3.59867	0.507809	0	-0.354083	1.09096	0.800313
MSMEG_0167	2.21216	11.4061	1.5018	4.2899	3.84836	3.24766	4.8879	1.64024	5.20321	5.96692	1.5879	0	0.304084	1.19771	1.45848
MSMEG_0168	0.46802	7.90182	1.59162	2.71832	2.19331	1.46501	3.73661	2.2716	5.09735	3.2394	0.957207	0	0.353114	1.23851	1.50751
MSMEG_0170	2.02138	9.2663	1.30818	3.90895	3.54435	2.98834	4.68449	1.69615	5.20644	4.80894	1.29082	0	0.0908011	1.21738	1.2452
MSMEG_0171	0.717903	7.87686	1.5654	3.81256	3.28474	2.59731	5.18109	2.58378	5.1765	2.31103	0.654994	0	0.343553	1.22185	1.49795
MSMEG_0172	3.40794	12.259	1.302	7.6103	7.70446	6.92835	8.31427	1.38593	5.24238	4.04035	-0.280183	0	0.223332	1.07867	1.37773
MSMEG_0173	0.560952	6.76512	0.916778	3.11405	3.10272	2.64997	3.61281	0.962844	5.2129	5.95649	0.523042	0	-0.324052	1.24083	0.830344
MSMEG_0174	0	5.39053	0.985474	3.32458	3.47328	2.61594	4.0846	1.46866	5.20739	3.14607	-0.549431	0.00520833	-0.254843	1.24032	0.899553
MSMEG_0175	0.266704	6.45657	1.1475	2.36757	2.28514	1.55389	2.84861	1.29472	5.14776	5.24472	1.20381	0	-0.0949502	1.24245	1.05945
MSMEG_0176	0	7.19826	1.22896	2.61341	2.52498	1.80893	3.22053	1.4116	5.14928	5.66401	1.10064	0.00520833	-0.0100431	1.239	1.14435
MSMEG_0177	0	5.98379	1.07937	1.64637	1.54522	0.959079	2.05728	1.0982	5.0586	7.59766	1.67772	0.015625	-0.162854	1.24223	0.991541
MSMEG_0178	0	6.51629	1.19338	2.1958	2.20727	1.38342	2.81922	1.4358	5.10823	5.28004	0.99164	0.0104167	-0.0503874	1.24377	1.10401
MSMEG_0179	1.99267	6.65368	0.923917	4.49965	4.42618	3.96905	5.0729	1.10385	5.23575	3.12072	-0.170965	0	-0.259694	1.18361	0.894701
MSMEG_0180	0.810661	6.55794	0.979732	2.94668	2.87572	2.27793	3.47077	1.19283	5.20456	5.4529	1.01032	0	-0.259932	1.23966	0.894463
MSMEG_0181	0.424232	6.78245	1.06538	2.3828	2.3569	1.70222	2.75723	1.05501	5.16789	8.36909	1.74354	0	-0.176902	1.24228	0.977493
MSMEG_0182	3.17245	7.96181	0.804023	4.67156	4.54283	4.18843	4.94916	0.760729	5.24392	8.51941	1.91145	0	-0.367541	1.17156	0.786854
MSMEG_0183	0.489571	5.86424	0.902626	2.87629	2.78124	2.40364	3.18571	0.782065	5.20986	4.84599	0.912431	0	-0.336498	1.23912	0.817897
MSMEG_0184	3.02116	7.46173	1.03039	5.13718	4.94812	4.27304	5.93199	1.65896	5.23765	2.26294	0.342196	0	-0.110725	1.14111	1.04367
MSMEG_0185	2.01693	8.38042	1.11874	5.24193	5.28567	4.7199	5.92953	1.20964	5.234	3.79215	-0.0824687	0	-0.0156947	1.13444	1.1387
MSMEG_0186	0	5.13015	1.01068	2.36076	2.37286	1.88205	2.87546	0.993406	5.15036	3.40552	-0.0224588	0.015625	-0.231847	1.24253	0.922548
MSMEG_0187	3.58693	6.53878	0.63579	5.24142	5.23305	4.78082	5.76622	0.985399	5.25006	2.46953	-0.239486	0	-0.498681	1.13447	0.655715
MSMEG_0188	3.01634	6.32621	0.756942	5.02145	5.17894	4.42829	5.60714	1.17886	5.24583	2.22955	-0.44875	0	-0.391566	1.14851	0.76283
MSMEG_0189	0	6.99261	1.23927	2.248	2.06281	1.41724	2.77318	1.35594	5.11639	6.38426	1.43976	0.00520833	-0.00420994	1.24348	1.15019
MSMEG_0190	0.570549	7.84075	1.1895	2.90951	2.85866	2.15911	3.41305	1.25394	5.18142	7.76359	1.5952	0	-0.0498737	1.23937	1.10452
MSMEG_0191	0.271813	7.35739	1.39955	2.99088	2.82862	1.96422	3.97523	2.01101	5.14362	3.2199	0.442836	0	0.159537	1.24002	1.31393
MSMEG_0192	2.38958	7.63727	0.79851	4.17794	4.13049	3.72167	4.49161	0.769942	5.24091	9.97877	2.05264	0	-0.405573	1.20408	0.748823
MSMEG_0193	2.78419	8.73594	1.39779	4.94142	4.5722	3.88866	5.63594	1.74728	5.22009	3.09706	0.985988	0	0.244126	1.15366	1.39852
MSMEG_0194	3.19693	11.0009	1.33895	7.94173	7.88186	6.91309	8.91075	1.99767	5.24316	2.91039	0.0292858	0	0.252535	1.08642	1.40693
MSMEG_0195	2.30164	7.28015	0.926973	4.53355	4.50272	3.8974	4.90428	1.00688	5.2375	4.37845	0.938451	0	-0.254211	1.18118	0.900184
MSMEG_0196	3.7094	8.33857	0.910749	5.38715	5.35028	4.71616	5.75616	1.04	5.24383	4.40875	1.00249	0	-0.214872	1.12562	0.939523
MSMEG_0197	0	5.76129	1.13723	1.75481	1.53887	1.06388	2.01946	0.955578	5.07456	5.60152	1.60092	0.00520833	-0.105842	1.24307	1.04855
MSMEG_0198	0.308791	7.37167	1.35198	3.11721	3.00197	2.35591	3.56722	1.21131	5.16436	4.15789	0.832297	0	0.11114	1.24084	1.26553
MSMEG_0199	1.33962	6.3958	0.937756	3.65912	3.56609	3.04577	4.12069	1.07493	5.22545	3.66741	0.640458	0	-0.291348	1.2291	0.863048
MSMEG_0200	0.702862	7.91734	1.60481	3.35734	2.99945	2.0907	4.46596	2.37526	5.14307	2.88372	0.544108	0	0.364934	1.23988	1.51933
MSMEG_0204	0	8.31678	1.50889	2.55295	2.27675	1.62381	3.09617	1.47236	5.09999	6.84857	1.64355	0.00520833	0.269117	1.23978	1.42351
MSMEG_0205	0	6.13524	1.07158	1.77273	1.66321	1.07891	2.18577	1.10686	5.08869	8.12189	1.72517	0.0208333	-0.171603	1.24319	0.982792
MSMEG_0206	4.00424	8.42991	0.965132	6.19924	6.16573	5.47285	6.86987	1.39702	5.24548	2.70093	0.277179	0	-0.123998	1.08913	1.0304
MSMEG_0207	0.417734	6.19761	0.83351	2.73207	2.71668	2.26113	3.09445	0.833326	5.21386	8.67425	1.51775	0	-0.404999	1.23851	0.749396
MSMEG_0208	0.594628	6.29058	1.14455	4.08679	4.12733	3.21749	4.83311	1.61561	5.21656	2.57821	-0.052254	0	-0.0642828	1.20883	1.09011
MSMEG_0209	1.31485	5.21597	0.771215	3.00055	3.04698	2.44067	3.56319	1.12253	5.22383	2.54837	0.0503945	0	-0.46888	1.24009	0.685516
MSMEG_0210	2.26532	7.48021	1.08748	5.09035	5.06444	4.35106	5.9348	1.58374	5.23386	2.59581	-0.246788	0	-0.0566216	1.1441	1.09777
MSMEG_0211	4.65684	8.85099	0.714881	7.39975	7.31437	6.89315	8.02145	1.1283	5.2528	2.90427	-0.167134	0	-0.359993	1.07487	0.794402
MSMEG_0212	3.10179	7.54733	0.765666	5.25355	5.41086	4.76451	5.75928	0.994767	5.24665	3.13407	-0.304815	0	-0.368031	1.1337	0.786364
MSMEG_0213	1.85876	6.62429	0.791934	4.93057	4.95933	4.46016	5.48021	1.02005	5.24401	4.00986	-0.539411	0	-0.362433	1.15437	0.791963
MSMEG_0214	4.99604	8.53277	0.594409	6.66444	6.61043	6.30024	6.99482	0.694579	5.25359	3.43464	0.556613	0	-0.484521	1.07893	0.669875
MSMEG_0215	5.53617	8.4421	0.598037	6.91448	6.93785	6.47308	7.25664	0.783562	5.25378	2.74576	0.166267	0	-0.478134	1.07617	0.676262
MSMEG_0216	5.31207	10.9996	1.17823	8.33569	8.49592	7.49962	9.10901	1.60939	5.24721	2.98598	-0.511795	0	0.0854984	1.09273	1.23989
MSMEG_0217	2.0618	6.54893	0.953811	4.06575	4.09664	3.45056	4.62455	1.17399	5.22957	2.70868	0.0661244	0	-0.25607	1.20988	0.898325
MSMEG_0218	0.641865	6.68805	1.28694	2.85491	2.54876	1.98715	3.44163	1.45448	5.16068	3.53422	0.899536	0	0.0479551	1.23898	1.20235
MSMEG_0219	4.42492	10.71	1.05735	7.41752	7.39252	6.8498	7.99943	1.14963	5.24736	3.34894	0.178089	0	-0.0177736	1.07512	1.13662
MSMEG_0220	2.75255	7.24274	0.766893	5.36624	5.49853	4.92749	5.85073	0.92324	5.24691	3.71436	-0.557866	0	-0.359928	1.12682	0.794467
MSMEG_0221	4.29036	8.52787	0.789628	6.63366	6.79205	6.28077	7.15557	0.874797	5.25014	3.65372	-0.850687	0	-0.289683	1.07931	0.864712
MSMEG_0222	6.3811	10.8834	0.788403	8.35036	8.32153	7.91997	8.77457	0.854607	5.25309	3.85011	0.344323	0	-0.304496	1.0929	0.849899
MSMEG_0223	0	6.22681	0.927317	3.65443	3.66077	3.2293	4.11228	0.882985	5.22142	4.76734	-0.33385	0.00520833	-0.302016	1.22933	0.85238
MSMEG_0224	5.03275	9.93358	0.772206	7.18735	7.25062	6.77679	7.56776	0.790968	5.25178	5.20401	0.403234	0	-0.301243	1.07345	0.853153
MSMEG_0225	4.48507	10.0708	1.13045	7.70859	7.69087	7.02558	8.40304	1.37746	5.24662	2.80383	-0.122069	0	0.0495496	1.0809	1.20394
MSMEG_0226	2.87484	8.5796	1.2071	6.04596	6.06558	5.17797	6.89888	1.72091	5.2373	2.41458	-0.0220528	0	0.111766	1.09533	1.26616
MSMEG_0227	2.68275	10.4091	1.33618	6.09351	5.96692	5.28531	6.98332	1.69801	5.23359	3.7048	0.391624	0	0.242797	1.09339	1.39719
MSMEG_0228	5.1317	10.9842	1.2166	7.32761	7.16899	6.6153	7.85531	1.24001	5.24422	4.08124	0.873672	0	0.14255	1.07405	1.29695
MSMEG_0229	6.11342	9.35324	0.622889	7.86457	7.93578	7.43838	8.2602	0.821821	5.25437	2.8653	-0.00614517	0	-0.461738	1.08463	0.692658
MSMEG_0230	3.67995	10.8813	1.74857	7.24909	7.10453	5.99758	8.74942	2.75184	5.2279	1.95185	-0.0271067	0	0.675027	1.07354	1.82942
MSMEG_0231	1.34315	6.85515	0.919856	4.95006	5.02455	4.37333	5.4435	1.07017	5.23926	3.9389	-0.477356	0	-0.23325	1.15311	0.921146
MSMEG_0232	4.54781	10.4218	1.18946	7.7326	7.73898	6.94429	8.6117	1.66741	5.24549	2.7906	-0.162738	0	0.107985	1.08147	1.26238
MSMEG_0233	7.29855	10.9539	0.645382	9.69437	9.73897	9.28585	10.1672	0.881369	5.25526	3.5633	-0.597706	0	-0.47253	1.11791	0.681865
MSMEG_0234	8.56833	12.6497	0.668141	10.4891	10.5624	10.0886	10.9758	0.887234	5.25545	3.71022	-0.433901	0	-0.471469	1.13961	0.682926
MSMEG_0235	0.470886	6.83197	1.09169	5.00162	5.13244	4.36797	5.77391	1.40595	5.2311	3.83703	-0.802708	0	-0.0580954	1.14978	1.0963
MSMEG_0236	4.86919	9.34016	0.839271	7.63977	7.77302	7.19246	8.22708	1.03462	5.25128	3.50952	-0.748927	0	-0.240051	1.07932	0.914344
MSMEG_0238	2.83916	7.78072	1.05057	5.93591	5.9938	5.24475	6.71842	1.47367	5.24116	3.02594	-0.491066	0	-0.0492638	1.09983	1.10513
MSMEG_0239	3.86897	8.26614	1.00154	6.48983	6.63615	5.69389	7.22254	1.52865	5.24527	2.54164	-0.405632	0	-0.0799335	1.08147	1.07446
MSMEG_0240	3.97659	8.71992	0.754714	7.1339	7.17174	6.78977	7.59949	0.809721	5.25165	5.48979	-1.06108	0	-0.318908	1.07362	0.835488
MSMEG_0241	7.03677	10.442	0.636657	8.85202	8.83999	8.53392	9.24023	0.70631	5.2549	3.67582	-0.190535	0	-0.463484	1.10014	0.690911
MSMEG_0242	4.52341	9.69397	0.95326	7.30181	7.37667	6.76062	7.90985	1.14922	5.24879	3.58392	-0.3767	0	-0.120579	1.07384	1.03382
MSMEG_0243	5.32797	11.1354	1.01361	8.44268	8.54494	7.68413	9.22669	1.54256	5.2502	2.7932	-0.256988	0	-0.0804062	1.09402	1.07399
MSMEG_0244	6.66615	13.03	1.09659	10.1373	10.1962	9.48156	10.9336	1.45205	5.25153	3.33829	-0.507097	0	-0.0329358	1.12952	1.12146
MSMEG_0245	1.30517	5.73556	0.855109	3.70903	3.86196	3.15307	4.37154	1.21847	5.22927	2.71611	-0.475095	0	-0.371591	1.2267	0.782804
MSMEG_0246	4.88468	9.83387	1.07334	7.93244	8.0862	7.23389	8.69806	1.46417	5.24808	2.88079	-0.517591	0	-0.0128672	1.08621	1.14153
MSMEG_0247	4.18829	8.15374	0.702574	6.43811	6.38186	5.97595	6.93381	0.957859	5.25153	3.17808	-0.0239511	0	-0.379879	1.08245	0.774516
MSMEG_0248	3.9476	7.92562	0.912932	6.02979	5.79492	5.45968	6.80768	1.348	5.24618	2.18857	0.318845	0	-0.183062	1.09599	0.971333
MSMEG_0249	5.38279	9.70115	0.814066	7.04937	7.0235	6.43301	7.60126	1.16825	5.25094	3.25442	0.488467	0	-0.260359	1.07443	0.894036
MSMEG_0250	7.60766	11.0889	0.607065	10.0027	10.0709	9.7024	10.4165	0.714089	5.25563	4.03758	-0.767492	0	-0.518789	1.12585	0.635606
MSMEG_0251	5.96697	10.4314	0.935332	8.43231	8.57732	7.7397	9.05924	1.31954	5.25129	2.6115	-0.240673	0	-0.158556	1.09389	0.995839
MSMEG_0252	5.47236	9.67516	0.696146	7.95998	8.04381	7.6518	8.35951	0.707708	5.25358	4.7383	-0.787623	0	-0.390681	1.08683	0.763714
MSMEG_0253	0.402069	7.0497	0.994336	4.71826	4.74566	4.24105	5.46148	1.22042	5.23174	5.97843	-1.10549	0	-0.174056	1.16839	0.980339
MSMEG_0254	4.09347	8.65364	0.888388	6.23777	6.18179	5.76319	6.7072	0.944015	5.24734	3.18477	0.0981832	0	-0.199381	1.08777	0.955015
MSMEG_0255	6.34384	10.278	0.849603	8.66466	8.84112	8.00883	9.36443	1.3556	5.25261	2.42648	-0.502311	0	-0.247509	1.09711	0.906886
MSMEG_0256	3.32595	9.44531	0.942605	5.99056	5.98596	5.57715	6.3554	0.778245	5.24531	5.30774	0.590449	0	-0.154991	1.0976	0.999404
MSMEG_0257	2.20309	7.4395	0.97889	4.73662	4.61766	4.1572	5.27943	1.12223	5.23641	3.81197	0.488879	0	-0.188264	1.16715	0.966131
MSMEG_0258	0	6.7502	1.10369	2.00113	1.86324	1.32801	2.49384	1.16582	5.12258	9.89523	2.05729	0.015625	-0.1404	1.24409	1.014
MSMEG_0259	1.1148	6.26057	0.824788	3.02219	2.96309	2.50013	3.42495	0.924817	5.22261	6.65919	1.31072	0	-0.415472	1.24026	0.738923
MSMEG_0260	3.74192	7.91339	0.888497	5.75333	5.72713	5.0786	6.21799	1.13939	5.24581	2.90147	0.496021	0	-0.21904	1.10754	0.935356
MSMEG_0261	5.50441	8.19993	0.63319	6.96798	7.07953	6.46987	7.40442	0.934555	5.25335	2.25647	-0.196534	0	-0.44234	1.07553	0.712055
MSMEG_0262	2.74254	7.52935	1.01862	5.54781	5.80003	4.92235	6.30568	1.38333	5.2395	3.18967	-0.827635	0	-0.0984594	1.11708	1.05594
MSMEG_0263	2.77146	8.22718	1.11128	5.57325	5.74098	4.82477	6.46181	1.63704	5.23686	2.59377	-0.359171	0	-0.00454611	1.11583	1.14985
MSMEG_0264	0.569647	6.66987	1.22962	3.61025	3.86125	2.68618	4.49382	1.80764	5.19292	2.63043	-0.418351	0	-0.00189846	1.23152	1.1525
MSMEG_0265	0.626956	11.9092	2.5332	6.92234	7.36514	6.17715	8.4346	2.25745	5.17776	2.82918	-0.725808	0	1.45712	1.07608	2.61152
MSMEG_0266	3.29477	12.3758	2.18752	8.589	9.15691	7.45497	10.2215	2.76649	5.22171	2.7249	-0.814312	0	1.09153	1.096	2.24592
MSMEG_0267	0.697828	12.0743	2.5825	7.642	8.14586	6.24014	9.61197	3.37183	5.19145	2.65244	-0.70586	0	1.50313	1.07937	2.65753
MSMEG_0268	3.33913	8.4364	1.16222	5.22082	4.93135	4.38696	5.69651	1.30955	5.23388	3.01003	0.847424	0	0.0264376	1.13578	1.18083
MSMEG_0269	2.70241	6.57802	0.671953	4.60453	4.62018	4.25148	4.96097	0.70949	5.24688	3.86462	0.234768	0	-0.504236	1.17619	0.65016
MSMEG_0270	2.04383	7.48486	0.859141	5.19066	5.24565	4.92815	5.62239	0.69424	5.24321	4.69858	-0.408565	0	-0.278564	1.1377	0.875831
MSMEG_0271	0	5.45094	0.97683	1.70259	1.55347	1.07378	2.02936	0.955574	5.11206	7.32483	1.7672	0.0104167	-0.265859	1.24269	0.888536
MSMEG_0276	0	9.18304	1.64061	2.11101	1.76324	1.18187	2.56719	1.38532	5.00156	9.60121	2.24702	0.0520833	0.39656	1.24405	1.55096
MSMEG_0277	0	7.49014	1.43494	1.77719	1.42301	0.866917	2.41711	1.55019	4.97375	7.67135	1.89629	0.0416667	0.191727	1.24322	1.34612
MSMEG_0278	0.282809	7.86834	1.86682	4.28338	4.3706	2.77051	5.85989	3.08938	5.15094	2.14539	-0.163987	0	0.668716	1.1981	1.82311
MSMEG_0279	0	8.35942	2.13229	2.95578	2.23307	1.37448	4.23838	2.8639	5.00258	2.45875	0.786277	0.015625	0.892552	1.23974	2.04695
MSMEG_0280	2.56581	13.3376	2.14552	8.35584	8.69848	7.10458	9.62117	2.51659	5.22218	2.686	-0.467047	0	1.05255	1.09296	2.20695
MSMEG_0281	1.35683	9.59429	1.62609	4.46757	4.05484	3.5782	4.64664	1.06844	5.19809	4.94429	1.46312	0	0.440153	1.18593	1.59455
MSMEG_0282	1.2969	7.32313	1.0689	3.73965	3.61002	3.08807	4.18398	1.09591	5.21839	4.13632	0.890064	0	-0.156351	1.22525	0.998044
MSMEG_0283	2.11379	7.46573	1.11344	4.46318	4.2663	3.6729	4.99733	1.32443	5.22743	3.00147	0.679644	0	-0.0728095	1.18625	1.08159
MSMEG_0284	3.63377	9.44965	1.14416	5.8643	5.63413	5.12685	6.53429	1.40744	5.23935	3.82832	0.950242	0	0.04136	1.1028	1.19576
MSMEG_0285	1.39814	8.84069	1.40294	3.96848	3.60254	3.1422	4.28696	1.14476	5.20071	4.43911	1.29918	0	0.188355	1.21459	1.34275
MSMEG_0286	0	7.77663	1.1637	3.18353	3.22439	2.58733	3.77315	1.18581	5.19055	7.35329	1.09237	0.00520833	-0.0773199	1.24102	1.07708
MSMEG_0287	0	5.39364	0.936675	1.40642	1.26122	0.857531	1.80956	0.952024	5.06432	9.35784	2.04896	0.015625	-0.303096	1.23977	0.851299
MSMEG_0288	0.172093	7.35774	1.33794	2.20648	2.02031	1.42123	2.63734	1.2161	5.09832	7.24794	1.80614	0	0.0942291	1.24371	1.24862
MSMEG_0289	1.96578	8.68397	1.13349	5.51978	5.47631	4.7817	6.03507	1.25337	5.23627	3.66649	0.234444	0	0.014997	1.11849	1.16939
MSMEG_0290	2.31166	7.00787	0.817317	4.62569	4.64874	4.17951	5.06197	0.882462	5.24194	3.98189	0.308736	0	-0.357403	1.17472	0.796993
MSMEG_0291	0.356599	5.94061	0.962602	2.21225	2.17151	1.62789	2.52835	0.900457	5.17131	7.20259	1.56411	0	-0.281083	1.24368	0.873313
MSMEG_0292	0	5.54196	1.12486	1.87723	1.73019	1.19206	2.41293	1.22087	5.06914	4.28492	0.916068	0.046875	-0.118885	1.24375	1.03551
MSMEG_0293	0.354786	6.08582	1.07986	2.32137	2.22988	1.53939	2.85566	1.31627	5.15598	5.11797	1.16952	0	-0.163055	1.24291	0.991341
MSMEG_0294	0.71507	7.05112	1.11394	3.23439	3.27795	2.55533	3.8134	1.25807	5.19935	4.865	0.803197	0	-0.127016	1.24096	1.02738
MSMEG_0295	0	6.76407	1.22497	2.64082	2.60502	1.897	3.33759	1.44059	5.1499	4.8973	0.890712	0.00520833	-0.0138075	1.23878	1.14059
MSMEG_0296	1.56774	5.44447	0.787236	3.37619	3.34619	2.85694	3.9122	1.05526	5.23007	2.68359	0.141231	0	-0.452333	1.23957	0.702062
MSMEG_0297	0	6.79575	1.19595	1.14723	0.906995	0.450802	1.47557	1.02477	4.86448	13.9577	3.00819	0.0416667	-0.0406649	1.23661	1.11373
MSMEG_0299	0.417637	7.90557	1.37956	2.57234	2.34518	1.72953	3.2741	1.54457	5.12375	6.02297	1.34112	0	0.140072	1.23948	1.29447
MSMEG_0300	2.22494	7.78497	1.0963	4.91121	4.88282	4.35631	5.40636	1.05006	5.23237	3.35511	0.198628	0	-0.059325	1.15562	1.09507
MSMEG_0301	4.12764	9.19055	1.0758	6.1494	6.07476	5.23104	6.74133	1.51028	5.24253	2.945	0.51802	0	-0.0152845	1.09108	1.13911
MSMEG_0302	3.33109	8.11025	0.913967	5.34242	5.21282	4.7994	5.7077	0.908293	5.24335	3.96725	0.802267	0	-0.21425	1.12822	0.940146
MSMEG_0303	0.493647	8.83343	1.98603	4.02515	3.66981	2.54168	5.5225	2.98081	5.13405	2.41613	0.462651	0	0.774161	1.21187	1.92856
MSMEG_0304	4.40509	8.64331	0.784337	6.4123	6.37184	5.95825	6.88915	0.930903	5.25009	3.42548	0.320266	0	-0.298658	1.083	0.855737
MSMEG_0305	2.80727	7.69725	0.875567	4.94589	4.87618	4.37573	5.49206	1.11633	5.24184	3.00882	0.188614	0	-0.277809	1.15338	0.876587
MSMEG_0306	0.533472	6.22886	0.945745	2.52481	2.47448	1.93701	2.93835	1.00134	5.19231	6.5637	1.35304	0	-0.294518	1.24026	0.859877
MSMEG_0307	0.88509	7.31171	1.05189	3.87767	3.79456	3.25982	4.40293	1.14312	5.22135	4.78841	0.732713	0	-0.166945	1.21883	0.98745
MSMEG_0308	0.970628	6.34932	0.977725	3.61461	3.54645	2.95119	4.16583	1.21464	5.22107	3.32927	0.433429	0	-0.253576	1.2313	0.90082
MSMEG_0309	3.96357	9.45948	0.903102	6.1278	6.19022	5.56356	6.7007	1.13713	5.24664	3.63649	0.152591	0	-0.188875	1.09198	0.965521
MSMEG_0310	0.504203	6.99715	0.998106	4.46805	4.73881	3.85737	5.11544	1.25807	5.23016	3.96008	-0.654742	0	-0.187792	1.1859	0.966604
MSMEG_0311	4.38863	8.87315	0.817754	7.30899	7.43137	6.8201	7.95127	1.13117	5.25104	3.5967	-0.736008	0	-0.256141	1.07389	0.898254
MSMEG_0312	1.28648	9.46272	1.74945	6.15118	6.47988	5.24348	7.37129	2.12781	5.21135	3.36463	-0.779272	0	0.658436	1.09101	1.81283
MSMEG_0313	1.43015	10.6642	1.88476	7.45147	7.67305	6.79302	8.78572	1.9927	5.22127	3.55107	-0.93378	0	0.809126	1.07564	1.96352
MSMEG_0314	1.39328	9.9981	2.07019	6.91663	7.27725	6.3845	8.48101	2.09651	5.2038	3.60746	-1.10726	0	0.994043	1.07615	2.14844
MSMEG_0315	3.56904	9.7553	1.12979	7.08214	7.37509	6.2884	7.87412	1.58572	5.24432	2.77883	-0.518466	0	0.0557529	1.07403	1.21015
MSMEG_0316	2.82012	7.70902	1.02593	5.85359	5.94386	5.24067	6.73223	1.49156	5.24153	2.67123	-0.487471	0	-0.077319	1.10325	1.07708
MSMEG_0317	7.2679	10.9832	0.732272	9.23816	9.28995	8.83163	9.81813	0.986502	5.25432	2.72719	-0.482252	0	-0.375228	1.1075	0.779167
MSMEG_0318	3.28122	7.61617	1.01035	5.15081	4.91902	4.49518	5.6818	1.18662	5.23889	2.86599	0.674026	0	-0.129896	1.14024	1.0245
MSMEG_0319	4.21238	8.42032	0.678715	6.17931	6.19718	5.81822	6.55109	0.732876	5.25146	4.46641	0.0795823	0	-0.411169	1.08988	0.743226
MSMEG_0320	1.35535	6.75156	0.897289	3.76351	3.63739	3.26644	4.08668	0.82024	5.23001	5.1826	0.905145	0	-0.326842	1.22413	0.827553
MSMEG_0321	6.02407	10.2021	0.756786	8.00951	7.93972	7.56601	8.45892	0.89291	5.25305	3.13477	0.146486	0	-0.331112	1.0879	0.823283
MSMEG_0322	0.510894	5.02155	0.821355	2.30624	2.19818	1.85633	2.7858	0.929469	5.19534	4.38701	0.774577	0	-0.421689	1.24304	0.732707
MSMEG_0323	1.48229	6.87875	0.939351	3.32589	3.38392	2.69717	3.7282	1.03104	5.21954	5.87381	1.07155	0	-0.300951	1.2403	0.853445
MSMEG_0324	0	6.04848	1.0143	2.17387	2.02852	1.59695	2.49407	0.897115	5.15781	7.17522	1.65817	0.0104167	-0.229562	1.24386	0.924833
MSMEG_0325	0.213834	5.57593	0.954888	1.8675	1.77773	1.35198	2.11965	0.76767	5.14253	7.61484	1.80893	0	-0.288818	1.24371	0.865577
MSMEG_0326	1.65184	9.03195	1.1365	5.18681	5.2297	4.54378	5.66836	1.12459	5.23365	5.11298	0.55183	0	-0.00144748	1.13795	1.15295
MSMEG_0327	1.84256	6.4112	0.74511	3.00643	2.89287	2.61722	3.16988	0.55266	5.23105	11.9394	2.56912	0	-0.49503	1.24014	0.659366
MSMEG_0328	0	6.3448	0.817112	3.32594	3.38456	2.78509	3.77732	0.992227	5.22602	6.61933	0.600006	0.00520833	-0.423189	1.2403	0.731206
MSMEG_0329	0	4.62725	0.919881	1.22781	1.0056	0.663188	1.50867	0.845483	5.01342	5.98326	1.65431	0.0208333	-0.317739	1.23762	0.836656
MSMEG_0330	0.296909	8.60742	1.78285	3.56424	3.22074	2.14576	4.67492	2.52916	5.13431	2.39248	0.594098	0	0.54907	1.23378	1.70346
MSMEG_0331	0.465461	9.17963	1.8904	3.67952	3.40682	2.22697	4.68423	2.45726	5.12656	2.5738	0.599024	0	0.662286	1.22811	1.81668
MSMEG_0332	0.108714	6.76341	1.26934	2.53958	2.43277	1.59234	3.21108	1.61874	5.13839	4.33854	1.01783	0	0.0293395	1.24	1.18373
MSMEG_0333	1.93032	7.69984	1.29227	4.09931	3.92362	3.08565	4.81587	1.73023	5.20978	3.07759	0.731139	0	0.0840755	1.2082	1.23847
MSMEG_0334	2.436	9.43051	1.47709	5.59743	5.05583	4.57795	6.54104	1.96309	5.224	2.75986	0.692784	0	0.362433	1.11466	1.51683
MSMEG_0335	0	5.46929	1.29016	1.91029	1.71156	0.871976	2.63104	1.75906	5.02695	2.80368	0.726521	0.0104167	0.0462858	1.24388	1.20068
MSMEG_0336	0	6.45074	1.46002	2.69583	2.54803	1.63114	3.70562	2.07448	5.10143	2.57293	0.429273	0.015625	0.221479	1.23854	1.37587
MSMEG_0337	1.50614	7.90779	1.4049	4.33563	4.06352	3.29808	5.35885	2.06078	5.20616	2.52491	0.523751	0	0.21	1.1949	1.3644
MSMEG_0338	0	7.88888	1.66721	4.24943	4.0058	3.15729	5.54074	2.38345	5.17656	2.52956	0.233073	0.00520833	0.467113	1.2001	1.62151
MSMEG_0339	0.409266	7.84342	1.48148	3.57085	3.40659	2.66636	4.25513	1.58877	5.16986	3.49581	0.569592	0	0.248007	1.23348	1.4024
MSMEG_0340	0.443361	7.69166	1.25201	3.55485	3.33526	2.86794	4.15437	1.28643	5.19599	4.23797	0.700707	0	0.0178047	1.2342	1.1722
MSMEG_0341	1.73858	7.0129	0.918204	4.02384	3.93541	3.37281	4.6622	1.28939	5.23224	4.00008	0.713027	0	-0.293733	1.21194	0.860662
MSMEG_0342	2.31376	7.29351	0.866421	4.38983	4.32065	3.96844	4.75414	0.785699	5.23827	4.43236	0.52418	0	-0.324958	1.19138	0.829438
MSMEG_0343	3.09158	8.90683	1.03231	5.73303	5.72528	5.14838	6.4069	1.25852	5.24113	3.3327	0.0558954	0	-0.0761184	1.10843	1.07828
MSMEG_0344	0.186864	6.93661	1.13586	2.54868	2.43007	1.797	3.2061	1.4091	5.16395	6.28343	1.29857	0	-0.103991	1.23985	1.0504
MSMEG_0345	1.59738	7.32276	0.988335	3.76446	3.70153	3.13202	4.35526	1.22325	5.22434	5.0612	0.902548	0	-0.235752	1.22409	0.918643
MSMEG_0346	1.59208	6.6153	1.03589	3.55866	3.44793	2.81049	4.23731	1.42682	5.21632	3.54715	0.66145	0	-0.19814	1.23403	0.956255
MSMEG_0347	1.60048	8.07775	0.930596	4.84652	4.84795	4.27348	5.35282	1.07934	5.23904	5.64158	0.447794	0	-0.229256	1.15985	0.925139
MSMEG_0348	1.03678	6.586	0.862403	3.6937	3.62297	3.05901	4.26169	1.20268	5.2309	4.38835	0.711209	0	-0.365029	1.22743	0.789366
MSMEG_0349	4.43946	9.59859	0.893238	6.87474	6.8103	6.3929	7.44868	1.05578	5.2491	3.96096	0.250171	0	-0.183379	1.07662	0.971016
MSMEG_0350	1.3872	6.27595	0.955866	3.90327	3.9103	3.43596	4.54886	1.1129	5.22629	3.3298	-0.0986009	0	-0.261778	1.21764	0.892617
MSMEG_0351	1.20651	6.58468	0.976902	4.23972	4.27518	3.80681	4.87279	1.06598	5.22921	3.60142	-0.386758	0	-0.223752	1.20065	0.930644
MSMEG_0352	0	6.1961	1.13209	4.36511	4.49927	3.95053	5.2639	1.31337	5.21786	3.9984	-0.960121	0.00520833	-0.0609181	1.19301	1.09348
MSMEG_0353	0.591186	5.96202	0.867069	3.78743	3.93567	3.32058	4.33363	1.01304	5.22883	4.13042	-0.610158	0	-0.355946	1.22302	0.798449
MSMEG_0354	0.306927	4.01516	0.643725	2.11542	2.12983	1.74296	2.54674	0.803779	5.20864	3.51881	0.0315028	0	-0.600312	1.24404	0.554083
MSMEG_0355	1.92198	7.67505	1.04278	4.58735	4.70749	3.75149	5.31706	1.56558	5.23098	2.93518	-0.0550066	0	-0.134609	1.17739	1.01979
MSMEG_0356	2.46856	9.19062	1.2279	5.28869	5.14249	4.47103	5.89126	1.42023	5.2311	3.3629	0.554601	0	0.0964209	1.13148	1.25082
MSMEG_0357	3.19495	10.1614	1.59327	5.83583	5.80414	4.63645	7.024	2.38755	5.2207	2.41538	0.380718	0	0.489269	1.104	1.64366
MSMEG_0358	3.24593	9.36462	1.19389	5.2179	4.96261	4.30007	5.80717	1.5071	5.23277	3.62612	0.992857	0	0.0579195	1.13597	1.21231
MSMEG_0359	5.75328	11.3486	0.977462	9.34865	9.56059	8.92304	10.066	1.14294	5.25184	3.54683	-0.952724	0	-0.132399	1.10986	1.022
MSMEG_0360	2.78071	11.3096	1.50694	6.8416	7.16665	5.81217	7.77042	1.95825	5.23221	2.81282	-0.297875	0	0.429963	1.07698	1.58436
MSMEG_0361	3.79263	8.9353	0.781327	7.12185	7.16455	6.57349	7.68221	1.10872	5.25133	4.17644	-0.553994	0	-0.292369	1.0737	0.862027
MSMEG_0362	5.07111	9.25887	0.871475	6.74882	6.81079	6.06588	7.28928	1.22341	5.24925	3.04294	0.326596	0	-0.206494	1.07797	0.947901
MSMEG_0363	3.99905	7.16115	0.574087	5.5549	5.54766	5.26104	5.8544	0.593357	5.25217	3.4942	0.102142	0	-0.542644	1.11673	0.611751
MSMEG_0364	2.48776	8.88173	1.29202	5.87817	6.15097	4.99838	6.85614	1.85776	5.23193	2.97786	-0.46273	0	0.1898	1.10222	1.3442
MSMEG_0365	5.65773	10.2697	0.902509	7.45967	7.62883	6.72726	8.17065	1.44339	5.25017	2.32748	-0.00213518	0	-0.17326	1.07577	0.981135
MSMEG_0366	4.76562	8.96575	0.747543	7.01042	7.07416	6.50467	7.49385	0.98918	5.2518	2.95226	-0.0391204	0	-0.327432	1.07497	0.826964
MSMEG_0367	3.42006	8.49063	1.08274	5.918	5.90326	5.09544	6.65798	1.56254	5.24069	2.46932	0.0717328	0	-0.0178309	1.10057	1.13656
MSMEG_0368	5.97448	9.95923	0.688689	8.14315	8.20786	7.76669	8.5788	0.81211	5.25386	4.00523	-0.600274	0	-0.4017	1.09039	0.752695
MSMEG_0369	3.02517	8.05421	0.988394	5.84427	5.86088	5.27133	6.56725	1.29592	5.24278	2.86642	-0.326776	0	-0.115248	1.10364	1.03915
MSMEG_0370	7.74355	12.9528	0.892344	10.8678	11.0138	10.5764	11.3927	0.816222	5.25402	5.12314	-1.09733	0	-0.2588	1.15114	0.895596
MSMEG_0371	6.00051	12.6131	1.24333	9.95805	10.0301	9.42554	10.8022	1.37671	5.24939	3.98808	-0.797928	0	0.118665	1.12466	1.27306
MSMEG_0372	4.13057	11.4932	1.46925	8.29478	8.38321	7.41719	9.19945	1.78226	5.24114	3.26138	-0.461993	0	0.376976	1.09227	1.53137
MSMEG_0373	6.80168	13.6134	1.23149	11.1614	11.184	10.5151	12.1787	1.66357	5.25121	3.53178	-0.783784	0	0.0710333	1.16046	1.22543
MSMEG_0374	2.00147	8.60352	1.6151	5.38412	5.10508	4.20862	6.82318	2.61456	5.21171	2.0504	0.102224	0	0.489303	1.12579	1.6437
MSMEG_0375	1.62857	11.0258	2.08813	5.84138	6.01633	4.57794	7.40195	2.82401	5.18945	2.32685	-0.104896	0	0.984372	1.10376	2.13877
MSMEG_0376	0.981267	7.72778	1.01362	4.60543	4.49275	3.92534	5.18718	1.26184	5.23303	4.60407	0.366809	0	-0.162509	1.17613	0.991886
MSMEG_0377	0.298115	6.39239	0.991878	2.70204	2.679	2.08857	3.1956	1.10704	5.19055	6.00708	0.954093	0	-0.246648	1.23853	0.907747
MSMEG_0378	0.665552	6.36404	0.860605	2.80217	2.76433	2.38597	3.16674	0.780777	5.21316	8.06167	1.43275	0	-0.378084	1.23869	0.776311
MSMEG_0379	0	5.88926	0.95324	1.68241	1.57933	1.16275	2.04978	0.887035	5.10708	9.47783	1.88143	0.03125	-0.289289	1.24253	0.865106
MSMEG_0380	3.21861	10.1727	1.35105	7.05383	7.17531	6.35017	7.85944	1.50928	5.23794	3.61927	-0.678506	0	0.276686	1.07437	1.43108
MSMEG_0381	5.82197	12.2067	1.32437	9.87639	10.1263	9.26647	10.6501	1.38366	5.24805	3.83797	-0.93623	0	0.201853	1.12252	1.35625
MSMEG_0382	4.70963	11.9276	1.33577	9.18917	9.37397	8.5139	10.2022	1.68827	5.24641	3.68881	-0.797472	0	0.229277	1.10649	1.38367
MSMEG_0383	4.15363	11.5474	1.13117	8.33286	8.3705	7.60272	9.10883	1.50612	5.24809	3.75379	-0.26864	0	0.0384698	1.0927	1.19287
MSMEG_0384	3.61814	7.78311	0.934178	6.03598	6.28546	5.37008	6.73869	1.36861	5.24514	2.54003	-0.489057	0	-0.161563	1.09574	0.992833
MSMEG_0385	3.07183	8.23726	1.17256	5.6884	5.64117	4.91456	6.53008	1.61552	5.23576	2.47196	-0.136391	0	0.0621399	1.11042	1.21654
MSMEG_0386	6.47426	10.1038	0.727955	8.66418	8.67605	8.31643	9.1821	0.865675	5.25392	3.11086	-0.52119	0	-0.36915	1.0971	0.785245
MSMEG_0387	6.19124	11.0387	0.916736	8.36126	8.59788	7.7468	8.96347	1.21667	5.25145	2.81292	-0.164902	0	-0.17629	1.09303	0.978106
MSMEG_0388	5.15016	9.9646	1.04146	8.21576	8.44806	7.57259	8.93837	1.36578	5.2492	2.88944	-0.697708	0	-0.0499549	1.09141	1.10444
MSMEG_0389	5.30143	10.4603	1.07821	8.35551	8.5801	7.67051	9.13087	1.46036	5.24891	2.92793	-0.641544	0	-0.0147504	1.09296	1.13964
MSMEG_0390	3.71601	9.16933	1.10033	6.9797	7.09216	6.37597	7.66705	1.29108	5.2446	3.25408	-0.522323	0	0.0249501	1.07538	1.17935
MSMEG_0391	3.95414	10.6757	1.15371	8.57717	8.78007	7.97146	9.21277	1.24131	5.24788	5.23475	-1.05098	0	0.0578869	1.09583	1.21228
MSMEG_0392	4.58576	9.40416	0.917966	7.42907	7.62088	6.78036	8.08691	1.30655	5.24966	2.88775	-0.560069	0	-0.157324	1.07529	0.997071
MSMEG_0393	3.10782	10.0023	1.4357	6.56138	6.69756	5.77761	7.26556	1.48795	5.2333	3.19952	0.141915	0	0.355394	1.08031	1.50979
MSMEG_0394	5.0632	10.6212	1.14847	7.76195	7.73808	7.04231	8.55547	1.51316	5.24644	2.83398	-0.089901	0	0.0663025	1.08217	1.2207
MSMEG_0399	4.06633	10.3714	1.26386	8.28775	8.51258	7.30531	9.32864	2.02334	5.24545	2.8095	-0.549845	0	0.171666	1.0922	1.32606
MSMEG_0400	11.8024	15.2179	0.758356	13.988	14.0932	13.4419	14.611	1.16908	5.25602	2.46323	-0.538308	0	-0.491663	1.25002	0.662732
MSMEG_0401	4.38146	10.8519	0.981906	9.44924	9.64842	8.95626	10.25	1.29374	5.25181	5.80958	-1.25702	0	-0.130197	1.1121	1.0242
MSMEG_0402	8.77989	14.5943	0.952687	12.8883	13.0798	12.5744	13.4917	0.917255	5.25468	4.87959	-1.29917	0	-0.264609	1.2173	0.889786
MSMEG_0403	3.44103	11.7285	1.30598	9.56244	9.70365	9.08229	10.5802	1.49787	5.24752	5.07567	-1.16109	0	0.191254	1.11473	1.34565
MSMEG_0404	5.56468	10.016	0.962243	7.91024	8.03469	7.35239	8.58816	1.23577	5.24997	2.59714	-0.369493	0	-0.123454	1.0857	1.03094
MSMEG_0405	3.76641	7.83061	0.764176	5.56581	5.5807	5.14597	5.97533	0.829358	5.2481	3.35461	0.179047	0	-0.352018	1.11619	0.802378
MSMEG_0406	5.44918	14.0685	1.5659	10.4728	10.7256	9.41126	11.5148	2.10359	5.24586	3.42933	-0.613023	0	0.426777	1.13913	1.58117
MSMEG_0407	1.5038	7.04943	1.34273	3.79511	3.52681	2.61136	4.99184	2.38048	5.19557	2.1945	0.393609	0	0.120068	1.22266	1.27446
MSMEG_0408	6.84212	11.8793	1.02715	10.1461	10.4028	9.58508	10.7896	1.20453	5.25218	4.03905	-1.03956	0	-0.10262	1.12977	1.05178
MSMEG_0409	4.71079	10.3139	1.25475	7.49853	7.65883	6.58399	8.24158	1.65759	5.24336	2.41677	-0.0646358	0	0.178316	1.07644	1.33271
MSMEG_0410	5.48518	10.2147	1.0631	8.60138	8.71133	7.84092	9.51429	1.67337	5.24965	2.65456	-0.596937	0	-0.0330778	1.09617	1.12132
MSMEG_0411	4.27073	9.01195	0.926013	7.44786	7.54368	7.02997	8.18003	1.15007	5.24952	2.90738	-0.696458	0	-0.149565	1.07558	1.00483
MSMEG_0412	8.84204	12.1617	0.625852	10.6715	10.7768	10.3365	11.0331	0.696621	5.25577	3.12811	-0.415295	0	-0.519234	1.14509	0.635162
MSMEG_0413	1.85456	7.0915	1.1657	4.24572	4.18689	3.36084	5.1363	1.77547	5.21947	2.3577	0.172799	0	-0.0346125	1.20031	1.11978
MSMEG_0414	2.50854	7.20516	0.946417	4.55126	4.41778	3.91087	5.19093	1.28006	5.23632	2.83506	0.491486	0	-0.233511	1.17993	0.920885
MSMEG_0415	4.51009	13.2528	1.07703	8.79824	8.8734	8.29396	9.33845	1.04449	5.2499	6.5191	-0.0440311	0	-0.0222006	1.09923	1.13219
MSMEG_0416	5.74307	15.7044	2.01424	9.46385	9.06278	8.28098	10.9274	2.64643	5.23549	3.09082	0.62013	0	0.9018	1.11244	2.0562
MSMEG_0417	1.74371	11.5459	1.92763	5.38437	4.89206	3.91707	6.65129	2.73422	5.19573	3.32525	0.730178	0	0.801851	1.12578	1.95625
MSMEG_0418	1.376	9.90365	1.75584	4.0276	3.33053	2.75441	5.05508	2.30067	5.17152	3.95363	1.19042	0	0.544085	1.21175	1.69848
MSMEG_0419	0.4202	9.99454	2.0068	3.56427	2.81665	2.16039	4.62032	2.45993	5.11393	3.67597	1.14563	0	0.773024	1.23378	1.92742
MSMEG_0420	0	10.844	2.38297	2.99659	2.0251	1.23098	4.44867	3.21768	4.97562	3.76703	1.22943	0.00520833	1.14291	1.24006	2.2973
MSMEG_0422	4.76511	12.3633	0.971422	7.61625	7.53113	6.94128	8.29559	1.35431	5.24949	5.0444	0.524487	0	-0.10738	1.0788	1.04702
MSMEG_0423	5.18594	11.8221	0.840691	6.97259	6.94314	6.21036	7.62591	1.41556	5.2504	7.15404	0.807953	0	-0.234781	1.07547	0.919615
MSMEG_0424	3.25657	12.9625	2.07157	7.31584	6.78689	5.94204	7.88789	1.94585	5.22058	3.89326	1.21559	0	0.997624	1.07395	2.15202
MSMEG_0425	1.15283	6.67309	0.996458	2.73052	2.48631	2.14356	3.14366	1.00009	5.19826	6.47465	1.62977	0	-0.242051	1.23851	0.912345
MSMEG_0426	0.601381	7.49987	1.02213	2.93181	2.90133	2.51509	3.29614	0.781052	5.2023	10.6307	1.92963	0	-0.217419	1.23955	0.936976
MSMEG_0427	1.64392	12.8128	2.49141	4.04471	3.24224	2.74832	3.84261	1.0943	5.11118	6.70366	2.13283	0	1.28049	1.21092	2.43489
MSMEG_0428	0	9.45691	2.02273	2.0437	1.36368	0.872475	2.18178	1.3093	4.88669	6.66315	2.05178	0.0104167	0.778618	1.24411	1.93301
MSMEG_0429	1.77099	8.03416	1.297	4.88799	4.93402	3.98568	5.76518	1.7795	5.22137	2.6216	0.0253654	0	0.139859	1.15714	1.29425
MSMEG_0430	0	8.61305	2.05956	3.4624	2.93348	2.15482	4.31257	2.15775	5.07472	2.9733	0.742517	0.03125	0.821991	1.23757	1.97639
MSMEG_0431	0.472986	9.51894	2.03021	3.56221	3.3048	1.95688	4.73505	2.77816	5.10373	3.42796	0.952525	0	0.796339	1.23387	1.95073
MSMEG_0432	0.693322	11.0156	2.2277	4.23931	3.66352	2.74524	4.84681	2.10156	5.13576	4.36787	1.38036	0	1.02702	1.20068	2.18142
MSMEG_0433	0.697452	10.771	1.97203	3.92221	3.37843	2.76096	4.01228	1.25132	5.15063	6.01968	1.77859	0	0.755266	1.21676	1.90966
MSMEG_0434	5.44184	11.6559	1.15664	7.96693	7.75911	7.08916	8.74879	1.65963	5.24725	2.96163	0.661201	0	0.0696545	1.08698	1.22405
MSMEG_0435	2.6448	11.8203	1.68271	7.39927	7.28067	6.2604	8.28776	2.02736	5.2317	3.2699	0.34398	0	0.607847	1.07487	1.76224
MSMEG_0436	2.47995	11.2648	1.67147	6.95188	6.67415	5.82473	8.03232	2.20759	5.22848	2.93942	0.262393	0	0.595736	1.07573	1.75013
MSMEG_0437	4.68471	8.59325	0.733078	6.69506	6.75721	6.35785	7.11651	0.758662	5.25136	3.54005	-0.573188	0	-0.345491	1.07857	0.808905
MSMEG_0438	5.21332	9.87926	0.850742	7.86275	7.79797	7.34105	8.38511	1.04406	5.25163	3.18837	-0.0387053	0	-0.233842	1.08458	0.920553
MSMEG_0439	3.66435	8.18489	0.854655	5.65707	5.65982	5.11411	6.30482	1.19071	5.24607	3.25973	0.119712	0	-0.257198	1.11185	0.897197
MSMEG_0441	4.49959	8.40015	0.654401	6.99802	7.06067	6.4982	7.51606	1.01786	5.25308	3.30371	-0.333866	0	-0.420741	1.07514	0.733654
MSMEG_0442	0.235768	5.33651	0.961332	1.93161	1.73147	1.33139	2.31624	0.984856	5.14671	6.00193	1.51684	0	-0.282612	1.24394	0.871784
MSMEG_0443	1.09903	9.08421	1.44108	5.32664	5.40391	4.57958	6.22544	1.64586	5.21776	3.87591	-0.312561	0	0.311919	1.12916	1.46631
MSMEG_0444	0.264322	6.11478	1.07825	3.01902	3.06126	2.51399	3.66049	1.14649	5.18745	3.89274	-0.0145621	0	-0.161991	1.24024	0.992404
MSMEG_0445	2.68591	8.02229	1.01301	5.52162	5.63769	4.93807	6.28303	1.34496	5.24005	2.9451	-0.384687	0	-0.105385	1.1184	1.04901
MSMEG_0446	3.11825	7.53064	0.955331	5.63572	5.75726	5.05197	6.28151	1.22954	5.24272	2.53197	-0.358179	0	-0.157514	1.11285	0.996882
MSMEG_0447	0.99577	10.0796	1.37358	4.72693	4.66078	3.88196	5.50077	1.61881	5.21471	4.62091	0.435968	0	0.205771	1.16781	1.36017
MSMEG_0448	3.10704	8.86846	0.900564	5.39999	5.36217	4.89283	5.80262	0.909795	5.24379	4.43528	0.505166	0	-0.224331	1.12489	0.930064
MSMEG_0449	5.33163	12.8511	1.50066	9.12379	9.16976	7.91432	10.2724	2.35812	5.24387	2.47033	-0.0257529	0	0.395487	1.10517	1.54988
MSMEG_0450	0	9.1931	2.76958	3.23346	1.93444	0.816365	5.93125	5.11488	4.87714	1.77305	0.547172	0.0104167	1.52862	1.24096	2.68301
MSMEG_0451	3.79913	11.8177	1.80965	8.10546	8.58612	6.84539	9.28943	2.44404	5.2314	2.44078	-0.386512	0	0.719892	1.08976	1.87429
MSMEG_0452	0.956678	9.31496	1.60007	4.87947	4.88204	3.54822	6.09439	2.54617	5.20223	2.42536	0.131841	0	0.442381	1.15769	1.59678
MSMEG_0453	0	7.12331	1.60252	3.2113	3.47826	1.81254	4.29826	2.48572	5.11291	2.34422	-0.117413	0.00520833	0.361514	1.24101	1.51591
MSMEG_0454	4.03701	8.70381	0.748167	6.10028	6.08856	5.60593	6.64815	1.04222	5.24998	3.37282	0.0837164	0	-0.344942	1.09311	0.809453
MSMEG_0455	4.74916	9.00259	0.679461	6.23049	6.09327	5.84103	6.64933	0.808293	5.2517	4.4468	0.754999	0	-0.408555	1.08802	0.74584
MSMEG_0456	4.57656	11.6288	1.15921	8.98709	9.15735	8.36503	9.75587	1.39084	5.24892	3.6021	-0.579466	0	0.0566598	1.10255	1.21106
MSMEG_0457	5.59212	10.7754	1.04709	8.84857	9.1297	8.26861	9.56346	1.29485	5.25022	3.5124	-0.882243	0	-0.0529963	1.10008	1.1014
MSMEG_0458	3.00345	8.50581	0.864867	4.88887	4.88257	4.45911	5.2544	0.795283	5.2428	8.02426	1.48985	0	-0.292213	1.15708	0.862183
MSMEG_0459	1.68268	7.40826	0.972585	3.83779	3.7852	3.19324	4.32565	1.13241	5.22684	5.70386	1.03619	0	-0.248095	1.22068	0.9063
MSMEG_0460	4.45584	7.4355	0.570921	5.99718	6.01708	5.5868	6.39199	0.80519	5.25298	2.87962	0.0757735	0	-0.526404	1.09733	0.627991
MSMEG_0461	0.685811	6.25841	0.941504	2.47767	2.40054	1.94301	2.99989	1.05689	5.19055	7.29923	1.41932	0	-0.299523	1.24103	0.854873
MSMEG_0462	0	6.07633	1.12396	1.74203	1.61345	0.865443	2.28305	1.41761	5.05621	5.56643	1.25491	0.0208333	-0.119024	1.24298	1.03537
MSMEG_0463	1.83526	8.32739	1.18951	4.36944	4.37085	3.56962	4.96364	1.39401	5.22106	4.10898	0.60483	0	-0.00321886	1.19273	1.15118
MSMEG_0464	5.74452	8.90295	0.643328	7.72304	7.90833	7.37861	8.17454	0.795929	5.25396	3.07839	-0.756318	0	-0.437915	1.08124	0.71648
MSMEG_0465	4.00178	7.92047	0.824783	5.86632	5.92233	5.26863	6.37601	1.10739	5.24759	2.88582	0.0401664	0	-0.277934	1.10272	0.876462
MSMEG_0466	1.56124	6.93607	1.13457	4.37648	4.31473	3.70451	5.06392	1.35942	5.22343	2.76553	0.16599	0	-0.0577007	1.19227	1.09669
MSMEG_0467	0	8.0597	1.57022	3.29228	3.10371	2.17706	4.21094	2.03388	5.13943	3.98795	0.732685	0.0208333	0.329581	1.24064	1.48398
MSMEG_0468	0	7.59395	1.6809	2.30037	1.93707	0.976698	3.33548	2.35878	4.99512	4.03923	1.07969	0.046875	0.437808	1.24309	1.5922
MSMEG_0469	3.32384	9.13853	1.28528	5.94501	5.93564	4.85953	6.88487	2.02534	5.23413	2.34552	0.177812	0	0.185821	1.09946	1.34022
MSMEG_0470	1.25057	7.34278	1.31009	3.47906	3.13463	2.645	4.25792	1.61291	5.1909	3.65841	0.969141	0	0.0730233	1.23707	1.22742
MSMEG_0471	1.12288	6.42197	0.889319	2.92705	2.78334	2.403	3.32131	0.918312	5.21557	6.91773	1.56999	0	-0.350188	1.23951	0.804207
MSMEG_0472	1.72405	8.87303	1.6215	4.94775	4.77493	3.85712	5.84972	1.9926	5.20374	2.78513	0.386341	0	0.468241	1.15325	1.62264
MSMEG_0473	0.718802	7.70087	1.47052	4.15024	4.26305	3.18155	5.13695	1.9554	5.18912	2.81003	-0.140375	0	0.264956	1.20556	1.41935
MSMEG_0474	0	7.43794	1.45411	2.61111	2.34602	1.71062	3.06163	1.35101	5.11764	5.38055	1.46938	0.00520833	0.215083	1.23903	1.36948
MSMEG_0475	0.660252	6.51404	1.15615	2.47857	2.318	1.76088	2.87897	1.11809	5.16044	5.6078	1.48518	0	-0.0848675	1.24101	1.06953
MSMEG_0476	1.02556	7.48551	1.18073	3.30603	3.09373	2.62457	3.80242	1.17785	5.19886	5.45171	1.32601	0	-0.0597792	1.24051	1.09462
MSMEG_0478	3.57927	9.26742	1.04981	5.64064	5.49107	4.99952	6.0186	1.01908	5.24117	5.19146	1.23538	0	-0.06281	1.11262	1.09159
MSMEG_0480	0.93842	4.94468	0.772573	2.9792	2.95427	2.46001	3.48017	1.02017	5.22312	3.02254	0.11265	0	-0.467352	1.23993	0.687043
MSMEG_0481	0	8.23069	1.26963	3.10517	3.02277	2.38921	3.63102	1.24181	5.17829	7.77061	1.48785	0.00520833	0.0288403	1.24079	1.18324
MSMEG_0482	0.502099	6.05253	0.845266	2.33742	2.26976	1.8758	2.57358	0.69778	5.20074	10.6751	2.19209	0	-0.397495	1.24276	0.7569
MSMEG_0483	1.88491	7.85498	0.943022	4.04279	4.0023	3.53976	4.43533	0.895569	5.23169	7.18934	1.23674	0	-0.26799	1.21101	0.886405
MSMEG_0484	1.9219	6.47996	0.759503	4.30993	4.39884	3.98251	4.71358	0.731073	5.24146	4.44769	-0.222012	0	-0.436996	1.1965	0.7174
MSMEG_0485	2.46201	8.26131	0.935005	4.69612	4.61519	4.09386	5.13407	1.04021	5.23887	6.43621	1.32681	0	-0.234887	1.16989	0.919509
MSMEG_0486	0.823114	7.81079	1.18516	3.70107	3.45694	2.95341	4.3015	1.3481	5.2087	4.74174	1.01779	0	-0.0419231	1.22708	1.11247
MSMEG_0487	0	5.6045	0.867725	1.34567	1.21014	0.838142	1.58873	0.750588	5.09787	13.2203	2.81504	0.00520833	-0.371334	1.23906	0.783061
MSMEG_0488	0	6.36415	1.32775	2.11235	1.75253	1.24518	2.49225	1.24707	5.07465	4.05534	1.1948	0.0104167	0.0837087	1.24404	1.2381
MSMEG_0489	0	6.10333	1.3831	2.39974	2.01873	1.43032	3.03624	1.60592	5.0952	2.94737	0.811335	0.00520833	0.141016	1.24209	1.29541
MSMEG_0490	0.758328	6.39877	1.03135	3.40931	3.29252	2.6951	4.05173	1.35663	5.21085	3.3762	0.298753	0	-0.207574	1.23892	0.946821
MSMEG_0491	3.45693	7.99022	0.852984	6.03927	6.00001	5.55195	6.60632	1.05437	5.24743	3.04335	-0.0758711	0	-0.242623	1.09561	0.911772
MSMEG_0492	2.66813	6.26733	0.696077	4.54944	4.57071	4.03682	5.01483	0.978013	5.24569	3.08822	-0.0188813	0	-0.48398	1.18006	0.670416
MSMEG_0493	0	8.49576	1.8393	3.21376	3.03226	1.98368	4.19995	2.21628	5.08465	3.1687	0.598848	0.0104167	0.598291	1.24101	1.75269
MSMEG_0494	0	8.72417	1.71956	3.29239	3.04907	2.20426	3.77725	1.57299	5.12427	4.094	1.00335	0.0104167	0.47892	1.24064	1.63332
MSMEG_0495	0	8.7223	1.41913	3.18141	3.06724	2.3116	3.74799	1.43639	5.16152	6.86634	1.33737	0.0104167	0.178113	1.24102	1.33251
MSMEG_0496	0	5.19488	0.970295	1.30735	1.08602	0.643022	1.83441	1.19139	4.99053	5.97596	1.42587	0.0729167	-0.268303	1.2386	0.886092
MSMEG_0497	1.15278	8.79507	1.2345	4.30702	4.17176	3.46619	4.96861	1.50242	5.21892	5.79241	1.20841	0	0.0378199	1.19668	1.19222
MSMEG_0499	0.590785	8.98981	1.30934	3.58989	3.56454	2.82926	4.04559	1.21633	5.19705	8.62642	1.72015	0	0.0767925	1.23255	1.23119
MSMEG_0500	0.70524	7.25458	1.16205	4.12161	4.13639	3.23497	4.82602	1.59105	5.21661	3.30502	0.173857	0	-0.0450047	1.20705	1.10939
MSMEG_0501	1.16125	7.61351	1.03552	3.77484	3.71645	3.24691	4.09545	0.848536	5.22153	5.51538	1.0543	0	-0.188085	1.2236	0.96631
MSMEG_0502	1.74335	8.51527	1.11079	4.62839	4.48982	4.04706	4.97371	0.926653	5.23001	4.80333	0.994528	0	-0.0637469	1.17453	1.09065
MSMEG_0503	0.744821	7.75742	1.13612	3.60463	3.54908	2.89607	4.0413	1.14522	5.2096	4.77084	0.90609	0	-0.0956784	1.2318	1.05872
MSMEG_0504	2.72645	10.2552	1.25166	5.14737	5.07563	4.35981	5.68678	1.32697	5.22927	4.54691	0.933678	0	0.1112	1.14046	1.2656
MSMEG_0505	1.97673	8.19741	1.12993	5.07865	5.09534	4.25441	5.52469	1.27029	5.23321	3.59321	0.562338	0	-0.0149165	1.14485	1.13948
MSMEG_0506	0.473045	6.37773	1.04938	3.10738	2.97939	2.40893	3.61614	1.20721	5.20221	4.30157	0.854309	0	-0.191421	1.2408	0.962975
MSMEG_0507	0.258409	5.60337	1.00862	2.40635	2.30392	1.71356	2.83177	1.11821	5.17437	4.23846	1.01479	0	-0.233391	1.24201	0.921005
MSMEG_0508	0.748219	7.83883	1.20289	4.4629	4.28416	3.64813	5.19172	1.54359	5.22119	3.6414	0.47303	0	0.016615	1.18627	1.17101
MSMEG_0509	1.03678	7.78003	1.21825	3.64221	3.66259	2.8018	4.40005	1.59826	5.20261	4.57262	0.737042	0	-0.0116787	1.22993	1.14272
MSMEG_0510	0	8.42192	1.4193	2.34436	2.12096	1.55305	2.79261	1.23956	5.1022	9.74869	2.15593	0.00520833	0.176609	1.24269	1.331
MSMEG_0511	0	7.35976	1.26353	1.70827	1.60536	1.05184	2.02423	0.972398	5.0169	10.9537	2.33517	0.0625	0.0208003	1.24273	1.1752
MSMEG_0512	0	6.22263	1.01819	1.62562	1.49546	1.07145	1.90578	0.834332	5.09855	10.7506	2.41275	0.00520833	-0.223855	1.24204	0.930541
MSMEG_0513	0	7.37375	1.24692	2.00854	1.80128	1.30308	2.36979	1.06671	5.09375	9.67669	2.16915	0.0104167	0.00282502	1.2441	1.15722
MSMEG_0514	0.507727	7.60384	1.18646	2.7752	2.66485	2.17263	3.13733	0.964698	5.17528	8.3943	1.78217	0	-0.0521292	1.23859	1.10227
MSMEG_0515	0.454774	7.4531	1.01351	3.54422	3.45279	2.9383	3.97826	1.03996	5.21833	6.90432	1.22304	0	-0.221152	1.23466	0.933243
MSMEG_0516	0.21287	5.70412	0.915883	1.46283	1.3014	0.931413	1.76151	0.830096	5.10118	11.596	2.52174	0	-0.324523	1.24041	0.829872
MSMEG_0517	0	7.2267	1.12949	2.50847	2.29286	1.83853	3.07072	1.23219	5.1654	8.24225	1.74032	0.00520833	-0.111047	1.24054	1.04335
MSMEG_0518	1.40669	6.29742	0.894666	3.37039	3.22284	2.74951	3.74788	0.998366	5.22421	4.2752	1.02664	0	-0.345003	1.23967	0.809393
MSMEG_0520	1.92807	8.6527	1.43359	4.49359	4.27955	3.52087	5.35619	1.83532	5.20716	2.57717	0.437329	0	0.249544	1.18405	1.40394
MSMEG_0521	0	11.8931	2.11794	6.7221	7.01911	5.52755	8.18837	2.66082	5.20039	3.2639	-0.417774	0.0104167	1.03968	1.07826	2.19407
MSMEG_0522	0	8.75124	1.97044	4.51925	4.6792	3.19235	6.03628	2.84393	5.1496	2.33736	-0.134253	0.0104167	0.78824	1.1822	1.94264
MSMEG_0523	2.59148	9.69886	1.40408	5.18738	4.96003	4.101	6.08082	1.97982	5.22229	3.13839	0.726354	0	0.26617	1.13791	1.42057
MSMEG_0524	0.633518	5.95031	0.894174	2.13273	1.92794	1.63546	2.42818	0.792721	5.18378	9.6567	2.22748	0	-0.349821	1.244	0.804574
MSMEG_0526	0.664048	7.32238	1.08525	2.72415	2.65889	2.16845	3.19137	1.02292	5.18452	8.6992	1.64474	0	-0.153256	1.23851	1.00114
MSMEG_0527	0.260384	6.28511	1.08666	1.65135	1.47518	1.03242	1.88871	0.856293	5.08688	9.95973	2.4056	0	-0.155612	1.24227	0.998783
MSMEG_0528	0	7.07054	1.24858	1.75719	1.51381	0.995925	2.15726	1.16133	5.04961	9.51249	2.22389	0.0104167	0.0054915	1.24309	1.15989
MSMEG_0529	5.0296	10.8285	1.19046	7.70004	7.48567	6.86884	8.54848	1.67964	5.24567	2.48578	0.285085	0	0.109761	1.0807	1.26416
MSMEG_0530	3.67479	11.3513	1.42914	8.23405	8.24162	7.31248	9.25412	1.94163	5.24176	3.51557	-0.487378	0	0.33751	1.09163	1.49191
MSMEG_0531	2.62075	9.01719	1.62207	6.65611	6.97698	5.80794	7.95825	2.15031	5.22494	2.69272	-0.802582	0	0.543036	1.07903	1.69743
MSMEG_0532	0.329261	7.34144	1.76265	4.54563	5.13676	3.32225	5.87032	2.54807	5.16708	2.4851	-0.711268	0	0.582322	1.18033	1.73672
MSMEG_0533	1.06186	6.86892	1.21262	3.63069	3.38674	2.85459	4.29356	1.43897	5.20357	3.30635	0.733893	0	-0.0178812	1.2305	1.13651
MSMEG_0534	1.74681	9.87607	1.47043	4.38034	4.07118	3.45017	5.04418	1.59401	5.20651	5.73389	1.45694	0	0.278417	1.19201	1.43281
MSMEG_0535	2.16309	10.6181	1.78659	6.09692	5.93144	4.70334	7.4561	2.75276	5.21427	2.31934	0.215428	0	0.693339	1.09325	1.84773
MSMEG_0536	4.70135	11.3915	1.7369	8.08022	8.31631	6.81848	9.447	2.62853	5.23365	2.06376	-0.278607	0	0.647601	1.0893	1.802
MSMEG_0537	4.69433	11.0767	1.37025	7.91483	7.8254	6.90027	8.9181	2.01783	5.24262	2.44496	0.245528	0	0.284445	1.0858	1.43884
MSMEG_0538	4.42779	11.4636	1.60396	7.2478	6.91971	6.1293	8.33616	2.20686	5.23365	2.66624	0.551316	0	0.530422	1.07353	1.68482
MSMEG_0539	3.4847	8.83862	1.04175	6.54924	6.62611	5.93673	7.37785	1.44111	5.24451	2.9521	-0.334931	0	-0.038741	1.08049	1.11565
MSMEG_0540	3.02137	5.77355	0.538323	4.54306	4.49989	4.16445	4.9049	0.74045	5.25052	2.80106	0.200709	0	-0.642186	1.18051	0.51221
MSMEG_0541	2.89875	8.85706	1.2958	5.31652	5.08439	4.3893	5.96443	1.57512	5.22911	3.22315	0.816254	0	0.166033	1.12977	1.32043
MSMEG_0542	4.284	9.12733	0.947794	6.60613	6.35904	5.89419	7.49837	1.60418	5.24731	2.39189	0.27314	0	-0.131877	1.07967	1.02252
MSMEG_0543	1.70493	8.26185	0.963413	4.9771	4.94792	4.40907	5.52035	1.11128	5.23894	5.30875	0.562899	0	-0.187946	1.15136	0.966449
MSMEG_0544	4.36908	7.78452	0.779565	6.13032	6.18425	5.43189	6.64153	1.20963	5.24942	2.12811	0.0286512	0	-0.312307	1.09187	0.842088
MSMEG_0545	1.53252	7.05427	0.961347	3.60028	3.37462	2.92434	4.14286	1.21852	5.223	3.23343	0.674366	0	-0.270675	1.23202	0.883721
MSMEG_0546	2.39728	11.3192	1.63852	5.98696	5.64306	4.77671	7.45819	2.68148	5.22024	2.54497	0.339688	0	0.540776	1.09774	1.69517
MSMEG_0547	0	4.92611	1.05373	2.16688	2.06348	1.47981	2.84841	1.3686	5.12383	2.82593	0.253015	0.0364583	-0.190153	1.24389	0.964242
MSMEG_0548	1.65737	6.94413	0.920373	4.12242	4.11239	3.44147	4.71079	1.26932	5.23269	3.59459	0.374515	0	-0.28664	1.20701	0.867756
MSMEG_0549	2.50702	8.89595	1.6945	6.17822	6.52787	4.94741	7.4809	2.5335	5.21709	2.15993	-0.497496	0	0.604577	1.08993	1.75897
MSMEG_0550	2.44669	9.24836	1.76649	6.46774	6.64789	5.18288	8.07523	2.89235	5.21787	2.1297	-0.374396	0	0.684619	1.08187	1.83901
MSMEG_0551	1.76843	8.18117	1.48638	4.81064	4.94786	3.47397	5.90311	2.42914	5.208	2.13052	-0.0469991	0	0.324157	1.16222	1.47855
MSMEG_0552	1.20075	7.85643	1.00811	5.32161	5.3783	4.67322	6.00999	1.33676	5.23829	3.82683	-0.663589	0	-0.121346	1.12946	1.03305
MSMEG_0553	1.6661	8.91772	1.31587	5.08781	5.17558	4.30965	5.91798	1.60833	5.22258	3.81907	-0.0140258	0	0.171612	1.14426	1.32601
MSMEG_0554	0	7.32158	1.39469	2.22267	2.03879	1.21033	2.93781	1.72748	5.05697	5.42537	1.12616	0.0416667	0.15106	1.24363	1.30546
MSMEG_0555	0	6.70255	1.25286	1.81902	1.62161	0.966524	2.33369	1.36717	5.03828	7.03779	1.652	0.0364583	0.00939715	1.24346	1.16379
MSMEG_0556	0	7.19292	1.21814	2.43913	2.25712	1.66328	3.06653	1.40325	5.14161	6.99652	1.49146	0.00520833	-0.0234381	1.24158	1.13096
MSMEG_0558	4.62212	9.98699	1.14979	7.42544	7.42139	6.62046	8.1698	1.54935	5.24542	2.57254	-0.0343103	0	0.0745509	1.07524	1.22895
MSMEG_0559	7.63261	14.4378	1.37779	11.2706	11.2257	10.2533	12.3357	2.08239	5.25	2.63812	-0.0382952	0	0.213796	1.16399	1.36819
MSMEG_0560	1.55551	8.30871	1.59876	4.67878	4.50452	3.60077	5.64785	2.04708	5.19861	2.48948	0.308877	0	0.427691	1.17107	1.58209
MSMEG_0561	0.975555	7.92329	1.06514	4.88679	4.86883	4.27378	5.57259	1.29881	5.23293	3.95766	-0.00646204	0	-0.0920729	1.15722	1.06232
MSMEG_0562	5.26865	8.28903	0.596075	6.63921	6.69226	6.17711	6.98279	0.805687	5.2535	2.92204	0.210543	0	-0.483166	1.07924	0.67123
MSMEG_0563	2.657	6.08468	0.718247	4.60065	4.64398	4.07584	5.16193	1.08609	5.24509	2.49504	-0.234131	0	-0.458212	1.17646	0.696183
MSMEG_0564	3.5836	7.99637	0.82685	5.72363	5.87888	5.25507	6.21386	0.958786	5.24692	3.5292	-0.13448	0	-0.281995	1.10884	0.872401
MSMEG_0565	1.82673	7.96127	1.22993	3.85907	3.64072	3.02901	4.28505	1.25604	5.21065	4.24689	1.17953	0	0.0102328	1.21969	1.16463
MSMEG_0566	2.66809	9.21065	1.12368	4.98285	4.82496	4.26221	5.3371	1.07489	5.23377	5.45232	1.29841	0	-0.0273124	1.15099	1.12708
MSMEG_0567	0.202858	11.0946	2.21211	3.35445	2.67576	1.92438	3.78246	1.85807	5.07381	5.00364	1.59353	0	0.972191	1.23992	2.12659
MSMEG_0568	0	11.0747	2.46761	2.39855	1.53812	0.909761	2.44599	1.53623	4.837	5.18779	1.76519	0.0364583	1.22551	1.2421	2.37991
MSMEG_0569	0	10.4019	2.23151	2.15914	1.32567	0.868826	2.10791	1.23909	4.84812	5.58151	1.86322	0.0104167	0.987599	1.24391	2.14199
MSMEG_0571	0	11.5309	2.53939	2.27842	1.33543	0.643697	2.34093	1.69723	4.76286	5.14901	1.73555	0.0208333	1.29612	1.24327	2.45052
MSMEG_0572	0	11.9584	2.45157	2.87469	1.97725	1.27434	3.61644	2.34211	4.94695	4.8873	1.54062	0.015625	1.21246	1.23911	2.36685
MSMEG_0573	0	5.61695	0.93968	0.769647	0.589212	0.326711	0.830072	0.503361	4.78142	18.1613	3.66345	0.09375	-0.292506	1.23219	0.861889
MSMEG_0574	1.92449	6.95295	0.970694	4.02632	3.81653	3.48187	4.40011	0.918245	5.22951	3.85024	0.80471	0	-0.241122	1.21182	0.913273
MSMEG_0575	0	9.02698	1.82153	5.25804	5.41466	3.97835	6.59204	2.61369	5.18883	2.94526	-0.260025	0.0104167	0.688119	1.13341	1.84251
MSMEG_0576	2.16854	11.5229	1.81576	7.07506	7.14971	5.84503	8.23493	2.3899	5.22306	2.95564	-0.151852	0	0.741654	1.07411	1.89605
MSMEG_0577	0.924992	6.88912	0.889505	3.06982	2.90767	2.62541	3.4397	0.814291	5.21954	9.176	1.83645	0	-0.351084	1.24059	0.803311
MSMEG_0578	1.13182	6.83816	0.925636	2.79688	2.79546	2.3034	3.16801	0.864601	5.20801	9.32758	1.79605	0	-0.31303	1.23867	0.841365
MSMEG_0579	2.97286	7.96964	0.926206	4.91413	4.91449	4.25869	5.50421	1.24552	5.24008	4.1637	0.565832	0	-0.229228	1.15543	0.925167
MSMEG_0580	4.11619	8.07869	0.74269	6.53823	6.65477	6.20397	6.99444	0.790463	5.25082	3.84261	-0.820414	0	-0.33797	1.08066	0.816425
MSMEG_0581	0.691687	9.54302	1.58894	3.59584	3.37704	2.48922	4.07988	1.59066	5.16758	4.66682	1.20727	0	0.35669	1.23225	1.51109
MSMEG_0582	1.62382	10.0632	1.56422	4.54953	4.48765	3.487	5.10542	1.61842	5.201	4.16553	0.900443	0	0.384167	1.18005	1.53856
MSMEG_0583	0	7.38463	1.48804	3.04022	2.74879	1.86198	3.93423	2.07225	5.1354	2.58485	0.494512	0.00520833	0.247649	1.24039	1.40204
MSMEG_0584	2.89958	13.7525	1.83336	9.00595	8.98283	8.24126	10.1485	1.90727	5.23528	4.21569	-0.578962	0	0.730457	1.1029	1.88485
MSMEG_0586	5.19089	14.5381	1.74161	9.45645	9.42876	8.46859	10.4191	1.95053	5.24023	3.40176	-0.0469456	0	0.629348	1.11227	1.78374
MSMEG_0587	0.281364	6.1227	1.3468	3.01598	2.93498	2.04236	4.00934	1.96698	5.15263	2.38741	0.233963	0	0.10659	1.24021	1.26099
MSMEG_0588	0.564779	6.11777	0.976299	2.72241	2.62285	2.0982	3.17981	1.08161	5.19625	5.57384	1.10787	0	-0.262209	1.23851	0.892187
MSMEG_0589	2.06434	7.72106	0.984905	4.36079	4.33017	3.63517	4.98564	1.35047	5.23307	4.51653	0.907856	0	-0.208387	1.19329	0.946008
MSMEG_0590	1.89418	8.96803	1.22111	4.64599	4.56845	3.74295	5.36032	1.61736	5.22425	4.46687	0.844859	0	0.0477911	1.17332	1.20219
MSMEG_0591	1.28384	7.55728	1.02648	3.5662	3.57081	3.0271	3.95291	0.925807	5.21865	7.30438	1.366	0	-0.207212	1.23369	0.947183
MSMEG_0592	2.2406	7.02815	0.813872	4.60469	4.61412	4.09933	5.04766	0.948331	5.24174	3.84061	0.115557	0	-0.362305	1.17618	0.79209
MSMEG_0593	2.94081	7.81655	0.908035	5.59691	5.64321	4.91389	6.20353	1.28964	5.24415	2.73543	-0.123036	0	-0.206649	1.11468	0.947747
MSMEG_0594	6.17954	10.1681	0.927857	7.83393	7.72964	7.17374	8.51559	1.34185	5.25059	2.53018	0.420812	0	-0.15604	1.0839	0.998355
MSMEG_0595	3.70777	9.34537	1.00006	6.82338	6.76855	6.0797	7.34739	1.26769	5.24692	3.07855	0.429939	0	-0.0771097	1.07717	1.07729
MSMEG_0596	1.75066	7.49238	1.06333	4.95032	4.90341	4.32847	5.63116	1.30269	5.23383	3.18149	-0.0447553	0	-0.0897578	1.15309	1.06464
MSMEG_0597	4.44315	9.47775	0.859026	6.13278	5.93332	5.51003	6.69478	1.18475	5.24799	4.173	0.811142	0	-0.232744	1.09177	0.921651
MSMEG_0598	1.75117	7.69678	0.991249	5.33883	5.39753	4.72856	6.10918	1.38062	5.23945	3.22478	-0.462763	0	-0.13718	1.12843	1.01722
MSMEG_0599	3.76971	9.37105	1.21725	7.13497	7.23035	6.22127	8.15193	1.93066	5.24254	2.50561	-0.340961	0	0.143639	1.07362	1.29803
MSMEG_0600	3.69194	9.43351	1.19528	6.61149	6.61634	5.74112	7.43131	1.69018	5.2411	2.64317	0.104583	0	0.115683	1.0796	1.27008
MSMEG_0601	1.34943	10.2107	1.52502	5.90989	6.15093	5.25284	6.91659	1.66374	5.22141	3.1518	-0.507507	0	0.424116	1.10091	1.57851
MSMEG_0602	3.238	11.2442	1.69849	7.60813	7.50731	6.41031	8.798	2.38769	5.23244	2.4039	0.137484	0	0.619861	1.07863	1.77426
MSMEG_0603	4.53086	9.87727	1.04166	6.40454	6.18034	5.58801	7.1837	1.59569	5.24445	2.45912	0.338593	0	-0.0415064	1.08317	1.11289
MSMEG_0604	0.707035	6.7927	1.20532	3.58032	3.68557	2.6083	4.31171	1.70341	5.19862	2.88553	0.140912	0	-0.0277012	1.23302	1.12669
MSMEG_0605	0.406218	5.61236	1.23187	3.36345	3.4936	2.43826	4.33151	1.89325	5.18449	2.2152	-0.196318	0	-0.00791701	1.23978	1.14648
MSMEG_0606	0.440115	6.29465	1.15269	3.06691	3.04525	2.2422	3.85368	1.61148	5.18545	3.02735	0.368818	0	-0.0878788	1.24057	1.06652
MSMEG_0607	1.86198	6.63603	0.686695	4.72597	4.66886	4.27134	5.11869	0.847349	5.24683	4.6109	0.0832107	0	-0.481177	1.16787	0.673218
MSMEG_0608	5.68822	9.67015	0.891234	7.78067	7.76375	7.11765	8.36993	1.25229	5.25098	2.27437	0.184367	0	-0.191385	1.08262	0.963011
MSMEG_0609	3.27084	7.91204	0.973181	5.3891	5.29734	4.7549	6.17446	1.41956	5.24128	2.79719	0.250912	0	-0.152329	1.12551	1.00207
MSMEG_0610	0	6.52444	1.05331	1.53052	1.37756	0.929135	1.84831	0.919177	5.07322	13.1449	2.77625	0.0104167	-0.187819	1.24113	0.966577
MSMEG_0611	0	5.73674	0.917404	0.981818	0.852103	0.547163	1.10229	0.555127	4.97691	19.1297	3.78834	0.0104167	-0.317166	1.23457	0.837229
MSMEG_0612	0.912381	6.84666	0.985667	4.18187	4.09503	3.68118	4.76274	1.08156	5.2288	3.8654	0.0597039	0	-0.218204	1.20387	0.936192
MSMEG_0613	1.1461	6.11145	1.03489	3.11786	3.01765	2.46271	3.62456	1.16185	5.20306	3.38691	0.557181	0	-0.205959	1.24085	0.948436
MSMEG_0614	5.88311	9.29843	0.805984	7.43251	7.31651	6.78662	8.04765	1.26103	5.25169	2.25932	0.302699	0	-0.269358	1.07534	0.885038
MSMEG_0615	1.13278	7.21262	1.20848	4.33625	4.241	3.77102	5.09624	1.32522	5.21585	3.19995	-0.247523	0	0.0136139	1.19486	1.16801
MSMEG_0616	0.843117	7.47641	1.39818	4.02559	4.08419	3.04146	4.99404	1.95258	5.19474	2.44229	0.082509	0	0.186328	1.21185	1.34072
MSMEG_0617	2.99404	9.87871	1.61719	6.77346	7.00489	5.73204	7.90815	2.17611	5.22742	2.42368	-0.410387	0	0.539489	1.0777	1.69388
MSMEG_0618	0	4.17787	0.944208	1.63359	1.52542	0.99714	2.1294	1.13225	5.08408	2.94475	0.636397	0.0104167	-0.297907	1.24212	0.856488
MSMEG_0619	1.86567	8.85505	1.51291	5.37434	5.64726	4.13993	6.58717	2.44724	5.21576	2.3096	-0.238073	0	0.386558	1.12635	1.54095
MSMEG_0620	0.168716	9.14764	1.39308	4.10344	4.34839	3.2293	4.88854	1.65924	5.19469	3.40061	-0.124272	0	0.185091	1.20799	1.33949
MSMEG_0621	0	5.28744	1.12544	2.44843	2.63814	1.68302	3.25357	1.57055	5.13519	2.40718	-0.193685	0.00520833	-0.116018	1.24145	1.03838
MSMEG_0622	1.08153	8.80446	1.50709	5.38252	5.7965	4.40903	6.52491	2.11588	5.21361	2.95303	-0.709719	0	0.381205	1.12588	1.5356
MSMEG_0623	1.34172	8.59677	1.45892	5.15559	5.39194	4.22396	6.10212	1.87816	5.2139	2.96721	-0.431672	0	0.318986	1.13994	1.47338
MSMEG_0624	0.232041	7.67781	1.57364	4.82437	5.06852	3.67253	5.88916	2.21663	5.19493	3.10481	-0.701564	0	0.412327	1.16131	1.56672
MSMEG_0625	2.89881	7.11576	0.915317	4.86652	4.86265	4.21175	5.51744	1.30568	5.23979	2.58991	0.143106	0	-0.243223	1.15854	0.911172
MSMEG_0626	0.221101	6.53216	1.30712	3.64987	3.67838	2.79323	4.63436	1.84114	5.18591	2.72199	-0.264912	0	0.0775631	1.22956	1.23196
MSMEG_0627	1.31467	7.52569	1.34331	4.20251	4.47306	3.2572	5.13585	1.87865	5.20219	2.49239	-0.335587	0	0.14057	1.20274	1.29497
MSMEG_0628	3.14013	7.8763	1.08976	6.30182	6.63659	5.70097	7.09271	1.39173	5.24158	2.91185	-0.903784	0	0.00399222	1.08577	1.15839
MSMEG_0629	3.25101	7.4987	0.617717	5.59949	5.56239	5.26006	5.91347	0.653411	5.25139	5.66122	0.0976394	0	-0.496843	1.11456	0.657552
MSMEG_0630	0	6.23855	1.05559	2.6745	2.69849	2.08189	3.20996	1.12807	5.17703	4.60042	0.587276	0.00520833	-0.183014	1.2386	0.971381
MSMEG_0631	4.16545	7.89915	0.691855	5.87128	5.84135	5.40737	6.24577	0.838402	5.25066	3.47018	0.464826	0	-0.410655	1.10251	0.743741
MSMEG_0632	3.36063	6.48074	0.600888	4.60443	4.54786	4.19392	4.95691	0.762987	5.24915	3.68677	0.569122	0	-0.575307	1.1762	0.579088
MSMEG_0633	4.21109	8.53655	0.777239	6.49896	6.4418	6.02492	7.07218	1.04726	5.2503	2.98288	-0.0817131	0	-0.304071	1.08131	0.850324
MSMEG_0634	2.90258	8.25503	0.955105	5.06972	5.03761	4.43527	5.52132	1.08605	5.2401	4.03461	0.571482	0	-0.190312	1.14542	0.964084
MSMEG_0635	3.26075	8.94742	1.17148	6.10717	6.28165	5.10228	6.96885	1.86658	5.23903	2.33533	0.0850171	0	0.0786563	1.09283	1.23305
MSMEG_0636	4.11358	8.83039	1.0491	6.62896	6.72202	5.92118	7.27625	1.35506	5.2448	2.65922	-0.141557	0	-0.0302716	1.07937	1.12412
MSMEG_0637	2.04775	11.8539	2.26328	8.16143	8.60578	7.03906	10.0081	2.96903	5.21471	2.62572	-0.754134	0	1.1726	1.09067	2.327
MSMEG_0638	5.89237	9.94645	0.828836	8.06574	8.10832	7.69388	8.52099	0.827113	5.25217	3.01893	-0.243385	0	-0.260192	1.08903	0.894204
MSMEG_0639	6.81749	12.553	0.897725	9.91861	10.0003	9.41718	10.5064	1.08918	5.25331	4.39771	-0.659371	0	-0.225898	1.12362	0.928497
MSMEG_0640	5.28053	11.0299	0.96897	8.92742	8.96274	8.43866	9.5081	1.06944	5.25141	4.53193	-0.796761	0	-0.132493	1.10146	1.0219
MSMEG_0641	5.10249	11.4923	1.00204	9.15912	9.27629	8.60385	9.75725	1.15339	5.2513	4.59589	-0.813902	0	-0.103836	1.10588	1.05056
MSMEG_0642	5.29015	11.6745	1.02865	9.31695	9.43054	8.7574	9.96522	1.20782	5.25117	4.60483	-0.854767	0	-0.080523	1.10917	1.07387
MSMEG_0643	7.2961	13.4846	1.05233	11.268	11.3518	10.8837	11.9335	1.04984	5.25295	5.50251	-1.25027	0	-0.111577	1.16391	1.04282
MSMEG_0644	2.92588	8.30361	1.08421	6.38727	6.67352	5.80526	7.17247	1.3672	5.24205	3.5875	-0.978689	0	0.000654532	1.08356	1.15505
MSMEG_0645	5.69075	10.3644	0.922322	8.63538	8.74121	8.35781	9.10428	0.746475	5.25156	4.29604	-1.0441	0	-0.17435	1.09667	0.980045
MSMEG_0646	0.245803	5.82276	1.46626	2.30922	1.95718	1.04224	3.63122	2.58898	5.05999	2.21624	0.656925	0	0.223245	1.24302	1.37764
MSMEG_0647	0	5.80972	1.18181	1.46246	1.24679	0.568745	1.89131	1.32256	4.96656	5.92303	1.59515	0.0208333	-0.0585951	1.2404	1.0958
MSMEG_0649	0.38111	7.13991	1.34689	2.48572	2.27701	1.52385	3.06296	1.53911	5.11774	3.71588	0.968752	0	0.105988	1.2409	1.26038
MSMEG_0650	0	7.18158	1.37661	2.9852	2.86588	2.01145	3.89981	1.88836	5.14656	3.0482	0.432083	0.00520833	0.136634	1.23997	1.29103
MSMEG_0651	1.25539	8.03703	1.71464	4.82671	4.82796	3.52512	5.99021	2.46509	5.19181	2.20128	0.0625532	0	0.553484	1.16116	1.70788
MSMEG_0652	0.897885	5.40542	0.951234	3.23982	3.22942	2.63308	3.83587	1.20279	5.21231	2.8023	-0.0486027	0	-0.289708	1.24094	0.864688
MSMEG_0653	0	6.97862	1.14363	1.59581	1.45413	0.907222	1.97335	1.06613	5.05471	12.0853	2.61037	0.00520833	-0.098137	1.24177	1.05626
MSMEG_0654	0	6.26529	1.0661	1.30225	1.11316	0.643262	1.64009	0.99683	4.99806	12.3749	2.68974	0.0208333	-0.172439	1.23854	0.981956
MSMEG_0655	0.2521	6.24017	0.967581	2.06933	1.95302	1.53887	2.41939	0.880524	5.16185	9.22709	1.9922	0	-0.276522	1.2441	0.877874
MSMEG_0656	1.59546	6.97709	0.91303	4.00872	4.00426	3.41025	4.50885	1.09861	5.23183	3.79481	0.468224	0	-0.299637	1.21267	0.854758
MSMEG_0657	1.73319	7.3382	1.24203	3.88013	3.74302	2.95124	4.56523	1.61399	5.20848	3.34613	0.791003	0	0.0233099	1.21872	1.17771
MSMEG_0658	0	8.30124	1.7975	2.68712	2.08858	1.45373	3.45495	2.00122	5.05338	4.18278	1.2531	0.0104167	0.558936	1.23856	1.71333
MSMEG_0659	0	8.78719	1.91584	3.26386	2.72232	2.01124	4.22941	2.21817	5.08341	3.25825	0.831274	0.03125	0.67501	1.24083	1.82941
MSMEG_0660	1.26525	9.99408	1.72681	4.60154	4.31873	3.37625	5.50681	2.13057	5.19063	3.72406	0.899283	0	0.550414	1.1764	1.70481
MSMEG_0661	1.02189	8.73676	1.43625	3.85181	3.67391	2.76631	4.58668	1.82037	5.19172	4.00009	0.950369	0	0.216219	1.22003	1.37061
MSMEG_0662	2.38623	7.80514	1.1024	4.6885	4.50603	3.89893	5.14076	1.24183	5.23108	3.3298	0.835654	0	-0.0680051	1.17041	1.08639
MSMEG_0663	2.55779	6.16041	0.744465	4.09669	4.05516	3.59592	4.49579	0.899873	5.24137	3.52494	0.593699	0	-0.463864	1.20833	0.690532
MSMEG_0664	2.80647	9.22981	1.28844	5.1012	4.92372	4.1896	5.77681	1.58721	5.22727	4.2613	0.985985	0	0.14503	1.14341	1.29943
MSMEG_0665	1.09344	6.07181	1.06917	2.85518	2.7169	2.07661	3.35432	1.27771	5.1914	3.77348	0.948424	0	-0.169811	1.23898	0.984584
MSMEG_0666	1.99108	9.39556	1.39028	4.32112	4.05712	3.39464	4.84808	1.45344	5.21001	5.23207	1.31135	0	0.194476	1.19581	1.34887
MSMEG_0667	0.315534	6.97723	1.18105	3.06513	2.83346	2.28044	3.58683	1.30638	5.18831	4.90033	1.20258	0	-0.0595133	1.24056	1.09488
MSMEG_0668	3.27258	8.30397	0.93944	5.47173	5.32227	4.92565	6.02133	1.09568	5.24301	3.51936	0.495275	0	-0.181544	1.12098	0.972851
MSMEG_0669	2.70672	12.7757	2.64857	8.65949	9.62957	6.17973	10.9091	4.72938	5.20637	1.97488	-0.555973	0	1.55154	1.09703	2.70594
MSMEG_0670	2.30372	9.99061	1.73148	7.16275	7.5529	6.51138	8.33915	1.82776	5.22534	2.94741	-0.821927	0	0.657979	1.0735	1.81237
MSMEG_0671	4.06379	13.1081	2.05782	9.39958	10.0522	7.8873	10.8114	2.9241	5.23198	2.41124	-0.634387	0	0.946835	1.11099	2.10123
MSMEG_0672	5.007	14.7634	2.13499	10.6872	11.3293	9.75535	12.0984	2.34304	5.23594	2.97822	-0.912048	0	0.989426	1.14557	2.14382
MSMEG_0673	2.82494	8.46408	1.14468	5.92808	6.19955	5.20811	6.71648	1.50837	5.23772	3.04456	-0.661916	0	0.0445279	1.10016	1.19892
MSMEG_0674	4.99307	9.76514	0.953629	7.95614	8.09174	7.31539	8.72322	1.40783	5.25017	2.81022	-0.424769	0	-0.133112	1.08674	1.02128
MSMEG_0675	0.762864	6.91358	1.30946	3.04911	2.69796	2.1626	3.82669	1.66409	5.17123	3.53044	0.977507	0	0.0690081	1.24045	1.2234
MSMEG_0676	0.33239	6.26749	1.15771	3.24431	3.08237	2.51907	4.06337	1.5443	5.19193	2.79549	0.258343	0	-0.0832123	1.24093	1.07118
MSMEG_0678	1.85368	5.97526	0.682294	4.82208	4.91477	4.40182	5.2646	0.862784	5.24698	4.01991	-0.802342	0	-0.479168	1.16146	0.675227
MSMEG_0679	7.72329	11.2428	0.847377	9.62054	9.69289	8.89664	10.2793	1.38267	5.25362	2.09733	-0.0843439	0	-0.268736	1.11611	0.885659
MSMEG_0680	1.74773	8.35002	1.325	4.94879	5.1872	4.17242	5.70484	1.53242	5.21939	2.83552	-0.30792	0	0.17181	1.15319	1.32621
MSMEG_0681	4.76514	7.48214	0.618329	5.99274	5.90288	5.51451	6.40704	0.892532	5.25226	2.35816	0.42025	0	-0.479177	1.09751	0.675218
MSMEG_0682	4.94058	8.82506	0.739672	6.39441	6.23868	5.8481	6.87832	1.03022	5.25102	3.80604	0.90775	0	-0.34372	1.08339	0.810675
MSMEG_0683	4.53123	9.15953	0.991735	7.03986	7.04502	6.43077	7.79594	1.36517	5.24743	2.54756	-0.224966	0	-0.0828248	1.07456	1.07157
MSMEG_0684	0.776573	10.6349	2.58197	6.53039	6.74461	4.87294	8.79498	3.92204	5.16902	2.00901	-0.434761	0	1.50119	1.08079	2.65558
MSMEG_0685	0	11.8344	2.70294	7.22927	7.88324	5.88305	9.2973	3.41425	5.17282	2.6556	-0.767734	0.00520833	1.62946	1.07348	2.78386
MSMEG_0686	2.91118	12.849	2.33683	9.1599	9.85169	8.17684	10.9181	2.74128	5.22113	2.88946	-0.924004	0	1.23094	1.10589	2.38533
MSMEG_0687	4.22043	10.1936	1.06264	7.62179	7.60358	6.92114	8.52326	1.60213	5.24763	2.82894	-0.228403	0	-0.0162781	1.07892	1.13812
MSMEG_0688	5.15499	11.7706	1.03384	8.0332	8.05557	7.2626	8.70087	1.43826	5.24924	3.0293	0.154693	0	-0.0545422	1.08839	1.09985
MSMEG_0689	0.728871	7.58507	1.5379	3.43453	3.17792	2.30939	4.28593	1.97654	5.16098	3.11627	0.777639	0	0.29957	1.23833	1.45397
MSMEG_0690	7.45096	11.1678	0.812334	9.23826	9.1519	8.7365	9.91681	1.18031	5.25364	2.23864	-0.00592643	0	-0.295169	1.1075	0.859227
MSMEG_0691	2.23859	9.01187	1.08411	6.44583	6.54226	5.66892	7.31914	1.65022	5.24257	3.83366	-0.641238	0	0.00181085	1.0823	1.15621
MSMEG_0692	4.98245	9.20041	0.858643	7.7715	8.04297	7.31531	8.40505	1.08974	5.25115	3.35607	-1.01845	0	-0.223756	1.0824	0.930639
MSMEG_0693	2.93473	10.1973	1.36519	5.95941	5.81571	4.99936	6.62518	1.62582	5.23219	3.77785	0.76907	0	0.266319	1.09887	1.42071
MSMEG_0694	4.87128	12.567	1.41324	7.73613	7.58494	6.71306	8.76919	2.05612	5.24127	3.70028	0.659593	0	0.331686	1.08155	1.48608
MSMEG_0695	5.792	10.6703	0.744198	7.55669	7.53469	7.07958	7.94508	0.865502	5.2528	5.98206	1.03698	0	-0.333352	1.07755	0.821043
MSMEG_0696	0.731959	10.8	2.43273	5.86317	5.79984	4.66721	7.70247	3.03525	5.15893	2.48463	-0.288476	0	1.32988	1.10285	2.48428
MSMEG_0697	0.364212	12.7479	2.61681	7.48865	7.8983	6.21546	9.32429	3.10883	5.18577	2.95747	-0.631281	0	1.54055	1.07626	2.69495
MSMEG_0698	3.96383	7.62053	0.748042	5.66242	5.62304	5.22406	6.18735	0.963294	5.2488	2.85238	0.147515	0	-0.363566	1.11161	0.790829
MSMEG_0699	3.36673	10.6143	1.26112	6.54685	6.58808	5.79656	7.4502	1.65364	5.23865	3.09676	-0.0233282	0	0.180597	1.08053	1.33499
MSMEG_0700	4.95175	9.21449	0.816733	7.42594	7.56464	6.79191	7.99734	1.20542	5.2514	2.64201	-0.224402	0	-0.25851	1.07524	0.895885
MSMEG_0701	0.483665	8.1314	1.57162	3.62587	3.53622	2.28694	5.06857	2.78162	5.15985	2.33256	0.218483	0	0.340882	1.23074	1.49528
MSMEG_0702	6.40639	9.45326	0.450792	8.45802	8.47966	8.19248	8.77966	0.58718	5.25606	4.90789	-0.83364	0	-0.643423	1.09421	0.510972
MSMEG_0703	5.31642	9.60072	0.760995	7.41466	7.4397	6.83771	7.9827	1.14499	5.25225	2.94611	0.135797	0	-0.314085	1.07508	0.84031
MSMEG_0704	4.06949	8.75914	0.915699	6.26699	6.28538	5.76016	6.76466	1.00451	5.24679	3.36202	0.0763805	0	-0.171118	1.08682	0.983277
MSMEG_0705	0.884178	10.1808	1.6557	3.20972	2.78196	2.40227	3.4443	1.04203	5.15471	10.178	2.59897	0	0.41469	1.24101	1.56909
MSMEG_0706	0	10.5278	1.97995	2.66658	2.30023	1.61577	3.14777	1.532	5.02793	8.68047	2.22109	0.046875	0.741317	1.23863	1.89571
MSMEG_0707	0	9.49282	1.74064	1.35311	0.916776	0.594088	1.27625	0.68216	4.77117	14.3225	3.36402	0.03125	0.501488	1.23915	1.65588
MSMEG_0708	1.07231	6.81558	1.01956	4.3884	4.33468	3.79978	4.90932	1.10954	5.23019	3.29606	0.22084	0	-0.171915	1.19147	0.982481
MSMEG_0709	7.93739	14.4745	1.40064	11.0555	11.1198	10.2683	11.852	1.5837	5.24948	2.73453	0.0714197	0	0.243576	1.15707	1.39797
MSMEG_0710	5.4013	12.3445	1.56601	8.96342	9.08298	8.01984	9.98712	1.96728	5.24184	2.6937	-0.284244	0	0.463899	1.10212	1.61829
MSMEG_0711	6.04762	11.8003	1.20226	8.38604	8.35652	7.52812	9.00038	1.47226	5.24741	2.97764	0.476388	0	0.108936	1.09332	1.26333
MSMEG_0712	3.73417	11.3296	1.06453	6.43705	6.56988	5.79137	6.98882	1.19745	5.24424	7.08966	0.922318	0	-0.0179425	1.08247	1.13645
MSMEG_0713	4.38386	11.0922	1.21017	7.24669	7.20694	6.58424	7.86713	1.2829	5.24383	3.42355	0.522837	0	0.136636	1.07353	1.29103
MSMEG_0714	0.886951	5.93789	0.934635	2.27031	2.15479	1.7416	2.60896	0.867368	5.18326	7.76283	1.81458	0	-0.308691	1.24333	0.845705
MSMEG_0715	0	8.70706	1.37581	3.04188	2.94093	2.37762	3.54846	1.17083	5.16215	8.77291	1.74143	0.0104167	0.135407	1.2404	1.2898
MSMEG_0716	0.110408	7.376	1.3218	2.12566	1.97282	1.35133	2.41906	1.06773	5.10127	8.81526	2.23859	0	0.0777835	1.24401	1.23218
MSMEG_0717	4.22436	7.50439	0.675221	5.81243	5.83935	5.31458	6.27202	0.957436	5.25075	2.61347	0.0210487	0	-0.429768	1.10499	0.724627
MSMEG_0718	0.486399	7.6935	1.41722	3.01922	2.81218	1.98383	3.72227	1.73843	5.15524	4.88135	1.19469	0	0.176987	1.24024	1.33138
MSMEG_0719	2.86627	7.72397	1.07519	5.40446	5.3437	4.61985	6.11569	1.49584	5.23784	2.36606	0.261043	0	-0.0494553	1.12464	1.10494
MSMEG_0720	0	6.1169	1.0749	1.29369	1.03969	0.715447	1.44217	0.72672	5.00628	11.5801	2.75971	0.00520833	-0.163533	1.23843	0.990862
MSMEG_0721	1.87703	6.85022	1.12341	4.46489	4.34862	3.62311	5.38189	1.75877	5.22529	2.15399	0.0260595	0	-0.0627165	1.18613	1.09168
MSMEG_0722	0.43833	5.89949	0.952626	2.31484	2.1976	1.7149	2.71357	0.998668	5.17768	5.60031	1.19028	0	-0.290343	1.24297	0.864052
MSMEG_0723	0	7.37968	1.47949	2.8668	2.88718	1.82196	3.67623	1.85427	5.11164	3.36572	0.377974	0.0104167	0.240434	1.23906	1.39483
MSMEG_0725	0	6.68004	1.49636	2.13064	1.69519	0.91102	3.49409	2.58307	5.00728	2.54464	0.687644	0.03125	0.252357	1.244	1.40675
MSMEG_0727	0	6.98243	1.43745	3.07259	3.08176	2.1237	3.844	1.7203	5.13598	2.94355	0.209945	0.015625	0.196848	1.24061	1.35124
MSMEG_0728	3.12813	8.76117	1.15434	5.4405	5.25163	4.54101	6.30933	1.76831	5.23575	2.93732	0.67422	0	0.0316826	1.12266	1.18608
MSMEG_0729	2.06685	6.85027	0.999166	4.66559	4.59507	4.04938	5.44838	1.399	5.23382	2.82761	-0.173012	0	-0.172807	1.17197	0.981588
MSMEG_0730	3.0123	9.34778	0.959853	6.48941	6.47763	5.92919	6.9927	1.0635	5.2465	3.86325	0.0982614	0	-0.121625	1.08148	1.03277
MSMEG_0731	3.00184	7.59094	0.899873	5.20643	5.13324	4.68999	5.78255	1.09256	5.24245	3.10283	0.0550356	0	-0.236827	1.1367	0.917568
MSMEG_0732	5.92991	13.4471	1.22527	8.43265	8.13392	7.65947	9.02653	1.36706	5.24747	5.11165	1.25145	0	0.131378	1.09389	1.28577
MSMEG_0733	0.637261	6.19773	0.891524	3.4789	3.55206	3.09837	3.94734	0.848974	5.22315	4.32117	0.0305777	0	-0.345547	1.23707	0.808849
MSMEG_0734	1.5922	6.78604	0.919827	3.82947	3.82163	3.22048	4.35463	1.13416	5.22912	4.01785	0.562884	0	-0.301238	1.22107	0.853157
MSMEG_0735	1.2157	7.56652	1.02922	3.36282	3.21199	2.72591	3.77503	1.04912	5.2137	6.22566	1.28182	0	-0.210572	1.23979	0.943824
MSMEG_0736	6.6221	10.1583	0.497676	8.96848	9.02578	8.71303	9.30313	0.590108	5.25593	5.84539	-0.997178	0	-0.604532	1.10221	0.549863
MSMEG_0737	7.34357	10.5293	0.625642	9.11281	9.0307	8.71459	9.51161	0.797023	5.25515	3.10832	0.0201143	0	-0.479313	1.10495	0.675082
MSMEG_0738	3.32978	6.81275	0.653509	5.36063	5.43052	5.01404	5.84565	0.831618	5.24986	3.20895	-0.579029	0	-0.473638	1.12715	0.680757
MSMEG_0739	2.44687	6.02112	0.742096	4.53356	4.60698	4.01881	5.0925	1.07369	5.24374	2.61455	-0.349154	0	-0.439088	1.18118	0.715307
MSMEG_0740	5.53055	8.05428	0.493984	6.841	6.89653	6.51124	7.17692	0.665683	5.25488	2.84658	-0.211635	0	-0.582999	1.07698	0.571397
MSMEG_0741	3.51	6.52882	0.605547	5.25568	5.28408	4.95199	5.63232	0.680333	5.25072	3.49571	-0.46238	0	-0.528015	1.13356	0.626381
MSMEG_0742	2.83889	8.75345	1.23147	5.89215	5.90085	4.91689	6.96469	2.0478	5.23561	2.14366	0.125417	0	0.129832	1.10164	1.28423
MSMEG_0743	4.84942	9.35509	0.957454	6.94812	6.9365	6.2031	7.59631	1.39321	5.24806	2.41832	0.182521	0	-0.118321	1.07577	1.03607
MSMEG_0744	0.425031	8.92911	1.32758	3.32644	3.05748	2.58293	3.56335	0.980419	5.18614	6.3112	1.61098	0	0.0872876	1.2403	1.24168
MSMEG_0745	0	6.61375	1.16178	1.35817	0.998407	0.675264	1.5458	0.870534	4.95554	6.9213	1.92616	0.0364583	-0.0774253	1.23921	1.07697
MSMEG_0746	1.74114	10.6878	1.41925	4.16502	3.70956	3.32183	4.32299	1.00116	5.20734	6.93616	1.88668	0	0.214469	1.20478	1.36886
MSMEG_0747	0	8.12951	1.60804	2.35242	1.92131	1.42344	2.62223	1.1988	5.05521	5.26659	1.63952	0.0260417	0.365427	1.24261	1.51982
MSMEG_0748	0	6.34779	1.34709	1.95317	1.64491	1.06807	2.32556	1.25748	5.0566	5.38874	1.65528	0.00520833	0.103085	1.244	1.25748
MSMEG_0749	0	6.91984	1.41086	2.15195	1.88471	1.25871	2.40122	1.14252	5.06691	5.04811	1.52226	0.015625	0.166921	1.24394	1.32132
MSMEG_0750	3.72588	9.86343	0.816318	7.41568	7.41771	6.9198	7.9184	0.998603	5.25133	5.14292	-0.285627	0	-0.258777	1.07509	0.895619
MSMEG_0751	0	7.22256	1.71631	2.1292	1.61344	0.666765	3.4066	2.73984	4.92957	2.87063	0.80949	0.0260417	0.472302	1.244	1.6267
MSMEG_0752	4.068	9.32806	0.880794	6.40873	6.44987	5.9482	6.90979	0.961591	5.24805	3.58331	0.134251	0	-0.202279	1.08307	0.952116
MSMEG_0753	4.12564	8.35819	0.646851	6.76595	6.8333	6.49747	7.1179	0.620429	5.25281	4.9025	-0.701981	0	-0.430933	1.07778	0.723462
MSMEG_0754	4.6814	8.58786	0.707394	7.26121	7.34119	6.77453	7.7863	1.01177	5.25266	3.432	-0.532031	0	-0.366196	1.07359	0.788199
MSMEG_0755	2.79445	9.64622	1.34187	5.78455	5.91641	4.71092	6.63057	1.91965	5.23081	3.0488	0.363466	0	0.235684	1.10618	1.39008
MSMEG_0756	4.57769	8.13579	0.740492	6.43096	6.55422	5.98503	6.94108	0.956052	5.25078	2.73808	-0.292276	0	-0.342108	1.0826	0.812287
MSMEG_0757	0.957102	8.87361	1.73698	4.72686	4.64112	3.52754	5.78201	2.25448	5.18771	2.62071	0.218091	0	0.56917	1.16781	1.72357
MSMEG_0758	0.782158	6.75258	1.05018	3.09523	3.09311	2.41879	3.66369	1.2449	5.20018	3.99852	0.581693	0	-0.190553	1.24074	0.963843
MSMEG_0759	5.79273	10.014	1.0384	7.96342	7.89056	7.32817	8.59699	1.26881	5.24901	2.34167	0.0761508	0	-0.0485044	1.0869	1.10589
MSMEG_0760	2.86955	7.75739	0.867058	5.73778	5.89839	5.20515	6.31794	1.11279	5.24557	3.55446	-0.665071	0	-0.241161	1.10822	0.913234
MSMEG_0761	2.54733	8.7673	1.1584	5.12759	4.9308	4.35368	5.77842	1.42474	5.23258	3.53694	0.610231	0	0.01668	1.14172	1.17108
MSMEG_0762	4.91559	11.1694	1.21716	7.5224	7.25263	6.59041	8.4571	1.8667	5.24473	2.84661	0.570902	0	0.140277	1.07688	1.29467
MSMEG_0763	6.65281	12.1807	1.45297	9.31191	9.26912	8.05493	10.5077	2.45278	5.2453	1.90539	0.0185569	0	0.343904	1.10906	1.4983
MSMEG_0764	5.10895	9.58542	1.016	7.6113	7.62954	6.86403	8.42541	1.56138	5.24849	2.37378	-0.196371	0	-0.062692	1.07869	1.0917
MSMEG_0765	2.10581	6.09582	0.848047	4.37428	4.39321	3.86103	4.91469	1.05366	5.23809	2.81868	-0.26701	0	-0.344364	1.19241	0.810031
MSMEG_0766	6.58795	10.3373	0.648931	8.80683	8.81823	8.36342	9.22683	0.863417	5.25477	3.35134	-0.210637	0	-0.450446	1.09938	0.703949
MSMEG_0767	4.1467	7.13338	0.615232	5.76924	5.79638	5.39177	6.16662	0.774847	5.25176	2.7664	-0.242506	0	-0.491613	1.10684	0.662783
MSMEG_0768	5.94812	9.54415	0.732719	8.27182	8.41987	7.75886	8.8744	1.11554	5.25352	2.7209	-0.525917	0	-0.359307	1.09203	0.795088
MSMEG_0769	7.25897	10.3721	0.613119	9.08993	9.23938	8.65426	9.49131	0.837053	5.25519	2.96422	-0.647668	0	-0.491387	1.10451	0.663008
MSMEG_0770	4.74223	9.70333	1.06174	7.58769	7.56094	6.86337	8.27142	1.40806	5.24762	2.45104	-0.110295	0	-0.016453	1.07819	1.13794
MSMEG_0771	1.24314	5.86001	0.845228	3.21583	3.16175	2.64248	3.6498	1.00732	5.2235	4.01278	0.590841	0	-0.395776	1.241	0.75862
MSMEG_0772	0	7.37922	1.42734	1.61933	1.18363	0.793126	2.1259	1.33277	4.94008	8.60989	2.1511	0.0416667	0.185356	1.24199	1.33975
MSMEG_0773	1.38881	9.43186	1.75401	4.31823	3.98771	3.01391	5.55217	2.53825	5.17712	2.95968	0.647061	0	0.558022	1.19599	1.71242
MSMEG_0774	2.88917	11.4984	1.7689	5.77647	5.37002	4.34898	6.93207	2.58309	5.21368	4.02221	1.04458	0	0.66237	1.10653	1.81677
MSMEG_0775	6.29358	10.0603	0.658919	8.17337	8.18842	7.74035	8.59874	0.858385	5.25425	3.27552	-0.068101	0	-0.431929	1.09085	0.722466
MSMEG_0776	2.56074	8.85652	1.16743	5.82641	5.92937	5.18054	6.41344	1.2329	5.2369	3.72102	-0.0594671	0	0.0630347	1.1044	1.21743
MSMEG_0777	6.23991	9.86828	0.686505	8.38334	8.43203	8.11604	8.82217	0.706128	5.25409	3.32651	-0.588617	0	-0.406782	1.09329	0.747613
MSMEG_0778	2.44658	10.2376	2.11526	6.3483	5.56289	4.63291	8.55278	3.91987	5.20163	1.66123	0.185748	0	1.03075	1.08451	2.18515
MSMEG_0779	0.836879	10.5818	1.6683	4.51663	4.318	3.46498	5.16794	1.70296	5.19257	5.01874	1.06207	0	0.48591	1.18239	1.64031
MSMEG_0780	0.393949	8.23741	1.57733	2.4937	2.23273	1.43401	2.95162	1.51761	5.07938	5.31752	1.45115	0	0.336547	1.24078	1.49094
MSMEG_0781	1.88419	10.3681	1.66067	6.15427	6.34889	4.85738	7.24694	2.38955	5.21958	2.57346	-0.120407	0	0.569792	1.09088	1.72419
MSMEG_0782	4.15182	10.3038	0.884206	7.52798	7.57927	7.04717	7.99323	0.946061	5.25051	4.44053	-0.177191	0	-0.192779	1.07699	0.961616
MSMEG_0783	4.53208	8.06464	0.72406	6.69054	6.85858	6.20605	7.30855	1.1025	5.25153	2.45967	-0.49974	0	-0.354561	1.07862	0.799834
MSMEG_0784	4.24346	8.18076	0.884584	6.71975	6.66501	6.04073	7.4679	1.42717	5.24871	2.17608	-0.277402	0	-0.193705	1.07829	0.960691
MSMEG_0785	0	7.40026	1.33197	2.42313	2.14814	1.56543	3.17454	1.60911	5.11227	5.66239	1.24908	0.015625	0.0901755	1.24179	1.24457
MSMEG_0786	4.99642	10.1246	0.904095	6.93496	6.93899	6.21662	7.64419	1.42757	5.24903	2.76881	0.142913	0	-0.171837	1.07593	0.982558
MSMEG_0787	4.72895	9.85513	1.04146	6.80128	6.89254	5.89581	7.44426	1.54845	5.2458	2.70681	0.151175	0	-0.0359452	1.07741	1.11845
MSMEG_0788	4.12517	9.16039	0.911813	6.88411	7.09006	6.2801	7.4226	1.1425	5.24856	3.01991	-0.338332	0	-0.164701	1.07651	0.989694
MSMEG_0789	3.12124	7.75191	0.901457	5.87364	5.86112	5.41165	6.49176	1.08012	5.24546	2.91214	-0.281695	0	-0.200955	1.10241	0.95344
MSMEG_0790	3.23153	7.57469	0.798499	5.57476	5.67003	5.0441	6.1264	1.0823	5.24702	2.86575	-0.337912	0	-0.317257	1.11576	0.837138
MSMEG_0791	4.18412	9.30335	1.12974	7.11422	7.31109	6.61739	7.86654	1.24915	5.24439	2.75066	-0.598624	0	0.0559953	1.07375	1.21039
MSMEG_0792	1.76683	8.23447	1.31766	5.43469	5.67715	4.55899	6.30645	1.74746	5.22597	2.84013	-0.512657	0	0.194686	1.12297	1.34908
MSMEG_0793	5.46358	11.1544	1.19725	8.65189	8.93328	8.08899	9.47556	1.38656	5.24756	3.04688	-0.698942	0	0.100328	1.09692	1.25472
MSMEG_0794	3.75497	8.87027	1.05957	6.46297	6.63678	5.76747	7.26977	1.5023	5.24366	2.59799	-0.400801	0	-0.0223973	1.08196	1.132
MSMEG_0795	3.59653	7.24219	0.707605	5.58714	5.67291	5.09071	6.11345	1.02274	5.24937	2.7578	-0.250833	0	-0.407549	1.11515	0.746846
MSMEG_0796	4.56173	8.50281	0.740051	6.29564	6.37517	5.7893	6.85265	1.06335	5.25048	2.76959	-0.351639	0	-0.345898	1.08595	0.808498
MSMEG_0797	4.86359	8.81737	0.949202	6.91873	6.89079	6.28711	7.55724	1.27013	5.2481	2.25377	0.0700255	0	-0.12692	1.07612	1.02747
MSMEG_0798	1.4123	5.15728	0.914422	3.34261	3.29035	2.60157	4.13703	1.53546	5.21993	1.9286	0.167002	0	-0.325668	1.24009	0.828727
MSMEG_0799	1.43313	5.73042	0.91537	3.50053	3.48495	2.79189	4.18812	1.39624	5.22259	2.33665	0.0324429	0	-0.320979	1.23635	0.833416
MSMEG_0800	0.763076	6.72215	1.24159	3.69686	3.79002	2.7946	4.64193	1.84733	5.19792	2.54616	-0.0421819	0	0.0143098	1.22728	1.16871
MSMEG_0805	1.51122	8.3707	1.03417	4.11974	4.17964	3.62647	4.58611	0.959641	5.22726	7.28341	1.12587	0	-0.172986	1.20715	0.98141
MSMEG_0806	5.92887	9.23659	0.595599	7.64404	7.72501	7.29593	7.92983	0.633897	5.25445	3.42017	-0.173576	0	-0.483818	1.07942	0.670577
MSMEG_0807	4.54758	8.26679	0.721554	6.74631	6.78257	6.20478	7.29214	1.08737	5.25173	2.70384	-0.197366	0	-0.356442	1.078	0.797953
MSMEG_0808	0	6.59215	1.30614	2.67368	2.56654	1.68692	3.54514	1.85822	5.13565	3.17337	0.552779	0.00520833	0.0675324	1.2386	1.22193
MSMEG_0810	3.5386	8.89593	1.05691	6.0551	6.23329	5.27876	6.76686	1.48811	5.24201	3.01866	-0.104081	0	-0.0380465	1.09496	1.11635
MSMEG_0811	0	5.98059	0.963788	1.10526	0.902811	0.487973	1.37755	0.889582	4.97176	13.4925	2.8473	0.00520833	-0.272301	1.23609	0.882094
MSMEG_0812	3.82113	9.93062	1.08516	5.94423	5.77236	5.26108	6.52609	1.26501	5.24156	4.7428	0.988491	0	-0.0143321	1.09949	1.14006
MSMEG_0813	0.967352	4.74978	0.794276	2.58022	2.51697	2.00315	2.9836	0.980449	5.21132	2.85762	0.587283	0	-0.445102	1.23938	0.709293
MSMEG_0814	2.30749	8.82415	1.46827	5.92331	6.03029	5.17521	7.12615	1.95095	5.22492	2.44816	-0.420068	0	0.367913	1.10035	1.52231
MSMEG_0815	3.15596	8.55894	1.11236	5.93853	5.89336	5.16763	6.79922	1.63159	5.2396	2.41084	-0.160744	0	0.0126305	1.09973	1.16703
MSMEG_0816	1.52775	8.10694	1.20474	5.39642	5.37145	4.79967	6.05468	1.25501	5.23102	3.95946	-0.327346	0	0.0796404	1.1251	1.23404
MSMEG_0817	0.130228	5.00552	1.08818	2.20548	2.13715	1.36351	2.73211	1.3686	5.13565	2.91829	0.619441	0	-0.155536	1.24372	0.99886
MSMEG_0818	3.17859	9.77753	0.974977	5.54791	5.32555	5.00845	5.90424	0.895788	5.24301	6.81245	1.44461	0	-0.142101	1.11708	1.01229
MSMEG_0819	3.40091	8.41221	0.886577	5.54484	5.4888	4.96961	5.9117	0.942095	5.24521	4.63916	0.955512	0	-0.230655	1.11723	0.923741
MSMEG_0820	0	6.29713	0.979326	2.50357	2.44724	1.94665	2.91085	0.964199	5.18156	6.86826	1.18707	0.0104167	-0.261293	1.24062	0.893102
MSMEG_0821	3.32732	9.22599	1.01892	5.53345	5.53673	4.87984	5.89176	1.01192	5.24133	5.29977	1.07559	0	-0.0988785	1.1178	1.05552
MSMEG_0822	1.65921	6.86572	0.91871	3.57491	3.42535	3.03799	3.99222	0.954235	5.22665	5.25411	1.21915	0	-0.314573	1.23328	0.839822
MSMEG_0823	2.88831	6.95655	0.922451	4.97837	4.81245	4.33474	5.6327	1.29796	5.2404	2.31053	0.193069	0	-0.228827	1.15128	0.925568
MSMEG_0824	2.48503	9.72341	1.73991	6.66896	6.98752	5.55865	7.9887	2.43004	5.22077	2.36014	-0.570878	0	0.661034	1.07888	1.81543
MSMEG_0825	2.16612	9.55788	1.80798	6.30304	6.75167	5.16021	7.7453	2.58509	5.2126	2.18047	-0.595974	0	0.722245	1.08573	1.87664
MSMEG_0826	2.87802	12.2848	2.16869	8.00149	8.49587	6.57196	9.78574	3.21377	5.21781	2.35894	-0.537159	0	1.08097	1.08773	2.23536
MSMEG_0827	1.27517	8.214	1.09309	4.08337	3.97688	3.40066	4.63309	1.23244	5.22334	5.91512	1.07513	0	-0.115914	1.209	1.03848
MSMEG_0828	1.87147	6.89048	1.01625	4.38141	4.30489	3.63601	5.0027	1.36668	5.23071	2.79705	0.314714	0	-0.175686	1.19194	0.978709
MSMEG_0829	5.65603	8.97768	0.794231	7.47354	7.44053	6.88735	8.09701	1.20966	5.25184	2.18314	-0.085873	0	-0.281769	1.076	0.872626
MSMEG_0830	2.7241	7.42408	0.992307	5.35983	5.55744	4.67482	5.96713	1.29232	5.23957	2.97162	-0.505031	0	-0.134887	1.12719	1.01951
MSMEG_0831	0.192524	6.53707	1.10806	1.8467	1.66938	1.0954	2.23425	1.13886	5.10326	8.47193	1.93724	0	-0.135549	1.24361	1.01885
MSMEG_0832	4.71164	9.16916	0.89883	7.44499	7.42173	6.79812	8.08359	1.28547	5.25013	2.69158	-0.207064	0	-0.176704	1.07553	0.977692
MSMEG_0833	4.02728	10.732	1.35127	7.74158	7.80371	6.77893	8.75153	1.97259	5.24192	2.65513	-0.218766	0	0.26959	1.08168	1.42399
MSMEG_0834	4.64395	10.0212	0.951578	7.42108	7.49842	6.83778	7.93304	1.09526	5.24915	3.31292	-0.242521	0	-0.123594	1.07517	1.0308
MSMEG_0835	6.19745	10.2095	0.91441	8.65831	8.87826	8.34448	9.31106	0.966581	5.2517	3.60257	-1.0521	0	-0.182605	1.09702	0.97179
MSMEG_0836	5.59235	9.30788	0.927455	7.60446	7.62244	6.88828	8.39321	1.50493	5.24997	2.09315	-0.276527	0	-0.151091	1.07855	1.0033
MSMEG_0837	4.87672	9.70331	0.752859	7.23269	7.35767	6.80079	7.71742	0.916632	5.252	3.57272	-0.368123	0	-0.320626	1.07349	0.833769
MSMEG_0838	3.41942	7.25283	0.763844	4.96462	4.90665	4.38019	5.42449	1.0443	5.24586	2.80226	0.428004	0	-0.38832	1.15216	0.766075
MSMEG_0839	2.83424	7.38251	1.00318	5.12597	5.0601	4.3896	5.73437	1.34477	5.2383	2.40354	0.126302	0	-0.138643	1.14183	1.01575
MSMEG_0840	4.4385	9.13805	1.10456	6.90214	7.05866	6.20352	7.49287	1.28936	5.24451	2.42026	-0.154881	0	0.0282513	1.07631	1.18265
MSMEG_0841	4.52275	11.2313	1.25528	8.32785	8.37359	7.37335	9.04179	1.66844	5.24608	2.792	0.0178298	0	0.162643	1.09264	1.31704
MSMEG_0842	2.05908	7.36092	1.20199	4.90158	4.98505	3.92161	5.68063	1.75901	5.22679	2.35718	-0.00631404	0	0.0457415	1.15625	1.20014
MSMEG_0843	0.461143	6.60491	0.77637	5.2216	5.34787	4.94062	5.67504	0.734419	5.2446	10.0502	-1.76028	0	-0.359364	1.13573	0.795031
MSMEG_0844	2.34877	6.57153	0.72668	5.13202	5.1969	4.72921	5.60338	0.874162	5.24703	3.94636	-0.706272	0	-0.41476	1.14144	0.739635
MSMEG_0845	4.05284	8.85946	0.934543	7.10129	7.23533	6.50022	7.684	1.18378	5.24861	3.21188	-0.482916	0	-0.139309	1.07385	1.01509
MSMEG_0846	4.51432	8.76856	0.830856	7.35995	7.50412	7.00697	7.89687	0.889905	5.25089	3.45787	-0.891209	0	-0.243529	1.07438	0.910867
MSMEG_0847	2.12989	6.62933	0.952096	4.75982	4.79246	4.09147	5.48557	1.39411	5.23676	2.57039	-0.320177	0	-0.213502	1.1656	0.940893
MSMEG_0848	5.71947	10.0808	0.665355	8.73341	8.79793	8.33652	9.26329	0.926768	5.25453	4.4325	-0.862241	0	-0.432825	1.09818	0.72157
MSMEG_0849	1.21766	6.06191	0.88748	3.71029	3.76385	3.12779	4.28665	1.15886	5.2282	2.97859	0.0249407	0	-0.339161	1.22664	0.815234
MSMEG_0850	0.380002	6.5729	1.15733	2.84485	2.6947	2.23318	3.23556	1.00238	5.17818	4.42419	0.991989	0	-0.0815861	1.23892	1.07281
MSMEG_0851	0.326986	6.62639	1.23881	2.58499	2.13905	1.63432	3.53884	1.90453	5.14846	3.48526	0.880778	0	-0.000511705	1.23932	1.15388
MSMEG_0852	0.360784	4.82598	0.998303	2.26296	2.03415	1.56201	2.75316	1.19115	5.16435	3.04659	0.821503	0	-0.245075	1.24338	0.909321
MSMEG_0853	0	2.64295	0.519773	0.620541	0.449334	0.292725	0.808799	0.516074	4.95235	5.78917	1.64454	0.03125	-0.711045	1.23082	0.44335
MSMEG_0854	2.57995	7.54795	1.01325	4.48123	4.41717	3.75296	4.98454	1.23158	5.23271	3.4561	0.672718	0	-0.171694	1.18494	0.982701
MSMEG_0855	1.01455	7.02533	1.15091	3.68995	3.6572	2.83428	4.36291	1.52863	5.20866	3.06823	0.375382	0	-0.0766988	1.22761	1.0777
MSMEG_0856	2.26359	6.57467	0.968996	4.05328	3.82696	3.36576	4.61874	1.25298	5.23004	2.81097	0.719755	0	-0.241501	1.2105	0.912894
MSMEG_0857	0.0980758	5.1089	1.148	2.86263	2.98529	2.0969	3.67103	1.57413	5.16453	2.43642	-0.362489	0	-0.0910298	1.23903	1.06337
MSMEG_0858	6.13304	9.15819	0.616666	8.1047	8.14122	7.71222	8.60714	0.894921	5.25458	2.67863	-0.36452	0	-0.473078	1.08974	0.681317
MSMEG_0859	4.60165	8.05896	0.732059	6.53149	6.50843	6.08729	7.05265	0.965358	5.25119	2.56517	-0.0891294	0	-0.348709	1.08077	0.805687
MSMEG_0860	4.92987	7.88614	0.602904	6.69454	6.76321	6.23765	7.14969	0.912038	5.25341	2.41529	-0.331268	0	-0.475671	1.07857	0.678724
MSMEG_0861	4.24852	8.09865	0.750707	6.77116	6.9165	6.24878	7.32915	1.08037	5.25116	3.50776	-0.746082	0	-0.327021	1.07773	0.827374
MSMEG_0862	5.74486	8.75178	0.656258	7.27558	7.35764	6.80608	7.75574	0.949663	5.25341	2.3511	-0.20815	0	-0.417407	1.07366	0.736988
MSMEG_0863	4.47526	8.49347	0.728869	6.68022	6.73248	6.30885	7.24569	0.936834	5.25143	2.88723	-0.509882	0	-0.349872	1.07874	0.804523
MSMEG_0864	2.41618	6.55186	0.823233	4.31401	4.2428	3.73351	4.85549	1.12198	5.23938	2.73401	0.254205	0	-0.373015	1.19625	0.78138
MSMEG_0865	2.27531	8.06747	0.860073	5.18875	5.14866	4.7116	5.6711	0.959505	5.24374	4.7143	0.274735	0	-0.277753	1.13783	0.876642
MSMEG_0866	4.7716	9.95629	1.09549	7.87127	7.8318	7.15719	8.81277	1.65559	5.24762	2.51794	-0.349988	0	0.0107051	1.08479	1.1651
MSMEG_0867	4.02678	9.9608	0.845601	6.70822	6.76764	6.21577	7.13767	0.921905	5.24958	4.84742	0.270619	0	-0.232818	1.07842	0.921577
MSMEG_0868	0.0582951	8.54368	1.37945	1.6224	1.33626	0.929742	1.87512	0.945383	4.99427	14.0741	3.01928	0	0.137437	1.24202	1.29183
MSMEG_0870	1.77853	9.06173	0.995154	4.54079	4.53406	4.12623	4.87285	0.746617	5.23559	11.8466	2.06461	0	-0.185516	1.18067	0.968879
MSMEG_0871	0	6.2994	0.922878	1.88036	1.80481	1.40701	2.1858	0.778796	5.15223	12.0109	2.32301	0.00520833	-0.320883	1.24376	0.833512
MSMEG_0872	0.556829	6.38579	0.904902	2.94553	2.91305	2.41396	3.37753	0.963564	5.21186	6.22715	1.04513	0	-0.334753	1.23965	0.819643
MSMEG_0874	1.4255	6.29021	0.885375	3.85951	3.88824	3.26391	4.30336	1.03946	5.2312	3.59921	0.345576	0	-0.334299	1.21967	0.820096
MSMEG_0875	2.30193	7.16493	0.905929	4.44186	4.4213	3.80786	5.03625	1.22838	5.237	3.41818	0.45435	0	-0.281859	1.18779	0.872536
MSMEG_0876	3.92647	8.68203	1.02489	6.18808	6.14862	5.59057	6.88913	1.29856	5.24368	2.45051	-0.0236935	0	-0.0646561	1.08955	1.08974
MSMEG_0877	2.77061	6.95216	0.840967	5.20876	5.12901	4.54793	5.82956	1.28164	5.24442	2.32436	0.0471593	0	-0.295584	1.13655	0.858811
MSMEG_0878	2.6263	6.89484	0.809066	4.4275	4.36183	3.88203	4.93034	1.0483	5.24106	3.43337	0.461392	0	-0.379735	1.1888	0.774661
MSMEG_0880	6.77096	15.7562	1.78312	12.9914	13.6575	12.1738	14.2291	2.05523	5.24739	4.2418	-1.33841	0	0.562545	1.22058	1.71694
MSMEG_0881	0.419105	7.42336	1.28711	4.03976	3.92953	3.29969	4.68872	1.38903	5.2048	3.55734	0.292024	0	0.0759497	1.21116	1.23034
MSMEG_0882	4.60396	9.20734	0.932468	6.61289	6.71071	6.0627	7.20622	1.14352	5.24751	2.71177	-0.0241618	0	-0.147114	1.07958	1.00728
MSMEG_0883	3.35045	8.52084	1.09082	5.6973	5.63638	4.89822	6.44444	1.54623	5.23933	2.30038	0.268622	0	-0.0191969	1.11002	1.1352
MSMEG_0884	1.88815	6.42413	0.930866	3.98724	3.93148	3.33185	4.58773	1.25588	5.23027	2.60926	0.242739	0	-0.282831	1.2137	0.871565
MSMEG_0885	1.08666	5.76356	0.894305	3.89033	3.81103	3.20593	4.5196	1.31367	5.23073	2.69286	0.122476	0	-0.32394	1.21825	0.830455
MSMEG_0886	5.30682	9.79481	0.770314	6.8409	6.76126	6.39093	7.16667	0.775737	5.25141	5.88191	1.21665	0	-0.30667	1.07698	0.847726
MSMEG_0887	3.7879	8.48846	0.971524	5.84777	5.82696	5.25599	6.51227	1.25628	5.24367	2.82894	0.101049	0	-0.131971	1.10349	1.02242
MSMEG_0888	1.71889	6.4539	0.943614	4.06913	4.05231	3.38862	4.69909	1.31046	5.2305	2.41459	0.16767	0	-0.266098	1.20971	0.888297
MSMEG_0889	3.50976	10.2391	1.24776	6.44299	6.37351	5.49942	7.25891	1.7595	5.2389	3.0522	0.332749	0	0.165403	1.08235	1.3198
MSMEG_0890	2.60809	7.45374	0.79277	4.22039	4.18325	3.67147	4.59431	0.922837	5.24062	4.94937	0.984059	0	-0.408977	1.20175	0.745418
MSMEG_0891	1.35931	6.80473	0.986501	3.79632	3.84155	3.17398	4.22356	1.04958	5.22431	4.04773	0.604544	0	-0.236101	1.2226	0.918294
MSMEG_0892	2.18269	6.13444	0.794973	4.66508	4.87946	4.17788	5.15241	0.97454	5.24216	3.22394	-0.737229	0	-0.377035	1.17201	0.777361
MSMEG_0893	0.145203	6.00824	1.00234	2.06751	1.98833	1.35614	2.57181	1.21568	5.14726	6.16674	1.29691	0	-0.241763	1.2441	0.912632
MSMEG_0894	1.98354	8.81438	1.69552	5.24717	4.97225	3.98402	6.5525	2.56847	5.2047	2.19608	0.214327	0	0.561418	1.1341	1.71581
MSMEG_0895	4.53917	7.94211	0.592927	6.33986	6.38423	5.96696	6.7161	0.749138	5.25307	3.33203	-0.38543	0	-0.491797	1.08472	0.662598
MSMEG_0896	4.05139	7.1783	0.744209	5.71345	5.73696	5.1619	6.31338	1.15148	5.24896	2.14553	-0.118902	0	-0.365088	1.1093	0.789307
MSMEG_0897	4.19894	7.97877	0.710649	6.18632	6.08502	5.76427	6.66034	0.896068	5.25099	3.19283	0.396697	0	-0.378966	1.08961	0.775429
MSMEG_0898	0.920276	6.41115	0.90739	4.14335	4.1188	3.52827	4.75359	1.22532	5.23257	3.30754	-0.151333	0	-0.298534	1.20592	0.855861
MSMEG_0899	5.88138	8.54686	0.606613	7.50117	7.57434	7.09679	7.9718	0.875014	5.25419	2.5876	-0.432582	0	-0.469872	1.07649	0.684523
MSMEG_0900	3.12019	11.858	1.29681	5.82091	5.64703	5.01346	6.50625	1.49278	5.23374	5.49725	0.975773	0	0.192186	1.10463	1.34658
MSMEG_0901	2.87198	11.0062	1.30672	5.05298	4.85413	4.17858	5.50395	1.32537	5.22706	6.6242	1.58121	0	0.160233	1.14649	1.31463
MSMEG_0902	1.86204	7.71694	1.34304	5.0602	4.91809	4.15284	6.22251	2.06967	5.22101	2.32273	-0.103612	0	0.197019	1.14603	1.35141
MSMEG_0903	7.15033	10.7552	0.755244	9.44877	9.52885	9.01525	10.0274	1.01211	5.25425	3.19298	-0.66111	0	-0.356849	1.11209	0.797547
MSMEG_0904	2.60503	6.99945	0.97127	4.9186	4.98401	4.18376	5.58157	1.39782	5.2375	2.38031	-0.207582	0	-0.183874	1.15514	0.970522
MSMEG_0905	3.06085	7.70276	0.851573	5.31652	5.12853	4.68559	6.01259	1.327	5.24489	2.60205	0.431091	0	-0.278195	1.12977	0.8762
MSMEG_0906	3.40189	7.91752	0.918977	6.30633	6.37317	5.79079	6.91198	1.12119	5.2466	2.80815	-0.420409	0	-0.166663	1.08564	0.987732
MSMEG_0907	0	5.32375	0.961873	1.32379	1.17848	0.731288	1.6195	0.888213	5.01366	7.92549	1.79916	0.0520833	-0.276924	1.2388	0.877472
MSMEG_0908	0.457426	6.80121	1.10503	2.84947	2.85694	2.19019	3.33291	1.14272	5.1833	5.55827	0.919413	0	-0.133919	1.23895	1.02048
MSMEG_0909	6.00436	8.84299	0.602717	7.50707	7.52515	7.11222	7.9224	0.810177	5.25428	2.52058	-0.057519	0	-0.473876	1.07659	0.680519
MSMEG_0911	5.55639	14.4685	1.70085	8.95237	8.63124	7.79589	9.7782	1.98231	5.24026	3.74161	0.926052	0	0.598935	1.10191	1.75333
MSMEG_0912	3.95083	9.32167	0.92905	6.80967	6.88736	6.29037	7.38985	1.09948	5.24798	3.43239	-0.343841	0	-0.148268	1.07732	1.00613
MSMEG_0913	6.25863	11.4773	1.11334	8.89659	8.91008	8.0453	9.8452	1.7999	5.24956	2.41643	-0.284791	0	0.0124255	1.10092	1.16682
MSMEG_0914	1.74268	6.51118	0.939892	4.13142	4.1721	3.48396	4.67722	1.19327	5.23121	3.02816	0.0900348	0	-0.266655	1.20655	0.887741
MSMEG_0915	6.78263	11.9557	0.805803	9.38085	9.49008	9.02354	9.80137	0.777824	5.25374	4.54233	-0.566116	0	-0.304767	1.11057	0.849628
MSMEG_0916	4.79332	15.2219	1.28909	7.07227	6.99322	6.40384	7.52116	1.11732	5.24334	24.525	3.72904	0	0.214951	1.07414	1.36935
MSMEG_0917	5.91546	9.37183	0.626896	7.40616	7.3639	6.99682	7.86729	0.870465	5.25392	2.64598	-0.0402455	0	-0.448065	1.07496	0.70633
MSMEG_0918	4.26237	9.97342	1.18977	6.19121	5.90587	5.34775	6.68143	1.33367	5.24001	3.6605	1.04351	0	0.100345	1.08943	1.25474
MSMEG_0919	4.30602	11.5679	1.32662	7.40391	7.25836	6.48742	8.26361	1.77619	5.24183	3.29919	0.579237	0	0.251685	1.07493	1.40608
MSMEG_0920	3.58119	7.71	0.793191	5.98226	6.10866	5.51165	6.5473	1.03565	5.24836	3.21167	-0.766691	0	-0.304743	1.09793	0.849652
MSMEG_0921	4.22915	9.02315	0.852083	6.71977	6.87334	6.43859	7.25294	0.814341	5.24905	4.11264	-1.01623	0	-0.226206	1.07829	0.928189
MSMEG_0922	2.7767	6.95705	0.821588	4.91764	4.88687	4.40121	5.58862	1.18741	5.24331	2.46068	-0.161066	0	-0.333619	1.15521	0.820777
MSMEG_0923	7.78663	10.8235	0.720026	9.79577	9.96587	9.37796	10.3679	0.989928	5.25474	3.12419	-0.925653	0	-0.400424	1.12045	0.753971
MSMEG_0924	6.1369	9.31441	0.798877	7.65398	7.58275	6.98884	8.31033	1.32149	5.2521	2.04716	0.222036	0	-0.280764	1.07964	0.873631
MSMEG_0925	3.86051	9.25413	0.991292	6.5861	6.68159	5.90829	7.20247	1.29418	5.24594	3.10597	-0.251661	0	-0.0886554	1.07995	1.06574
MSMEG_0926	3.16412	7.14094	0.829052	5.3582	5.35053	4.91811	5.86538	0.947263	5.24537	2.82685	-0.117632	0	-0.298237	1.12729	0.856158
MSMEG_0927	2.63544	6.78924	0.853095	5.25031	5.3788	4.71304	5.92137	1.20832	5.24344	3.56775	-0.932958	0	-0.280808	1.1339	0.873587
MSMEG_0928	3.58345	7.68283	0.910759	6.06326	6.19323	5.576	6.79423	1.21824	5.24567	3.0711	-0.795158	0	-0.183868	1.09463	0.970528
MSMEG_0929	6.54139	10.5039	0.617874	9.21536	9.25119	8.87737	9.60935	0.73198	5.2552	5.90328	-1.02244	0	-0.489153	1.10703	0.665242
MSMEG_0930	3.72809	7.02719	0.651611	5.52647	5.50023	5.11797	5.98655	0.86858	5.25046	3.08925	-0.234736	0	-0.466543	1.11815	0.687852
MSMEG_0932	4.26214	11.0167	1.55844	8.49693	8.60592	7.32747	9.72614	2.39867	5.24008	2.48503	-0.400829	0	0.463722	1.09472	1.61812
MSMEG_0933	6.03774	10.6683	0.825219	8.65147	8.64586	8.13697	9.06393	0.926963	5.25294	3.37124	-0.018237	0	-0.271694	1.09691	0.882702
MSMEG_0934	4.61296	10.6412	1.13201	7.45437	7.23764	6.7141	8.25156	1.53746	5.24619	2.99093	0.498896	0	0.0563256	1.07568	1.21072
MSMEG_0935	6.91921	10.2776	0.730433	8.72506	8.82373	8.26708	9.18909	0.922013	5.25397	2.57101	-0.329825	0	-0.367614	1.09805	0.786781
MSMEG_0936	4.73842	9.57503	0.67196	6.88167	6.97495	6.51852	7.22062	0.702096	5.25275	5.03159	0.217551	0	-0.40458	1.07654	0.749815
MSMEG_0937	3.35624	7.24884	0.729699	5.6688	5.64084	5.2613	6.07603	0.814725	5.24905	3.64115	-0.315831	0	-0.381616	1.11131	0.77278
MSMEG_0938	5.64928	9.64614	0.625959	8.08025	7.99545	7.71268	8.54732	0.834638	5.25448	3.92359	-0.204738	0	-0.463342	1.0893	0.691054
MSMEG_0939	8.42166	11.3288	0.663634	10.2691	10.4177	10.0409	10.7637	0.722724	5.25537	3.5	-1.03231	0	-0.469587	1.13322	0.684808
MSMEG_0940	7.18665	10.5322	0.636269	9.24563	9.37173	8.87758	9.65337	0.775791	5.2551	3.258	-0.68755	0	-0.471387	1.10766	0.683008
MSMEG_0941	4.8092	9.08267	0.906872	7.45441	7.63949	6.81262	8.10788	1.29526	5.24993	2.68887	-0.513311	0	-0.168811	1.07568	0.985584
MSMEG_0942	2.88398	6.27993	0.844207	4.95182	5.14195	4.28109	5.63188	1.35079	5.24235	2.33651	-0.59998	0	-0.308784	1.15299	0.845611
MSMEG_0943	3.95686	8.68582	0.871778	7.2658	7.53775	6.98709	7.78247	0.795376	5.24985	4.7403	-1.33586	0	-0.201834	1.07361	0.952561
MSMEG_0944	5.05948	9.83872	1.08646	8.19038	8.42493	7.41215	9.07153	1.65938	5.24838	2.75338	-0.716264	0	-0.00462212	1.09109	1.14977
MSMEG_0946	8.04616	12.6413	0.854699	11.0155	11.2128	10.3556	11.7442	1.38858	5.25444	2.95096	-0.681063	0	-0.301099	1.1558	0.853297
MSMEG_0947	6.31987	9.10146	0.628043	7.95151	8.07921	7.60212	8.39621	0.794082	5.25433	2.64123	-0.655763	0	-0.458596	1.08664	0.6958
MSMEG_0948	4.10297	9.16758	0.941834	7.29991	7.3976	6.58128	8.0331	1.45182	5.24895	2.98644	-0.523779	0	-0.13199	1.07382	1.0224
MSMEG_0949	4.11966	7.44058	0.610486	6.21963	6.33233	5.79705	6.67219	0.875147	5.25258	3.21147	-0.611332	0	-0.477908	1.08839	0.676487
MSMEG_0952	7.05501	10.7954	0.590566	9.32755	9.45068	9.12074	9.66423	0.543493	5.25545	5.48766	-1.11348	0	-0.518836	1.1094	0.635559
MSMEG_0953	5.39265	9.68362	0.922314	7.78661	7.85791	7.09326	8.47679	1.38353	5.25039	2.47388	-0.287385	0	-0.160447	1.08276	0.993948
MSMEG_0954	6.03487	10.9117	0.869219	8.85545	8.92299	8.40585	9.56499	1.15914	5.25254	3.70733	-0.811314	0	-0.230982	1.1002	0.923414
MSMEG_0956	3.89603	9.58032	1.12544	7.76452	7.97076	7.16371	8.56269	1.39899	5.24613	4.81831	-1.36299	0	0.0432133	1.08223	1.19761
MSMEG_0958	1.41744	6.67144	0.866042	4.91403	4.98442	4.49026	5.42637	0.936108	5.24094	4.21127	-0.702155	0	-0.289399	1.15544	0.864996
MSMEG_0959	5.28916	9.06926	0.846784	7.42285	7.38741	6.76496	8.12269	1.35773	5.25094	2.3632	-0.189453	0	-0.228414	1.0752	0.925981
MSMEG_0960	0.563523	6.43158	1.08334	4.45096	4.63436	3.73882	5.2411	1.50228	5.2247	3.25449	-0.745077	0	-0.103801	1.18714	1.05059
MSMEG_0961	2.97969	8.85637	1.10985	5.94819	6.06733	5.31041	6.72239	1.41198	5.23953	2.97746	-0.284441	0	0.010516	1.09933	1.16491
MSMEG_0962	3.59624	7.8996	0.879356	6.00853	6.1118	5.5963	6.53939	0.943093	5.24651	3.08187	-0.378695	0	-0.217505	1.09686	0.93689
MSMEG_0963	1.67138	9.65745	1.71412	4.80951	4.51009	3.51117	5.68843	2.17726	5.19673	2.96983	0.752375	0	0.551829	1.16229	1.70622
MSMEG_0964	3.89921	8.87545	1.00859	6.16263	6.22844	5.27301	6.77826	1.50525	5.24425	2.61709	0.311023	0	-0.0819565	1.09054	1.07244
MSMEG_0965	8.87297	17.0265	1.53763	12.7057	12.5123	11.6983	13.7358	2.03754	5.25023	2.6287	0.236378	0	0.32623	1.2114	1.48063
MSMEG_0966	0.822814	8.35763	1.33449	4.02941	3.86291	3.04999	4.93133	1.88134	5.20321	3.12619	0.512635	0	0.122821	1.21167	1.27722
MSMEG_0967	1.08825	6.16665	0.978584	3.12859	3.10743	2.34101	3.77171	1.4307	5.20894	3.01135	0.446193	0	-0.262307	1.24089	0.892089
MSMEG_0968	3.32517	11.5195	1.79411	7.32334	7.54074	5.94486	8.51029	2.56543	5.2265	2.3079	-0.158076	0	0.720091	1.07402	1.87449
MSMEG_0969	5.71287	8.89028	0.678734	7.57906	7.70327	7.1282	8.06329	0.935081	5.25342	2.81462	-0.627694	0	-0.399274	1.07801	0.755121
MSMEG_0970	5.28892	9.30568	0.858534	7.70152	7.75104	7.2379	8.33014	1.09224	5.25116	2.94569	-0.51127	0	-0.222203	1.08074	0.932192
MSMEG_0971	5.23958	9.57113	0.946514	7.83674	7.95345	7.32425	8.44742	1.12317	5.25002	2.81074	-0.548592	0	-0.13745	1.08396	1.01695
MSMEG_0972	3.93193	9.21786	0.868071	6.71056	6.79676	6.11434	7.27428	1.15994	5.24908	3.03482	-0.0514026	0	-0.210321	1.07839	0.944074
MSMEG_0973	3.90203	9.31067	0.992573	7.47744	7.62092	6.8218	8.21643	1.39463	5.24841	3.04607	-0.581443	0	-0.0834939	1.07607	1.0709
MSMEG_0974	6.0005	9.48352	0.811902	7.96705	8.12906	7.5075	8.50894	1.00144	5.2522	2.73995	-0.613622	0	-0.275081	1.08698	0.879314
MSMEG_0975	5.09304	9.81921	0.693047	7.46329	7.41073	6.97334	7.93121	0.957873	5.25321	3.58967	0.231191	0	-0.382781	1.07583	0.771614
MSMEG_0976	4.53591	11.6856	1.47721	7.08533	6.8205	6.15119	7.61309	1.4619	5.23669	3.45633	0.847184	0	0.403208	1.074	1.5576
MSMEG_0977	3.62648	9.43542	1.05759	6.96244	6.97144	6.25136	7.5925	1.34113	5.24577	3.50623	-0.131549	0	-0.0180093	1.0756	1.13639
MSMEG_0978	5.76407	9.41566	0.608509	8.01695	8.0964	7.71902	8.42852	0.7095	5.25455	4.46486	-0.953831	0	-0.479544	1.08805	0.674852
MSMEG_0979	0.630926	6.37105	1.16348	4.37117	4.62713	3.62696	5.2442	1.61724	5.21825	2.85561	-0.679312	0	-0.0291322	1.19262	1.12526
MSMEG_0980	1.10907	8.54108	1.56496	4.17695	3.97199	3.12892	4.96046	1.83154	5.18918	3.26627	0.703048	0	0.36082	1.20414	1.51522
MSMEG_0981	0	8.08985	1.43588	2.39224	2.03716	1.28322	3.17565	1.89242	5.08419	4.08409	1.02057	0.0104167	0.193708	1.24218	1.3481
MSMEG_0982	1.54102	8.13973	1.07052	4.34009	4.18959	3.59726	4.85842	1.26116	5.22833	4.33022	0.893344	0	-0.124095	1.19462	1.0303
MSMEG_0983	4.68255	8.84728	0.832461	6.47049	6.34737	5.86066	7.00185	1.1412	5.24934	2.93797	0.397012	0	-0.249361	1.08182	0.905034
MSMEG_0984	1.59322	7.89185	1.20514	3.96358	3.74681	3.18731	4.43853	1.25122	5.2138	4.04898	0.973702	0	-0.00968019	1.21482	1.14472
MSMEG_0985	6.20981	11.3139	0.855942	9.3705	9.28648	8.8111	9.75242	0.941317	5.25335	3.60447	0.183099	0	-0.254399	1.11034	0.899996
MSMEG_0986	3.83096	9.17314	0.878876	6.02219	6.05595	5.42922	6.54202	1.11281	5.24693	3.9268	0.318438	0	-0.217428	1.0963	0.936968
MSMEG_0987	6.0042	12.0918	1.10292	8.97396	9.0111	8.28278	9.761	1.47823	5.24991	2.68085	-0.068541	0	0.000606519	1.10231	1.155
MSMEG_0988	1.86697	11.5947	2.44649	6.03692	5.26886	3.88643	8.65198	4.76555	5.17578	1.66532	0.321988	0	1.35079	1.0957	2.50518
MSMEG_0989	4.53719	9.72621	0.916358	7.59477	7.60917	7.0699	8.15934	1.08943	5.25012	3.4471	-0.225186	0	-0.161981	1.07834	0.992414
MSMEG_0990	6.23964	9.13936	0.612682	7.62732	7.70681	7.20034	8.0963	0.895959	5.25427	2.35772	-0.140517	0	-0.466363	1.07904	0.688033
MSMEG_0991	4.96368	9.07184	0.783746	6.90389	7.01005	6.30434	7.4	1.09566	5.25103	2.77075	-0.0509636	0	-0.292546	1.07629	0.861849
MSMEG_0992	1.79599	6.80774	0.905681	4.01429	3.98232	3.4345	4.48601	1.05151	5.23228	4.10383	0.479507	0	-0.306718	1.2124	0.847678
MSMEG_0993	4.30391	8.53507	0.766895	6.26019	6.21658	5.67786	6.74731	1.06946	5.25013	3.34863	0.524892	0	-0.320138	1.08703	0.834257
MSMEG_0994	2.59698	6.95993	0.770448	4.64141	4.60842	4.2379	5.03139	0.793486	5.24383	3.99701	0.36761	0	-0.403185	1.17363	0.75121
MSMEG_0995	0.360226	7.26197	1.58067	3.42313	3.23038	2.42413	4.36046	1.93633	5.1482	2.56065	0.422046	0	0.34206	1.23861	1.49645
MSMEG_0996	0	7.15614	1.37357	2.60259	2.4288	1.71778	3.373	1.65522	5.11308	3.58199	0.671279	0.0104167	0.134458	1.23911	1.28885
MSMEG_0997	0	6.98138	1.37221	2.53309	2.44902	1.43369	3.24135	1.80766	5.10554	3.34432	0.638733	0.015625	0.132095	1.24012	1.28649
MSMEG_0998	0.199053	6.98308	1.2405	2.69925	2.55199	1.90979	3.28211	1.37232	5.15577	4.50642	0.988905	0	0.00196571	1.23853	1.15636
MSMEG_0999	3.34587	7.46345	0.693758	5.07136	4.97458	4.64389	5.37249	0.728594	5.24847	4.37813	0.923968	0	-0.451553	1.14531	0.702842
MSMEG_1000	0	5.76059	1.04791	1.52209	1.35592	0.808253	1.90236	1.0941	5.04823	7.39484	1.77226	0.015625	-0.193134	1.24104	0.961261
MSMEG_1001	3.74786	9.80485	1.29172	6.75302	6.82367	5.72036	7.74998	2.02961	5.2391	2.24488	0.0497	0	0.213793	1.07792	1.36819
MSMEG_1060	6.63376	12.2983	1.03349	10.3936	10.7261	9.57471	11.1953	1.6206	5.25242	3.19287	-0.798631	0	-0.103312	1.13681	1.05108
MSMEG_1061	6.14076	9.73871	0.677706	7.65193	7.64902	7.11072	8.13857	1.02785	5.25361	2.78364	0.255629	0	-0.401888	1.07959	0.752507
MSMEG_1062	4.67044	7.87523	0.701784	6.12392	6.13714	5.632	6.67784	1.04585	5.25093	2.22908	8.57326e-05	0	-0.390353	1.09214	0.764043
MSMEG_1063	2.8794	7.33226	0.884779	5.05598	5.07346	4.47568	5.46832	0.992637	5.24225	3.32467	0.271284	0	-0.261516	1.14629	0.89288
MSMEG_1064	6.28287	12.4935	1.03665	9.274	9.38653	8.77842	9.87038	1.09196	5.25123	3.83237	0.00684431	0	-0.0716065	1.10825	1.08279
MSMEG_1065	2.48257	7.02033	0.948497	4.76487	4.83998	4.19507	5.44567	1.2506	5.23721	2.61015	-0.155543	0	-0.216764	1.16526	0.937631
MSMEG_1066	3.92067	9.0204	1.01104	6.49177	6.54161	6.07007	7.0762	1.00613	5.24508	3.23089	-0.286932	0	-0.0703958	1.08144	1.084
MSMEG_1067	2.69479	8.16276	0.787465	5.80188	5.75922	5.34177	6.32629	0.984519	5.24807	4.11136	-0.29661	0	-0.317974	1.10544	0.836421
MSMEG_1068	3.437	8.30797	0.826746	5.54097	5.58433	5.07658	5.93078	0.854202	5.24643	4.43971	0.330447	0	-0.290679	1.11742	0.863717
MSMEG_1069	1.44365	8.85291	1.2283	3.83479	3.62498	3.1581	4.35805	1.19995	5.21183	8.187	1.82489	0	0.00748159	1.22082	1.16188
MSMEG_1070	0	7.57358	1.29923	2.22276	2.01644	1.42509	2.79516	1.37008	5.09617	7.48408	1.61753	0.03125	0.0555987	1.24363	1.20999
MSMEG_1071	0	6.59923	1.07789	2.31105	2.12833	1.6328	2.64526	1.01245	5.15642	7.00308	1.50186	0.00520833	-0.165109	1.243	0.989286
MSMEG_1072	0.737627	6.48086	0.994413	2.29669	2.11691	1.69389	2.63701	0.943121	5.17704	8.98322	2.0183	0	-0.24871	1.24312	0.905685
MSMEG_1073	5.76952	9.40245	0.9146	7.8372	8.04005	7.37397	8.46395	1.08998	5.25052	2.39148	-0.598219	0	-0.169375	1.08398	0.985021
MSMEG_1074	3.246	6.8031	0.705083	5.02894	5.11591	4.75047	5.37267	0.622198	5.24752	3.36943	-0.183654	0	-0.442944	1.14803	0.711451
MSMEG_1075	3.80491	8.19726	0.744921	6.79906	6.95981	6.40482	7.30255	0.897727	5.25127	4.08172	-0.902612	0	-0.33251	1.07743	0.821886
MSMEG_1076	4.02899	14.9177	2.24349	10.957	11.3104	9.16817	12.8197	3.65148	5.23583	2.24645	-0.29533	0	1.08955	1.15395	2.24394
MSMEG_1077	3.3866	10.5976	1.68708	7.20355	6.99794	6.15799	8.36187	2.20389	5.22983	2.46782	0.124543	0	0.613637	1.07344	1.76803
MSMEG_1078	4.4164	8.19396	0.812903	6.37955	6.37985	5.75224	6.99785	1.24561	5.24934	2.31387	-0.0818328	0	-0.270835	1.08374	0.883561
MSMEG_1079	0	7.43338	2.1263	2.47298	1.83295	0.51716	4.19933	3.68217	4.85456	1.9971	0.538233	0.0729167	0.885203	1.2411	2.0396
MSMEG_1080	1.78255	9.36362	1.80875	4.56917	4.01993	3.09854	5.48717	2.38863	5.18412	2.96606	0.889126	0	0.63009	1.17866	1.78449
MSMEG_1081	0	6.86915	1.60977	1.97177	1.52113	0.868969	2.53222	1.66325	4.95249	4.58664	1.40966	0.0572917	0.365726	1.24404	1.52012
MSMEG_1082	0.218109	12.4549	2.97228	3.82184	2.86887	1.95354	4.25683	2.30328	5.00786	4.65856	1.60504	0	1.75086	1.22142	2.90526
MSMEG_1084	0	10.0803	2.50724	2.58168	1.65293	1.09145	2.69979	1.60834	4.88211	4.72997	1.70071	0.0104167	1.26788	1.23936	2.42227
MSMEG_1085	0	7.48782	1.83802	1.83658	1.2221	0.77658	1.92967	1.15309	4.86241	5.29171	1.82201	0.0260417	0.594464	1.24356	1.74886
MSMEG_1086	0	7.51184	1.81123	1.86513	1.24254	0.865375	1.82827	0.962897	4.89972	5.67921	1.94065	0.015625	0.567538	1.2437	1.72193
MSMEG_1087	0	7.96447	1.77224	2.37817	1.82987	1.28017	2.69117	1.411	5.03118	5.43594	1.77694	0.0104167	0.529902	1.24234	1.6843
MSMEG_1088	0	8.97279	1.74332	3.47449	3.05611	2.49283	3.93229	1.43947	5.14661	5.21898	1.55601	0.00520833	0.50611	1.23721	1.66051
MSMEG_1089	0.252699	5.99105	0.963905	2.28093	2.10549	1.7201	2.736	1.01591	5.16907	4.18145	0.766384	0	-0.279341	1.24325	0.875054
MSMEG_1090	1.54407	9.20471	1.0854	5.41151	5.26701	4.76896	5.80608	1.03712	5.23755	4.66556	0.547587	0	-0.0388482	1.12425	1.11555
MSMEG_1091	0	5.94517	1.18373	2.9928	2.96465	2.1862	3.50468	1.31847	5.17259	3.591	0.364481	0.015625	-0.056307	1.24003	1.09809
MSMEG_1092	0	7.8635	1.28929	3.46886	3.39691	2.51524	4.08712	1.57188	5.19003	4.83226	0.943743	0.00520833	0.0519057	1.23738	1.2063
MSMEG_1093	0.315252	5.63319	0.967855	1.9231	1.79652	1.34977	2.22797	0.878197	5.14403	6.7139	1.60823	0	-0.276064	1.24392	0.878332
MSMEG_1094	0.572852	6.92205	1.07576	3.06853	2.97973	2.42714	3.48558	1.05844	5.20057	6.51172	1.40622	0	-0.164818	1.24058	0.989577
MSMEG_1095	0	6.38223	1.10056	2.76407	2.68122	2.1135	3.16824	1.05474	5.17999	5.31302	1.04802	0.00520833	-0.138001	1.23856	1.01639
MSMEG_1096	0	8.04884	1.4142	2.39239	2.26531	1.4307	2.93991	1.50921	5.09299	7.25977	1.54747	0.015625	0.172023	1.24217	1.32642
MSMEG_1097	0.788784	13.2263	2.66813	9.47474	10.0703	7.89699	11.496	3.59899	5.21203	2.96277	-0.906149	0	1.55544	1.11269	2.70984
MSMEG_1098	3.18369	9.82269	1.72772	5.39292	4.75801	4.07988	6.69716	2.61728	5.20969	2.90188	0.951112	0	0.602429	1.12529	1.75682
MSMEG_1099	0	7.71278	1.47563	3.30463	3.29943	2.40144	3.93503	1.53359	5.14441	3.88687	0.38541	0.0364583	0.235105	1.24053	1.3895
MSMEG_1100	0	8.00016	1.32376	4.51304	4.45169	3.8572	5.31603	1.45883	5.2077	4.50992	-0.284045	0.0104167	0.141112	1.18265	1.29551
MSMEG_1101	1.74748	9.03979	1.40701	4.54699	4.41175	3.50618	5.5146	2.00842	5.20947	2.64311	0.310999	0	0.226783	1.18023	1.38118
MSMEG_1102	3.37902	8.50286	0.954789	5.94837	5.95335	5.38791	6.44656	1.05865	5.24463	3.53132	0.21337	0	-0.144534	1.09932	1.00986
MSMEG_1103	3.74457	7.9701	0.771921	6.1108	6.18232	5.71276	6.61234	0.89958	5.24933	3.35445	-0.439094	0	-0.320756	1.09268	0.833639
MSMEG_1105	0	7.54011	1.25053	2.60824	2.39326	1.82171	2.99127	1.16956	5.1519	7.57109	1.64267	0.0104167	0.0114743	1.23906	1.16587
MSMEG_1106	1.17275	7.32856	1.13086	3.63491	3.57888	2.86224	4.09201	1.22978	5.21182	4.25349	1.0118	0	-0.0994286	1.23029	1.05497
MSMEG_1107	0.803031	5.9087	0.854988	2.88355	2.75372	2.34415	3.32216	0.978005	5.2157	5.04471	1.03702	0	-0.384189	1.23918	0.770207
MSMEG_1108	4.76386	8.76348	0.830346	7.39126	7.59371	7.00336	7.98524	0.981886	5.2509	3.84555	-1.09355	0	-0.244417	1.07476	0.909979
MSMEG_1109	6.72642	9.63577	0.603592	8.31317	8.37329	7.91568	8.74224	0.826565	5.25484	2.86203	-0.397178	0	-0.488885	1.09248	0.66551
MSMEG_1110	2.88509	6.81469	0.720595	5.35808	5.48282	4.92068	5.87921	0.958526	5.24814	3.01915	-0.660987	0	-0.4067	1.1273	0.747695
MSMEG_1111	4.34894	7.95848	0.611993	6.07023	6.07802	5.67456	6.47917	0.804614	5.25245	3.50189	0.229234	0	-0.482348	1.09434	0.672048
MSMEG_1112	4.40502	13.5471	2.07593	9.16245	9.47068	7.85646	10.8331	2.97669	5.23061	2.37301	-0.387114	0	0.969986	1.10595	2.12438
MSMEG_1113	1.65522	9.81223	1.81443	5.64427	5.20387	4.34801	6.5297	2.18169	5.20736	2.55373	0.612342	0	0.701981	1.11245	1.85638
MSMEG_1114	2.14371	9.33641	1.75694	5.58262	5.34911	4.25042	7.17133	2.92092	5.2069	2.11178	0.100849	0	0.641571	1.11537	1.79597
MSMEG_1115	1.41966	7.4121	0.801719	5.71531	5.73926	5.31283	6.2386	0.925773	5.24682	7.26962	-1.07916	0	-0.307496	1.10921	0.8469
MSMEG_1116	1.03798	7.81845	1.0776	4.10454	4.08172	3.49305	4.66753	1.17448	5.22261	4.95081	0.438482	0	-0.130325	1.20793	1.02407
MSMEG_1117	0.54971	6.7274	1.06686	3.61738	3.49669	2.90113	4.33444	1.43331	5.21325	3.64864	0.362921	0	-0.164305	1.23116	0.99009
MSMEG_1118	1.5855	7.43559	1.0566	4.05419	3.98317	3.35411	4.60061	1.2465	5.22406	3.72106	0.555921	0	-0.153857	1.21045	1.00054
MSMEG_1119	1.47182	6.37363	0.999721	3.71637	3.77282	2.9639	4.37509	1.41119	5.22062	2.85799	0.130309	0	-0.226631	1.22635	0.927765
MSMEG_1120	1.75792	6.51468	0.768797	3.9325	3.93605	3.44722	4.35203	0.904811	5.23867	4.44306	0.543491	0	-0.447483	1.21628	0.706912
MSMEG_1121	0	5.26025	0.93621	2.03787	2.01689	1.46055	2.49323	1.03268	5.14604	5.24956	0.781222	0.015625	-0.307902	1.24411	0.846493
MSMEG_1123	4.06754	10.0559	1.11819	6.63007	6.61788	5.9372	6.97499	1.03779	5.24383	4.6676	0.946213	0	0.038832	1.07936	1.19323
MSMEG_1124	1.29946	7.88042	1.27651	3.90064	3.57622	3.08381	4.44886	1.36506	5.20772	4.28763	1.13026	0	0.0587455	1.21777	1.21314
MSMEG_1125	2.51416	8.63183	1.20601	4.16443	3.81516	3.45404	4.37694	0.922909	5.22015	5.24061	1.6174	0	0.00120001	1.20481	1.1556
MSMEG_1126	0	6.9832	1.05884	3.39153	3.26584	2.75421	3.6956	0.941388	5.20912	5.16073	0.920832	0.00520833	-0.180447	1.23929	0.973949
MSMEG_1127	1.6955	7.859	1.16048	3.28654	2.98465	2.61302	3.39951	0.786492	5.20301	5.91212	1.69764	0	-0.0801994	1.24068	1.0742
MSMEG_1129	0	12.8385	2.82088	3.31106	2.61224	1.39147	3.67013	2.27866	4.95193	5.85576	1.72794	0.0104167	1.58042	1.24046	2.73482
MSMEG_1130	4.67916	12.3083	1.28043	7.29826	7.15457	6.58829	7.70556	1.11727	5.24311	6.63277	1.49224	0	0.206619	1.07381	1.36101
MSMEG_1131	3.8366	12.9098	2.29153	9.52915	10.1602	7.94488	11.254	3.30911	5.22611	2.4968	-0.740191	0	1.17759	1.11394	2.33198
MSMEG_1132	3.123	10.0543	1.70231	6.13371	5.55792	4.89569	7.38401	2.48832	5.2205	2.35755	0.654525	0	0.610578	1.09173	1.76497
MSMEG_1133	6.22696	10.2832	0.631773	8.76355	8.86275	8.3715	9.19882	0.827326	5.25486	3.97478	-0.702849	0	-0.466892	1.09866	0.687503
MSMEG_1134	4.87062	10.3761	1.11577	7.69925	7.64895	6.97015	8.45329	1.48314	5.24704	2.63804	0.16446	0	0.03509	1.08068	1.18949
MSMEG_1135	0	6.45703	1.28076	1.78352	1.59134	0.957242	2.40488	1.44764	5.00054	5.80909	1.35626	0.078125	0.0375079	1.24326	1.1919
MSMEG_1136	5.72102	10.5478	0.915307	7.81803	7.79887	7.10056	8.46578	1.36522	5.25067	2.71584	0.132332	0	-0.168209	1.08352	0.986187
MSMEG_1137	0.84146	8.41827	1.89276	4.53372	4.06291	3.18754	6.03728	2.84973	5.17038	2.23589	0.440993	0	0.711592	1.18117	1.86599
MSMEG_1138	0.0782434	6.89467	1.14814	2.26312	2.26805	1.59207	2.7397	1.14762	5.13621	7.64423	1.50579	0	-0.0952409	1.24338	1.05915
MSMEG_1139	1.65974	6.48047	0.964849	3.62459	3.52473	2.93029	4.2879	1.35761	5.2229	3.20471	0.581246	0	-0.265954	1.2308	0.888442
MSMEG_1140	4.14932	8.42208	0.979923	5.83342	5.80731	5.08959	6.53439	1.4448	5.2436	2.57162	0.380121	0	-0.124176	1.1041	1.03022
MSMEG_1141	0.149431	5.09581	1.2958	2.03109	1.76139	0.929001	2.90493	1.97592	5.05371	2.35956	0.614157	0	0.0516876	1.24411	1.20608
MSMEG_1142	0.318908	6.81304	1.49786	2.85083	2.70985	1.59142	4.01243	2.42101	5.11611	2.50814	0.453964	0	0.258902	1.23895	1.4133
MSMEG_1143	1.61174	8.39633	1.50637	4.49131	4.43704	3.26722	5.54107	2.27385	5.20093	2.46802	0.300487	0	0.322156	1.18421	1.47655
MSMEG_1144	0.323344	5.2326	1.1376	2.34002	2.29023	1.46359	3.1174	1.65381	5.1358	2.56418	0.39993	0	-0.105139	1.24274	1.04926
MSMEG_1145	0	7.65844	1.51789	4.17606	4.21148	3.0301	5.277	2.2469	5.18559	2.47268	-0.0864826	0.00520833	0.313708	1.20418	1.4681
MSMEG_1146	0.499132	8.02652	1.56054	4.88547	4.80209	3.82898	6.15401	2.32503	5.20343	2.50949	-0.0580525	0	0.403239	1.1573	1.55763
MSMEG_1147	1.14668	7.64977	1.44733	4.26629	4.12295	3.20936	5.29439	2.08503	5.19913	2.58796	0.277478	0	0.24821	1.19912	1.40261
MSMEG_1148	1.46936	8.16037	1.36494	4.70628	4.48867	3.72571	5.69866	1.97295	5.21567	2.71398	0.382828	0	0.195739	1.1692	1.35013
MSMEG_1149	1.25251	8.05627	1.378	4.21128	4.16933	3.33157	5.32029	1.98872	5.20168	2.68797	0.0546771	0	0.175741	1.20226	1.33014
MSMEG_1150	1.31869	6.89995	1.10644	4.26092	4.12242	3.52334	5.2061	1.68275	5.22267	2.59517	-0.0416186	0	-0.0929856	1.19943	1.06141
MSMEG_1151	1.95318	9.19613	1.62097	5.19536	4.85794	3.87197	6.23253	2.36055	5.20952	2.52334	0.448682	0	0.483568	1.13741	1.63796
MSMEG_1152	0	6.63662	1.34896	2.04793	1.7063	1.07709	2.62531	1.54823	5.06074	4.80423	1.34406	0.00520833	0.104844	1.24411	1.25924
MSMEG_1153	0.393988	6.83992	1.23744	2.36368	2.06451	1.55521	2.87007	1.31487	5.13454	4.97654	1.38077	0	-0.00505753	1.24249	1.14934
MSMEG_1154	1.4542	8.47353	1.39256	4.45642	4.35896	3.58105	5.09749	1.51644	5.21023	3.63902	0.748482	0	0.205812	1.18674	1.36021
MSMEG_1155	0	5.97441	1.18975	2.21116	1.94834	1.49534	2.65788	1.16254	5.12493	4.71264	1.31285	0.00520833	-0.0539355	1.24369	1.10046
MSMEG_1156	0.988444	7.74374	1.24457	4.15234	3.90815	3.40479	4.65798	1.25319	5.21411	4.22263	0.86824	0	0.0391241	1.20545	1.19352
MSMEG_1157	0.346683	7.12336	1.23176	2.85455	2.65539	2.10764	3.35876	1.25112	5.16973	5.15593	1.17825	0	-0.00721379	1.23898	1.14718
MSMEG_1158	1.2304	7.72817	1.21699	3.8401	3.70804	3.05631	4.31194	1.25563	5.21017	4.86017	1.10145	0	-0.00357913	1.22057	1.15082
MSMEG_1159	0	7.20886	1.25307	2.43703	2.36537	1.70151	3.03075	1.32924	5.12753	6.53023	1.27976	0.015625	0.0114552	1.24161	1.16585
MSMEG_1160	0	6.58127	1.17778	1.49514	1.34147	0.682876	2.0858	1.40292	4.97671	9.01746	1.95372	0.0520833	-0.0629737	1.24076	1.09142
MSMEG_1161	0	6.03935	0.982818	1.17122	1.10462	0.575358	1.48299	0.907629	4.98479	14.388	2.91668	0.015625	-0.254096	1.23691	0.900299
MSMEG_1162	0	6.39457	1.07206	1.14659	0.957142	0.566286	1.423	0.856718	4.94417	15.87	3.25265	0.0416667	-0.164545	1.23661	0.989851
MSMEG_1164	0	7.09098	1.41006	1.73182	1.35578	0.696566	2.60538	1.90881	4.94857	5.4645	1.41058	0.0416667	0.167154	1.24291	1.32155
MSMEG_1165	4.81953	8.27114	0.682891	6.6386	6.60392	6.12476	7.13841	1.01364	5.25223	2.41148	0.10127	0	-0.396358	1.07925	0.758038
MSMEG_1167	4.4706	10.3219	1.12597	7.05854	6.86366	6.29701	7.52543	1.22843	5.24518	3.43381	0.761279	0	0.051664	1.07431	1.20606
MSMEG_1168	0.57703	6.75645	1.09467	3.65032	3.72227	2.82775	4.32645	1.49869	5.21112	3.52682	0.228392	0	-0.134868	1.22953	1.01953
MSMEG_1169	4.80882	11.5888	1.42159	8.07268	7.9285	6.92049	9.14569	2.22519	5.24183	2.24771	-0.0586789	0	0.33243	1.08916	1.48683
MSMEG_1170	0	7.44052	1.47941	3.61042	3.68343	2.5829	4.61723	2.03434	5.16033	2.74777	-0.111865	0.0208333	0.247904	1.23151	1.4023
MSMEG_1171	0.978581	7.02163	1.27066	3.25417	3.07311	2.46064	3.83476	1.37412	5.18336	3.54486	0.752514	0	0.0297729	1.24088	1.18417
MSMEG_1172	1.27461	9.18853	1.46064	3.73335	3.42381	2.88814	4.15878	1.27064	5.18793	5.48723	1.37442	0	0.235089	1.22555	1.38948
MSMEG_1173	1.15143	10.3651	1.74348	3.77631	3.3575	2.74375	4.26365	1.5199	5.16503	5.65706	1.61522	0	0.519945	1.22353	1.67434
MSMEG_1174	0.641847	11.8555	2.11118	3.5698	3.13959	2.19525	4.04431	1.84906	5.11422	7.37967	1.99	0	0.877659	1.23352	2.03205
MSMEG_1175	1.3435	9.79911	1.32567	5.10947	5.03876	4.20444	6.20839	2.00395	5.2234	3.06838	0.20424	0	0.182792	1.14288	1.33719
MSMEG_1176	4.2704	8.79462	1.02447	6.49221	6.55701	5.85046	7.20748	1.35701	5.24494	2.31136	-0.0771057	0	-0.0569608	1.08143	1.09743
MSMEG_1177	1.74491	9.7112	1.53061	4.47884	4.23719	3.45306	5.3441	1.89104	5.20155	3.98428	0.854666	0	0.345492	1.18511	1.49989
MSMEG_1178	2.02181	11.1166	1.91409	6.17939	5.67523	4.80121	7.443	2.64178	5.21055	2.4006	0.50465	0	0.824212	1.08988	1.97861
MSMEG_1179	2.98258	11.0082	1.81548	6.63045	6.0091	5.33777	8.05453	2.71675	5.22132	2.45679	0.631909	0	0.73613	1.07935	1.89053
MSMEG_1180	2.09699	10.2768	1.85257	5.53504	4.91339	4.2873	6.81453	2.52723	5.2035	2.56627	0.659098	0	0.734846	1.11772	1.88924
MSMEG_1181	1.06507	8.87063	1.83577	4.22851	3.61317	3.0045	4.97904	1.97454	5.16819	2.70177	0.812828	0	0.634476	1.20129	1.78887
MSMEG_1182	1.08853	8.83175	1.71747	4.29064	3.74551	3.14805	5.11509	1.96704	5.18188	2.78379	0.845749	0	0.519804	1.19767	1.6742
MSMEG_1183	2.15566	9.55539	1.53777	5.5536	5.06649	4.62511	6.36489	1.73977	5.22026	2.82511	0.623954	0	0.420969	1.1168	1.57536
MSMEG_1184	3.84306	11.6226	1.60207	6.92139	6.60758	5.80449	7.54882	1.74433	5.23215	3.6401	0.980115	0	0.525976	1.07609	1.68037
MSMEG_1185	2.45958	8.58489	1.26819	4.45653	4.12755	3.66838	4.74399	1.07561	5.22059	4.46849	1.35075	0	0.0814501	1.18674	1.23585
MSMEG_1186	0.383841	6.66605	1.29613	2.28542	1.89983	1.30613	3.09685	1.79072	5.10972	4.39243	1.16826	0	0.0529173	1.24321	1.20731
MSMEG_1187	0.881906	7.47424	1.46156	3.70409	3.70686	2.49784	4.78024	2.28241	5.17918	2.60986	0.394517	0	0.234621	1.22694	1.38902
MSMEG_1188	6.75057	10.7662	0.639967	8.33185	8.29169	7.93146	8.65796	0.726499	5.25462	5.38414	0.984015	0	-0.452719	1.09269	0.701676
MSMEG_1189	3.84232	7.77386	0.69664	5.82857	5.92568	5.40572	6.28556	0.879843	5.2502	3.67685	-0.443439	0	-0.407664	1.1043	0.746731
MSMEG_1190	1.85997	8.95213	1.30285	4.93806	5.18661	3.9047	5.72752	1.82282	5.22204	3.55702	0.176502	0	0.148969	1.15388	1.30336
MSMEG_1191	0.183601	5.20607	1.10966	2.74035	2.85318	1.95534	3.64082	1.68547	5.16569	2.35909	-0.200383	0	-0.128856	1.23852	1.02554
MSMEG_1192	0	7.58476	1.56436	2.36753	2.01295	1.40368	2.77914	1.37546	5.06426	4.88852	1.4406	0.00520833	0.321908	1.24245	1.4763
MSMEG_1193	3.27805	15.0294	1.78471	6.6451	6.0817	5.30896	7.7942	2.48524	5.22352	4.62379	1.03485	0	0.705546	1.07917	1.85994
MSMEG_1194	2.99089	7.34201	0.842339	5.54581	5.56583	5.08513	6.09313	1.00801	5.24569	3.1879	-0.301325	0	-0.274844	1.11718	0.879551
MSMEG_1195	4.59343	8.81046	0.651614	6.98721	7.05337	6.53377	7.4335	0.899727	5.25311	3.47063	-0.27031	0	-0.423671	1.07528	0.730725
MSMEG_1196	3.42983	7.87601	0.871585	5.14942	5.02249	4.48514	5.66837	1.18322	5.24361	3.54754	0.715333	0	-0.268746	1.14033	0.885649
MSMEG_1198	3.04751	7.86128	0.877609	5.21977	4.99846	4.67658	5.54462	0.868047	5.24401	3.8889	1.01842	0	-0.258242	1.13585	0.896154
MSMEG_1199	2.58999	8.56571	0.851949	6.20573	6.16624	5.62349	6.81407	1.19057	5.2479	3.91518	-0.181382	0	-0.236943	1.08889	0.917452
MSMEG_1200	1.57144	9.03691	1.36771	5.20565	5.22611	4.31508	6.06623	1.75115	5.22253	3.39974	0.248503	0	0.230959	1.13675	1.38535
MSMEG_1201	0.976372	5.61808	0.884487	2.45967	2.37667	1.83324	2.87552	1.04228	5.19771	5.28954	1.23657	0	-0.356806	1.24129	0.797589
MSMEG_1203	1.8177	8.48604	1.50242	4.75119	4.33053	3.52165	6.09422	2.57257	5.20783	2.06494	0.325958	0	0.336238	1.16618	1.49063
MSMEG_1204	3.97009	8.65939	1.12902	5.68747	5.45976	4.8537	6.32022	1.46652	5.23853	3.01247	0.743451	0	0.0185557	1.11046	1.17295
MSMEG_1205	2.6679	9.41727	1.32677	5.83947	5.82889	4.89062	6.69615	1.80553	5.23122	2.81565	0.0313581	0	0.222922	1.10384	1.37732
MSMEG_1207	0.66353	8.43929	1.76853	3.99165	3.56205	2.68475	4.99887	2.31413	5.16256	2.689	0.688892	0	0.555041	1.21349	1.70944
MSMEG_1208	0	7.14535	1.55097	2.8625	2.59999	1.82035	3.48211	1.66176	5.11328	3.29942	0.833636	0.00520833	0.311937	1.23903	1.46633
MSMEG_1209	1.29361	8.46364	1.22609	4.65794	4.63732	3.88724	5.33271	1.44547	5.22309	4.21239	0.538245	0	0.053589	1.1725	1.20798
MSMEG_1210	4.40253	7.50869	0.676319	5.6294	5.47661	5.14441	6.02162	0.87721	5.25049	3.1692	0.76746	0	-0.436823	1.11314	0.717573
MSMEG_1211	4.02007	7.40616	0.628724	5.90464	5.93552	5.46689	6.3061	0.839207	5.25181	2.68054	-0.105892	0	-0.4724	1.10112	0.681995
MSMEG_1212	0	9.80377	1.74838	4.12746	3.78864	3.04696	4.85153	1.80458	5.16794	3.57239	0.725813	0.00520833	0.541626	1.20675	1.69602
MSMEG_1213	2.30819	7.11894	0.956365	4.43076	4.23335	3.69622	5.15571	1.4595	5.2348	3.03888	0.581153	0	-0.232208	1.18857	0.922188
MSMEG_1214	1.80752	6.86283	0.863123	3.89132	3.79737	3.35677	4.44966	1.09289	5.23367	4.03439	0.735288	0	-0.355077	1.2182	0.799318
MSMEG_1215	7.04519	10.7896	0.738818	8.62773	8.47741	8.2299	8.83285	0.602949	5.25396	4.85429	1.27556	0	-0.357741	1.09656	0.796654
MSMEG_1216	2.31263	9.38448	1.51218	5.49222	5.35755	4.28	6.30053	2.02053	5.22011	2.54335	0.420482	0	0.392271	1.11991	1.54667
MSMEG_1217	0.90765	7.04647	1.51856	3.35276	2.79715	2.2712	4.13007	1.85887	5.16207	2.787	0.912123	0	0.278618	1.23995	1.43301
MSMEG_1218	1.04674	7.35476	1.44672	3.84847	3.48998	2.92179	4.52882	1.60704	5.19005	2.96645	0.797513	0	0.226531	1.22019	1.38093
MSMEG_1219	1.77473	9.24069	1.74986	5.39104	4.82642	4.11806	6.75662	2.63856	5.2062	2.28802	0.539635	0	0.62446	1.1254	1.77886
MSMEG_1220	1.75335	8.68701	1.41828	4.54647	4.27279	3.66732	5.16158	1.49426	5.21042	3.26017	0.704004	0	0.23801	1.18027	1.39241
MSMEG_1221	0.669236	7.54337	1.10832	3.64231	3.68198	2.85019	4.24587	1.39568	5.21171	4.07061	0.61102	0	-0.121609	1.22993	1.03279
MSMEG_1222	2.2775	7.02502	0.876269	4.17613	4.21434	3.59714	4.71699	1.11984	5.23566	3.6748	0.388111	0	-0.327912	1.20418	0.826483
MSMEG_1223	0.921514	6.93327	1.01388	3.753	3.7108	3.20036	4.22444	1.02408	5.2211	4.23278	0.520081	0	-0.210743	1.22462	0.943652
MSMEG_1225	2.11368	10.1129	1.3529	5.97549	5.67542	5.24541	6.66201	1.4166	5.2324	5.05385	0.747624	0	0.254684	1.09821	1.40908
MSMEG_1226	2.30185	7.36267	0.843505	4.37494	4.40601	3.81061	4.77899	0.968381	5.23953	5.18777	0.863159	0	-0.348862	1.19237	0.805533
MSMEG_1227	0.308897	5.44593	1.05338	1.93357	1.66507	1.25537	2.18765	0.932275	5.12846	5.1796	1.54164	0	-0.190572	1.24395	0.963823
MSMEG_1228	0.393988	7.38805	1.21647	2.61216	2.50386	1.98372	3.11688	1.13316	5.15597	7.29915	1.46399	0	-0.0225439	1.23902	1.13185
MSMEG_1229	0	7.4223	1.156	2.55184	2.3883	1.92246	2.8534	0.930941	5.16845	8.8377	2.03008	0.00520833	-0.083798	1.2398	1.0706
MSMEG_1232	0	8.06713	1.90524	1.31818	0.570604	0.273011	1.18127	0.908259	4.5115	5.86005	2.02661	0.09375	0.666511	1.23873	1.82091
MSMEG_1233	0	7.83465	1.80417	1.07775	0.390279	0.19593	0.656908	0.460978	4.35492	6.70319	2.25141	0.0833333	0.568423	1.23575	1.72282
MSMEG_1235	0	6.6856	1.50293	2.02428	1.6814	1.02289	2.45297	1.43008	5.00696	4.43424	1.33528	0.0104167	0.258827	1.24411	1.41322
MSMEG_1236	2.06744	12.0822	1.7427	6.68966	6.44272	5.62515	7.27223	1.64708	5.2253	4.32219	1.01314	0	0.664064	1.07863	1.81846
MSMEG_1237	1.75279	9.40169	1.50527	5.2981	4.9053	4.26723	6.17045	1.90322	5.21884	3.19309	0.783735	0	0.374374	1.13089	1.52877
MSMEG_1238	3.75498	11.3671	1.424	7.75264	7.66716	7.08602	8.75508	1.66906	5.24017	3.1296	-0.20859	0	0.342049	1.08195	1.49644
MSMEG_1240	2.10094	8.51374	1.39964	5.50347	5.62816	4.54536	6.38963	1.84427	5.22394	2.66808	-0.121328	0	0.280309	1.11933	1.4347
MSMEG_1241	0	6.40185	1.23049	2.79964	2.9205	2.09531	3.55835	1.46304	5.14844	3.13559	0.0629422	0.00520833	-0.00818779	1.23868	1.14621
MSMEG_1242	4.91748	9.96367	0.915432	7.86502	8.03401	7.28571	8.40324	1.11753	5.25057	3.26888	-0.503502	0	-0.169205	1.08464	0.98519
MSMEG_1243	5.02803	9.96831	0.855127	7.52502	7.60313	7.06014	8.05109	0.990955	5.25092	3.56596	-0.420514	0	-0.221802	1.07693	0.932593
MSMEG_1244	6.5381	11.2041	0.831541	9.41972	9.54111	9.01286	9.91469	0.90183	5.2535	4.14834	-0.832139	0	-0.279896	1.11144	0.8745
MSMEG_1245	5.12679	9.93344	0.986962	8.0819	8.11676	7.594	8.78818	1.19418	5.24972	3.98426	-0.897726	0	-0.10237	1.08933	1.05203
MSMEG_1246	4.69686	10.6325	1.04367	8.35069	8.29923	7.73144	9.10625	1.3748	5.2495	3.33918	-0.449254	0	-0.0492364	1.0929	1.10516
MSMEG_1247	2.97521	9.06725	1.21446	6.84061	7.033	6.19294	7.65205	1.45912	5.2407	3.39958	-0.811998	0	0.137469	1.07699	1.29186
MSMEG_1248	2.76603	8.99202	1.23151	6.17995	6.17447	5.31571	7.2281	1.91239	5.23728	2.52755	-0.074468	0	0.141651	1.08986	1.29605
MSMEG_1249	2.20049	7.36411	0.945603	4.5032	4.36303	3.85674	5.05861	1.20187	5.23595	2.88665	0.53362	0	-0.237753	1.18336	0.916643
MSMEG_1250	0.939553	5.28634	0.760704	3.24668	3.27968	2.78693	3.64686	0.859933	5.22933	3.29664	0.0397875	0	-0.480211	1.24092	0.674184
MSMEG_1251	0.951014	6.61183	1.10125	3.59509	3.38293	2.90349	4.21589	1.3124	5.21196	3.34033	0.690634	0	-0.131039	1.23228	1.02336
MSMEG_1252	7.95375	12.7195	0.840188	10.639	10.7656	9.88756	11.1852	1.29766	5.25439	2.75129	0.0363155	0	-0.303911	1.1441	0.850484
MSMEG_1253	4.47346	10.1191	1.02195	7.18312	7.06481	6.61117	7.84689	1.23572	5.24735	3.25345	0.0793162	0	-0.0515049	1.07345	1.10289
MSMEG_1254	6.80025	11.0865	0.903027	9.61648	9.74791	9.10996	10.2615	1.15154	5.25297	3.50418	-0.834366	0	-0.212988	1.11602	0.941407
MSMEG_1255	5.16768	10.1052	0.9026	8.73712	8.8934	8.24294	9.41485	1.17191	5.25194	4.21509	-1.07977	0	-0.195639	1.09824	0.958756
MSMEG_1256	1.40563	6.83482	0.975793	5.01606	5.17557	4.27476	5.7463	1.47154	5.23718	3.49685	-0.724229	0	-0.173061	1.14885	0.981335
MSMEG_1259	0	6.67287	1.88874	2.35535	1.79113	0.800858	3.75406	2.9532	4.91599	2.15673	0.605292	0.0729167	0.646157	1.24258	1.80055
MSMEG_1260	2.92187	7.21467	0.929499	5.34319	5.40547	4.73248	5.99044	1.25796	5.24206	2.59152	-0.183973	0	-0.198671	1.12817	0.955724
MSMEG_1261	2.12807	6.53525	0.865081	4.79871	4.87783	4.24567	5.49676	1.25109	5.24056	2.88209	-0.479502	0	-0.297928	1.16301	0.856467
MSMEG_1262	1.8835	5.89741	0.778987	4.07362	4.05352	3.56676	4.53839	0.971628	5.23874	3.02787	-0.156235	0	-0.430502	1.20949	0.723893
MSMEG_1263	1.76986	9.85731	1.52947	4.59878	4.34086	3.60915	5.15021	1.54106	5.20653	5.03641	1.25582	0	0.352876	1.17659	1.50727
MSMEG_1264	2.09411	8.85099	1.45142	4.40592	4.0515	3.45992	4.94409	1.48417	5.20847	4.36768	1.35187	0	0.261129	1.19029	1.41552
MSMEG_1265	4.77104	10.9992	1.34	7.97021	7.82354	7.00415	8.95124	1.94709	5.24351	2.38069	0.293529	0	0.252944	1.08705	1.40734
MSMEG_1266	0.643794	8.65992	1.27111	3.30859	3.10406	2.59992	3.58876	0.988842	5.19082	6.04396	1.50651	0	0.0306248	1.24049	1.18502
MSMEG_1267	2.83996	11.0896	1.35708	6.3048	6.12487	5.51411	6.76992	1.25582	5.2355	5.92243	1.16496	0	0.271392	1.08568	1.42579
MSMEG_1268	3.30775	10.4726	1.22243	6.36024	6.27124	5.66179	6.96857	1.30678	5.23973	5.31724	0.949038	0	0.138226	1.0842	1.29262
MSMEG_1269	2.10371	10.4651	1.44084	4.63092	4.25916	3.81654	4.92515	1.10861	5.21655	9.43331	2.35082	0	0.266478	1.17436	1.42087
MSMEG_1270	0.507824	8.58064	1.38819	3.17442	2.92178	2.42073	3.54614	1.1254	5.17181	6.35406	1.55785	0	0.14718	1.24101	1.30158
MSMEG_1271	0	6.95795	1.21152	3.26605	3.08505	2.6039	3.66561	1.06171	5.18798	4.55351	0.862225	0.0104167	-0.0293005	1.24082	1.12509
MSMEG_1272	3.36963	10.1717	1.33825	6.42293	6.3149	5.52878	7.14167	1.61289	5.23636	3.55355	0.639511	0	0.255482	1.08277	1.40988
MSMEG_1273	0.108138	5.86591	1.23573	2.226	1.81901	1.33805	2.99816	1.66011	5.11052	2.93121	0.872695	0	-0.0078755	1.24361	1.14652
MSMEG_1274	0.238291	6.47051	0.986122	2.30112	2.22814	1.66224	2.7343	1.07205	5.17496	8.33034	1.73817	0	-0.256965	1.24309	0.897431
MSMEG_1275	1.7072	6.92905	0.946162	3.54124	3.48332	2.94686	4.03361	1.08675	5.22374	5.49743	1.10397	0	-0.288626	1.23479	0.86577
MSMEG_1277	0.415955	5.66427	1.17829	3.35104	3.39814	2.56497	4.27773	1.71276	5.18937	2.44094	-0.270289	0	-0.0616861	1.23997	1.09271
MSMEG_1278	2.49861	7.30195	0.875499	5.67561	5.81952	5.1248	6.36111	1.23631	5.24508	3.14368	-0.656804	0	-0.235505	1.111	0.91889
MSMEG_1279	6.53931	11.7149	0.918912	7.95144	7.81088	7.40452	8.22759	0.823066	5.25132	9.16817	2.25333	0	-0.167724	1.08664	0.986671
MSMEG_1280	3.76962	8.60471	0.887172	5.06925	4.91356	4.64045	5.32051	0.68006	5.24356	8.17147	1.99576	0	-0.258274	1.14545	0.896121
MSMEG_1281	3.46719	8.33785	0.87343	6.04186	6.05217	5.35719	6.53784	1.18065	5.24711	2.94807	0.235727	0	-0.222071	1.0955	0.932324
MSMEG_1282	1.80059	7.06677	0.903261	4.5785	4.67346	4.06081	4.97479	0.913982	5.23765	3.5848	-0.00304021	0	-0.274747	1.17801	0.879648
MSMEG_1283	2.30527	5.93311	0.798826	4.21675	4.27561	3.64785	4.77697	1.12912	5.23908	2.48781	-0.237845	0	-0.403125	1.20195	0.75127
MSMEG_1284	2.2753	6.13715	0.729304	4.38419	4.35114	3.85121	4.84854	0.99733	5.24364	2.70897	0.115934	0	-0.462451	1.19176	0.691944
MSMEG_1285	7.32752	10.49	0.575333	9.35215	9.49238	9.01711	9.81753	0.800419	5.25558	3.11162	-0.760224	0	-0.534605	1.10994	0.61979
MSMEG_1286	5.29039	10.169	1.14935	7.60436	7.36355	6.70471	8.54962	1.84491	5.2462	2.10052	0.271592	0	0.0708037	1.07854	1.2252
MSMEG_1287	1.40065	6.78392	1.17719	3.99703	3.81786	3.08662	5.07142	1.9848	5.2138	2.33694	0.230628	0	-0.0360383	1.21323	1.11836
MSMEG_1288	3.635	8.88045	1.00118	5.78366	5.66028	5.25219	6.1921	0.939905	5.24316	4.42761	0.988883	0	-0.105041	1.10622	1.04935
MSMEG_1289	1.10987	7.41444	1.12964	3.75351	3.75318	3.04053	4.30548	1.26495	5.21261	3.93964	0.56755	0	-0.0949603	1.2246	1.05944
MSMEG_1290	0.53982	8.74017	1.59526	3.2044	2.99126	2.04471	4.0543	2.00959	5.14249	4.93529	1.18444	0	0.354244	1.24102	1.50864
MSMEG_1291	3.34856	10.2892	1.34239	6.93422	6.68658	5.86992	7.92545	2.05554	5.23899	2.66705	0.361153	0	0.26645	1.07594	1.42085
MSMEG_1292	3.41744	9.73288	1.2875	6.10809	5.76233	5.17345	6.70767	1.53422	5.23634	3.06887	0.881405	0	0.194714	1.09279	1.34911
MSMEG_1293	3.27593	13.1549	1.95342	6.472	6.03731	5.02963	7.4067	2.37707	5.2155	4.40315	1.21111	0	0.871624	1.08179	2.02602
MSMEG_1294	0.211927	7.62102	1.6229	2.89697	2.65682	1.72098	4.03881	2.31783	5.09604	2.85959	0.555511	0	0.383621	1.23928	1.53802
MSMEG_1295	0.296903	9.22258	1.55638	5.12284	5.01736	3.96939	6.13519	2.1658	5.20954	3.22279	0.186564	0	0.414353	1.14202	1.56875
MSMEG_1296	2.90486	9.8353	1.34297	5.67887	5.33789	4.70178	6.52271	1.82093	5.23048	3.38772	0.709722	0	0.23211	1.11086	1.38651
MSMEG_1297	1.96722	8.25352	1.43745	4.58654	4.31344	3.42475	5.81393	2.38918	5.20816	2.23799	0.247298	0	0.260004	1.17744	1.4144
MSMEG_1298	1.37165	9.15223	1.54856	4.88832	4.78154	3.76236	5.96447	2.20211	5.20757	2.85058	0.428264	0	0.391447	1.15711	1.54584
MSMEG_1299	1.99673	10.5114	1.48502	4.29995	3.92548	3.3524	4.88332	1.53092	5.20389	5.67617	1.47517	0	0.28791	1.19711	1.44231
MSMEG_1300	0	6.92225	1.44647	2.45239	2.10101	1.4995	3.01806	1.51856	5.094	3.50944	1.0363	0.00520833	0.20507	1.2414	1.35947
MSMEG_1301	0	6.7938	1.56537	2.07206	1.63879	1.01782	2.43094	1.41312	5.00897	4.12228	1.38698	0.00520833	0.321272	1.2441	1.47567
MSMEG_1302	0	6.45556	1.66557	1.57892	1.05899	0.516456	1.75093	1.23448	4.79693	4.44154	1.61017	0.0572917	0.423961	1.24161	1.57836
MSMEG_1303	3.03369	12.6041	1.88444	7.7992	7.62088	6.57049	9.13098	2.56049	5.22778	2.67511	0.0591011	0	0.801376	1.08306	1.95577
MSMEG_1304	1.93993	8.21145	1.09057	4.22508	4.17742	3.48788	4.763	1.27512	5.22618	5.72669	1.19097	0	-0.11091	1.20148	1.04349
MSMEG_1305	2.25828	5.81482	0.792806	3.96425	3.87779	3.37395	4.41213	1.03818	5.23784	2.5888	0.420723	0	-0.421981	1.21479	0.732414
MSMEG_1306	0	8.29274	1.33327	2.39295	2.24476	1.68167	2.73659	1.05492	5.12713	10.3966	2.28071	0.00520833	0.0910991	1.24217	1.24549
MSMEG_1308	0	7.57706	1.25687	1.39824	1.12328	0.796127	1.51919	0.723065	4.97937	15.872	3.31632	0.0208333	0.017192	1.23968	1.17159
MSMEG_1311	5.42259	8.91542	0.817103	7.62074	7.78034	7.15662	8.29072	1.13411	5.25159	2.73385	-0.736855	0	-0.261797	1.0789	0.892598
MSMEG_1312	0.804174	6.7055	1.32272	2.81391	2.41797	1.9278	3.33508	1.40728	5.15714	3.70048	1.14869	0	0.0839787	1.23874	1.23837
MSMEG_1313	3.71738	8.88533	1.02137	6.07652	5.90889	5.43262	6.33915	0.906525	5.24395	3.57781	0.907833	0	-0.0727151	1.09408	1.08168
MSMEG_1314	0.789544	8.6196	1.56416	4.27751	4.00037	3.23399	4.98194	1.74794	5.19251	3.23226	0.722205	0	0.365703	1.19845	1.5201
MSMEG_1315	3.48077	10.9793	1.98783	7.42646	7.49716	6.0562	9.21608	3.15989	5.22002	2.05084	-0.252875	0	0.912574	1.07525	2.06697
MSMEG_1316	4.67733	9.81315	0.969314	6.96929	7.16381	6.26422	7.672	1.40778	5.2476	2.59668	-0.416303	0	-0.106199	1.07551	1.0482
MSMEG_1317	4.44865	8.41021	0.711677	6.14944	6.17205	5.71074	6.69956	0.988814	5.25077	3.06113	-0.0873711	0	-0.379404	1.09108	0.774991
MSMEG_1318	0.33614	7.00475	1.12819	2.68378	2.4533	2.02576	2.91282	0.887063	5.1799	6.05469	1.66831	0	-0.110384	1.23857	1.04401
MSMEG_1319	0.566214	10.787	1.89405	3.66474	3.1159	2.4985	4.09565	1.59715	5.14105	5.17084	1.51117	0	0.665216	1.22883	1.81961
MSMEG_1320	0.139934	7.79159	1.61918	2.41538	1.96097	1.45902	2.56425	1.10523	5.0705	5.43818	1.70414	0	0.377285	1.24189	1.53168
MSMEG_1321	0	7.52015	1.46121	3.14834	3.30182	2.09976	4.12878	2.02902	5.13883	3.25902	0.267255	0.015625	0.220255	1.24096	1.37465
MSMEG_1322	6.91909	11.7903	0.962001	9.69574	9.79143	9.17047	10.4032	1.23274	5.25247	3.24389	-0.594676	0	-0.155945	1.11795	0.99845
MSMEG_1323	0.767389	6.49896	1.0507	4.15385	4.27299	3.59412	4.84267	1.24855	5.22281	3.49123	-0.423578	0	-0.154671	1.20537	0.999724
MSMEG_1325	1.84176	7.98671	0.906751	5.38612	5.40846	4.78749	5.81733	1.02984	5.24312	3.98948	0.0383734	0	-0.218928	1.12568	0.935467
MSMEG_1327	2.61367	9.63093	0.942604	6.61313	6.59562	6.05464	7.09005	1.03541	5.24724	5.01981	0.105321	0	-0.136974	1.07958	1.01742
MSMEG_1328	5.87977	11.3696	0.943861	7.61893	7.47898	7.06031	7.84975	0.789444	5.25017	5.13919	1.26433	0	-0.135	1.07886	1.0194
MSMEG_1329	1.11901	6.72715	0.850761	3.18316	3.10669	2.71471	3.53179	0.817079	5.22432	7.73648	1.48746	0	-0.390257	1.24102	0.764138
MSMEG_1330	2.1899	6.2216	0.810459	4.1525	4.22188	3.60603	4.70521	1.09918	5.23802	2.66044	-0.147821	0	-0.394983	1.20544	0.759412
MSMEG_1331	3.21181	7.15536	0.702744	5.46898	5.51704	4.93054	6.00639	1.07586	5.24908	2.81462	-0.366615	0	-0.418387	1.12113	0.736009
MSMEG_1332	1.77423	7.55559	0.942443	4.79193	4.58102	4.08532	5.35324	1.26792	5.23856	3.16412	0.55405	0	-0.221016	1.16346	0.933379
MSMEG_1333	0.94235	7.22106	1.15014	3.72322	3.75871	2.82653	4.31889	1.49236	5.20944	3.51798	0.405846	0	-0.0758908	1.22603	1.0785
MSMEG_1334	5.74836	9.52795	0.820863	8.20835	8.41579	7.90968	8.7641	0.854416	5.25232	3.48595	-1.02295	0	-0.270459	1.09132	0.883937
MSMEG_1335	0	5.73508	1.05666	1.50794	1.3303	0.892747	1.85173	0.958982	5.04257	7.72842	1.88459	0.0208333	-0.184229	1.24089	0.970166
MSMEG_1336	2.21456	9.77834	0.987828	5.0104	5.03425	4.38535	5.49667	1.11132	5.23871	6.68516	0.968136	0	-0.161389	1.14922	0.993006
MSMEG_1339	3.17682	10.4716	1.66981	7.31777	7.63133	5.82782	8.52598	2.69816	5.23073	2.10818	-0.165455	0	0.595846	1.07397	1.75024
MSMEG_1340	5.48495	12.083	1.66759	9.14124	9.49502	7.97566	10.46	2.48435	5.24028	2.15969	-0.433613	0	0.562066	1.10552	1.71646
MSMEG_1341	4.83836	10.8136	1.51625	8.46147	8.73815	7.66498	9.6446	1.97962	5.24043	2.90682	-0.823827	0	0.421986	1.09426	1.57638
MSMEG_1342	2.93448	8.94271	1.39217	6.60269	6.77034	5.71656	7.69514	1.97858	5.23409	2.5492	-0.498419	0	0.312455	1.07972	1.46685
MSMEG_1344	5.71579	10.7989	0.911044	9.14348	9.23147	8.56791	9.89397	1.32606	5.25243	3.53743	-0.556034	0	-0.19452	1.10556	0.959875
MSMEG_1345	6.6555	11.0171	0.79465	9.19781	9.23213	8.71182	9.84621	1.13438	5.25371	3.08349	-0.534142	0	-0.312015	1.10667	0.84238
MSMEG_1346	5.89489	11.502	1.3655	9.42752	9.6924	8.51741	10.469	1.95155	5.24659	2.69851	-0.710126	0	0.253891	1.11161	1.40829
MSMEG_1347	7.87669	14.1232	1.51061	11.6293	11.9678	10.7976	12.7392	1.94158	5.24875	2.8704	-0.759327	0	0.334852	1.17576	1.48925
MSMEG_1348	1.0189	6.52139	1.01422	2.70768	2.61673	2.03064	3.19849	1.16785	5.19185	5.56445	1.17904	0	-0.224297	1.23852	0.930098
MSMEG_1349	4.61121	7.75073	0.802502	6.23226	6.25758	5.67433	6.95049	1.27616	5.24922	2.06968	0.0554982	0	-0.285454	1.08796	0.868941
MSMEG_1350	6.70634	10.8128	0.867727	8.94195	9.00997	8.32667	9.60035	1.27368	5.25273	2.58703	-0.373239	0	-0.233998	1.10173	0.920397
MSMEG_1351	4.49645	12.1744	1.21092	7.59563	7.43197	7.01098	8.00596	0.994982	5.24535	5.48086	1.0978	0	0.132565	1.07836	1.28696
MSMEG_1352	3.74042	8.1925	0.780041	6.4033	6.51731	5.93645	6.94846	1.01202	5.24988	3.49557	-0.540877	0	-0.303151	1.08319	0.851244
MSMEG_1353	6.07132	9.12593	0.590856	7.71472	7.77874	7.36843	8.10073	0.732295	5.25454	3.05637	-0.384308	0	-0.490192	1.08105	0.664204
MSMEG_1354	2.44334	7.49768	0.960619	4.39389	4.25996	3.83864	4.82258	0.983938	5.23445	4.35463	0.819792	0	-0.230488	1.19111	0.923908
MSMEG_1355	1.14496	8.89994	1.18367	5.89049	5.89117	5.13138	6.65736	1.52598	5.23633	4.03065	-0.238529	0	0.0819608	1.10171	1.23636
MSMEG_1356	3.1168	7.24507	0.775499	5.06695	4.92594	4.57588	5.48686	0.910981	5.24604	3.49491	0.584118	0	-0.370094	1.14559	0.784301
MSMEG_1357	0.486256	5.18125	0.858984	2.17463	2.03254	1.64545	2.69306	1.04762	5.1836	5.20414	1.08876	0	-0.384874	1.24386	0.769522
MSMEG_1358	0.824604	10.5598	1.97096	6.05448	6.21618	5.14842	7.21644	2.06802	5.19961	2.757	-0.293649	0	0.875972	1.09499	2.03037
MSMEG_1359	1.59153	7.36538	1.28007	3.89203	3.53073	3.07626	4.38675	1.3105	5.2071	3.47487	1.02384	0	0.0619058	1.21817	1.2163
MSMEG_1360	2.72428	10.6845	1.31884	7.14273	7.00392	6.24176	8.04792	1.80616	5.2402	3.17337	0.00729077	0	0.245262	1.07358	1.39966
MSMEG_1361	5.01712	12.8062	1.93911	8.99933	8.90284	7.47804	10.7764	3.29836	5.23395	1.86035	-0.0617937	0	0.836336	1.10278	1.99073
MSMEG_1362	0	8.29851	2.27955	4.26304	4.61357	2.48288	6.21704	3.73415	5.08453	1.84002	-0.280958	0.015625	1.08024	1.19931	2.23463
MSMEG_1363	4.22587	8.75392	0.866417	6.33467	6.40481	5.81826	6.87313	1.05487	5.24799	3.15958	-0.238025	0	-0.218444	1.08486	0.935951
MSMEG_1364	2.43033	12.2	2.19187	8.99377	9.76018	8.70724	10.3568	1.6496	5.22197	4.57865	-1.58225	0	1.0892	1.10267	2.24359
MSMEG_1365	6.31871	15.3579	1.91164	11.9525	12.4626	11.1078	13.2984	2.19055	5.24361	4.0679	-1.28661	0	0.725142	1.1865	1.87954
MSMEG_1366	3.4387	8.31425	0.981943	6.25523	6.40938	5.67702	6.90553	1.22851	5.2446	3.54604	-0.662258	0	-0.105249	1.08719	1.04915
MSMEG_1367	6.91097	13.3463	1.16331	11.0198	11.1125	10.6925	11.6875	0.994977	5.25157	6.33275	-1.54486	0	0.00737959	1.15593	1.16177
MSMEG_1368	7.45987	14.3033	1.2961	11.4436	11.655	11.1614	12.0883	0.926924	5.25072	5.23721	-1.29283	0	0.126461	1.16964	1.28086
MSMEG_1369	1.41966	7.40104	1.24145	4.08528	4.17444	3.13492	4.86284	1.72792	5.2104	2.49263	0.134478	0	0.0325485	1.2089	1.18694
MSMEG_1370	0	9.02383	2.16964	3.25353	2.84331	1.38718	4.7735	3.38633	5.02609	2.43306	0.552	0.0104167	0.928752	1.24089	2.08315
MSMEG_1371	0	8.391	2.0616	2.54912	1.79281	0.864161	3.82634	2.96218	4.9264	2.60532	0.766361	0.0260417	0.821763	1.23984	1.97616
MSMEG_1372	0	8.14852	1.98203	2.6707	2.09676	1.02773	4.20444	3.17672	4.97523	2.4545	0.679967	0.03125	0.743413	1.23862	1.89781
MSMEG_1373	0	8.5203	1.9149	2.60499	1.93484	1.04496	3.91194	2.86698	4.99016	2.82274	0.810403	0.015625	0.675816	1.23909	1.83021
MSMEG_1374	0.816818	10.9977	2.0114	4.12323	3.39286	2.55092	5.77003	3.2191	5.14292	2.73168	0.707251	0	0.804428	1.20697	1.95882
MSMEG_1375	0.275447	6.88264	1.27988	3.31898	3.31329	2.45358	3.99918	1.5456	5.18203	3.16716	0.447223	0	0.0394978	1.24038	1.19389
MSMEG_1376	1.65722	7.50805	1.1464	4.15103	4.12417	3.45471	4.76862	1.31391	5.21973	3.67381	0.512496	0	-0.0591161	1.20552	1.09528
MSMEG_1377	0.241857	5.89365	0.999093	2.87949	2.85867	2.27658	3.39101	1.11443	5.19414	3.79153	0.260365	0	-0.240055	1.23915	0.914341
MSMEG_1378	1.62808	8.55258	1.17007	4.45624	4.38992	3.74082	5.18151	1.44069	5.22352	3.94566	0.557525	0	-0.0166834	1.18676	1.13771
MSMEG_1379	2.81084	6.0452	0.752937	4.42234	4.51727	3.9235	4.9787	1.0552	5.24269	2.44044	-0.250349	0	-0.436223	1.18916	0.718172
MSMEG_1380	1.10668	6.50451	0.976873	3.94415	3.81005	3.30315	4.43999	1.13683	5.22701	3.25072	0.427286	0	-0.238862	1.21573	0.915534
MSMEG_1381	0.350381	9.48269	1.59563	3.61227	3.38656	2.38648	4.90536	2.51889	5.15998	3.96586	0.662036	0	0.364216	1.23142	1.51861
MSMEG_1382	3.30341	11.9739	1.3975	6.46989	6.26117	5.52524	7.48242	1.95718	5.2349	5.05507	0.794864	0	0.315665	1.08183	1.47006
MSMEG_1383	6.28423	12.6074	0.923108	8.96903	8.94089	8.44167	9.3626	0.920933	5.2524	6.87688	1.29227	0	-0.17911	1.10222	0.975285
MSMEG_1384	3.03042	7.34329	0.80296	5.46393	5.5325	5.08266	5.97401	0.891352	5.2462	4.18993	-0.688285	0	-0.318438	1.1214	0.835957
MSMEG_1385	5.44875	9.38755	0.690941	7.33516	7.33342	6.91911	7.73468	0.815573	5.2531	3.42626	0.259511	0	-0.383185	1.07413	0.77121
MSMEG_1386	0.511082	7.15156	1.19098	2.63394	2.49627	1.96559	3.09287	1.12728	5.16544	6.71196	1.55133	0	-0.0478533	1.23883	1.10654
MSMEG_1387	4.34188	9.20777	0.729851	6.47807	6.33763	5.9858	6.87138	0.885581	5.25132	4.44288	0.815185	0	-0.351831	1.08168	0.802564
MSMEG_1388	3.26251	8.47815	0.802919	5.41173	5.48906	4.9411	5.82703	0.885931	5.24652	4.21672	0.245574	0	-0.32132	1.12424	0.833075
MSMEG_1389	1.3034	6.29305	0.798311	3.47647	3.43113	2.96744	3.76778	0.800339	5.23187	4.41534	0.754622	0	-0.438836	1.23715	0.715559
MSMEG_1390	1.73949	6.39691	0.92631	3.6814	3.57153	3.05736	4.18823	1.13087	5.22653	3.29264	0.575291	0	-0.301713	1.22802	0.852682
MSMEG_1391	1.10625	7.48905	1.13167	3.6318	3.51411	2.87718	4.23394	1.35676	5.21071	5.03197	0.927889	0	-0.098774	1.23045	1.05562
MSMEG_1392	0	12.6954	2.79922	5.18643	4.78964	3.13249	6.91848	3.78599	5.0997	2.68747	0.36485	0.0104167	1.66125	1.13797	2.81564
MSMEG_1393	4.03227	10.1397	1.08599	6.46032	6.42757	5.76949	7.14863	1.37914	5.24344	3.31194	0.269555	0	0.00397941	1.08201	1.15837
MSMEG_1394	2.11359	6.46667	0.804557	4.46496	4.51912	3.90416	5.04788	1.14372	5.24108	2.83826	0.000212256	0	-0.381566	1.18612	0.77283
MSMEG_1395	3.61414	7.32811	0.739974	5.8304	5.79889	5.29903	6.39245	1.09342	5.24938	2.49202	-0.149931	0	-0.364253	1.10423	0.790142
MSMEG_1396	3.07559	6.91452	0.644644	5.36196	5.35106	4.99618	5.82627	0.830092	5.25016	3.38539	-0.291176	0	-0.482426	1.12707	0.67197
MSMEG_1397	3.87933	8.26236	0.998837	6.67742	6.8931	6.14979	7.38695	1.23716	5.24576	3.20026	-0.796303	0	-0.0799378	1.07877	1.07446
MSMEG_1398	5.64275	12.21	1.51204	10.0667	10.429	9.22955	11.1549	1.92537	5.24543	3.86056	-1.14024	0	0.38445	1.12759	1.53885
MSMEG_1399	4.7106	11.216	1.50714	9.06672	9.27416	8.46195	10.104	1.64204	5.24245	4.27286	-1.23976	0	0.403086	1.10406	1.55748
MSMEG_1400	6.02661	12.8708	1.58555	10.6571	10.8776	10.3458	11.7686	1.42283	5.24558	4.20939	-1.25691	0	0.440903	1.14465	1.5953
MSMEG_1401	5.66955	13.6199	1.82813	10.909	11.2811	10.4893	12.2349	1.74565	5.24217	4.00383	-1.31129	0	0.675692	1.15243	1.83009
MSMEG_1402	4.80737	8.80843	0.837278	6.72668	6.64559	6.0464	7.34329	1.29689	5.24986	2.45456	0.383458	0	-0.240934	1.07821	0.913461
MSMEG_1403	5.49156	10.0927	0.886111	8.0786	7.97966	7.3494	8.69257	1.34316	5.25151	2.615	0.143027	0	-0.203159	1.08927	0.951236
MSMEG_1404	0	8.40701	1.79931	3.94715	3.83351	2.95836	4.89772	1.93935	5.1286	3.05481	-0.0572628	0.0572917	0.583716	1.21559	1.73811
MSMEG_1407	0.516648	7.59269	1.35191	3.30226	3.00479	2.48415	3.77329	1.28913	5.17845	4.38919	1.06907	0	0.111357	1.24055	1.26575
MSMEG_1408	0	6.79932	1.12883	1.7655	1.55811	1.08729	2.02897	0.941674	5.09128	10.2709	2.36703	0.0104167	-0.114308	1.24314	1.04009
MSMEG_1409	0.562355	6.58274	0.927132	2.274	2.14788	1.75736	2.55768	0.800324	5.18846	11.94	2.50192	0	-0.316166	1.2433	0.838229
MSMEG_1410	1.8366	7.06687	0.95685	4.4052	4.32484	3.81348	5.15585	1.34237	5.23327	3.03683	-0.0656271	0	-0.23349	1.19034	0.920905
MSMEG_1411	0.616181	7.06186	1.54333	3.21622	2.83442	2.07901	3.94829	1.86928	5.14594	2.69734	0.707594	0	0.302323	1.241	1.45672
MSMEG_1412	1.51842	11.3454	2.00471	5.077	4.51139	3.64883	5.96138	2.31255	5.18514	3.41623	1.00753	0	0.859757	1.14495	2.01415
MSMEG_1413	1.77899	13.1948	2.36261	6.1923	5.85328	4.42497	7.83093	3.40596	5.18734	3.1393	0.728018	0	1.27322	1.08939	2.42762
MSMEG_1414	1.41293	12.0583	2.21189	5.08886	4.84187	3.52658	6.54775	3.02118	5.16631	3.5167	0.790638	0	1.0677	1.14419	2.22209
MSMEG_1415	0.295901	7.70601	1.51729	3.85801	3.91119	2.80035	4.82031	2.01996	5.17374	2.80519	0.0238682	0	0.297551	1.21974	1.45195
MSMEG_1416	4.36327	8.75648	1.05716	7.02855	7.17839	6.25518	7.82572	1.57054	5.24581	2.57993	-0.552103	0	-0.017565	1.07472	1.13683
MSMEG_1417	1.84108	8.66869	1.05688	4.49872	4.54895	3.63562	5.16562	1.53	5.23012	3.80971	0.431979	0	-0.126796	1.18368	1.0276
MSMEG_1418	2.05012	8.25178	1.11464	4.85221	4.70688	4.0353	5.64124	1.60594	5.23106	2.87391	0.234229	0	-0.0448339	1.15948	1.10956
MSMEG_1419	2.28994	13.9876	1.84048	6.514	5.89859	5.3119	8.10421	2.79231	5.21898	3.26672	0.694872	0	0.759425	1.08105	1.91382
MSMEG_1420	2.05761	8.02632	1.28222	5.20245	5.28223	4.17552	6.08321	1.90769	5.22648	2.41879	-0.000341929	0	0.145264	1.13695	1.29966
MSMEG_1421	0	13.8163	3.1209	6.29754	6.09338	4.00916	8.46358	4.45442	5.11895	2.39289	0.0766587	0.015625	2.03501	1.08589	3.1894
MSMEG_1422	2.88473	11.9719	1.93026	7.24381	7.04124	5.95161	8.66814	2.71652	5.22165	2.51347	0.180112	0	0.85674	1.07352	2.01113
MSMEG_1423	5.31641	12.1979	1.5466	9.14892	9.1286	7.81334	10.3592	2.54589	5.24317	1.93892	0.0263882	0	0.440927	1.10567	1.59532
MSMEG_1424	5.24509	13.0067	1.68996	9.41911	9.30369	7.98126	10.9646	2.98335	5.24138	2.15673	0.0877489	0	0.578532	1.11142	1.73293
MSMEG_1425	4.03148	9.91522	1.27071	7.29594	7.31	6.22756	8.21561	1.98806	5.24214	2.35289	-0.086956	0	0.196916	1.0738	1.35131
MSMEG_1426	5.14674	11.1628	1.27144	7.62525	7.52715	6.50827	8.47498	1.9667	5.24396	2.70628	0.576371	0	0.192442	1.079	1.34684
MSMEG_1427	0.258806	7.55889	1.17365	2.25344	2.18778	1.46617	2.71086	1.24469	5.14187	10.6058	2.19756	0	-0.0697945	1.24344	1.0846
MSMEG_1428	3.05063	7.7034	0.925441	5.67765	5.68325	4.97521	6.39969	1.42447	5.24397	2.50166	-0.203678	0	-0.18547	1.11091	0.968925
MSMEG_1429	2.53691	7.5811	1.00302	4.72563	4.69402	4.13905	5.18025	1.04119	5.23516	3.4348	0.390867	0	-0.164878	1.16789	0.989517
MSMEG_1430	1.68346	7.41464	0.892049	4.45878	4.51633	3.92202	4.99262	1.0706	5.23703	4.56252	0.0654858	0	-0.294523	1.18657	0.859872
MSMEG_1431	0.776022	6.65461	1.19667	2.89857	2.65384	2.01743	3.72673	1.7093	5.17561	3.51527	0.809589	0	-0.0426198	1.23929	1.11178
MSMEG_1432	3.06255	7.22141	0.80423	5.30503	5.36481	4.90764	5.72206	0.814427	5.24572	3.44792	-0.311416	0	-0.326238	1.13047	0.828157
MSMEG_1433	0.0848192	10.1732	2.61423	4.7046	4.51316	2.56912	6.6644	4.09529	5.09499	1.9023	0.283763	0	1.44491	1.16932	2.59931
MSMEG_1434	4.13131	8.83625	1.0994	6.88777	7.19647	6.28806	7.64427	1.35621	5.24418	2.59391	-0.716483	0	0.0229272	1.07647	1.17732
MSMEG_1435	3.47168	11.891	1.86411	8.59751	8.92144	7.52575	9.95643	2.43068	5.23181	3.29815	-0.870377	0	0.767988	1.09612	1.92238
MSMEG_1436	3.05255	11.388	1.87701	8.47404	8.91709	7.95345	9.56169	1.60824	5.22997	3.89951	-1.11336	0	0.782587	1.09442	1.93698
MSMEG_1437	3.79203	11.4363	1.77597	8.98407	9.43716	8.64945	9.91483	1.26539	5.23539	4.5304	-1.45018	0	0.67348	1.1025	1.82787
MSMEG_1438	2.781	11.034	1.82874	7.93226	8.25233	7.38228	9.09233	1.71004	5.22776	3.66682	-1.02426	0	0.742533	1.0862	1.89693
MSMEG_1439	4.20259	12.078	1.82979	9.4673	9.88444	9.19465	10.511	1.31639	5.23663	4.273	-1.33589	0	0.717276	1.11251	1.87167
MSMEG_1440	3.50772	11.7942	1.90005	8.50592	8.78862	7.90169	9.54868	1.64699	5.23022	3.41744	-0.821164	0	0.805209	1.09484	1.9596
MSMEG_1441	1.82454	9.39001	1.78708	6.70721	7.08494	6.12908	7.83194	1.70286	5.21635	3.73315	-1.08182	0	0.708651	1.07843	1.86305
MSMEG_1442	4.21808	11.7885	1.83776	9.24601	9.6783	8.95149	10.3515	1.39998	5.23539	4.10042	-1.3218	0	0.730096	1.10766	1.88449
MSMEG_1443	2.78476	11.5348	2.04804	8.55416	9.10147	8.05169	9.97809	1.9264	5.22453	3.84192	-1.25897	0	0.952533	1.0955	2.10693
MSMEG_1444	2.75616	11.2848	1.95808	8.32387	8.83918	7.58486	9.58881	2.00395	5.22653	3.39206	-1.02829	0	0.865483	1.0926	2.01988
MSMEG_1445	5.31069	12.614	1.64806	9.75686	10.1293	9.20778	10.8522	1.64444	5.24225	3.34236	-0.966799	0	0.528593	1.11947	1.68299
MSMEG_1446	0.176176	6.93172	1.63353	4.7075	5.08347	4.08681	5.89309	1.80628	5.18084	3.55205	-1.10614	0	0.464407	1.16912	1.6188
MSMEG_1447	0	6.75521	1.53693	4.04557	4.41384	3.41073	5.00681	1.59608	5.16505	3.20767	-0.880498	0.0104167	0.326054	1.21088	1.48045
MSMEG_1448	4.45189	10.8062	1.35847	7.74832	7.99005	6.66741	8.74389	2.07648	5.24156	2.55416	-0.463947	0	0.276625	1.08184	1.43102
MSMEG_1451	3.36386	7.83082	0.863765	5.3598	5.36248	4.75981	5.88035	1.12054	5.24445	2.7427	0.0455653	0	-0.26343	1.1272	0.890965
MSMEG_1452	2.60982	6.40877	0.721763	4.23009	4.14488	3.74824	4.71638	0.968145	5.24318	3.14314	0.44736	0	-0.479438	1.2012	0.674957
MSMEG_1453	2.71973	7.96539	0.963295	4.45018	4.28816	3.77686	4.90088	1.12402	5.23571	5.74071	1.37409	0	-0.223898	1.18719	0.930497
MSMEG_1455	3.26229	9.795	1.13091	5.58156	5.54672	4.79346	6.13737	1.34391	5.23803	5.20161	1.10403	0	0.015482	1.11542	1.16988
MSMEG_1456	1.33907	7.5064	1.01035	3.53233	3.43865	2.9701	3.98486	1.01475	5.21959	7.17206	1.44184	0	-0.224803	1.23515	0.929592
MSMEG_1457	0	6.19766	1.11167	1.68194	1.54898	1.01266	2.07653	1.06388	5.0502	7.96503	1.72353	0.046875	-0.130852	1.24253	1.02354
MSMEG_1458	0.404625	6.60203	1.07965	3.50207	3.42853	2.9186	4.18785	1.26925	5.20805	3.79847	0.23437	0	-0.156649	1.2363	0.997747
MSMEG_1459	0	4.62687	0.931421	1.50948	1.40864	0.816319	2.01859	1.20227	5.06235	4.04527	0.89271	0.0260417	-0.309487	1.24091	0.844908
MSMEG_1460	0.513355	8.94852	1.36094	2.8369	2.77382	2.01473	3.3398	1.32507	5.15677	9.80967	2.01154	0	0.122067	1.23887	1.27646
MSMEG_1461	0.534445	9.18142	1.35788	3.20269	3.0477	2.47731	3.6119	1.13459	5.17891	9.72607	2.04346	0	0.116862	1.24102	1.27126
MSMEG_1462	0	4.99867	0.802957	1.24323	1.21062	0.810544	1.50704	0.696501	5.06997	11.0082	2.21571	0.0364583	-0.434854	1.23781	0.719541
MSMEG_1463	0.249821	7.19954	1.05425	1.9386	1.86071	1.40642	2.26382	0.857404	5.13896	13.4682	2.7332	0	-0.18971	1.24396	0.964685
MSMEG_1464	0	5.46414	0.965727	0.997254	0.783681	0.379594	1.37939	0.999797	4.8937	12.1687	2.65422	0.0416667	-0.26903	1.23476	0.885365
MSMEG_1465	4.34024	11.4078	1.64763	8.59315	8.86245	7.50143	9.82298	2.32154	5.23798	2.8711	-0.700703	0	0.551576	1.09606	1.70597
MSMEG_1466	4.92701	12.6364	1.82467	9.36264	9.55565	8.49224	10.6512	2.15897	5.23735	3.00383	-0.664211	0	0.714502	1.11017	1.8689
MSMEG_1467	4.54352	11.5681	1.72549	9.24403	9.64996	8.66147	10.4112	1.7497	5.23836	3.85996	-1.18715	0	0.617863	1.10762	1.77226
MSMEG_1468	1.83642	9.12255	1.58104	6.17421	6.40577	5.79267	7.15989	1.36722	5.21963	4.05859	-1.07973	0	0.490955	1.09008	1.64535
MSMEG_1469	4.26666	12.2637	1.84039	9.7262	9.97775	9.23129	10.9462	1.7149	5.23764	4.15011	-1.28718	0	0.721687	1.1187	1.87608
MSMEG_1470	5.92649	12.8529	1.57681	10.1124	10.2311	9.52348	11.2441	1.72065	5.24475	3.1529	-0.742699	0	0.447972	1.12884	1.60237
MSMEG_1471	5.73545	13.0993	1.60057	10.7415	11.144	10.318	11.7562	1.43817	5.24563	3.78737	-1.13938	0	0.453341	1.14723	1.60774
MSMEG_1472	5.07696	11.8257	1.46917	9.65257	9.96867	9.25381	10.6346	1.38077	5.24509	3.81109	-1.14349	0	0.35228	1.11689	1.50668
MSMEG_1473	1.38497	9.79327	1.76885	6.81127	7.0097	5.74284	7.90007	2.15722	5.22092	2.97913	-0.480407	0	0.691546	1.0773	1.84594
MSMEG_1474	4.77443	11.0796	1.44005	8.93321	9.29582	8.09838	9.9871	1.88872	5.24378	2.97182	-0.845966	0	0.338478	1.10157	1.49287
MSMEG_1475	5.04767	9.30843	0.998049	6.92613	6.68312	6.17166	7.6549	1.48324	5.24729	2.45047	0.411354	0	-0.0779874	1.07604	1.07641
MSMEG_1476	5.55165	10.3737	0.930886	7.87054	7.70323	7.29381	8.25105	0.957245	5.2506	3.21405	0.400699	0	-0.153882	1.08477	1.00051
MSMEG_1477	7.05601	12.6735	1.1215	9.83793	9.79555	9.12208	10.672	1.54997	5.25096	3.14582	-0.0923521	0	-3.05976e-05	1.12153	1.15436
MSMEG_1478	1.52721	7.90238	1.22914	5.15987	5.20955	4.42145	6.02561	1.60416	5.22731	3.07529	-0.38941	0	0.0894741	1.13967	1.24387
MSMEG_1479	4.07027	9.51836	0.818066	6.41656	6.46951	6.02302	6.87889	0.855869	5.24937	5.08616	0.203902	0	-0.264837	1.0829	0.889558
MSMEG_1480	1.94366	8.05246	1.02369	4.5298	4.61902	3.99154	5.0365	1.04495	5.23155	4.68503	0.227926	0	-0.157758	1.18145	0.996637
MSMEG_1481	2.41561	8.94506	1.0864	4.63372	4.4728	4.03448	5.07519	1.04071	5.23166	6.29151	1.26346	0	-0.0877626	1.17416	1.06663
MSMEG_1482	3.58975	9.88006	1.08821	6.34253	6.425	5.60848	7.04971	1.44123	5.24285	4.02156	0.320927	0	0.00355925	1.08465	1.15795
MSMEG_1483	5.93008	10.8949	1.10386	9.01474	9.21092	8.39444	9.87278	1.47834	5.2498	2.65466	-0.597268	0	0.000796289	1.10307	1.15519
MSMEG_1484	5.84889	10.8825	1.10672	9.22125	9.64985	8.69019	9.99998	1.30978	5.24992	3.49751	-1.18053	0	-0.000427873	1.10715	1.15397
MSMEG_1485	4.03235	9.59365	1.14769	7.73473	7.97401	7.24245	8.58082	1.33836	5.2457	3.84883	-1.19799	0	0.0661681	1.08152	1.22056
MSMEG_1486	2.37579	9.38623	1.26501	5.11933	5.11641	4.28034	6.03448	1.75414	5.22653	2.65874	0.0918102	0	0.122758	1.14225	1.27715
MSMEG_1487	1.01458	5.39294	0.851283	2.8672	2.70072	2.28762	3.2685	0.980884	5.21515	3.37096	0.768248	0	-0.387779	1.23906	0.766617
MSMEG_1488	0.31041	7.77656	1.44736	2.62124	2.40208	1.63184	3.30453	1.6727	5.11873	5.51838	1.37767	0	0.208425	1.23893	1.36282
MSMEG_1489	0	7.93542	1.32961	3.42068	3.26275	2.68211	3.99236	1.31026	5.18037	5.81103	1.0049	0.015625	0.0909455	1.23866	1.24534
MSMEG_1490	0.413291	6.85621	1.22073	2.07825	1.76868	1.31868	2.51874	1.20005	5.11501	8.13845	2.04581	0	-0.0233675	1.24409	1.13103
MSMEG_1491	0.701899	6.46957	1.13223	2.78458	2.57682	1.97425	3.37192	1.39767	5.17762	4.02196	0.841129	0	-0.106389	1.23862	1.04801
MSMEG_1492	2.94816	6.40677	0.735103	4.82522	4.82422	4.30493	5.36736	1.06243	5.24573	2.475	-0.176203	0	-0.426151	1.16125	0.728244
MSMEG_1493	3.25968	7.61963	0.897355	4.84253	4.60136	4.20592	5.40397	1.19805	5.24095	3.04224	0.750689	0	-0.26276	1.16011	0.891636
MSMEG_1494	2.62486	7.1201	0.943196	4.81777	4.69455	4.10036	5.56036	1.45999	5.23865	2.45531	0.406328	0	-0.218551	1.16175	0.935844
MSMEG_1495	0	10.5814	2.61712	3.2564	2.32697	1.44624	4.07262	2.62638	4.97434	3.71465	1.2984	0.00520833	1.37625	1.24087	2.53064
MSMEG_1496	3.81674	10.1557	1.06881	6.18385	6.10016	5.45777	6.88487	1.4271	5.24288	4.08319	0.592369	0	-0.0209036	1.08971	1.13349
MSMEG_1497	2.57564	10.3207	1.28927	5.76697	5.62325	5.03051	6.61371	1.5832	5.23232	3.78322	0.249447	0	0.18233	1.10694	1.33673
MSMEG_1498	4.36442	11.6859	1.29433	7.31102	7.23318	6.35538	8.15362	1.79824	5.24206	3.13576	0.424815	0	0.220418	1.07391	1.37481
MSMEG_1499	1.05978	7.76888	0.973023	3.49312	3.43724	2.94396	3.86305	0.919089	5.22248	10.0288	1.93565	0	-0.263581	1.2366	0.890814
MSMEG_1500	1.51469	7.48009	0.951577	3.51837	3.50499	2.99918	3.86522	0.86604	5.22351	8.17427	1.50103	0	-0.284122	1.2357	0.870273
MSMEG_1501	5.08656	9.62222	0.682755	6.68562	6.74919	6.17171	7.11763	0.945924	5.25232	4.23898	0.290477	0	-0.395924	1.07868	0.758472
MSMEG_1502	2.78871	9.95834	1.00468	5.28549	5.18146	4.64399	5.80616	1.16217	5.23993	5.15599	0.762853	0	-0.126994	1.13168	1.0274
MSMEG_1503	2.42347	9.97624	1.03481	5.34957	5.25965	4.71875	5.87134	1.15259	5.23912	5.07333	0.622851	0	-0.0929816	1.12779	1.06141
MSMEG_1504	2.33662	8.42601	1.16308	4.66826	4.45067	3.87953	5.52497	1.64544	5.22687	3.08275	0.444616	0	-0.00871209	1.17179	1.14568
MSMEG_1505	3.7047	9.81688	0.840122	6.32804	6.288	5.94596	6.69124	0.745282	5.24895	6.8542	0.964526	0	-0.244917	1.08504	0.909479
MSMEG_1506	0.459102	6.83697	0.819288	4.73205	4.76063	4.23027	5.28277	1.0525	5.24084	6.77155	-0.84529	0	-0.348175	1.16746	0.806221
MSMEG_1507	0	7.51432	1.35483	1.74167	1.44404	0.930518	2.23272	1.3022	5.00297	9.22027	2.15571	0.0260417	0.111847	1.24298	1.26624
MSMEG_1508	0.383535	8.39767	1.26865	3.10032	2.97065	2.46426	3.62888	1.16461	5.18124	9.03872	1.7761	0	0.0278893	1.24076	1.18228
MSMEG_1509	0.881913	6.21586	1.05854	2.49328	2.22719	1.87328	2.69886	0.825574	5.18036	6.20189	1.78671	0	-0.182247	1.24078	0.972148
MSMEG_1510	4.1918	7.1984	0.557685	6.17173	6.22763	5.82454	6.59647	0.771931	5.25333	3.63655	-0.681158	0	-0.532495	1.09018	0.6219
MSMEG_1511	0	9.18312	1.47492	5.3031	5.27927	4.33402	6.13222	1.79819	5.216	3.49126	0.0168613	0.00520833	0.344339	1.13059	1.49873
MSMEG_1512	7.38099	9.61503	0.464063	8.71863	8.77251	8.44694	9.07105	0.624115	5.25606	3.3493	-0.791294	0	-0.633884	1.09795	0.520512
MSMEG_1513	5.72415	10.3852	0.942406	8.25997	8.30989	7.70127	8.85389	1.15262	5.25091	3.05842	-0.253696	0	-0.149495	1.0919	1.0049
MSMEG_1514	5.26605	9.79053	0.846726	7.51821	7.42249	6.93025	8.00635	1.0761	5.25123	3.40375	0.389678	0	-0.230074	1.0768	0.924321
MSMEG_1515	7.25914	11.9181	0.818644	9.15724	9.10864	8.6394	9.53006	0.890665	5.25361	4.85668	0.973118	0	-0.287196	1.10584	0.867199
MSMEG_1516	8.29874	14.1103	0.81245	10.0891	9.96681	9.57495	10.678	1.10306	5.25431	5.12682	0.657364	0	-0.315747	1.1282	0.838648
MSMEG_1517	4.39069	7.83026	0.850354	6.14369	6.08038	5.55451	6.89727	1.34277	5.24788	2.1556	-0.0503159	0	-0.240965	1.09132	0.91343
MSMEG_1518	2.54339	7.45257	0.994542	4.99747	5.14536	4.47157	5.57282	1.10126	5.23712	2.88142	-0.202423	0	-0.155506	1.15005	0.998889
MSMEG_1519	4.19332	11.0164	1.49061	8.14148	8.34154	7.19664	9.26809	2.07145	5.24004	2.52424	-0.49438	0	0.40025	1.09036	1.55465
MSMEG_1521	4.81858	12.6928	1.85125	10.2791	10.6351	9.83071	11.5706	1.73989	5.2394	4.6842	-1.44336	0	0.717744	1.13351	1.87214
MSMEG_1522	3.76105	11.5966	1.77243	9.10052	9.59431	8.83071	10.0689	1.23818	5.2361	4.52591	-1.44979	0	0.667713	1.10471	1.82211
MSMEG_1523	5.38839	11.7752	1.57434	9.72221	10.0935	9.34703	10.7348	1.38781	5.24312	4.34845	-1.44329	0	0.455737	1.1186	1.61013
MSMEG_1524	4.24791	12.3717	1.94217	9.93431	10.4221	9.64502	11.1307	1.48563	5.23584	4.55671	-1.50676	0	0.81813	1.12404	1.97252
MSMEG_1525	5.14622	13.6735	1.89494	10.956	11.41	10.6096	12.1069	1.49728	5.24096	4.30622	-1.43394	0	0.741027	1.15391	1.89542
MSMEG_1526	6.17673	11.0741	0.780896	7.82922	7.73171	7.27222	8.27637	1.00415	5.25267	4.41266	0.9473	0	-0.302888	1.08378	0.851507
MSMEG_1527	0.996518	6.67714	1.34697	4.21597	4.36043	3.59806	5.26693	1.66887	5.20065	2.55816	-0.528033	0	0.144972	1.20199	1.29937
MSMEG_1528	3.59138	8.0531	0.938201	6.32208	6.45818	6.02307	6.9519	0.928834	5.24579	3.72944	-1.04008	0	-0.146999	1.0852	1.0074
MSMEG_1529	2.41468	10.1712	1.15144	7.31426	7.45115	6.67255	8.1962	1.52365	5.24445	3.94704	-0.683861	0	0.0775036	1.07394	1.2319
MSMEG_1530	3.30745	13.0677	2.30171	7.34851	7.28965	5.50604	8.99122	3.48518	5.20879	2.61236	0.389201	0	1.22745	1.07426	2.38184
MSMEG_1531	2.15346	6.16196	0.892992	4.44101	4.54637	3.74436	5.06507	1.3207	5.23657	2.29954	-0.33808	0	-0.294857	1.18785	0.859538
MSMEG_1532	0	5.30868	1.18177	1.27475	0.855533	0.478743	1.69172	1.21298	4.89917	5.8587	1.77118	0.0364583	-0.0564325	1.2382	1.09796
MSMEG_1533	0	7.7961	1.33869	1.75623	1.50893	0.980522	2.22589	1.24537	5.01454	10.4755	2.3186	0.0260417	0.0956091	1.24308	1.25
MSMEG_1534	0.948684	8.49586	1.29621	3.60535	3.48218	2.80648	4.28709	1.48061	5.19665	5.61609	1.16708	0	0.0644491	1.23177	1.21884
MSMEG_1535	0	8.17202	1.34883	2.23459	2.03299	1.41161	2.62603	1.21442	5.1019	9.54102	2.108	0.00520833	0.105266	1.24356	1.25966
MSMEG_1536	1.06553	9.66043	1.37592	3.97458	3.86334	3.2593	4.4555	1.1962	5.20378	8.91202	1.82586	0	0.161624	1.2143	1.31602
MSMEG_1537	0	9.69568	1.55253	4.18329	4.29704	3.38888	4.82635	1.43748	5.18157	6.54492	0.680154	0.0208333	0.348741	1.20379	1.50314
MSMEG_1538	0	5.50419	0.888154	0.95317	0.792008	0.428752	1.213	0.784248	4.92545	11.7635	2.68323	0.0416667	-0.346073	1.23423	0.808322
MSMEG_1539	0	5.42638	1.09424	1.7211	1.46232	1.03302	2.1931	1.16008	5.06043	4.58008	1.16041	0.03125	-0.148591	1.24283	1.0058
MSMEG_1540	2.38608	11.4381	2.09136	7.09451	7.51198	5.79759	8.51989	2.7223	5.21023	2.63217	-0.434909	0	1.01745	1.07391	2.17184
MSMEG_1542	7.17139	10.1855	0.693736	8.57069	8.66969	7.99756	9.14307	1.14551	5.25422	1.95614	-0.0858303	0	-0.401999	1.09573	0.752396
MSMEG_1543	3.15162	13.672	1.96087	8.72229	8.58142	7.39964	10.0814	2.68177	5.23204	3.04406	0.193509	0	0.862866	1.098	2.01726
MSMEG_1544	1.71233	11.1844	1.91469	5.87678	5.66881	4.64232	6.95784	2.31551	5.20504	3.66925	0.604793	0	0.812411	1.10228	1.96681
MSMEG_1545	2.28963	9.14268	1.35456	4.66499	4.34287	3.64048	5.39219	1.75171	5.2177	3.83314	0.95264	0	0.182548	1.17201	1.33694
MSMEG_1546	2.52609	11.1436	1.72546	7.20415	7.10771	6.30119	8.32798	2.02679	5.22707	3.45521	-0.308318	0	0.65202	1.07344	1.80641
MSMEG_1547	2.66597	12.1767	1.70557	8.33254	8.47213	7.52332	9.27096	1.74764	5.2353	3.93279	-0.430692	0	0.612878	1.09269	1.76727
MSMEG_1548	3.40517	12.4536	1.77274	8.60255	8.71788	7.81322	9.76775	1.95453	5.23499	3.49891	-0.506626	0	0.676552	1.09619	1.83095
MSMEG_1549	1.4364	11.0941	1.79099	6.98563	6.93338	6.30711	7.93676	1.62965	5.22172	3.89452	-0.415695	0	0.715681	1.0753	1.87008
MSMEG_1550	0	6.45634	1.53741	2.81765	2.70922	1.71703	3.93707	2.22004	5.09311	2.45347	0.282011	0.0104167	0.29865	1.23876	1.45305
MSMEG_1552	3.72617	10.3324	1.37951	6.47227	6.53659	5.6288	7.25818	1.62938	5.23491	2.90936	0.297708	0	0.297723	1.08179	1.45212
MSMEG_1553	4.9193	10.9753	1.29267	7.61327	7.63567	6.74577	8.22861	1.48284	5.24345	3.15498	0.609598	0	0.213933	1.07874	1.36833
MSMEG_1554	1.56721	8.0853	1.3181	4.66461	4.32184	3.80933	5.57194	1.76261	5.21827	2.89889	0.521141	0	0.146061	1.17204	1.30046
MSMEG_1555	0	6.95371	1.63807	2.49606	1.89968	1.23801	3.4514	2.21339	5.05557	3.25483	0.997543	0.00520833	0.397333	1.24074	1.55173
MSMEG_1556	7.46946	14.4444	1.5791	12.052	12.4886	11.6054	13.1333	1.52798	5.24834	4.10263	-1.33625	0	0.389282	1.18982	1.54368
MSMEG_1557	4.09317	10.3065	1.42398	7.82288	8.06017	7.34971	8.74308	1.39337	5.2398	3.22939	-0.848264	0	0.340348	1.08363	1.49474
MSMEG_1558	5.56164	13.1227	1.58533	9.37579	8.97417	8.10046	10.617	2.51657	5.24332	2.11641	0.232426	0	0.474871	1.11046	1.62927
MSMEG_1559	6.58266	10.9329	0.902198	9.2932	9.35028	8.78065	9.95011	1.16946	5.2527	3.24019	-0.556373	0	-0.206465	1.10866	0.94793
MSMEG_1560	0.691773	5.73447	1.43567	3.25949	3.11184	2.13031	4.59233	2.46202	5.1539	1.90736	0.028112	0	0.194812	1.24086	1.34921
MSMEG_1561	3.60218	9.61719	0.99194	6.08558	6.02999	5.50248	6.73765	1.23517	5.24428	3.53073	0.271282	0	-0.101773	1.09371	1.05262
MSMEG_1562	1.36528	7.86811	1.28965	4.23529	4.24316	3.26966	5.17648	1.90682	5.21039	3.03294	0.25098	0	0.0887464	1.20091	1.24314
MSMEG_1563	2.02325	8.83545	1.38417	5.15902	4.7746	4.30922	6.02087	1.71165	5.22243	3.26764	0.627097	0	0.244456	1.13972	1.39885
MSMEG_1564	0	8.69805	1.54659	3.41602	3.54753	2.40819	4.15293	1.74474	5.15002	4.62984	0.643864	0.0104167	0.307822	1.23877	1.46222
MSMEG_1565	4.62107	7.58288	0.653932	5.89605	5.82214	5.43373	6.35828	0.924553	5.25143	2.63794	0.393789	0	-0.447547	1.10148	0.706848
MSMEG_1566	2.90091	9.74548	1.06014	5.93888	6.07905	5.37802	6.56742	1.1894	5.24098	4.20665	-0.295285	0	-0.0395745	1.09971	1.11482
MSMEG_1567	3.5174	7.75493	0.792333	6.43822	6.54133	5.96236	7.07076	1.1084	5.24967	3.18222	-0.719385	0	-0.290119	1.08245	0.864277
MSMEG_1568	5.06173	9.35823	0.614352	7.90293	8.02794	7.50946	8.35968	0.850216	5.2544	4.70711	-0.893324	0	-0.471176	1.08553	0.683219
MSMEG_1570	3.80716	7.51711	0.783211	5.78433	5.79777	5.21379	6.23463	1.02084	5.24827	2.71043	-0.0557067	0	-0.322981	1.10619	0.831414
MSMEG_1571	0	7.14674	1.14728	1.66041	1.53939	0.923359	2.03987	1.11651	5.06256	12.6106	2.60449	0.015625	-0.095068	1.24235	1.05933
MSMEG_1572	0.838169	8.5542	1.10875	3.70329	3.63578	3.15981	4.18344	1.02363	5.21624	9.47299	1.71501	0	-0.118224	1.22697	1.03617
MSMEG_1573	3.56517	8.11624	0.877605	5.62934	5.70768	5.1662	6.18933	1.02314	5.24509	2.92161	-0.253468	0	-0.235539	1.11314	0.918856
MSMEG_1574	4.63299	8.26999	0.722471	6.72573	6.72654	6.22987	7.24193	1.01206	5.25165	2.82553	-0.332859	0	-0.355751	1.07822	0.798644
MSMEG_1575	4.2558	8.17497	0.67142	6.4572	6.57261	6.0305	6.96108	0.930572	5.25196	3.32174	-0.663201	0	-0.410655	1.08208	0.74374
MSMEG_1576	3.26134	7.32599	0.761818	5.8261	5.96598	5.37323	6.38292	1.00969	5.24863	3.33148	-0.719443	0	-0.342591	1.10441	0.811805
MSMEG_1577	2.63899	6.22881	0.702723	4.83682	4.96143	4.35625	5.36488	1.00862	5.24663	2.79772	-0.477723	0	-0.457767	1.16049	0.696628
MSMEG_1578	1.43448	6.99088	0.993278	5.02794	5.23224	4.52452	5.69669	1.17217	5.23584	4.31851	-1.1049	0	-0.154814	1.14809	0.999581
MSMEG_1579	2.38144	6.20032	0.90962	4.51078	4.68055	3.73506	5.26775	1.53269	5.23664	2.02271	-0.236478	0	-0.273191	1.18281	0.881204
MSMEG_1580	2.97595	6.67834	0.725419	5.22139	5.34041	4.65588	5.80757	1.15169	5.24763	2.50514	-0.40599	0	-0.410328	1.13575	0.744067
MSMEG_1581	2.4121	7.5927	0.976788	4.89436	5.10159	4.09851	5.57081	1.4723	5.23701	2.46463	-0.240743	0	-0.179934	1.15672	0.974462
MSMEG_1582	3.22619	13.4559	1.99054	9.65981	9.89316	8.37831	11.093	2.71466	5.23496	3.11737	-0.556513	0	0.873479	1.11706	2.02787
MSMEG_1583	3.63447	12.4272	1.70967	9.7373	10.1371	9.21318	10.9834	1.77026	5.24062	4.12347	-1.21572	0	0.590689	1.11898	1.74508
MSMEG_1584	0	5.75529	1.11768	1.99717	1.91575	1.12106	2.55978	1.43872	5.09773	4.28652	0.852206	0.015625	-0.126405	1.24408	1.02799
MSMEG_1585	0.42214	5.40285	0.995111	2.14877	2.02818	1.58701	2.46325	0.876244	5.15992	5.23086	1.36337	0	-0.248838	1.24395	0.905557
MSMEG_1586	0.267101	6.64639	1.42106	2.30629	2.03845	1.34407	2.73989	1.39581	5.08556	4.17149	1.25062	0	0.178017	1.24304	1.33241
MSMEG_1587	0	7.45519	1.39189	1.65257	1.36404	0.764096	2.04878	1.28468	4.95943	8.75892	2.11466	0.0364583	0.149609	1.24228	1.304
MSMEG_1588	0	5.50756	1.03001	0.947457	0.685615	0.303384	1.17226	0.868876	4.80332	10.2688	2.48042	0.0572917	-0.204154	1.23416	0.950241
MSMEG_1589	0	7.2707	1.28568	1.62571	1.301	0.838929	2.00124	1.16231	5.00436	9.49575	2.24504	0.015625	0.0436356	1.24204	1.19803
MSMEG_1592	5.22	8.903	0.832579	6.89031	6.71716	6.28673	7.54054	1.25381	5.25033	2.49579	0.49025	0	-0.243866	1.07644	0.910529
MSMEG_1593	0	5.37129	1.26385	1.62354	1.40304	0.556752	2.72208	2.16533	4.92364	2.6186	0.574042	0.09375	0.0218235	1.24203	1.17622
MSMEG_1594	4.82688	7.92149	0.587581	6.66765	6.69159	6.23759	7.10529	0.8677	5.25361	2.47475	-0.108343	0	-0.491309	1.07889	0.663086
MSMEG_1595	0	6.01942	1.31071	2.11795	1.95089	1.09217	3.06914	1.97697	5.05606	3.06325	0.594463	0.015625	0.0666777	1.24403	1.22107
MSMEG_1596	1.0931	7.83994	1.04335	3.83112	3.66898	3.20165	4.31925	1.1176	5.22164	4.37232	0.821178	0	-0.177642	1.22099	0.976753
MSMEG_1597	1.89397	13.0521	2.31528	6.11664	5.79309	4.62725	7.28023	2.65298	5.18813	3.55251	0.760962	0	1.22285	1.09244	2.37724
MSMEG_1598	2.52723	9.65471	1.54742	5.80278	5.94037	4.84473	6.38947	1.54474	5.22177	3.18308	0.301094	0	0.442015	1.1054	1.59641
MSMEG_1599	6.84409	12.6086	1.04756	9.16756	9.16759	8.45417	9.85699	1.40282	5.25104	3.22419	0.329879	0	-0.0584862	1.10605	1.09591
MSMEG_1600	6.01705	9.59001	0.750957	7.44246	7.34768	6.87765	7.9411	1.06346	5.25249	2.57979	0.439765	0	-0.324536	1.07549	0.829859
MSMEG_1601	7.2316	11.9511	0.75133	10.1466	10.047	9.57873	10.6902	1.11143	5.25474	4.00238	-0.229821	0	-0.378449	1.12978	0.775946
MSMEG_1602	7.34181	10.9083	0.558714	9.52947	9.51248	9.2239	9.843	0.619106	5.25577	4.15493	-0.292039	0	-0.555237	1.11395	0.599158
MSMEG_1603	8.04538	10.7611	0.497132	9.74124	9.77741	9.37194	10.0856	0.713619	5.25619	3.14911	-0.449232	0	-0.621944	1.11908	0.532451
MSMEG_1604	5.3459	9.79205	0.924228	7.75733	7.77516	7.07509	8.40874	1.33366	5.25035	2.61339	-0.139675	0	-0.157831	1.08206	0.996564
MSMEG_1605	4.42878	12.0661	1.84551	8.83559	9.29631	7.92041	10.0792	2.15882	5.23402	2.77414	-0.80636	0	0.745648	1.09986	1.90004
MSMEG_1606	1.44052	7.4171	1.2216	3.99239	3.99436	3.11552	4.7971	1.68158	5.21035	2.55779	0.257375	0	0.00814702	1.21345	1.16254
MSMEG_1607	0.43789	6.229	1.06007	2.89937	2.80034	2.21501	3.55522	1.34021	5.18851	3.51273	0.346227	0	-0.17922	1.23929	0.975175
MSMEG_1608	5.19686	8.97446	0.842445	7.06809	7.02253	6.40829	7.73073	1.32244	5.25044	2.27351	0.162325	0	-0.231744	1.07419	0.922651
MSMEG_1609	2.78389	6.4077	0.855019	4.49112	4.50927	3.81056	5.16291	1.35235	5.23928	2.11573	0.042673	0	-0.329207	1.18423	0.825188
MSMEG_1610	6.42273	9.14546	0.522834	8.04279	8.14375	7.79874	8.39313	0.594386	5.25535	3.72203	-0.911436	0	-0.565744	1.08858	0.588651
MSMEG_1611	3.24791	7.64738	0.797832	6.28272	6.44155	5.97759	6.80166	0.824066	5.24895	4.43647	-1.18021	0	-0.288501	1.08633	0.865894
MSMEG_1612	1.3391	6.68253	1.08361	3.48854	3.43755	2.73626	4.07841	1.34215	5.21016	3.22507	0.565767	0	-0.153144	1.23676	1.00125
MSMEG_1613	1.36216	8.1942	1.32991	4.13483	4.02998	3.23914	4.72621	1.48706	5.20778	4.18584	0.860392	0	0.123536	1.20637	1.27793
MSMEG_1614	0.655723	6.87741	1.1827	2.98526	2.83468	2.33759	3.40017	1.06258	5.18416	5.30569	1.22178	0	-0.0572745	1.23997	1.09712
MSMEG_1615	2.70043	10.0166	1.25057	5.50395	5.41263	4.80254	5.96683	1.1643	5.23302	5.69528	1.13237	0	0.131262	1.1193	1.28566
MSMEG_1616	4.32701	8.43388	0.77251	6.47492	6.42015	5.97934	7.02538	1.04604	5.25035	2.87451	-0.0531477	0	-0.30923	1.08174	0.845165
MSMEG_1617	4.65999	8.92913	0.74444	6.73127	6.80193	6.24562	7.27145	1.02584	5.25132	3.33635	-0.232425	0	-0.333722	1.07816	0.820674
MSMEG_1618	5.79649	11.485	0.923023	8.91856	9.13636	8.39329	9.56627	1.17297	5.25202	3.51783	-0.632535	0	-0.178283	1.10131	0.976113
MSMEG_1620	0.530913	9.94106	1.53863	4.47471	4.21573	3.69686	5.00527	1.3084	5.19774	4.38556	0.651163	0	0.353219	1.18541	1.50761
MSMEG_1621	2.36913	8.1433	0.806767	5.30341	5.37072	4.8638	5.77722	0.913418	5.24563	4.52918	-0.224698	0	-0.3238	1.13057	0.830595
MSMEG_1622	1.04821	9.04688	1.29049	4.10329	3.88812	3.43602	4.49821	1.06219	5.21064	5.53374	1.1517	0	0.0825009	1.20799	1.2369
MSMEG_1623	2.1532	8.79971	1.17171	4.49273	4.18574	3.77424	4.93933	1.16509	5.22645	6.07482	1.51515	0	-0.0123982	1.18411	1.142
MSMEG_1624	0	7.01924	1.8056	2.8167	2.31082	1.54902	3.78833	2.23931	5.05561	2.64068	0.778936	0.0104167	0.566845	1.23876	1.72124
MSMEG_1625	0.253411	8.07176	1.71771	3.52449	3.074	2.29927	4.52095	2.22168	5.14375	3.06954	0.850164	0	0.482249	1.23546	1.63664
MSMEG_1626	1.98025	7.05238	0.920668	3.77045	3.63601	3.2406	4.06346	0.822855	5.22963	5.33907	1.23319	0	-0.303139	1.22381	0.851257
MSMEG_1628	0	6.27062	1.65445	2.09369	1.39303	0.831146	2.98648	2.15533	4.97356	2.96799	1.05965	0.00520833	0.410375	1.24408	1.56477
MSMEG_1629	3.80167	10.2311	1.19249	7.39041	7.48703	6.77344	8.14117	1.36773	5.24399	3.55124	-0.465239	0	0.117736	1.07475	1.27213
MSMEG_1630	0	7.29522	1.35908	2.15401	1.94467	1.21819	2.93799	1.7198	5.06335	6.4071	1.37011	0.0364583	0.115149	1.24393	1.26954
MSMEG_1631	4.32324	9.54524	1.01336	7.16634	7.17191	6.44281	7.80928	1.36647	5.24746	3.03474	0.0405399	0	-0.0601297	1.07349	1.09427
MSMEG_1632	4.5402	9.75601	1.11958	7.6468	7.87688	6.83817	8.46931	1.63115	5.24648	2.50907	-0.465203	0	0.0401035	1.07948	1.1945
MSMEG_1633	3.03354	9.99405	1.13439	5.03304	4.72475	4.41987	5.4952	1.07534	5.23443	6.88819	1.7175	0	-0.0133739	1.14776	1.14102
MSMEG_1634	2.98918	9.04369	1.45513	6.97702	7.2061	6.08515	8.14799	2.06284	5.23424	2.64883	-0.71985	0	0.379718	1.07542	1.53411
MSMEG_1635	6.41081	11.0028	0.866507	9.06194	9.10983	8.63147	9.70991	1.07845	5.25281	3.6739	-0.740827	0	-0.237457	1.10396	0.916939
MSMEG_1636	1.91405	8.33262	1.4421	5.33757	5.25437	4.33634	6.42321	2.08687	5.21977	2.40046	-0.0591284	0	0.313593	1.1285	1.46799
MSMEG_1637	5.89401	10.5826	0.830685	7.88309	7.78849	7.36859	8.38769	1.0191	5.25204	3.55047	0.516411	0	-0.254379	1.08506	0.900016
MSMEG_1638	3	7.72959	0.979098	5.45306	5.32409	4.8572	5.90848	1.05128	5.24168	2.8981	0.482852	0	-0.142882	1.12198	1.01151
MSMEG_1639	3.03948	7.68761	1.07549	5.54765	5.62142	4.83868	6.37116	1.53249	5.23826	2.27657	-0.203856	0	-0.0416028	1.11709	1.11279
MSMEG_1640	4.73437	8.92717	0.786759	6.83129	6.96347	6.36246	7.30557	0.943107	5.25076	3.15435	-0.345044	0	-0.290328	1.07709	0.864068
MSMEG_1641	2.50811	7.17946	0.900761	5.88135	6.04805	5.47555	6.51371	1.03815	5.24497	3.92321	-1.04858	0	-0.201329	1.10209	0.953066
MSMEG_1642	8.3777	11.8636	0.760632	10.5382	10.6855	10.4468	11.0039	0.557051	5.25482	3.98032	-1.26559	0	-0.380436	1.14107	0.773959
MSMEG_1643	3.2041	8.1717	1.10869	6.54186	6.87118	5.90571	7.28769	1.38198	5.24206	3.36381	-1.06571	0	0.0280865	1.0806	1.18248
MSMEG_1644	2.88554	7.48221	0.816146	4.44897	4.30488	3.93447	4.88556	0.951088	5.24146	4.82717	1.04415	0	-0.371134	1.18728	0.783261
MSMEG_1645	2.09719	6.01292	0.748997	3.78702	3.83569	3.12742	4.31041	1.18298	5.23827	3.21661	0.460831	0	-0.474038	1.22303	0.680357
MSMEG_1646	0.866254	8.75601	1.87678	4.73743	5.31929	2.9568	6.02799	3.0712	5.17003	2.03638	-0.348634	0	0.709682	1.1671	1.86408
MSMEG_1647	5.72728	8.90658	0.585667	7.37635	7.4005	7.05612	7.72594	0.669825	5.25433	3.05205	-0.253886	0	-0.488909	1.07458	0.665487
MSMEG_1648	0.601539	6.34018	1.02516	2.97219	2.87535	2.32806	3.52568	1.19762	5.1997	4.48402	0.813515	0	-0.214711	1.23987	0.939684
MSMEG_1649	2.20111	8.19044	0.941414	4.78936	4.74342	4.2222	5.29519	1.073	5.23873	5.25629	0.798715	0	-0.222215	1.16363	0.93218
MSMEG_1650	2.84054	8.28484	1.32933	6.23605	6.35847	5.51123	7.24188	1.73065	5.2333	2.76389	-0.616474	0	0.2415	1.08783	1.3959
MSMEG_1651	3.8875	10.1473	1.36009	7.78483	8.08874	7.05804	8.75879	1.70076	5.2413	3.20265	-0.795174	0	0.277374	1.08272	1.43177
MSMEG_1652	5.08349	11.0577	1.33478	8.86814	9.05441	8.07135	9.895	1.82365	5.24564	3.10192	-0.762441	0	0.234363	1.10042	1.38876
MSMEG_1654	7.62572	11.7693	0.905455	10.2139	10.316	9.89589	10.8768	0.98091	5.25347	3.38896	-0.814825	0	-0.226206	1.13166	0.928189
MSMEG_1655	2.21684	6.91516	0.803944	4.66636	4.62084	4.11788	5.03801	0.92013	5.24285	3.65672	0.459762	0	-0.367976	1.17192	0.78642
MSMEG_1656	3.12386	9.32224	1.07405	5.85786	5.98012	5.39964	6.39224	0.992603	5.24062	4.57789	0.246609	0	-0.02902	1.10307	1.12538
MSMEG_1657	5.64251	9.48782	0.811259	7.59753	7.66017	7.17234	8.18204	1.0097	5.25171	2.84492	-0.38551	0	-0.267139	1.0784	0.887256
MSMEG_1658	5.78106	10.8623	0.973056	8.11709	8.04867	7.42685	8.65826	1.2314	5.25044	3.03841	0.508055	0	-0.116903	1.08996	1.03749
MSMEG_1659	2.7749	8.94542	1.39933	6.01378	6.25151	5.01651	6.91951	1.90299	5.22934	2.37572	-0.26705	0	0.302688	1.09665	1.45708
MSMEG_1660	3.33918	7.09032	0.895717	5.33326	5.39592	4.73949	5.98941	1.24991	5.24311	2.30091	-0.241106	0	-0.233044	1.12876	0.921351
MSMEG_1661	4.8583	10.5141	1.02533	7.97466	8.10882	7.73094	8.43957	0.708629	5.24887	4.51041	-0.804765	0	-0.0618216	1.08715	1.09257
MSMEG_1662	4.87934	9.97514	0.896306	6.94308	7.08975	6.37793	7.56367	1.18574	5.2491	3.33926	-0.0764835	0	-0.179529	1.07584	0.974866
MSMEG_1663	3.45675	8.84124	1.14279	6.1966	6.21133	5.34835	7.0366	1.68825	5.24021	2.31226	-0.122445	0	0.0535592	1.08923	1.20795
MSMEG_1664	0	6.08721	1.39478	1.59943	1.25913	0.491526	2.32685	1.83532	4.88322	3.78314	1.13819	0.0729167	0.152972	1.2418	1.30737
MSMEG_1665	4.73272	9.20715	0.778166	6.99445	6.91192	6.5126	7.59382	1.08122	5.25127	2.93993	-0.135697	0	-0.297024	1.07519	0.857372
MSMEG_1666	4.67551	8.35333	0.642119	6.62387	6.68696	6.25958	7.0404	0.780815	5.25276	3.32013	-0.256333	0	-0.437318	1.07944	0.717077
MSMEG_1667	1.54576	6.73627	0.951531	3.78533	3.71502	3.0374	4.47096	1.43356	5.22595	2.9066	0.302842	0	-0.271582	1.22311	0.882813
MSMEG_1668	1.20375	6.10319	0.804515	3.5701	3.44649	3.12504	4.02024	0.895199	5.23241	3.67562	0.499996	0	-0.428996	1.23351	0.7254
MSMEG_1669	5.58608	10.5731	1.00458	8.1393	8.22178	7.65328	8.92682	1.27354	5.24974	2.73351	-0.400495	0	-0.0857494	1.09033	1.06865
MSMEG_1670	6.94628	12.058	0.956903	9.71947	9.81225	9.00407	10.5115	1.50738	5.25262	2.54443	-0.183258	0	-0.16163	1.11853	0.992765
MSMEG_1671	3.94215	9.41096	1.09975	6.64679	6.54976	5.90539	7.51015	1.60476	5.24368	2.48701	-0.0433166	0	0.0206003	1.07915	1.175
MSMEG_1672	4.91143	9.88895	1.13134	7.81907	7.91549	7.07701	8.73505	1.65804	5.24684	2.41526	-0.300312	0	0.0477952	1.08354	1.20219
MSMEG_1673	0.645695	5.51169	1.10861	2.98803	2.94029	2.24885	3.5615	1.31266	5.18712	2.55489	0.28238	0	-0.131382	1.24	1.02301
MSMEG_1675	4.16308	7.41385	0.644198	6.0213	5.9457	5.54019	6.50008	0.959891	5.25177	2.65513	-0.0298597	0	-0.452142	1.09634	0.702254
MSMEG_1676	4.40216	9.45441	0.933726	6.36803	6.13839	5.67343	7.04579	1.37236	5.247	2.81698	0.562456	0	-0.150287	1.08401	1.00411
MSMEG_1677	2.99979	12.0343	1.85978	8.61919	8.72799	7.68256	9.84614	2.16358	5.23273	3.25883	-0.503691	0	0.763344	1.09643	1.91774
MSMEG_1678	3.75812	8.97394	1.16437	5.888	5.55426	5.12579	6.41933	1.29354	5.23899	3.78983	1.04735	0	0.0625593	1.10181	1.21695
MSMEG_1679	2.39814	11.7916	1.85852	7.61497	7.56748	6.65043	8.84796	2.19752	5.22539	3.34929	-0.47063	0	0.779741	1.07877	1.93414
MSMEG_1680	2.76299	12.3422	1.86189	7.93964	7.94065	6.91179	9.40846	2.49667	5.22839	3.03361	-0.368168	0	0.775516	1.08637	1.92991
MSMEG_1681	2.53118	12.0929	1.9496	7.77093	7.72242	6.87024	9.26627	2.39603	5.22355	3.05452	-0.495503	0	0.867211	1.08239	2.02161
MSMEG_1682	3.49148	12.6743	1.87825	8.59074	8.65496	7.37229	9.896	2.52372	5.23264	2.77133	-0.260012	0	0.782232	1.09602	1.93663
MSMEG_1683	4.82307	14.4926	1.76047	9.47082	9.26085	8.33368	10.8926	2.55896	5.24012	2.9518	0.109813	0	0.64787	1.1126	1.80227
MSMEG_1684	5.02731	11.1096	1.1794	9.80895	10.1963	9.3378	10.5852	1.24744	5.24961	6.81305	-1.85325	0	0.0586136	1.12079	1.21301
MSMEG_1686	1.22594	9.23109	1.29619	3.76619	3.7561	2.93686	4.18535	1.24849	5.20331	7.42345	1.53048	0	0.0721807	1.22401	1.22658
MSMEG_1687	0	4.99566	0.85014	1.03154	0.891406	0.433587	1.38598	0.952397	4.95113	8.0761	1.85173	0.0520833	-0.385036	1.23518	0.769359
MSMEG_1688	0	5.93629	0.992084	1.20735	1.05497	0.598073	1.49133	0.893256	4.98389	12.337	2.62068	0.046875	-0.245281	1.23737	0.909114
MSMEG_1689	0	6.21972	1.04511	1.11921	0.952133	0.491558	1.41945	0.927893	4.9282	14.1596	2.96349	0.046875	-0.191153	1.23626	0.963242
MSMEG_1690	0	6.51966	1.07477	1.26585	1.12371	0.64937	1.59286	0.943488	4.98613	14.6565	3.03517	0.0364583	-0.163321	1.23809	0.991074
MSMEG_1691	0	7.9202	1.31405	1.39314	1.16118	0.676326	1.58168	0.905353	4.95633	15.9027	3.33523	0.0104167	0.0744307	1.23962	1.22883
MSMEG_1692	1.86686	7.21169	1.04003	3.88184	3.58116	3.14847	4.64004	1.49156	5.22297	3.54885	0.759975	0	-0.178608	1.21864	0.975787
MSMEG_1693	0.811723	8.245	1.26592	3.50376	3.4076	2.58179	4.28684	1.70504	5.19617	5.68955	1.17385	0	0.0296845	1.23624	1.18408
MSMEG_1694	4.62718	8.04114	0.723535	6.3452	6.41219	5.73448	6.9126	1.17812	5.25097	2.20495	-0.103053	0	-0.361051	1.08459	0.793344
MSMEG_1695	3.99491	10.67	1.36395	6.72773	6.64181	5.87059	7.59128	1.72069	5.23714	3.09574	0.35979	0	0.28575	1.0782	1.44015
MSMEG_1696	0	8.11503	1.56172	2.70139	2.57673	1.65852	3.16732	1.5088	5.10094	5.13035	1.28652	0.00520833	0.323188	1.23853	1.47758
MSMEG_1697	0	7.47115	1.385	2.12021	1.84326	1.30555	2.37352	1.06796	5.07036	6.1704	1.66386	0.015625	0.140971	1.24403	1.29537
MSMEG_1698	2.04681	9.37536	1.42506	4.9043	4.73084	3.91145	5.39796	1.4865	5.21701	3.50737	0.795036	0	0.268989	1.15607	1.42338
MSMEG_1699	0	6.93199	1.11546	1.55696	1.39919	0.891709	1.84654	0.95483	5.06045	13.5171	2.83597	0.00520833	-0.125934	1.24139	1.02846
MSMEG_1700	0.627229	6.98662	1.02631	3.15518	3.14561	2.59521	3.62741	1.0322	5.20478	5.62504	0.757124	0	-0.214663	1.24097	0.939733
MSMEG_1701	1.74528	7.33458	0.984611	4.93517	5.07592	4.35623	5.58603	1.2298	5.23648	3.70981	-0.462223	0	-0.169458	1.15407	0.984937
MSMEG_1702	4.03242	8.15595	0.685227	6.93502	7.06367	6.65715	7.37133	0.714174	5.25239	5.52742	-1.24812	0	-0.390704	1.07593	0.763691
MSMEG_1703	4.85342	8.33411	0.561211	7.1012	7.11765	6.77415	7.49353	0.719381	5.25432	4.30666	-0.622068	0	-0.512642	1.07385	0.641753
MSMEG_1704	0.573629	9.52499	1.59182	3.83652	3.50138	2.91017	4.34679	1.43662	5.17611	4.97004	1.13451	0	0.371085	1.22074	1.52548
MSMEG_1705	1.60437	10.3571	1.68313	4.95851	4.44244	3.861	5.57741	1.71641	5.20445	3.81612	1.14295	0	0.530573	1.15256	1.68497
MSMEG_1706	0.766656	9.0852	1.60659	4.25387	3.7921	3.28983	4.61501	1.32519	5.19203	3.72046	1.14956	0	0.406753	1.19984	1.56115
MSMEG_1707	1.81415	6.75296	0.813667	3.63886	3.46104	3.12831	3.89136	0.763046	5.23409	4.62835	1.20412	0	-0.416429	1.2301	0.737966
MSMEG_1708	3.57343	8.56322	0.724633	4.93238	4.76749	4.4883	5.22256	0.734251	5.24736	6.86024	1.52984	0	-0.429618	1.15425	0.724778
MSMEG_1711	0	13.7372	3.51184	4.07847	2.96151	1.25514	6.27832	5.02318	4.87426	2.52508	0.784581	0.078125	2.30259	1.20925	3.45698
MSMEG_1712	0	11.7489	3.01441	3.93499	3.3351	1.5386	5.5365	3.9979	4.94426	2.72539	0.723033	0.0833333	1.79825	1.21616	2.95265
MSMEG_1713	0	9.21637	2.46706	2.81292	1.91783	1.01528	3.79254	2.77726	4.90671	3.28288	1.17269	0.0260417	1.22832	1.23874	2.38272
MSMEG_1715	0	10.0029	2.35808	2.5625	1.63063	0.956694	3.39836	2.44166	4.88343	3.64857	1.30626	0.0260417	1.11845	1.23963	2.27284
MSMEG_1716	1.28421	6.62542	1.0731	3.69185	3.51772	2.99673	4.22034	1.22361	5.21623	2.97984	0.583878	0	-0.154422	1.22752	0.999973
MSMEG_1717	0	6.87687	1.30351	3.10199	3.24952	2.23924	4.05863	1.81939	5.15826	3.10346	0.0208947	0.0104167	0.0627425	1.24077	1.21714
MSMEG_1718	0.625719	6.84071	1.02897	3.10366	3.03127	2.46044	3.5653	1.10486	5.2049	5.57796	1.06866	0	-0.211813	1.24078	0.942583
MSMEG_1719	0	6.44062	1.4601	2.575	2.33144	1.555	3.75329	2.19829	5.08332	2.45909	0.396894	0.0260417	0.220655	1.23945	1.37505
MSMEG_1721	0	4.41132	1.1385	1.42168	1.06193	0.535622	1.94129	1.40567	4.93522	2.71526	0.856919	0.0625	-0.101441	1.23995	1.05295
MSMEG_1722	2.73697	7.18586	0.82569	4.97593	4.88493	4.35277	5.60661	1.25384	5.24385	2.60164	0.28546	0	-0.325745	1.15143	0.82865
MSMEG_1723	0.779843	5.61003	0.85664	3.16967	3.15362	2.57243	3.78805	1.21562	5.22	3.41214	0.135358	0	-0.384363	1.241	0.770032
MSMEG_1724	0.977416	5.56645	0.901473	3.54558	3.56268	2.78301	4.27676	1.49375	5.22427	2.28244	-0.0594266	0	-0.333132	1.23461	0.821263
MSMEG_1726	0	6.02704	1.24438	3.17556	3.14103	2.51177	3.95147	1.4397	5.16871	3.01801	-0.144605	0.015625	0.00336466	1.24101	1.15776
MSMEG_1729	0	6.81688	1.17867	3.75604	3.79485	3.11709	4.41734	1.30026	5.20045	3.89876	-0.33783	0.0104167	-0.045815	1.22448	1.10858
MSMEG_1730	0	3.91158	0.805597	1.02869	0.865555	0.489629	1.30012	0.81049	4.97049	4.97257	1.41291	0.0625	-0.429544	1.23514	0.724852
MSMEG_1732	0	6.74357	1.46385	2.43541	2.30379	1.31706	3.36514	2.04808	5.06581	3.05088	0.568767	0.0208333	0.222216	1.24163	1.37661
MSMEG_1733	0	8.45104	1.67575	3.94188	3.81867	2.87012	5.06832	2.1982	5.16333	2.90425	0.368482	0.00520833	0.459914	1.21584	1.61431
MSMEG_1734	4.70866	7.95715	0.680974	6.34719	6.40604	5.91139	6.91768	1.00629	5.25167	2.59241	-0.334477	0	-0.403561	1.08453	0.750834
MSMEG_1735	4.24621	7.94411	0.705864	6.85247	6.99436	6.55732	7.28813	0.730808	5.25196	4.37313	-1.17816	0	-0.370995	1.07686	0.7834
MSMEG_1736	8.24148	13.0387	0.963229	10.3363	10.326	9.44439	11.142	1.69764	5.25318	2.27545	0.131055	0	-0.171918	1.13515	0.982478
MSMEG_1737	2.24425	8.89949	1.30551	5.58242	5.52807	4.51135	6.71561	2.20426	5.22981	2.36662	0.0660757	0	0.190125	1.11538	1.34452
MSMEG_1738	7.05553	15.8391	1.24522	12.4058	12.3442	11.7793	13.2292	1.44989	5.25231	5.76618	-0.667486	0	0.0436574	1.20157	1.19805
MSMEG_1739	1.93859	7.26533	1.11343	4.92028	4.9832	4.22883	5.68494	1.45612	5.23111	2.58626	-0.144787	0	-0.0416054	1.15504	1.11279
MSMEG_1740	2.51522	9.18779	1.25103	6.44473	6.37584	5.54489	7.5753	2.03042	5.23801	2.77021	-0.277207	0	0.168712	1.08232	1.32311
MSMEG_1741	1.35887	10.0669	1.39994	6.96191	6.91543	6.02086	7.82814	1.80728	5.2361	4.00091	-0.341626	0	0.324339	1.07561	1.47873
MSMEG_1742	2.88094	12.1149	1.99727	8.40796	8.81806	6.725	9.95629	3.23129	5.22764	2.46994	-0.436255	0	0.903683	1.09359	2.05808
MSMEG_1743	4.65997	13.443	2.00031	9.54434	9.58163	8.04115	11.0843	3.04312	5.23497	2.24337	-0.181364	0	0.886013	1.1143	2.04041
MSMEG_1744	1.4968	9.28833	1.45828	4.66781	4.41272	3.73611	5.30762	1.57152	5.21032	3.63232	0.760322	0	0.286457	1.17182	1.44085
MSMEG_1745	0.915609	6.18195	0.926668	3.9838	3.8878	3.38896	4.67319	1.28423	5.22946	3.02955	-0.0716576	0	-0.287192	1.21386	0.867203
MSMEG_1746	0	6.86896	1.32272	2.49875	2.41191	1.65004	3.08248	1.43244	5.11844	4.4302	0.948222	0.00520833	0.0820265	1.2407	1.23642
MSMEG_1747	0	7.0796	1.37153	2.94887	2.942	1.96587	3.6707	1.70484	5.14473	3.4489	0.490757	0.00520833	0.131852	1.23968	1.28625
MSMEG_1748	0	5.68901	1.22135	1.63531	1.43704	0.756917	2.21307	1.45615	4.97549	4.07562	1.07029	0.0729167	-0.0207814	1.24213	1.13361
MSMEG_1749	1.86788	9.4522	1.69413	5.59255	5.59195	4.39609	6.97263	2.57654	5.21044	2.30692	0.0677437	0	0.579237	1.11489	1.73363
MSMEG_1751	2.16841	10.3036	1.47225	5.63158	5.49009	4.47856	6.50467	2.02611	5.22414	3.51625	0.612234	0	0.359208	1.11304	1.5136
MSMEG_1753	2.39046	7.04377	0.990944	5.16073	5.31618	4.70475	5.71361	1.00886	5.238	3.03868	-0.62461	0	-0.148667	1.13961	1.00573
MSMEG_1754	1.72712	9.86023	1.4424	5.44592	5.38588	4.69203	6.16046	1.46843	5.22236	4.24615	0.451671	0	0.320033	1.12236	1.47443
MSMEG_1755	1.7821	10.3119	1.78034	5.7545	5.43656	4.43901	6.89012	2.45111	5.21009	2.82769	0.45781	0	0.672852	1.10749	1.82725
MSMEG_1756	2.79654	9.68952	1.37119	6.00402	5.82926	4.84083	7.18332	2.34249	5.23185	2.30024	0.398159	0	0.274145	1.09705	1.42854
MSMEG_1757	5.02559	11.4907	1.43645	8.31139	8.29421	7.26133	9.55553	2.2942	5.24244	2.20138	-0.0378529	0	0.34399	1.09246	1.49839
MSMEG_1758	0.399514	11.3978	2.55058	6.25574	6.62948	5.26905	7.68047	2.41142	5.15638	2.91959	-0.526624	0	1.4634	1.08718	2.6178
MSMEG_1759	0	9.34273	2.33866	3.24587	2.61063	1.6293	4.53345	2.90414	4.99562	3.02361	0.86066	0.0364583	1.09774	1.24092	2.25213
MSMEG_1760	4.33172	10.882	1.31141	7.80123	7.97567	6.75427	8.71456	1.9603	5.24317	2.46307	-0.122579	0	0.228293	1.08311	1.38269
MSMEG_1761	0.420564	9.65318	1.95895	4.62685	4.63502	3.23903	5.94319	2.70415	5.16095	2.33735	0.0289055	0	0.784313	1.17464	1.93871
MSMEG_1762	2.97464	10.7604	1.83653	6.39493	6.29123	4.76769	7.70418	2.93648	5.21677	2.19502	0.369033	0	0.753151	1.08338	1.90755
MSMEG_1763	2.92968	9.22564	1.2525	5.43775	5.1758	4.56661	5.89769	1.33108	5.23278	4.1724	1.20812	0	0.129695	1.12281	1.28409
MSMEG_1764	3.02234	11.408	2.14814	7.35691	6.81038	5.65465	9.28574	3.63109	5.21469	1.77901	0.171881	0	1.07379	1.07435	2.22819
MSMEG_1765	0.237712	7.0543	1.544	2.28895	1.73944	1.15272	2.91978	1.76706	5.05049	3.29062	1.0952	0	0.30081	1.24318	1.45521
MSMEG_1766	0.511538	9.71793	2.27347	5.98843	6.42594	4.81099	7.52223	2.71125	5.17175	2.62062	-0.67814	0	1.17578	1.09768	2.33018
MSMEG_1767	0	12.9234	2.5874	7.82086	8.61095	6.69425	9.64736	2.95311	5.19076	3.18285	-0.972788	0.00520833	1.50381	1.08358	2.65821
MSMEG_1768	0.9698	12.6508	2.4309	7.52446	8.36738	6.31077	9.37847	3.0677	5.19708	2.77936	-0.784275	0	1.35398	1.07692	2.50838
MSMEG_1769	0.61191	12.079	2.30207	6.90325	7.45153	5.03269	8.42238	3.38969	5.19677	2.29345	-0.336878	0	1.22577	1.0763	2.38016
MSMEG_1770	1.81978	16.5486	2.67674	10.0899	10.2203	8.12944	11.9053	3.77588	5.22044	2.78505	-0.184558	0	1.54852	1.12822	2.70291
MSMEG_1771	1.16784	13.1749	2.6777	9.10524	10.1068	7.84129	10.7465	2.90523	5.20751	2.95101	-0.947687	0	1.57289	1.10481	2.72729
MSMEG_1772	0.634942	11.9688	2.40209	7.61028	8.10648	5.91649	9.31608	3.39958	5.2016	2.57719	-0.571835	0	1.32342	1.07867	2.47782
MSMEG_1773	4.95134	13.3226	1.9934	9.9545	10.5375	8.79178	11.3194	2.52759	5.23599	2.78479	-0.818261	0	0.868828	1.12457	2.02322
MSMEG_1774	3.812	14.0129	2.36795	9.80169	10.3598	8.32761	11.5773	3.24968	5.22553	2.7986	-0.798009	0	1.24735	1.1206	2.40174
MSMEG_1775	0.420055	11.316	2.44583	6.7541	7.47024	5.23342	8.39966	3.16623	5.18213	2.43705	-0.579395	0	1.36791	1.07791	2.52231
MSMEG_1776	5.10061	9.10364	0.889814	7.16118	7.03044	6.53816	7.85401	1.31586	5.24982	2.43662	0.15751	0	-0.183689	1.0735	0.970706
MSMEG_1777	2.70201	13.9484	2.44989	9.91144	10.5964	9.13204	11.6696	2.53758	5.22338	3.04022	-0.947542	0	1.32645	1.12344	2.48085
MSMEG_1778	0.319338	9.61278	2.82811	4.05758	3.05476	1.61531	6.74058	5.12527	5.00785	1.716	0.438597	0	1.61782	1.21029	2.77222
MSMEG_1779	0.356668	9.74727	2.22556	4.28751	3.70107	2.54124	5.86179	3.32056	5.12243	2.17308	0.491224	0	1.0277	1.19786	2.18209
MSMEG_1780	1.67887	11.4692	2.50209	7.01687	7.02986	5.27358	9.36944	4.09586	5.18973	1.88173	-0.17245	0	1.4272	1.07489	2.5816
MSMEG_1781	0	10.1128	2.78476	5.65183	5.98814	3.26399	8.03176	4.76776	5.10914	2.02782	-0.408759	0.00520833	1.67266	1.1121	2.82706
MSMEG_1782	0.962625	12.8489	2.58452	8.05646	8.55705	6.69987	10.0966	3.39675	5.19873	2.6463	-0.708192	0	1.49567	1.08885	2.65006
MSMEG_1783	0.105997	10.2117	2.43983	5.12003	5.31321	3.45281	7.26375	3.81094	5.12149	2.18678	-0.352498	0	1.29762	1.1422	2.45202
MSMEG_1785	0	5.51541	1.38552	1.12405	0.653075	0.162974	1.51336	1.35039	4.64098	6.16158	1.9213	0.0885417	0.149194	1.23632	1.30359
MSMEG_1786	5.04395	11.9737	1.36908	8.79731	8.76544	7.96367	9.53731	1.57364	5.24534	2.87952	0.0600826	0	0.269864	1.09922	1.42426
MSMEG_1787	0.34787	11.9187	2.33918	6.41158	6.64412	5.3883	8.18741	2.79911	5.17912	2.82805	-0.606843	0	1.25617	1.08301	2.41057
MSMEG_1788	2.63927	13.04	2.24625	9.22899	9.63363	7.93745	11.0313	3.09382	5.22522	2.81069	-0.705572	0	1.13894	1.10731	2.29334
MSMEG_1789	2.17709	11.9975	2.47253	7.84734	8.51926	6.26386	9.81602	3.55217	5.20287	2.29296	-0.512926	0	1.38831	1.08422	2.5427
MSMEG_1790	2.22274	12.7642	2.30081	8.13166	8.58548	6.82053	9.94407	3.12354	5.21383	2.52029	-0.538784	0	1.2106	1.0902	2.365
MSMEG_1791	3.5098	11.707	1.62308	6.98771	7.08565	6.05515	7.84094	1.78579	5.23023	2.84362	0.126627	0	0.547807	1.07528	1.7022
MSMEG_1792	0.271574	11.7826	2.58304	7.04755	7.41205	6.16064	8.71995	2.55931	5.17639	3.02193	-0.709627	0	1.50858	1.07445	2.66298
MSMEG_1793	1.2482	10.1901	2.10657	4.54331	4.15105	2.79314	6.10242	3.30928	5.15508	2.70803	0.754477	0	0.926079	1.18049	2.08047
MSMEG_1794	3.23834	14.8512	2.528	9.91216	10.4018	8.98342	11.7342	2.75077	5.2213	3.07685	-0.832539	0	1.40454	1.12345	2.55894
MSMEG_1795	1.7652	7.5115	1.04952	4.51906	4.32109	3.78157	5.07909	1.29752	5.23153	3.26271	0.75684	0	-0.132695	1.18222	1.0217
MSMEG_1796	1.74648	7.34054	0.832471	3.85856	3.73025	3.33495	4.20165	0.866698	5.23599	8.12693	1.63694	0	-0.387247	1.21972	0.767148
MSMEG_1797	1.78863	6.46274	0.796946	3.18416	3.09512	2.64649	3.53992	0.89343	5.22889	7.55925	1.63256	0	-0.444072	1.24102	0.710323
MSMEG_1798	1.44455	7.64211	1.47399	4.24756	3.86071	3.16256	5.43161	2.26905	5.19824	2.15365	0.441038	0	0.273784	1.2002	1.42818
MSMEG_1799	3.44487	6.66266	0.712354	5.22966	5.34052	4.77055	5.65999	0.889448	5.248	2.87749	-0.417888	0	-0.422866	1.13522	0.73153
MSMEG_1802	4.42757	14.1363	2.18593	10.1747	10.6174	8.69473	11.7704	3.07567	5.23297	2.56781	-0.610034	0	1.05537	1.13056	2.20976
MSMEG_1803	5.27716	11.5323	1.22962	8.94474	8.99528	7.98763	9.85871	1.87108	5.24794	2.61656	-0.176091	0	0.127844	1.10178	1.28224
MSMEG_1804	5.3516	11.0028	1.21838	8.25218	8.16957	7.30932	9.26392	1.9546	5.24665	2.16886	0.149485	0	0.12656	1.09182	1.28095
MSMEG_1805	1.33007	6.98565	1.04555	5.04926	5.23592	4.38472	5.855	1.47028	5.23452	3.17666	-0.656	0	-0.101171	1.14673	1.05322
MSMEG_1806	5.45905	12.0385	1.5412	9.0231	8.91353	7.88755	9.95277	2.06522	5.24293	2.37495	0.141585	0	0.437973	1.10322	1.59237
MSMEG_1807	7.63556	11.7043	0.848478	10.151	10.3259	9.7872	10.7689	0.981686	5.25392	3.36933	-0.884015	0	-0.281426	1.1299	0.872969
MSMEG_1808	4.62398	8.15013	0.720768	6.62542	6.69062	6.30901	7.03791	0.728908	5.25144	3.33037	-0.60551	0	-0.358649	1.07942	0.795747
MSMEG_1809	6.0846	10.0346	0.574968	8.55761	8.54378	8.17411	8.96346	0.789345	5.25522	5.06696	-0.434987	0	-0.520583	1.09555	0.633812
MSMEG_1810	0.91459	9.42281	1.67266	4.65688	4.80938	3.71796	5.74018	2.02222	5.18751	2.94394	-0.0899267	0	0.50009	1.17257	1.65448
MSMEG_1811	2.50977	9.1583	1.63005	6.46546	6.72768	5.23074	7.98704	2.75631	5.224	2.11565	-0.371745	0	0.54813	1.08192	1.70252
MSMEG_1812	3.45981	9.76288	1.34014	6.81824	6.81909	5.95479	7.96376	2.00897	5.23762	2.48809	-0.2427	0	0.26291	1.07723	1.41731
MSMEG_1813	6.56883	13.2806	1.26324	10.6672	10.6718	9.81902	11.6532	1.8342	5.25038	2.74479	-0.312122	0	0.118284	1.14496	1.27268
MSMEG_1814	0	7.39997	1.80175	4.32482	4.63305	3.01517	5.71138	2.69621	5.15695	2.21783	-0.372628	0.00520833	0.606171	1.19558	1.76057
MSMEG_1815	0	5.89649	1.07272	1.28796	1.14851	0.506877	1.76047	1.25359	4.93422	8.0644	1.79586	0.0625	-0.165646	1.23836	0.988749
MSMEG_1816	0	7.75395	1.32753	2.28768	2.13488	1.44217	2.8553	1.41313	5.10464	8.36927	1.75948	0.00520833	0.084334	1.24319	1.23873
MSMEG_1817	6.23386	10.7301	0.831163	9.17682	9.28186	8.72709	9.79389	1.0668	5.25327	4.05665	-0.931286	0	-0.275073	1.10624	0.879322
MSMEG_1818	0.912927	7.67562	1.10923	5.30344	5.39423	4.62855	6.09621	1.46766	5.23355	4.18015	-0.745677	0	-0.021336	1.13057	1.13306
MSMEG_1819	6.47291	10.4175	0.813489	8.63162	8.70472	7.99012	9.32987	1.33976	5.25302	2.39442	-0.327551	0	-0.283127	1.09662	0.871268
MSMEG_1820	3.87007	7.14818	0.621804	5.76797	5.81606	5.4016	6.13201	0.730413	5.25161	3.29577	-0.314176	0	-0.485095	1.1069	0.6693
MSMEG_1821	4.5352	10.8376	1.1785	8.34778	8.41921	7.68289	9.17601	1.49313	5.24713	3.61901	-0.66198	0	0.0856343	1.09287	1.24003
MSMEG_1822	5.19303	9.92416	1.032	7.6922	7.65717	7.12129	8.55123	1.42993	5.2484	2.42915	-0.192926	0	-0.0485192	1.08052	1.10588
MSMEG_1823	3.68068	7.04881	0.67457	5.88368	6.05132	5.43033	6.41582	0.985488	5.25063	3.69724	-1.05248	0	-0.427423	1.10199	0.726972
MSMEG_1824	6.77892	10.7335	0.705498	9.54459	9.68591	9.18652	10.0422	0.855662	5.25469	4.74558	-1.12404	0	-0.408808	1.11431	0.745587
MSMEG_1825	2.92798	8.47081	0.751149	6.81662	6.96374	6.54699	7.30698	0.759991	5.25096	7.8345	-1.65586	0	-0.326095	1.07724	0.828301
MSMEG_1826	2.9087	7.36095	0.962631	5.8152	5.84249	5.23378	6.58828	1.3545	5.24321	2.94511	-0.577447	0	-0.14224	1.10487	1.01216
MSMEG_1827	1.6748	5.9312	0.828079	4.19225	4.22308	3.61294	4.86513	1.2522	5.23723	2.69241	-0.345888	0	-0.375226	1.20331	0.779169
MSMEG_1828	5.34556	9.79352	1.02221	8.1749	8.336	7.4931	8.91942	1.42632	5.24946	2.82494	-0.599126	0	-0.0686623	1.09087	1.08573
MSMEG_1829	5.38447	9.1905	0.874291	7.2897	7.36886	6.63775	7.8768	1.23905	5.25026	2.2879	-0.145885	0	-0.199462	1.07375	0.954933
MSMEG_1830	6.15417	9.22582	0.764565	7.59685	7.67367	6.90683	8.18679	1.27996	5.25244	1.86064	0.0197074	0	-0.313818	1.07838	0.840577
MSMEG_1831	5.38612	11.2851	0.99339	8.85134	8.79199	8.32397	9.49933	1.17536	5.2511	3.84442	-0.308725	0	-0.10674	1.10013	1.04766
MSMEG_1832	3.1799	8.42395	1.21178	5.68189	5.38367	4.7654	6.66377	1.89837	5.23493	2.19182	0.264019	0	0.10106	1.11072	1.25546
MSMEG_1833	4.8817	9.10292	0.75061	7.2179	7.33755	6.92379	7.70559	0.781803	5.25196	3.58323	-0.657439	0	-0.322846	1.07346	0.83155
MSMEG_1834	7.2086	9.27897	0.410813	8.43535	8.48808	8.17499	8.70909	0.534091	5.25631	2.83519	-0.377543	0	-0.683113	1.09393	0.471282
MSMEG_1835	4.84374	7.41359	0.537017	6.21436	6.29663	5.86466	6.63345	0.768785	5.25372	2.64314	-0.494079	0	-0.551564	1.08858	0.602831
MSMEG_1836	7.05958	9.45986	0.586341	8.52005	8.632	7.9907	8.99763	1.00694	5.25511	2.16387	-0.451065	0	-0.508693	1.09503	0.645702
MSMEG_1837	5.71193	9.66653	0.706238	7.60461	7.60057	7.12859	8.00931	0.880717	5.25319	3.29506	0.000218375	0	-0.372312	1.07855	0.782083
MSMEG_1838	5.00296	7.82535	0.540311	6.16836	6.18177	5.71456	6.46145	0.746894	5.25371	3.36073	0.456607	0	-0.550002	1.09031	0.604393
MSMEG_1839	3.35312	7.35427	0.921463	5.22007	5.19481	4.45001	5.79811	1.3481	5.242	2.43389	0.210099	0	-0.214368	1.13583	0.940027
MSMEG_1840	0	3.15784	0.601836	0.865959	0.7785	0.435164	1.18254	0.74738	5.00512	3.79599	0.894123	0.0677083	-0.631383	1.23322	0.523012
MSMEG_1841	0	3.0892	0.639378	0.92972	0.817684	0.486444	1.29364	0.807194	5.01181	3.55492	0.867144	0.0520833	-0.594572	1.23395	0.559823
MSMEG_1842	4.71009	8.12652	0.687438	6.44044	6.50959	5.98874	6.89907	0.91033	5.25176	2.78476	-0.210574	0	-0.394968	1.08241	0.759427
MSMEG_1843	5.03184	12.5183	1.67838	10.0323	10.5107	9.56772	11.1482	1.58048	5.24219	4.07638	-1.34354	0	0.551726	1.12665	1.70612
MSMEG_1844	1.80313	7.78334	1.12157	4.13836	3.96493	3.36839	4.7632	1.39482	5.22206	3.48585	0.728624	0	-0.0846178	1.20618	1.06978
MSMEG_1845	1.82848	6.25107	0.699144	3.69434	3.70283	3.25352	4.02951	0.775988	5.24017	5.59073	0.88596	0	-0.528258	1.2274	0.626138
MSMEG_1846	0	8.64333	1.83718	4.1598	3.93312	2.89878	5.7085	2.80972	5.15146	2.45267	0.137819	0.0104167	0.632127	1.20505	1.78652
MSMEG_1847	0.199657	6.75411	1.43236	3.02029	2.64862	2.00275	4.27572	2.27297	5.1429	2.35137	0.422122	0	0.192119	1.24025	1.34651
MSMEG_1848	5.47651	10.8693	1.12101	8.03545	7.76808	7.19312	9.00871	1.81559	5.24795	2.40043	0.448856	0	0.0325735	1.08843	1.18697
MSMEG_1849	4.64322	8.67132	0.812506	6.75463	6.86063	6.21536	7.22613	1.01077	5.25024	2.61879	-0.0394683	0	-0.2654	1.07791	0.888995
MSMEG_1850	3.60171	7.4352	0.736593	5.52369	5.46856	5.094	5.89014	0.796143	5.24875	3.04736	0.442054	0	-0.381702	1.1183	0.772693
MSMEG_1852	3.21328	8.66884	0.869175	6.49416	6.42359	5.95314	7.08785	1.13471	5.2484	3.63933	-0.166835	0	-0.212219	1.08139	0.942177
MSMEG_1853	0.857686	9.25462	1.97044	5.5985	5.77437	4.21385	7.33044	3.11659	5.18991	2.12685	-0.310195	0	0.855837	1.11461	2.01023
MSMEG_1854	2.13281	7.88233	0.831297	5.93133	5.91136	5.43336	6.40944	0.976079	5.24727	4.93927	-0.525	0	-0.268726	1.10002	0.885669
MSMEG_1855	1.3557	6.71929	0.791159	5.05776	5.03802	4.4953	5.57364	1.07834	5.24468	4.77843	-0.447464	0	-0.355022	1.14618	0.799373
MSMEG_1856	0.896268	5.78507	0.929003	3.18778	3.0889	2.49644	3.79751	1.30108	5.21571	3.1026	0.526318	0	-0.312018	1.24102	0.842377
MSMEG_1859	0	5.00373	1.21664	1.9184	1.65641	1.02922	2.74061	1.71139	5.0481	2.51996	0.56725	0.0104167	-0.0272678	1.2439	1.12713
MSMEG_1860	0.237519	6.03099	1.30766	2.66673	2.56594	1.66586	3.55783	1.89197	5.13046	2.51859	0.294064	0	0.0690236	1.23863	1.22342
MSMEG_1861	2.27708	7.2106	1.02209	5.64247	5.76921	4.97122	6.52335	1.55213	5.24031	2.82243	-0.552063	0	-0.090442	1.11253	1.06395
MSMEG_1862	1.15886	6.02991	1.08349	3.76052	3.9357	2.93399	4.62773	1.69374	5.21264	2.34621	-0.44798	0	-0.140781	1.22427	1.01361
MSMEG_1866	1.43889	6.48214	0.82526	3.98948	3.98281	3.54203	4.42954	0.887511	5.23594	4.12045	0.250681	0	-0.388329	1.21359	0.766066
MSMEG_1867	1.32353	5.57681	0.890854	3.33722	3.39529	2.62952	3.97984	1.35032	5.22082	2.26487	-0.0577874	0	-0.349308	1.24016	0.805088
MSMEG_1868	2.74639	7.6199	1.06477	5.29894	5.42144	4.60811	6.01382	1.40572	5.23665	2.59202	-0.272703	0	-0.0660721	1.13084	1.08832
MSMEG_1869	3.89521	8.54042	1.0136	6.38966	6.50923	5.70828	7.12955	1.42127	5.24445	2.71859	-0.547067	0	-0.0699014	1.0835	1.08449
MSMEG_1870	4.36513	9.47368	1.23724	7.02866	7.26869	6.18072	7.82434	1.64362	5.2416	2.4489	-0.295996	0	0.162518	1.07472	1.31691
MSMEG_1871	0.202585	4.33924	0.821726	1.90222	1.83512	1.29525	2.51026	1.215	5.16238	2.70665	0.405871	0	-0.422121	1.24385	0.732274
MSMEG_1872	3.00685	8.75754	1.20497	6.30796	6.52789	5.60395	7.30779	1.70384	5.23819	2.94788	-0.652621	0	0.119381	1.08559	1.27378
MSMEG_1873	0.947026	5.96218	1.01658	4.15085	4.04152	3.48079	5.00368	1.52289	5.22578	2.76841	-0.300113	0	-0.188954	1.20553	0.965441
MSMEG_1874	5.80825	11.2804	0.854272	9.18268	9.18324	8.62572	9.80889	1.18316	5.2531	4.4599	-0.45248	0	-0.252084	1.10636	0.902312
MSMEG_1875	6.13093	9.79793	0.69462	8.06675	8.07086	7.68107	8.55456	0.873484	5.25376	2.77926	-0.287852	0	-0.394426	1.08905	0.759969
MSMEG_1876	4.7882	8.91615	0.688728	7.03578	7.12096	6.63529	7.43495	0.79966	5.25265	3.35748	-0.350534	0	-0.385891	1.07462	0.768504
MSMEG_1877	1.15723	7.72432	1.18125	3.49054	3.35428	2.72238	3.90899	1.18661	5.2049	5.4844	1.33779	0	-0.055443	1.23669	1.09895
MSMEG_1878	5.15449	12.7608	1.85703	8.16263	7.88406	6.68338	9.57064	2.88726	5.23232	2.37315	0.531949	0	0.766339	1.09069	1.92073
MSMEG_1880	0.222212	6.23232	1.48472	2.47543	2.30435	1.24625	3.19574	1.94949	5.07621	2.43008	0.591047	0	0.243656	1.24106	1.39805
MSMEG_1881	7.753	10.259	0.561483	9.29692	9.29605	8.81196	9.73903	0.927077	5.25567	2.18979	-0.158977	0	-0.54726	1.10874	0.607135
MSMEG_1882	4.94556	8.05142	0.736018	6.57585	6.58265	6.16641	7.12518	0.958774	5.25119	2.4315	-0.193442	0	-0.344076	1.08009	0.810319
MSMEG_1883	6.31724	10.6912	0.931308	8.13061	8.03184	7.52715	8.7444	1.21725	5.25106	3.176	0.535694	0	-0.158878	1.09019	0.995517
MSMEG_1884	3.58266	8.7069	0.860444	6.64611	6.76237	6.24769	7.23638	0.988695	5.24875	4.08943	-0.821918	0	-0.21871	1.07915	0.935685
MSMEG_1885	6.01357	11.1177	1.08573	8.6571	8.74648	7.80341	9.39331	1.5899	5.24963	2.43204	0.0377023	0	-0.0112675	1.097	1.14313
MSMEG_1886	7.73956	14.2529	1.09039	11.1552	11.2225	10.5284	11.756	1.22755	5.2527	4.10375	-0.0813703	0	-0.0698738	1.16026	1.08452
MSMEG_1887	2.29814	7.16764	1.11083	5.03015	5.0316	4.20774	5.92059	1.71286	5.23212	2.40652	-0.311133	0	-0.0371235	1.14795	1.11727
MSMEG_1888	2.1699	7.92318	1.14454	4.85469	4.98025	4.10587	5.60948	1.50361	5.22893	3.04576	-0.0432406	0	-0.0147779	1.15932	1.13962
MSMEG_1889	3.95069	7.4506	0.612284	6.15729	6.21285	5.7838	6.60813	0.824333	5.25247	3.35916	-0.476179	0	-0.478475	1.09076	0.675921
MSMEG_1890	5.71328	8.68562	0.588051	7.38321	7.47497	7.00196	7.73838	0.736425	5.25429	3.05791	-0.474394	0	-0.486609	1.07466	0.667786
MSMEG_1891	5.24639	9.26497	0.660831	6.43347	6.39876	6.02134	6.69733	0.675995	5.25249	7.45486	1.64886	0	-0.421717	1.08255	0.732679
MSMEG_1892	6.26039	9.91379	0.621507	7.4343	7.40164	7.08851	7.69289	0.604378	5.25409	4.90814	0.914555	0	-0.453861	1.07537	0.700534
MSMEG_1893	4.31358	8.07547	0.666463	6.01809	5.96065	5.59294	6.43864	0.845699	5.25145	3.58881	0.418409	0	-0.430008	1.09647	0.724387
MSMEG_1894	5.01043	7.9734	0.660882	6.39334	6.32594	5.98862	6.89586	0.907239	5.25218	2.59912	0.12005	0	-0.422535	1.08342	0.731861
MSMEG_1895	1.26178	7.6539	1.10272	3.80224	3.68448	3.20173	4.24015	1.03842	5.21718	5.39214	1.00133	0	-0.119611	1.22233	1.03478
MSMEG_1896	0.537099	10.7011	1.62413	3.13185	2.83187	2.07721	3.55222	1.47501	5.1431	7.31191	1.87428	0	0.383222	1.2409	1.53762
MSMEG_1897	0	9.31379	1.44496	2.75897	2.5976	1.89836	3.19286	1.2945	5.13241	7.12016	1.67272	0.015625	0.206414	1.23854	1.36081
MSMEG_1898	0.674738	9.02844	1.23457	3.11244	2.7989	2.48546	3.34596	0.860505	5.18935	7.72317	1.9076	0	-0.00625304	1.24082	1.14814
MSMEG_1899	0.350726	6.60711	0.944375	1.73087	1.56815	1.08381	2.16905	1.08524	5.12748	7.52422	1.71503	0	-0.298527	1.2429	0.855869
MSMEG_1900	2.87779	6.60371	0.765891	5.02647	5.13852	4.54926	5.54672	0.997451	5.24563	2.64969	-0.317162	0	-0.382295	1.14819	0.772101
MSMEG_1901	4.51244	10.5836	0.96081	6.90256	6.91643	6.34239	7.31675	0.974367	5.24809	5.65387	0.866469	0	-0.115497	1.07631	1.0389
MSMEG_1902	4.16301	8.21793	0.762137	6.22734	6.339	5.84382	6.70608	0.862255	5.24984	3.23112	-0.456459	0	-0.325988	1.08812	0.828407
MSMEG_1903	1.84945	7.96431	1.08741	3.83527	3.64778	3.07158	4.30398	1.2324	5.22071	6.13572	1.44727	0	-0.133384	1.2208	1.02101
MSMEG_1904	1.84427	6.40942	0.792552	3.2522	3.19482	2.76851	3.57416	0.805642	5.23006	7.13842	1.4983	0	-0.44834	1.24089	0.706055
MSMEG_1905	0.606635	6.41485	0.982423	2.64452	2.56145	2.00651	3.04445	1.03794	5.19497	6.91725	1.5408	0	-0.256333	1.23876	0.898062
MSMEG_1906	0.316562	6.50121	1.49406	2.26949	1.66611	1.1875	2.85833	1.67083	5.06901	3.84272	1.31786	0	0.250726	1.24333	1.40512
MSMEG_1907	0	6.10322	1.39298	1.84099	1.41111	0.931046	2.05001	1.11897	5.00278	3.94856	1.32496	0.015625	0.149401	1.24358	1.3038
MSMEG_1908	0.153216	7.16863	1.76454	2.2772	1.72688	1.13924	2.60081	1.46157	4.99713	3.97914	1.3766	0	0.521262	1.24327	1.67566
MSMEG_1909	0	6.5812	1.61158	3.38915	3.33632	2.03457	4.56122	2.52664	5.13423	2.04214	0.0471293	0.00520833	0.372251	1.23933	1.52665
MSMEG_1910	2.62447	9.6469	1.73583	5.79514	5.72527	4.2914	6.95222	2.66081	5.21273	2.19675	0.28533	0	0.630101	1.10573	1.7845
MSMEG_1911	1.06044	8.4732	1.93863	4.49675	4.38597	2.88414	5.81337	2.92923	5.16192	2.07623	0.233192	0	0.754814	1.18382	1.90921
MSMEG_1912	0.177424	6.65413	1.50954	2.85995	2.58233	1.73025	3.85772	2.12747	5.11929	2.73298	0.638849	0	0.270529	1.23901	1.42492
MSMEG_1913	1.34785	6.38258	0.956881	4.09563	4.14522	3.53953	4.61774	1.07821	5.22906	3.13832	-0.157652	0	-0.251502	1.20838	0.902894
MSMEG_1914	7.31224	11.9203	0.81881	9.67458	9.57099	9.10947	10.1281	1.01867	5.25398	3.50717	0.58504	0	-0.298616	1.11743	0.855779
MSMEG_1915	5.24316	10.1659	1.18626	7.71202	7.69819	6.91079	8.65138	1.74059	5.24549	2.11266	-0.223366	0	0.105279	1.08098	1.25967
MSMEG_1917	4.9081	9.89149	0.882782	7.51722	7.65347	6.93803	8.14758	1.20955	5.25046	3.19054	-0.458308	0	-0.194	1.07678	0.960396
MSMEG_1918	4.26548	8.34458	0.688929	6.93339	7.04044	6.54464	7.43949	0.894854	5.25241	4.01931	-0.820162	0	-0.387021	1.07595	0.767374
MSMEG_1919	5.34875	12.7703	1.08254	9.71975	9.69421	9.12805	10.3536	1.22558	5.25118	4.86296	-0.317886	0	-0.036002	1.11854	1.11839
MSMEG_1920	3.21282	9.44285	0.872877	7.68978	7.78496	7.296	8.28324	0.987233	5.25067	6.42905	-1.20241	0	-0.207586	1.08046	0.946809
MSMEG_1921	3.31246	8.77958	0.917711	6.5121	6.57846	6.03682	7.07201	1.03519	5.24719	4.05263	-0.584114	0	-0.163374	1.08109	0.991021
MSMEG_1922	1.66147	6.3983	0.738428	5.27945	5.44816	4.8575	5.78355	0.926044	5.24698	5.29765	-1.15788	0	-0.393626	1.13205	0.760769
MSMEG_1923	2.80815	6.80093	0.657527	4.84623	4.97663	4.53096	5.26381	0.732848	5.24798	3.80993	-0.582387	0	-0.502344	1.15987	0.652051
MSMEG_1924	2.29604	6.97589	0.660566	5.82755	5.78205	5.42024	6.36585	0.945602	5.25076	6.18446	-0.914352	0	-0.443781	1.10435	0.710614
MSMEG_1925	4.97818	9.10242	0.698852	7.05037	7.10199	6.61549	7.48908	0.873587	5.25256	3.3692	-0.155665	0	-0.37556	1.07441	0.778835
MSMEG_1926	5.57534	9.24442	0.530786	8.03925	8.08525	7.72885	8.38146	0.65261	5.25527	5.66587	-0.919878	0	-0.557722	1.08851	0.596673
MSMEG_1927	5.20868	8.275	0.55674	7.0467	7.01475	6.6992	7.48583	0.786624	5.25435	3.03282	-0.35948	0	-0.517722	1.07446	0.636673
MSMEG_1928	3.0054	6.17577	0.663141	4.80911	4.86105	4.35904	5.27652	0.917478	5.24782	2.6456	-0.299117	0	-0.499179	1.16232	0.655217
MSMEG_1929	4.26524	9.69855	0.8993	7.6079	7.50361	6.99588	8.24404	1.24816	5.25047	3.25774	-0.0605406	0	-0.17932	1.07862	0.975075
MSMEG_1930	6.63984	10.9342	0.85959	8.36934	8.38069	7.74115	8.9432	1.20205	5.25227	2.55923	0.256315	0	-0.233531	1.09312	0.920864
MSMEG_1931	5.07889	7.77663	0.570392	6.49397	6.65336	6.03052	6.9422	0.911686	5.2536	2.20978	-0.418795	0	-0.511005	1.0814	0.64339
MSMEG_1932	4.33442	10.2728	0.920845	7.94326	8.10271	7.35759	8.53133	1.17374	5.2505	4.86062	-0.853465	0	-0.165608	1.08645	0.988787
MSMEG_1934	5.83004	9.93171	0.960363	8.32483	8.52212	7.79022	9.07334	1.28312	5.25065	2.81056	-0.703077	0	-0.132244	1.09261	1.02215
MSMEG_1935	5.37989	9.13591	0.730199	7.51576	7.56211	7.13707	8.04111	0.904034	5.25268	3.38379	-0.594134	0	-0.346556	1.07675	0.80784
MSMEG_1936	5.0998	8.56274	0.622103	7.11056	7.24054	6.80901	7.53066	0.721652	5.25358	3.58541	-0.837	0	-0.451673	1.07378	0.702722
MSMEG_1937	7.20295	11.8545	0.857085	8.82084	8.75798	8.35811	9.15545	0.797345	5.25295	5.67463	1.20551	0	-0.242527	1.09961	0.911869
MSMEG_1938	5.38143	8.86174	0.621372	7.06031	7.08487	6.63248	7.41737	0.784897	5.25362	3.44299	-0.0904899	0	-0.45291	1.07428	0.701485
MSMEG_1939	1.82317	5.50686	0.698095	3.56127	3.57387	3.09277	4.06374	0.970965	5.23792	2.85288	-0.0729608	0	-0.535822	1.23392	0.618573
MSMEG_1940	2.72303	6.04607	0.693316	4.20775	4.10679	3.7543	4.68699	0.932693	5.24413	2.81351	0.40726	0	-0.509136	1.20245	0.645259
MSMEG_1941	4.00834	11.9853	1.45103	7.54982	7.37533	6.66097	8.34467	1.68371	5.23935	3.71132	0.528392	0	0.373622	1.07741	1.52802
MSMEG_1942	6.21961	10.8022	0.921835	8.80052	8.82563	8.22877	9.51748	1.28871	5.25198	2.56007	-0.178385	0	-0.177437	1.09927	0.976959
MSMEG_1943	6.67914	12.6592	1.03957	9.44239	9.34226	8.98849	9.81654	0.828051	5.25155	4.25117	0.589572	0	-0.0723789	1.11195	1.08202
MSMEG_1944	3.47971	7.3284	0.84234	5.28759	5.16783	4.7121	5.93729	1.22519	5.24481	2.36443	0.0987071	0	-0.289205	1.13155	0.86519
MSMEG_1945	6.92366	9.3106	0.535989	8.26165	8.3629	7.9049	8.68665	0.781742	5.25537	2.53485	-0.540812	0	-0.55593	1.09192	0.598465
MSMEG_1946	4.0769	10.8853	1.1383	6.18861	6.08084	5.53366	6.65518	1.12152	5.24208	9.05277	1.9821	0	0.0487716	1.08953	1.20317
MSMEG_1947	3.4279	11.1682	1.50126	7.19449	7.11168	6.32293	7.89514	1.57221	5.23574	3.14722	0.266076	0	0.42782	1.07344	1.58222
MSMEG_1950	2.35054	15.1749	2.69265	10.5903	11.4741	9.40208	12.4625	3.06041	5.2208	3.25011	-1.04054	0	1.55002	1.14263	2.70442
MSMEG_1951	0.640244	13.6801	2.59545	9.19756	9.94543	7.76758	11.0567	3.28909	5.21216	2.94783	-0.827242	0	1.48879	1.10666	2.64319
MSMEG_1952	7.78731	12.3938	1.05235	9.81003	9.66091	8.99898	10.5845	1.58548	5.25182	2.26998	0.375409	0	-0.0684673	1.12081	1.08593
MSMEG_1953	1.5141	11.1525	1.898	5.55524	5.35031	4.32016	6.4315	2.11134	5.19987	2.89913	0.523884	0	0.781283	1.11671	1.93568
MSMEG_1954	6.08213	9.07753	0.551664	7.56693	7.58563	7.20868	7.90325	0.694567	5.25484	3.12412	-0.063427	0	-0.526094	1.07776	0.628301
MSMEG_1955	2.28914	7.61314	1.01468	5.40095	5.55377	4.6045	6.1707	1.56621	5.23926	2.60392	-0.332725	0	-0.110162	1.12484	1.04423
MSMEG_1957	6.42398	10.2339	0.698265	8.51157	8.51688	8.03985	8.88896	0.849109	5.25414	3.62002	0.0444001	0	-0.396654	1.09492	0.757741
MSMEG_1958	4.3281	8.59695	0.765302	6.52918	6.60248	6.11302	7.09004	0.977029	5.25048	2.9597	-0.505759	0	-0.315503	1.0808	0.838892
MSMEG_1959	9.0122	12.1335	0.641877	10.7594	10.8189	10.4988	11.1685	0.66964	5.2557	3.35973	-0.663228	0	-0.505904	1.14778	0.648491
MSMEG_1960	1.65008	6.40109	0.902402	4.44681	4.66041	3.8758	5.01964	1.14384	5.2357	3.13273	-0.546548	0	-0.285033	1.18743	0.869363
MSMEG_1961	2.20668	7.16401	0.987912	4.48537	4.4788	3.82422	5.04456	1.22034	5.2332	2.77272	0.212979	0	-0.196729	1.18464	0.957666
MSMEG_1962	2.63475	7.19271	0.847258	4.71569	4.66431	4.25113	5.04099	0.789854	5.24159	3.4456	0.447665	0	-0.321308	1.16857	0.833088
MSMEG_1963	4.33523	9.41493	0.823396	6.7116	6.62097	6.24397	7.01958	0.775608	5.25017	4.5912	0.778122	0	-0.254985	1.07838	0.89941
MSMEG_1964	1.5132	8.40632	1.04679	3.84664	3.78307	3.3153	4.20743	0.892127	5.22424	9.5293	1.92529	0	-0.17348	1.22027	0.980915
MSMEG_1966	0.845843	7.68015	1.3191	3.10923	2.93951	2.25501	3.97352	1.71851	5.16949	3.65197	0.730142	0	0.0782942	1.24081	1.23269
MSMEG_1967	2.03408	6.53409	0.849103	3.98021	3.99223	3.35569	4.38681	1.03112	5.23521	3.84677	0.58732	0	-0.364927	1.21403	0.789468
MSMEG_1968	1.03801	7.07062	1.20546	3.7079	3.63022	2.95282	4.20904	1.25622	5.20714	3.94891	0.907794	0	-0.0212956	1.22675	1.1331
MSMEG_1969	0.284428	7.10126	1.46292	2.47748	2.09385	1.58692	2.80352	1.2166	5.10363	4.55911	1.3981	0	0.221889	1.24103	1.37628
MSMEG_1970	3.25386	15.0706	2.59237	7.23441	6.28456	5.08681	8.95535	3.86853	5.19698	2.63444	0.803668	0	1.51888	1.07349	2.67327
MSMEG_1971	0	13.6891	2.48734	3.01229	2.24093	1.29597	4.23799	2.94202	4.95935	5.30107	1.48675	0.00520833	1.24715	1.24019	2.40155
MSMEG_1972	0	10.91	1.6225	1.28471	0.68056	0.295461	1.57513	1.27967	4.68773	13.4611	2.78878	0.046875	0.384182	1.23832	1.53858
MSMEG_1973	0.380052	11.8233	1.71043	2.69111	2.28303	1.62222	3.35132	1.7291	5.08753	9.13989	1.99755	0	0.471882	1.23855	1.62628
MSMEG_1974	0	11.9865	1.62288	1.63018	1.1974	0.705034	2.02636	1.32133	4.88999	16.6509	3.02355	0.0416667	0.380793	1.24208	1.53519
MSMEG_1975	0.716228	13.0969	1.80021	3.56526	3.12892	2.48201	4.27255	1.79054	5.14807	8.79632	1.90922	0	0.566472	1.23373	1.72087
MSMEG_1976	0.90819	11.9629	1.37417	3.45193	3.10652	2.63763	4.01174	1.37411	5.19017	13.9403	2.43311	0	0.136303	1.23787	1.2907
MSMEG_1977	3.24582	13.448	1.31481	5.9178	5.8321	5.23805	6.33534	1.09729	5.23481	10.8784	1.8242	0	0.214225	1.10058	1.36862
MSMEG_1978	3.00972	12.5851	1.29295	5.0014	4.72449	4.20191	5.47147	1.26956	5.22812	11.5811	2.24118	0	0.143157	1.1498	1.29755
MSMEG_1979	1.17226	11.5581	1.30095	3.3878	3.15335	2.64732	3.90038	1.25306	5.19454	14.7327	2.4652	0	0.0615968	1.23936	1.21599
MSMEG_1980	5.1161	8.83408	0.714824	6.89605	6.88693	6.45262	7.26008	0.807461	5.25217	3.39146	0.285219	0	-0.361557	1.07638	0.792839
MSMEG_1981	6.46339	11.6821	0.909476	8.01125	7.86872	7.32673	8.53003	1.2033	5.25125	3.86235	0.892276	0	-0.178459	1.08793	0.975937
MSMEG_1982	3.43184	7.62012	0.801007	5.5431	5.36767	5.05528	5.93699	0.881711	5.24726	3.67925	0.567001	0	-0.316311	1.11732	0.838085
MSMEG_1983	0.932602	7.62067	1.11041	3.13655	3.04746	2.48282	3.62808	1.14526	5.20037	7.55767	1.56136	0	-0.130508	1.24092	1.02389
MSMEG_1984	0	6.9405	1.26881	2.85537	2.76556	2.02315	3.43936	1.41622	5.15878	4.55251	0.842247	0.00520833	0.0298289	1.23898	1.18422
MSMEG_1985	2.12086	6.3005	0.758921	4.22451	4.16425	3.82376	4.71571	0.891948	5.24111	3.51142	-0.0074358	0	-0.442595	1.20152	0.7118
MSMEG_1986	4.20613	9.89712	1.28801	6.75471	6.76111	5.71517	7.60787	1.8927	5.23941	2.42062	0.222869	0	0.2101	1.07791	1.3645
MSMEG_1987	0	11.158	2.1032	3.62154	3.14162	2.29042	4.22976	1.93934	5.10171	4.94786	1.36877	0.0208333	0.872246	1.23095	2.02664
MSMEG_1988	0	9.17004	1.91358	2.22783	1.74082	1.07184	2.51478	1.44294	4.94724	5.29686	1.69031	0.0260417	0.669977	1.2436	1.82437
MSMEG_1989	0.0996498	8.2673	1.71396	2.58694	2.21282	1.43774	2.89651	1.45877	5.06495	4.82043	1.47521	0	0.474664	1.23929	1.62906
MSMEG_1990	0.395505	9.23984	1.742	2.83232	2.39307	1.74458	3.00767	1.26309	5.09873	5.39268	1.67956	0	0.503154	1.23884	1.65755
MSMEG_1991	2.60309	8.06651	0.904493	4.9863	4.79909	4.41839	5.47699	1.05859	5.24168	4.21611	0.88835	0	-0.246274	1.15077	0.908122
MSMEG_1992	0.840518	6.86283	0.909644	3.57421	3.54867	3.1162	3.92917	0.812976	5.22551	6.03035	0.809996	0	-0.323672	1.23332	0.830723
MSMEG_1993	0.518023	7.1562	0.980979	3.92098	4.01993	3.40334	4.36092	0.957584	5.22518	5.7629	0.365802	0	-0.23584	1.21682	0.918555
MSMEG_1995	5.8702	10.0157	0.801503	7.92003	8.05674	7.44866	8.5114	1.06274	5.25229	2.88053	-0.495383	0	-0.284421	1.08592	0.869974
MSMEG_1996	5.97574	10.319	0.924505	8.05861	8.00739	7.4669	8.62295	1.15605	5.25098	2.63786	0.2838	0	-0.164385	1.08889	0.99001
MSMEG_1997	5.65225	9.85048	0.813556	7.5477	7.49188	6.98349	8.02005	1.03657	5.25179	3.08889	0.517314	0	-0.263814	1.07737	0.890581
MSMEG_1998	2.13176	6.00202	0.826582	3.78736	3.72338	3.15411	4.28084	1.12673	5.23418	2.79369	0.494733	0	-0.396437	1.22302	0.757958
MSMEG_2000	0.854792	4.41094	0.796076	2.29953	2.172	1.65539	2.86854	1.21315	5.19834	2.43925	0.450828	0	-0.447024	1.2431	0.707371
MSMEG_2004	0	6.35001	1.05818	2.49791	2.51003	1.77075	3.13573	1.36498	5.16558	5.04319	0.756104	0.00520833	-0.182535	1.24071	0.97186
MSMEG_2005	0.399339	7.3898	1.37659	3.79348	3.90838	2.9483	4.5167	1.56841	5.1859	3.16876	-0.0113935	0	0.153861	1.22273	1.30826
MSMEG_2006	1.33032	7.69217	1.14472	4.78607	4.80595	3.9671	5.42572	1.45863	5.22868	3.17811	0.244523	0	-0.0191324	1.16385	1.13526
MSMEG_2007	2.09789	8.27234	1.08808	4.44854	4.32975	3.72061	5.13297	1.41236	5.22795	3.05664	0.434791	0	-0.0992311	1.18731	1.05516
MSMEG_2009	4.78036	8.72979	0.694334	6.64535	6.6216	6.16511	7.11182	0.946709	5.25204	3.11423	0.0524973	0	-0.384829	1.07916	0.769566
MSMEG_2010	2.43262	9.39431	1.54231	5.59077	5.30172	4.5114	6.36803	1.85663	5.2205	2.93139	0.608801	0	0.427334	1.11498	1.58173
MSMEG_2011	0.170323	7.06917	1.20588	2.08377	1.94697	1.34591	2.6127	1.26679	5.10728	8.32087	1.79311	0	-0.0382043	1.24409	1.11619
MSMEG_2012	0.383813	7.23514	1.32365	2.59734	2.38597	1.83503	3.00697	1.17194	5.14226	6.12034	1.58811	0	0.0844764	1.23917	1.23887
MSMEG_2013	0	6.94998	1.44464	2.5116	2.11904	1.6177	3.34382	1.72612	5.09681	3.67958	0.92791	0.00520833	0.204153	1.24049	1.35855
MSMEG_2014	0	8.49986	1.91998	5.95659	6.42162	4.67258	7.54958	2.877	5.1965	2.75276	-0.765807	0.00520833	0.820991	1.09899	1.97539
MSMEG_2015	0	8.77457	2.10119	5.92661	6.63212	4.69401	7.42432	2.7303	5.17785	3.11771	-0.944452	0.015625	1.00097	1.10022	2.15537
MSMEG_2016	0	11.3438	2.32386	8.29009	9.12583	7.04984	10.0259	2.9761	5.20979	3.81404	-1.18233	0.00520833	1.23164	1.09222	2.38603
MSMEG_2017	0	7.24623	1.79082	4.8565	5.39498	3.74131	6.35782	2.61651	5.17574	2.55293	-0.723948	0.00520833	0.631627	1.1592	1.78602
MSMEG_2018	0	6.69888	1.14653	2.34775	2.18757	1.68474	2.89302	1.20828	5.14359	6.30868	1.32764	0.0104167	-0.0961288	1.24266	1.05827
MSMEG_2019	4.52786	8.57146	0.789581	6.23191	6.25805	5.67911	6.71328	1.03418	5.24959	3.35648	0.433779	0	-0.298386	1.08797	0.856009
MSMEG_2020	1.57698	5.92778	1.0734	3.68444	3.62676	2.84618	4.48114	1.63497	5.21446	2.17009	0.130404	0	-0.154475	1.22788	0.999921
MSMEG_2021	1.73391	7.13699	0.895083	3.99134	3.9962	3.40553	4.53694	1.13141	5.23284	5.21241	0.686218	0	-0.318418	1.2135	0.835978
MSMEG_2022	0.468183	7.95485	1.38841	2.69867	2.42936	1.76722	3.28532	1.5181	5.13707	4.92304	1.28674	0	0.149877	1.23853	1.30427
MSMEG_2023	0.586464	7.9977	1.47986	2.81691	2.42893	1.80151	3.53131	1.7298	5.13341	5.04787	1.35874	0	0.241102	1.23876	1.3955
MSMEG_2024	0	7.51935	1.4212	2.29955	2.07568	1.38666	2.6943	1.30764	5.08649	6.05818	1.57915	0.0104167	0.178096	1.2431	1.33249
MSMEG_2025	5.29029	9.38074	0.735607	6.79006	6.73877	6.24376	7.24006	0.996297	5.25175	3.78098	0.624711	0	-0.341919	1.07753	0.812476
MSMEG_2026	7.19959	12.0497	0.920639	9.6303	9.46321	8.9477	10.1683	1.22057	5.25298	2.70236	0.362207	0	-0.195709	1.11635	0.958686
MSMEG_2027	4.99406	13.3787	1.75549	9.35365	9.42031	8.37828	10.5938	2.2155	5.2394	2.89738	-0.224005	0	0.645516	1.10997	1.79991
MSMEG_2028	0.819973	8.32424	1.21222	2.90468	2.77119	2.24064	3.37561	1.13496	5.18226	10.0554	2.10512	0	-0.027114	1.23933	1.12728
MSMEG_2029	0.434144	7.68014	1.25508	3.12191	3.14039	2.38226	3.67959	1.29733	5.17846	5.29	0.939651	0	0.0142152	1.24086	1.16861
MSMEG_2030	1.03219	5.85794	0.864666	2.50952	2.31174	1.92484	2.92298	0.998143	5.20394	6.42099	1.51993	0	-0.375855	1.24052	0.77854
MSMEG_2032	3.48026	7.94509	0.938618	5.72442	5.72623	5.02812	6.29999	1.27188	5.24409	2.30034	0.147236	0	-0.170192	1.10881	0.984204
MSMEG_2033	5.13875	7.86665	0.640043	6.39069	6.31676	5.92707	6.80838	0.881314	5.25253	2.34903	0.252664	0	-0.443435	1.08348	0.710961
MSMEG_2034	0.188713	7.68192	1.1258	2.14132	2.09504	1.59846	2.41968	0.821219	5.1458	14.1338	2.80969	0	-0.118176	1.24397	1.03622
MSMEG_2035	4.09334	11.2302	1.61003	7.73561	7.70464	6.38788	9.19294	2.80507	5.23563	1.9951	0.000209531	0	0.528486	1.08154	1.68288
MSMEG_2036	1.23666	6.54593	1.25914	3.52861	3.24248	2.58304	4.2342	1.65116	5.19678	2.70741	0.751702	0	0.0238417	1.2353	1.17824
MSMEG_2037	3.91922	11.4181	1.38695	7.27358	7.01131	6.41764	7.9852	1.56756	5.23979	3.45391	0.634346	0	0.313297	1.07365	1.46769
MSMEG_2038	6.6562	9.86183	0.65158	8.02838	7.92134	7.60836	8.3833	0.774943	5.25426	2.88612	0.587122	0	-0.436708	1.08829	0.717688
MSMEG_2039	2.35315	6.291	0.956271	3.96605	3.69747	3.36706	4.66354	1.29648	5.22935	2.64701	0.61238	0	-0.258431	1.2147	0.895964
MSMEG_2040	0	6.31537	1.29433	1.93056	1.60494	1.01062	2.5562	1.54558	5.04732	4.70349	1.25839	0.0208333	0.0503862	1.24394	1.20478
MSMEG_2041	0.459017	7.07417	1.07922	4.48029	4.30578	3.78558	5.25981	1.47423	5.22744	3.34335	0.0729314	0	-0.105791	1.18501	1.0486
MSMEG_2042	1.55902	7.31353	1.02567	4.47641	4.32532	3.76832	5.01327	1.24495	5.23172	3.51146	0.561833	0	-0.159622	1.18529	0.994774
MSMEG_2043	1.07898	8.21188	1.27445	4.37311	4.44818	3.45605	5.2402	1.78415	5.21407	3.16919	0.181454	0	0.0819615	1.19249	1.23636
MSMEG_2044	4.58244	9.66354	0.926995	7.09976	7.2037	6.41426	7.74076	1.3265	5.24888	2.65281	-0.188175	0	-0.14687	1.07387	1.00752
MSMEG_2045	4.97264	9.34896	0.975781	7.76373	7.86414	7.36818	8.39389	1.02571	5.24926	3.40553	-0.90097	0	-0.106432	1.08221	1.04796
MSMEG_2046	2.22238	6.3618	0.697055	4.96393	5.04875	4.59877	5.36541	0.76664	5.24723	4.01611	-0.645281	0	-0.455154	1.15221	0.699241
MSMEG_2047	1.15916	6.46888	0.922538	3.07912	3.11635	2.48795	3.62966	1.14171	5.214	5.68483	0.90998	0	-0.318108	1.24065	0.836287
MSMEG_2048	4.27681	7.91514	0.654407	6.58714	6.6588	6.20078	7.08629	0.885512	5.25243	3.86929	-0.711486	0	-0.425526	1.07993	0.728869
MSMEG_2049	1.68305	7.46347	1.18726	4.6601	4.60505	3.98402	5.16248	1.17846	5.22443	2.9947	0.130741	0	0.0149127	1.17235	1.16931
MSMEG_2050	0.389727	6.84283	1.57897	2.51064	2.02152	1.48561	2.89427	1.40866	5.08713	4.00066	1.39658	0	0.338467	1.2405	1.49286
MSMEG_2051	0.441713	9.03098	1.80293	3.76754	3.24917	2.67677	4.08512	1.40834	5.15542	4.13651	1.338	0	0.578989	1.22394	1.73338
MSMEG_2052	1.32021	9.78368	2.01992	4.44906	3.84728	3.11395	4.9887	1.87475	5.16478	3.53404	1.19359	0	0.832643	1.18727	1.98704
MSMEG_2053	0	5.3843	1.32819	1.04938	0.546597	0.289624	1.00887	0.71925	4.65028	5.58139	1.9206	0.09375	0.092798	1.2354	1.24719
MSMEG_2054	0	8.89563	1.9052	3.44045	2.95163	2.3612	3.80447	1.44327	5.11917	3.97803	1.28451	0.00520833	0.667019	1.23818	1.82141
MSMEG_2055	0	9.49725	2.02303	3.38513	3.03505	2.134	3.90285	1.76886	5.07912	3.64073	0.998016	0.0416667	0.783618	1.23941	1.93801
MSMEG_2056	0	7.54985	1.94454	2.40727	1.73541	1.13805	2.56925	1.4312	4.97811	3.97107	1.43426	0.015625	0.702542	1.24199	1.85694
MSMEG_2057	0.3781	8.13528	1.99989	2.91549	2.12127	1.66636	3.09899	1.43264	5.06008	3.89193	1.45438	0	0.76047	1.23942	1.91487
MSMEG_2058	0.322564	11.261	2.45457	2.91359	1.91179	1.30903	3.89572	2.5867	4.9619	4.5607	1.52427	0	1.21517	1.2394	2.36957
MSMEG_2059	0	6.91979	1.63818	1.98327	1.35812	0.970544	2.2026	1.23206	4.97707	4.19342	1.54067	0.00520833	0.394116	1.24406	1.54851
MSMEG_2060	1.80132	10.1538	1.90193	4.75888	4.2229	3.50533	5.09927	1.59394	5.18514	3.57515	1.18705	0	0.736265	1.16566	1.89066
MSMEG_2061	0	6.60513	1.5247	1.46168	0.951557	0.445212	1.57042	1.12521	4.80503	4.42873	1.57206	0.046875	0.28431	1.24039	1.43871
MSMEG_2062	0	7.39274	1.79058	2.18382	1.74423	0.998347	2.65038	1.65203	4.94013	3.61911	1.20128	0.0677083	0.546764	1.24382	1.70116
MSMEG_2063	0	6.98216	1.54208	2.52737	2.20771	1.52768	2.7855	1.25782	5.08311	3.67242	1.14846	0.0208333	0.301865	1.24022	1.45626
MSMEG_2064	3.67754	9.45801	1.21549	6.14588	6.03043	5.2887	6.80124	1.51254	5.2385	3.23227	0.638585	0	0.124258	1.09123	1.27865
MSMEG_2065	3.16097	7.66446	0.86398	4.93843	4.73296	4.28018	5.5352	1.25502	5.24264	3.01686	0.653037	0	-0.289877	1.15386	0.864518
MSMEG_2066	0.66434	6.56145	0.924885	3.37052	3.33326	2.8339	3.77593	0.942022	5.22012	4.47255	0.610841	0	-0.314781	1.23967	0.839614
MSMEG_2067	0	6.60746	1.33638	3.02781	3.0226	2.00605	4.02713	2.02108	5.15434	2.7668	0.316699	0.0104167	0.0960797	1.2403	1.25047
MSMEG_2068	0.345228	5.20447	0.733088	3.00261	2.98948	2.624	3.42035	0.796347	5.22584	4.59841	-0.00286198	0	-0.507022	1.24011	0.647373
MSMEG_2069	1.27702	7.02806	0.787725	4.81328	4.87266	4.48182	5.24458	0.762763	5.24348	5.08715	-0.37598	0	-0.374319	1.16204	0.780076
MSMEG_2070	3.27072	9.41094	0.737562	7.33672	7.39171	6.96057	7.68232	0.721757	5.25228	7.66765	-0.590873	0	-0.336579	1.07414	0.817816
MSMEG_2071	1.17788	6.43619	0.877109	4.36181	4.44006	3.83354	4.91926	1.08572	5.23625	3.90097	-0.329778	0	-0.316117	1.19323	0.838278
MSMEG_2072	2.00359	6.43791	0.719349	4.58116	4.5591	4.19521	4.95215	0.756941	5.24496	4.01199	-0.0689116	0	-0.458472	1.17782	0.695923
MSMEG_2073	2.75777	8.3595	0.804582	6.42983	6.41029	5.9555	7.02546	1.06996	5.24944	4.31296	-0.471545	0	-0.278041	1.08262	0.876354
MSMEG_2074	2.46258	8.02157	1.02185	5.58089	5.63282	5.00922	6.1642	1.15499	5.24027	3.60487	-0.16552	0	-0.0936037	1.11546	1.06079
MSMEG_2075	4.46345	9.0128	1.00112	6.72735	6.83694	5.97287	7.3556	1.38273	5.24639	2.49158	0.0269117	0	-0.0770819	1.0782	1.07731
MSMEG_2076	2.35852	6.12219	0.692138	3.68348	3.62028	3.22681	4.02748	0.80067	5.2408	5.57544	1.19898	0	-0.535786	1.22792	0.618609
MSMEG_2077	1.22404	9.43081	1.29094	4.4354	4.4759	3.97834	5.0257	1.04736	5.21449	6.93569	0.69025	0	0.102696	1.18825	1.25709
MSMEG_2078	8.84119	14.5214	1.00588	12.1418	12.2998	11.6358	12.8244	1.18862	5.25399	4.09581	-0.784672	0	-0.186925	1.19281	0.967471
MSMEG_2079	5.40264	11.0255	1.26752	8.09206	7.95196	7.09572	9.04198	1.94625	5.2453	2.2223	0.178469	0	0.178007	1.08952	1.3324
MSMEG_2080	9.05078	13.7023	1.0368	11.6445	11.6637	10.9766	12.4162	1.43957	5.25351	2.65505	-0.264471	0	-0.139468	1.17626	1.01493
MSMEG_2081	7.29394	12.2227	1.0772	10.1007	10.0865	9.41327	10.9826	1.56931	5.25175	2.78074	-0.270251	0	-0.0513134	1.12851	1.10308
MSMEG_2083	3.90999	7.49303	0.685201	5.59894	5.54614	5.12639	6.04359	0.917198	5.25007	2.84884	0.259431	0	-0.429385	1.11459	0.72501
MSMEG_2084	4.35138	7.71395	0.540477	5.55038	5.42791	5.25782	5.80734	0.549522	5.25291	5.34203	1.07541	0	-0.576479	1.11696	0.577916
MSMEG_2085	6.62266	10.1706	0.714357	8.53004	8.59187	8.00208	9.07515	1.07307	5.25397	2.71277	-0.246139	0	-0.380812	1.09517	0.773583
MSMEG_2086	7.99816	11.3997	0.731739	10.0256	10.0442	9.4682	10.5289	1.06073	5.25483	2.40006	-0.0913122	0	-0.394731	1.12647	0.759664
MSMEG_2087	4.30571	7.75285	0.752763	6.37268	6.35814	5.97225	6.93284	0.960585	5.25036	2.95056	-0.524148	0	-0.331138	1.0839	0.823258
MSMEG_2088	2.17638	6.80273	0.899438	4.62953	4.60148	4.00886	5.24362	1.23477	5.23813	2.95256	-0.153757	0	-0.275015	1.17445	0.87938
MSMEG_2089	3.55831	8.39198	0.916547	6.34813	6.40252	5.68171	6.92403	1.24232	5.24703	3.06103	0.038051	0	-0.167963	1.08451	0.986432
MSMEG_2090	4.29003	9.42263	1.01718	6.96505	6.96826	6.25523	7.62042	1.36518	5.2467	2.9296	-0.139807	0	-0.0583864	1.07557	1.09601
MSMEG_2091	4.55105	8.43507	0.860248	6.64461	6.64581	6.08613	7.29263	1.2065	5.249	2.51928	-0.274211	0	-0.218925	1.07917	0.93547
MSMEG_2092	3.12443	8.45503	0.933471	5.6167	5.59621	5.14861	6.17407	1.02547	5.24358	3.62199	0.0652059	0	-0.180269	1.11374	0.974126
MSMEG_2094	0.754699	7.65179	1.86201	3.9375	3.71474	2.42054	5.52311	3.10257	5.14102	1.90573	0.201413	0	0.645961	1.21605	1.80036
MSMEG_2095	2.6372	6.68497	0.677605	4.20474	4.21715	3.69824	4.66477	0.966529	5.2446	3.16932	0.274828	0	-0.525014	1.20262	0.629381
MSMEG_2096	0.365296	7.04835	1.05681	3.29842	3.1862	2.68926	3.8192	1.12994	5.2083	5.89482	1.12422	0	-0.183773	1.24058	0.970622
MSMEG_2097	0.619513	4.96861	0.74036	2.21386	2.08055	1.79251	2.43206	0.639544	5.20718	6.75555	1.62782	0	-0.503317	1.24368	0.651079
MSMEG_2098	0.660526	5.76465	0.911196	2.99603	2.97672	2.4566	3.51824	1.06165	5.21105	4.23261	0.531209	0	-0.328863	1.24006	0.825532
MSMEG_2099	1.51442	7.28808	0.995545	4.25077	4.23878	3.6629	4.76698	1.10408	5.23012	4.46906	0.467595	0	-0.204473	1.20002	0.949922
MSMEG_2100	0.365998	8.04576	1.13699	4.06344	4.0259	3.387	4.55651	1.16951	5.21844	6.02665	0.830847	0	-0.0730016	1.21	1.08139
MSMEG_2101	0	6.17119	1.03166	2.13041	1.9971	1.53646	2.50884	0.972382	5.14949	6.9037	1.55298	0.00520833	-0.212341	1.244	0.942055
MSMEG_2102	0.772875	6.70289	1.07443	3.00517	2.95365	2.27986	3.50181	1.22195	5.19556	5.21943	0.948393	0	-0.165704	1.24013	0.988691
MSMEG_2103	0.247821	6.35025	1.05877	2.5973	2.57484	1.93344	3.2435	1.31005	5.17384	4.74165	0.706285	0	-0.180402	1.23917	0.973993
MSMEG_2104	2.3143	6.51132	0.749639	4.57844	4.5411	4.03066	5.00801	0.977346	5.24412	3.22683	0.211865	0	-0.428373	1.17801	0.726022
MSMEG_2105	2.53025	7.40999	0.850882	4.99183	5.1163	4.52258	5.49572	0.973134	5.24263	4.02992	-0.136889	0	-0.299529	1.15041	0.854866
MSMEG_2106	3.54097	7.24468	0.807688	5.55323	5.54325	5.00183	6.12047	1.11864	5.24687	2.50033	-0.0187628	0	-0.309127	1.11681	0.845269
MSMEG_2107	3.05337	9.94619	1.22829	7.24257	7.36652	6.69616	7.98758	1.29142	5.24199	4.69159	-0.94073	0	0.154773	1.07351	1.30917
MSMEG_2108	0.458907	6.53168	1.0046	2.53779	2.43455	1.99937	2.97702	0.977657	5.18465	6.87587	1.40343	0	-0.235432	1.24004	0.918963
MSMEG_2109	1.30976	7.6225	0.99704	2.96802	2.9336	2.42226	3.26919	0.846939	5.20884	12.083	2.36454	0	-0.242796	1.23984	0.911599
MSMEG_2110	4.75668	8.87994	0.732428	6.74272	6.72698	6.36706	7.05451	0.687445	5.25168	4.19647	0.473694	0	-0.345607	1.07804	0.808788
MSMEG_2111	4.9723	9.72022	0.919268	6.48017	6.31017	5.79372	7.04927	1.25555	5.24785	4.24461	1.01454	0	-0.162376	1.08164	0.99202
MSMEG_2112	4.33279	13.3151	2.21764	8.56233	8.76954	6.47232	10.2395	3.76715	5.22332	1.90866	-0.0234461	0	1.12202	1.09562	2.27642
MSMEG_2113	0	7.30362	1.39882	1.18036	0.728578	0.430761	1.34055	0.909784	4.78454	11.7679	2.86454	0.0208333	0.16179	1.23703	1.31619
MSMEG_2115	3.80745	13.4019	2.51812	8.46746	8.34986	6.12785	10.7284	4.60056	5.21217	1.86743	-0.0068113	0	1.42378	1.09434	2.57818
MSMEG_2116	3.3651	10.1696	1.2637	6.06974	6.25334	5.0862	6.85388	1.76767	5.23593	3.47505	0.324712	0	0.169335	1.09436	1.32373
MSMEG_2117	2.65832	8.34217	0.938775	4.77668	4.6898	4.2017	5.3425	1.1408	5.23838	3.61541	0.398998	0	-0.225698	1.16447	0.928698
MSMEG_2118	3.14103	7.42767	0.814412	5.07898	5.00355	4.53107	5.60256	1.07149	5.24464	2.84063	0.134411	0	-0.330413	1.14482	0.823982
MSMEG_2119	3.6664	7.63152	0.93528	5.54087	5.42111	4.80435	6.17633	1.37198	5.24343	2.31554	0.319879	0	-0.18215	1.11743	0.972245
MSMEG_2120	1.86884	7.90688	0.987381	3.83149	3.69134	3.29562	4.17652	0.880895	5.22727	7.69083	1.67347	0	-0.23359	1.22097	0.920805
MSMEG_2121	3.41987	9.43577	1.24282	6.57893	6.58159	5.65822	7.60807	1.94985	5.23936	2.325	-0.106243	0	0.162773	1.08005	1.31717
MSMEG_2122	2.10607	6.76562	1.01658	4.48645	4.37611	3.72387	5.38681	1.66294	5.23168	2.17723	0.108786	0	-0.167986	1.18456	0.986409
MSMEG_2123	4.52635	8.44371	0.976505	6.33545	6.26733	5.55242	7.16074	1.60832	5.24569	2.13925	0.181594	0	-0.108336	1.08484	1.04606
MSMEG_2124	1.73766	7.47284	1.23393	4.1945	4.14256	3.14816	5.02752	1.87936	5.21518	2.51207	0.502349	0	0.0307524	1.20318	1.18515
MSMEG_2125	1.31616	6.18788	0.981233	4.01935	4.01964	3.46487	4.7674	1.30253	5.22622	2.67038	-0.269626	0	-0.230921	1.21215	0.923474
MSMEG_2126	0	4.91572	1.3808	2.17957	1.97955	1.05369	3.41086	2.35717	5.03445	1.77908	0.222099	0.03125	0.136958	1.24384	1.29135
MSMEG_2127	1.23183	4.83742	0.716027	2.62116	2.5337	2.08349	3.12383	1.04033	5.22108	3.53747	0.611592	0	-0.522907	1.23893	0.631488
MSMEG_2128	0.775915	6.07187	1.30348	2.93541	2.75774	1.89958	3.73732	1.83774	5.16151	2.57849	0.628394	0	0.0639049	1.23957	1.2183
MSMEG_2130	0.267785	6.9487	1.57786	3.85948	3.83895	2.79807	5.04152	2.24345	5.16459	2.21782	-0.194011	0	0.358182	1.21968	1.51258
MSMEG_2131	1.59915	8.87704	1.60398	5.17703	5.19684	4.1451	6.25241	2.10732	5.20728	2.46951	-0.0571341	0	0.465405	1.13857	1.6198
MSMEG_2132	0	8.51423	1.50103	2.84769	2.61992	1.85085	3.50169	1.65084	5.12104	3.44641	0.812272	0.00520833	0.2621	1.23893	1.4165
MSMEG_2133	2.65675	7.52161	0.87491	4.98803	4.79289	4.46609	5.47558	1.00949	5.24241	3.63378	0.549324	0	-0.275745	1.15066	0.87865
MSMEG_2134	1.13675	5.26026	0.748047	2.91219	2.90583	2.41541	3.28914	0.873728	5.22449	3.46644	0.355638	0	-0.491344	1.23939	0.663052
MSMEG_2135	0.926355	6.02118	1.10878	3.51827	3.47869	2.68119	4.35086	1.66967	5.20652	2.52912	0.148247	0	-0.126921	1.2357	1.02747
MSMEG_2136	6.04946	9.82429	0.709007	8.0088	7.95187	7.51978	8.47131	0.951528	5.25362	2.75327	0.301103	0	-0.378876	1.08788	0.775519
MSMEG_2137	3.00247	6.87652	0.65543	4.93831	5.01884	4.63768	5.31307	0.675394	5.24854	3.62872	-0.239249	0	-0.498436	1.15387	0.65596
MSMEG_2140	0.47529	7.26501	1.25215	3.44126	3.46184	2.54258	4.29301	1.75043	5.18945	3.76172	0.440461	0	0.0139925	1.23816	1.16839
MSMEG_2141	0	5.01316	1.16312	1.5675	1.46257	0.564793	2.16263	1.59784	4.95506	3.12022	0.695988	0.0885417	-0.0783783	1.2415	1.07602
MSMEG_2142	3.77744	7.31512	0.78473	5.53208	5.44235	4.90685	5.96812	1.06127	5.24757	2.40272	0.331984	0	-0.333141	1.11787	0.821255
MSMEG_2143	3.79087	8.57072	0.881427	6.03216	6.08309	5.44975	6.59222	1.14247	5.24677	3.00626	0.0236927	0	-0.214469	1.0959	0.939926
MSMEG_2144	4.69357	10.5268	1.11982	7.5958	7.61898	6.87608	8.27942	1.40334	5.24654	2.91257	-0.0541053	0	0.0414572	1.07836	1.19585
MSMEG_2145	0	6.57688	1.47834	1.91191	1.73926	0.755503	2.74715	1.99164	4.94434	3.80086	0.942971	0.0885417	0.234457	1.24388	1.38885
MSMEG_2146	0.882747	9.14398	1.35265	3.65312	3.48286	2.99555	4.00627	1.01072	5.19684	8.56927	1.87397	0	0.123251	1.2294	1.27765
MSMEG_2147	0.0604022	6.84222	1.80151	2.21143	1.51543	0.993685	3.3291	2.33542	4.95299	2.76675	1.0266	0	0.557824	1.24369	1.71222
MSMEG_2148	0.188413	8.41166	1.71489	3.43211	3.18836	2.19741	4.32111	2.1237	5.13445	3.60069	0.79323	0	0.476504	1.23839	1.6309
MSMEG_2149	1.91142	8.02273	1.17036	4.47685	4.52049	3.75715	5.17026	1.41311	5.22294	3.41759	0.240651	0	-0.0148972	1.18526	1.1395
MSMEG_2152	1.97501	6.21107	0.848019	3.85482	3.83392	3.21425	4.33641	1.12216	5.23358	3.21591	0.417095	0	-0.371872	1.21989	0.782523
MSMEG_2153	2.90467	6.83872	0.801612	4.85518	4.7644	4.35782	5.299	0.941185	5.24409	3.10335	0.456515	0	-0.357672	1.15928	0.796723
MSMEG_2154	0	7.24414	1.39515	1.86646	1.40187	1.10042	2.37356	1.27314	5.02326	7.41163	1.97593	0.0260417	0.151448	1.2437	1.30584
MSMEG_2155	0.121353	6.59643	1.09886	1.71699	1.49045	1.14798	1.85276	0.704778	5.09687	9.64922	2.42798	0	-0.143941	1.2428	1.01045
MSMEG_2156	0.473161	6.62206	1.07595	2.4943	2.26144	1.93618	2.81513	0.878951	5.17542	6.71004	1.68114	0	-0.164814	1.24077	0.989582
MSMEG_2157	0.840688	10.8715	1.90635	4.45247	4.04467	3.08656	5.60218	2.51562	5.17286	4.4147	1.15902	0	0.719321	1.18703	1.87372
MSMEG_2158	0	7.21561	1.5855	2.23156	1.98365	1.26007	2.6893	1.42923	5.02036	5.06935	1.40467	0.0416667	0.341921	1.24358	1.49632
MSMEG_2159	1.13055	10.1845	1.92461	4.16835	3.75792	2.71582	5.23182	2.51599	5.15742	3.58201	0.94894	0	0.720009	1.2046	1.8744
MSMEG_2161	2.35755	9.25956	1.44743	5.01599	4.56508	4.12312	5.73842	1.6153	5.21836	3.49384	0.970758	0	0.29857	1.14886	1.45296
MSMEG_2162	1.69635	7.56263	1.2281	5.05844	5.14222	4.23807	5.97412	1.73605	5.22635	2.71248	-0.345955	0	0.081962	1.14614	1.23636
MSMEG_2163	2.57929	7.46416	1.04246	5.29721	5.28746	4.61365	5.97098	1.35733	5.23759	2.77885	-0.195506	0	-0.0884931	1.13095	1.0659
MSMEG_2164	6.56868	10.3333	0.868752	8.6683	8.65896	7.98999	9.39805	1.40806	5.2525	2.04971	0.0869163	0	-0.228415	1.09717	0.925981
MSMEG_2165	0.314991	7.01524	1.0948	2.30818	2.20902	1.65059	2.74187	1.09128	5.158	9.15136	1.90623	0	-0.148227	1.24303	1.00617
MSMEG_2166	0.232822	6.84782	1.2081	2.01622	1.86775	1.21369	2.65995	1.44625	5.09375	7.38044	1.60021	0	-0.0360006	1.2441	1.11839
MSMEG_2167	1.16998	7.252	1.0653	3.34083	3.23532	2.58662	4.00155	1.41493	5.20905	5.07354	0.99432	0	-0.17481	1.24011	0.979585
MSMEG_2169	0	11.6038	1.90015	2.09477	1.69817	0.78953	2.745	1.95547	4.93244	11.433	2.46708	0.015625	0.65608	1.24407	1.81048
MSMEG_2170	0	11.7396	1.90201	3.89078	3.91456	2.94449	4.70897	1.76448	5.13727	7.16315	1.31644	0.0260417	0.683788	1.21822	1.83818
MSMEG_2171	0	12.3949	2.12807	3.45066	2.843	2.01426	4.63058	2.61632	5.08176	5.81812	1.35096	0.00520833	0.890169	1.2379	2.04456
MSMEG_2172	0.830985	8.40504	1.61578	3.86925	3.5148	2.78071	4.72316	1.94245	5.17327	3.02088	0.740659	0	0.396557	1.21922	1.55095
MSMEG_2173	3.21816	7.47403	0.854251	5.45076	5.30052	4.86639	6.02218	1.15579	5.24527	2.82456	0.210993	0	-0.267852	1.1221	0.886543
MSMEG_2174	7.66773	11.2867	0.64226	9.45566	9.4434	8.95746	9.91645	0.95899	5.25519	2.87866	-0.0378167	0	-0.469989	1.11225	0.684406
MSMEG_2175	1.23626	9.90066	1.7174	4.75393	4.57064	3.57546	5.65411	2.07864	5.19413	3.52697	0.718615	0	0.551412	1.16599	1.70581
MSMEG_2176	4.93696	8.85402	0.803933	7.27587	7.28529	6.902	7.82581	0.923805	5.25126	3.16004	-0.53846	0	-0.269733	1.07367	0.884662
MSMEG_2177	1.70114	11.1285	2.02283	5.34618	4.92132	3.81013	6.89821	3.08808	5.18763	2.81367	0.602404	0	0.894841	1.12799	2.04924
MSMEG_2179	2.47774	7.72427	0.959799	4.69583	4.62297	4.21037	5.12465	0.914277	5.23707	3.95912	0.613638	0	-0.210112	1.16991	0.944284
MSMEG_2180	0.220077	5.98416	0.891762	2.24228	2.13603	1.71863	2.6783	0.959673	5.18517	8.24438	1.65381	0	-0.351751	1.24351	0.802644
MSMEG_2181	0	8.5934	1.4622	3.58288	3.43979	2.78906	4.07447	1.28541	5.17048	5.16737	0.796354	0.015625	0.229303	1.2329	1.3837
MSMEG_2182	0.741722	4.77655	0.755662	2.58229	2.6204	2.14353	2.97521	0.831678	5.21294	3.89604	0.144681	0	-0.48369	1.23935	0.670705
MSMEG_2183	1.15986	9.04909	1.28859	5.14936	4.97397	4.33002	5.85078	1.52076	5.22657	3.60121	0.54355	0	0.148251	1.14033	1.30265
MSMEG_2184	0	12.0216	2.44391	2.56576	1.74072	1.09398	2.94809	1.85411	4.88985	6.07592	1.86123	0.0520833	1.20433	1.23958	2.35872
MSMEG_2185	0	10.6449	2.16684	2.3808	1.7631	0.814761	3.32755	2.51278	4.87269	5.1815	1.4732	0.0989583	0.924528	1.24231	2.07892
MSMEG_2187	0.375788	11.6949	1.77621	5.12385	4.93354	4.10656	5.7972	1.69064	5.1981	5.15431	0.89452	0	0.634244	1.14196	1.78864
MSMEG_2188	4.7114	12.4084	1.35616	7.52129	7.53612	6.39559	8.75152	2.35593	5.24124	2.46978	0.124473	0	0.279299	1.07686	1.43369
MSMEG_2189	2.1376	9.55606	1.16802	4.84786	4.74303	4.00566	5.38555	1.37989	5.22997	5.27711	1.07169	0	0.00825143	1.15976	1.16265
MSMEG_2190	0.291055	6.10836	1.05141	1.95733	1.66405	1.33084	2.30861	0.977768	5.13366	7.33782	1.8194	0	-0.192607	1.24401	0.961789
MSMEG_2191	0.970309	6.93457	0.969745	2.91833	2.7766	2.39163	3.21261	0.820976	5.20908	9.18392	2.01283	0	-0.269694	1.23944	0.884701
MSMEG_2192	2.45377	6.14339	0.832649	4.40363	4.52609	3.825	4.9509	1.1259	5.23909	2.45215	-0.2987	0	-0.357798	1.19045	0.796597
MSMEG_2193	2.17089	13.3132	1.40286	4.45906	4.39656	3.79275	4.78428	0.991532	5.21759	23.2491	3.61753	0	0.216311	1.18655	1.37071
MSMEG_2194	2.34274	14.687	1.60383	4.49412	4.26882	3.75507	4.83325	1.07819	5.20897	24.4917	3.97606	0	0.41982	1.18401	1.57422
MSMEG_2195	3.26615	11.6331	1.15502	5.15494	5.01443	4.40116	5.60801	1.20685	5.23528	14.1458	2.45376	0	0.0150382	1.13998	1.16943
MSMEG_2196	5.79297	8.86226	0.616921	7.63156	7.70345	7.3223	8.04143	0.719124	5.25417	3.29512	-0.702712	0	-0.462218	1.07914	0.692177
MSMEG_2197	3.95499	7.98351	0.67154	6.15654	6.15599	5.71122	6.71514	1.00392	5.25151	2.87616	-0.137863	0	-0.419249	1.09079	0.735146
MSMEG_2198	6.01266	9.78402	0.690365	7.82273	7.85068	7.4954	8.34358	0.84818	5.25356	3.30589	-0.424394	0	-0.393264	1.08363	0.761131
MSMEG_2199	3.00916	8.96737	1.15956	6.02717	6.00415	5.245	6.80809	1.56309	5.23886	2.99903	0.112236	0	0.0634578	1.0961	1.21785
MSMEG_2200	3.74391	8.5283	0.948795	6.83559	7.05404	6.25347	7.53059	1.27711	5.2475	3.03114	-0.688421	0	-0.128246	1.07704	1.02615
[truncated: 4,312 more rows]

## Sheet: Mab
gene	MinExpr	MaxExpr	SD_logRPKM	Mean_logRPKM	Median_logRPKM	Q.25_logRPKM	Q.75_logRPKM	IQR_logRPKM	ShannonIndex	Kurtosis	Skewness	ZeroExpr_proportion	residual.SD_logRPKM	LOESS.fit	TP
MAB_0002	3.8291	9.39295	0.869835	8.05931	8.18374	7.54192	8.71892	1.177	4.65731	6.71401	-1.23312	0	-0.15202	1.02186	0.924524
MAB_0003	5.82051	9.86105	0.84518	8.32527	8.33298	7.72328	9.08397	1.36069	4.65823	2.76675	-0.429237	0	-0.183363	1.02854	0.893182
MAB_0004	2.38703	7.29225	0.855767	5.54098	5.58873	5.08837	6.10796	1.0196	4.65096	4.05865	-0.686914	0	-0.200191	1.05596	0.876353
MAB_0005	3.68956	8.04593	0.959179	5.53664	5.45742	4.89997	6.1265	1.22653	4.64877	2.65727	0.442287	0	-0.0969742	1.05615	0.97957
MAB_0006	9.64599	13.8546	0.949105	12.1719	12.5008	11.6318	12.7702	1.13837	4.66035	3.35995	-0.913464	0	-0.224768	1.17387	0.851776
MAB_0007	5.72482	11.9641	1.21705	8.45794	8.24893	7.8483	8.81746	0.969165	4.65334	3.71904	0.571607	0	0.185329	1.03173	1.26187
MAB_0008	2.03174	8.18872	1.26535	4.70102	4.71888	3.91757	5.15721	1.23963	4.62751	3.19023	0.398297	0	0.154293	1.11106	1.23084
MAB_0009	5.5206	10.1176	0.877634	7.50642	7.57804	6.93575	8.00634	1.07058	4.65663	3.39916	0.0349398	0	-0.138152	1.01579	0.938392
MAB_0010c	5.4987	10.357	0.900875	8.37658	8.18793	7.70715	9.00207	1.29492	4.65771	2.83453	0.170524	0	-0.128942	1.02982	0.947603
MAB_0011c	3.25153	8.76227	0.815867	6.3044	6.22962	5.81646	6.83052	1.01407	4.65502	4.60343	-0.0128905	0	-0.21326	1.02913	0.863285
MAB_0012c	3.99904	10.9839	1.0481	8.39441	8.22956	7.81572	9.00367	1.18795	4.65558	5.29483	-0.0279542	0	0.0178533	1.03025	1.0944
MAB_0013c	3.2514	7.89283	0.850848	5.7733	5.83737	5.25862	6.31589	1.05727	4.65226	3.80826	-0.479744	0	-0.19508	1.04593	0.881465
MAB_0014	1.34637	6.6767	1.06511	3.33999	3.30448	2.64813	3.94444	1.29631	4.61372	3.30996	0.574382	0	-0.14615	1.21126	0.930394
MAB_0015	2.65563	6.90884	0.867017	4.47	4.50936	3.91479	4.96503	1.05024	4.64469	2.99767	0.182861	0	-0.261263	1.12828	0.815282
MAB_0016	5.34405	8.35255	0.601343	6.59155	6.54949	6.22389	6.90854	0.684648	4.65935	3.29055	0.429835	0	-0.420601	1.02194	0.655943
MAB_0017	2.55188	5.51747	0.631373	4.09202	4.02358	3.70908	4.46076	0.751677	4.65165	2.70847	0.218329	0	-0.526211	1.15758	0.550333
MAB_0018c	2.71522	8.32835	0.996387	4.92075	4.70766	4.30289	5.2683	0.965412	4.64404	4.43385	1.04014	0	-0.0991567	1.09554	0.977388
MAB_0019	6.01344	10.7364	0.794009	9.26092	9.28942	8.86394	9.66441	0.800476	4.65967	5.35965	-0.978881	0	-0.255111	1.04912	0.821433
MAB_0020	6.97079	12.2524	0.924463	9.22663	9.20505	8.76694	9.71886	0.951918	4.65845	3.86958	0.0582375	0	-0.123698	1.04816	0.952846
MAB_0022c	2.90306	8.80989	1.63954	5.24255	5.31554	3.72118	6.53251	2.81134	4.61495	1.91424	0.264256	0	0.566796	1.07275	1.64334
MAB_0023	3.47385	8.36831	1.24067	6.25485	6.5746	4.96919	7.10571	2.13652	4.64347	1.8714	-0.177364	0	0.21029	1.03038	1.28683
MAB_0024c	4.74929	9.94021	0.981069	7.26041	7.32483	6.65617	7.89023	1.23405	4.65429	3.07977	-0.0351712	0	-0.0334268	1.0145	1.04312
MAB_0025	4.5978	12.0152	1.30519	9.37168	9.34619	8.66019	10.1709	1.51072	4.65352	3.67076	-0.379983	0	0.252835	1.05235	1.32938
MAB_0026	6.11052	12.3016	0.952056	10.0044	10.0237	9.50344	10.6237	1.12023	4.65884	4.86104	-0.542669	0	-0.122322	1.07438	0.954222
MAB_0027c	4.90818	9.60297	1.04996	7.03818	6.99392	6.37642	7.58505	1.20862	4.65251	2.83716	0.375221	0	0.035736	1.01423	1.11228
MAB_0028c	1.49359	8.81276	1.0164	6.17844	6.19891	5.67289	6.61506	0.942171	4.64906	7.03153	-0.426766	0	-0.0158967	1.03229	1.06065
MAB_0029c	1.56007	7.72319	1.18455	5.28031	5.13901	4.59294	6.31216	1.71923	4.63742	3.00252	-0.150156	0	0.114272	1.07028	1.19082
MAB_0030	0	8.46946	1.25107	1.74728	1.56985	1.06624	2.14954	1.08331	4.45101	16.4219	2.91722	0.0471698	-0.0547981	1.30587	1.02175
MAB_0031	2.63512	7.14272	0.790917	5.40199	5.47265	4.93681	5.93961	1.0028	4.65241	3.41894	-0.495724	0	-0.271995	1.06291	0.804549
MAB_0032	4.76518	8.82804	0.849112	6.53024	6.43628	6.00099	6.83166	0.830671	4.65527	3.78225	0.77815	0	-0.174321	1.02343	0.902224
MAB_0033c	3.89105	9.45363	0.73664	7.8853	7.93357	7.40833	8.34964	0.941311	4.65883	9.56069	-1.48139	0	-0.281639	1.01828	0.794906
MAB_0034c	3.36258	10.2793	1.03674	8.46801	8.77487	7.65166	9.223	1.57134	4.65545	6.76388	-1.23067	0	0.00478588	1.03195	1.08133
MAB_0035c	2.20405	9.41512	1.11337	6.67703	6.77685	5.93499	7.34364	1.40864	4.64876	4.35575	-0.665629	0	0.0934225	1.01995	1.16997
MAB_0036c	2.80305	9.71423	1.16571	7.75273	7.93806	7.15346	8.66359	1.51012	4.65123	5.46831	-1.21024	0	0.149193	1.01652	1.22574
MAB_0037c	5.59289	10.1032	0.917157	8.38418	8.60597	7.84942	9.00227	1.15284	4.65735	2.96698	-0.569786	0	-0.112844	1.03	0.9637
MAB_0038c	6.22248	11.5531	0.944382	9.69425	10.0323	9.00692	10.3847	1.37777	4.65857	3.78315	-0.882529	0	-0.1185	1.06288	0.958045
MAB_0039c	7.37899	12.6947	0.994813	10.5981	10.5504	10.1144	11.2488	1.13438	4.65897	3.6375	-0.58407	0	-0.104521	1.09933	0.972023
MAB_0042	4.02576	7.74442	0.687727	6.25238	6.13382	5.86968	6.7757	0.906022	4.65738	3.30933	-0.124928	0	-0.342718	1.03044	0.733827
MAB_0043	0.847642	6.90658	0.738694	4.85315	4.98752	4.53895	5.21697	0.678027	4.64996	11.4566	-1.77022	0	-0.36166	1.10035	0.714884
MAB_0044	2.89284	7.21103	0.714876	5.77825	5.8412	5.31128	6.31094	0.999656	4.65552	4.3138	-0.745994	0	-0.330849	1.04573	0.745695
MAB_0045	4.15772	9.80375	0.793543	6.43349	6.36391	5.97849	6.81891	0.840427	4.65617	7.6224	1.26911	0	-0.232304	1.02585	0.84424
MAB_0047	1.48176	6.92364	1.30503	3.89537	3.72741	2.86444	4.94237	2.07793	4.60656	2.11187	0.161852	0	0.132496	1.17254	1.20904
MAB_0048	0	5.24993	1.32145	2.89408	2.99378	2.18435	3.95039	1.76604	4.52875	2.60469	-0.500916	0.0471698	0.0821374	1.23931	1.15868
MAB_0049	0	5.15563	1.12162	2.93716	2.89423	2.19747	3.80181	1.60433	4.57942	2.74934	-0.182989	0.0188679	-0.115067	1.23669	0.961477
MAB_0050c	0	10.0911	1.85286	3.56345	3.02289	2.52485	4.36858	1.84373	4.53821	5.82138	1.41344	0.00943396	0.656591	1.19627	1.73314
MAB_0051	0.928852	7.83039	1.49819	3.73146	3.36567	2.63632	4.62776	1.99143	4.58507	3.05746	0.657171	0	0.313697	1.1845	1.39024
MAB_0052	0	3.22998	0.842218	1.42407	1.57057	0.61547	2.09727	1.4818	4.4688	2.00577	0.146355	0.00943396	-0.482554	1.32477	0.593991
MAB_0053c	0	6.02302	0.820672	3.29707	3.27233	2.86951	3.594	0.724497	4.62906	5.92436	0.128282	0.00943396	-0.393387	1.21406	0.683158
MAB_0054c	0	4.35363	0.782567	2.631	2.5918	2.13008	3.22223	1.09215	4.61444	3.33543	-0.130972	0.00943396	-0.472432	1.255	0.604112
MAB_0055c	3.82613	8.50154	0.741905	6.39714	6.52932	5.9584	6.82182	0.863424	4.65664	4.38518	-0.271253	0	-0.284863	1.02677	0.791682
MAB_0056c	4.87643	9.48832	0.579122	7.70799	7.76025	7.37581	8.07306	0.697252	4.66055	7.81839	-0.994259	0	-0.437057	1.01618	0.639487
MAB_0057	1.61518	6.75675	1.33476	4.13115	4.19403	3.02057	5.24285	2.22228	4.61065	1.85928	0.114822	0	0.180206	1.15456	1.25675
MAB_0058c	3.28247	9.81787	0.90648	7.98578	8.16647	7.71836	8.41035	0.691984	4.65646	9.13192	-1.73058	0	-0.113729	1.02021	0.962816
MAB_0060	0.813164	7.66321	1.07365	3.648	3.69606	3.08188	4.29592	1.21404	4.6189	5.18939	0.350624	0	-0.116759	1.1904	0.959785
MAB_0061	2.10359	6.44731	0.866536	4.34176	4.36683	3.83673	4.85944	1.0227	4.64299	2.79913	-0.230241	0	-0.271635	1.13817	0.804909
MAB_0062	5.41958	8.23372	0.598475	7.0963	7.12055	6.80085	7.39061	0.589758	4.65987	3.14716	-0.319678	0	-0.415611	1.01409	0.660934
MAB_0063c	2.55876	8.40177	1.00644	4.21373	4.01904	3.60809	4.54255	0.934451	4.63777	7.97352	1.81279	0	-0.141699	1.14814	0.934845
MAB_0064c	6.56951	10.1707	0.648501	8.25944	8.40745	7.97633	8.68199	0.705656	4.66033	3.45416	-0.569206	0	-0.378364	1.02686	0.69818
MAB_0065c	6.3114	10.4765	0.660248	8.53851	8.47219	8.13662	8.85086	0.714239	4.66046	4.34138	-0.115973	0	-0.373169	1.03342	0.703375
MAB_0066c	1.75515	6.13691	0.708494	3.69298	3.61465	3.27858	4.03053	0.75195	4.6454	4.11502	0.536115	0	-0.478742	1.18724	0.597803
MAB_0067	0	9.4168	1.63891	4.21881	3.85683	3.30214	5.11482	1.81268	4.5835	4.55563	0.651627	0.0188679	0.491165	1.14774	1.56771
MAB_0068	4.87641	11.6919	1.34616	6.96991	6.78213	5.9901	7.65213	1.66203	4.64578	4.53438	1.03571	0	0.331497	1.01466	1.40804
MAB_0069	5.38255	11.0449	1.27029	7.50245	7.37458	6.49874	8.28515	1.78641	4.6495	2.94623	0.546496	0	0.25452	1.01577	1.33106
MAB_0070	3.31488	8.79791	0.887792	4.7852	4.58143	4.16687	5.1812	1.01433	4.64779	8.55997	1.89908	0	-0.21729	1.10508	0.859254
MAB_0071c	3.9154	7.53277	0.586686	5.26167	5.1886	4.8987	5.42063	0.521928	4.65753	5.76889	1.36852	0	-0.484803	1.07149	0.591742
MAB_0072c	0.390795	5.31143	1.06928	2.57467	2.54387	1.78244	3.19832	1.41589	4.57828	2.88983	0.572625	0	-0.189021	1.2583	0.887523
MAB_0073c	0	7.28585	1.23751	3.8661	3.97743	3.18358	4.63954	1.45596	4.60636	3.51064	-0.149622	0.00943396	0.0627969	1.17471	1.13934
MAB_0074c	2.26854	7.65122	1.23906	4.71109	4.59023	3.60128	5.63058	2.0293	4.62975	2.56738	0.496808	0	0.128724	1.11033	1.20527
MAB_0075	0.700457	6.23844	1.13112	3.36878	3.51655	2.61067	4.16777	1.5571	4.60303	2.84334	-0.116266	0	-0.0782479	1.20937	0.998297
MAB_0076	3.3574	7.64237	0.702331	5.19019	5.18687	4.69352	5.62968	0.93615	4.65441	4.08697	0.359067	0	-0.373958	1.07629	0.702586
MAB_0077	2.68307	7.36989	0.768292	4.44872	4.4114	3.89829	4.93796	1.03967	4.64891	4.20728	0.594437	0	-0.361618	1.12991	0.714926
MAB_0078	0.727609	5.66053	1.0174	2.81966	2.85225	2.16638	3.33102	1.16464	4.59822	3.23177	0.455546	0	-0.226396	1.2438	0.850149
MAB_0080c	1.05421	6.37228	0.814237	3.95174	3.87717	3.46	4.2679	0.8079	4.64194	4.65219	0.260023	0	-0.354074	1.16831	0.722471
MAB_0081	0	6.97049	1.45453	3.58468	3.64989	2.594	4.65423	2.06022	4.56801	2.67524	-0.281867	0.00943396	0.25972	1.19481	1.33626
MAB_0082c	5.54103	9.29081	0.723411	6.79041	6.62785	6.29632	7.1862	0.88988	4.65796	3.64184	0.87273	0	-0.294089	1.0175	0.782456
MAB_0083	1.22245	6.83154	0.914188	3.21479	3.21115	2.66509	3.6673	1.00221	4.62431	5.23254	0.82748	0	-0.305173	1.21936	0.771372
MAB_0084	4.23367	8.09433	0.5404	5.95278	5.93298	5.63519	6.18664	0.551452	4.6594	5.73841	0.570929	0	-0.498682	1.03908	0.577862
MAB_0085c	0	3.98024	0.586223	1.67738	1.63336	1.29438	2.03589	0.741508	4.59984	4.70223	0.537103	0.00943396	-0.723692	1.30991	0.352853
MAB_0086	1.46908	7.31584	0.836344	4.50774	4.43433	4.01594	4.90275	0.886806	4.64628	5.0882	0.430331	0	-0.289058	1.1254	0.787486
MAB_0087c	3.87708	8.06745	0.734431	5.47184	5.42497	5.01276	5.76571	0.752953	4.65472	4.4793	0.775741	0	-0.324767	1.0592	0.751777
MAB_0088c	7.45695	10.0795	0.591559	9.00017	9.13272	8.70414	9.39433	0.690185	4.66126	3.08926	-0.750359	0	-0.450796	1.04235	0.625748
MAB_0089c	4.27109	8.42157	0.676755	6.89651	6.88863	6.46538	7.38177	0.916389	4.65853	4.43795	-0.670214	0	-0.338773	1.01553	0.737771
MAB_0090c	5.05378	7.9931	0.679368	6.44669	6.2395	6.0251	6.9012	0.876104	4.65804	2.68316	0.640435	0	-0.346146	1.02551	0.730398
MAB_0091	7.85725	11.7796	0.813253	10.0422	10.1699	9.75792	10.4921	0.734181	4.66012	3.36872	-0.64301	0	-0.262608	1.07586	0.813936
MAB_0092	6.13596	10.8709	0.941893	9.15001	9.25123	8.8136	9.76161	0.948012	4.65799	3.7856	-0.899524	0	-0.104199	1.04609	0.972345
MAB_0093	4.17452	8.889	1.33649	6.35859	6.11542	5.13685	7.49022	2.35337	4.64164	1.7448	0.229744	0	0.308743	1.02775	1.38529
MAB_0094c	4.23783	8.44708	1.00338	6.12803	6.1132	5.28166	6.85057	1.56892	4.6502	2.33994	0.24079	0	-0.0302172	1.0336	1.04633
MAB_0095	2.05973	8.46056	1.15534	3.64092	3.46816	2.90342	4.07643	1.17302	4.61843	6.99738	1.62529	0	-0.035562	1.1909	1.04098
MAB_0096	4.4534	7.56922	0.686017	6.19119	6.25912	5.58209	6.75719	1.1751	4.65733	2.24816	-0.000336961	0	-0.345961	1.03198	0.730583
MAB_0097	3.07609	8.36296	0.97271	5.52003	5.34321	4.86871	6.09025	1.22154	4.6485	3.54949	0.765826	0	-0.0841903	1.0569	0.992354
MAB_0098	1.0885	5.88038	0.931485	3.65891	3.51835	3.08582	4.20369	1.11787	4.63057	2.89683	0.14089	0	-0.258154	1.18964	0.818391
MAB_0099	3.02896	7.88587	0.987192	5.5722	5.7164	5.14494	6.24173	1.09679	4.64704	3.11112	-0.610372	0	-0.0673697	1.05456	1.00917
MAB_0100	1.43958	6.79033	0.829646	4.51258	4.4423	4.12077	5.04442	0.923655	4.64568	4.68191	-0.413079	0	-0.295388	1.12503	0.781156
MAB_0101	1.93529	7.21519	0.831665	4.83257	4.81478	4.45483	5.25256	0.797728	4.64814	4.55412	-0.286544	0	-0.270132	1.1018	0.806413
MAB_0102	0	6.60296	1.0684	3.96129	4.14111	3.21702	4.62084	1.40383	4.62036	4.49535	-0.693418	0.00943396	-0.0991913	1.16759	0.977353
MAB_0103	5.90605	11.408	1.36046	8.11722	7.71027	7.15911	9.01129	1.85217	4.64984	2.31805	0.580329	0	0.337213	1.02325	1.41376
MAB_0104	4.55952	8.7314	0.938388	6.73295	6.65679	6.07391	7.3129	1.23899	4.65384	2.5469	0.234376	0	-0.0803218	1.01871	0.996223
MAB_0105c	6.6432	9.38389	0.483608	7.95897	7.91175	7.59156	8.29542	0.703865	4.66162	3.25592	0.354764	0	-0.536045	1.01965	0.5405
MAB_0106c	8.65509	12.1295	0.581468	10.0524	9.98746	9.59897	10.4866	0.887633	4.66179	3.34019	0.476484	0	-0.494796	1.07626	0.581749
MAB_0107c	6.26759	11.2393	0.617448	8.82914	8.92547	8.56108	9.1582	0.597124	4.66099	6.72564	-0.232282	0	-0.421166	1.03861	0.655378
MAB_0108c	4.29226	10.4638	1.23197	7.41541	7.53183	6.56719	8.29416	1.72697	4.64956	2.66295	-0.0417139	0	0.216603	1.01536	1.29315
MAB_0109c	7.3744	11.1778	0.840622	9.67339	9.84532	9.2674	10.2497	0.982339	4.65959	3.31667	-0.845857	0	-0.221533	1.06215	0.855012
MAB_0110c	4.12173	9.04845	0.770779	7.54498	7.6662	7.12152	8.03714	0.915624	4.65802	5.39989	-1.08633	0	-0.245122	1.0159	0.831423
MAB_0111c	4.76759	9.69738	0.73081	8.18421	8.30754	7.72195	8.61332	0.89137	4.65934	6.23514	-0.915472	0	-0.294125	1.02493	0.78242
MAB_0112	7.23076	12.2231	1.0098	9.9984	10.1636	9.32912	10.6499	1.32075	4.65831	2.54806	-0.326651	0	-0.0643432	1.07414	1.0122
MAB_0113	5.51239	8.21334	0.546001	6.82737	6.8553	6.4797	7.16845	0.688743	4.66027	2.91356	0.0945401	0	-0.470759	1.01676	0.605786
MAB_0114	5.86346	10.6644	0.835079	7.53774	7.41099	7.15686	7.74687	0.590011	4.65767	7.27916	1.71228	0	-0.180804	1.01588	0.89574
MAB_0115c	5.66892	13.0247	1.27969	8.85117	8.70093	8.00182	9.6148	1.61299	4.65336	4.53378	0.841761	0	0.240629	1.03906	1.31717
MAB_0116	0	7.92824	1.1696	4.20998	4.17592	3.59542	4.84759	1.25217	4.61902	5.57425	-0.115376	0.00943396	0.02117	1.14843	1.09771
MAB_0117c	0	9.56626	1.23358	6.91234	6.71551	6.20159	7.64528	1.44369	4.64324	11.0938	-1.23729	0.00943396	0.218278	1.0153	1.29482
MAB_0118c	0	12.6077	1.46479	10.8656	11.1466	10.4113	11.7214	1.31009	4.64963	29.8851	-4.07526	0.00943396	0.35327	1.11152	1.42981
MAB_0119c	0	10.1653	1.43725	8.17752	8.49558	7.95064	9.00028	1.04964	4.64271	12.0059	-2.34488	0.00943396	0.412482	1.02476	1.48903
MAB_0120	6.56436	9.63032	0.716939	7.93485	7.87425	7.38624	8.50123	1.11499	4.65942	2.30713	0.292982	0	-0.302238	1.01918	0.774306
MAB_0121	4.69947	9.3592	0.899498	6.84931	6.75362	6.44136	7.30591	0.864549	4.65484	3.74157	0.0981754	0	-0.116838	1.01634	0.959707
MAB_0122	6.39324	9.6107	0.565939	8.23124	8.20189	7.90723	8.43999	0.532763	4.6611	3.9947	0.249155	0	-0.460201	1.02614	0.616344
MAB_0123	6.59451	9.36293	0.688151	7.94732	7.85472	7.39933	8.6126	1.21327	4.65972	1.81688	0.0110335	0	-0.331269	1.01942	0.745275
MAB_0124	4.71709	8.67247	0.700926	6.2927	6.2825	6.02869	6.61202	0.583326	4.65733	4.67496	0.382241	0	-0.328498	1.02942	0.748046
MAB_0125c	5.66842	10.1227	1.0499	7.73227	7.7007	6.91986	8.57222	1.65237	4.6543	2.16914	0.134761	0	0.0335568	1.01635	1.1101
MAB_0126c	8.25005	13.2442	1.35878	10.8871	11.4371	9.49187	11.8556	2.36378	4.65555	1.89857	-0.41161	0	0.246271	1.11251	1.32282
MAB_0127c	4.60568	10.2257	0.969611	8.73059	8.92653	8.19712	9.38781	1.1907	4.65698	5.40178	-1.18549	0	-0.0671154	1.03673	1.00943
MAB_0128c	2.93423	6.55236	0.690103	5.36154	5.50044	5.00931	5.84361	0.834301	4.65483	3.79072	-0.84008	0	-0.375144	1.06525	0.701401
MAB_0129c	0	7.32963	1.04076	5.06589	5.21917	4.64625	5.73107	1.08482	4.63643	8.53376	-1.60133	0.00943396	-0.0443028	1.08506	1.03224
MAB_0130	6.26951	11.4102	0.804462	7.80169	7.76108	7.30473	8.24415	0.939422	4.65838	8.44512	1.50328	0	-0.212586	1.01705	0.863958
MAB_0131c	0	6.2905	1.31369	3.34845	3.73903	2.62156	4.21637	1.59481	4.56746	2.9681	-0.691611	0.0188679	0.102982	1.21071	1.17953
MAB_0132	5.30579	11.1911	0.926971	7.38474	7.43115	6.95796	7.90198	0.944017	4.65579	6.48466	0.809214	0	-0.0882186	1.01519	0.988326
MAB_0133	4.25148	7.97107	0.606409	6.66181	6.78867	6.36199	6.99149	0.629502	4.65916	5.53605	-1.10295	0	-0.413888	1.0203	0.662656
MAB_0134c	4.65542	7.76761	0.539157	6.67311	6.76094	6.45545	7.04	0.584548	4.6601	4.68623	-1.01618	0	-0.480883	1.02004	0.595662
MAB_0136	1.79026	7.09962	1.2204	4.56871	4.70872	3.53999	5.52319	1.98321	4.62612	2.30144	-0.263025	0	0.0996054	1.1208	1.17615
MAB_0137	0.931759	5.82121	0.980047	3.66021	3.83583	3.12891	4.32552	1.19661	4.6245	2.8045	-0.567402	0	-0.209501	1.18955	0.867043
MAB_0138	5.10748	8.54365	0.58286	7.34224	7.28076	6.9555	7.76201	0.806507	4.66028	4.0723	-0.295739	0	-0.432084	1.01494	0.644461
MAB_0139c	1.86886	7.58649	0.759237	5.7433	5.70193	5.40012	6.04753	0.647412	4.65412	8.84396	-0.853722	0	-0.287927	1.04716	0.788618
MAB_0140c	4.29074	8.21194	0.624383	6.29622	6.27249	5.95464	6.62379	0.669155	4.65853	3.9206	-0.0428466	0	-0.404951	1.02933	0.671593
MAB_0141c	0	5.94726	0.770771	3.83262	3.80158	3.4468	4.15891	0.712109	4.63875	8.57245	-0.852052	0.00943396	-0.406404	1.17717	0.670141
MAB_0142c	2.42511	7.28127	0.880747	5.79237	5.86837	5.32255	6.29392	0.971365	4.65107	5.32636	-1.00758	0	-0.164406	1.04515	0.912138
MAB_0143c	3.0117	7.33639	0.742348	5.39418	5.46496	4.9054	5.91775	1.01235	4.65382	3.42204	-0.290378	0	-0.321005	1.06335	0.755539
MAB_0144c	3.24672	8.42639	0.894027	5.44254	5.32755	4.83692	6.19345	1.35653	4.64989	3.28352	0.0116165	0	-0.166678	1.0607	0.909867
MAB_0145c	3.95442	8.24603	0.989886	6.07177	5.7795	5.35861	6.76315	1.40454	4.65057	2.38435	0.59643	0	-0.0453197	1.03521	1.03122
MAB_0146	0	8.72957	1.98683	4.58629	5.49613	2.89146	6.16651	3.27505	4.55351	2.08929	-0.356739	0.0188679	0.867347	1.11948	1.94389
MAB_0147c	6.42759	12.3542	1.19527	8.80044	8.69182	7.83162	9.53468	1.70306	4.65451	3.21805	0.700513	0	0.157228	1.03804	1.23377
MAB_0148c	7.38358	13.2367	1.17661	9.78505	9.63693	8.89369	10.6033	1.70961	4.65639	2.98543	0.544211	0	0.11049	1.06612	1.18703
MAB_0149c	5.24255	10.876	1.25485	7.73473	7.5974	6.84603	8.64994	1.80391	4.65056	2.62715	0.418031	0	0.23848	1.01637	1.31502
MAB_0150c	3.08449	8.23783	1.22133	5.84496	5.77037	5.01033	7.0402	2.02987	4.64136	2.31478	-0.0308216	0	0.178254	1.04307	1.2548
MAB_0151c	4.26559	9.58721	1.35049	7.65607	7.98966	6.8009	8.73852	1.93762	4.64709	2.61728	-0.753227	0	0.334522	1.01597	1.41107
MAB_0152	3.64239	10.1028	0.790167	5.87959	6.0025	5.55179	6.21205	0.660258	4.65493	13.776	1.81316	0	-0.25158	1.04175	0.824964
MAB_0153	4.59186	8.74727	0.758229	7.07261	7.15669	6.42071	7.55677	1.13606	4.65766	3.16004	-0.249965	0	-0.255891	1.01412	0.820654
MAB_0154	5.40231	9.6592	0.800358	7.97316	8.07952	7.50324	8.39736	0.894125	4.65835	3.32196	-0.435315	0	-0.219586	1.01994	0.856958
MAB_0155	3.07957	8.29908	1.13169	5.43393	5.35855	4.79874	6.01328	1.21455	4.64193	3.3385	0.319988	0	0.0705308	1.06116	1.14708
MAB_0156c	5.79335	11.0882	1.19925	7.67041	7.26426	6.95722	8.31237	1.35515	4.65177	3.29337	0.924824	0	0.183246	1.01601	1.25979
MAB_0157	1.64548	5.70255	0.646906	3.78495	3.72687	3.38601	4.28023	0.894226	4.64845	4.11763	-0.208614	0	-0.533743	1.18065	0.542802
MAB_0158c	2.04727	8.26107	0.756551	4.92233	4.9287	4.58797	5.2109	0.622932	4.65166	8.88251	0.542428	0	-0.33888	1.09543	0.737665
MAB_0159	2.06461	8.4856	1.07023	4.46242	4.309	3.7852	4.97795	1.19275	4.63605	4.66345	0.938778	0	-0.0586336	1.12886	1.01791
MAB_0160	1.34195	6.24341	0.929932	3.28421	3.07929	2.53885	4.05843	1.51958	4.62447	3.20615	0.594443	0	-0.284962	1.21489	0.791582
MAB_0161	3.22279	7.87902	0.703641	4.70185	4.60541	4.35584	4.93305	0.577216	4.65294	8.68115	1.58935	0	-0.407356	1.111	0.669189
MAB_0162c	1.14569	6.00547	0.895718	2.97689	2.94075	2.29694	3.42862	1.13167	4.62001	4.04374	0.793993	0	-0.338538	1.23426	0.738007
MAB_0163c	3.64491	10.8982	1.63823	6.88828	6.2184	5.60543	8.05504	2.44961	4.63663	2.64199	0.812614	0	0.622572	1.01565	1.69912
MAB_0164	2.25443	8.34899	0.973888	6.64541	6.76042	6.0856	7.39597	1.31037	4.65191	5.67622	-1.0767	0	-0.0467875	1.02068	1.02976
MAB_0165	8.73349	13.6228	0.658949	10.9186	10.9801	10.696	11.1218	0.425827	4.66164	7.24673	0.429991	0	-0.455029	1.11398	0.621515
MAB_0166	3.22485	6.88816	0.638872	5.34001	5.32892	5.02303	5.69056	0.667532	4.65627	3.54209	-0.0716151	0	-0.427666	1.06654	0.648879
MAB_0167	3.48668	6.27149	0.584162	5.00737	5.06821	4.64714	5.36651	0.719369	4.65657	2.71895	-0.333052	0	-0.505126	1.08929	0.571419
MAB_0168c	4.45985	9.7439	0.94478	8.0441	8.34369	7.45839	8.65564	1.19725	4.65629	3.76905	-0.921496	0	-0.0767219	1.0215	0.999823
MAB_0169c	8.27195	14.7439	1.3889	12.3812	12.5759	11.4568	13.2117	1.75498	4.65709	2.7623	-0.342123	0	0.20528	1.18362	1.28182
MAB_0170	1.86137	7.49308	0.91581	5.46134	5.58387	4.8489	6.18095	1.33205	4.64861	4.05185	-0.674789	0	-0.143919	1.05973	0.932625
MAB_0171	3.5059	9.3238	1.06822	7.49113	7.87291	6.85351	8.33035	1.47683	4.65273	3.68593	-0.999147	0	0.0524912	1.01573	1.12904
MAB_0172	0	7.25083	1.44572	4.83034	5.03575	3.94562	5.8198	1.87418	4.61055	3.38094	-0.758427	0.00943396	0.343771	1.10195	1.42032
MAB_0173	3.68288	10.0599	1.22613	8.15017	8.36541	7.77621	8.99365	1.21744	4.651	5.83384	-1.59379	0	0.202058	1.02407	1.2786
MAB_0174	3.75648	8.78436	1.03373	7.0121	7.11422	6.59914	7.80023	1.20109	4.65184	4.27171	-1.1827	0	0.019375	1.01435	1.09592
MAB_0175	5.51763	12.1202	1.19659	10.1189	10.247	9.39357	10.909	1.5154	4.65622	3.94363	-0.790833	0	0.117666	1.07892	1.19421
MAB_0176	5.38741	14.0959	1.265	11.1475	11.2052	10.623	12.0623	1.43936	4.65668	6.6404	-1.09529	0	0.140233	1.12476	1.21678
MAB_0177	6.65392	13.762	1.1421	11.3584	11.314	10.9489	12.1814	1.23249	4.65821	5.71184	-0.991131	0	0.00724662	1.13486	1.08379
MAB_0178	5.45252	9.96425	0.900996	8.21379	8.10783	7.50446	8.94916	1.4447	4.65741	2.52591	-0.158898	0	-0.124696	1.02569	0.951849
MAB_0179	7.51459	11.313	0.657687	9.95362	9.92314	9.51613	10.3795	0.86337	4.66125	3.80687	-0.402123	0	-0.414726	1.07241	0.661818
MAB_0180	6.26068	13.0512	1.26778	11.2477	11.3509	10.9456	12.138	1.19232	4.65652	8.14768	-2.03589	0	0.138241	1.12954	1.21479
MAB_0181	8.44365	12.3546	0.754277	10.8146	11.0371	10.5835	11.248	0.664464	4.66096	4.0009	-1.01479	0	-0.354884	1.10916	0.721661
MAB_0182c	1.56389	10.2714	1.58388	5.7266	5.58872	4.7478	6.92934	2.18154	4.62456	3.07771	0.189771	0	0.536021	1.04786	1.61257
MAB_0183c	2.84337	11.3022	2.29916	7.20604	6.45063	5.41558	9.57513	4.15956	4.61365	1.88824	0.407374	0	1.2849	1.01426	2.36144
MAB_0184c	0	10.9671	2.55638	4.68215	4.19126	3.06445	4.87294	1.80849	4.52592	3.26669	1.07789	0.00943396	1.44396	1.11242	2.5205
MAB_0185c	6.5317	11.9918	0.942866	10.1923	10.3106	9.67446	10.8529	1.1784	4.65907	4.26753	-0.801335	0	-0.139036	1.0819	0.937508
MAB_0186c	5.18625	11.4438	1.08071	9.2748	9.38824	8.32128	10.1361	1.81485	4.65652	3.4088	-0.50695	0	0.0311974	1.04951	1.10774
MAB_0187	1.21022	4.50084	0.753391	3.22472	3.38422	2.67435	3.77954	1.10519	4.63478	2.46678	-0.408387	0	-0.465334	1.21873	0.61121
MAB_0188c	1.31672	6.13483	0.719341	3.50585	3.53481	3.13943	3.99283	0.853399	4.64151	4.66778	-0.214244	0	-0.480864	1.20021	0.59568
MAB_0189c	5.78127	9.81701	0.881392	8.32223	8.51537	7.7875	8.96537	1.17788	4.65775	2.56846	-0.544704	0	-0.147074	1.02847	0.92947
MAB_0190c	3.34495	9.73325	0.951963	7.32022	7.62172	6.71068	8.01501	1.30433	4.65461	4.786	-0.829972	0	-0.0628536	1.01482	1.01369
MAB_0191c	5.30199	10.398	1.13783	8.66916	9.03401	7.9281	9.45153	1.52343	4.65432	4.28425	-1.21769	0	0.102173	1.03565	1.17872
MAB_0192c	2.63338	8.09613	1.00753	6.48561	6.86478	5.82464	7.19397	1.36933	4.65062	3.8409	-0.991197	0	-0.0170043	1.02454	1.05954
MAB_0193c	0	6.41998	0.96396	3.40802	3.46452	2.96858	4.03207	1.0635	4.61232	6.10511	-0.826815	0.0188679	-0.242813	1.20677	0.833732
MAB_0194	4.33454	8.34258	0.732707	6.06327	5.97567	5.61676	6.5618	0.945039	4.6562	3.28809	0.161014	0	-0.302754	1.03546	0.77379
MAB_0195c	1.02199	9.15771	1.8284	3.47901	2.94768	2.29903	4.03821	1.73918	4.54273	4.65684	1.42059	0	0.626383	1.20202	1.70293
MAB_0196c	1.68437	5.67109	0.819301	3.42879	3.33843	2.86059	3.97088	1.11029	4.63475	2.70382	0.145402	0	-0.386089	1.20539	0.690456
MAB_0197	1.90262	7.83786	1.31613	5.35529	5.50746	4.50134	6.2237	1.72236	4.63205	2.6888	-0.204077	0	0.250511	1.06562	1.32706
MAB_0198	7.10159	10.6935	0.67141	8.646	8.55056	8.18193	9.09169	0.909759	4.66047	3.0449	0.280181	0	-0.36386	1.03527	0.712685
MAB_0199	6.45004	9.25371	0.475104	7.98126	7.93458	7.75827	8.25507	0.496801	4.66168	3.54785	0.133646	0	-0.54501	1.02011	0.531535
MAB_0200c	3.09865	10.8301	1.00582	7.50631	7.60411	7.00487	8.09948	1.09461	4.6541	6.62042	-0.560364	0	-0.0099697	1.01579	1.06657
MAB_0201c	2.61554	8.70982	0.887181	6.71714	6.7652	6.36927	7.25475	0.885474	4.65412	6.54279	-1.15578	0	-0.131874	1.01905	0.94467
MAB_0202c	3.37961	7.44757	0.66837	6.0319	6.15529	5.60867	6.54765	0.938979	4.65713	4.01967	-0.747397	0	-0.368066	1.03644	0.708479
MAB_0203c	5.19773	9.68735	0.824202	8.21344	8.25941	7.71818	8.96018	1.24199	4.65831	3.61475	-0.624689	0	-0.20148	1.02568	0.875064
MAB_0204c	5.15481	10.357	0.766418	9.14551	9.10351	8.69101	9.78888	1.09788	4.6598	8.21603	-1.24063	0	-0.279556	1.04597	0.796988
MAB_0205c	4.04085	9.60703	0.756487	7.01328	7.01644	6.56442	7.47802	0.913598	4.6576	5.12842	-0.0825297	0	-0.257861	1.01435	0.818683
MAB_0206	6.92334	9.79108	0.624218	8.76112	8.88081	8.29573	9.25371	0.957978	4.66089	2.54375	-0.571599	0	-0.413072	1.03729	0.663472
MAB_0207c	5.68991	8.64389	0.53808	7.13721	7.15029	6.72042	7.45371	0.733288	4.66062	3.18454	0.0612961	0	-0.476014	1.01409	0.600531
MAB_0208	5.28161	9.99545	1.01873	7.00538	6.84451	6.20403	7.41225	1.20822	4.65325	2.81377	0.744924	0	0.00433334	1.0144	1.08088
MAB_0209	2.04699	8.30706	0.928476	4.42568	4.38781	3.72094	4.92972	1.20878	4.64203	5.38617	0.730726	0	-0.203206	1.13168	0.873339
MAB_0210	0	12.3442	1.85497	8.40533	8.54863	8.00748	9.28461	1.27713	4.62985	10.041	-2.08302	0.00943396	0.824463	1.03051	1.90101
MAB_0211	4.57683	8.8425	0.85305	7.18704	7.35829	6.56699	7.82677	1.25979	4.65625	3.00216	-0.559542	0	-0.161149	1.0142	0.915396
MAB_0212	0	9.38962	1.74692	6.39779	6.48421	5.47248	7.50672	2.03424	4.6121	6.39331	-1.2838	0.0283019	0.720165	1.02675	1.79671
MAB_0213c	5.39415	9.17589	1.02063	7.17591	6.98325	6.4627	7.96361	1.50091	4.65351	2.10249	0.338992	0	0.00646245	1.01417	1.08301
MAB_0214c	3.55483	8.96281	0.964831	6.67401	6.60549	6.13524	7.43795	1.30271	4.65291	3.29662	-0.0911167	0	-0.0551878	1.02002	1.02136
MAB_0215	4.28684	11.9125	1.5134	7.02822	6.61779	5.9287	7.5536	1.6249	4.64199	4.35178	1.28657	0	0.499134	1.01427	1.57568
MAB_0216	1.34176	9.14891	1.3764	4.69339	4.38278	3.92235	5.08919	1.16684	4.62248	4.25257	0.928086	0	0.264789	1.11161	1.34133
MAB_0217c	5.86329	11.1457	1.00078	8.88117	9.00236	8.47294	9.45582	0.982887	4.65687	4.80363	-0.870738	0	-0.0389142	1.03969	1.03763
MAB_0218c	5.10236	11.748	1.19356	9.75149	10.1736	9.26266	10.5471	1.28447	4.6555	4.63071	-1.37048	0	0.128654	1.06491	1.2052
MAB_0219	2.72913	8.66617	1.41482	5.36499	5.10085	4.17337	6.3411	2.16773	4.62954	2.37255	0.463289	0	0.349775	1.06504	1.42632
MAB_0220c	4.51835	8.83589	0.73949	7.00386	7.13733	6.70364	7.44115	0.737514	4.65766	5.12972	-1.01709	0	-0.274915	1.0144	0.801629
MAB_0221c	0	9.77637	1.04757	8.75259	8.94459	8.63818	9.22554	0.587366	4.65155	47.5362	-5.80374	0.00943396	0.0104378	1.03713	1.08698
MAB_0222c	0	8.4288	0.984666	6.88629	7.09244	6.67607	7.42896	0.752892	4.6484	24.2816	-3.5655	0.00943396	-0.0310187	1.01569	1.04553
MAB_0224	0	8.52067	2.19571	3.69199	3.145	2.26399	5.61559	3.3516	4.45403	2.1237	0.169799	0.0849057	1.0084	1.18731	2.08495
MAB_0226	0	8.1176	2.00501	3.72735	3.2459	2.24924	5.23077	2.98153	4.51193	2.22689	0.457347	0.0283019	0.820216	1.18479	1.89676
MAB_0229	0	7.12403	2.15212	2.78231	2.02716	1.23701	4.53279	3.29578	4.34514	2.02673	0.588087	0.0943396	0.906081	1.24604	1.98263
MAB_0230	0	6.38816	1.60272	3.03586	2.72084	1.91875	4.06019	2.14143	4.51915	2.28043	0.432358	0.00943396	0.372102	1.23062	1.44865
MAB_0231	0	5.18799	1.53596	1.68712	1.09776	0.521923	2.70644	2.18452	4.25537	2.52083	0.903637	0.0849057	0.226609	1.30935	1.30315
MAB_0232	0	5.01764	1.36114	1.6895	1.33551	0.568817	2.68426	2.11545	4.32369	2.39695	0.704839	0.0849057	0.0519253	1.30921	1.12847
MAB_0233	0	9.77139	2.5048	4.37934	3.93655	2.27294	6.64917	4.37623	4.49461	1.96406	0.422835	0.0188679	1.36954	1.13526	2.44608
MAB_0235	0	5.71567	1.4785	1.99552	1.52614	0.923471	3.21809	2.29462	4.36873	2.3981	0.620552	0.0849057	0.186883	1.29162	1.26343
MAB_0240	0	6.11435	1.44142	2.16045	2.02673	1.14773	3.31399	2.16626	4.41116	2.59754	0.469377	0.0943396	0.159235	1.28219	1.23578
MAB_0241	0	7.57222	1.59853	3.90381	3.86189	2.75537	4.84438	2.08901	4.56647	2.81715	-0.0353195	0.0283019	0.426624	1.17191	1.50317
MAB_0242	0	12.4427	1.47727	7.59676	7.50985	6.88429	8.48254	1.59826	4.64034	9.73397	-0.77038	0.00943396	0.461306	1.01597	1.53785
MAB_0243	0	11.0836	1.24587	8.88919	8.88683	8.59658	9.56753	0.970942	4.64898	25.8577	-3.44194	0.00943396	0.206003	1.03986	1.28255
MAB_0244	0	9.50464	1.0234	6.94756	6.81151	6.4739	7.59746	1.12356	4.64817	21.7684	-2.53583	0.00943396	0.00851931	1.01488	1.08506
MAB_0245c	0	9.56889	0.909893	6.81424	6.91371	6.59991	7.20973	0.609814	4.64996	31.888	-3.74031	0.00943396	-0.107125	1.01702	0.969419
MAB_0246	5.15007	8.81402	0.819886	6.63102	6.56313	5.96835	7.21907	1.25072	4.6559	2.49579	0.256212	0	-0.201125	1.02101	0.87542
MAB_0247c	2.86873	8.15837	0.741686	5.75342	5.7717	5.34999	6.12545	0.775467	4.65502	5.57851	-0.118278	0	-0.305058	1.04674	0.771487
MAB_0248c	1.8649	7.52774	0.928598	4.32871	4.28788	3.73621	4.73102	0.994811	4.6413	4.59084	0.832682	0	-0.210588	1.13919	0.865957
MAB_0249	0	11.8317	2.4507	2.39024	1.67439	1.04926	2.55143	1.50217	4.25578	7.21619	2.1248	0.0660377	1.1817	1.269	2.25824
MAB_0250	6.2239	12.8835	1.1825	7.70926	7.38829	7.07985	7.93331	0.853452	4.65275	7.77661	2.07644	0	0.166312	1.01619	1.24286
MAB_0251	2.71353	7.11452	0.8763	4.69062	4.74456	4.18694	5.03631	0.849362	4.64627	3.69414	0.435303	0	-0.235508	1.11181	0.841036
MAB_0252	5.48142	9.99274	0.907018	7.66277	7.51299	7.18942	8.02573	0.83631	4.65659	3.73469	0.527541	0	-0.108969	1.01599	0.967576
MAB_0253	3.7175	7.57963	0.796258	5.60578	5.66507	5.14757	6.13222	0.984644	4.65329	2.91889	-0.11394	0	-0.256814	1.05307	0.81973
MAB_0254c	3.53133	6.53926	0.494169	5.37064	5.3787	5.15933	5.64406	0.484728	4.65908	6.34344	-0.938803	0	-0.570541	1.06471	0.506003
MAB_0255	4.00772	7.13831	0.634507	6.1749	6.30081	5.87848	6.64542	0.766938	4.658	3.71629	-0.959831	0	-0.397875	1.03238	0.678669
MAB_0256c	2.49641	6.53095	0.663681	4.84949	4.9026	4.51727	5.21445	0.697184	4.65387	4.44592	-0.357473	0	-0.43693	1.10061	0.639614
MAB_0257c	5.82104	11.1311	0.80436	7.61492	7.55955	7.18081	7.89876	0.717944	4.65811	7.66553	1.36835	0	-0.211599	1.01596	0.864945
MAB_0258c	2.69576	6.71205	0.835917	5.35458	5.45403	4.8823	5.93529	1.05299	4.65065	3.40388	-0.815936	0	-0.229743	1.06566	0.846801
MAB_0259c	2.5111	7.14267	0.908186	5.35606	5.61356	4.80509	5.91698	1.11189	4.64833	3.38765	-0.72239	0	-0.157386	1.06557	0.919158
MAB_0260	1.85701	5.59407	0.739373	3.41015	3.35713	3.0197	3.68233	0.662626	4.64088	4.24871	0.824647	0	-0.467258	1.20663	0.609287
MAB_0261	4.42156	11.1714	0.931178	5.72999	5.59669	5.19778	6.05978	0.861992	4.65189	18.974	3.18481	0	-0.116541	1.04772	0.960004
MAB_0262	2.48194	6.33869	0.8817	4.70559	4.84834	4.0528	5.32458	1.27178	4.64522	2.57304	-0.478606	0	-0.229028	1.11073	0.847517
MAB_0263	0.847462	5.86768	1.11964	4.03825	4.39349	3.09162	4.93564	1.84402	4.62189	2.33578	-0.514031	0	-0.0420865	1.16172	1.03446
MAB_0264	0	7.11845	1.2868	4.7995	4.90605	4.00362	5.83356	1.82994	4.62178	3.6266	-0.638222	0.00943396	0.182713	1.10409	1.25926
MAB_0265	2.49067	7.54879	0.841508	5.56202	5.47126	4.99991	6.14563	1.14572	4.6519	3.77539	-0.0150707	0	-0.213507	1.05502	0.863037
MAB_0266c	3.49595	7.70366	0.673474	5.69195	5.69579	5.32962	6.02672	0.697101	4.65641	4.43884	-0.0591449	0	-0.375854	1.04933	0.700691
MAB_0267	4.71801	8.38568	0.740976	6.26803	6.23464	5.91944	6.49828	0.578847	4.65664	4.29603	0.691658	0	-0.289073	1.03005	0.787471
MAB_0268	3.60344	7.114	0.828964	4.98458	4.8007	4.36652	5.47513	1.10861	4.65013	2.80088	0.71421	0	-0.261973	1.09094	0.814572
MAB_0269c	0	7.36529	1.3672	3.68065	3.60803	2.88425	4.35469	1.47044	4.58449	3.82427	0.1903	0.0283019	0.179088	1.18811	1.25563
MAB_0270c	0	5.05428	0.85871	1.00078	0.822405	0.382544	1.45477	1.07222	4.3071	6.65314	1.48085	0.0943396	-0.491957	1.35067	0.584588
MAB_0271	4.12707	10.3824	0.837637	7.46519	7.51506	7.03822	7.84255	0.804326	4.65709	5.48426	-0.151822	0	-0.177978	1.01562	0.898566
MAB_0272	6.92472	10.1456	0.600618	8.58872	8.65518	8.20331	8.93185	0.728539	4.66101	3.4475	0.0093776	0	-0.433722	1.03434	0.642823
MAB_0273c	2.30805	7.53796	1.21263	5.57244	5.73937	4.64329	6.504	1.86071	4.63838	2.54759	-0.584467	0	0.158077	1.05455	1.23462
MAB_0274c	3.88522	10.7297	0.982344	6.54829	6.64363	6.07228	6.99008	0.917806	4.65225	7.07776	0.400407	0	-0.0406459	1.02299	1.0359
MAB_0275	4.0594	7.7515	0.704974	5.88349	6.07101	5.48577	6.38138	0.895605	4.65611	3.16587	-0.567247	0	-0.336626	1.0416	0.739919
MAB_0276	3.40783	10.6326	1.14484	7.11669	7.01534	6.33182	7.68467	1.35285	4.65068	3.97925	0.410058	0	0.130761	1.01408	1.20731
MAB_0277c	1.1745	7.02687	1.18422	5.24649	5.63829	4.32371	6.02931	1.7056	4.63595	3.19745	-0.632341	0	0.111734	1.07249	1.18828
MAB_0278c	1.10394	6.65784	0.742709	4.95292	5.08218	4.59721	5.35357	0.756359	4.65052	10.1503	-1.84944	0	-0.350517	1.09323	0.726027
MAB_0279c	4.98065	7.63468	0.610578	6.67631	6.86195	6.30266	7.12936	0.826708	4.65917	2.90261	-0.828678	0	-0.409389	1.01997	0.667156
MAB_0280	5.71513	9.00163	0.752034	7.40299	7.37299	6.84375	7.97883	1.13508	4.6583	2.38378	-0.0418987	0	-0.263259	1.01529	0.813285
MAB_0281	4.87985	12.0572	1.20182	8.83084	8.84188	8.27564	9.33137	1.05573	4.65409	5.26778	-0.0446066	0	0.163171	1.03865	1.23972
MAB_0282	4.93935	7.59956	0.604071	6.54396	6.53571	6.09162	7.04055	0.948936	4.65917	2.56716	-0.231302	0	-0.419025	1.0231	0.657519
MAB_0283c	2.82744	10.78	1.22246	7.04052	7.0937	6.22446	7.86708	1.64262	4.64813	4.13822	-0.0288877	0	0.208242	1.01422	1.28479
MAB_0284c	0	7.77576	1.58475	2.57588	2.36255	1.26487	3.6836	2.41873	4.45845	3.57289	0.62021	0.0471698	0.326523	1.25823	1.40307
MAB_0285	3.05612	7.5069	1.04211	5.453	5.47959	4.56017	6.27148	1.71132	4.64496	2.03118	-0.127614	0	-0.0180454	1.06016	1.0585
MAB_0286	0.324613	8.86636	1.47915	2.21044	1.72184	1.17507	2.9184	1.74333	4.47917	8.87648	2.03248	0	0.199818	1.27933	1.27636
MAB_0287	0	9.74482	2.34519	2.9984	2.64828	0.774498	4.92662	4.15212	4.32557	2.48497	0.516789	0.0754717	1.11226	1.23293	2.1888
MAB_0288	0	9.9636	1.95906	2.26476	1.96375	0.684265	3.61705	2.93278	4.30343	5.54115	1.36026	0.0754717	0.682842	1.27622	1.75939
MAB_0289	0	12.8192	2.12285	5.40253	5.13669	3.9902	6.80994	2.81974	4.57719	4.6558	0.410078	0.0283019	1.05997	1.06288	2.13651
MAB_0290	4.51413	12.2676	1.53818	6.67144	6.86386	5.32668	7.81359	2.48691	4.63784	4.18693	0.728835	0	0.518107	1.02008	1.59465
MAB_0291	5.83412	9.74603	0.772187	7.24892	7.29617	6.65246	7.781	1.12854	4.65787	3.29771	0.415201	0	-0.242254	1.01444	0.834291
MAB_0292c	1.01199	8.17441	1.30159	3.47841	3.41438	2.45304	4.26815	1.8151	4.59555	4.17709	0.769988	0	0.0995328	1.20206	1.17608
MAB_0294	2.27799	10.0134	1.72079	5.14649	4.50052	3.81607	6.646	2.82993	4.60996	2.58801	0.661181	0	0.641468	1.07933	1.71801
MAB_0295	0	9.38631	1.59711	2.2956	2.00274	1.34765	2.95704	1.60939	4.44739	8.39286	1.84403	0.0283019	0.322665	1.27445	1.39921
MAB_0296	0	11.7749	1.85757	4.41761	3.90792	3.3181	5.39764	2.07954	4.57575	6.17879	1.17917	0.0188679	0.725267	1.1323	1.80181
MAB_0297	0	12.1793	1.94864	4.62675	4.42304	3.51984	5.40927	1.88943	4.56863	5.95393	0.865057	0.0283019	0.832159	1.11648	1.9087
MAB_0298	1.69702	11.1258	1.50421	4.09056	3.78645	3.12963	4.66443	1.5348	4.60519	9.74899	2.06524	0	0.346518	1.1577	1.42306
MAB_0299	4.30971	10.2218	0.982343	7.14114	6.98173	6.68806	7.46728	0.779218	4.65416	4.45417	0.517294	0	-0.0317556	1.0141	1.04479
MAB_0300c	2.77502	8.27531	1.06178	5.41524	5.23715	4.81685	5.90478	1.08793	4.64474	3.91505	0.642813	0	-0.000395752	1.06218	1.07615
MAB_0301	0	9.27942	1.77623	4.3379	4.38894	2.88898	5.5941	2.70512	4.5734	2.75413	0.142361	0.00943396	0.637759	1.13847	1.7143
MAB_0302	1.12589	8.06125	1.50489	3.95138	3.98797	2.61554	5.153	2.53747	4.58878	2.24326	0.131174	0	0.336556	1.16834	1.4131
MAB_0303	2.8642	8.62314	1.10523	5.4411	5.67561	4.60068	6.2337	1.63302	4.64236	2.76401	-0.165891	0	0.0444542	1.06078	1.121
MAB_0304	2.63789	13.37	2.164	5.67273	4.86028	4.34058	6.37013	2.02955	4.60026	5.6218	1.64216	0	1.11385	1.05015	2.19039
MAB_0305	6.07519	8.9958	0.653641	7.60832	7.77251	7.15296	8.0986	0.945638	4.65974	2.32213	-0.294706	0	-0.362323	1.01596	0.714222
MAB_0306c	3.81763	7.93365	0.79991	6.14126	6.14345	5.74617	6.72108	0.974915	4.65482	2.87943	-0.37982	0	-0.233333	1.03324	0.843212
MAB_0307c	3.57476	8.61294	0.900078	5.1891	5.15425	4.7484	5.5097	0.761302	4.64901	4.67458	0.881381	0	-0.176286	1.07636	0.900258
MAB_0308c	2.42858	5.73243	0.74585	4.2199	4.25635	3.65681	4.76261	1.1058	4.64769	2.46714	-0.0736688	0	-0.401806	1.14766	0.674738
MAB_0309	3.92206	9.66816	0.919967	7.99523	7.96675	7.54256	8.61887	1.07631	4.65659	5.26236	-0.766789	0	-0.100444	1.02041	0.976101
MAB_0310c	5.59049	10.7239	1.11138	8.69967	8.84219	8.11542	9.33908	1.22366	4.65501	3.60152	-0.73005	0	0.0752035	1.03618	1.15175
MAB_0311c	6.40074	10.5537	1.06193	8.34463	8.37667	7.47766	9.13564	1.65799	4.6554	2.1911	0.0923913	0	0.0329061	1.02903	1.10945
MAB_0312c	4.47731	8.40181	0.830824	6.71995	6.8649	6.18426	7.21853	1.03426	4.65561	3.02357	-0.609852	0	-0.188169	1.01899	0.888375
MAB_0313c	2.19854	7.27412	0.808055	5.33117	5.41486	4.86828	5.78689	0.91861	4.65132	5.48197	-0.746569	0	-0.259023	1.06708	0.817522
MAB_0314c	3.23264	7.0591	0.829053	5.29974	5.50079	4.85152	5.87715	1.02563	4.65061	3.13376	-0.826477	0	-0.239983	1.06904	0.836562
MAB_0315	2.93229	6.54119	0.73892	5.03789	5.13747	4.50994	5.58481	1.07486	4.6524	2.88627	-0.499041	0	-0.34816	1.08708	0.728385
MAB_0316	1.64598	6.09045	0.756787	4.08315	4.18962	3.7251	4.50742	0.782317	4.64537	3.8943	-0.548605	0	-0.401482	1.15827	0.675063
MAB_0317	5.16254	10.0009	0.745478	8.09688	8.0078	7.74056	8.578	0.83744	4.65915	4.70063	-0.446674	0	-0.277275	1.02275	0.799269
MAB_0318c	7.29756	12.2219	0.94917	9.83988	9.80224	9.24632	10.1722	0.925882	4.65887	3.45539	0.409807	0	-0.118956	1.06813	0.957589
MAB_0319	4.83774	8.87675	0.8565	7.63865	7.86142	7.15401	8.29036	1.13635	4.65692	3.70628	-1.02144	0	-0.15945	1.01595	0.917095
MAB_0320	3.9125	7.95293	0.99834	6.24755	6.41529	5.33306	7.0423	1.70923	4.65052	1.88474	-0.239163	0	-0.0322268	1.03057	1.04432
MAB_0321c	1.01617	5.1009	0.818533	3.25144	3.246	2.7077	3.82132	1.11361	4.63024	3.02395	-0.206797	0	-0.398477	1.21701	0.678068
MAB_0322c	0	6.82823	1.36378	4.31326	4.54278	3.26788	5.30737	2.03949	4.60767	2.67502	-0.300725	0.00943396	0.223394	1.14039	1.29994
MAB_0323c	2.05063	11.3544	1.1372	5.68137	5.57339	5.14843	6.01613	0.867699	4.64519	13.6682	2.21043	0	0.0874181	1.04978	1.16396
MAB_0324c	3.29545	10.3405	1.08843	6.15348	6.07023	5.58816	6.68346	1.0953	4.64826	5.76004	0.792391	0	0.0555083	1.03292	1.13205
MAB_0325c	0	10.6103	2.27081	3.98324	3.11056	2.44864	5.21547	2.76683	4.51586	3.82227	1.19415	0.00943396	1.10489	1.16592	2.18143
MAB_0326	0.875441	7.90724	0.951811	4.67224	4.77121	4.14593	5.1346	0.988677	4.64077	6.22181	-0.563533	0	-0.161332	1.11314	0.915212
MAB_0327	0	6.63423	1.03818	4.80415	4.95942	4.57515	5.46596	0.890813	4.63365	7.21213	-1.63937	0.00943396	-0.065584	1.10376	1.01096
MAB_0328	3.15745	8.15103	1.06536	5.99097	5.74884	5.27659	6.62412	1.34753	4.64767	2.82186	0.15228	0	0.0275873	1.03777	1.10413
MAB_0329	3.21791	12.0184	1.15207	6.75727	6.87437	6.05921	7.25003	1.19082	4.64978	10.1145	1.58904	0	0.133883	1.01819	1.21043
MAB_0330	4.77199	9.22369	0.997066	7.87371	8.15815	7.65379	8.50366	0.849871	4.655	3.87156	-1.19978	0	-0.0210205	1.01809	1.05552
MAB_0331c	0	9.80412	2.6054	3.14841	2.16176	1.43055	4.13657	2.70602	4.34535	2.93975	1.08939	0.0566038	1.38183	1.22358	2.45837
MAB_0332c	0	9.56441	2.74427	2.77131	1.65499	0.756366	4.70861	3.95225	4.20278	2.56128	0.997671	0.0660377	1.49758	1.24669	2.57412
MAB_0334c	0	9.08538	2.6688	3.17956	2.06733	1.36612	4.7887	3.42258	4.33712	2.63966	1.01526	0.0471698	1.4472	1.22161	2.52374
MAB_0335	1.58362	11.4807	2.68422	5.40914	4.89034	3.31467	6.56656	3.25188	4.54772	2.72067	0.833651	0	1.6217	1.06251	2.69825
MAB_0336	1.71519	9.49427	2.13759	4.86374	4.07138	3.54136	6.00912	2.46776	4.57455	2.68799	0.936066	0	1.03799	1.09961	2.11453
MAB_0337c	6.42544	11.4229	0.842758	8.46769	8.44586	8.08558	8.68857	0.602989	4.65871	6.90808	1.39741	0	-0.189184	1.03194	0.88736
MAB_0338c	0	13.4245	2.00208	5.21866	4.77352	4.29982	6.10381	1.80399	4.58616	7.5121	1.06063	0.0188679	0.927726	1.07435	2.00427
MAB_0339	2.53107	6.82417	0.772425	5.35764	5.41093	4.90851	5.93773	1.02922	4.65263	3.73682	-0.710212	0	-0.293053	1.06548	0.783491
MAB_0340	2.291	7.84541	1.21182	5.60675	5.92815	4.64754	6.50967	1.86214	4.63894	2.47143	-0.483161	0	0.158794	1.05303	1.23534
MAB_0341	0	6.81864	0.917642	4.72989	4.86231	4.19484	5.25918	1.06434	4.64001	8.36679	-1.21237	0.00943396	-0.191344	1.10899	0.8852
MAB_0342c	2.25443	6.66333	0.544405	4.91817	4.97328	4.71002	5.18091	0.470888	4.65696	9.14473	-1.17031	0	-0.551324	1.09573	0.52522
MAB_0343	6.46695	12.5081	1.07499	9.31448	9.24161	8.88342	9.69936	0.815937	4.6569	4.02936	0.454206	0	0.0243336	1.05066	1.10088
MAB_0344	6.91554	11.7505	0.835392	9.39968	9.46225	8.96319	9.64866	0.68547	4.65954	4.87723	0.291218	0	-0.217813	1.0532	0.858732
MAB_0345	3.43246	9.30639	1.31827	6.07009	6.03564	5.14881	7.09372	1.94491	4.63987	2.4426	0.138846	0	0.283016	1.03526	1.35956
MAB_0346	4.98822	9.58084	0.87564	6.65722	6.39894	6.12618	7.1637	1.03752	4.65515	4.20736	0.978395	0	-0.144763	1.0204	0.931782
MAB_0347	3.53705	7.5305	0.903844	5.20034	4.98595	4.52539	5.59664	1.07124	4.64889	3.10384	0.714085	0	-0.17175	1.07559	0.904794
MAB_0348	3.26831	6.86999	0.695732	5.28441	5.39462	4.86557	5.77236	0.906787	4.65451	3.62966	-0.625286	0	-0.374282	1.07001	0.702263
MAB_0349c	0.932018	10.5092	1.36751	4.73958	4.5739	4.07705	5.15242	1.07537	4.62448	8.09555	1.47198	0	0.259213	1.1083	1.33576
MAB_0350	0.653773	7.17826	0.821787	4.24689	4.29873	3.84401	4.67423	0.830224	4.64293	8.24511	-0.410321	0	-0.323767	1.14555	0.752778
MAB_0351	5.89793	13.7788	1.57394	8.48575	8.25611	7.51782	8.93726	1.41945	4.64747	4.96109	1.38343	0	0.541603	1.03234	1.61815
MAB_0352	4.84635	9.44585	0.677217	6.8398	6.86899	6.46903	7.15157	0.682535	4.65866	6.54936	0.788213	0	-0.339301	1.01652	0.737243
MAB_0353	3.78846	7.24287	0.594613	5.28148	5.23331	4.88416	5.71096	0.826803	4.65721	3.65158	0.399745	0	-0.475589	1.0702	0.600955
MAB_0354c	3.29744	7.91397	0.837126	5.5986	5.66905	5.16182	5.90426	0.742439	4.65241	4.09554	0.384501	0	-0.216263	1.05339	0.860281
MAB_0355	3.65289	9.01379	0.980326	7.03041	7.12101	6.27012	7.80436	1.53423	4.6534	3.83696	-0.581922	0	-0.0339338	1.01426	1.04261
MAB_0356c	1.4672	11.3356	1.89528	7.49397	7.43772	6.16654	8.84072	2.67418	4.62913	3.22059	-0.379797	0	0.879541	1.01574	1.95609
MAB_0357c	0.447156	10.2202	2.03827	4.62442	4.0326	3.14358	6.01664	2.87305	4.56875	2.91162	0.683644	0	0.921623	1.11665	1.99817
MAB_0358	1.41849	7.88637	1.27963	4.62125	4.64839	3.77944	5.33583	1.55639	4.62401	3.05886	0.070176	0	0.162747	1.11689	1.23929
MAB_0359	2.17702	6.54715	0.829071	3.87852	3.85761	3.28234	4.28579	1.00346	4.64125	3.37732	0.588248	0	-0.34472	1.17379	0.731824
MAB_0360	1.81813	7.02134	1.11848	4.06437	4.13368	3.24995	4.55891	1.30895	4.62563	3.0672	0.316026	0	-0.0412353	1.15972	1.03531
MAB_0361	1.74335	6.1857	0.926995	4.11373	4.42169	3.42956	4.73268	1.30312	4.63682	2.69365	-0.414417	0	-0.228911	1.15591	0.847634
MAB_0362c	3.09865	10.4158	0.978307	7.96892	8.07058	7.41925	8.65153	1.23228	4.65539	7.99641	-1.20929	0	-0.041549	1.01986	1.035
MAB_0363c	4.25561	9.33163	0.890551	7.59187	7.58534	6.84463	8.23456	1.38993	4.6565	3.37966	-0.228854	0	-0.125414	1.01596	0.951131
MAB_0364c	2.50547	8.61076	0.883847	6.1141	6.11801	5.44082	6.65123	1.21041	4.65285	5.28006	-0.0147969	0	-0.150134	1.03398	0.92641
MAB_0365c	3.27695	8.61523	0.976669	6.53839	6.62393	5.90359	7.17246	1.26887	4.65202	3.32935	-0.372414	0	-0.0465636	1.02323	1.02998
MAB_0366	3.27019	7.74369	0.878874	5.74887	5.70616	5.21649	6.39774	1.18125	4.65151	3.23192	-0.312223	0	-0.168059	1.04693	0.908486
MAB_0367c	2.95481	8.47771	0.771354	5.65873	5.61876	5.23956	5.93619	0.696637	4.65433	5.95972	0.609196	0	-0.279402	1.05076	0.797142
MAB_0368	5.50918	11.2627	1.1396	8.78663	8.65605	8.00227	9.61486	1.6126	4.65504	2.97114	0.00746059	0	0.101825	1.03778	1.17837
MAB_0369	6.84957	10.6271	0.762607	8.77664	8.73171	8.32329	9.19482	0.871528	4.6597	2.69801	0.0828728	0	-0.274976	1.03758	0.801568
MAB_0370	5.33728	9.37761	0.799818	7.23917	7.23412	6.80851	7.79519	0.986677	4.65731	3.02502	-0.206501	0	-0.214578	1.0144	0.861967
MAB_0371	2.5054	7.26838	0.867539	5.28316	5.28945	4.96947	5.98706	1.01759	4.64942	3.30202	-0.586029	0	-0.202556	1.07009	0.873989
MAB_0372	4.4418	8.38761	0.823375	6.42222	6.50289	6.13132	7.01016	0.87884	4.655	3.28645	-0.637802	0	-0.202757	1.02613	0.873787
MAB_0373	5.23364	9.26069	0.789222	7.20986	7.28982	6.82696	7.74387	0.916904	4.65739	3.29722	-0.362239	0	-0.225053	1.01428	0.851491
MAB_0374c	4.22395	9.72158	0.842675	6.03209	6.01055	5.54074	6.40704	0.866298	4.65416	8.02597	1.3034	0	-0.193755	1.03643	0.882789
MAB_0375	1.23953	7.30854	1.24233	3.67684	3.47856	2.72856	4.53407	1.80551	4.60739	2.71165	0.487477	0	0.0539542	1.18838	1.1305
MAB_0376	4.44888	9.89664	1.05876	7.19364	6.93622	6.40687	7.97362	1.56674	4.65283	2.72474	0.425202	0	0.044539	1.01422	1.12108
MAB_0377	4.01148	10.4886	0.910726	5.78734	5.74312	5.27978	6.13609	0.85631	4.65208	11.1608	2.05433	0	-0.13463	1.04536	0.941914
MAB_0378	3.57085	10.8691	1.36711	6.70745	6.42115	5.87308	7.04796	1.17488	4.64395	4.13296	1.13712	0	0.347841	1.01927	1.42439
MAB_0379	2.63075	9.50589	1.33828	5.74565	5.60295	4.98735	6.23877	1.25142	4.6368	3.23786	0.465577	0	0.291211	1.04707	1.36776
MAB_0380	3.58017	9.8354	1.06233	6.49669	6.43181	5.80769	7.05984	1.25215	4.65047	3.71931	0.662284	0	0.0380631	1.02426	1.11461
MAB_0381	3.5306	7.63306	0.583081	5.01232	5.06264	4.75371	5.29786	0.544144	4.65691	9.04984	1.10694	0	-0.505847	1.08893	0.570697
MAB_0382	7.17179	10.4506	0.628611	8.68005	8.77858	8.38731	9.04755	0.660235	4.66081	3.4728	-0.355154	0	-0.407227	1.03584	0.669318
MAB_0383c	4.62748	14.0799	2.05995	7.41346	6.65349	6.19867	7.45605	1.25739	4.62972	5.51685	1.8181	0	1.0446	1.01535	2.12114
MAB_0384	0	9.23288	1.11872	6.36479	6.39975	5.80916	7.16665	1.35749	4.64338	11.5958	-1.67133	0.00943396	0.0911343	1.02759	1.16768
MAB_0385	2.30315	7.39375	0.776526	5.57734	5.66054	5.23362	6.04981	0.81619	4.6531	5.84808	-1.10002	0	-0.277806	1.05433	0.798738
MAB_0386c	5.63033	9.59552	0.690428	7.37608	7.35407	6.97028	7.72665	0.756377	4.65913	4.13709	0.414289	0	-0.324712	1.01514	0.751833
MAB_0387	4.38511	7.61319	0.583573	5.7527	5.70348	5.47254	6.06391	0.591369	4.65842	3.86547	0.610142	0	-0.463201	1.04677	0.613344
MAB_0388c	2.79106	6.77745	0.661187	4.76439	4.7222	4.37791	5.15126	0.77335	4.65386	3.69186	0.160677	0	-0.445353	1.10654	0.631192
MAB_0389c	0.957108	6.83142	0.981512	4.46366	4.48671	3.77852	5.23728	1.45876	4.63801	3.52346	-0.277751	0	-0.147253	1.12877	0.929292
MAB_0390c	1.06923	5.41235	0.639769	3.93865	3.88966	3.51923	4.28287	0.763642	4.64961	6.02514	-0.329979	0	-0.529528	1.1693	0.547016
MAB_0391c	0	7.29828	0.963169	5.24389	5.29744	4.70839	5.80049	1.0921	4.64193	9.99632	-1.4729	0.00943396	-0.109492	1.07266	0.967053
MAB_0392c	2.71096	8.62797	0.980251	5.73836	5.84933	5.16669	6.32267	1.15599	4.64851	4.4007	-0.167063	0	-0.0671181	1.04737	1.00943
MAB_0393	1.16331	10.9155	1.59374	4.45734	4.07845	3.52612	5.36478	1.83866	4.60265	5.81685	1.0863	0	0.464494	1.12925	1.54104
MAB_0394c	1.46871	7.13115	0.920617	4.24675	4.25951	3.64249	4.84768	1.20518	4.6394	3.94017	0.01642	0	-0.224948	1.14556	0.851597
MAB_0395c	5.21143	10.1044	0.772698	8.17453	8.14868	7.78394	8.5688	0.784852	4.6589	5.10852	-0.559295	0	-0.25199	1.02469	0.824554
MAB_0396c	2.43841	7.78513	0.912822	5.82259	5.75717	5.30225	6.40658	1.10433	4.65081	3.86774	-0.333627	0	-0.131125	1.04395	0.94542
MAB_0397c	3.49928	10.0966	0.952167	5.57327	5.59253	4.99675	6.06508	1.06833	4.64961	9.21034	1.35778	0	-0.102347	1.05451	0.974197
MAB_0398c	1.02319	8.81351	1.13733	4.54854	4.81476	3.79142	5.23792	1.44649	4.63122	5.46113	0.235529	0	0.0150118	1.12232	1.09156
MAB_0399c	4.11725	9.95233	1.05856	7.14941	7.33602	6.74207	7.82124	1.07917	4.65209	3.61922	-0.619406	0	0.0444522	1.01411	1.121
MAB_0400c	4.2225	10.3111	0.904865	6.92409	7.04922	6.3659	7.368	1.0021	4.6549	5.05507	0.111673	0	-0.110284	1.01515	0.96626
MAB_0401	6.27231	9.85407	0.734024	8.62904	8.61277	8.1602	9.20083	1.04063	4.65979	3.30393	-0.494768	0	-0.300973	1.035	0.775572
MAB_0402	4.70147	10.6031	1.28172	7.93625	7.88172	6.82977	8.96775	2.13798	4.65036	2.1646	-0.0458524	0	0.262513	1.0192	1.33906
MAB_0403	2.83407	10.3727	1.53099	6.32795	6.01289	5.22596	7.4151	2.18914	4.63532	3.07865	0.698443	0	0.502463	1.02853	1.57901
MAB_0404c	2.87469	10.7961	1.74112	6.12551	5.6374	5.10982	6.68199	1.57217	4.62628	3.89444	1.1856	0	0.707455	1.03367	1.784
MAB_0405c	5.78358	11.7369	0.99311	9.53417	9.69899	9.03587	10.1044	1.06852	4.65787	4.38623	-0.786171	0	-0.064351	1.05746	1.01219
MAB_0406c	6.73894	10.7631	0.692601	8.18862	8.09218	7.71758	8.67312	0.955531	4.65994	3.88165	0.602265	0	-0.332446	1.02505	0.744098
MAB_0407c	8.11243	13.4372	0.881404	9.76094	9.62479	9.2271	10.2128	0.985724	4.65951	5.87271	1.11037	0	-0.183844	1.06525	0.892701
MAB_0408c	6.47288	11.0431	0.695738	8.96637	9.16057	8.65904	9.35401	0.69497	4.66039	4.63884	-0.645817	0	-0.345832	1.04157	0.730713
MAB_0409	3.22409	12.1152	1.67387	8.54979	8.33043	7.40234	9.69135	2.28901	4.64399	2.88003	-0.0388556	0	0.640231	1.03363	1.71678
MAB_0410c	4.68718	11.1333	1.17278	8.16688	8.00594	7.51113	9.02299	1.51186	4.65324	3.1622	0.269068	0	0.148287	1.02449	1.22483
MAB_0411c	5.05554	9.76523	0.954669	8.35233	8.53115	7.85024	9.00524	1.15501	4.65669	3.50116	-0.88967	0	-0.0745506	1.02922	1.00199
MAB_0412	0	9.5988	1.19596	5.32818	5.24084	4.86198	5.58821	0.726236	4.6348	10.3507	0.389122	0.00943396	0.128699	1.06726	1.20524
MAB_0413	4.4419	9.02265	0.79014	7.15078	7.04084	6.70157	7.70189	1.00032	4.65726	3.9907	-0.325722	0	-0.223972	1.01411	0.852572
MAB_0414	5.79759	8.90328	0.780383	7.63053	7.66753	7.16451	8.22304	1.05853	4.65816	2.46842	-0.409465	0	-0.235565	1.01595	0.840979
MAB_0415	4.83526	10.5826	1.5023	8.07561	7.9402	7.17223	9.40936	2.23712	4.646	2.28253	-0.0560334	0	0.480055	1.02224	1.5566
MAB_0416c	5.43517	11.7989	1.22804	9.20329	9.34773	8.70029	9.85809	1.1578	4.6543	3.67066	-0.548346	0	0.180521	1.04752	1.25707
MAB_0417c	4.7137	10.3733	1.00792	7.80935	7.88536	7.32752	8.19869	0.87117	4.65499	4.62156	-0.231383	0	-0.009225	1.01714	1.06732
MAB_0418	6.46714	10.1036	0.638973	7.97193	7.95152	7.74932	8.22108	0.471762	4.66025	4.14487	0.0555718	0	-0.380946	1.01992	0.695599
MAB_0419	5.52005	11.7274	0.891682	8.03136	8.02008	7.6024	8.53043	0.928033	4.65739	7.16098	0.604798	0	-0.129529	1.02121	0.947016
MAB_0420	6.22763	10.3889	0.733311	8.64263	8.72085	8.16324	9.14151	0.978268	4.65981	3.3113	-0.51821	0	-0.301904	1.03521	0.774641
MAB_0421	7.61367	11.2013	0.71389	9.60852	9.58407	9.17747	10.2087	1.03119	4.66067	2.83154	-0.40635	0	-0.346042	1.05993	0.730502
MAB_0422c	4.38183	8.85746	0.82554	6.74419	6.71761	6.43965	7.14293	0.703288	4.65595	3.74356	0.0164341	0	-0.192927	1.01847	0.883617
MAB_0423c	4.91571	9.80826	0.91881	8.39103	8.561	7.96328	8.98021	1.01694	4.65722	4.12629	-1.00438	0	-0.111357	1.03017	0.965187
MAB_0424	5.5165	10.6268	0.9754	8.61976	8.57613	8.16872	9.11158	0.942862	4.65695	3.59234	-0.392811	0	-0.059449	1.03485	1.0171
MAB_0425c	6.95308	13.466	1.01987	11.2873	11.3542	10.6279	12.0203	1.3924	4.65926	4.87339	-0.842714	0	-0.111576	1.13144	0.964969
MAB_0426	4.92124	9.2753	0.781148	7.01821	6.92751	6.68722	7.40608	0.718857	4.6573	3.74702	0.194173	0	-0.233173	1.01432	0.843372
MAB_0427	3.91119	8.53034	0.795016	5.92564	5.96173	5.56052	6.32417	0.763654	4.65442	3.7736	-0.00445712	0	-0.245032	1.04005	0.831513
MAB_0428	1.31115	7.91399	1.09952	5.4577	5.72598	4.84354	6.0187	1.17516	4.64086	4.92985	-1.05527	0	0.0396009	1.05992	1.11615
MAB_0429	7.21585	12.9746	0.96412	9.5807	9.71136	8.92073	10.165	1.24423	4.65845	4.29677	0.329698	0	-0.0948772	1.059	0.981667
MAB_0430	2.27474	8.49756	1.16304	6.1599	6.30935	5.658	6.77346	1.11546	4.64404	4.49635	-0.978572	0	0.130286	1.03276	1.20683
MAB_0431c	2.30734	8.36736	1.12385	5.55689	5.64204	4.96054	6.17075	1.2102	4.64263	3.67667	0.00193265	0	0.0686027	1.05525	1.14515
MAB_0432	2.01664	10.4021	1.5817	4.48723	4.09076	3.6428	4.79339	1.15059	4.61099	8.23151	2.14262	0	0.454735	1.12696	1.53128
MAB_0433	3.84575	11.2799	1.40536	5.52531	5.17433	4.61775	5.86884	1.25109	4.63506	7.70506	2.01244	0	0.348694	1.05666	1.42524
MAB_0434c	2.76165	8.09119	0.802544	6.94827	7.02821	6.46575	7.54872	1.08297	4.65616	9.68355	-1.81001	0	-0.212328	1.01487	0.864217
MAB_0435c	0	4.89099	0.81035	2.73876	2.73833	2.2966	3.0981	0.801496	4.61557	4.35733	0.143925	0.00943396	-0.438282	1.24863	0.638262
MAB_0436	0	5.82	1.42698	2.3939	2.55938	1.22565	3.18445	1.9588	4.46333	2.4407	0.331891	0.0566038	0.158194	1.26879	1.23474
MAB_0437c	0	10.173	1.62028	6.71846	6.73632	5.84141	7.97637	2.13496	4.62888	4.88	-0.835401	0.00943396	0.601255	1.01903	1.6778
MAB_0438c	1.49111	12.3696	1.44723	6.13856	6.10189	5.50286	6.624	1.12114	4.63641	7.28769	1.00694	0	0.413915	1.03331	1.49046
MAB_0439	1.98983	8.18687	0.903995	3.47842	3.37817	2.94621	3.87795	0.931743	4.63385	13.7474	2.40246	0	-0.298066	1.20206	0.778478
MAB_0440	6.88439	12.0869	0.992327	9.19842	9.08407	8.5035	9.6132	1.10971	4.65778	3.70626	0.678468	0	-0.0550602	1.04739	1.02148
MAB_0441	6.5902	11.1237	0.895043	8.56288	8.36965	7.92899	9.12959	1.2006	4.65811	3.04063	0.576999	0	-0.138836	1.03388	0.937708
MAB_0442	4.18272	8.16347	0.806869	5.86958	5.91173	5.24835	6.28447	1.03612	4.65413	2.97118	0.304479	0	-0.235257	1.04213	0.841288
MAB_0443	4.57936	8.92423	0.919059	6.92885	6.8666	6.21874	7.64427	1.42553	4.65472	2.35133	0.146036	0	-0.0960321	1.01509	0.980512
MAB_0444	0	7.33358	1.2413	4.01462	3.86028	3.22176	4.98078	1.75902	4.61134	3.38197	0.0320459	0.00943396	0.0777623	1.16353	1.15431
MAB_0445	4.76556	9.00245	0.978338	7.0415	7.08538	6.68759	7.75385	1.06626	4.6536	2.52611	-0.431304	0	-0.0358742	1.01421	1.04067
MAB_0446c	3.16264	7.00877	0.779585	4.94804	4.76605	4.39849	5.4956	1.09711	4.65125	2.78926	0.377356	0	-0.313994	1.09358	0.762551
MAB_0447c	1.37005	5.60616	0.987673	3.71272	3.74456	2.99618	4.44503	1.44885	4.62649	2.30535	-0.231026	0	-0.198161	1.18583	0.878384
MAB_0448c	0	8.86694	2.28362	3.44716	2.9365	1.6151	5.45129	3.83619	4.40491	1.8145	0.119681	0.0754717	1.07946	1.20416	2.156
MAB_0449	7.09786	12.9673	1.18158	9.03442	9.20413	8.14771	9.55916	1.41145	4.65517	4.21567	0.794602	0	0.138405	1.04317	1.21495
MAB_0450c	1.29849	9.07611	1.19693	5.64934	5.62332	4.78762	6.2637	1.47608	4.64021	4.44146	-0.00406323	0	0.145769	1.05116	1.22231
MAB_0451c	3.01704	9.98677	1.22182	6.43327	6.44812	5.67297	7.14773	1.47476	4.6452	3.43433	0.0163298	0	0.195965	1.02585	1.27251
MAB_0452c	1.96639	8.70347	1.16558	5.10745	4.99697	4.57557	5.72027	1.1447	4.63668	3.97055	0.0177691	0	0.0834893	1.08209	1.16003
MAB_0453c	0.283694	8.01686	1.60702	3.8797	3.6991	3.13023	4.87533	1.74509	4.57	3.46277	0.233259	0	0.433313	1.1737	1.50986
MAB_0454c	0	5.10534	1.20177	2.06976	1.81279	1.38672	2.57137	1.18465	4.47554	2.77089	0.472687	0.0566038	-0.0855999	1.28737	0.990945
MAB_0455	0	7.62751	1.6072	3.43348	2.99528	2.36	4.38704	2.02704	4.55674	2.98397	0.780621	0.00943396	0.402128	1.20508	1.47867
MAB_0456	0	6.6008	1.54427	2.26826	1.81802	1.20317	3.12646	1.92329	4.42736	3.25583	0.855372	0.0471698	0.268254	1.27602	1.3448
MAB_0457	0	8.3972	1.26994	3.20198	3.02895	2.51928	4.11808	1.5988	4.58049	5.97302	0.799125	0.0188679	0.0497621	1.22018	1.12631
MAB_0458	1.55195	7.13003	1.11943	4.38791	4.32968	3.55777	5.10086	1.54308	4.63055	2.53121	0.113355	0	-0.0151615	1.1346	1.06138
MAB_0459c	1.48044	5.6468	0.941365	4.01773	4.24958	3.53284	4.71771	1.18487	4.63351	2.9448	-0.823883	0	-0.221931	1.1633	0.854614
MAB_0460	0	6.94271	1.72232	2.40652	1.81703	1.22303	3.2256	2.00257	4.41726	3.17116	1.01873	0.0471698	0.454261	1.26806	1.53081
MAB_0462c	3.9841	9.7386	1.12005	6.65002	6.49528	5.98237	6.97448	0.992102	4.64985	4.30004	0.906565	0	0.0994809	1.02057	1.17603
MAB_0463c	4.04086	8.49945	0.867669	6.60967	6.52713	6.15095	7.03477	0.883818	4.65487	3.16038	0.134265	0	-0.153844	1.02151	0.9227
MAB_0464	4.82926	10.6549	1.23176	7.0145	6.90621	6.07788	7.6818	1.60392	4.64851	3.07288	0.625723	0	0.21742	1.01434	1.29396
MAB_0465	0	6.28477	0.930695	3.16538	3.18694	2.63871	3.8084	1.16969	4.61094	4.97179	-0.48343	0.0188679	-0.29181	1.22251	0.784735
MAB_0466	1.39143	7.49197	0.977513	4.36873	4.36942	3.6485	5.0442	1.3957	4.63782	3.3313	-0.0173301	0	-0.158567	1.13608	0.917977
MAB_0467	1.88088	7.35114	1.28617	4.19856	3.85865	3.32147	5.13164	1.81017	4.6182	2.50293	0.601494	0	0.136851	1.14932	1.2134
MAB_0468	0	7.77935	1.33589	3.50986	3.42423	2.69229	4.45171	1.75942	4.57856	3.76916	-0.0200288	0.0283019	0.135958	1.19993	1.2125
MAB_0469c	0	7.43417	1.94599	3.09268	2.60842	1.53598	4.56536	3.02938	4.44914	2.08294	0.386494	0.0377358	0.718909	1.22708	1.79545
MAB_0470c	1.57928	8.20261	1.40503	5.16323	5.34115	4.31838	6.03068	1.7123	4.62394	2.69738	-0.391061	0	0.326872	1.07816	1.40342
MAB_0471	0	6.79949	0.979109	3.51942	3.47603	2.97527	4.10153	1.12626	4.61986	4.96077	-0.113835	0.00943396	-0.220174	1.19928	0.856371
MAB_0472	0	5.53299	1.06551	2.36294	2.32502	1.77121	2.95749	1.18628	4.54689	3.45649	0.184186	0.0283019	-0.205061	1.27058	0.871483
MAB_0473	0.0544876	4.35197	0.858857	1.87223	1.69657	1.21078	2.23815	1.02737	4.5618	3.66997	0.886106	0	-0.439822	1.29868	0.636722
MAB_0474	0	5.36007	1.14618	2.21869	2.17473	1.56817	2.89529	1.32712	4.50898	3.11545	0.260248	0.0471698	-0.13268	1.27886	0.943865
MAB_0476c	1.51866	9.63421	1.44489	4.31135	4.08449	3.34737	4.89107	1.5437	4.61231	5.73197	1.4045	0	0.30435	1.14053	1.38089
MAB_0477	0.580975	9.88465	1.56667	3.80919	3.62408	3.10655	3.97155	0.865006	4.59242	10.0128	2.3207	0	0.38778	1.17889	1.46432
MAB_0478	5.09174	12.7473	1.37151	7.38274	7.19855	6.58594	7.68044	1.09451	4.64807	9.67418	2.28915	0	0.356329	1.01518	1.43287
MAB_0479	2.21085	7.83442	0.931134	5.87116	5.86639	5.20692	6.56092	1.354	4.65038	3.97701	-0.474835	0	-0.110932	1.04207	0.965613
MAB_0480	2.01752	7.61066	1.0583	4.79575	4.56361	4.08775	5.60524	1.51749	4.63944	2.78262	0.372893	0	-0.0460431	1.10435	1.0305
MAB_0481c	2.47532	6.70768	1.09284	4.28437	4.06073	3.43656	4.77112	1.33455	4.63213	2.39897	0.606519	0	-0.0497913	1.14263	1.02675
MAB_0482c	3.92671	8.67839	1.18078	5.80165	5.64923	4.88598	6.36547	1.4795	4.64341	2.54816	0.581287	0	0.136003	1.04478	1.21255
MAB_0483c	4.3347	8.16135	0.686796	5.61854	5.51745	5.21234	6.04262	0.830285	4.65627	5.19822	1.04328	0	-0.365714	1.05251	0.71083
MAB_0484	5.21143	9.19781	0.740782	7.87954	7.85845	7.37189	8.45392	1.08203	4.65898	3.36249	-0.405736	0	-0.277401	1.01818	0.799144
MAB_0485	3.72849	7.66812	0.827408	5.18988	5.04024	4.61305	5.63482	1.02177	4.65123	3.1753	0.787554	0	-0.248903	1.07631	0.827642
MAB_0486c	6.32002	8.77306	0.458208	7.68078	7.7725	7.39121	7.99432	0.603115	4.66165	3.49918	-0.637812	0	-0.557836	1.01604	0.518709
MAB_0487	5.43427	11.2892	1.09371	9.71036	9.9012	8.9732	10.5517	1.57854	4.65688	4.38965	-0.884182	0	0.0302608	1.06345	1.10681
MAB_0488	7.75647	11.4708	0.829838	9.54515	9.58251	8.98467	10.0648	1.08008	4.65967	2.60573	-0.0947395	0	-0.227982	1.05782	0.848563
MAB_0489	8.15551	11.0305	0.61943	9.91939	9.9723	9.46361	10.4045	0.940869	4.66149	2.44501	-0.403301	0	-0.451676	1.07111	0.624869
MAB_0490c	4.39977	8.55435	0.711773	6.57741	6.56167	6.15953	6.99244	0.832901	4.65763	4.00594	0.190347	0	-0.310511	1.02228	0.766034
MAB_0491	7.16607	11.22	0.709022	8.74011	8.51657	8.26814	9.21798	0.949837	4.66024	4.0352	0.811334	0	-0.327879	1.0369	0.748666
MAB_0492	3.11449	7.88368	0.788736	5.34669	5.25	4.90171	5.6442	0.742491	4.65293	4.42995	0.806821	0	-0.277398	1.06613	0.799146
MAB_0493	2.42277	7.29103	0.727127	5.38258	5.47663	4.93067	5.7895	0.85883	4.65409	5.04654	-0.336369	0	-0.336889	1.06402	0.739655
MAB_0494	2.06956	7.3498	0.947868	5.10591	5.15576	4.60742	5.80519	1.19777	4.64547	3.2229	-0.481898	0	-0.134328	1.0822	0.942217
MAB_0495c	2.85171	7.33649	0.987322	4.97331	4.77739	4.21808	5.85502	1.63693	4.64378	2.06939	0.106784	0	-0.104431	1.09175	0.972114
MAB_0496c	0	8.72624	1.44589	5.07383	5.05553	4.28538	5.87005	1.58467	4.61699	4.25664	-0.337575	0.00943396	0.361398	1.08449	1.43794
MAB_0497	6.02337	10.355	0.734077	7.90532	7.93328	7.54566	8.27741	0.731747	4.65919	3.9435	0.356048	0	-0.284552	1.01863	0.791993
MAB_0498c	1.23098	7.75746	1.35254	3.61674	3.66333	2.67964	4.29178	1.61214	4.59714	4.23586	0.94192	0	0.159955	1.19259	1.2365
MAB_0499	0.731544	5.01277	0.857531	2.92056	2.93352	2.31591	3.47994	1.16403	4.61869	2.81871	-0.000831332	0	-0.380168	1.2377	0.696376
MAB_0500c	3.20231	6.41064	0.828134	5.31882	5.59814	4.94251	5.96568	1.02317	4.65069	2.90929	-0.916279	0	-0.239706	1.06784	0.836838
MAB_0501c	5.28374	9.92328	0.692921	8.30063	8.34884	7.95069	8.64135	0.690651	4.65989	5.43327	-0.721035	0	-0.334997	1.02792	0.741547
MAB_0502c	1.72257	6.50649	0.822629	4.36453	4.38511	3.80067	4.90477	1.1041	4.64533	3.36475	-0.0953965	0	-0.313776	1.13641	0.762768
MAB_0503	3.84758	8.94596	0.927228	7.26693	7.25999	6.6651	8.04856	1.38346	4.65513	3.65627	-0.425531	0	-0.0872998	1.01453	0.989245
MAB_0504c	4.30859	8.36325	0.791108	7.04471	7.07201	6.45998	7.71458	1.2546	4.65704	3.05596	-0.470674	0	-0.223093	1.0142	0.853452
MAB_0505c	4.24183	10.5955	0.784211	6.77389	6.80329	6.41202	7.06358	0.651556	4.65705	10.3039	1.48089	0	-0.233629	1.01784	0.842916
MAB_0507	4.47898	9.57485	1.00399	6.92986	6.83569	6.45547	7.74942	1.29395	4.65295	2.71827	0.0101225	0	-0.011087	1.01508	1.06546
MAB_0508c	2.61609	6.90137	0.939894	5.31737	5.45639	4.84445	5.90473	1.06028	4.64693	3.14634	-0.792423	0	-0.128036	1.06793	0.948509
MAB_0509c	3.50381	8.19114	0.858112	6.57088	6.77717	6.17801	7.14897	0.970959	4.65435	5.0448	-1.34393	0	-0.164329	1.02244	0.912216
MAB_0510c	5.96226	10.4808	0.80564	8.49084	8.69643	7.9731	9.03445	1.06135	4.65886	3.74123	-0.671747	0	-0.226805	1.03244	0.84974
MAB_0511c	5.48074	9.66501	0.91907	6.97757	6.86917	6.33079	7.27159	0.940798	4.65513	3.74116	0.976284	0	-0.0955266	1.0146	0.981018
MAB_0512	3.58303	7.22315	0.768308	5.08148	5.05673	4.58478	5.64028	1.0555	4.65205	2.39503	0.0666449	0	-0.315633	1.08394	0.760912
MAB_0513	1.72103	7.37087	1.04702	4.41202	4.15232	3.71531	4.98603	1.27072	4.63618	3.23643	0.647933	0	-0.0857133	1.13273	0.990831
MAB_0514	1.98238	6.79613	0.84376	5.41373	5.46474	4.95001	6.11221	1.1622	4.65054	4.45586	-0.889305	0	-0.218499	1.06226	0.858046
MAB_0515	2.91051	6.94041	0.759762	4.87567	4.92728	4.51855	5.36315	0.844602	4.65109	3.62753	-0.222946	0	-0.339001	1.09876	0.737544
MAB_0516c	1.35655	7.01161	1.39438	3.58684	3.54478	2.3755	4.16393	1.78842	4.59041	2.68243	0.627822	0	0.199721	1.19466	1.27627
MAB_0517	3.47091	8.16445	1.1309	5.46776	5.14002	4.7302	6.34818	1.61798	4.64263	2.34318	0.484365	0	0.0714944	1.0594	1.14804
MAB_0518c	3.23637	10.2988	1.36477	8.04401	8.28261	7.41002	8.96692	1.5569	4.64823	3.59994	-0.775774	0	0.343275	1.0215	1.41982
MAB_0519	5.54938	8.56801	0.628871	7.3631	7.37702	6.97051	7.83351	0.863	4.65977	3.04033	-0.400775	0	-0.386194	1.01506	0.690351
MAB_0520	4.52516	7.64904	0.594233	6.1995	6.20027	5.9213	6.56068	0.639378	4.65883	3.24514	-0.245611	0	-0.437538	1.03177	0.639006
MAB_0521	1.91487	6.23686	0.780834	4.43519	4.45951	4.07583	4.82505	0.749225	4.64757	3.55617	-0.206935	0	-0.350115	1.13095	0.726429
MAB_0522c	3.96436	8.87546	1.31382	6.52812	6.27027	5.48285	7.71273	2.22987	4.64338	1.87159	0.189435	0	0.29034	1.02348	1.36688
MAB_0523	3.91963	8.33385	0.755743	6.97685	7.01164	6.57066	7.40129	0.830622	4.65742	4.62133	-0.676055	0	-0.25886	1.0146	0.817684
MAB_0524c	4.55146	9.82779	0.837326	7.39388	7.44177	6.9298	7.92266	0.992853	4.65694	4.31195	-0.350981	0	-0.177916	1.01524	0.898629
MAB_0525c	4.73382	9.43149	0.799572	7.2022	7.2886	6.77505	7.67652	0.901469	4.65719	4.67953	-0.377707	0	-0.214676	1.01425	0.861869
MAB_0526c	2.54714	8.2712	1.0878	5.82743	6.09911	5.1928	6.56816	1.37535	4.64512	3.07413	-0.629712	0	0.044046	1.04376	1.12059
MAB_0527c	4.32294	8.67428	1.05847	6.78975	7.06364	6.14855	7.3787	1.23014	4.65087	2.77698	-0.599502	0	0.0409571	1.01751	1.1175
MAB_0528c	3.24352	7.85518	0.954365	5.99177	6.13984	5.49749	6.55038	1.05288	4.6503	3.27641	-0.554373	0	-0.0833812	1.03775	0.993163
MAB_0529c	0.956035	6.08337	0.958407	3.84312	3.92049	3.32747	4.56055	1.23307	4.62964	3.26134	-0.585282	0	-0.217996	1.1764	0.858548
MAB_0530	0.740165	7.07846	0.971636	4.18754	4.28533	3.67718	4.67234	0.995158	4.63505	4.3225	-0.137206	0	-0.17854	1.15018	0.898005
MAB_0531c	2.27716	7.12801	0.832817	5.50545	5.51627	5.05137	5.98155	0.930185	4.65129	5.49687	-0.855032	0	-0.224754	1.05757	0.851791
MAB_0532	2.10661	6.56159	0.754045	4.83852	5.05218	4.39661	5.38872	0.992107	4.6506	4.08402	-0.880796	0	-0.347335	1.10138	0.729209
MAB_0533	8.45029	11.826	0.554206	10.7216	10.8223	10.507	11.0021	0.495068	4.66208	6.01559	-1.20567	0	-0.550694	1.1049	0.52585
MAB_0534	5.84846	9.219	0.695134	7.96031	8.0299	7.56632	8.42707	0.860753	4.65955	3.90396	-0.825205	0	-0.324546	1.01968	0.751998
MAB_0535	3.41925	8.05542	0.843512	6.97545	7.18031	6.78231	7.4573	0.674991	4.65533	8.9986	-2.21549	0	-0.171103	1.01461	0.905442
MAB_0536	1.38977	8.40405	1.38615	6.33334	6.58222	5.89775	7.12356	1.22581	4.63548	5.50849	-1.39633	0	0.357754	1.02839	1.4343
MAB_0537	0	8.32937	1.47954	6.14339	6.44808	5.83709	6.84468	1.00759	4.62247	8.44431	-2.04192	0.0188679	0.446349	1.03319	1.52289
MAB_0538	1.15962	7.20853	1.03278	4.28505	4.46308	3.63695	4.91465	1.27769	4.63199	3.95814	-0.51582	0	-0.109799	1.14258	0.966746
MAB_0539	4.98065	9.83867	0.865837	7.56423	7.61309	6.87158	8.18712	1.31554	4.6569	3.07382	-0.0193444	0	-0.150101	1.01594	0.926443
MAB_0540	3.95254	8.81468	1.11371	6.29749	6.06655	5.38499	7.17778	1.79279	4.64811	2.15151	0.36582	0	0.08441	1.0293	1.16095
MAB_0541	5.41217	9.02968	0.704811	7.48436	7.3711	6.86841	7.98106	1.11265	4.65905	2.68687	0.185715	0	-0.310889	1.0157	0.765656
MAB_0542	2.54496	7.58924	0.747908	6.0775	6.15679	5.61367	6.46992	0.856249	4.65546	6.47164	-0.985712	0	-0.287127	1.03503	0.789417
MAB_0543	5.01653	9.085	0.671201	7.35851	7.25527	6.9162	7.86643	0.950227	4.65925	4.11611	-0.308969	0	-0.343837	1.01504	0.732708
MAB_0544	6.68973	10.3562	0.720725	8.90144	8.81028	8.34774	9.42832	1.08058	4.66018	2.56491	0.0115716	0	-0.3194	1.04013	0.757145
MAB_0545	6.36353	11.7695	1.05091	9.0792	8.9118	8.58451	9.61045	1.02594	4.65686	3.36466	0.414062	0	0.00663264	1.04427	1.08318
MAB_0546	8.31245	14.17	0.844502	11.4349	11.4434	11.144	11.755	0.610951	4.66071	7.84922	-0.135028	0	-0.294033	1.13854	0.782511
MAB_0547c	0	7.03688	1.03306	5.11799	5.20987	4.62132	5.78769	1.16637	4.63795	7.61857	-1.37241	0.00943396	-0.0482789	1.08134	1.02827
MAB_0548c	0	5.57029	1.01084	3.8449	4.08712	3.48293	4.51332	1.03039	4.62247	3.96965	-0.881973	0.00943396	-0.16543	1.17627	0.911114
MAB_0549c	2.62835	8.0103	1.42544	5.551	5.33052	4.33975	6.82079	2.48104	4.62996	1.76606	-0.0442522	0	0.369934	1.05551	1.44648
MAB_0550	5.82427	10.5234	1.03842	9.01538	9.0941	8.36134	9.8059	1.44456	4.65663	3.29927	-0.739413	0	-0.00429099	1.04272	1.07225
MAB_0551	5.43323	10.5653	0.962579	8.90451	9.04251	8.13926	9.65889	1.51963	4.65743	3.41003	-0.861001	0	-0.0776125	1.04019	0.998932
MAB_0552c	7.16407	11.0084	0.829625	9.16465	9.19731	8.70961	9.72692	1.0173	4.65932	2.90108	-0.340327	0	-0.216855	1.04648	0.85969
MAB_0553c	4.95421	10.2534	0.728134	7.83875	7.88197	7.51153	8.2626	0.75107	4.65902	7.03771	-0.752782	0	-0.289411	1.01755	0.787133
MAB_0554	2.35368	6.79487	0.670735	4.51366	4.51467	4.13032	4.87372	0.743396	4.6524	4.93887	0.181652	0	-0.454218	1.12495	0.622326
MAB_0555	1.75486	5.89764	0.692818	4.10711	4.15753	3.75194	4.5687	0.816762	4.64843	4.59581	-0.662152	0	-0.4636	1.15642	0.612945
MAB_0557	2.58589	7.69374	1.06308	5.14155	4.97872	4.39477	6.05356	1.65879	4.64192	2.4872	0.0456115	0	-0.0165941	1.07967	1.05995
MAB_0558c	3.71544	7.4167	0.597244	5.40583	5.43737	5.03952	5.80909	0.76957	4.65735	4.32184	0.0184583	0	-0.465454	1.0627	0.611091
MAB_0559	2.97198	10.255	0.975494	5.51657	5.49123	5.04001	5.91376	0.873752	4.64856	9.76533	1.3381	0	-0.0815632	1.05706	0.994981
MAB_0560	6.71868	10.7318	0.870907	8.28097	8.17049	7.65722	8.57852	0.921298	4.65808	3.25006	0.767744	0	-0.15651	1.02742	0.920034
MAB_0561	8.02068	12.0196	0.753211	10.3969	10.4243	9.99384	10.9659	0.97203	4.6608	3.27497	-0.517925	0	-0.337299	1.09051	0.739245
MAB_0562c	3.48475	7.90344	0.794466	5.97385	6.01462	5.65962	6.41374	0.754118	4.65446	3.558	-0.313477	0	-0.243887	1.03835	0.832657
MAB_0563	6.00289	11.586	1.19793	8.38868	8.03578	7.43437	9.39095	1.95658	4.65355	2.53441	0.60099	0	0.167817	1.03011	1.24436
MAB_0564c	4.13949	8.12511	0.881631	6.26286	6.19786	5.77878	6.74484	0.966058	4.65348	3.02383	-0.083221	0	-0.148549	1.03018	0.927995
MAB_0565c	4.05703	8.93192	0.964076	6.63578	6.57424	6.01899	7.0053	0.986307	4.65301	3.27034	0.281307	0	-0.0568237	1.0209	1.01972
MAB_0566c	3.42946	8.27157	0.81634	5.7486	5.75061	5.26745	6.18702	0.919567	4.6535	4.50968	0.414717	0	-0.230603	1.04694	0.845941
MAB_0567c	6.93979	10.9731	0.750006	9.5625	9.61108	9.11345	10.0842	0.970719	4.66031	4.97175	-0.853331	0	-0.308387	1.05839	0.768158
MAB_0568	8.28114	12.5582	0.858786	10.5413	10.4716	10.0572	11.0154	0.958296	4.66016	3.17871	0.223053	0	-0.238026	1.09681	0.838518
MAB_0569	5.06166	9.69503	0.716835	7.89345	7.90004	7.30712	8.41763	1.1105	4.65927	4.1584	-0.437071	0	-0.301584	1.01842	0.77496
MAB_0570	3.80228	8.37057	0.848185	6.41262	6.38664	5.85739	6.98298	1.12559	4.65463	3.46316	-0.12668	0	-0.17819	1.02638	0.898354
MAB_0571	7.06719	10.2784	0.616826	8.94813	8.99654	8.51757	9.3449	0.827324	4.66106	2.96288	-0.310034	0	-0.42433	1.04116	0.652214
MAB_0572	6.06725	9.69724	0.739169	7.59248	7.55969	7.23025	8.18231	0.95206	4.65872	2.81728	-0.0591415	0	-0.276796	1.01596	0.799749
MAB_0573	4.6063	6.84157	0.464236	5.71408	5.66015	5.4085	6.05965	0.651159	4.66017	2.67365	0.10926	0	-0.584151	1.04839	0.492393
MAB_0574c	3.78889	8.07287	0.808298	5.75944	5.78426	5.19379	6.25433	1.06054	4.65371	3.05745	0.258331	0	-0.238198	1.0465	0.838347
MAB_0575c	4.66458	9.42762	0.97867	6.87125	6.71985	6.31109	7.12542	0.814334	4.65363	3.51099	0.725633	0	-0.0372641	1.01593	1.03928
MAB_0576c	5.10809	8.53803	0.740437	6.24975	6.03221	5.76249	6.42569	0.663192	4.65678	4.09155	1.27166	0	-0.290074	1.03051	0.78647
MAB_0577c	4.57956	10.7491	1.63348	6.96327	6.41971	5.86976	7.99818	2.12842	4.63738	2.44503	0.809871	0	0.61876	1.01472	1.6953
MAB_0578c	5.15829	8.35686	0.750506	7.06246	7.12774	6.53944	7.71454	1.1751	4.65776	2.35033	-0.313545	0	-0.263638	1.01414	0.812906
MAB_0579c	1.86911	7.89734	0.851062	5.41608	5.42367	4.85592	5.88842	1.0325	4.65076	5.72124	-0.121693	0	-0.211067	1.06213	0.865477
MAB_0580	4.42421	7.60377	0.733631	6.15925	6.19574	5.60211	6.72378	1.12167	4.65634	2.37789	-0.121153	0	-0.299144	1.03278	0.777401
MAB_0581c	2.07116	6.29089	0.892059	3.36567	3.23239	2.70789	3.8686	1.1607	4.63093	4.69479	1.20176	0	-0.317514	1.20957	0.75903
MAB_0582c	0	6.23186	0.8347	4.63655	4.64135	4.2174	4.9032	0.685803	4.64286	10.6823	-1.31317	0.00943396	-0.281057	1.11576	0.795488
MAB_0583c	2.00551	5.65399	0.716824	3.9919	3.99571	3.5467	4.537	0.990299	4.64699	2.9715	-0.205211	0	-0.448441	1.16527	0.628103
MAB_0584	3.72898	7.80538	0.808492	5.7758	5.76099	5.3204	6.25631	0.935911	4.65368	3.15576	0.105692	0	-0.237333	1.04583	0.839211
MAB_0585	4.45205	7.72455	0.608854	5.92851	5.76726	5.55899	6.16753	0.608544	4.65832	3.64845	0.783707	0	-0.431091	1.03994	0.645454
MAB_0586	3.05866	6.29421	0.644692	4.8529	4.79484	4.49422	5.23175	0.737531	4.65462	3.36627	0.0459595	0	-0.455679	1.10037	0.620865
MAB_0587	4.67232	9.14946	0.739004	7.11455	7.12535	6.6015	7.56772	0.966222	4.65799	3.93476	-0.324801	0	-0.275076	1.01408	0.801469
MAB_0588c	3.55988	7.32282	0.66956	5.82721	5.80711	5.40822	6.41036	1.00214	4.65672	3.53632	-0.486798	0	-0.374205	1.04376	0.702339
MAB_0589	3.53562	9.79129	1.11516	7.21322	7.42876	6.54968	8.06789	1.51821	4.65099	3.51527	-0.674102	0	0.100875	1.01429	1.17742
MAB_0590c	5.11922	7.73947	0.487395	6.62505	6.58102	6.3334	6.95881	0.625407	4.66073	3.43915	-0.30772	0	-0.533756	1.02115	0.542789
MAB_0591	1.06671	11.5811	1.09938	4.95935	5.032	4.44925	5.54267	1.09342	4.6395	14.9702	1.46774	0	0.00661649	1.09276	1.08316
MAB_0592c	0	9.486	1.09632	5.25662	5.34209	4.78153	5.86805	1.08652	4.63744	8.78417	-0.555706	0.00943396	0.0244991	1.07182	1.10104
MAB_0593c	2.77464	6.39093	0.652727	5.41776	5.46318	5.11875	5.83183	0.71308	4.65568	6.3196	-1.47329	0	-0.40931	1.06204	0.667235
MAB_0594c	1.14523	5.73983	0.676071	3.60725	3.62973	3.2582	3.97965	0.721449	4.64473	6.04511	-0.452158	0	-0.517176	1.19325	0.559369
MAB_0595c	4.10555	9.23998	0.76248	7.06265	7.08557	6.6648	7.49289	0.82809	4.65749	4.95385	-0.563903	0	-0.251664	1.01414	0.82488
MAB_0596c	0.317189	5.05985	0.882001	2.47868	2.34836	1.89847	3.07592	1.17745	4.5984	3.12129	0.315492	0	-0.381887	1.26389	0.694657
MAB_0597	5.77435	9.87004	0.573213	7.33718	7.37472	7.05122	7.61511	0.563893	4.66047	6.872	0.888542	0	-0.441701	1.01491	0.634843
MAB_0598	5.01446	7.63319	0.498607	6.59177	6.67027	6.3752	6.89384	0.518639	4.66054	3.76114	-0.7454	0	-0.523332	1.02194	0.553212
MAB_0599	5.73483	10.3866	0.725825	6.93995	6.76481	6.47062	7.13013	0.659508	4.65831	8.06487	1.85753	0	-0.289136	1.01496	0.787408
MAB_0600	6.96709	10.9837	0.772419	9.32253	9.41468	8.97188	9.86304	0.891153	4.65995	4.01532	-0.798687	0	-0.278475	1.05089	0.79807
MAB_0601	5.21301	10.523	0.818284	7.28919	7.21767	6.85407	7.80608	0.952012	4.65728	5.45096	0.62148	0	-0.19636	1.01464	0.880184
MAB_0602c	0.530767	7.22451	1.57984	3.88692	3.90608	2.62101	5.0382	2.41719	4.57763	2.20364	0.145343	0	0.40667	1.17317	1.48321
MAB_0603c	3.88671	8.72438	0.820109	6.22922	6.19262	5.79019	6.52775	0.737555	4.65501	5.59413	0.751673	0	-0.210919	1.03103	0.865626
MAB_0604c	2.36483	8.23206	0.816989	4.87797	4.87044	4.43225	5.38068	0.948428	4.64957	6.36409	0.532127	0	-0.281611	1.0986	0.794933
MAB_0605c	1.66245	6.30324	0.963555	4.3544	4.38893	3.63439	5.15786	1.52347	4.63805	2.4002	-0.302355	0	-0.173636	1.13719	0.902909
MAB_0606c	1.44692	5.13262	0.833545	3.61253	3.86071	2.93454	4.20836	1.27383	4.63537	2.497	-0.478422	0	-0.359335	1.19288	0.71721
MAB_0607	2.00952	7.35294	1.0603	5.09318	5.38729	4.62918	5.76632	1.13714	4.64002	3.59041	-0.821565	0	-0.0228086	1.0831	1.05374
MAB_0608	1.81642	6.28473	0.820484	4.88481	5.01137	4.43748	5.44913	1.01165	4.64824	4.3669	-1.03879	0	-0.27763	1.09811	0.798914
MAB_0609c	2.31112	6.78469	0.714464	4.62533	4.59098	4.24792	5.12785	0.879933	4.65126	4.22401	-0.230863	0	-0.40212	1.11658	0.674425
MAB_0610	1.90919	5.795	0.731051	4.34222	4.38057	3.9644	4.84703	0.882623	4.64858	3.7294	-0.63304	0	-0.407085	1.13814	0.66946
MAB_0611	2.12919	7.23781	0.691442	5.7153	5.87911	5.19782	6.11247	0.914647	4.65552	8.60654	-1.51166	0	-0.356895	1.04834	0.71965
MAB_0612c	1.39808	7.0578	1.05791	3.86886	3.77039	3.17069	4.27412	1.10343	4.62758	3.91366	0.8032	0	-0.116596	1.17451	0.959949
MAB_0613	5.10266	8.41797	0.660171	6.99089	7.10435	6.60795	7.42186	0.813903	4.65898	2.96251	-0.191605	0	-0.354323	1.01449	0.722222
MAB_0614	4.76555	7.82154	0.628443	6.35901	6.45617	6.08484	6.65246	0.567625	4.65853	3.14979	-0.269798	0	-0.399294	1.02774	0.67725
MAB_0615	3.4744	7.34854	0.787418	5.8459	5.94897	5.51785	6.26358	0.745724	4.65405	3.62273	-0.711279	0	-0.255617	1.04303	0.820927
MAB_0616	1.82248	6.96283	1.05326	4.97871	5.24922	4.80732	5.45377	0.646448	4.63816	4.77123	-1.24804	0	-0.0380982	1.09136	1.03845
MAB_0617	1.20819	6.87089	1.0443	4.84129	5.00979	4.43215	5.35759	0.925442	4.63771	4.23725	-0.941666	0	-0.0568865	1.10119	1.01966
MAB_0618	3.58211	7.4556	0.901639	5.72794	5.94742	5.02018	6.3055	1.28531	4.65072	2.56918	-0.467753	0	-0.146166	1.0478	0.930379
MAB_0619	1.51018	6.37882	0.832933	3.81996	3.88995	3.38026	4.39385	1.01359	4.63871	3.66361	-0.228413	0	-0.345169	1.1781	0.731376
MAB_0620c	2.45245	6.16382	0.701043	4.70454	4.7081	4.34475	5.1867	0.841948	4.6519	3.99984	-0.631782	0	-0.409761	1.1108	0.666784
MAB_0621c	3.28699	7.17892	0.742399	5.85711	5.92811	5.33482	6.34706	1.01223	4.65528	3.13559	-0.360487	0	-0.300203	1.0426	0.776341
MAB_0622c	3.02598	7.44968	0.939606	5.45385	5.33225	4.78587	6.15246	1.3666	4.6486	2.46384	0.062947	0	-0.120508	1.06011	0.956036
MAB_0623	1.96326	7.73079	1.25835	4.39592	4.14858	3.48117	5.33142	1.85025	4.62425	2.76845	0.697972	0	0.124373	1.13398	1.20092
MAB_0624	5.21703	8.59268	0.66825	6.96751	7.01963	6.62619	7.42333	0.797146	4.65883	3.07353	-0.190683	0	-0.346434	1.01468	0.730111
MAB_0625	4.96165	7.73746	0.635038	6.80381	6.89768	6.41464	7.30606	0.891419	4.65901	2.99135	-0.732561	0	-0.382189	1.01723	0.694355
MAB_0626	4.54635	6.96992	0.51953	5.97351	6.10181	5.70886	6.34802	0.639153	4.65958	3.3427	-0.847317	0	-0.518834	1.03836	0.55771
MAB_0627c	0	6.36743	1.46928	3.53861	4.0318	2.25288	4.6487	2.39582	4.56708	1.97051	-0.202724	0.00943396	0.271303	1.19797	1.34785
MAB_0628	8.5879	13.0555	0.956499	10.711	10.761	10.0915	11.26	1.16859	4.65949	2.70624	0.083242	0	-0.147921	1.10442	0.928624
MAB_0629	1.70156	6.29095	0.858381	4.71357	4.90317	4.49026	5.12945	0.639193	4.64408	7.31938	-1.91366	0	-0.251773	1.11015	0.824772
MAB_0630	4.16327	10.0707	1.10335	8.14748	8.36163	7.96251	8.64613	0.683618	4.65312	8.83172	-2.1955	0	0.0793498	1.024	1.15589
MAB_0631c	1.21292	5.5854	0.973898	3.76652	3.82302	3.0928	4.66838	1.57559	4.62873	2.08904	-0.224412	0	-0.208082	1.18198	0.868462
MAB_0632c	0	4.7377	0.89867	2.83742	2.90577	2.41343	3.42134	1.00791	4.6005	3.88935	-0.853349	0.0188679	-0.344062	1.24273	0.732483
MAB_0633c	0	6.19466	0.977111	4.65445	4.74014	4.21751	5.3575	1.13999	4.63568	7.0866	-1.52785	0.00943396	-0.137331	1.11444	0.939214
MAB_0634c	2.57481	7.30019	0.958851	5.65683	5.87291	5.08747	6.42551	1.33805	4.64822	3.46316	-0.849791	0	-0.0919876	1.05084	0.984557
MAB_0635c	0	6.45636	1.08576	4.95395	5.07759	4.45374	5.75274	1.299	4.63335	6.39488	-1.48892	0.00943396	-0.00739026	1.09315	1.06915
MAB_0636c	3.87553	10.0199	0.827004	6.80168	6.88398	6.31457	7.29165	0.977078	4.65602	6.10732	0.0432475	0	-0.190266	1.01727	0.886278
MAB_0637c	2.33804	7.80734	0.911039	5.13423	5.36852	4.67757	5.67177	0.994201	4.64645	5.05877	-0.942372	0	-0.169148	1.08019	0.907396
MAB_0638c	2.02122	6.58931	1.04179	5.29632	5.4693	4.89608	6.10337	1.20728	4.64176	4.72093	-1.30938	0	-0.0274651	1.06925	1.04908
MAB_0639c	3.63869	10.5432	0.953024	7.67499	7.69358	7.16514	8.21007	1.04493	4.65556	5.78741	-0.328945	0	-0.0629992	1.01602	1.01355
MAB_0640c	5.06709	8.69323	0.670355	7.01634	6.89535	6.62503	7.13198	0.506953	4.65898	3.9253	0.640609	0	-0.343975	1.01433	0.732569
MAB_0641	5.29318	10.1637	0.797106	6.94637	6.87396	6.38299	7.27234	0.889353	4.65716	5.72443	1.24521	0	-0.217786	1.01489	0.858759
MAB_0642	2.0191	6.35951	0.597754	4.84451	4.89961	4.41641	5.23894	0.822532	4.65547	6.56672	-0.806294	0	-0.503207	1.10096	0.573338
MAB_0643	5.74862	9.03135	0.530496	7.15847	7.1207	6.7689	7.47136	0.702464	4.66073	4.09729	0.308251	0	-0.483631	1.01413	0.592914
MAB_0644c	2.81639	6.72038	0.701827	4.89599	4.85526	4.49065	5.20529	0.714636	4.65328	3.88025	0.323928	0	-0.39549	1.09732	0.681054
MAB_0645c	4.7346	9.59445	0.82528	7.14918	7.02378	6.55977	7.70186	1.14209	4.6569	3.31586	0.410757	0	-0.18883	1.01411	0.887715
MAB_0646c	1.08165	7.91149	1.29801	4.17069	4.14305	3.3841	4.88454	1.50044	4.61474	3.47466	0.395259	0	0.146523	1.15149	1.22307
MAB_0647	2.12145	6.29063	0.719919	4.42679	4.48946	3.8318	4.88484	1.05304	4.65007	3.45733	-0.0690986	0	-0.411676	1.1316	0.664868
MAB_0648	3.8747	8.73419	0.939769	6.1819	6.06917	5.60044	6.66188	1.06144	4.65217	3.8604	0.583169	0	-0.0924399	1.03221	0.984105
MAB_0649c	2.29882	7.88728	0.719856	4.94769	4.90613	4.58811	5.27573	0.68762	4.65296	7.47078	0.542552	0	-0.373748	1.0936	0.702796
MAB_0650	7.63988	15.8417	1.75381	11.8766	11.9761	10.6959	13.1372	2.4413	4.65249	2.47183	-0.0914307	0	0.593983	1.15983	1.67053
MAB_0651c	2.41363	9.21224	1.22089	7.28629	7.46391	6.5706	8.16513	1.59453	4.64855	4.06261	-0.766002	0	0.206257	1.01463	1.2828
MAB_0652	6.80364	10.6109	0.821304	8.0942	8.08029	7.48375	8.65776	1.17401	4.65838	2.69372	0.366993	0	-0.201384	1.02269	0.875161
MAB_0653	3.86764	8.97821	0.790726	5.98452	5.9786	5.6248	6.41478	0.789981	4.65469	5.63767	0.0943241	0	-0.247264	1.03799	0.829281
MAB_0654	2.76615	6.70054	0.730985	4.73322	4.85072	4.32814	5.18477	0.856633	4.65125	3.94112	-0.287814	0	-0.377763	1.10875	0.698781
MAB_0655	0.459581	5.3751	0.826112	2.9468	2.89462	2.52572	3.42975	0.904034	4.62332	3.95145	0.319583	0	-0.409987	1.2361	0.666557
MAB_0656	2.86534	7.94975	0.820916	5.19799	5.10726	4.72346	5.67278	0.949319	4.65111	4.65097	0.389683	0	-0.254839	1.07575	0.821706
MAB_0657	2.63356	7.46628	0.901608	4.68405	4.70225	4.07867	5.35741	1.27874	4.64499	2.94698	0.184682	0	-0.210676	1.11228	0.865869
MAB_0658	5.96324	10.3441	0.784957	7.63503	7.59585	7.21391	8.02549	0.811576	4.65825	4.03037	0.439613	0	-0.230991	1.01595	0.845553
MAB_0659	0	10.8984	2.40066	5.13371	5.00765	3.16696	6.60071	3.43375	4.54931	2.71578	0.393947	0.00943396	1.32043	1.08022	2.39698
MAB_0660	0	10.9029	2.54816	4.99715	4.50744	2.70828	6.80192	4.09364	4.53102	2.38047	0.453904	0.00943396	1.45813	1.09003	2.53468
MAB_0661	2.41939	11.7214	2.41406	6.05024	5.99984	3.79135	7.94652	4.15518	4.58483	2.10109	0.394117	0	1.3782	1.03586	2.45474
MAB_0663	3.91255	12.8764	2.24282	7.33347	7.32581	5.37535	8.86572	3.49037	4.61761	2.26022	0.413431	0	1.22792	1.01489	2.30447
MAB_0664	0	10.5047	2.36978	3.75937	3.07411	1.97617	4.94845	2.97229	4.47155	3.48548	0.966325	0.0188679	1.18729	1.1825	2.26383
MAB_0665	0	10.5701	2.80982	4.36633	3.35018	2.19559	6.85682	4.66123	4.44241	2.0932	0.440049	0.0377358	1.67355	1.13627	2.75009
MAB_0666	0	10.01	2.57899	3.44499	2.66392	1.46584	5.16818	3.70234	4.38615	2.88799	0.863945	0.0377358	1.37468	1.20431	2.45123
MAB_0667	0	12.566	2.8551	6.29404	5.17856	4.2157	8.6705	4.4548	4.55827	2.20354	0.390432	0.00943396	1.82571	1.02939	2.90226
MAB_0668c	0	8.07677	2.0135	5.12116	5.14323	3.40753	7.12035	3.71282	4.5776	1.90315	-0.220564	0.00943396	0.932383	1.08111	2.00893
MAB_0669	2.03565	12.6132	2.75169	5.93015	5.8882	3.40356	7.82704	4.42348	4.55861	2.51269	0.583385	0	1.71181	1.03989	2.78835
MAB_0670	2.3486	9.23555	1.47833	5.87299	5.45485	4.78589	6.9716	2.1857	4.63221	2.64264	0.388875	0	0.436336	1.042	1.51288
MAB_0671	0	6.40755	1.28787	3.1825	3.13167	2.55241	3.96259	1.41018	4.56953	3.25609	0.087982	0.0283019	0.0664552	1.22142	1.143
MAB_0672c	4.38092	10.2519	0.833122	5.73904	5.67217	5.18666	6.14063	0.953972	4.65387	14.1302	2.44795	0	-0.214218	1.04734	0.862326
MAB_0673	5.49254	12.4561	0.985905	7.32807	7.3605	6.59208	7.89019	1.29811	4.65485	8.67668	1.39125	0	-0.0289565	1.01486	1.04759
MAB_0674	5.43307	12.4428	0.849651	7.30514	7.2018	6.94951	7.68689	0.737378	4.65704	14.2811	1.78649	0	-0.165081	1.01473	0.911463
MAB_0676c	1.21552	10.072	1.44886	6.51901	6.77397	6.1557	7.28876	1.13306	4.63615	4.5252	-0.779459	0	0.425148	1.02371	1.50169
MAB_0677c	4.06077	13.4906	2.07664	7.23994	6.76482	5.44492	8.68561	3.24069	4.62501	3.79913	1.00597	0	1.06224	1.0144	2.13879
MAB_0678	0.867121	5.4314	0.817795	3.3552	3.24715	2.71988	3.89699	1.17711	4.63304	3.09745	0.0693544	0	-0.392467	1.21026	0.684078
MAB_0679c	3.93485	9.34079	1.16896	6.55873	6.73165	5.91662	7.26105	1.34442	4.64734	2.91007	-0.120148	0	0.146224	1.02274	1.22277
MAB_0680c	6.01204	11.4745	1.35192	9.01869	8.98625	8.39898	9.9479	1.54892	4.652	2.56581	-0.352278	0	0.309128	1.04279	1.38567
MAB_0681	3.66383	6.8722	0.712792	5.31	5.31362	4.85134	5.78392	0.932579	4.65445	2.57454	0.0165992	0	-0.355598	1.06839	0.720946
MAB_0682	5.78012	9.02555	0.568658	7.3231	7.23737	7.00553	7.61429	0.608763	4.66048	3.63459	0.436051	0	-0.446175	1.01483	0.63037
MAB_0683c	4.10275	8.41526	0.822571	6.56419	6.38249	5.95831	7.14154	1.18322	4.65567	2.73498	0.215651	0	-0.200032	1.0226	0.876513
MAB_0684c	4.44927	8.96017	0.745103	7.61523	7.56678	7.18041	8.12621	0.9458	4.65856	4.97614	-0.614052	0	-0.270856	1.01596	0.805688
MAB_0685	3.84177	7.86626	0.71178	5.6031	5.5195	5.13526	6.09802	0.962762	4.65552	3.43663	0.4226	0	-0.34141	1.05319	0.735134
MAB_0686	3.36681	11.5793	1.60671	6.69168	7.07338	5.64012	7.89115	2.25103	4.63391	3.1444	-0.0612301	0	0.587093	1.01962	1.66364
MAB_0687	6.41663	9.5022	0.696649	8.30853	8.45887	8.03246	8.8302	0.79774	4.65986	3.18122	-0.882322	0	-0.331471	1.02812	0.745074
MAB_0688c	1.71766	5.95733	1.02253	3.91672	3.83763	3.06861	4.7975	1.72889	4.62918	1.91279	0.090736	0	-0.148415	1.17094	0.928129
MAB_0689	4.41066	8.9351	0.730201	7.10954	7.08248	6.73275	7.58226	0.849516	4.65813	3.86163	-0.274776	0	-0.283879	1.01408	0.792666
MAB_0690	5.76927	9.88641	1.10967	8.01841	8.31852	7.4333	8.83611	1.40281	4.65363	2.32034	-0.567891	0	0.0887471	1.02092	1.16529
MAB_0691	4.78315	10.6937	1.15557	7.33471	7.37797	6.58365	7.89274	1.3091	4.65123	4.08842	0.437793	0	0.140672	1.0149	1.21722
MAB_0692c	4.08937	9.89895	1.11091	7.15068	7.44751	6.13457	7.89119	1.75662	4.65104	2.65236	-0.484564	0	0.0967994	1.01411	1.17334
MAB_0693	3.92294	10.527	0.996597	6.91358	7.03185	6.27467	7.59079	1.31611	4.6531	5.2187	0.260403	0	-0.0186891	1.01529	1.05786
MAB_0694	1.70715	9.84962	1.27243	6.01434	5.92517	5.14304	6.6807	1.53765	4.64099	4.23542	0.328812	0	0.235433	1.037	1.31198
MAB_0695	5.98974	8.7253	0.614921	7.7042	7.7089	7.25484	8.15576	0.900926	4.66026	2.40108	-0.21953	0	-0.401237	1.01616	0.675308
MAB_0696c	2.60674	7.48144	0.791088	5.11608	5.19251	4.59404	5.5783	0.984254	4.65148	4.00009	0.119975	0	-0.290384	1.08147	0.78616
MAB_0697	6.50524	13.5486	1.13162	9.08613	9.28679	8.50812	9.65356	1.14543	4.65581	6.13708	0.508577	0	0.0871738	1.04445	1.16372
MAB_0698	7.18335	10.5642	0.679805	9.08392	9.22491	8.70441	9.50427	0.799867	4.66061	3.41766	-0.657065	0	-0.364588	1.04439	0.711956
MAB_0699c	6.86008	9.78899	0.565476	8.60698	8.57471	8.27276	9.00587	0.733118	4.66127	3.71393	-0.56253	0	-0.469169	1.03465	0.607376
MAB_0700c	4.04575	8.2022	0.732594	6.41563	6.58379	6.1446	6.8829	0.738309	4.6566	5.075	-1.22363	0	-0.293705	1.0263	0.782839
MAB_0701	6.54992	8.49912	0.362033	7.73468	7.78789	7.53157	7.95161	0.42004	4.66234	3.13316	-0.48388	0	-0.654332	1.01637	0.422212
MAB_0703c	6.6649	13.1734	0.884235	9.2615	9.38615	8.71734	9.82097	1.10363	4.65896	6.80107	0.509014	0	-0.164902	1.04914	0.911643
MAB_0704c	2.87148	7.53926	0.703779	5.19792	5.17973	4.87075	5.50469	0.633944	4.6543	4.85304	0.195065	0	-0.371981	1.07576	0.704563
MAB_0705	5.67064	9.3888	0.58602	7.82215	7.93006	7.57631	8.13399	0.557677	4.66059	4.62481	-0.752225	0	-0.431293	1.01731	0.645251
MAB_0706c	6.20585	9.81052	0.713604	7.55872	7.68023	6.88132	8.05427	1.17295	4.65905	2.97397	0.309906	0	-0.302324	1.01593	0.77422
MAB_0707	8.40999	11.6363	0.614467	10.4122	10.5509	10.218	10.8257	0.607666	4.66167	4.48433	-1.24619	0	-0.476705	1.09117	0.59984
MAB_0708	6.28659	10.4539	0.836459	9.16918	9.37543	8.89335	9.68492	0.791569	4.65905	6.61931	-1.79915	0	-0.210141	1.0466	0.866404
MAB_0709	2.29435	6.97012	1.04818	4.95735	4.94344	4.11583	5.68156	1.56573	4.64101	2.31594	0.0736662	0	-0.0447301	1.09291	1.03181
MAB_0710	3.68771	9.3951	0.927995	7.2941	7.38949	6.73541	7.81408	1.07867	4.65517	4.1126	-0.417242	0	-0.086676	1.01467	0.989869
MAB_0711	4.16645	7.40603	0.701817	5.57176	5.62747	5.10898	6.05685	0.94787	4.65553	2.58284	-0.00317707	0	-0.352765	1.05458	0.72378
MAB_0712c	3.67407	9.03475	0.785098	6.08595	6.17731	5.63651	6.49274	0.856239	4.65517	5.59716	0.267138	0	-0.249688	1.03479	0.826856
MAB_0713	8.20251	12.05	0.844096	10.606	10.7462	10.1024	11.1424	1.03994	4.66023	3.43144	-0.760854	0	-0.255594	1.09969	0.820951
MAB_0714c	0	6.58884	1.64301	3.64219	3.90163	2.35321	5.02421	2.67099	4.5381	2.36261	-0.290641	0.0471698	0.452197	1.19081	1.52874
MAB_0715c	2.58979	9.76837	1.0023	6.70226	6.75804	6.14949	7.203	1.05352	4.65197	5.61786	-0.182508	0	-0.0170816	1.01938	1.05946
MAB_0716c	4.9114	10.4366	0.980805	6.62249	6.36356	6.07925	6.86636	0.787111	4.65339	7.56065	1.97171	0	-0.0404054	1.02121	1.03614
MAB_0717	2.19372	12.982	2.25574	6.40635	5.60692	4.99437	7.51058	2.51621	4.60521	3.5398	0.94691	0	1.22921	1.02653	2.30575
MAB_0718c	3.95113	7.88637	0.936329	5.71354	5.67678	4.94943	6.34003	1.3906	4.65018	2.20172	0.229493	0	-0.112081	1.04841	0.964463
MAB_0719	3.96153	8.7879	0.851844	5.72626	5.65896	5.11672	6.31231	1.19558	4.65269	3.82837	0.629038	0	-0.196031	1.04788	0.880514
MAB_0720	2.43548	7.19843	1.03246	5.6783	5.87648	4.99409	6.52694	1.53285	4.6461	2.94232	-0.632893	0	-0.0174496	1.04991	1.05909
MAB_0721	3.66869	7.46458	0.993292	5.74902	5.72114	5.03764	6.60163	1.56399	4.64843	1.96055	-0.0856725	0	-0.0536341	1.04693	1.02291
MAB_0722	1.90709	8.73681	1.07883	6.0752	6.17528	5.17316	6.95591	1.78275	4.64681	3.94045	-0.597702	0	0.0437311	1.0351	1.12028
MAB_0723c	3.30006	9.42452	1.11249	5.44772	5.33077	4.9125	5.79545	0.882948	4.64356	4.44202	0.923309	0	0.0520584	1.06043	1.1286
MAB_0724c	3.2087	7.55285	0.782901	5.96433	5.8911	5.38565	6.70625	1.3206	4.65469	3.08405	-0.341722	0	-0.255779	1.03868	0.820766
MAB_0725c	0.873036	7.72898	1.05232	3.63598	3.53725	3.08671	3.9922	0.905495	4.62285	6.66879	1.06188	0	-0.138928	1.19125	0.937617
MAB_0726	1.82158	6.8101	0.857699	4.47745	4.47361	3.83369	5.07713	1.24344	4.64467	3.87652	-0.0789794	0	-0.270011	1.12771	0.806534
MAB_0727	1.5775	5.31976	0.571513	3.81351	3.8557	3.45224	4.18855	0.73631	4.65162	5.10277	-0.751537	0	-0.60706	1.17857	0.469485
MAB_0728	5.50495	11.2184	0.972834	9.4882	9.63295	8.94442	10.1646	1.2202	4.65804	4.39451	-0.821394	0	-0.08314	1.05597	0.993404
MAB_0729c	5.84423	10.7783	1.00009	9.14143	9.3866	8.82783	9.76602	0.938194	4.65716	4.64001	-1.34575	0	-0.0457817	1.04587	1.03076
MAB_0730c	5.26879	9.53552	0.754358	6.88223	6.8391	6.38652	7.32924	0.942723	4.65757	4.29823	0.60045	0	-0.261392	1.01575	0.815153
MAB_0731	2.04225	8.78553	1.11891	6.30211	6.37653	5.67084	6.97385	1.30301	4.64683	4.64792	-0.508179	0	0.0897286	1.02919	1.16627
MAB_0732c	5.36183	13.7707	1.71971	7.98861	7.69824	7.11643	8.29388	1.17745	4.64253	6.53412	1.76983	0	0.699445	1.02027	1.77599
MAB_0733	3.9898	12.5938	2.04132	6.74329	6.44848	5.03528	7.89856	2.86328	4.62065	3.58142	0.977815	0	1.02283	1.01849	2.09937
MAB_0734	0.0583615	9.64867	1.88395	3.07852	2.65515	1.7926	3.74673	1.95413	4.50371	5.93168	1.67939	0	0.655979	1.22797	1.73252
MAB_0735	0	7.31118	1.31441	2.11024	1.8573	1.24325	2.80165	1.5584	4.48876	6.47956	1.56875	0.00943396	0.0293523	1.28506	1.1059
MAB_0736	0	5.78178	1.11682	1.81811	1.6489	1.19048	2.40344	1.21296	4.47154	5.17072	1.15861	0.0566038	-0.184964	1.30179	0.89158
MAB_0737c	0	5.63321	1.25254	2.16078	2.22995	1.11115	2.87127	1.76011	4.47824	2.87677	0.406534	0.0377358	-0.0296311	1.28217	1.04691
MAB_0738	4.76644	8.3612	0.645184	6.63106	6.63889	6.33257	7.05017	0.7176	4.65871	3.23155	-0.0975059	0	-0.375825	1.02101	0.70072
MAB_0739c	5.26821	10.3305	1.03503	8.22228	8.27769	7.61866	8.96175	1.34309	4.65534	3.17533	-0.541598	0	0.00912026	1.02591	1.08566
MAB_0740c	6.0516	11.4865	0.957782	8.76027	8.95846	8.41555	9.37967	0.964115	4.65728	3.98977	-0.859035	0	-0.0794925	1.03727	0.997052
MAB_0741c	2.09595	6.86505	1.13648	4.40242	4.31478	3.67515	5.23492	1.55977	4.63002	2.49048	0.184709	0	0.00300607	1.13347	1.07955
MAB_0742c	2.31006	7.86581	1.09035	4.68711	4.49304	4.14805	5.32074	1.17269	4.6373	4.01938	0.725401	0	-0.0217095	1.11206	1.05483
MAB_0743c	2.57535	7.62206	0.955587	5.74116	5.91651	5.32409	6.31055	0.986466	4.64886	3.82989	-0.722748	0	-0.0916657	1.04725	0.984879
MAB_0744	4.72219	9.64547	0.622189	6.58343	6.61168	6.39416	6.85262	0.458462	4.65916	12.4405	1.52108	0	-0.39995	1.02214	0.676594
MAB_0745	5.08583	8.2025	0.539606	6.44545	6.52351	6.13079	6.77126	0.640462	4.65996	3.93913	0.0322959	0	-0.485939	1.02555	0.590605
MAB_0746	2.91141	10.2626	1.32036	5.09138	4.84625	4.33255	5.54178	1.20923	4.63315	6.64722	1.65129	0	0.237124	1.08323	1.31367
MAB_0747	4.52423	9.64305	0.873981	6.12156	6.0671	5.73645	6.35199	0.61554	4.65396	8.02425	1.74134	0	-0.159793	1.03377	0.916751
MAB_0748	3.12507	8.46722	0.80816	6.05025	6.224	5.64983	6.4891	0.83927	4.6541	5.36325	-0.857835	0	-0.227701	1.03586	0.848844
MAB_0749	6.78885	12.2438	0.764056	8.41295	8.4305	8.00445	8.82717	0.822719	4.65947	8.55524	1.23524	0	-0.266635	1.03069	0.80991
MAB_0750	6.94852	9.35521	0.508664	8.11579	8.15515	7.80631	8.45936	0.653049	4.66148	2.64352	-0.216014	0	-0.514552	1.02322	0.561992
MAB_0751c	5.26793	9.44049	0.761036	7.27387	7.36144	6.73827	7.77945	1.04118	4.65797	3.38327	-0.0504049	0	-0.253528	1.01456	0.823017
MAB_0752c	7.91163	11.3366	0.908123	9.7643	10.0358	8.98469	10.5159	1.53126	4.65909	1.95096	-0.410285	0	-0.157246	1.06537	0.919299
MAB_0753c	7.27169	11.0349	0.917954	9.32509	9.29959	8.66484	10.1136	1.44877	4.6586	2.16085	-0.148956	0	-0.133016	1.05097	0.943528
MAB_0754c	7.45707	11.5696	1.23004	9.91442	10.2405	8.59812	10.9559	2.35773	4.65563	1.82533	-0.464614	0	0.159119	1.07092	1.23566
MAB_0755c	2.05317	9.00027	1.98012	5.78332	5.5001	4.05288	7.49811	3.44523	4.60389	1.60526	0.072632	0	0.934606	1.04552	2.01115
MAB_0756c	3.2728	7.58821	0.823226	6.07861	6.10035	5.46322	6.81667	1.35345	4.65404	3.34462	-0.499442	0	-0.211776	1.035	0.864768
MAB_0757	3.72604	8.08554	0.702737	5.59688	5.67339	5.21551	5.97795	0.762439	4.65567	4.18077	0.35271	0	-0.350729	1.05347	0.725815
MAB_0758	0	6.20083	1.04346	3.08622	3.14854	2.35301	3.90021	1.5472	4.59907	3.43257	-0.207999	0.00943396	-0.184031	1.22749	0.892514
MAB_0759c	4.89892	12.3787	1.16222	6.81231	6.5753	6.23678	7.10032	0.863543	4.65035	9.99147	2.24052	0	0.145158	1.01706	1.2217
MAB_0760c	3.47473	12.4108	1.34713	6.39106	6.04714	5.73259	6.95992	1.22733	4.64354	9.23025	2.05694	0	0.320204	1.02692	1.39675
MAB_0761c	2.79257	12.0143	1.63787	5.29621	5.01648	4.15016	5.99613	1.84597	4.62227	8.96367	2.13756	0	0.568615	1.06926	1.64516
MAB_0762	4.52709	8.47029	0.71506	6.14738	5.96087	5.75951	6.53459	0.775079	4.65687	3.93171	0.715148	0	-0.318023	1.03308	0.758522
MAB_0763c	4.03131	8.81505	0.9702	6.57119	6.51618	6.08946	7.38681	1.29735	4.65229	3.2761	-0.385026	0	-0.0522338	1.02243	1.02431
MAB_0764c	1.08573	11.7553	1.47445	4.40792	4.278	3.61147	4.78957	1.1781	4.61671	14.2621	2.78076	0	0.341401	1.13305	1.41795
MAB_0765	1.47808	8.03078	1.29881	3.86601	3.63734	3.01913	4.38208	1.36295	4.61061	4.33436	1.04604	0	0.124095	1.17472	1.20064
MAB_0766	2.3194	9.87306	1.73049	5.69783	5.00018	4.40349	6.57381	2.17032	4.62065	3.05874	0.999075	0	0.681418	1.04908	1.75796
MAB_0767c	2.99092	10.1833	1.49492	5.62342	5.35603	4.79462	5.95106	1.15645	4.6309	4.45776	1.25439	0	0.442621	1.0523	1.51917
MAB_0768	5.53009	10.6992	0.945539	7.79396	7.81033	7.20302	8.29701	1.09399	4.65621	3.91698	0.414862	0	-0.0714154	1.01695	1.00513
MAB_0769c	1.00994	7.21962	1.25897	4.12976	4.25302	3.13016	5.09313	1.96297	4.6156	2.66602	0.0731257	0	0.104306	1.15466	1.18085
MAB_0770	2.00599	6.89827	0.998673	4.58351	4.71751	3.86242	5.22132	1.35891	4.63933	3.05365	0.00146111	0	-0.121018	1.11969	0.955526
MAB_0771c	0.211195	6.68548	1.43562	3.09821	3.04518	1.85744	4.18291	2.32547	4.55288	2.12447	0.278753	0	0.208882	1.22674	1.28543
MAB_0773	0.862272	5.79077	0.857231	3.86169	3.79306	3.32853	4.48752	1.15899	4.63773	3.34125	-0.18854	0	-0.317805	1.17504	0.758739
MAB_0774c	0	10.7956	1.65467	4.34914	4.24397	3.39064	5.27071	1.88007	4.58754	4.58776	0.501408	0.00943396	0.517075	1.1376	1.59362
MAB_0775	3.43418	7.6452	0.872826	5.13794	5.03837	4.44436	5.86934	1.42498	4.64923	2.55	0.306107	0	-0.207101	1.07993	0.869444
MAB_0776	2.56009	6.28032	0.658645	4.63233	4.60488	4.17557	5.14155	0.965985	4.65336	3.03942	0.0916419	0	-0.457423	1.11607	0.619122
MAB_0777	0	4.92091	0.947142	2.89143	3.02026	2.5188	3.4338	0.914999	4.59484	4.19629	-0.86394	0.0188679	-0.292327	1.23947	0.784217
MAB_0778	4.87204	8.32809	0.621887	6.97115	6.87348	6.62859	7.37068	0.742098	4.65945	3.3353	-0.221035	0	-0.392765	1.01465	0.68378
MAB_0779	2.67812	6.91084	0.696467	4.09354	3.99811	3.65019	4.4628	0.812611	4.64975	5.65135	1.17963	0	-0.461	1.15747	0.615544
MAB_0780	3.66803	7.24567	0.675375	5.53427	5.49319	5.08062	5.98495	0.904328	4.65604	2.88463	0.0962147	0	-0.380884	1.05626	0.695661
MAB_0781	3.28301	8.42768	0.663691	6.23679	6.2377	5.91159	6.53618	0.624595	4.65773	6.74948	-0.0995283	0	-0.367147	1.03084	0.709398
MAB_0782	4.88343	10.549	1.04257	7.28979	7.13473	6.60555	7.76587	1.16032	4.65349	3.44227	0.603973	0	0.0279182	1.01465	1.10446
MAB_0783c	1.258	8.14485	1.91943	5.118	4.9862	3.36136	7.38407	4.02271	4.59122	1.63018	0.0622414	0	0.838098	1.08134	1.91464
MAB_0785	4.85243	8.2338	0.908418	6.7053	6.54876	5.9312	7.5762	1.645	4.65431	1.6654	0.0129669	0	-0.110898	1.01932	0.965646
MAB_0786	1.92157	6.22383	0.743609	4.83568	4.92097	4.44122	5.37687	0.935646	4.65072	5.31958	-1.09695	0	-0.35797	1.10158	0.718574
MAB_0787	3.13218	6.58325	0.622255	4.60912	4.61891	4.1805	5.04161	0.861109	4.65439	3.34577	0.162679	0	-0.495529	1.11778	0.581015
MAB_0788	3.27165	5.95061	0.548915	4.74113	4.76281	4.31608	5.13423	0.818145	4.65674	2.754	-0.0806108	0	-0.559271	1.10819	0.517274
MAB_0789	4.77977	8.13006	0.672478	6.99262	7.16249	6.58067	7.43535	0.854678	4.6587	3.50835	-0.859895	0	-0.342003	1.01448	0.734541
MAB_0790	3.66738	8.55496	0.746522	5.19712	5.23035	4.72043	5.52402	0.803586	4.65372	8.21712	1.48464	0	-0.329292	1.07581	0.747253
MAB_0791	2.65382	8.00845	1.02909	5.29762	5.28578	4.85778	5.68311	0.825328	4.64452	3.31819	0.137128	0	-0.0400773	1.06917	1.03647
MAB_0792	0	5.8892	0.887033	4.06529	4.26992	3.70031	4.54405	0.843735	4.62982	9.92411	-1.99674	0.0188679	-0.272613	1.15965	0.803932
MAB_0793	0	3.06873	0.529347	1.79406	1.76569	1.54984	2.14116	0.591323	4.61392	3.81534	-0.304555	0.00943396	-0.773825	1.30317	0.302719
MAB_0794	0	6.45262	1.12041	3.77451	4.00415	3.30313	4.43865	1.13552	4.60772	4.50651	-0.97218	0.0188679	-0.0609955	1.1814	1.01555
MAB_0795	6.58071	9.36481	0.441237	7.77533	7.76134	7.52437	8.00862	0.484249	4.66185	5.07311	0.488993	0	-0.575507	1.01674	0.501037
MAB_0796c	3.33689	8.03887	0.995041	6.13257	6.23196	5.69374	6.7802	1.08646	4.6496	3.65753	-0.772763	0	-0.0384346	1.03348	1.03811
MAB_0797c	1.521	6.87039	0.599008	4.78915	4.80028	4.48117	5.05508	0.573908	4.65499	11.6306	-1.06016	0	-0.505799	1.10481	0.570746
MAB_0798c	2.81365	7.40487	0.682612	5.19649	5.20045	4.78642	5.65538	0.868959	4.65469	4.69676	-0.214512	0	-0.393245	1.07586	0.6833
MAB_0799c	6.17018	9.68596	0.752689	7.6078	7.51026	7.09242	8.29534	1.20292	4.6586	2.36642	0.141288	0	-0.263275	1.01596	0.813269
MAB_0800	1.32634	10.5609	2.4153	4.91652	4.25661	2.73458	6.73547	4.0009	4.54545	2.26418	0.551214	0	1.31945	1.09585	2.396
MAB_0801	1.38481	8.98897	1.56863	5.27621	5.08401	4.37703	6.28832	1.91129	4.61887	2.62615	0.23823	0	0.49809	1.07054	1.57463
MAB_0802	0	7.18153	1.45528	3.78631	3.83614	2.69703	4.89042	2.19339	4.58163	2.52796	-0.103164	0.00943396	0.274726	1.18055	1.35127
MAB_0803	3.24461	8.92362	1.04454	6.23735	6.24101	5.46861	6.9448	1.47618	4.64932	2.81114	-0.0394734	0	0.0137172	1.03082	1.09026
MAB_0804	1.8117	6.47045	0.934794	4.42751	4.47987	3.94117	4.9616	1.02043	4.64001	3.60539	-0.392887	0	-0.196746	1.13154	0.879798
MAB_0805	2.72036	5.92549	0.542418	4.73773	4.8308	4.41847	5.10444	0.685972	4.65674	3.71152	-0.594306	0	-0.56601	1.10843	0.510534
MAB_0806	2.72121	6.2152	0.69967	4.54678	4.51981	4.084	5.03486	0.950859	4.65151	2.84179	-0.0983412	0	-0.422778	1.12245	0.653767
MAB_0807	3.45411	7.43264	0.828783	5.59615	5.46536	5.08571	6.16047	1.07476	4.6526	2.93482	0.26942	0	-0.224715	1.0535	0.851829
MAB_0808c	0	5.1608	1.4898	2.46295	2.77365	1.29275	3.63812	2.34536	4.43005	1.8223	-0.208035	0.0849057	0.224999	1.2648	1.30154
MAB_0809c	1.06091	9.80707	2.02018	5.06123	4.5242	3.87238	6.39785	2.52547	4.58463	2.46671	0.501503	0	0.934784	1.0854	2.01133
MAB_0810c	2.63114	7.57128	1.09605	4.73307	4.6744	3.75846	5.21105	1.45258	4.63726	2.71987	0.47368	0	-0.0127061	1.10876	1.06384
MAB_0811	2.17323	10.2734	1.56477	4.59783	4.47187	3.7666	5.20471	1.43811	4.61013	5.81098	1.30381	0	0.446145	1.11862	1.52269
MAB_0812	5.74728	11.2461	0.885367	7.93049	7.87141	7.32732	8.43864	1.11133	4.65735	3.94975	0.583872	0	-0.133727	1.01909	0.942818
MAB_0813c	0.977568	8.49065	0.901487	3.82381	3.6688	3.43382	4.04345	0.60963	4.63806	12.5705	2.07673	0	-0.276333	1.17782	0.800212
MAB_0815	0.600539	7.49413	1.23749	3.50139	3.42434	2.68503	4.22332	1.53829	4.60022	3.41634	0.416189	0	0.0369817	1.20051	1.11353
MAB_0816	1.02217	6.73896	1.08347	3.87537	3.7929	3.26023	4.46431	1.20408	4.62304	3.07168	0.0329179	0	-0.0905514	1.17402	0.985993
MAB_0817	0	8.15756	1.31605	5.03945	5.14393	4.46165	5.86279	1.40114	4.62282	4.84339	-0.780126	0.00943396	0.229082	1.08697	1.30563
MAB_0818	0	7.68735	1.17113	4.72868	4.70977	4.27443	5.34444	1.07002	4.62711	5.38514	-0.69818	0.00943396	0.0620584	1.10907	1.1386
MAB_0819	1.1859	6.65088	1.08564	3.69505	3.86824	3.00192	4.32675	1.32483	4.61858	2.93167	-0.0219635	0	-0.101448	1.18709	0.975096
MAB_0820c	2.97426	9.32789	0.990027	5.85068	5.67073	5.29899	6.29113	0.99214	4.64972	5.20562	0.967697	0	-0.052823	1.04285	1.02372
MAB_0821	2.37707	14.0047	1.66477	5.79868	5.36845	4.92921	6.1012	1.17198	4.62951	14.2011	2.97773	0	0.619868	1.0449	1.69641
MAB_0822	1.46511	7.72514	0.924994	5.00341	4.85873	4.39743	5.58314	1.18571	4.64597	4.89206	0.0626603	0	-0.164579	1.08957	0.911965
MAB_0823	3.31411	8.42779	0.880825	6.50393	6.45236	5.96373	7.0333	1.06957	4.65399	4.90166	-0.463683	0	-0.143258	1.02408	0.933287
MAB_0824	2.85635	7.8462	0.63175	5.78171	5.78589	5.45734	6.09766	0.640314	4.65737	8.2176	-0.191178	0	-0.413835	1.04558	0.66271
MAB_0825	2.8496	7.72831	0.812642	5.57022	5.56158	5.07054	6.06547	0.994931	4.65268	4.19979	-0.091386	0	-0.242008	1.05465	0.834536
MAB_0826c	4.50669	10.034	0.923558	7.65755	7.67282	7.00955	8.32113	1.31157	4.65609	3.47766	-0.266753	0	-0.0924164	1.01597	0.984128
MAB_0827	4.21348	13.3221	1.60479	6.37701	5.94075	5.21023	6.89401	1.68378	4.63512	6.40062	1.71278	0	0.577509	1.02728	1.65405
MAB_0828	0	8.53583	1.49014	3.99775	3.98411	3.2403	4.81785	1.57755	4.57365	4.52325	-0.323236	0.0471698	0.325316	1.16482	1.40186
MAB_0829	1.13381	8.50536	1.02414	4.31216	4.47311	3.70363	4.82816	1.12454	4.6339	5.86773	0.0226369	0	-0.116327	1.14047	0.960217
MAB_0830	6.16569	12.841	1.04016	7.91229	7.62201	7.29648	8.23863	0.942154	4.65533	6.9965	1.55778	0	0.0214009	1.01875	1.09795
MAB_0831	5.57625	9.82684	0.70275	7.37859	7.37066	7.0232	7.70777	0.684574	4.65898	4.49677	0.44595	0	-0.312404	1.01515	0.76414
MAB_0832	5.37387	9.30767	0.71079	6.68804	6.70705	6.21214	7.18019	0.968046	4.65787	3.4685	0.288651	0	-0.308912	1.0197	0.767632
MAB_0833	3.45977	7.64585	0.572116	4.74926	4.6712	4.40262	5.05406	0.651442	4.65648	7.86793	1.1591	0	-0.535493	1.10761	0.541052
MAB_0834	3.69789	7.01411	0.596877	5.1168	5.15076	4.75782	5.44055	0.682732	4.65666	3.23184	0.0347281	0	-0.484545	1.08142	0.592
MAB_0835c	0	4.9389	0.890736	3.29291	3.5254	2.90928	3.83125	0.921973	4.61202	6.5467	-1.56907	0.0283019	-0.323593	1.21433	0.752951
MAB_0836c	3.75537	7.32244	0.607858	5.91167	5.9685	5.61627	6.26614	0.649869	4.65804	4.18237	-0.661793	0	-0.432698	1.04056	0.643847
MAB_0837c	1.78209	6.58876	0.965809	4.08802	3.95455	3.55204	4.66933	1.11729	4.6356	3.16776	0.290854	0	-0.192084	1.15789	0.88446
MAB_0838c	0	8.49147	1.48201	5.43689	5.31037	4.62056	6.29041	1.66985	4.61682	5.40615	-0.73283	0.0188679	0.421009	1.061	1.49755
MAB_0839c	0	4.89181	1.01154	2.5591	2.47597	1.97027	3.05046	1.0802	4.57717	3.04588	0.16278	0.0188679	-0.247669	1.25921	0.828875
MAB_0840c	0.585631	5.2445	1.02558	3.22762	3.42743	2.66645	3.93266	1.26621	4.60675	2.99733	-0.516428	0	-0.19296	1.21854	0.883585
MAB_0841	0	5.4873	1.22914	2.51251	2.3952	1.55161	3.41305	1.86144	4.53355	2.30754	0.194472	0.00943396	-0.0327846	1.26192	1.04376
MAB_0842	0	5.92186	1.43141	1.92324	1.47824	0.906239	2.83994	1.9337	4.3771	2.84455	0.766487	0.0660377	0.135657	1.29576	1.2122
MAB_0843	0	5.27606	0.921761	1.90712	1.68931	1.28938	2.42444	1.13506	4.54996	4.32764	0.975551	0.00943396	-0.374918	1.29668	0.701627
MAB_0844	0	6.57337	1.10755	3.88986	3.77259	3.34082	4.66686	1.32604	4.61762	3.94546	-0.255247	0.00943396	-0.0654004	1.17295	1.01114
MAB_0845	5.42771	9.67994	0.996189	7.24564	7.24982	6.31191	8.06874	1.75683	4.65405	1.95986	0.0766417	0	-0.0182368	1.01443	1.05831
MAB_0846	3.5887	8.50419	1.12212	6.14869	6.36567	5.07123	7.09526	2.02403	4.6465	2.07702	-0.237228	0	0.0890753	1.03305	1.16562
MAB_0847c	3.08691	8.64928	0.649608	5.99905	6.01033	5.69237	6.31751	0.625145	4.6575	8.73875	-0.115005	0	-0.387895	1.0375	0.688649
MAB_0848c	0	5.25553	1.07338	3.29652	3.27379	2.45198	4.20673	1.75474	4.60484	2.33732	-0.253512	0.00943396	-0.140719	1.2141	0.935826
MAB_0849c	0.696874	5.34197	1.00003	3.02	2.74179	2.43087	3.56483	1.13396	4.60954	2.61764	0.513195	0	-0.231572	1.2316	0.844973
MAB_0850	2.6184	7.04141	1.03153	4.85233	5.17547	4.17704	5.50484	1.32779	4.64009	2.33646	-0.331623	0	-0.0688848	1.10041	1.00766
MAB_0851	5.92991	11.2507	1.08992	9.24804	9.41378	8.66845	10.0883	1.41982	4.65636	2.72835	-0.547886	0	0.0411579	1.04876	1.1177
MAB_0852	3.87559	9.30266	1.49193	6.62042	6.55525	5.36268	7.73582	2.37314	4.63808	1.91193	0.106442	0	0.47067	1.02126	1.54721
MAB_0853	2.55657	9.02366	1.8422	6.21882	6.58059	4.63398	7.80839	3.17441	4.6177	1.78639	-0.219295	0	0.81091	1.03129	1.88745
MAB_0854	2.14309	8.42668	1.65121	5.77106	5.95244	4.25869	7.28277	3.02408	4.62066	2.06526	-0.216366	0	0.605193	1.04602	1.68174
MAB_0855	2.40103	9.05695	1.7073	6.12145	6.14449	4.7754	7.65393	2.87852	4.62256	2.09785	-0.291502	0	0.673523	1.03378	1.75007
MAB_0856c	2.78597	7.20409	1.00867	4.39194	4.10714	3.66479	4.66978	1.00499	4.63923	4.17325	1.33289	0	-0.125615	1.13428	0.950929
MAB_0857	3.10785	11.5358	2.01948	6.51296	6.1383	4.99901	7.35662	2.35761	4.61818	2.68302	0.821382	0	0.995619	1.02386	2.07216
MAB_0858	5.05644	10.1089	0.977267	7.15814	6.92845	6.43667	7.83104	1.39437	4.65435	2.98579	0.52916	0	-0.0368589	1.01413	1.03969
MAB_0859	2.7699	8.62791	0.977924	5.49594	5.37025	4.80032	6.077	1.27668	4.64805	4.15384	0.648067	0	-0.0800962	1.05802	0.996448
MAB_0860c	5.56163	8.87092	0.568745	7.13978	7.06537	6.72799	7.45785	0.729865	4.66034	4.16725	0.715262	0	-0.445351	1.0141	0.631193
MAB_0861	4.35021	9.39668	1.06185	6.91476	6.82925	6.068	7.66963	1.60163	4.65183	2.58944	0.31089	0	0.0465816	1.01527	1.12313
MAB_0862c	3.14439	7.85697	0.871209	5.97918	6.06247	5.29507	6.53746	1.24239	4.65264	2.82817	-0.309653	0	-0.166962	1.03817	0.909583
MAB_0863	1.76997	8.84224	0.98223	5.94742	6.05394	5.46952	6.45139	0.981874	4.64896	6.19765	-0.588942	0	-0.0570408	1.03927	1.0195
MAB_0864	3.96644	8.65684	0.777692	7.18772	7.36118	6.8647	7.69803	0.833328	4.65736	4.62477	-1.04962	0	-0.236509	1.0142	0.840036
MAB_0865	2.12067	9.48907	1.24737	5.87611	5.76834	5.07356	6.3398	1.26624	4.6409	3.74405	0.299127	0	0.205497	1.04188	1.28204
MAB_0866	1.98946	7.36193	0.919922	5.29671	5.43817	4.79	5.91514	1.12514	4.64752	3.64008	-0.712047	0	-0.149306	1.06923	0.927238
MAB_0867c	4.98793	8.18365	0.724868	6.63433	6.58073	6.10107	7.09649	0.995419	4.65754	2.43191	0.210908	0	-0.296065	1.02093	0.780479
MAB_0868c	4.55184	9.24844	0.946114	6.66529	6.68441	6.17935	7.15012	0.970765	4.6534	3.16037	0.104317	0	-0.0741034	1.02022	1.00244
MAB_0869c	7.75763	14.298	1.43763	12.0351	12.4279	11.566	12.9456	1.37957	4.65596	3.94366	-1.20016	0	0.270225	1.1674	1.34677
MAB_0870c	1.66082	5.43538	0.73774	3.31133	3.35258	2.82114	3.67119	0.850048	4.63894	3.54379	0.419284	0	-0.475392	1.21313	0.601153
MAB_0871c	6.64735	9.66365	0.706052	8.16835	8.14591	7.63628	8.70246	1.06617	4.65974	2.1996	0.148659	0	-0.31848	1.02453	0.758065
MAB_0872	4.50376	10.6004	1.29412	6.95788	6.75843	6.04264	7.32383	1.28119	4.64702	3.65181	0.960509	0	0.279347	1.01477	1.35589
MAB_0873	4.44257	12.4788	1.65113	6.97359	6.55574	6.03361	7.32604	1.29243	4.63842	6.07537	1.78395	0	0.636502	1.01463	1.71305
MAB_0874c	5.07045	10.5763	1.04578	6.94986	6.78507	6.25863	7.46347	1.20484	4.65276	5.23251	1.27855	0	0.0309264	1.01485	1.10747
MAB_0875c	4.2302	8.62029	1.02289	6.27319	6.10524	5.37324	6.89261	1.51936	4.65053	2.48732	0.548874	0	-0.00702785	1.02992	1.06952
MAB_0876	6.93626	10.371	0.732838	9.25143	9.41261	8.97519	9.80983	0.834648	4.66022	4.03184	-1.148	0	-0.316015	1.04885	0.76053
MAB_0877c	4.17184	13.0729	1.21609	8.81217	8.69555	8.1896	9.51279	1.32319	4.65392	5.5543	0.20449	0	0.177816	1.03828	1.25436
MAB_0878c	1.22086	7.8368	1.01656	4.30594	4.37749	3.66249	4.89776	1.23527	4.63528	4.46525	0.277031	0	-0.124399	1.14096	0.952146
MAB_0879	3.62928	12.5225	1.25437	5.30423	5.14715	4.65056	5.62145	0.970885	4.63994	16.7406	3.10775	0	0.18562	1.06875	1.26216
MAB_0880	4.074	9.76075	1.2443	5.95966	5.63535	5.1834	6.16889	0.985488	4.64365	4.9199	1.59963	0	0.205457	1.03884	1.282
MAB_0881	5.0845	9.70323	0.918214	6.86236	6.70771	6.38303	7.13994	0.756917	4.65491	4.56835	1.11811	0	-0.097877	1.01609	0.978667
MAB_0882	1.88456	5.87096	0.774499	4.13216	4.10835	3.70026	4.74044	1.04018	4.64526	3.24073	-0.354142	0	-0.379979	1.15448	0.696565
MAB_0883c	2.91904	9.86615	0.81074	8.23648	8.29492	7.93236	8.54907	0.616708	4.658	19.123	-2.51232	0	-0.215534	1.02627	0.86101
MAB_0884c	3.26984	10.0364	1.26015	6.0237	5.99378	5.31016	6.65207	1.34191	4.64231	4.48634	0.765036	0	0.223456	1.0367	1.3
MAB_0885c	4.27011	12.0727	1.82747	8.31672	8.63926	7.27608	9.20372	1.92764	4.63891	2.79295	-0.0198109	0	0.799138	1.02833	1.87568
MAB_0886c	0	4.24518	0.749468	2.27249	2.28928	1.99785	2.64402	0.646163	4.59766	4.5271	-0.392969	0.0188679	-0.526305	1.27577	0.550239
MAB_0887c	0	7.60899	0.88227	4.96572	4.97374	4.52552	5.42291	0.897399	4.64305	11.9859	-1.53599	0.00943396	-0.210031	1.0923	0.866513
MAB_0888c	0	8.76325	1.40786	4.91344	4.67133	4.12332	5.43156	1.30824	4.62055	4.67895	0.59937	0.00943396	0.311792	1.09607	1.38834
MAB_0889c	0	7.37336	1.39226	3.60296	3.55136	2.83969	4.19657	1.35688	4.58402	3.85479	0.42723	0.00943396	0.198712	1.19354	1.27526
MAB_0890c	2.3858	9.91669	1.43382	5.58812	5.21924	4.84138	5.99433	1.15295	4.63302	4.89927	1.28781	0	0.379963	1.05385	1.45651
MAB_0891c	3.05378	7.41288	0.742801	5.27796	5.26187	4.90806	5.62063	0.712576	4.6535	4.29134	0.0422767	0	-0.327629	1.07043	0.748916
MAB_0892c	0.0730112	5.48465	0.782156	3.25159	3.25003	2.84286	3.61935	0.776484	4.63046	5.5103	-0.441771	0	-0.434844	1.217	0.641701
MAB_0893	2.80305	10.2868	1.41274	6.22466	6.27128	5.14953	6.97161	1.82209	4.638	3.77234	0.444461	0	0.3816	1.03114	1.45814
MAB_0894c	1.15564	9.79096	2.18412	6.05353	6.19679	4.26877	8.12721	3.85844	4.59433	1.97354	-0.124679	0	1.14836	1.03576	2.22491
MAB_0895c	4.48726	12.5233	2.28665	8.27092	8.18968	6.37276	10.3423	3.96957	4.6254	1.86858	0.205432	0	1.25949	1.02716	2.33604
MAB_0896c	1.86647	10.8883	2.08742	6.53964	6.44325	4.82948	8.32356	3.49408	4.61225	2.07984	0.210776	0	1.06422	1.0232	2.14076
MAB_0897c	2.98325	10.6071	2.03919	6.12185	5.87476	4.45942	7.7351	3.27569	4.60943	2.15285	0.47451	0	1.00542	1.03377	2.08196
MAB_0898	2.0246	6.79242	1.0715	5.19306	5.48428	4.40232	6.02402	1.6217	4.64067	3.05168	-0.733004	0	-0.00458835	1.07609	1.07196
MAB_0899c	1.50133	9.04272	2.06695	5.22378	5.55866	3.19582	6.87475	3.67893	4.5799	1.77381	-0.15089	0	0.992945	1.074	2.06949
MAB_0900c	5.05654	11.6302	1.87041	8.67825	9.26993	7.24506	10.0971	2.85202	4.63945	1.82282	-0.369923	0	0.834603	1.03581	1.91115
MAB_0901c	3.63075	8.21434	0.666102	5.38064	5.31334	5.05475	5.64057	0.585818	4.65599	6.40761	0.812156	0	-0.398027	1.06413	0.678518
MAB_0902	0.729048	10.0209	2.01618	5.4194	5.80159	4.51413	6.57427	2.06014	4.58274	3.04857	-0.525648	0	0.954231	1.06195	2.03078
MAB_0903	0	10.0561	2.37678	5.66921	5.999	4.30297	7.2902	2.98722	4.54996	2.8408	-0.643038	0.0377358	1.32648	1.0503	2.40303
MAB_0904	0.93711	9.3643	2.17008	5.41234	5.92425	3.71211	6.85492	3.14281	4.57266	2.34727	-0.357416	0	1.10774	1.06234	2.18429
MAB_0905	0	9.46719	2.07848	5.537	6.03002	4.34571	6.71224	2.36653	4.58044	2.72339	-0.562886	0.00943396	1.02235	1.05614	2.09889
MAB_0906	0.998883	11.0137	2.2077	6.0743	6.3166	4.81437	7.31858	2.50421	4.59268	2.69618	-0.0700317	0	1.17257	1.03513	2.24911
MAB_0907	0	7.89958	1.72308	4.33979	4.57052	2.96562	5.52177	2.55615	4.57559	2.40712	-0.161568	0.00943396	0.584752	1.13832	1.6613
MAB_0908	0.952298	8.93525	1.86247	4.96506	5.34341	3.4842	6.28853	2.80433	4.58592	2.31556	-0.299537	0	0.770121	1.09235	1.84667
MAB_0909	0	8.04378	1.92978	4.27436	4.75331	2.75472	5.72573	2.97101	4.53804	2.23568	-0.484969	0.0283019	0.786364	1.14341	1.86291
MAB_0910	1.36075	8.67805	1.70025	5.52184	5.84534	5.189	6.44379	1.2548	4.60897	3.20995	-0.812649	0	0.643431	1.05682	1.71998
MAB_0911	1.10932	8.86608	1.60583	5.54907	5.87222	4.57306	6.433	1.85994	4.61796	2.88955	-0.4207	0	0.550234	1.0556	1.62678
MAB_0912	0	6.61091	1.33523	4.5529	4.71557	3.70829	5.55442	1.84613	4.61197	3.53315	-0.869034	0.00943396	0.213242	1.12199	1.28979
MAB_0913c	2.5286	7.49667	1.13404	4.94532	4.92466	4.07604	5.62998	1.55394	4.63722	2.65602	0.212348	0	0.0402663	1.09378	1.11681
MAB_0914c	0	4.57401	0.920248	2.52303	2.50383	1.95073	3.2643	1.31357	4.58596	2.86833	-0.265308	0.0188679	-0.341064	1.26131	0.73548
MAB_0915c	0.599533	5.02895	0.923124	2.72669	2.81712	2.05837	3.39421	1.33584	4.60323	2.58804	-0.0148947	0	-0.326225	1.24935	0.75032
MAB_0916c	0	5.55071	0.958046	3.12145	3.08298	2.62632	3.78736	1.16105	4.60893	3.51059	-0.511289	0.00943396	-0.267231	1.22528	0.809313
MAB_0917c	2.80464	7.5673	1.00454	5.12349	4.96757	4.31958	5.95808	1.6385	4.64431	2.316	0.15536	0	-0.076407	1.08095	1.00014
MAB_0918c	0.891681	6.70788	1.45689	3.387	3.23986	2.17063	4.65347	2.48284	4.56955	2.02654	0.268036	0	0.248728	1.20817	1.32527
MAB_0919	2.57572	9.97731	1.36719	4.51549	4.35944	3.55336	5.09294	1.53958	4.62172	6.30944	1.4377	0	0.242378	1.12481	1.31892
MAB_0920	2.94696	7.43816	0.926642	4.95342	4.93035	4.25332	5.54477	1.29145	4.64621	2.57721	0.328279	0	-0.166549	1.09319	0.909995
MAB_0923c	2.24404	7.8762	0.956113	4.19866	4.10208	3.48191	4.64081	1.15891	4.6392	5.64779	1.22328	0	-0.193197	1.14931	0.883347
MAB_0924c	1.24059	8.8894	1.497	4.75544	4.80522	4.06811	5.22532	1.15721	4.61228	3.39722	0.179078	0	0.389831	1.10717	1.46638
MAB_0925c	0	8.69418	1.78752	3.8467	3.68359	2.65765	4.55425	1.8966	4.55493	3.38627	0.711541	0.00943396	0.611382	1.17614	1.68793
MAB_0926	0	10.7684	1.73157	3.04096	2.8511	1.73353	4.16939	2.43585	4.49726	5.50251	1.0042	0.0377358	0.501266	1.2303	1.57781
MAB_0927	0	8.48733	2.15459	4.32574	4.69757	2.53562	6.21006	3.67444	4.52014	1.70193	-0.207946	0.0188679	1.01518	1.13942	2.09172
MAB_0928c	5.90256	10.7561	1.00596	8.85238	8.98907	8.52942	9.43457	0.905152	4.65666	4.91256	-1.26663	0	-0.0331321	1.03909	1.04341
MAB_0929	5.40501	12.1723	1.84911	8.59112	8.2304	7.36166	9.70264	2.34098	4.64074	2.30963	0.389465	0	0.814728	1.03438	1.89127
MAB_0930	6.7686	12.9786	1.47922	9.67332	9.45589	8.69888	10.4221	1.72322	4.65193	2.40353	0.308501	0	0.417071	1.06215	1.49362
MAB_0931c	4.94593	9.94038	1.13407	7.91109	8.03609	7.24618	8.67184	1.42566	4.65299	2.72585	-0.336909	0	0.115337	1.01873	1.19188
MAB_0932c	4.65937	10.3829	1.17436	7.57623	7.68596	6.65668	8.2586	1.60192	4.65162	2.82888	0.349368	0	0.158402	1.01595	1.23495
MAB_0933	4.67131	8.96437	0.603047	6.04167	6.1246	5.70295	6.32255	0.619597	4.65868	10.0842	1.48022	0	-0.433081	1.03613	0.643463
MAB_0934	2.01499	5.13452	0.710243	4.08241	4.20882	3.61797	4.64766	1.02969	4.64765	2.7449	-0.619644	0	-0.448083	1.15833	0.628461
MAB_0935c	7.35736	11.6924	1.02286	10.1358	10.5079	9.67408	10.9515	1.27747	4.6582	2.99427	-0.98039	0	-0.0567441	1.0796	1.0198
MAB_0936c	6.8415	9.85774	0.712064	8.6397	8.78201	8.28478	9.18401	0.899233	4.65999	2.88494	-0.778055	0	-0.323104	1.03517	0.753441
MAB_0937c	6.44469	10.4578	0.987834	9.0666	9.41078	8.31126	9.71977	1.40851	4.65735	2.68613	-0.800506	0	-0.0561261	1.04396	1.02042
MAB_0938c	6.07186	11.337	1.37673	8.77453	8.71911	7.59475	9.56885	1.9741	4.65123	2.1918	0.14046	0	0.339186	1.03754	1.41573
MAB_0939	7.58685	11.9687	1.02323	10.1136	10.5572	9.53973	10.85	1.31032	4.65818	2.99981	-0.947637	0	-0.0554745	1.0787	1.02107
MAB_0940	4.92587	9.51619	0.9375	7.54756	7.53279	6.9946	8.30999	1.3154	4.65563	2.62936	-0.347419	0	-0.0784063	1.01591	0.998138
MAB_0941	5.49073	8.60209	0.634301	6.97488	7.03026	6.71905	7.37611	0.657059	4.65926	3.19856	-0.499216	0	-0.380318	1.01462	0.696226
MAB_0942	3.84924	6.95696	0.677764	5.54179	5.49531	5.09199	5.9664	0.874405	4.65594	2.84584	-0.104929	0	-0.378158	1.05592	0.698386
MAB_0943	3.83723	6.83769	0.62564	5.43113	5.35756	5.02969	5.96034	0.930653	4.65685	2.42282	0.069759	0	-0.435671	1.06131	0.640873
MAB_0944	6.08385	11.0248	0.958043	9.33721	9.47359	8.94888	9.87801	0.929134	4.65805	3.63932	-0.752204	0	-0.0932831	1.05133	0.983261
MAB_0945	1.98412	11.2896	1.26461	6.44525	6.33969	5.83523	6.89328	1.05805	4.64407	5.98766	0.406854	0	0.239055	1.02555	1.3156
MAB_0946	0.781362	7.80732	0.921915	4.16437	4.09396	3.69375	4.6492	0.955455	4.63752	6.69957	0.0104069	0	-0.230062	1.15198	0.846482
MAB_0947c	3.74277	10.3158	1.08572	5.84702	5.62552	5.12859	6.36623	1.23764	4.64725	5.76854	1.25778	0	0.042727	1.04299	1.11927
MAB_0948c	6.54317	10.2785	0.699621	8.60058	8.591	8.3012	8.94057	0.639372	4.66014	3.28234	-0.0982262	0	-0.334919	1.03454	0.741625
MAB_0949c	3.93673	7.88004	0.844067	5.91534	5.82706	5.52668	6.37885	0.852166	4.6532	3.01523	-0.0970399	0	-0.196355	1.04042	0.88019
MAB_0950c	2.94298	8.87921	0.998136	5.57558	5.54116	4.93839	6.23783	1.29944	4.64745	3.67112	0.193972	0	-0.0562751	1.05441	1.02027
MAB_0951	2.86039	6.92352	0.815584	4.75977	4.8124	4.22194	5.24457	1.02263	4.6487	3.08732	0.0346808	0	-0.291282	1.10687	0.785263
MAB_0952	1.76605	5.19811	0.673467	3.24115	3.32117	2.96804	3.63737	0.669325	4.64151	3.12562	-0.0361082	0	-0.544205	1.21767	0.53234
MAB_0953	3.18967	7.57673	0.68921	5.02915	4.95303	4.68648	5.30423	0.617754	4.65424	4.86776	0.553715	0	-0.398501	1.08771	0.678043
MAB_0954	4.77743	9.75235	1.10421	7.48495	7.35437	6.8035	8.35142	1.54792	4.6526	2.5344	0.0858645	0	0.0885071	1.0157	1.16505
MAB_0955c	4.59094	8.83883	0.71002	8.03914	8.20202	7.8252	8.50263	0.677437	4.6593	8.18564	-1.96334	0	-0.311368	1.02139	0.765176
MAB_0956c	4.51405	9.73433	0.737301	7.12387	7.15678	6.7817	7.46055	0.678845	4.65806	5.4342	-0.114924	0	-0.276781	1.01408	0.799763
MAB_0957	4.50304	8.81319	0.947722	6.67002	6.72973	6.12558	7.23641	1.11084	4.65328	2.81239	-0.129899	0	-0.0723877	1.02011	1.00416
MAB_0958c	2.54593	7.3918	0.905386	4.32267	4.26351	3.83782	4.60742	0.769599	4.64305	5.6956	1.35883	0	-0.234269	1.13966	0.842275
MAB_0959	6.33313	9.0221	0.549373	8.06347	8.16745	7.72263	8.49108	0.768454	4.6611	3.0534	-0.686945	0	-0.472581	1.02195	0.603964
MAB_0960	5.67869	8.86292	0.531363	7.69964	7.75037	7.37269	8.04707	0.674383	4.66103	4.56954	-0.709839	0	-0.484769	1.01613	0.591776
MAB_0961c	4.4286	10.5418	1.14092	7.1219	7.14423	6.30485	7.74749	1.44264	4.65086	3.79447	0.478542	0	0.126839	1.01408	1.20338
MAB_0962	4.87843	10.0177	0.778868	7.73437	7.79051	7.12603	8.38598	1.25995	4.65832	4.01226	-0.378252	0	-0.237495	1.01636	0.83905
MAB_0963c	4.27011	8.3561	0.684986	6.15295	6.17653	5.78391	6.57751	0.793602	4.65725	3.892	-0.00755592	0	-0.347951	1.03294	0.728593
MAB_0964	2.55682	9.67047	1.20116	5.37754	5.40219	4.50692	6.07397	1.56705	4.63901	4.09213	0.558828	0	0.136852	1.06431	1.2134
MAB_0965	4.28241	9.00044	0.875704	6.97668	7.05929	6.3411	7.69832	1.35722	4.65552	2.77051	-0.152013	0	-0.138901	1.0146	0.937644
MAB_0966	1.98107	6.60269	0.869064	4.63804	4.62045	4.10353	5.26554	1.16201	4.64537	3.03327	-0.285231	0	-0.246583	1.11565	0.829962
MAB_0967	3.67951	12.6041	1.34961	6.44387	6.25898	5.70874	7.01139	1.30265	4.64287	7.58624	1.35253	0	0.324028	1.02559	1.40057
MAB_0968c	1.72013	9.7367	1.61585	5.98048	5.95604	4.94595	6.98971	2.04376	4.62503	3.24848	-0.124839	0	0.577719	1.03813	1.65426
MAB_0969	2.77374	8.90928	0.895182	4.56344	4.28035	4.04052	4.92459	0.884077	4.64616	10.1852	2.11869	0	-0.226012	1.12119	0.850533
MAB_0970c	6.00898	10.5161	0.648122	9.53735	9.65089	9.24922	9.95488	0.705663	4.66103	9.8814	-1.84618	0	-0.409443	1.05756	0.667102
MAB_0971	0	5.19969	0.770617	3.23915	3.31936	2.82166	3.69199	0.870328	4.62982	5.21169	-0.806362	0.00943396	-0.447183	1.2178	0.629362
MAB_0972	5.18148	9.40223	0.990019	7.90844	8.08098	7.33285	8.69918	1.36633	4.65534	3.09363	-0.818575	0	-0.0286652	1.01868	1.04788
MAB_0973	2.75537	7.40557	1.11376	5.66821	5.94587	5.07934	6.46391	1.38457	4.64304	2.63799	-0.698857	0	0.0634086	1.05035	1.13995
MAB_0974	6.48236	11.9318	1.06256	8.93004	8.89471	8.36388	9.37993	1.01605	4.65645	3.46599	0.266846	0	0.0218041	1.04075	1.09835
MAB_0975c	3.04849	8.20473	0.94056	5.83968	5.86677	5.26815	6.31708	1.04893	4.6502	3.7464	-0.227711	0	-0.102717	1.04328	0.973827
MAB_0976	1.65769	6.58256	0.988219	4.54583	4.65845	3.80846	5.30406	1.49559	4.63825	3.0519	-0.601887	0	-0.1343	1.12252	0.942244
MAB_0977c	2.77596	7.52975	0.961487	5.17786	4.98054	4.57591	5.64513	1.06922	4.64652	3.06528	0.437151	0	-0.115652	1.07714	0.960893
MAB_0978	4.1097	13.619	1.45985	7.35691	7.07372	6.49415	7.81844	1.32429	4.64543	8.04264	1.75726	0	0.444825	1.01503	1.52137
MAB_0979	3.5688	9.69798	0.906155	5.86279	5.78794	5.34628	6.11407	0.767795	4.65205	6.40968	1.14455	0	-0.13623	1.04238	0.940315
MAB_0980	2.30858	7.09372	0.950393	4.62355	4.63838	3.94703	5.2474	1.30037	4.64235	3.10784	0.205467	0	-0.166322	1.11672	0.910222
MAB_0981c	3.08691	8.25388	0.82601	6.1655	6.16992	5.6973	6.74852	1.05122	4.65421	4.15094	-0.516921	0	-0.206606	1.03262	0.869938
MAB_0982c	1.52316	9.31851	0.871748	5.80826	5.82712	5.40895	6.29885	0.889893	4.65147	10.1773	-0.367324	0	-0.172767	1.04452	0.903777
MAB_0983c	3.04488	8.36306	0.719209	6.03739	6.12607	5.55715	6.45723	0.900083	4.65624	6.31791	-0.183333	0	-0.317053	1.03626	0.759491
MAB_0984c	5.03258	10.648	0.967263	7.28932	7.32964	6.84433	7.72315	0.878818	4.65473	3.90185	0.274296	0	-0.0473821	1.01465	1.02916
MAB_0985	8.53658	15.4519	1.3545	10.3117	9.88947	9.5147	10.7836	1.26894	4.65529	5.13346	1.354	0	0.267617	1.08688	1.34416
MAB_0986	3.44148	8.68871	0.808054	5.14767	5.13447	4.59747	5.61306	1.01559	4.65155	5.49512	0.840882	0	-0.271189	1.07924	0.805356
MAB_0987c	2.31384	8.00071	1.38718	5.23914	5.31399	3.98376	6.32361	2.33986	4.62804	2.0839	0.0678586	0	0.314203	1.07298	1.39075
MAB_0988c	0.669028	6.55123	1.50797	3.39088	3.57937	2.01592	4.60728	2.59135	4.56023	1.93626	0.112954	0	0.300063	1.20791	1.37661
MAB_0989	1.43676	6.3393	0.827637	3.63492	3.49994	3.06825	4.11347	1.04522	4.63817	3.77235	0.603344	0	-0.363683	1.19132	0.712862
MAB_0990c	3.06724	7.81493	1.07584	6.07828	6.27548	5.3498	6.99415	1.64434	4.64723	2.42713	-0.505929	0	0.0408266	1.03501	1.11737
MAB_0992	2.41009	6.77849	0.760233	4.98724	5.03752	4.64346	5.4641	0.820638	4.65129	4.12184	-0.708062	0	-0.330511	1.09074	0.746033
MAB_0993c	3.10973	7.8164	0.747789	4.83575	4.79005	4.38959	5.14391	0.754318	4.65209	5.86258	1.19286	0	-0.353784	1.10157	0.72276
MAB_0994	1.72673	6.09163	0.922352	3.91242	3.97445	3.24771	4.41705	1.16935	4.63482	2.75135	-0.134335	0	-0.248914	1.17127	0.82763
MAB_0995	1.31357	7.44016	0.901584	3.20889	3.27057	2.61207	3.63055	1.01848	4.62653	8.28487	1.37763	0	-0.318154	1.21974	0.758391
MAB_0997c	0	5.93522	1.49688	3.61848	3.50515	2.28036	5.10926	2.8289	4.57157	1.60802	-0.0538538	0.00943396	0.304412	1.19247	1.38096
MAB_0998	1.89065	6.7584	0.855056	4.45392	4.53886	4.06138	4.86074	0.799369	4.64404	4.13949	-0.488313	0	-0.274455	1.12951	0.80209
MAB_0999	2.45446	7.20475	0.963142	4.74454	4.71101	4.26701	5.37027	1.10326	4.64256	3.02077	-0.0172327	0	-0.144802	1.10794	0.931743
MAB_1000	1.06526	5.39671	0.885871	3.0225	2.98745	2.39763	3.66237	1.26474	4.62037	2.7526	0.284525	0	-0.345575	1.23145	0.730969
MAB_1001	1.66081	7.57528	0.916743	5.07821	5.205	4.38593	5.56173	1.1758	4.64655	4.24022	-0.276289	0	-0.167433	1.08418	0.909112
MAB_1002	6.03735	12.4905	0.988717	8.3643	8.21679	7.82073	8.64771	0.826983	4.6569	8.96078	1.82248	0	-0.0407988	1.02952	1.03575
MAB_1003c	4.78901	11.9906	1.15547	10.3836	10.5172	9.90645	11.2699	1.36341	4.65685	6.89564	-1.45721	0	0.0655346	1.08994	1.14208
MAB_1004c	4.50251	11.2804	1.12222	8.56906	8.33531	7.81757	9.56247	1.74489	4.65478	3.50226	-0.168459	0	0.0882273	1.03399	1.16477
MAB_1005c	3.65116	12.3047	1.83552	8.5092	8.98607	7.06303	9.86205	2.79903	4.63931	2.24426	-0.369131	0	0.802688	1.03283	1.87923
MAB_1006c	1.24553	11.3109	1.78965	8.09916	8.31324	6.69658	9.51467	2.81809	4.6369	3.44458	-0.639253	0	0.766843	1.02281	1.84339
MAB_1007c	3.67647	12.9423	1.74972	9.68595	10.0122	8.31538	10.9593	2.64393	4.64646	3.05077	-0.47991	0	0.68713	1.06259	1.76367
MAB_1008c	3.09865	12.2846	1.89314	9.01563	9.54918	7.82671	10.277	2.45028	4.64	2.95733	-0.632578	0	0.850422	1.04272	1.92697
MAB_1009c	2.18676	10.8099	1.87941	7.84558	8.40417	6.77914	9.22312	2.44398	4.63166	3.41436	-0.862588	0	0.861763	1.01765	1.93831
MAB_1010c	2.82744	11.1588	1.78937	8.00918	8.5656	6.30867	9.48666	3.178	4.63724	2.21616	-0.48106	0	0.768654	1.02071	1.8452
MAB_1011c	2.33208	9.89562	1.50637	6.5772	6.90316	5.40224	7.75405	2.35181	4.63592	2.47036	-0.428752	0	0.48408	1.02229	1.56062
MAB_1012c	2.43116	9.79767	1.68168	6.94028	7.42027	5.46396	8.31746	2.8535	4.63232	2.19671	-0.52654	0	0.666724	1.01496	1.74327
MAB_1013	5.07019	11.3785	1.29488	8.50656	8.40371	7.40483	9.49424	2.08941	4.65202	2.48069	0.278401	0	0.262104	1.03277	1.33865
MAB_1014c	1.56311	5.56241	0.876937	3.77254	3.70784	3.1402	4.39015	1.24995	4.6362	2.474	0.0834757	0	-0.304609	1.18155	0.771936
MAB_1015c	0	5.88042	0.981088	3.29536	3.23576	2.72217	3.77794	1.05577	4.61526	3.71087	0.0975655	0.00943396	-0.233083	1.21417	0.843462
MAB_1016c	1.23444	5.40431	0.89832	3.13402	3.09817	2.45745	3.67569	1.21824	4.62252	2.7317	0.32655	0	-0.326166	1.22449	0.750378
MAB_1017c	0	6.00785	1.13168	3.5207	3.42811	2.90892	4.14993	1.24101	4.59909	4.27238	-0.449076	0.0283019	-0.0675181	1.1992	1.00903
MAB_1018c	0	5.70615	1.02045	3.22132	3.17785	2.65892	3.75048	1.09156	4.60721	4.0764	-0.00413041	0.00943396	-0.198488	1.21894	0.878056
MAB_1019c	0	7.02657	1.34181	4.41304	4.3897	3.58469	5.21809	1.6334	4.60831	3.86469	-0.415732	0.0188679	0.20916	1.13265	1.2857
MAB_1020	2.97419	8.57081	1.23857	5.39863	5.26058	4.4828	6.4596	1.97681	4.63749	2.5027	0.332025	0	0.175465	1.0631	1.25201
MAB_1021	0.661997	6.46382	1.1848	4.02822	4.2644	3.20577	4.88672	1.68096	4.61614	2.73044	-0.453444	0	0.0223047	1.16249	1.09885
MAB_1022	1.73009	6.33598	0.971594	3.97317	3.89483	3.23407	4.54078	1.30671	4.6339	2.75902	0.361607	0	-0.195095	1.16669	0.88145
MAB_1023c	4.11669	9.51737	1.42128	6.80885	6.8378	5.65095	7.91669	2.26574	4.64143	1.95533	-0.0719398	0	0.404152	1.01713	1.4807
MAB_1024	4.58927	10.5832	0.952726	6.36913	6.24909	5.60827	6.86522	1.25695	4.65289	6.87349	1.36658	0	-0.0747536	1.02748	1.00179
MAB_1025	5.08368	9.08307	0.951603	7.05555	6.90456	6.3695	7.71644	1.34694	4.65445	2.43126	0.20429	0	-0.0625607	1.01416	1.01398
MAB_1026c	4.92602	12.5673	1.51676	8.8704	9.06556	8.24917	9.82576	1.57659	4.64838	3.04666	-0.414219	0	0.477297	1.03946	1.55384
MAB_1027	5.78723	8.3416	0.376361	7.16131	7.15052	6.96174	7.37367	0.411929	4.66207	4.77938	0.0221505	0	-0.637771	1.01413	0.438773
MAB_1028c	3.14798	9.19868	1.16695	5.33082	5.05879	4.61132	5.70254	1.09121	4.64127	5.13767	1.34098	0	0.0998563	1.0671	1.1764
MAB_1029c	2.17192	9.65757	1.68574	5.59757	5.62485	4.33475	6.28614	1.95139	4.61893	3.20993	0.53609	0	0.632302	1.05344	1.70885
MAB_1030	4.01108	13.5543	2.02563	8.96844	8.34262	7.73278	10.2085	2.47574	4.63824	3.04268	0.391702	0	0.984009	1.04162	2.06055
MAB_1031c	4.42522	12.5556	2.14813	7.78411	7.2802	6.10176	9.43208	3.33032	4.62715	2.35044	0.689203	0	1.13129	1.01684	2.20784
MAB_1032c	4.85281	10.5703	1.0554	7.83464	8.02965	7.32092	8.50096	1.18004	4.65414	3.4865	-0.521665	0	0.0379089	1.01749	1.11445
MAB_1033	5.16875	10.2129	0.701055	6.4459	6.42558	5.99655	6.79312	0.796573	4.65779	9.36547	1.39939	0	-0.32448	1.02553	0.752065
MAB_1034c	1.86073	6.90942	0.737354	4.96016	4.93599	4.70026	5.40014	0.699889	4.6515	6.8223	-1.11494	0	-0.355349	1.0927	0.721195
MAB_1035c	2.84987	7.90151	0.940756	5.48789	5.49146	4.7088	6.12639	1.41758	4.64861	2.86001	-0.065355	0	-0.117652	1.05841	0.958893
MAB_1036	3.86141	8.236	0.792761	6.38991	6.4033	5.81476	6.90505	1.09028	4.65576	3.33743	0.0425032	0	-0.23419	1.02695	0.842354
MAB_1037	5.65742	9.60629	0.697838	7.93758	7.97585	7.59641	8.28201	0.6856	4.6595	4.97037	-0.729443	0	-0.321392	1.01923	0.755152
MAB_1038	6.04629	8.68127	0.534482	7.77697	7.91578	7.59396	8.07734	0.483383	4.66103	4.23757	-1.11607	0	-0.48228	1.01676	0.594264
MAB_1039	7.67842	11.7088	0.625669	9.32662	9.37682	9.00579	9.60736	0.601579	4.66124	6.02996	0.726916	0	-0.425345	1.05101	0.651199
MAB_1040	8.4252	13.3635	1.0852	10.1888	9.96227	9.41204	10.8311	1.41907	4.65796	3.40085	0.84372	0	0.00344537	1.08176	1.07999
MAB_1041	6.15014	12.0683	1.62565	8.23727	7.70751	7.11522	8.97864	1.86342	4.64505	2.89222	0.953228	0	0.599359	1.0263	1.6759
MAB_1042c	1.17786	12.5881	3.08661	6.28448	4.95798	4.2072	9.11777	4.91058	4.54843	2.18562	0.691967	0	2.05698	1.02963	3.13352
MAB_1043c	2.26936	8.66781	1.39371	5.24828	5.09165	4.35322	6.03841	1.68519	4.62842	2.52104	0.30047	0	0.321337	1.07237	1.39788
MAB_1044c	0	9.46359	1.95326	5.1392	5.20656	3.96384	6.42431	2.46047	4.58045	2.86486	-0.262787	0.00943396	0.873418	1.07984	1.94996
MAB_1045	1.39895	7.00445	0.886633	3.56799	3.47712	2.98663	4.01033	1.0237	4.63395	5.25016	0.94662	0	-0.309326	1.19596	0.767218
MAB_1046c	0.783467	8.60434	2.07928	3.38812	2.5952	2.03965	3.88214	1.84249	4.4991	3.50553	1.26062	0	0.871193	1.20809	1.94774
MAB_1047c	1.19134	6.68308	0.925274	3.57481	3.47553	3.01989	4.04779	1.0279	4.62971	3.43217	0.25646	0	-0.270216	1.19549	0.806328
MAB_1048c	1.24768	7.0929	1.31336	4.34346	4.265	3.22161	5.44902	2.22741	4.61698	1.96217	0.0766825	0	0.175324	1.13804	1.25187
MAB_1049	2.90495	7.53029	0.605604	5.38856	5.33625	5.03173	5.68958	0.657844	4.65716	6.29576	0.285835	0	-0.458069	1.06367	0.618476
MAB_1050c	2.13921	6.06011	0.717423	4.03643	3.95043	3.63579	4.51962	0.883823	4.64739	3.83857	-0.0596176	0	-0.44444	1.16186	0.632105
MAB_1051c	5.40157	9.79703	0.84179	8.17152	8.34664	7.81118	8.75498	0.943799	4.65798	3.73186	-0.919559	0	-0.182822	1.02461	0.893723
MAB_1052c	2.8844	9.77092	1.20058	7.67631	7.75606	7.02487	8.53494	1.51007	4.65057	4.16243	-0.73513	0	0.184555	1.01603	1.2611
MAB_1053c	0.96197	9.23044	1.24989	6.92489	6.99717	6.37204	7.63307	1.26102	4.64504	6.69025	-1.11091	0	0.234746	1.01514	1.31129
MAB_1054	6.23764	12.0826	0.896155	9.26874	9.50989	8.90332	9.76421	0.860882	4.65869	4.76671	-0.567351	0	-0.153187	1.04934	0.923358
MAB_1055c	4.25994	11.5365	1.28189	8.93669	9.2001	8.38575	9.82951	1.44376	4.65253	4.26735	-1.08997	0	0.240994	1.0409	1.31754
MAB_1056	5.82565	11.665	1.01534	9.99634	10.1487	9.52027	10.7351	1.21483	4.65807	4.99989	-1.16699	0	-0.0587218	1.07406	1.01782
MAB_1057	6.16694	11.7472	1.03863	10.4249	10.7269	9.94998	11.2267	1.27671	4.65826	5.03931	-1.30645	0	-0.0530923	1.09172	1.02345
MAB_1058	2.62434	6.41525	0.684041	4.77426	4.73083	4.42329	5.22518	0.801889	4.65296	4.13197	-0.300528	0	-0.421806	1.10585	0.654738
MAB_1059c	1.01508	4.71564	0.640904	2.65714	2.74381	2.26568	3.03786	0.772184	4.63329	3.62697	-0.0970256	0	-0.612557	1.25346	0.463987
MAB_1060	0.164354	6.49727	1.17828	3.23633	3.03578	2.54872	4.11332	1.5646	4.5951	2.80466	0.296133	0	-0.0397048	1.21798	1.03684
MAB_1061	5.64017	11.6784	0.9443	10.1576	10.212	9.65676	10.7911	1.13435	4.65893	6.9312	-1.30649	0	-0.136186	1.08049	0.940359
MAB_1062	7.13087	12.7076	1.05111	9.57254	9.81813	8.9455	10.2959	1.35037	4.65737	3.10316	-0.279271	0	-0.00761348	1.05873	1.06893
MAB_1063	0	7.61692	1.03601	5.85564	6.01532	5.57336	6.47834	0.90498	4.64266	11.4853	-2.16753	0.00943396	-0.00664946	1.04266	1.0699
MAB_1064	4.59257	10.69	1.09343	9.12077	9.53086	8.27434	9.93751	1.66316	4.6559	4.3639	-1.13732	0	0.0480946	1.04533	1.12464
MAB_1065	5.43073	8.84792	0.867787	7.54958	7.68862	7.13596	8.24028	1.10432	4.65667	2.81563	-0.737888	0	-0.148124	1.01591	0.928421
MAB_1066	2.16714	7.41486	1.24439	4.43448	4.01635	3.48224	5.47899	1.99675	4.62543	2.1577	0.545213	0	0.113388	1.131	1.18993
MAB_1067	1.68588	11.9256	2.72999	5.89528	5.31301	3.54174	7.90814	4.3664	4.55898	2.09522	0.521392	0	1.68883	1.04116	2.76538
MAB_1068c	5.87751	10.6206	1.07329	7.84671	7.96145	6.86521	8.46181	1.5966	4.65425	2.42362	0.336066	0	0.0556304	1.01766	1.13217
MAB_1069c	3.71079	7.13965	0.682433	5.71223	5.76721	5.28801	6.1329	0.84489	4.65621	2.86418	-0.390577	0	-0.366033	1.04847	0.710511
MAB_1070c	1.91816	7.89931	0.982863	6.22551	6.27134	5.78451	6.92886	1.14435	4.65001	5.30227	-1.01584	0	-0.0482578	1.03112	1.02829
MAB_1071c	4.47156	8.39157	0.86581	6.99431	7.07044	6.53063	7.53257	1.00194	4.65553	3.69662	-0.766519	0	-0.148659	1.01447	0.927885
MAB_1072c	3.2194	7.53542	0.870956	5.74159	5.66276	5.09264	6.31257	1.21993	4.65197	2.553	0.0817922	0	-0.176278	1.04723	0.900266
MAB_1073c	3.54324	6.67511	0.787804	5.0168	4.96517	4.5499	5.45597	0.906077	4.65118	2.46495	0.122579	0	-0.300802	1.08861	0.775743
MAB_1074c	3.77446	6.44437	0.659205	4.97053	4.79627	4.51487	5.44455	0.929686	4.65486	2.38703	0.491297	0	-0.432749	1.09195	0.643795
MAB_1075	2.76455	12.0597	1.54903	7.85546	7.84924	7.22618	8.67011	1.44393	4.64379	4.62304	0.191606	0	0.531239	1.0178	1.60778
MAB_1076	3.71874	12.5671	1.35058	8.03978	7.87877	7.41437	8.46046	1.04609	4.65012	7.60749	1.40787	0	0.329177	1.0214	1.40572
MAB_1077	6.26501	10.5698	0.857538	7.81887	7.6864	7.25814	8.29331	1.03517	4.65766	4.3741	1.01073	0	-0.159731	1.01727	0.916814
MAB_1078	8.02273	11.2687	0.535839	9.9009	9.96504	9.65134	10.1654	0.514114	4.66197	4.50567	-0.578278	0	-0.534567	1.07041	0.541978
MAB_1079	5.65182	10.101	0.587918	7.9509	7.98039	7.64822	8.23541	0.587187	4.66072	6.3134	0.0406211	0	-0.431573	1.01949	0.644971
MAB_1080	4.7048	9.46597	0.922656	7.82432	7.77184	7.2647	8.31518	1.05049	4.65645	3.19088	-0.155666	0	-0.0946861	1.01734	0.981858
MAB_1081	0.470989	9.47679	1.14534	7.53168	7.56512	7.03661	8.31119	1.27458	4.64883	15.1397	-2.30495	0	0.129475	1.01587	1.20602
MAB_1082c	4.94944	9.2371	0.925796	7.16035	7.00957	6.59207	7.85174	1.25968	4.65519	2.45904	0.252518	0	-0.0883347	1.01413	0.98821
MAB_1083c	2.71488	10.0656	1.58295	5.36262	4.91184	4.04451	6.87902	2.8345	4.62207	2.63553	0.735037	0	0.517763	1.06518	1.59431
MAB_1084c	5.31956	11.8449	1.59393	7.92515	7.37108	6.8284	8.51795	1.68955	4.64433	3.03865	0.950772	0	0.574935	1.01899	1.65148
MAB_1085c	1.97026	7.12513	0.748022	5.23895	5.36109	4.89192	5.67577	0.783852	4.65263	5.9304	-0.898221	0	-0.324967	1.07299	0.751577
MAB_1086	4.16241	9.04547	0.94587	7.02987	7.03248	6.50896	7.59057	1.08162	4.65426	3.37796	-0.283043	0	-0.0683925	1.01426	1.00815
MAB_1087	5.74798	11.9942	1.2273	9.00448	9.14174	8.43352	9.73884	1.30532	4.65395	3.24973	-0.44189	0	0.18484	1.04246	1.26138
MAB_1088	1.16406	7.78134	1.19069	4.49654	4.6686	3.78141	5.2827	1.50129	4.62549	3.60264	-0.430629	0	0.0644333	1.12625	1.14098
MAB_1089	8.04075	13.1973	0.87955	11.3294	11.24	10.9095	11.9278	1.01831	4.66041	3.9435	-0.431805	0	-0.25391	1.13346	0.822635
MAB_1091	0	8.10577	1.53824	3.9218	3.81343	2.97837	4.50884	1.53047	4.58193	4.11151	0.585348	0.0188679	0.367674	1.17056	1.44422
MAB_1092	4.63049	8.35057	0.855948	6.01725	5.83215	5.35137	6.51849	1.16713	4.65374	3.3086	0.891066	0	-0.180958	1.03691	0.895587
MAB_1093c	3.93884	9.70564	1.08116	7.17779	7.08039	6.58018	7.67347	1.09329	4.65208	3.27576	0.0447668	0	0.0669848	1.01417	1.14353
MAB_1094	6.12399	10.0845	0.902372	7.83054	7.93718	7.19763	8.53373	1.33611	4.65677	2.43987	-0.203756	0	-0.115057	1.01743	0.961488
MAB_1095	6.6492	11.1584	1.05355	9.19625	9.16284	8.68538	9.95127	1.26588	4.65685	2.54062	-0.190085	0	0.00622023	1.04733	1.08276
MAB_1096	6.29432	11.4534	1.12425	9.25541	9.19491	8.69293	10.0613	1.36835	4.65597	3.12491	-0.348347	0	0.0752891	1.04896	1.15183
MAB_1097	3.60766	8.57204	1.14581	6.80262	7.17511	6.17154	7.68688	1.51534	4.64833	3.49609	-0.969527	0	0.128561	1.01725	1.20511
MAB_1098	6.86869	11.5426	0.732641	9.22273	9.23465	8.79123	9.67833	0.887101	4.66029	3.98163	-0.112583	0	-0.315412	1.04805	0.761133
MAB_1099c	6.30156	12.0194	0.879698	8.92637	8.88222	8.52662	9.26997	0.743348	4.65865	5.90321	0.432444	0	-0.160973	1.04067	0.915572
MAB_1100c	3.84027	9.08991	0.674097	6.53588	6.53603	6.20162	6.87945	0.677823	4.65811	6.94396	0.0510505	0	-0.349197	1.02329	0.727348
MAB_1101	6.61582	12.1455	1.12407	8.04681	7.7812	7.33027	8.2534	0.923133	4.65438	6.18195	1.70753	0	0.102503	1.02156	1.17905
MAB_1102	6.3559	12.0452	1.10671	8.4383	8.31141	7.72323	8.89872	1.17549	4.65521	4.55587	1.03801	0	0.0754318	1.03128	1.15198
MAB_1103	3.7461	9.19199	0.917442	5.83374	5.6325	5.29691	6.17414	0.877227	4.65176	5.70662	1.25829	0	-0.126067	1.04351	0.950478
MAB_1104c	0	7.33834	1.47881	4.52925	4.18665	3.68345	5.83117	2.14772	4.60399	2.92499	-0.166552	0.00943396	0.355037	1.12377	1.43158
MAB_1105c	0	5.85932	1.28565	2.797	2.53884	1.98654	3.55077	1.56423	4.54881	2.80986	0.334821	0.0188679	0.0404903	1.24516	1.11703
MAB_1106c	2.51725	5.76062	0.56228	4.61736	4.72189	4.46256	4.88748	0.424925	4.6554	7.15559	-1.7614	0	-0.554893	1.11717	0.521651
MAB_1107c	5.17577	12.5928	0.99691	6.8254	6.76901	6.29748	7.19705	0.89957	4.65399	19.2755	3.15408	0	-0.0198876	1.0168	1.05666
MAB_1108c	1.54984	6.93741	0.875822	4.09264	4.03463	3.52774	4.58804	1.0603	4.64046	3.50909	0.214719	0	-0.281714	1.15754	0.79483
MAB_1109c	1.19909	6.03323	0.83723	3.38529	3.22728	2.85377	3.9645	1.11073	4.63242	3.53299	0.175231	0	-0.371049	1.20828	0.705495
MAB_1110	0	7.6393	0.980198	3.26666	3.27486	2.82625	3.58567	0.759414	4.61727	9.53755	1.17821	0.00943396	-0.23583	1.21603	0.840715
MAB_1112c	3.90341	7.18612	0.767645	5.16221	4.91071	4.68134	5.52534	0.843999	4.65296	3.44205	1.10407	0	-0.31058	1.07823	0.765964
MAB_1113c	5.39104	8.96192	0.693578	6.94507	6.83252	6.4425	7.44553	1.00304	4.65856	2.67563	0.504475	0	-0.321327	1.01491	0.755217
MAB_1114	4.06737	7.19827	0.531344	5.89685	5.90806	5.54718	6.19572	0.648545	4.65939	3.99687	-0.0558208	0	-0.509758	1.0411	0.566787
MAB_1115	2.74265	9.4408	0.937056	4.5715	4.42491	4.06746	4.98405	0.916587	4.64401	8.88046	1.59922	0	-0.183534	1.12059	0.893011
MAB_1116	2.65138	9.14313	1.31534	4.71382	4.4424	3.88664	5.43148	1.54484	4.62735	4.99186	1.19854	0	0.205207	1.11014	1.28175
MAB_1117c	3.82906	14.5213	2.06005	8.54613	8.13829	7.09496	9.49287	2.39791	4.63524	3.06245	0.595667	0	1.02648	1.03356	2.10302
MAB_1118c	4.74945	11.6248	1.67611	8.25899	8.13594	6.87238	9.47149	2.59911	4.64274	2.18872	0.0123469	0	0.649252	1.02685	1.7258
MAB_1119	4.38761	9.08808	0.775001	6.1754	6.08206	5.66856	6.59167	0.923107	4.6559	5.58297	1.11698	0	-0.257369	1.03237	0.819176
MAB_1120c	6.20837	9.96338	0.72609	7.56873	7.47009	7.02878	8.01401	0.985235	4.65895	3.26594	0.644598	0	-0.289854	1.01594	0.78669
MAB_1121	3.59377	6.94335	0.752025	5.52928	5.57291	5.10842	6.14285	1.03442	4.65401	2.73894	-0.430339	0	-0.304459	1.05648	0.772086
MAB_1122c	4.04887	7.88026	0.609218	7.0506	7.01932	6.65382	7.5964	0.94258	4.65958	6.72572	-1.15154	0	-0.404962	1.01418	0.671583
MAB_1123	6.48267	11.0834	0.729892	8.27927	8.36851	7.85077	8.66483	0.814066	4.65961	5.09504	0.391111	0	-0.297481	1.02737	0.779063
MAB_1124c	5.08404	11.4987	1.47554	7.03532	6.62764	6.02853	7.59384	1.56531	4.64311	4.38206	1.31988	0	0.4613	1.01424	1.53784
MAB_1125c	1.66843	12.2604	2.48308	6.91322	5.80209	5.12129	8.59346	3.47217	4.60181	2.57824	0.705236	0	1.46779	1.01529	2.54434
MAB_1126c	3.36872	7.8259	0.688262	5.9216	5.91532	5.51421	6.32591	0.811704	4.65664	4.40274	-0.141002	0	-0.351932	1.04019	0.724613
MAB_1127c	5.61358	8.90268	0.57113	7.16015	7.06802	6.80788	7.47365	0.665774	4.66032	3.83286	0.552389	0	-0.443	1.01413	0.633544
MAB_1128c	5.2966	10.6883	0.670367	9.51568	9.50818	9.1755	9.98252	0.807017	4.6608	16.1659	-2.38582	0	-0.386492	1.05686	0.690053
MAB_1129	6.46536	10.7158	0.700391	8.34158	8.33436	7.94325	8.88458	0.941324	4.65991	3.82023	-0.212861	0	-0.328561	1.02895	0.747983
MAB_1130	6.17625	11.9316	1.24161	8.91343	8.90392	8.06319	9.74133	1.67814	4.6538	2.54257	0.123562	0	0.201225	1.04039	1.27777
MAB_1131	5.44329	10.6371	1.15896	8.23862	8.20568	7.32107	8.92901	1.60793	4.65361	2.2714	0.0992535	0	0.132634	1.02633	1.20918
MAB_1132c	2.16979	8.6522	1.05702	6.2046	6.14943	5.52299	6.75885	1.23587	4.64869	4.20427	0.00346996	0	0.0253762	1.03164	1.10192
MAB_1133c	2.29566	6.90158	0.851588	5.21907	5.28938	4.53202	5.98082	1.4488	4.6498	2.81399	-0.34761	0	-0.222734	1.07432	0.85381
MAB_1134c	4.81572	10.1884	0.911849	7.55972	7.56212	6.93842	8.2955	1.35707	4.6561	2.97779	-0.264018	0	-0.104082	1.01593	0.972463
MAB_1135c	2.82325	9.61442	1.43637	6.49011	6.70969	5.69127	7.22407	1.5328	4.63805	3.15778	-0.224872	0	0.411947	1.02443	1.48849
[truncated: 3,739 more rows]
